# Supplementary material for: Self-assembled hydrophobic Ala-Aib peptide encapsulating curcumin: a convenient system for water insoluble drugs
Source: Royal Society of Chemistry journal article supplement (doi:10.1039/c9ra10981a), 2020-01-01
Supplement: c9ra10981a1.pdf [file c9ra10981a1.pdf]

## Self-assembled hydrophobic Ala-Aib peptide encapsulating Curcumin: a convenient system for water insoluble drugs.

*Silvia Locarno<sup>a\*</sup>, Simona Argentiere<sup>b</sup>, Alessandro Ruffoni<sup>c</sup>, Daniela Maggioni<sup>d</sup>, Raffaella Soave<sup>e</sup>, Raffaella Bucci<sup>a</sup>, Emanuela Erba<sup>a</sup>, Cristina Lenardi<sup>b</sup>, Maria Luisa Gelmi<sup>a</sup>, Francesca Clerici<sup>a\*</sup>*

<sup>a</sup> Department of Pharmaceutical Sciences, General and Organic Chemistry Section "A. Marchesini", University of Milan, Via Venezian 21, 20133 Milano Italy; <sup>b</sup> CIMAINA, Interdisciplinary Center for Nanostructured materials and Interfaces, Department of Physics, Via Celoria 16, 20133 Milano Italy, <sup>c</sup> School of Chemistry, University of Manchester, Manchester, M13 9PL, UK; <sup>d</sup> Department of Chemistry, Università degli Studi di Milano, Via Golgi 19, 20133 Milano Italy; <sup>e</sup> Institute of Chemical Sciences and Technologies "Giulio Natta", Italian National Research Council, CNR-SCITEC, Via Golgi 19, 20133 Milano.

### List of contents

|                                                                                                             |    |
|-------------------------------------------------------------------------------------------------------------|----|
| General Synthetic Procedures: Solid Phase Peptide Synthesis.....                                            | 2  |
| NOESY experiments in CD <sub>3</sub> OH and in D <sub>2</sub> O/H <sub>2</sub> O for peptide <b>6</b> ..... | 5  |
| Temperature dependence of amide chemical shift ( $\Delta\delta/\Delta T$ ) .....                            | 6  |
| <sup>13</sup> C Magnetic Nonequivalence .....                                                               | 6  |
| Circular dichroism.....                                                                                     | 7  |
| IR spectroscopy.....                                                                                        | 7  |
| DLS spectra of peptide <b>7</b> in water and PBS.....                                                       | 8  |
| Peptide aggregates stability in the two approaches .....                                                    | 8  |
| Dependence of absorption and emission of curcumin from concentration and pH .....                           | 9  |
| Optical properties of curcumin after addition of TW20 .....                                                 | 9  |
| Calibration curve of curcumin in CHCl <sub>3</sub> .....                                                    | 10 |
| FID NMR.....                                                                                                | 11 |
| Abbreviations .....                                                                                         | 19 |
| References.....                                                                                             | 19 |
| CIF file with X-ray data for <b>7</b> .....                                                                 | 20 |

## General Synthetic Procedures: Solid Phase Peptide Synthesis

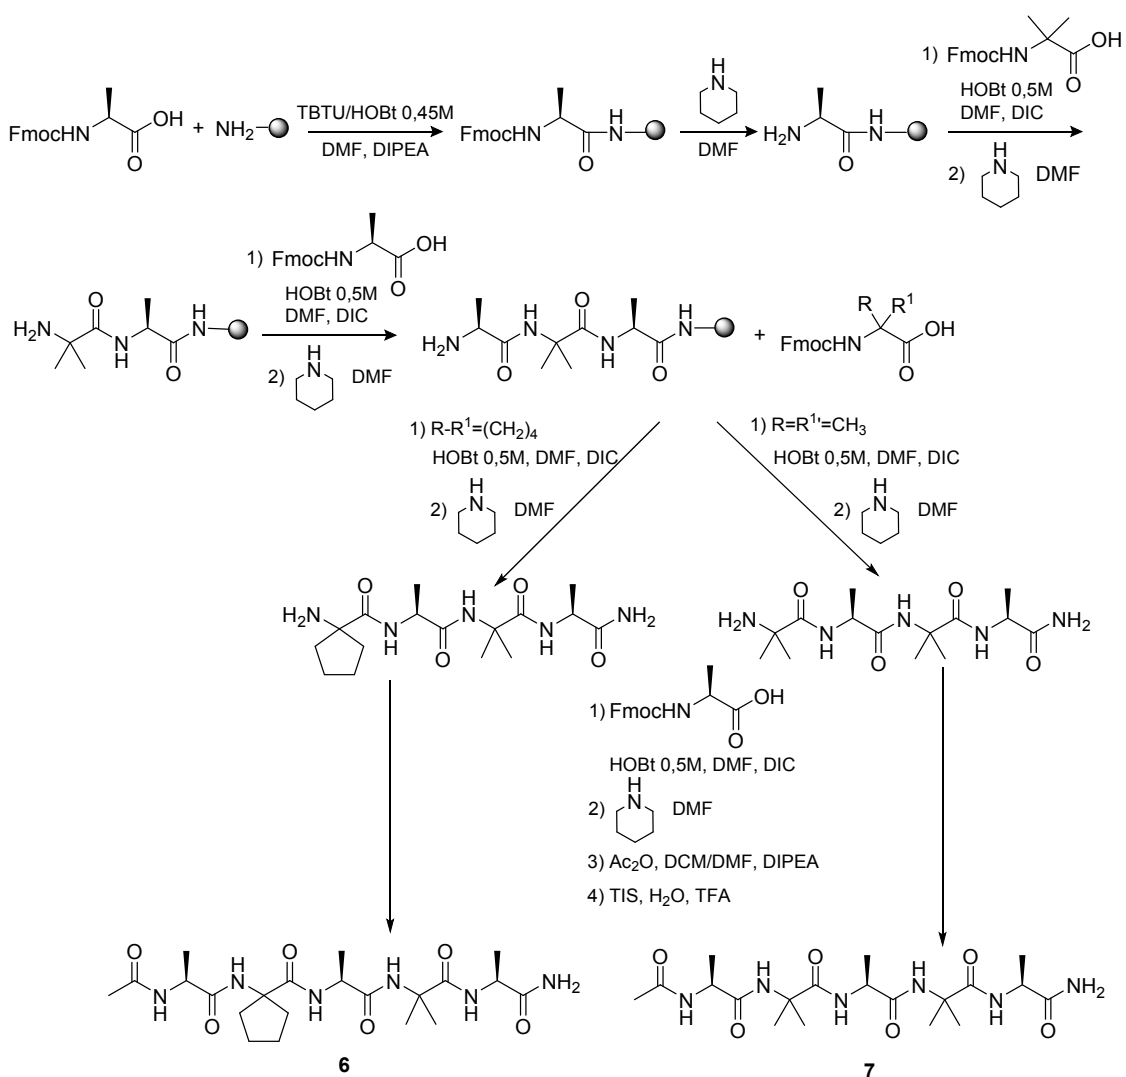

**Scheme S11.** Synthetic scheme of compounds **6** and **7**.

**Resin swelling:** Fmoc-Rink Amide MBHA resin (100-200 mesh, 0.15 mmol) is swelled in a mixture of DCM (6.5 ml) and NMP (1 ml) for 30 minutes before use.

**Fmoc-Deprotection:** Fmoc-protected peptidyl resin is treated with 20% (v/v) piperidine in DMF for 5 minutes. Then, the resin is drained and the treatment is repeated for 15 minutes. The resin is finally washed six times with DMF.

**Coupling Reaction: Method A:** the Fmoc-protected amino acid (3 eq) is dissolved in 0.45M solution of HOBt (5 eq), HBTU (5 eq) and DIPEA (8 eq) in DMF. The peptidyl resin is treated with the mixture for 1h, drained and washed six times with DMF. This method applies for the first amino acid (Ala) and the second one (Aib).

**Method B:** the Fmoc-protected amino acid (3 eq) is dissolved in 0.5M solution of HOBt (5 eq) and DIC (5 eq) in DMF and stirred for 20 minutes. The peptidyl resin is treated with the mixture for 1 hour, drained and washed six times with DMF and six times with DCM. This method applies for the third amino acid (Ala), the fourth (Ac5C, or Aib) and the fifth (Ala).

**Acetylation:** peptidyl resin is treated with a mixture of DCM (1 ml), DMF (1 ml), acetic anhydride (0.1 ml) and DIPEA (0.2 ml) for 30 minutes. Then, the resin is drained and the treatment is repeated for another 30 minutes. The resin is finally washed six times with DMF.

**Cleavage:** Peptidyl resin is washed six times with DCM and dried with ether before starting the cleavage. Then, the resin is treated with a mixture (2 ml) of TFA/TIS/water (92:4.5:3.5) for 2 hours under magnetic stirring. Subsequently, the resin is drained and washed with methanol. The filtrate is concentrated in vacuum and extruded in 40 ml of cold ether. A white fluffy precipitated is formed and collected by centrifugation (6000 rpm, 5 min). The supernatant is decanted, the residue is resuspended in 20 ml of ether and centrifuged again. This is repeated twice. The residue is finally purified by preparative HPLC according to the following method and freeze-dried.

| Time (min) | % A | % B | Flow (ml/min) | Gradient |
|------------|-----|-----|---------------|----------|
| 0          | 100 | 0   | 20            | linear   |
| 1          | 100 | 0   | 20            | linear   |
| 20         | 50  | 50  | 20            | linear   |
| 28         | 0   | 100 | 20            | linear   |
| 29         | 0   | 100 | 20            | linear   |
| 33         | 100 | 0   | 20            | linear   |
| 34         | 100 | 0   | 0             | linear   |

- phase A: H<sub>2</sub>O/CH<sub>3</sub>CN/TFA (95:5:0.1)
- phase B: CH<sub>3</sub>CN/H<sub>2</sub>O/TFA (95:5:0.1)

Peptide purity was measured by reverse phase HPLC according to the method described below:

| Time (min) | % A | % B | Flow (ml/min) |
|------------|-----|-----|---------------|
| 0          | 100 | 0   | 0             |
| 1          | 100 | 0   | 1             |
| 18         | 50  | 50  | 1             |
| 22         | 0   | 100 | 1             |
| 23         | 0   | 100 | 1             |
| 25         | 100 | 0   | 1             |
| 31         | 100 | 0   | 0             |

- phase A: H<sub>2</sub>O/CH<sub>3</sub>CN/TFA 97:3:0.1
- phase B: H<sub>2</sub>O/CH<sub>3</sub>CN/TFA 30:70:0.1

**Peptide 6:** White solid, HPLC 97%, R<sub>f</sub>: 17.78'. mp: 129.8°C. [ $\alpha$ ]<sub>D</sub>: -50 (H<sub>2</sub>O). IR (KBr) 3430(NH), 1658, 1534 (CO) cm<sup>-1</sup>. <sup>1</sup>H NMR (D<sub>2</sub>O+H<sub>2</sub>O, 500 MHz)  $\delta$  1.30 (6H, d, J=7.4 Hz, CH<sub>3</sub> Ala<sub>1</sub>,Ala<sub>3</sub>), 1.35 (3H, d, J=7.4 Hz, CH<sub>3</sub> Ala<sub>5</sub>), 1.41 (6H, s, CH<sub>3</sub> Aib), 1.67-1.71 (4H, m, CH<sub>2</sub>), 1.82-1.86 (2H, m, CH<sub>2</sub>), 1.97 (3H, s, CH<sub>3</sub>), 2.04-2.10 (2H, m, CH<sub>2</sub>), 4.10 (1H, m, CH<sub>Ala3</sub>), 4.16 (1H, m, CH<sub>Ala1</sub>), 4.20 (1H, m, CH<sub>Ala5</sub>), 6.99 (1H, s, CONH), 7.33 (1H, s, CONH), 7.73 (1H, d, J=6.5 Hz, NH<sub>Ala5</sub>), 7.77 (1H, d, J=5.6 Hz, NH<sub>Ala3</sub>), 7.90 (1H, s, NH<sub>Aib</sub>), 8.18 (1H, d, J=5.1 Hz, NH<sub>Ala1</sub>), 8.43 (1H, s, NH<sub>Ac5C</sub>). <sup>13</sup>C NMR (D<sub>2</sub>O, 500 MHz)  $\delta$  15.78 (CH<sub>3</sub> Ala<sub>3</sub>), 15.95 (CH<sub>3</sub> Ala<sub>1</sub>), 16.39 (CH<sub>3</sub> Ala<sub>5</sub>), 21.53 (CH<sub>3</sub>), 23.86, 23.93 (CH<sub>2</sub>), 24.30 (CH<sub>3</sub> Aib), 36.03, 36.64 (CH<sub>2</sub>), 49.88 (CH<sub>Ala5</sub>), 50.23 (CH<sub>Ala1</sub>), 50.78 (CH<sub>Ala3</sub>), 56.62 (C<sub>Aib</sub>), 66.66 (C<sub>Ac5C</sub>), 174.22 (CO<sub>Me</sub>), 175.10 (CO<sub>Ala3</sub>), 175.61 (CO<sub>Ala1</sub>), 176.72 (CO<sub>Ac5C</sub>), 177.02 (CO<sub>Aib</sub>), 178.17 (CO<sub>Ala5</sub>). ESI-MS (m/z): 491.4 [M+Na]<sup>+</sup>

**Peptide 7:** White solid, HPLC 95%, R<sub>f</sub>: 14.12'. mp: 73.2°C. [ $\alpha$ ]<sub>D</sub>: +7.6 (CH<sub>3</sub>OH). IR (KBr) 3429, 3276 (NH), 1683, 1658, 1543 (CO) cm<sup>-1</sup>. <sup>1</sup>H NMR (D<sub>2</sub>O+H<sub>2</sub>O, 500 MHz)  $\delta$  1.30 (6H, d, J=7.4 Hz, CH<sub>3</sub> Ala<sub>1</sub>,Ala<sub>3</sub>), 1.33 (3H, d, J=7.5 Hz, CH<sub>3</sub> Ala<sub>5</sub>), 1.37 (6H, d, J=5.6 Hz, CH<sub>3</sub> Aib<sub>2</sub>), 1.40 (6H, s, CH<sub>3</sub> Aib<sub>4</sub>), 1.95 (3H, s, CH<sub>3</sub>), 4.08 (1H, m, CH<sub>Ala3</sub>), 4.13 (1H, m, CH<sub>Ala1</sub>), 4.17 (1H, m, CH<sub>Ala5</sub>), 6.98 (1H, s, CONH), 7.33 (1H, s, CONH), 7.73 (1H, d, J=6.6 Hz, NH<sub>Ala5</sub>), 7.75 (1H, d, J=5.7 Hz, NH<sub>Ala3</sub>), 7.90 (1H, s, NH<sub>Aib4</sub>), 8.18 (1H, d, J=5.4 Hz, NH<sub>Ala1</sub>), 8.35 (1H, s, NH<sub>Aib2</sub>). <sup>13</sup>C NMR (D<sub>2</sub>O, 500 MHz)  $\delta$  16.17 (CH<sub>3</sub> Ala<sub>3</sub>), 16.51 (CH<sub>3</sub> Ala<sub>1</sub>), 16.78 (CH<sub>3</sub> Ala<sub>5</sub>), 21.96 (CH<sub>3</sub>), 24.24, 24.35 (CH<sub>3</sub> Aib<sub>4</sub>), 24.53, 24.64 (CH<sub>3</sub> Aib<sub>2</sub>), 50.24 (CH<sub>Ala5</sub>), 50.57 (CH<sub>Ala1</sub>), 51.05 (CH<sub>Ala3</sub>), 56.81 (C<sub>Aib4</sub>), 57.01 (C<sub>Aib2</sub>), 174.56 (CO<sub>Me</sub>), 175.37 (CO<sub>Ala3</sub>), 175.45 (CO<sub>Ala1</sub>), 177.41 (CO<sub>Aib2</sub>), 177.67 (CO<sub>Aib4</sub>), 178.55 (CO<sub>Ala5</sub>). ESI-MS (m/z): 466.4 [M+Na]<sup>+</sup>

NOESY experiments in  $CD_3OH$  and in  $D_2O/H_2O$  for peptide **6**

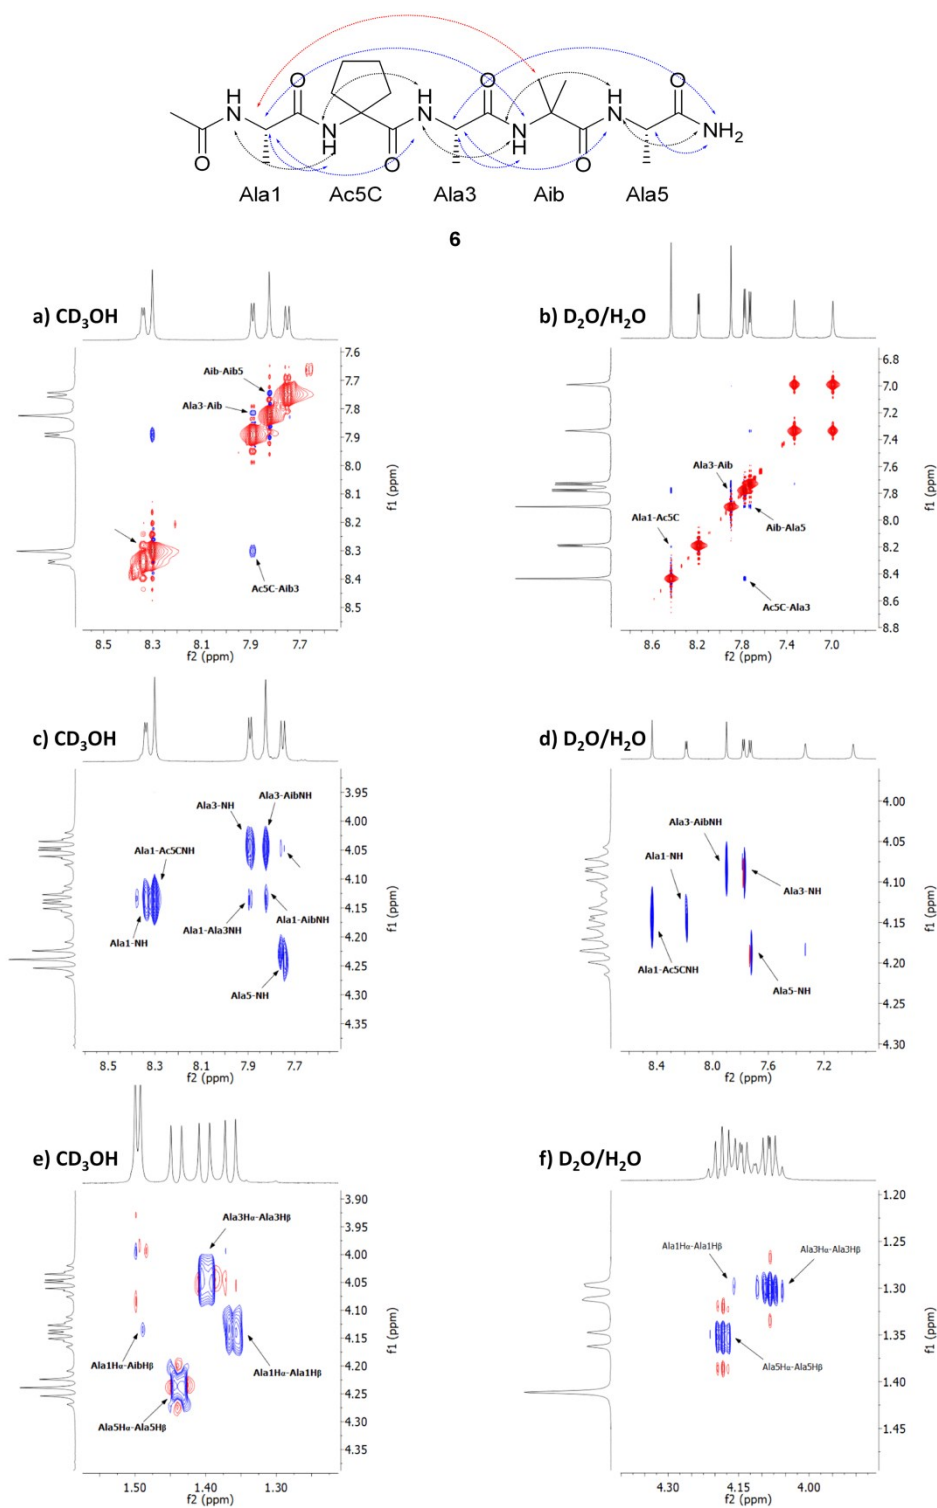

**Figure S11.** NOESY experiments analysis for **6** of:  $NH_i, NH_{i+1}$  NOE cross peaks region in a)  $CD_3OH$  and in b)  $D_2O/H_2O$ ;  $C^\alpha H_i-NH$  region in c)  $CD_3OH$  and in d)  $D_2O/H_2O$ ;  $C^\alpha H-C^\beta$  region in e)  $CD_3OH$  and in f)  $D_2O/H_2O$ .

### Temperature dependence of amide chemical shift ( $\Delta\delta/\Delta T$ )

Confirmation of the helical conformation of peptides **6** and **7** was given estimating the temperature dependence of amide chemical shift ( $\Delta\delta/\Delta T$ , 273–300 K). In  $\text{CD}_3\text{OH}$ ,  $\Delta\delta/\Delta T$  NH values of Ala3, Aib4, Ala5 are around 4.0 ppb/K (Fig. SI2a,b). The lowest value of  $\Delta\delta/\Delta T$  is attributed to one NH of  $\text{CONH}_2$ , this means that the most stable part is amide at C-terminus. On the other hand, the other NHs (Ala1, Aib2 or Ac5c at N-terminus and the other NH proton of the primary amide) are not involved in any intramolecular H-bond ( $\Delta\delta/\Delta T$  6–8 ppb/K).

A different behaviour was found in  $\text{D}_2\text{O}/\text{H}_2\text{O}$  (Fig. SI2c,d) where higher  $\Delta\delta/\Delta T$  values were detected for all NHs. Moreover it is interesting to notice that in water the differences between the two primary amide protons  $\Delta\delta/\Delta T$  values are smaller than in methanol. Especially one of the two primary amides of peptides **6** and **7** with a values of 4 ppb/K seems to be involved in a H-bond but it's not possible to determinate the inter- or intra-molecular nature of that bond.

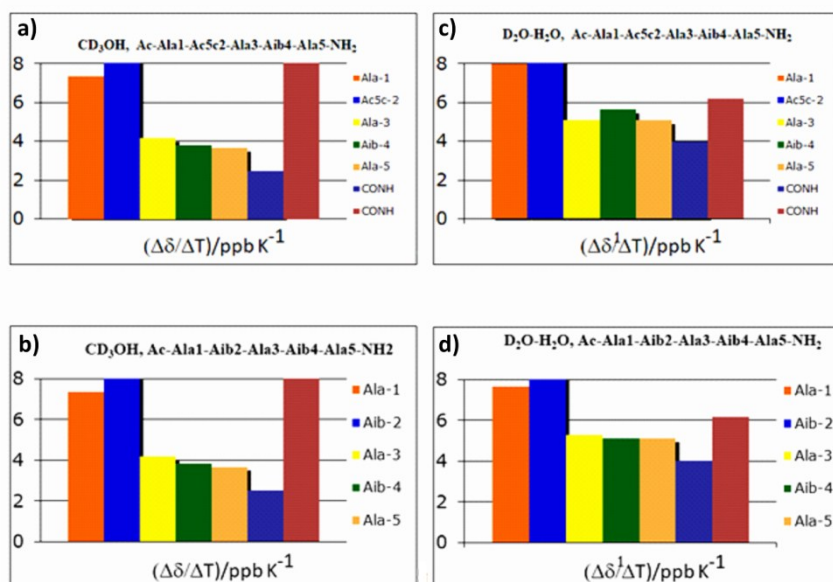

**Figure SI2.** Temperature dependence of amide chemical shift ( $\Delta\delta/\Delta T$  273–300 K) of peptides **6** and **7** in a,b)  $\text{CD}_3\text{OH}$  and c,d)  $\text{D}_2\text{O}/\text{H}_2\text{O}$ .

### $^{13}\text{C}$ Magnetic Nonequivalence

The evaluation of the  $^{13}\text{C}$ -Magnetic Nonequivalence (MNE) of the signals related to the diastereotopic methyl groups of Aib4 was performed by HSQC experiments in  $\text{CD}_3\text{CN}$ ,  $\text{CD}_3\text{OD}$  and  $\text{D}_2\text{O}$  as shown in table SI1. <sup>1</sup>

| Solvent                | Peptide 6     |              | Peptide 7     |              |
|------------------------|---------------|--------------|---------------|--------------|
|                        | Aib4 $\delta$ | MNE $\delta$ | Aib4 $\delta$ | MNE $\delta$ |
| $\text{CD}_3\text{CN}$ | 26.384-22.894 | 3.49         | 26.79-23.31   | 3.48         |

|                         |               |       |             |      |
|-------------------------|---------------|-------|-------------|------|
| <b>CD<sub>3</sub>OD</b> | 25.237-23.112 | 1.125 | 25.65-23.50 | 2.15 |
| <b>D<sub>2</sub>O</b>   | 24.300-23.943 | 0.36  | 24.65-24.24 | 0.41 |

**Table S11.** Chemical shift in ppm of Aib-4 in peptides **6** and **7** and MNE.

### Circular dichroism

Circular dichroism (CD) spectra were acquired in 2,2,2-trifluoroethanol (TFE), MeOH and water at 25°C with a peptides concentration of 0.1 mM (Fig. S13).

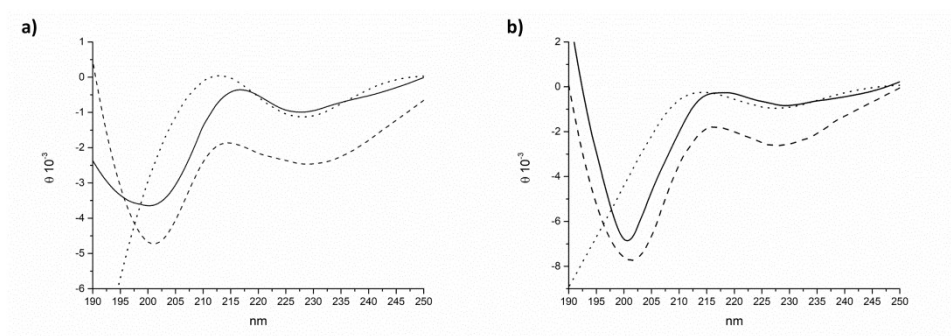

**Figure S13.** CD spectra (0.1 mM) of peptides a) **6** and b) **7** in MeOH (straight), TFE (dash), and water (dot).

### IR spectroscopy

| peptide  | $\alpha$ -helix IR-band<br>( $1656 \pm 2 \text{ cm}^{-1}$ ) | Random coil IR-band<br>( $1648 \pm 2 \text{ cm}^{-1}$ ) |
|----------|-------------------------------------------------------------|---------------------------------------------------------|
| <b>6</b> | 1657                                                        | 1648                                                    |
| <b>7</b> | 1654                                                        | 1648                                                    |

**Table S12.** IR signals after deconvolution of N-H stretching vibration region of the amides. <sup>2</sup>

*DLS spectra of peptide 7 in water and PBS*

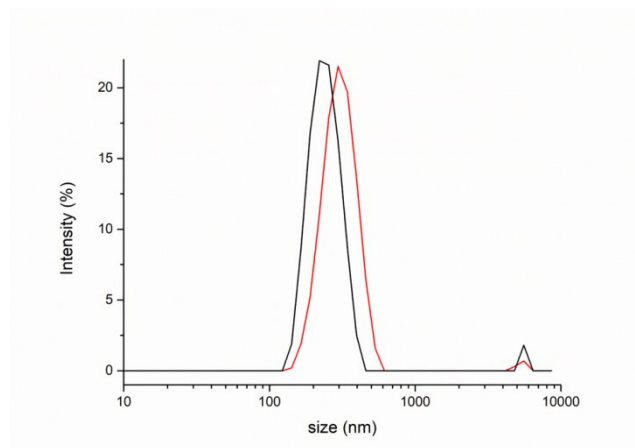

**Figure S14.** Size distribution by intensity of peptide **7** in water (black) and in PBS with 0.34% v/v of DMSO (red). Mean results are given for three different measurements.

*Peptide aggregates stability in the two approaches*

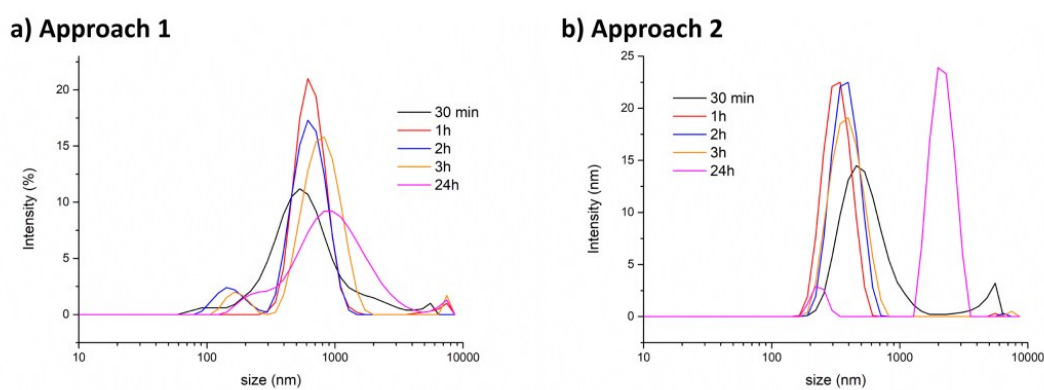

**Figure S15.** Stability test of peptide aggregates prepared according a) approach 1 and b) approach 2.



*Dependence of absorption and emission of curcumin from concentration and pH*

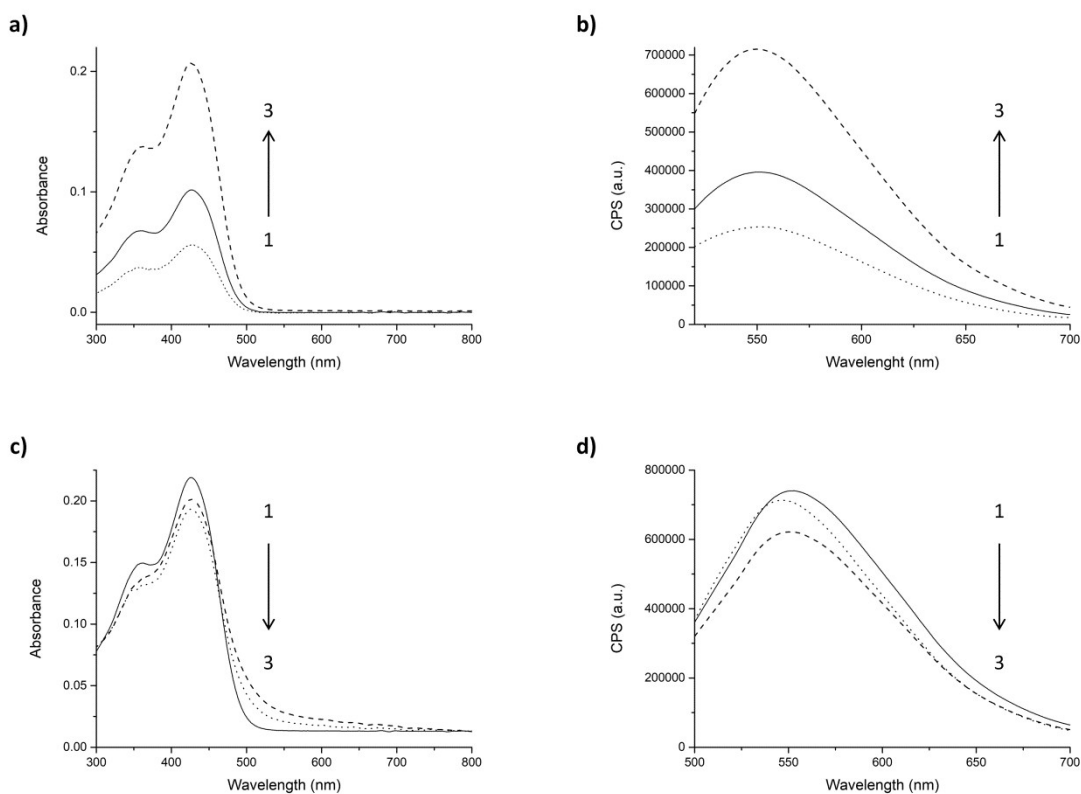

**Figure S16.** a) Absorption and b) fluorescence spectra at different concentrations of curcumin: (1) 2.4  $\mu\text{M}$  (dot), (2) 4.8  $\mu\text{M}$  (straight), (3) 9.6  $\mu\text{M}$  (dash) in water with 0.34% v/v of DMSO. c) Absorption and d) fluorescence spectra of curcumin at decreasing pH in water with 0.34% v/v of DMSO.

*Optical properties of curcumin after addition of TW20*

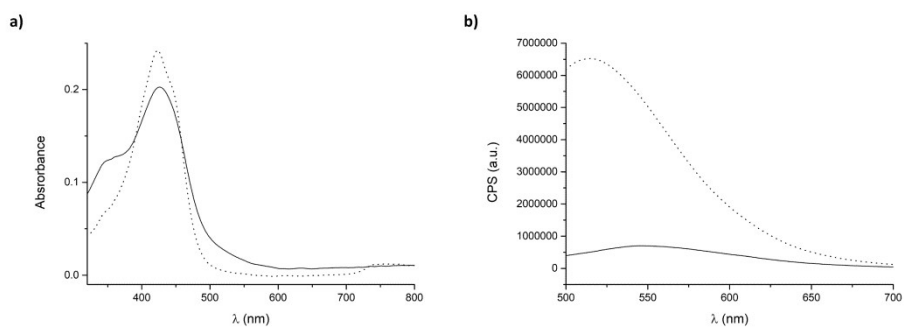

**Figure S17.** a) Absorption and b) fluorescence spectra of curcumin (9.6  $\mu\text{M}$ ) in PBS (straight) and in presence of 0.005% of TW20 (dot).

Calibration curve of curcumin in  $\text{CHCl}_3$

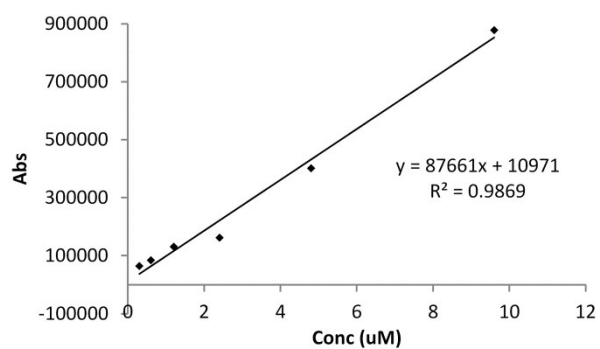

**Figure S18.** Calibration curve of curcumin in  $\text{CHCl}_3$ .

FID NMR

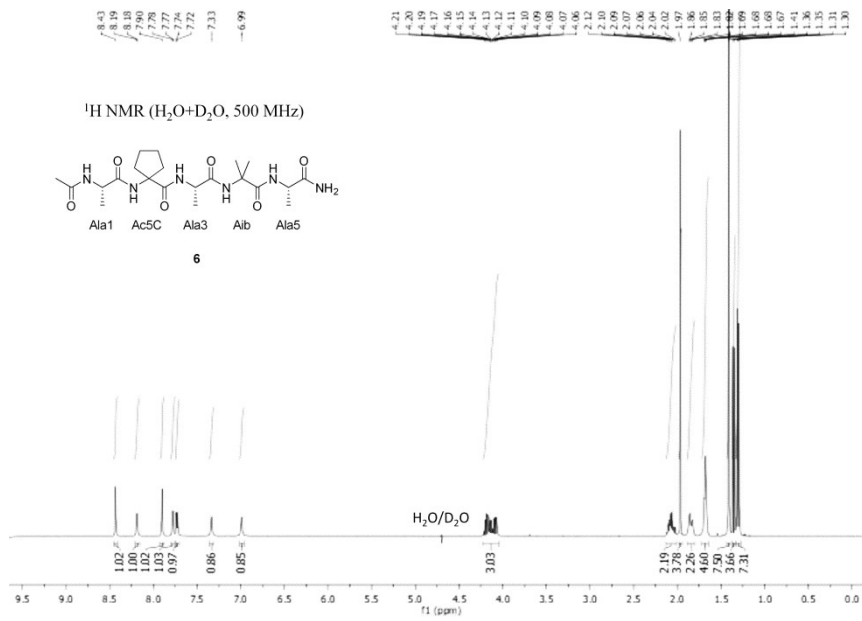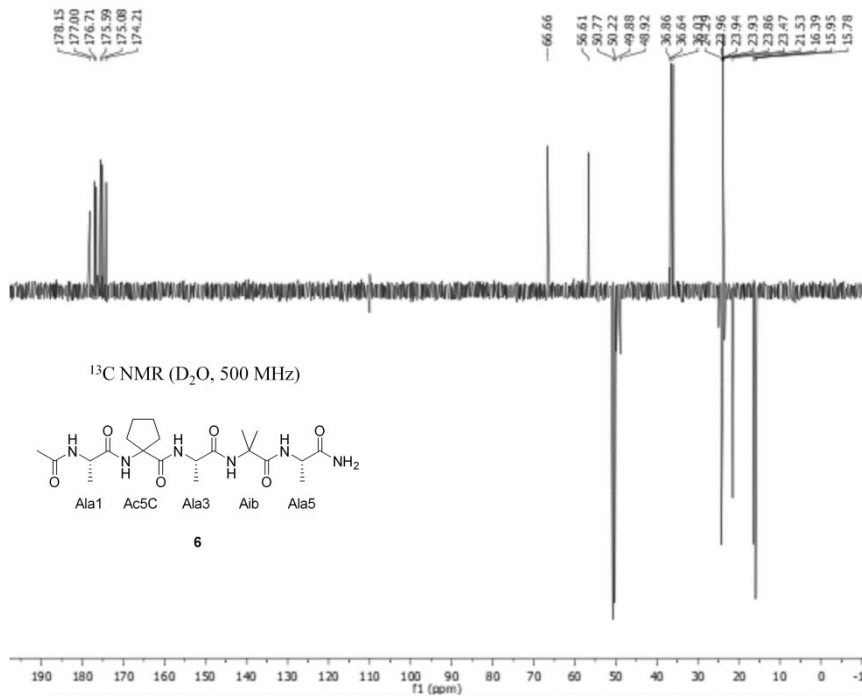

HMBC (H<sub>2</sub>O+D<sub>2</sub>O, 500 MHz)

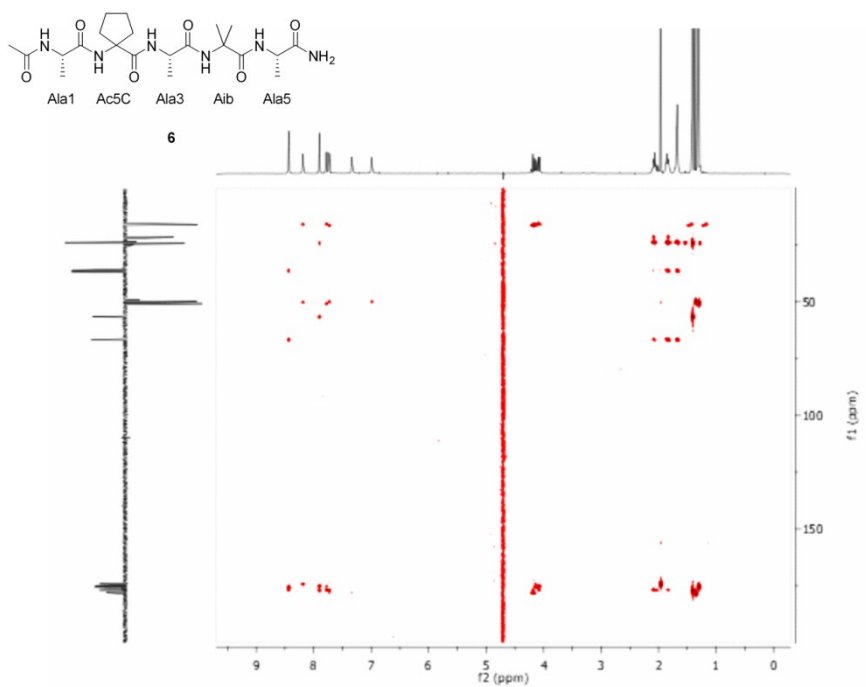

HSQC (D<sub>2</sub>O, 500 MHz)

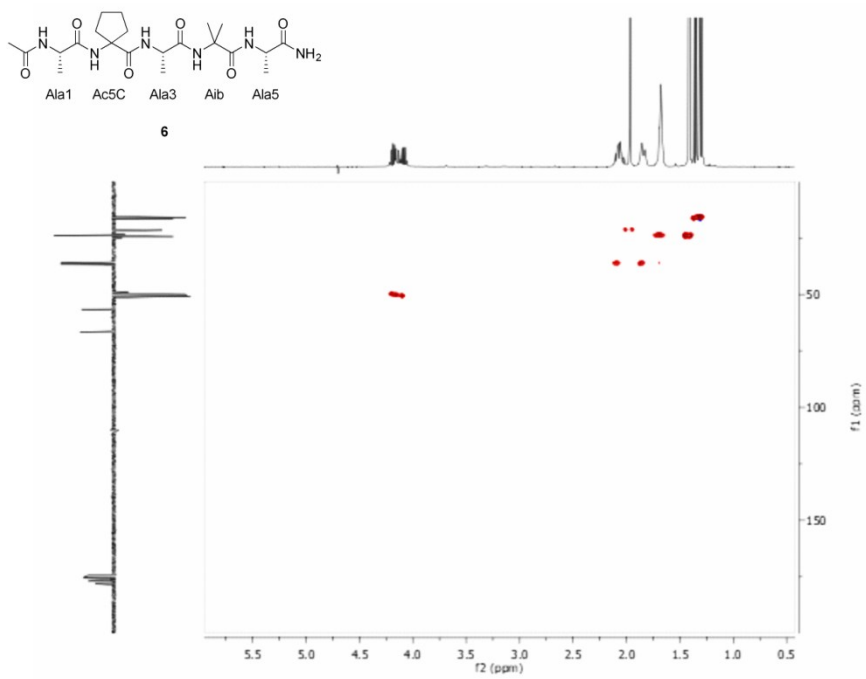

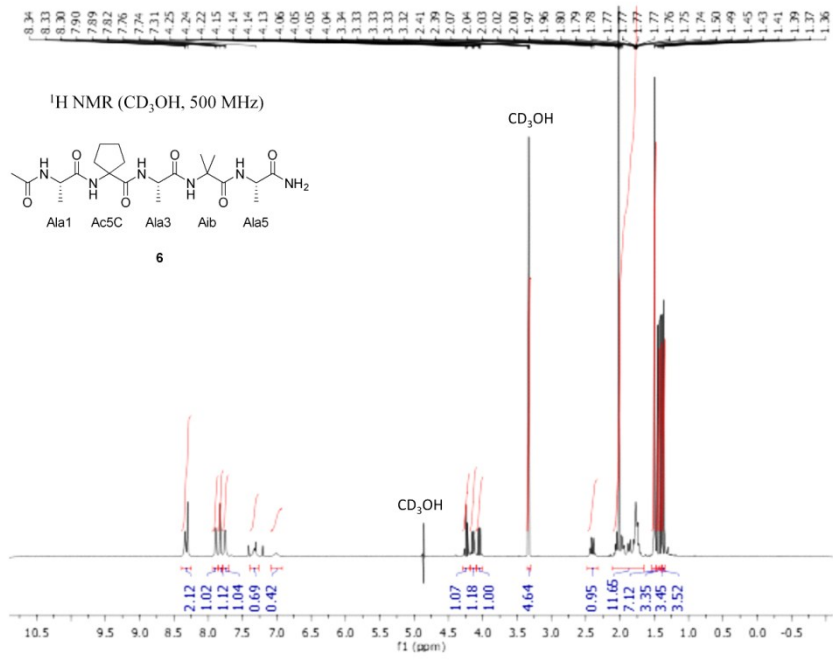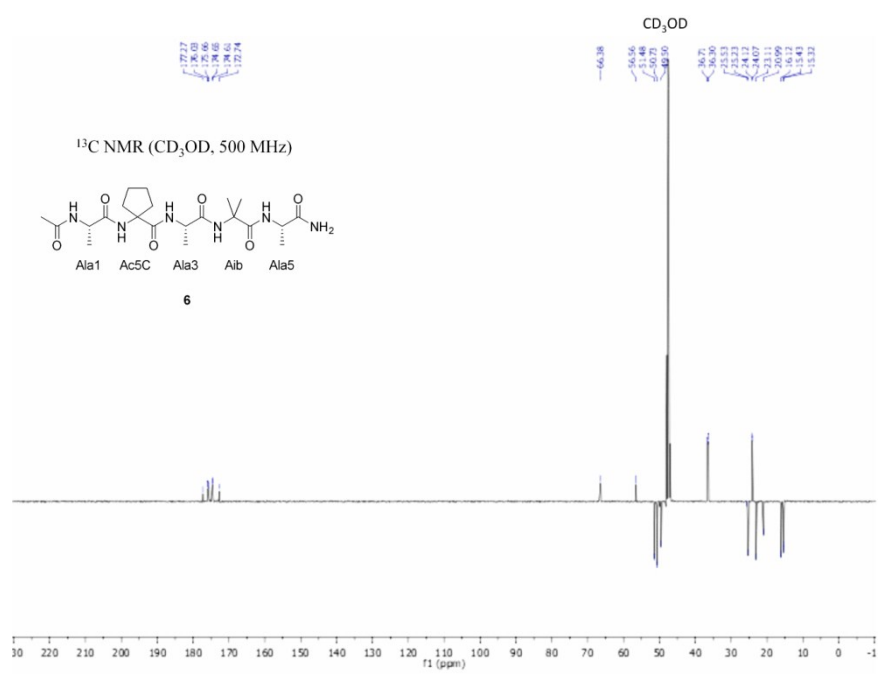

HMBC (CD<sub>3</sub>OH, 500 MHz)

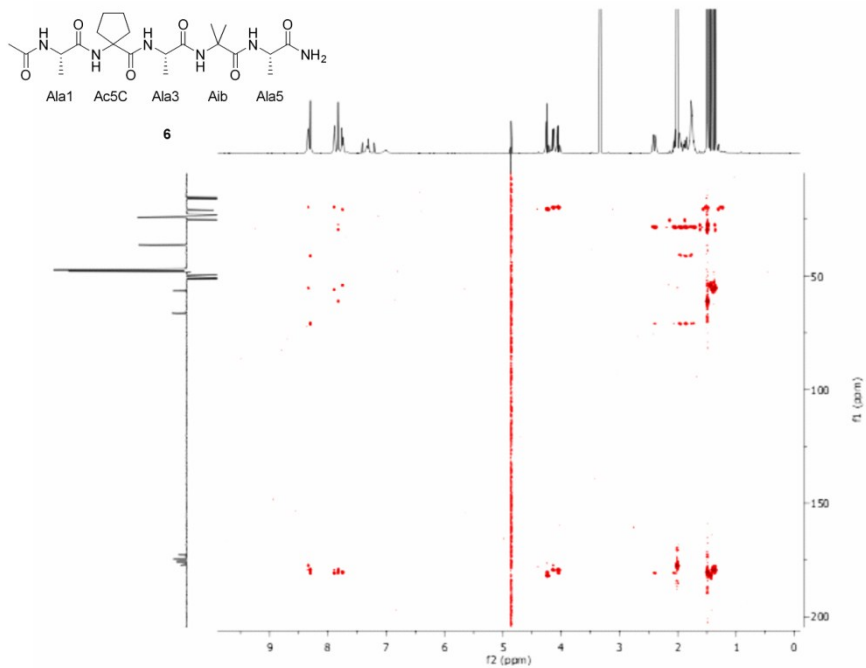

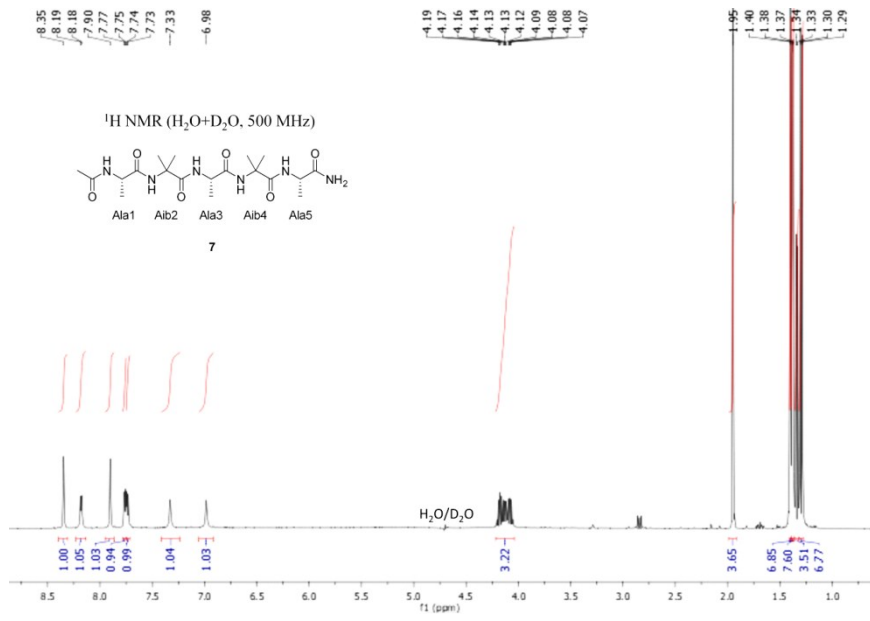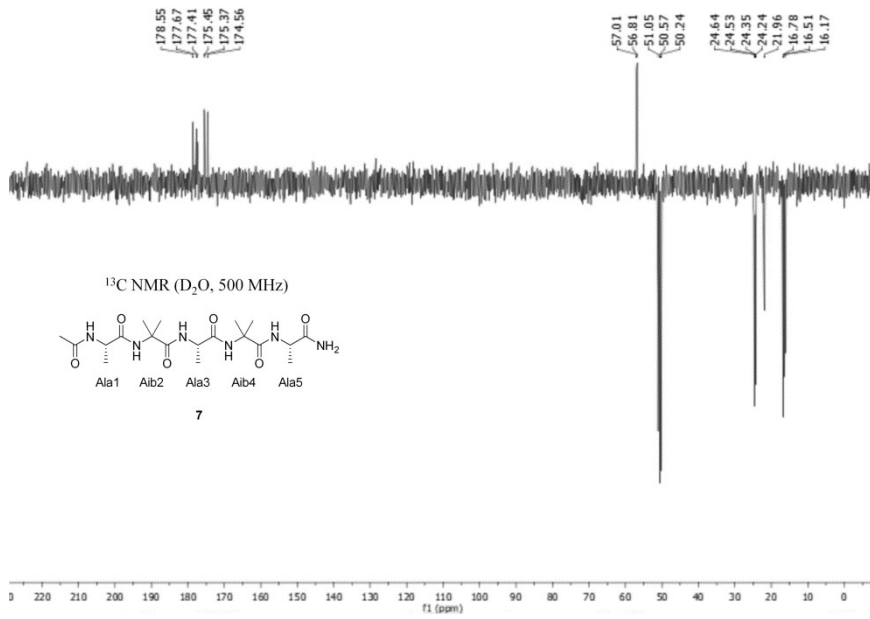

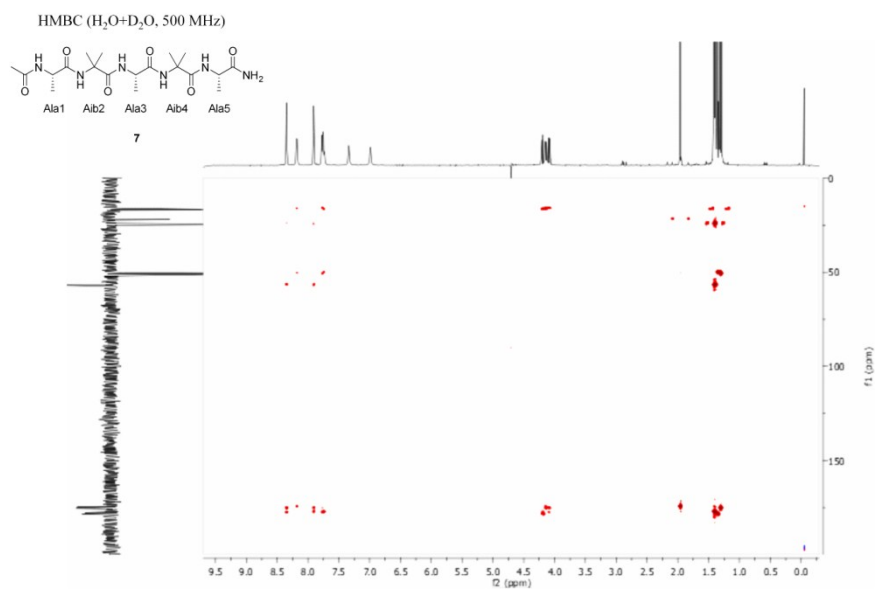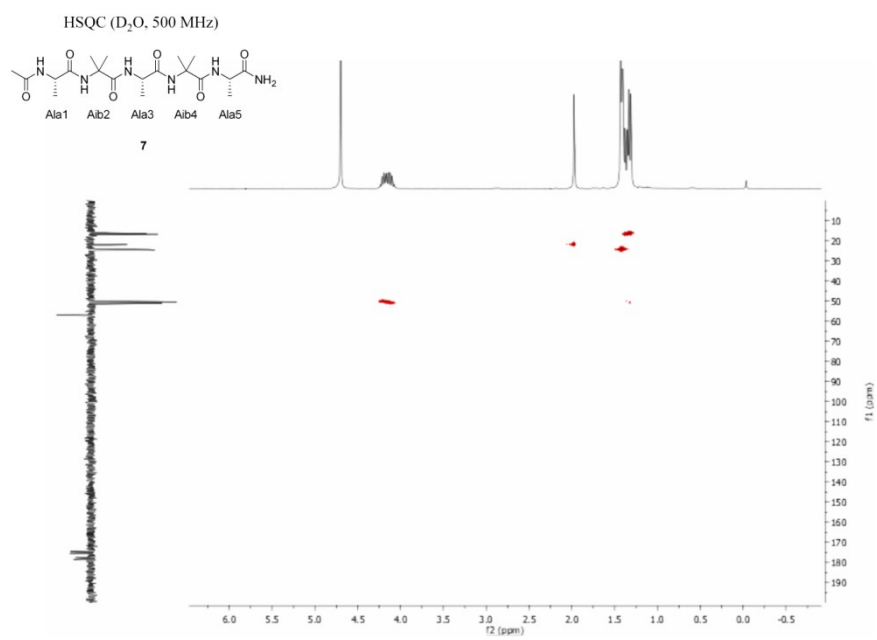



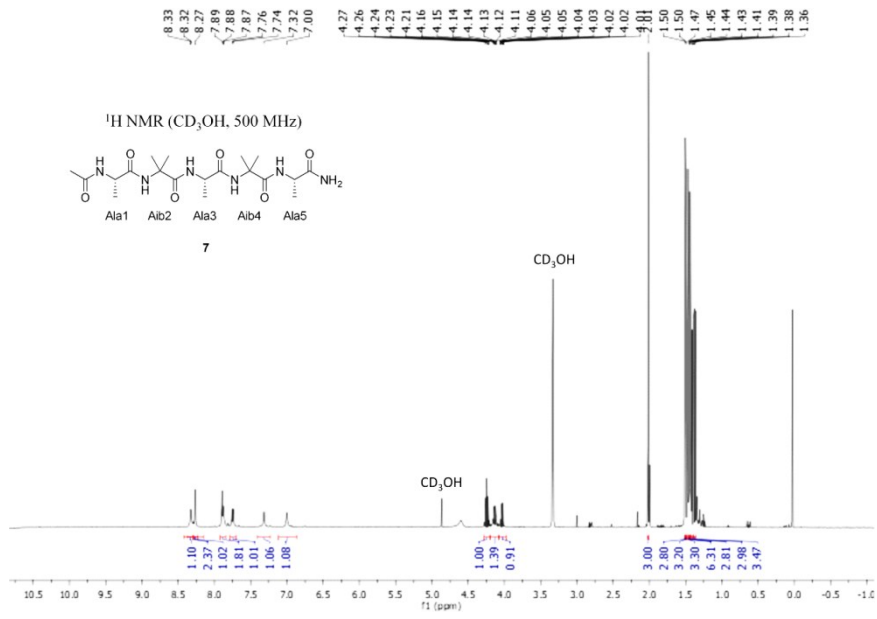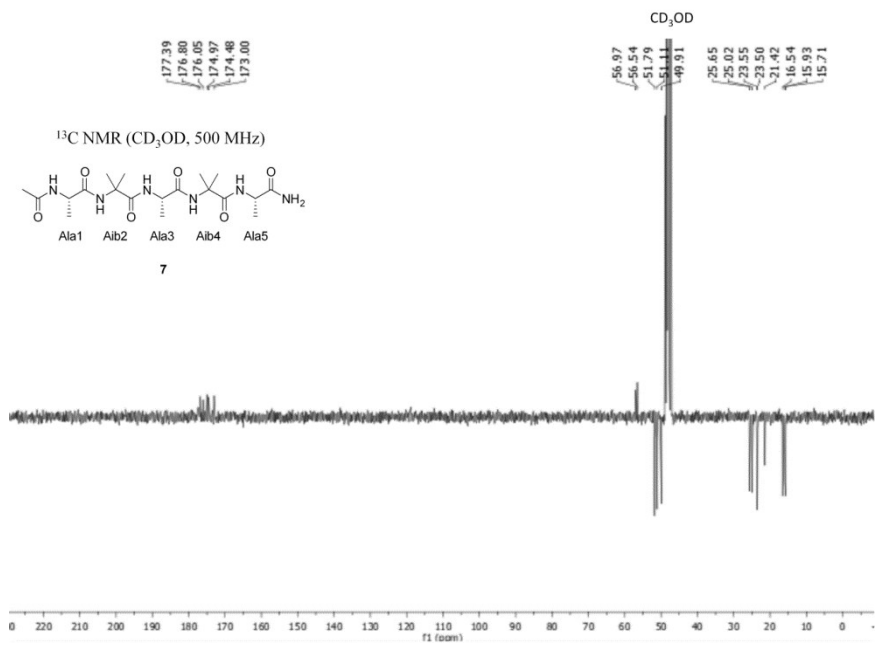

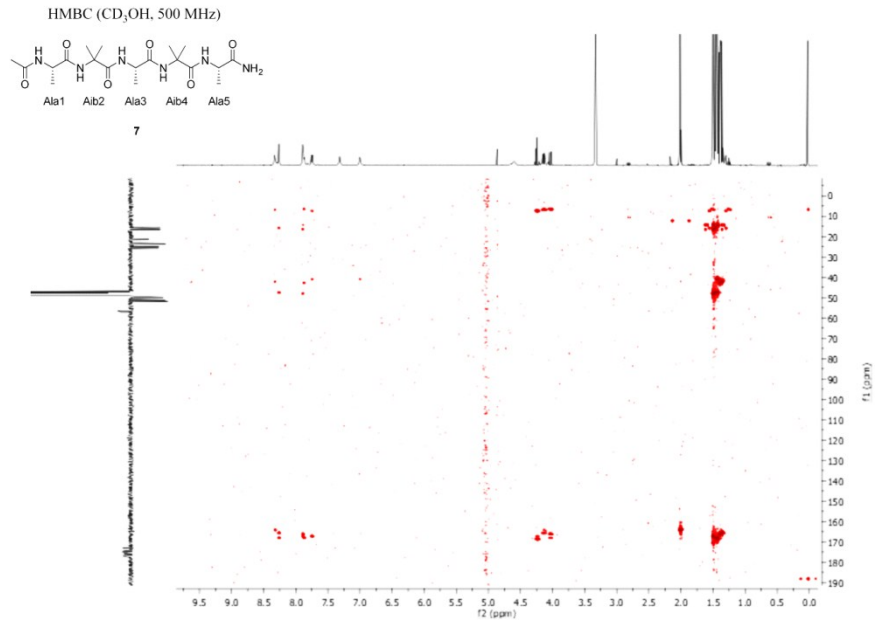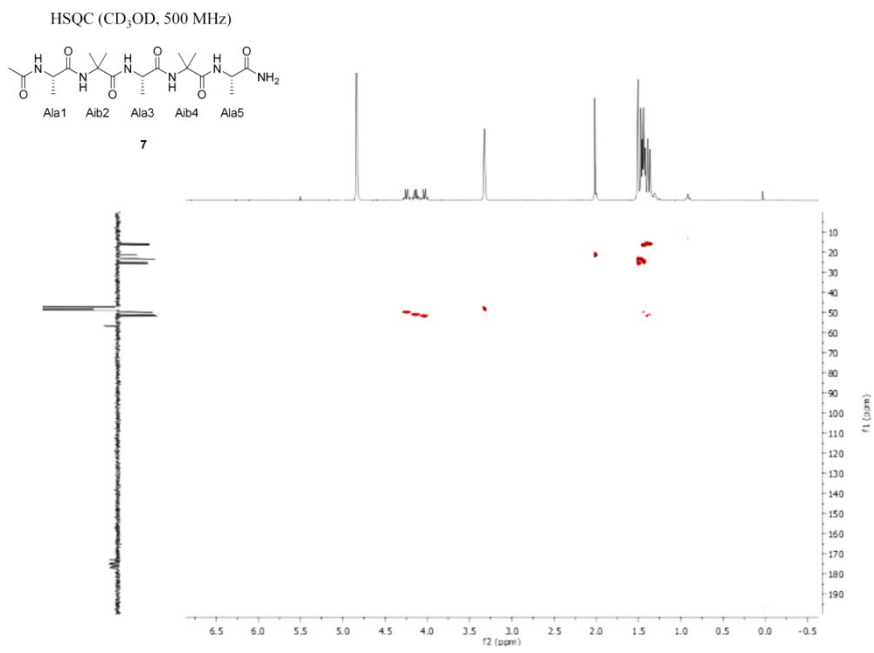

### *Abbreviations*

aa, amino acid; Ac5C, aminocyclopentanecarboxylic acid; Aib,  $\alpha$ -aminoisobutyric acid; Ala, Alanine; CD, circular dichroism; DCM, dichloromethane; DIC, N,N'-diisopropylcarbodiimide; DIPEA, N,N-Diisopropylethylamine; DLS, Dynamic Light Scattering; DMF, N,N-dimethylformamide; DMSO, dimethyl sulfoxide; Fmoc, fluorenylmethyloxycarbonyl; HBTU, hexafluorophosphate benzotriazole tetramethyl uranium; HOBt, 1-hydroxybenzotriazole; HPLC, high-performance liquid chromatography; IR, infrared spectroscopy; MBHA, 4-methylbenzhydrylamine; MNE, magnetic non-equivalence; NMP, N-methyl-2-pyrrolidone; NMR, nuclear magnetic resonance; NOESY, nuclear overhauser effect spectroscopy; PBS, phosphate buffer saline; TFA, trifluoroacetic acid; TFE, trifluoroethanol; TIS, triisopropylsilane; TW20, Tween 20.

### *References*

- (1) Longo, E.; Moretto, A.; Formaggio, F.; Toniolo, C. *Chirality* **2011**, *23*, 756-760.
- (2) Kong, J.; Yu, S. *Acta Biochimica et Biophysica Sinica* **2007**, *39*, 549-559.

*CIF file with X-ray data for 7*

data\_compound7

\_audit\_creation\_method SHELXL-2014/6

#----- SUBMISSION DETAILS -----#

# Name and address of author for correspondence

\_publ\_contact\_author\_name 'Raffaella Soave'  
\_publ\_contact\_author\_address ;Istituto di Scienze e Tecnologie Chimiche "Giulio Natta"  
CNR Via C. Golgi, 19 I-20133 Milano Italy;  
\_publ\_contact\_author\_email 'raffaella.soave@istm.cnr.it'  
\_publ\_contact\_author\_fax '+39(2)503142300'  
\_publ\_contact\_author\_phone '+39(2)503142301'  
\_publ\_requested\_journal 'xxx'  
\_publ\_contact\_letter  
;

\_publ\_section\_title;  
Encapsulation of Curcumin in self-assemblies of hydrophobic Ala-Aib short  
peptide. A convenient system for water insoluble drugs;

loop\_

\_publ\_author\_name  
\_publ\_author\_address  
'Locarno, Silvia'

;

Department of Pharmaceutical Sciences, General and Organic  
Chemistry Section A. Marchesini  
Universit`a degli Studi di Milano  
Via Venezian 21  
I-20133 Milano  
Italy

;

'Argentiere, Simona'

;

CIMAINA, Interdisciplinary Center for Nanostructured materials and Interfaces  
Department of Physics  
Via Celoria 16  
20133 Milano  
Italy

;

'Ruffoni, Alessandro'

;

School of Chemistry  
University of Manchester  
Manchester, M13 9PL, UK

;

'Maggioni, Daniela'

;

Department of Chemistry  
Universit`a degli Studi di Milano  
Via Golgi 19  
I-20133 Milano  
Italy

;

'Soave, Raffaella'

;

Istituto di Scienze e Tecnologie Chimiche "Giulio Natta"  
Consiglio Nazionale delle Ricerche  
Via C. Golgi, 19  
I-20133 Milano  
Italy

;

'Bucci, Raffaella'

;

Department of Pharmaceutical Sciences, General and Organic  
Chemistry Section A. Marchesini  
Universit`a degli Studi di Milano  
Via Venezian 21  
I-20133 Milano  
Italy

;

'Erba, Emanuela'

;

Department of Pharmaceutical Sciences, General and Organic  
Chemistry Section A. Marchesini  
Universit`a degli Studi di Milano  
Via Venezian 21  
I-20133 Milano  
Italy

;

'Lenardi, Cristina'

;

CIMAINA, Interdisciplinary Center for Nanostructured materials and Interfaces  
Department of Physics  
Via Celoria 16  
20133 Milano  
Italy

;
'Gelmi, Maria Luisa'
;
Department of Pharmaceutical Sciences, General and Organic
Chemistry Section A. Marchesini
Universit`a degli Studi di Milano
Via Venezian 21
I-20133 Milano
Italy

;
'Clerici, Francesca'
;
Department of Pharmaceutical Sciences, General and Organic
Chemistry Section A. Marchesini
Universit`a degli Studi di Milano
Via Venezian 21
I-20133 Milano
Italy

#----- CHEMICAL INFORMATION -----#

\_chemical\_name\_systematic ?
\_chemical\_name\_common ?
\_chemical\_melting\_point ?
\_chemical\_formula\_moiety ?
\_chemical\_formula\_sum
'C19 H38 N6 O8'
\_chemical\_formula\_weight 478.55

loop\_
\_atom\_type\_symbol
\_atom\_type\_description
\_atom\_type\_scat\_dispersion\_real
\_atom\_type\_scat\_dispersion\_imag
\_atom\_type\_scat\_source
'C' 'C' 0.0033 0.0016
'International Tables Vol C Tables 4.2.6.8 and 6.1.1.4'
'H' 'H' 0.0000 0.0000
'International Tables Vol C Tables 4.2.6.8 and 6.1.1.4'
'N' 'N' 0.0061 0.0033
'International Tables Vol C Tables 4.2.6.8 and 6.1.1.4'
'O' 'O' 0.0106 0.0060
'International Tables Vol C Tables 4.2.6.8 and 6.1.1.4'

\_space\_group\_crystal\_system monoclinic

```
_space_group_IT_number      4
_space_group_name_H-M_alt    'P 21'
_space_group_name_Hall       'P 2yb'
```

```
_shelx_space_group_comment
```

```
;
```

The symmetry employed for this shelxl refinement is uniquely defined by the following loop, which should always be used as a source of symmetry information in preference to the above space-group names.

They are only intended as comments.

```
;
```

```
loop_
```

```
_space_group_symop_operation_xyz
```

```
'x, y, z'
```

```
'-x, y+1/2, -z'
```

```
_cell_length_a      10.156(2)
_cell_length_b      11.413(2)
_cell_length_c      11.888(2)
_cell_angle_alpha    90
_cell_angle_beta     111.69(3)
_cell_angle_gamma    90
_cell_volume         1280.3(5)
_cell_formula_units_Z  2
_cell_measurement_temperature 293(2)
_cell_measurement_reflns_used 3496
_cell_measurement_theta_min 2.566
_cell_measurement_theta_max 22.244
```

```
_exptl_crystal_description 'prism'
_exptl_crystal_colour      'colourless'
_exptl_crystal_size_max    0.30
_exptl_crystal_size_mid    0.15
_exptl_crystal_size_min    0.12
_exptl_crystal_density_meas  ?
_exptl_crystal_density_method  ?
_exptl_crystal_density_diffn  1.241
_exptl_crystal_F_000       516
_exptl_transmission_factor_min 0.7810
_exptl_transmission_factor_max 0.8623
_exptl_absorpt_coefficient_mu 0.097
_shelx_estimated_absorpt_T_min  ?
_shelx_estimated_absorpt_T_max  ?
_exptl_absorpt_correction_type 'multi-scan'
_exptl_absorpt_correction_T_min  ?
_exptl_absorpt_correction_T_max  ?
```

```

_exptl_absorpt_process_details 'SADABS; Sheldrick, 2004'
_exptl_absorpt_special_details ?
_diffrn_ambient_temperature 293(2)
_diffrn_radiation_wavelength 0.71073
_diffrn_radiation_type MoK\alpha
_diffrn_source 'fine-focus sealed tube'
_diffrn_radiation_monochromator graphite
_diffrn_measurement_device_type 'Bruker AXS APEX CCD area-detector'
_diffrn_measurement_method '\w-scan'
_diffrn_detector_area_resol_mean ?
_diffrn_reflns_number 22941
_diffrn_reflns_av_unetl/netl 0.0476
_diffrn_reflns_av_R_equivalents 0.0336
_diffrn_reflns_limit_h_min -14
_diffrn_reflns_limit_h_max 14
_diffrn_reflns_limit_k_min -16
_diffrn_reflns_limit_k_max 16
_diffrn_reflns_limit_l_min -16
_diffrn_reflns_limit_l_max 16
_diffrn_reflns_theta_min 1.844
_diffrn_reflns_theta_max 29.997
_diffrn_reflns_theta_full 25.242
_diffrn_measured_fraction_theta_max 1.000
_diffrn_measured_fraction_theta_full 1.000
_diffrn_reflns_Laue_measured_fraction_max 1.000
_diffrn_reflns_Laue_measured_fraction_full 1.000
_diffrn_reflns_point_group_measured_fraction_max 0.999
_diffrn_reflns_point_group_measured_fraction_full 1.000
_reflns_number_total 7475
_reflns_number_gt 4289
_reflns_threshold_expression 'I > 2\sigma(I)'
_reflns_Friedel_coverage 0.910
_reflns_Friedel_fraction_max 0.999
_reflns_Friedel_fraction_full 1.000

```

```
_reflns_special_details
```

```
;
```

Reflections were merged by SHELXL according to the crystal class for the calculation of statistics and refinement.

\_reflns\_Friedel\_fraction is defined as the number of unique Friedel pairs measured divided by the number that would be possible theoretically, ignoring centric projections and systematic absences.

```
;
```



```

_computing_data_collection 'SAINT+ (Bruker AXS, Madison (USA) 1994-1996)'
_computing_cell_refinement 'SAINT+ (Bruker AXS, Madison (USA) 1994-1996)'
_computing_data_reduction 'SAINT+ (Bruker AXS, Madison (USA) 1994-1996)'
_computing_structure_solution 'SHELXS97 (Sheldrick, 1997)'
_computing_structure_refinement 'SHELXL-2014/4 (Sheldrick, 2014)'
_computing_molecular_graphics 'Diamond v3.2i (Brandenburg, 2012)'
_computing_publication_material ?
_refine_special_details ?
_refine_ls_structure_factor_coef Fsqd
_refine_ls_matrix_type full
_refine_ls_weighting_scheme calc
_refine_ls_weighting_details
'w=1/[\s^2^(Fo^2^)+(0.0622P)^2^] where P=(Fo^2^+2Fc^2^)/3'
_atom_sites_solution_primary ?
_atom_sites_solution_secondary ?
_atom_sites_solution_hydrogens mixed
_refine_ls_hydrogen_treatment mixed
_refine_ls_extinction_method SHELXL
_refine_ls_extinction_coef 0.009(2)
_refine_ls_extinction_expression
'Fc^*=kFc[1+0.001xFc^2^/|s^3^/sin(2\q)]^-1/4^'
_refine_ls_abs_structure_details
;
Flack x determined using 1616 quotients [(I+)-(I-)]/[(I+)+(I-)]
(Parsons, Flack and Wagner, Acta Cryst. B69 (2013) 249-259).
;
_refine_ls_abs_structure_Flack -0.1(4)
_chemical_absolute_configuration syn
_refine_ls_number_reflns 7475
_refine_ls_number_parameters 319
_refine_ls_number_restraints 13
_refine_ls_R_factor_all 0.0931
_refine_ls_R_factor_gt 0.0417
_refine_ls_wR_factor_ref 0.1200
_refine_ls_wR_factor_gt 0.0976
_refine_ls_goodness_of_fit_ref 0.962
_refine_ls_restrained_S_all 0.964
_refine_ls_shift/su_max 0.027
_refine_ls_shift/su_mean 0.001

loop_
_atom_site_label
_atom_site_type_symbol
_atom_site_fract_x
_atom_site_fract_y
_atom_site_fract_z

```

```

_atom_site_U_iso_or_equiv
_atom_site_adp_type
_atom_site_occupancy
_atom_site_site_symmetry_order
_atom_site_calc_flag
_atom_site_refinement_flags_posn
_atom_site_refinement_flags_adp
_atom_site_refinement_flags_occupancy
_atom_site_disorder_assembly
_atom_site_disorder_group
O1 O 0.7612(2) 0.08422(18) 0.73189(17) 0.0524(5) Uani 1 1 d . . . . .
O2 O 0.9834(2) 0.2964(2) 0.95416(16) 0.0542(5) Uani 1 1 d . . . . .
O3 O 0.7128(2) 0.1055(2) 1.20373(17) 0.0590(6) Uani 1 1 d . . . . .
O4 O 1.0004(2) 0.2252(2) 1.45402(16) 0.0577(6) Uani 1 1 d . . . . .
O5 O 0.6807(2) 0.3791(2) 1.02669(18) 0.0592(6) Uani 1 1 d . . . . .
O6 O 0.5597(3) 0.2754(2) 0.5192(2) 0.0753(7) Uani 1 1 d . . . . .
N2 N 0.8947(2) 0.1888(2) 0.65262(18) 0.0409(5) Uani 1 1 d . . . . .
H1 H 0.9022 0.2134 0.5869 0.049 Uiso 1 1 calc R U . . .
N3 N 0.8044(2) 0.3474(2) 0.78350(18) 0.0420(5) Uani 1 1 d . . . . .
H2 H 0.7691 0.3450 0.7057 0.050 Uiso 1 1 calc R U . . .
N5 N 0.8777(3) 0.1732(2) 1.13675(18) 0.0452(6) Uani 1 1 d . . . . .
H3 H 0.8980 0.1952 1.0759 0.054 Uiso 1 1 calc R U . . .
N1 N 0.6638(2) 0.1589(2) 0.42462(19) 0.0451(5) Uani 1 1 d . . . . .
H4 H 0.6927 0.1514 0.3655 0.054 Uiso 1 1 calc R U . . .
N6 N 0.8794(3) 0.3464(2) 1.3034(2) 0.0532(6) Uani 1 1 d . . . . .
H5A H 0.8630 0.3944 1.3524 0.064 Uiso 1 1 calc R U . . .
H5B H 0.8478 0.3611 1.2271 0.064 Uiso 1 1 calc R U . . .
N4 N 0.6779(2) 0.2192(2) 0.91331(19) 0.0433(5) Uani 1 1 d . . . . .
H6 H 0.6912 0.1930 0.8505 0.052 Uiso 1 1 calc R U . . .
C1 C 0.7870(3) 0.1167(2) 0.6435(2) 0.0401(6) Uani 1 1 d . . . . .
C2 C 0.9281(3) 0.2925(2) 0.8442(2) 0.0416(6) Uani 1 1 d . . . . .
C3 C 0.7448(3) 0.1398(3) 1.1192(2) 0.0449(6) Uani 1 1 d . . . . .
C4 C 0.9527(3) 0.2505(2) 1.3452(2) 0.0434(6) Uani 1 1 d . . . . .
C5 C 0.6947(3) 0.3343(3) 0.9377(2) 0.0438(6) Uani 1 1 d . . . . .
C6 C 0.5977(4) 0.4651(3) 0.7591(3) 0.0633(9) Uani 1 1 d . . . . .
H6A H 0.6228 0.5213 0.7103 0.095 Uiso 1 1 calc R U . . .
H6B H 0.5466 0.5036 0.8022 0.095 Uiso 1 1 calc R U . . .
H6C H 0.5392 0.4053 0.7080 0.095 Uiso 1 1 calc R U . . .
C7 C 0.6379(3) 0.1364(3) 0.9895(2) 0.0487(7) Uani 1 1 d . . . . .
C8 C 0.7003(3) 0.0698(2) 0.5180(2) 0.0431(6) Uani 1 1 d . . . . .
H8 H 0.6116 0.0387 0.5208 0.052 Uiso 1 1 calc R U . . .
C9 C 0.9872(3) 0.1726(3) 1.2564(2) 0.0492(7) Uani 1 1 d . . . . .
H9 H 0.9979 0.0921 1.2873 0.059 Uiso 1 1 calc R U . . .
C10 C 1.0005(3) 0.2284(3) 0.7683(2) 0.0423(6) Uani 1 1 d . . . . .
C11 C 0.7302(3) 0.4104(2) 0.8481(2) 0.0441(6) Uani 1 1 d . . . . .
H11 H 0.7921 0.4739 0.8936 0.053 Uiso 1 1 calc R U . . .

```

C12 C 0.6458(5) 0.0116(3) 0.9429(3) 0.0733(11) Uani 1 1 d . . . . .  
 H12A H 0.5839 0.0059 0.8595 0.110 Uiso 1 1 calc R U . . .  
 H12B H 0.6170 -0.0439 0.9900 0.110 Uiso 1 1 calc R U . . .  
 H12C H 0.7413 -0.0048 0.9502 0.110 Uiso 1 1 calc R U . . .  
 C13 C 0.4890(4) 0.1637(4) 0.9848(3) 0.0781(11) Uani 1 1 d . . . . .  
 H13A H 0.4885 0.2392 1.0202 0.117 Uiso 1 1 calc R U . . .  
 H13B H 0.4605 0.1051 1.0291 0.117 Uiso 1 1 calc R U . . .  
 H13C H 0.4243 0.1640 0.9020 0.117 Uiso 1 1 calc R U . . .  
 C14 C 1.0957(3) 0.3174(3) 0.7405(3) 0.0587(8) Uani 1 1 d . . . . .  
 H14A H 1.1492 0.2792 0.6993 0.088 Uiso 1 1 calc R U . . .  
 H14B H 1.1594 0.3510 0.8146 0.088 Uiso 1 1 calc R U . . .  
 H14C H 1.0386 0.3782 0.6898 0.088 Uiso 1 1 calc R U . . .  
 C15 C 0.7764(4) -0.0300(3) 0.4850(3) 0.0577(8) Uani 1 1 d . . . . .  
 H15A H 0.7206 -0.0577 0.4053 0.087 Uiso 1 1 calc R U . . .  
 H15B H 0.7904 -0.0926 0.5423 0.087 Uiso 1 1 calc R U . . .  
 H15C H 0.8666 -0.0033 0.4864 0.087 Uiso 1 1 calc R U . . .  
 C16 C 0.5349(4) 0.3287(3) 0.3180(3) 0.0723(10) Uani 1 1 d . . . . .  
 H16A H 0.4380 0.3100 0.2707 0.108 Uiso 1 1 calc R U . . .  
 H16B H 0.5921 0.3155 0.2705 0.108 Uiso 1 1 calc R U . . .  
 H16C H 0.5417 0.4095 0.3420 0.108 Uiso 1 1 calc R U . . .  
 C17 C 0.5860(3) 0.2528(3) 0.4280(3) 0.0534(7) Uani 1 1 d . . . . .  
 C18 C 1.0872(3) 0.1259(3) 0.8400(3) 0.0601(8) Uani 1 1 d . . . . .  
 H18A H 1.0258 0.0718 0.8587 0.090 Uiso 1 1 calc R U . . .  
 H18B H 1.1575 0.1543 0.9138 0.090 Uiso 1 1 calc R U . . .  
 H18C H 1.1330 0.0870 0.7928 0.090 Uiso 1 1 calc R U . . .  
 C19 C 1.1276(3) 0.2106(4) 1.2495(3) 0.0737(10) Uani 1 1 d . . . . .  
 H19A H 1.1518 0.1590 1.1964 0.111 Uiso 1 1 calc R U . . .  
 H19B H 1.2004 0.2076 1.3289 0.111 Uiso 1 1 calc R U . . .  
 H19C H 1.1192 0.2892 1.2190 0.111 Uiso 1 1 calc R U . . .  
 OW1 O 1.1732(3) 0.0241(3) 1.5426(3) 0.1088(11) Uani 1 1 d D . . . . .  
 HW1 H 1.258(3) 0.068(5) 1.582(5) 0.163 Uiso 1 1 d D U . . .  
 HW2 H 1.106(4) 0.077(4) 1.496(5) 0.163 Uiso 1 1 d D U . . .  
 OW2 O 0.4230(4) 0.1502(5) 0.6390(3) 0.1388(16) Uani 1 1 d D . . . . .  
 HW3 H 0.433(8) 0.197(6) 0.579(4) 0.208 Uiso 1 1 d D U . . .  
 HW4 H 0.469(7) 0.183(6) 0.716(3) 0.208 Uiso 1 1 d D U . . .

loop\_

\_atom\_site\_aniso\_label  
 \_atom\_site\_aniso\_U\_11  
 \_atom\_site\_aniso\_U\_22  
 \_atom\_site\_aniso\_U\_33  
 \_atom\_site\_aniso\_U\_23  
 \_atom\_site\_aniso\_U\_13  
 \_atom\_site\_aniso\_U\_12

O1 0.0691(13) 0.0542(13) 0.0394(10) 0.0012(9) 0.0265(9) -0.0092(10)  
 O2 0.0513(11) 0.0750(14) 0.0319(10) -0.0035(9) 0.0103(8) -0.0011(10)

O3 0.0817(15) 0.0637(14) 0.0375(10) -0.0014(9) 0.0290(10) -0.0169(11)  
O4 0.0668(13) 0.0719(14) 0.0334(10) 0.0028(10) 0.0173(9) -0.0051(12)  
O5 0.0783(15) 0.0598(13) 0.0495(11) -0.0059(10) 0.0353(11) 0.0093(11)  
O6 0.0969(18) 0.0729(16) 0.0681(15) 0.0054(12) 0.0445(14) 0.0271(14)  
N2 0.0467(12) 0.0461(13) 0.0307(10) 0.0009(9) 0.0152(9) -0.0024(10)  
N3 0.0498(13) 0.0459(13) 0.0309(10) 0.0016(10) 0.0158(10) 0.0028(11)  
N5 0.0564(14) 0.0481(14) 0.0302(10) -0.0019(10) 0.0148(10) -0.0022(11)  
N1 0.0487(13) 0.0516(14) 0.0335(11) 0.0004(10) 0.0136(10) 0.0036(11)  
N6 0.0727(17) 0.0465(14) 0.0408(12) -0.0040(11) 0.0213(12) 0.0042(13)  
N4 0.0541(14) 0.0456(13) 0.0329(11) -0.0042(10) 0.0191(10) -0.0078(11)  
C1 0.0472(15) 0.0392(14) 0.0351(12) 0.0013(11) 0.0164(11) 0.0012(12)  
C2 0.0461(15) 0.0434(15) 0.0352(13) 0.0005(11) 0.0149(12) -0.0029(12)  
C3 0.0617(17) 0.0411(15) 0.0349(13) -0.0043(11) 0.0216(12) -0.0062(13)  
C4 0.0498(16) 0.0461(16) 0.0342(13) 0.0003(12) 0.0153(12) -0.0084(13)  
C5 0.0466(15) 0.0457(16) 0.0394(14) 0.0008(12) 0.0162(12) 0.0045(13)  
C6 0.072(2) 0.063(2) 0.0540(18) 0.0080(16) 0.0233(16) 0.0256(18)  
C7 0.0604(17) 0.0531(17) 0.0347(13) -0.0009(12) 0.0200(12) -0.0176(15)  
C8 0.0438(15) 0.0437(16) 0.0400(14) -0.0028(12) 0.0135(12) -0.0027(12)  
C9 0.0603(18) 0.0449(16) 0.0356(13) 0.0001(12) 0.0098(12) 0.0083(14)  
C10 0.0426(14) 0.0494(16) 0.0335(13) -0.0005(12) 0.0124(11) -0.0018(12)  
C11 0.0549(17) 0.0392(15) 0.0394(14) -0.0011(12) 0.0190(13) 0.0026(13)  
C12 0.119(3) 0.055(2) 0.0442(17) -0.0099(15) 0.0282(19) -0.032(2)  
C13 0.059(2) 0.115(3) 0.063(2) 0.013(2) 0.0249(16) -0.017(2)  
C14 0.0536(17) 0.070(2) 0.0565(18) -0.0113(16) 0.0252(15) -0.0174(16)  
C15 0.0621(19) 0.0533(18) 0.0522(17) -0.0097(14) 0.0144(15) 0.0089(15)  
C16 0.078(2) 0.068(2) 0.066(2) 0.0222(19) 0.0220(19) 0.0155(19)  
C17 0.0572(18) 0.0543(19) 0.0471(17) 0.0030(14) 0.0175(14) 0.0052(15)  
C18 0.0579(18) 0.064(2) 0.0502(16) 0.0038(15) 0.0108(14) 0.0132(16)  
C19 0.0526(19) 0.111(3) 0.0540(19) -0.016(2) 0.0160(15) 0.011(2)  
OW1 0.087(2) 0.113(3) 0.117(3) 0.060(2) 0.0260(19) 0.0004(18)  
OW2 0.128(3) 0.173(4) 0.110(3) 0.012(3) 0.037(2) -0.059(3)

\_geom\_special\_details

;

All esds (except the esd in the dihedral angle between two l.s. planes) are estimated using the full covariance matrix. The cell esds are taken into account individually in the estimation of esds in distances, angles and torsion angles; correlations between esds in cell parameters are only used when they are defined by crystal symmetry. An approximate (isotropic) treatment of cell esds is used for estimating esds involving l.s. planes.

;

loop\_

\_geom\_bond\_atom\_site\_label\_1

\_geom\_bond\_atom\_site\_label\_2

\_geom\_bond\_distance

\_geom\_bond\_site\_symmetry\_2

\_geom\_bond\_publ\_flag

O1 C1 1.231(3) . ?  
O2 C2 1.219(3) . ?  
O3 C3 1.229(3) . ?  
O4 C4 1.237(3) . ?  
O5 C5 1.230(3) . ?  
O6 C17 1.236(4) . ?  
N2 C1 1.341(3) . ?  
N2 C10 1.469(3) . ?  
N2 H1 0.8600 . ?  
N3 C2 1.350(4) . ?  
N3 C11 1.450(3) . ?  
N3 H2 0.8600 . ?  
N5 C3 1.342(4) . ?  
N5 C9 1.447(3) . ?  
N5 H3 0.8600 . ?  
N1 C17 1.340(4) . ?  
N1 C8 1.450(4) . ?  
N1 H4 0.8600 . ?  
N6 C4 1.313(4) . ?  
N6 H5A 0.8600 . ?  
N6 H5B 0.8600 . ?  
N4 C5 1.342(4) . ?  
N4 C7 1.467(4) . ?  
N4 H6 0.8600 . ?  
C1 C8 1.522(4) . ?  
C2 C10 1.542(4) . ?  
C3 C7 1.523(4) . ?  
C4 C9 1.516(4) . ?  
C5 C11 1.518(4) . ?  
C6 C11 1.506(4) . ?  
C6 H6A 0.9600 . ?  
C6 H6B 0.9600 . ?  
C6 H6C 0.9600 . ?  
C7 C13 1.524(5) . ?  
C7 C12 1.541(5) . ?  
C8 C15 1.507(4) . ?  
C8 H8 0.9800 . ?  
C9 C19 1.521(5) . ?  
C9 H9 0.9800 . ?  
C10 C18 1.522(4) . ?  
C10 C14 1.521(4) . ?  
C11 H11 0.9800 . ?  
C12 H12A 0.9600 . ?  
C12 H12B 0.9600 . ?

C12 H12C 0.9600 . ?  
C13 H13A 0.9600 . ?  
C13 H13B 0.9600 . ?  
C13 H13C 0.9600 . ?  
C14 H14A 0.9600 . ?  
C14 H14B 0.9600 . ?  
C14 H14C 0.9600 . ?  
C15 H15A 0.9600 . ?  
C15 H15B 0.9600 . ?  
C15 H15C 0.9600 . ?  
C16 C17 1.493(5) . ?  
C16 H16A 0.9600 . ?  
C16 H16B 0.9600 . ?  
C16 H16C 0.9600 . ?  
C18 H18A 0.9600 . ?  
C18 H18B 0.9600 . ?  
C18 H18C 0.9600 . ?  
C19 H19A 0.9600 . ?  
C19 H19B 0.9600 . ?  
C19 H19C 0.9600 . ?  
OW1 HW1 0.955(19) . ?  
OW1 HW2 0.924(19) . ?  
OW2 HW3 0.931(19) . ?  
OW2 HW4 0.936(19) . ?

loop\_

\_geom\_angle\_atom\_site\_label\_1  
\_geom\_angle\_atom\_site\_label\_2  
\_geom\_angle\_atom\_site\_label\_3  
\_geom\_angle  
\_geom\_angle\_site\_symmetry\_1  
\_geom\_angle\_site\_symmetry\_3  
\_geom\_angle\_publ\_flag  
C1 N2 C10 123.9(2) . . ?  
C1 N2 H1 118.1 . . ?  
C10 N2 H1 118.1 . . ?  
C2 N3 C11 120.7(2) . . ?  
C2 N3 H2 119.6 . . ?  
C11 N3 H2 119.6 . . ?  
C3 N5 C9 121.0(2) . . ?  
C3 N5 H3 119.5 . . ?  
C9 N5 H3 119.5 . . ?  
C17 N1 C8 121.6(2) . . ?  
C17 N1 H4 119.2 . . ?  
C8 N1 H4 119.2 . . ?  
C4 N6 H5A 120.0 . . ?

C4 N6 H5B 120.0 . . ?  
H5A N6 H5B 120.0 . . ?  
C5 N4 C7 122.6(2) . . ?  
C5 N4 H6 118.7 . . ?  
C7 N4 H6 118.7 . . ?  
O1 C1 N2 122.7(2) . . ?  
O1 C1 C8 120.1(2) . . ?  
N22 C1 C8 117.1(2) . . ?  
O2 C2 N3 121.6(3) . . ?  
O2 C2 C10 121.0(2) . . ?  
N3 C2 C10 117.3(2) . . ?  
O3 C3 N5 121.2(3) . . ?  
O3 C3 C7 121.0(2) . . ?  
N5 C3 C7 117.6(2) . . ?  
O4 C4 N6 122.5(3) . . ?  
O4 C4 C9 119.3(3) . . ?  
N6 C4 C9 118.1(2) . . ?  
O5 C5 N4 123.2(3) . . ?  
O5 C5 C11 119.9(3) . . ?  
N4 C5 C11 116.9(2) . . ?  
C11 C6 H6A 109.5 . . ?  
C11 C6 H6B 109.5 . . ?  
H6A C6 H6B 109.5 . . ?  
C11 C6 H6C 109.5 . . ?  
H6A C6 H6C 109.5 . . ?  
H6B C6 H6C 109.5 . . ?  
N4 C7 C13 110.1(3) . . ?  
N4 C7 C3 110.6(2) . . ?  
C13 C7 C3 111.0(3) . . ?  
N4 C7 C12 108.1(2) . . ?  
C13 C7 C12 111.0(3) . . ?  
C3 C7 C12 106.0(3) . . ?  
N1 C8 C15 110.0(2) . . ?  
N1 C8 C1 113.3(2) . . ?  
C15 C8 C1 110.8(2) . . ?  
N1 C8 H8 107.5 . . ?  
C15 C8 H8 107.5 . . ?  
C1 C8 H8 107.5 . . ?  
N5 C9 C4 113.0(2) . . ?  
N5 C9 C19 109.9(2) . . ?  
C4 C9 C19 109.4(3) . . ?  
N5 C9 H9 108.1 . . ?  
C4 C9 H9 108.1 . . ?  
C19 C9 H9 108.1 . . ?  
N2 C10 C18 111.1(2) . . ?  
N2 C10 C14 107.8(2) . . ?

C18 C10 C14 110.6(3) . . ?  
N2 C10 C2 110.6(2) . . ?  
C18 C10 C2 109.8(2) . . ?  
C14 C10 C2 106.8(2) . . ?  
N3 C11 C6 109.7(2) . . ?  
N3 C11 C5 113.1(2) . . ?  
C6 C11 C5 110.3(2) . . ?  
N3 C11 H11 107.8 . . ?  
C6 C11 H11 107.8 . . ?  
C5 C11 H11 107.8 . . ?  
C7 C12 H12A 109.5 . . ?  
C7 C12 H12B 109.5 . . ?  
H12A C12 H12B 109.5 . . ?  
C7 C12 H12C 109.5 . . ?  
H12A C12 H12C 109.5 . . ?  
H12B C12 H12C 109.5 . . ?  
C7 C13 H13A 109.5 . . ?  
C7 C13 H13B 109.5 . . ?  
H13A C13 H13B 109.5 . . ?  
C7 C13 H13C 109.5 . . ?  
H13A C13 H13C 109.5 . . ?  
H13B C13 H13C 109.5 . . ?  
C10 C14 H14A 109.5 . . ?  
C10 C14 H14B 109.5 . . ?  
H14A C14 H14B 109.5 . . ?  
C10 C14 H14C 109.5 . . ?  
H14A C14 H14C 109.5 . . ?  
H14B C14 H14C 109.5 . . ?  
C8 C15 H15A 109.5 . . ?  
C8 C15 H15B 109.5 . . ?  
H15A C15 H15B 109.5 . . ?  
C8 C15 H15C 109.5 . . ?  
H15A C15 H15C 109.5 . . ?  
H15B C15 H15C 109.5 . . ?  
C17 C16 H16A 109.5 . . ?  
C17 C16 H16B 109.5 . . ?  
H16A C16 H16B 109.5 . . ?  
C17 C16 H16C 109.5 . . ?  
H16A C16 H16C 109.5 . . ?  
H16B C16 H16C 109.5 . . ?  
O6 C17 N1 120.9(3) . . ?  
O6 C17 C16 122.0(3) . . ?  
N1 C17 C16 117.1(3) . . ?  
C10 C18 H18A 109.5 . . ?  
C10 C18 H18B 109.5 . . ?  
H18A C18 H18B 109.5 . . ?



C10 C18 H18C 109.5 . . ?  
H18A C18 H18C 109.5 . . ?  
H18B C18 H18C 109.5 . . ?  
C9 C19 H19A 109.5 . . ?  
C9 C19 H19B 109.5 . . ?  
H19A C19 H19B 109.5 . . ?  
C9 C19 H19C 109.5 . . ?  
H19A C19 H19C 109.5 . . ?  
H19B C19 H19C 109.5 . . ?  
HW1 OW1 HW2 107(3) . . ?  
HW3 OW2 HW4 112(5) . . ?

loop\_

\_geom\_torsion\_atom\_site\_label\_1  
\_geom\_torsion\_atom\_site\_label\_2  
\_geom\_torsion\_atom\_site\_label\_3  
\_geom\_torsion\_atom\_site\_label\_4  
\_geom\_torsion  
\_geom\_torsion\_site\_symmetry\_1  
\_geom\_torsion\_site\_symmetry\_2  
\_geom\_torsion\_site\_symmetry\_3  
\_geom\_torsion\_site\_symmetry\_4  
\_geom\_torsion\_publ\_flag  
C10 N2 C1 O1 5.7(4) . . . . ?  
C10 N2 C1 C8 -171.0(2) . . . . ?  
C11 N3 C2 O2 -2.0(4) . . . . ?  
C11 N3 C2 C10 -179.5(2) . . . . ?  
C9 N5 C3 O3 -1.6(4) . . . . ?  
C9 N5 C3 C7 -176.6(3) . . . . ?  
C7 N4 C5 O5 1.5(4) . . . . ?  
C7 N4 C5 C11 -177.5(2) . . . . ?  
C5 N4 C7 C13 65.2(4) . . . . ?  
C5 N4 C7 C3 -57.9(4) . . . . ?  
C5 N4 C7 C12 -173.5(3) . . . . ?  
O3 C3 C7 N4 158.5(3) . . . . ?  
N5 C3 C7 N4 -26.4(4) . . . . ?  
O3 C3 C7 C13 36.0(4) . . . . ?  
N5 C3 C7 C13 -148.9(3) . . . . ?  
O3 C3 C7 C12 -84.6(3) . . . . ?  
N5 C3 C7 C12 90.5(3) . . . . ?  
C17 N1 C8 C15 174.9(3) . . . . ?  
C17 N1 C8 C1 -60.6(3) . . . . ?  
O1 C1 C8 N1 138.2(3) . . . . ?  
N2 C1 C8 N1 -45.0(3) . . . . ?  
O1 C1 C8 C15 -97.7(3) . . . . ?  
N2 C1 C8 C15 79.1(3) . . . . ?

C3 N5 C9 C4 -59.2(3) . . . . ?  
 C3 N5 C9 C19 178.3(3) . . . . ?  
 O4 C4 C9 N5 150.8(3) . . . . ?  
 N6 C4 C9 N5 -33.1(4) . . . . ?  
 O4 C4 C9 C19 -86.3(3) . . . . ?  
 N6 C4 C9 C19 89.8(3) . . . . ?  
 C1 N2 C10 C18 63.8(3) . . . . ?  
 C1 N2 C10 C14 -174.8(3) . . . . ?  
 C1 N2 C10 C2 -58.4(3) . . . . ?  
 O2 C2 C10 N2 154.2(3) . . . . ?  
 N3 C2 C10 N2 -28.2(3) . . . . ?  
 O2 C2 C10 C18 31.3(4) . . . . ?  
 N3 C2 C10 C18 -151.2(3) . . . . ?  
 O2 C2 C10 C14 -88.8(3) . . . . ?  
 N3 C2 C10 C14 88.8(3) . . . . ?  
 C2 N3 C11 C6 178.8(3) . . . . ?  
 C2 N3 C11 C5 -57.5(3) . . . . ?  
 O5 C5 C11 N3 153.6(3) . . . . ?  
 N4 C5 C11 N3 -27.4(3) . . . . ?  
 O5 C5 C11 C6 -83.0(3) . . . . ?  
 N4 C5 C11 C6 96.0(3) . . . . ?  
 C8 N1 C17 O6 10.4(4) . . . . ?  
 C8 N1 C17 C16 -170.3(3) . . . . ?

loop\_

\_geom\_hbond\_atom\_site\_label\_D  
 \_geom\_hbond\_atom\_site\_label\_H  
 \_geom\_hbond\_atom\_site\_label\_A  
 \_geom\_hbond\_distance\_DH  
 \_geom\_hbond\_distance\_HA  
 \_geom\_hbond\_distance\_DA  
 \_geom\_hbond\_angle\_DHA  
 \_geom\_hbond\_site\_symmetry\_A  
 N2 H1 O4 0.86 2.16 2.962(3) 154.8 1\_554  
 N3 H2 O6 0.86 2.57 3.309(4) 145.2 .  
 N5 H3 O2 0.86 2.26 3.093(3) 163.0 .  
 N1 H4 O3 0.86 2.08 2.912(3) 164.3 1\_554  
 N6 H5A OW1 0.86 2.05 2.911(4) 173.5 2\_758  
 N6 H5B O5 0.86 2.37 3.182(3) 158.0 .  
 N4 H6 O1 0.86 2.19 3.015(3) 161.9 .  
 C13 H13A O5 0.96 2.50 3.060(5) 117.1 .  
 C18 H18A O1 0.96 2.55 3.114(4) 117.4 .  
 OW1 HW1 OW2 0.955(19) 1.82(2) 2.770(5) 173(6) 1\_656  
 OW1 HW2 O4 0.924(19) 1.97(3) 2.844(4) 158(5) .  
 OW2 HW3 O6 0.931(19) 1.90(4) 2.731(5) 147(6) .  
 OW2 HW4 N4 0.936(19) 2.55(4) 3.423(4) 155(6) .

\_refine\_diff\_density\_max 0.163  
\_refine\_diff\_density\_min -0.214  
\_refine\_diff\_density\_rms 0.035

\_shelxl\_version\_number 2014/6

\_shelx\_res\_file

;

TITL compound 7

CELL 0.71073 10.1561 11.4127 11.8880 90.000 111.692 90.000

ZERR 2.00 0.0020 0.0023 0.0024 0.000 0.030 0.000

LATT -1

SYMM -X, 0.5+Y, -Z

SFAC C H N O

UNIT 38 76 12 16

OMIT -3. 60.

ACTA

L.S. 8

BOND\$H

MERG 2

LIST 4

EQIV \$1 x, y, z-1

HTAB N22 O4\_\$1

HTAB N3 O6

HTAB N5 O2

HTAB N1 O3\_\$1

EQIV \$2 -x+2, y+1/2, -z+3

HTAB N6 OW1\_\$2

HTAB N6 O5

HTAB N4 O1

HTAB C13 O5

HTAB C18 O1

EQIV \$3 x+1, y, z+1

HTAB OW1 OW2\_\$3

HTAB OW1 O4

HTAB OW2 O6

HTAB OW2 N6

CONF

FMAP 2

PLAN 20

WGHT 0.062200

EXTI 0.009052

FVAR 0.28393

O1 4 0.761167 0.084216 0.731895 11.00000 0.06906 0.05425 =  
0.03936 0.00125 0.02647 -0.00924

O2 4 0.983409 0.296421 0.954160 11.00000 0.05133 0.07496 =  
0.03189 -0.00351 0.01028 -0.00110  
O3 4 0.712764 0.105452 1.203733 11.00000 0.08169 0.06374 =  
0.03752 -0.00143 0.02896 -0.01687  
O4 4 1.000413 0.225191 1.454017 11.00000 0.06677 0.07193 =  
0.03343 0.00276 0.01732 -0.00514  
O5 4 0.680664 0.379128 1.026688 11.00000 0.07834 0.05983 =  
0.04946 -0.00591 0.03529 0.00931  
O6 4 0.559730 0.275405 0.519250 11.00000 0.09687 0.07289 =  
0.06809 0.00540 0.04454 0.02706  
N22 3 0.894671 0.188839 0.652620 11.00000 0.04668 0.04613 =  
0.03068 0.00089 0.01521 -0.00237  
AFIX 43  
H1 2 0.902212 0.213409 0.586876 11.00000 -1.20000  
AFIX 0  
N3 3 0.804380 0.347422 0.783502 11.00000 0.04985 0.04593 =  
0.03089 0.00156 0.01576 0.00278  
AFIX 43  
H2 2 0.769150 0.345016 0.705700 11.00000 -1.20000  
AFIX 0  
N5 3 0.877682 0.173156 1.136747 11.00000 0.05639 0.04807 =  
0.03025 -0.00193 0.01485 -0.00218  
AFIX 43  
H3 2 0.897997 0.195198 1.075890 11.00000 -1.20000  
AFIX 0  
N1 3 0.663765 0.158913 0.424623 11.00000 0.04874 0.05165 =  
0.03347 0.00041 0.01359 0.00357  
AFIX 43  
H4 2 0.692693 0.151378 0.365540 11.00000 -1.20000  
AFIX 0  
N6 3 0.879413 0.346375 1.303417 11.00000 0.07267 0.04646 =  
0.04081 -0.00401 0.02126 0.00416  
AFIX 93  
H5A 2 0.863039 0.394436 1.352427 11.00000 -1.20000  
H5B 2 0.847824 0.361118 1.227078 11.00000 -1.20000  
AFIX 0  
N4 3 0.677918 0.219248 0.913311 11.00000 0.05410 0.04560 =  
0.03288 -0.00421 0.01906 -0.00784  
AFIX 43  
H6 2 0.691172 0.193020 0.850499 11.00000 -1.20000  
AFIX 0  
C1 1 0.787033 0.116675 0.643495 11.00000 0.04718 0.03919 =  
0.03509 0.00133 0.01640 0.00121  
C2 1 0.928143 0.292467 0.844150 11.00000 0.04611 0.04339 =  
0.03515 0.00051 0.01487 -0.00293  
C3 1 0.744788 0.139805 1.119229 11.00000 0.06173 0.04114 =

0.03490 -0.00430 0.02161 -0.00621  
 C4 1 0.952662 0.250459 1.345154 11.00000 0.04978 0.04613 =  
 0.03423 0.00026 0.01535 -0.00844  
 C5 1 0.694683 0.334295 0.937712 11.00000 0.04659 0.04568 =  
 0.03937 0.00083 0.01619 0.00449  
 C6 1 0.597680 0.465125 0.759090 11.00000 0.07249 0.06344 =  
 0.05401 0.00801 0.02330 0.02557  
 AFIX 137  
 H6A 2 0.622771 0.521312 0.710313 11.00000 -1.50000  
 H6B 2 0.546613 0.503625 0.802224 11.00000 -1.50000  
 H6C 2 0.539173 0.405290 0.707990 11.00000 -1.50000  
 AFIX 0  
 C7 1 0.637879 0.136441 0.989535 11.00000 0.06042 0.05312 =  
 0.03469 -0.00092 0.02004 -0.01760  
 C8 1 0.700290 0.069759 0.518043 11.00000 0.04380 0.04374 =  
 0.03997 -0.00283 0.01352 -0.00272  
 AFIX 13  
 H8 2 0.611565 0.038679 0.520765 11.00000 -1.20000  
 AFIX 0  
 C9 1 0.987223 0.172576 1.256450 11.00000 0.06032 0.04488 =  
 0.03561 0.00009 0.00978 0.00831  
 AFIX 13  
 H9 2 0.997919 0.092105 1.287313 11.00000 -1.20000  
 AFIX 0  
 C10 1 1.000490 0.228409 0.768324 11.00000 0.04263 0.04936 =  
 0.03346 -0.00053 0.01237 -0.00182  
 C11 1 0.730240 0.410441 0.848121 11.00000 0.05487 0.03923 =  
 0.03943 -0.00112 0.01898 0.00265  
 AFIX 13  
 H11 2 0.792131 0.473874 0.893616 11.00000 -1.20000  
 AFIX 0  
 C12 1 0.645759 0.011648 0.942920 11.00000 0.11854 0.05543 =  
 0.04421 -0.00988 0.02819 -0.03227  
 AFIX 137  
 H12A 2 0.583938 0.005919 0.859504 11.00000 -1.50000  
 H12B 2 0.616973 -0.043910 0.989992 11.00000 -1.50000  
 H12C 2 0.741277 -0.004808 0.950225 11.00000 -1.50000  
 AFIX 0  
 C13 1 0.489045 0.163704 0.984752 11.00000 0.05898 0.11476 =  
 0.06269 0.01292 0.02490 -0.01730  
 AFIX 137  
 H13A 2 0.488508 0.239213 1.020167 11.00000 -1.50000  
 H13B 2 0.460546 0.105074 1.029056 11.00000 -1.50000  
 H13C 2 0.424304 0.164004 0.902020 11.00000 -1.50000  
 AFIX 0  
 C14 1 1.095712 0.317412 0.740455 11.00000 0.05364 0.07016 =

0.05651 -0.01126 0.02517 -0.01736  
 AFIX 137  
 H14A 2 1.149235 0.279230 0.699283 11.00000 -1.50000  
 H14B 2 1.159416 0.350996 0.814648 11.00000 -1.50000  
 H14C 2 1.038584 0.378183 0.689843 11.00000 -1.50000  
 AFIX 0  
 C15 1 0.776366 -0.030014 0.485010 11.00000 0.06210 0.05326 =  
 0.05217 -0.00967 0.01444 0.00893  
 AFIX 137  
 H15A 2 0.720552 -0.057727 0.405335 11.00000 -1.50000  
 H15B 2 0.790420 -0.092574 0.542264 11.00000 -1.50000  
 H15C 2 0.866576 -0.003284 0.486393 11.00000 -1.50000  
 AFIX 0  
 C16 1 0.534877 0.328730 0.317990 11.00000 0.07849 0.06838 =  
 0.06598 0.02223 0.02202 0.01550  
 AFIX 137  
 H16A 2 0.437954 0.310011 0.270694 11.00000 -1.50000  
 H16B 2 0.592119 0.315483 0.270532 11.00000 -1.50000  
 H16C 2 0.541676 0.409510 0.342000 11.00000 -1.50000  
 AFIX 0  
 C17 1 0.586030 0.252793 0.428043 11.00000 0.05715 0.05426 =  
 0.04712 0.00302 0.01747 0.00525  
 C18 1 1.087189 0.125923 0.840044 11.00000 0.05791 0.06423 =  
 0.05019 0.00379 0.01079 0.01316  
 AFIX 137  
 H18A 2 1.025804 0.071797 0.858695 11.00000 -1.50000  
 H18B 2 1.157487 0.154334 0.913848 11.00000 -1.50000  
 H18C 2 1.132975 0.086980 0.792838 11.00000 -1.50000  
 AFIX 0  
 C19 1 1.127616 0.210602 1.249542 11.00000 0.05260 0.11143 =  
 0.05401 -0.01578 0.01600 0.01080  
 AFIX 137  
 H19A 2 1.151803 0.158966 1.196392 11.00000 -1.50000  
 H19B 2 1.200386 0.207600 1.328876 11.00000 -1.50000  
 H19C 2 1.119246 0.289235 1.218999 11.00000 -1.50000  
 AFIX 0  
 SADI OW1 HW1 OW1 HW2 OW2 HW3 OW2 HW4  
 DFIX 0.900 0.02 OW1 HW1 OW1 HW2 OW2 HW3 OW2 HW4  
 DANG 1.550 0.02 HW1 HW2  
 DANG 1.350 0.04 HW3 HW4  
 OW1 4 1.173199 0.024085 1.542626 11.00000 0.08656 0.11270 =  
 0.11709 0.06021 0.02599 0.00044  
 HW1 2 1.257711 0.068155 1.582083 11.00000 -1.50000  
 HW2 2 1.105709 0.076660 1.496218 11.00000 -1.50000  
 OW2 4 0.422983 0.150213 0.639015 11.00000 0.12767 0.17282 =  
 0.10972 0.01236 0.03675 -0.05946

HW3 2 0.433137 0.197434 0.578893 11.00000 -1.50000  
HW4 2 0.468862 0.182505 0.716014 11.00000 -1.50000  
HKLF 4

REM sad1 in P2(1)

REM R1 = 0.0417 for 4289 Fo > 4sig(Fo) and 0.0931 for all 7475 data

REM 319 parameters refined using 13 restraints

END

WGHT 0.0636 0.0000

REM Highest difference peak 0.163, deepest hole -0.214, 1-sigma level 0.035

Q1 1 0.4755 0.2165 0.4789 11.00000 0.05 0.16  
Q2 1 0.4306 0.3828 0.3259 11.00000 0.05 0.15  
Q3 1 0.7776 0.0993 0.3224 11.00000 0.05 0.15  
Q4 1 0.6847 0.2402 1.1919 11.00000 0.05 0.14  
Q5 1 0.8626 0.1194 0.8227 11.00000 0.05 0.13  
Q6 1 0.8508 0.4560 0.9363 11.00000 0.05 0.13  
Q7 1 0.7415 0.2258 0.7395 11.00000 0.05 0.13  
Q8 1 0.7649 0.2164 0.4485 11.00000 0.05 0.13  
Q9 1 0.8676 0.1770 0.7837 11.00000 0.05 0.13  
Q10 1 0.7903 0.2795 0.5336 11.00000 0.05 0.12  
Q11 1 0.7701 0.0964 1.2314 11.00000 0.05 0.12  
Q12 1 0.8259 0.1931 0.7207 11.00000 0.05 0.12  
Q13 1 0.4985 0.2143 0.5639 11.00000 0.05 0.12  
Q14 1 0.7925 0.2624 1.3144 11.00000 0.05 0.12  
Q15 1 0.8419 0.1397 1.2954 11.00000 0.05 0.12  
Q16 1 0.6758 -0.0571 1.0188 11.00000 0.05 0.12  
Q17 1 0.7084 0.3139 0.6934 11.00000 0.05 0.12  
Q18 1 0.6399 0.4124 0.3323 11.00000 0.05 0.12  
Q19 1 0.3600 0.0331 0.7804 11.00000 0.05 0.11  
Q20 1 0.5976 0.0637 0.6978 11.00000 0.05 0.11

;

\_shelx\_res\_checksum 72766

\_shelx\_hkl\_file

;

1 0 0 76.03 1.43  
1 0 0 76.15 1.53  
-1 0 0 77.00 1.52  
-1 0 0 73.53 1.66  
-2 0 0 0.43 0.13  
2 0 0 0.42 0.13  
2 0 0 0.49 0.14  
-2 0 0 0.55 0.11

|     |   |   |       |      |
|-----|---|---|-------|------|
| 2   | 0 | 0 | 0.44  | 0.07 |
| -3  | 0 | 0 | 57.73 | 1.44 |
| 3   | 0 | 0 | 57.54 | 1.31 |
| 3   | 0 | 0 | 57.88 | 1.14 |
| 3   | 0 | 0 | 57.00 | 1.22 |
| 3   | 0 | 0 | 56.31 | 1.43 |
| -3  | 0 | 0 | 59.79 | 1.28 |
| -4  | 0 | 0 | 5.88  | 0.32 |
| 4   | 0 | 0 | 6.38  | 0.37 |
| 4   | 0 | 0 | 6.31  | 0.42 |
| 4   | 0 | 0 | 6.42  | 0.24 |
| -4  | 0 | 0 | 6.63  | 0.42 |
| 4   | 0 | 0 | 6.24  | 0.31 |
| 5   | 0 | 0 | 3.66  | 0.34 |
| 5   | 0 | 0 | 3.52  | 0.37 |
| 5   | 0 | 0 | 4.02  | 0.22 |
| -5  | 0 | 0 | 3.72  | 0.30 |
| -5  | 0 | 0 | 3.55  | 0.29 |
| -5  | 0 | 0 | 3.64  | 0.38 |
| 5   | 0 | 0 | 3.77  | 0.30 |
| -6  | 0 | 0 | 2.59  | 0.28 |
| -6  | 0 | 0 | 1.81  | 0.29 |
| 6   | 0 | 0 | 1.55  | 0.35 |
| 6   | 0 | 0 | 2.13  | 0.35 |
| 6   | 0 | 0 | 2.37  | 0.21 |
| -6  | 0 | 0 | 2.27  | 0.39 |
| -7  | 0 | 0 | 9.09  | 0.71 |
| 7   | 0 | 0 | 10.56 | 0.71 |
| -7  | 0 | 0 | 8.75  | 0.56 |
| 7   | 0 | 0 | 9.83  | 0.38 |
| -7  | 0 | 0 | 9.56  | 0.48 |
| 7   | 0 | 0 | 10.37 | 0.64 |
| -8  | 0 | 0 | 0.67  | 0.29 |
| -8  | 0 | 0 | 0.84  | 0.31 |
| 8   | 0 | 0 | 0.36  | 0.38 |
| 9   | 0 | 0 | 11.90 | 0.70 |
| -9  | 0 | 0 | 11.53 | 0.65 |
| -9  | 0 | 0 | 11.78 | 0.60 |
| 10  | 0 | 0 | 5.89  | 0.61 |
| -10 | 0 | 0 | 5.28  | 0.55 |
| -11 | 0 | 0 | -0.65 | 0.32 |
| 11  | 0 | 0 | -0.08 | 0.40 |
| -12 | 0 | 0 | 0.15  | 0.36 |
| 12  | 0 | 0 | 0.29  | 0.47 |
| 13  | 0 | 0 | 0.71  | 0.53 |
| -13 | 0 | 0 | 0.03  | 0.43 |



0 -1 0 -0.94 0.05  
0 -1 0 -0.95 0.05  
0 -1 0 -0.75 0.05  
0 -1 0 -0.85 0.06  
0 1 0 -0.83 0.05  
1 -1 0 986.04 19.27  
-1 -1 0 953.93 20.64  
-1 -1 0 975.99 19.31  
1 -1 0 961.81 19.43  
1 -1 0 950.10 20.72  
-1 -1 0 944.36 18.96  
-1 1 0 960.21 17.89  
-1 1 0 964.40 19.06  
-1 1 0 947.84 20.68  
1 1 0 982.31 19.41  
1 1 0 953.27 20.66  
1 1 0 984.94 18.04  
2 -1 0 88.20 2.02  
-2 -1 0 88.15 2.01  
-2 -1 0 87.73 1.82  
2 -1 0 90.11 1.83  
2 -1 0 86.09 1.87  
2 1 0 88.85 2.01  
2 1 0 90.38 1.87  
-2 1 0 91.22 1.84  
-2 1 0 88.21 1.67  
3 -1 0 103.16 2.15  
3 -1 0 103.97 2.41  
-3 -1 0 105.09 2.16  
-3 -1 0 104.05 2.40  
3 -1 0 100.30 2.22  
-3 1 0 104.02 1.97  
3 1 0 105.22 2.05  
3 1 0 102.08 2.38  
-3 1 0 104.81 2.41  
-3 1 0 100.89 2.18  
3 1 0 105.38 2.21  
4 -1 0 116.71 2.23  
4 -1 0 113.70 2.44  
-4 -1 0 117.10 2.46  
4 -1 0 114.91 2.74  
-4 -1 0 117.64 2.73  
4 -1 0 113.56 2.52  
-4 1 0 119.50 2.49  
4 1 0 115.42 2.27  
4 1 0 120.33 2.73

|    |    |   |        |      |
|----|----|---|--------|------|
| 4  | 1  | 0 | 116.53 | 2.52 |
| -4 | 1  | 0 | 114.16 | 2.74 |
| 5  | -1 | 0 | 7.85   | 0.43 |
| 5  | -1 | 0 | 7.59   | 0.27 |
| -5 | -1 | 0 | 8.12   | 0.41 |
| -5 | -1 | 0 | 7.90   | 0.52 |
| 5  | -1 | 0 | 7.81   | 0.53 |
| 5  | -1 | 0 | 8.05   | 0.36 |
| -5 | 1  | 0 | 7.78   | 0.52 |
| 5  | 1  | 0 | 8.30   | 0.51 |
| 5  | 1  | 0 | 7.69   | 0.30 |
| -5 | 1  | 0 | 7.08   | 0.39 |
| 5  | 1  | 0 | 8.19   | 0.45 |
| -6 | -1 | 0 | 2.14   | 0.36 |
| 6  | -1 | 0 | 2.66   | 0.30 |
| -6 | -1 | 0 | 2.59   | 0.30 |
| 6  | -1 | 0 | 2.67   | 0.20 |
| 6  | -1 | 0 | 1.87   | 0.34 |
| 6  | -1 | 0 | 3.09   | 0.42 |
| 6  | 1  | 0 | 1.96   | 0.35 |
| -6 | 1  | 0 | 2.53   | 0.39 |
| -6 | 1  | 0 | 2.31   | 0.30 |
| -6 | 1  | 0 | 2.83   | 0.28 |
| 6  | 1  | 0 | 2.43   | 0.34 |
| 6  | 1  | 0 | 2.45   | 0.22 |
| -7 | -1 | 0 | 11.25  | 0.52 |
| 7  | -1 | 0 | 10.88  | 0.55 |
| 7  | -1 | 0 | 10.94  | 0.65 |
| -7 | -1 | 0 | 11.80  | 0.59 |
| 7  | -1 | 0 | 11.30  | 0.39 |
| -7 | -1 | 0 | 12.62  | 0.78 |
| -7 | 1  | 0 | 10.23  | 0.49 |
| 7  | 1  | 0 | 12.64  | 0.76 |
| -7 | 1  | 0 | 10.21  | 0.55 |
| 7  | 1  | 0 | 12.20  | 0.45 |
| 7  | 1  | 0 | 11.29  | 0.65 |
| -7 | 1  | 0 | 11.41  | 0.78 |
| 8  | -1 | 0 | 3.06   | 0.49 |
| -8 | -1 | 0 | 2.29   | 0.37 |
| -8 | -1 | 0 | 3.22   | 0.38 |
| 8  | 1  | 0 | 3.12   | 0.29 |
| -8 | 1  | 0 | 3.11   | 0.34 |
| -8 | 1  | 0 | 2.44   | 0.37 |
| 8  | 1  | 0 | 2.86   | 0.43 |
| -9 | -1 | 0 | 0.87   | 0.31 |
| 9  | -1 | 0 | 0.81   | 0.40 |

-9 -1 0 0.63 0.31  
9 1 0 0.59 0.34  
-9 1 0 0.89 0.31  
-9 1 0 1.27 0.38  
-10 -1 0 2.51 0.41  
10 -1 0 2.89 0.49  
10 1 0 2.38 0.49  
-10 1 0 3.68 0.49  
-11 -1 0 -0.43 0.34  
11 -1 0 0.86 0.39  
11 1 0 -0.17 0.39  
-11 1 0 -0.20 0.31  
12 -1 0 0.07 0.47  
-12 -1 0 -0.13 0.35  
12 1 0 0.06 0.45  
-12 1 0 -0.58 0.40  
-13 -1 0 -0.04 0.43  
13 -1 0 0.06 0.51  
-13 1 0 -0.05 0.40  
13 1 0 0.19 0.50  
0 -2 0 1000.00 18.87  
0 -2 0 946.93 20.33  
0 -2 0 926.22 19.13  
0 -2 0 949.32 19.22  
0 2 0 979.68 20.42  
0 2 0 933.65 17.88  
-1 -2 0 198.39 4.06  
1 -2 0 201.56 4.04  
-1 -2 0 199.88 4.29  
-1 -2 0 204.26 3.96  
1 2 0 198.99 3.78  
-1 2 0 201.96 3.75  
-1 2 0 201.95 4.33  
1 2 0 196.42 4.28  
1 2 0 197.77 4.03  
2 -2 0 589.70 12.42  
-2 -2 0 596.33 12.76  
-2 -2 0 578.55 11.62  
-2 -2 0 587.17 11.48  
2 -2 0 576.41 11.68  
2 -2 0 588.31 11.59  
2 2 0 584.13 12.39  
2 2 0 581.23 10.93  
-2 2 0 583.88 11.45  
-2 2 0 577.07 12.43  
2 2 0 577.43 11.73

-2 2 0 587.71 10.85  
-3 -2 0 43.60 1.13  
3 -2 0 41.82 1.15  
3 -2 0 43.44 1.04  
-3 -2 0 42.65 0.98  
-3 -2 0 42.43 1.01  
3 -2 0 42.77 0.98  
-3 2 0 42.52 1.02  
3 2 0 43.16 0.93  
3 2 0 42.76 1.12  
3 2 0 42.28 1.01  
-3 2 0 41.84 1.15  
-3 2 0 40.96 0.86  
-4 -2 0 0.81 0.19  
4 -2 0 1.14 0.25  
-4 -2 0 0.68 0.18  
4 -2 0 0.51 0.24  
-4 -2 0 0.74 0.22  
4 -2 0 0.76 0.18  
4 2 0 0.89 0.23  
4 2 0 0.46 0.20  
-4 2 0 1.22 0.26  
-4 2 0 0.80 0.10  
-4 2 0 0.65 0.19  
5 -2 0 4.61 0.39  
-5 -2 0 4.46 0.41  
-5 -2 0 5.75 0.56  
5 -2 0 4.24 0.31  
-5 -2 0 4.54 0.33  
5 -2 0 3.68 0.39  
-5 2 0 4.32 0.20  
5 2 0 4.67 0.36  
-5 2 0 4.85 0.37  
5 2 0 3.40 0.37  
5 2 0 4.44 0.28  
-5 2 0 5.26 0.45  
6 -2 0 5.94 0.48  
6 -2 0 5.84 0.26  
6 -2 0 5.80 0.52  
-6 -2 0 6.34 0.44  
-6 -2 0 5.68 0.51  
6 -2 0 5.46 0.36  
6 2 0 4.91 0.48  
6 2 0 5.82 0.36  
-6 2 0 5.78 0.43  
6 2 0 5.68 0.44

-6 2 0 4.25 0.46  
-7 -2 0 8.03 0.67  
-7 -2 0 7.88 0.52  
7 -2 0 8.15 0.60  
7 -2 0 6.94 0.46  
7 -2 0 7.68 0.34  
7 2 0 8.17 0.41  
7 2 0 8.60 0.66  
7 2 0 7.88 0.57  
-7 2 0 7.65 0.51  
-7 2 0 8.29 0.69  
8 -2 0 7.42 0.62  
8 -2 0 6.69 0.49  
-8 -2 0 6.53 0.52  
8 2 0 5.26 0.53  
8 2 0 6.64 0.41  
-8 2 0 7.17 0.52  
-8 2 0 6.30 0.46  
-9 -2 0 7.65 0.54  
-9 -2 0 6.97 0.53  
9 -2 0 7.52 0.65  
9 -2 0 6.97 0.53  
9 2 0 7.14 0.59  
-9 2 0 6.51 0.58  
-9 2 0 7.29 0.48  
-10 -2 0 1.59 0.39  
10 -2 0 0.54 0.41  
-10 -2 0 0.65 0.51  
-10 2 0 1.64 0.43  
10 2 0 1.02 0.42  
-11 -2 0 -0.27 0.33  
11 -2 0 0.13 0.41  
-11 2 0 -0.37 0.36  
11 2 0 -0.31 0.39  
12 -2 0 0.49 0.49  
-12 -2 0 0.20 0.41  
12 2 0 0.24 0.47  
-12 2 0 0.27 0.44  
-13 -2 0 0.21 0.42  
13 -2 0 0.46 0.52  
-13 2 0 -0.50 0.46  
13 2 0 0.26 0.50  
0 -3 0 0.04 0.11  
0 -3 0 0.09 0.18  
0 -3 0 0.09 0.13  
0 3 0 -0.28 0.12

|    |    |   |        |      |
|----|----|---|--------|------|
| 0  | 3  | 0 | 0.01   | 0.12 |
| -1 | -3 | 0 | 106.15 | 2.14 |
| -1 | -3 | 0 | 107.04 | 2.32 |
| 1  | -3 | 0 | 103.64 | 2.35 |
| -1 | -3 | 0 | 105.11 | 2.25 |
| 1  | -3 | 0 | 101.78 | 2.21 |
| 1  | -3 | 0 | 105.97 | 2.41 |
| -1 | 3  | 0 | 106.10 | 2.05 |
| -1 | 3  | 0 | 104.64 | 2.37 |
| 1  | 3  | 0 | 103.33 | 2.07 |
| 1  | 3  | 0 | 106.02 | 2.16 |
| -1 | 3  | 0 | 105.41 | 2.18 |
| 2  | -3 | 0 | 29.62  | 0.75 |
| -2 | -3 | 0 | 28.86  | 0.71 |
| 2  | -3 | 0 | 29.26  | 0.83 |
| -2 | -3 | 0 | 28.53  | 0.79 |
| 2  | -3 | 0 | 29.33  | 0.75 |
| -2 | -3 | 0 | 27.99  | 0.78 |
| -2 | 3  | 0 | 29.94  | 0.76 |
| 2  | 3  | 0 | 29.14  | 0.71 |
| 2  | 3  | 0 | 29.03  | 0.71 |
| -2 | 3  | 0 | 29.61  | 0.86 |
| 2  | 3  | 0 | 29.99  | 0.79 |
| -2 | 3  | 0 | 29.55  | 0.66 |
| 3  | -3 | 0 | 191.59 | 4.27 |
| -3 | -3 | 0 | 194.57 | 4.23 |
| -3 | -3 | 0 | 187.14 | 3.96 |
| 3  | -3 | 0 | 196.27 | 3.93 |
| 3  | -3 | 0 | 190.59 | 3.98 |
| -3 | -3 | 0 | 187.77 | 3.86 |
| -3 | 3  | 0 | 191.62 | 4.29 |
| 3  | 3  | 0 | 186.29 | 3.93 |
| 3  | 3  | 0 | 191.90 | 4.22 |
| -3 | 3  | 0 | 186.38 | 3.60 |
| -3 | 3  | 0 | 192.87 | 3.92 |
| 3  | 3  | 0 | 192.70 | 3.69 |
| 4  | -3 | 0 | 14.35  | 0.49 |
| -4 | -3 | 0 | 14.13  | 0.49 |
| 4  | -3 | 0 | 13.26  | 0.55 |
| -4 | -3 | 0 | 14.91  | 0.60 |
| 4  | -3 | 0 | 14.46  | 0.63 |
| -4 | -3 | 0 | 13.40  | 0.51 |
| -4 | 3  | 0 | 14.08  | 0.38 |
| 4  | 3  | 0 | 14.80  | 0.48 |
| -4 | 3  | 0 | 14.63  | 0.64 |
| 4  | 3  | 0 | 13.97  | 0.59 |

|    |    |   |       |      |
|----|----|---|-------|------|
| -4 | 3  | 0 | 14.37 | 0.54 |
| 4  | 3  | 0 | 13.91 | 0.52 |
| -5 | -3 | 0 | 19.61 | 0.67 |
| 5  | -3 | 0 | 19.45 | 0.63 |
| 5  | -3 | 0 | 20.55 | 0.82 |
| -5 | -3 | 0 | 18.98 | 0.63 |
| 5  | -3 | 0 | 19.55 | 0.72 |
| -5 | -3 | 0 | 20.78 | 0.80 |
| -5 | 3  | 0 | 20.45 | 0.84 |
| 5  | 3  | 0 | 21.80 | 0.78 |
| -5 | 3  | 0 | 18.90 | 0.68 |
| 5  | 3  | 0 | 19.97 | 0.72 |
| -5 | 3  | 0 | 19.61 | 0.48 |
| 5  | 3  | 0 | 19.25 | 0.67 |
| 6  | -3 | 0 | 3.91  | 0.44 |
| -6 | -3 | 0 | 4.17  | 0.38 |
| -6 | -3 | 0 | 4.31  | 0.38 |
| 6  | -3 | 0 | 4.08  | 0.44 |
| 6  | -3 | 0 | 4.44  | 0.36 |
| -6 | -3 | 0 | 4.67  | 0.48 |
| -6 | 3  | 0 | 4.14  | 0.23 |
| 6  | 3  | 0 | 3.45  | 0.42 |
| 6  | 3  | 0 | 4.71  | 0.43 |
| -6 | 3  | 0 | 3.60  | 0.48 |
| -6 | 3  | 0 | 4.71  | 0.44 |
| 7  | -3 | 0 | 8.34  | 0.47 |
| -7 | -3 | 0 | 9.29  | 0.70 |
| -7 | -3 | 0 | 8.89  | 0.53 |
| 7  | -3 | 0 | 6.12  | 0.52 |
| -7 | -3 | 0 | 9.27  | 0.80 |
| 7  | 3  | 0 | 8.17  | 0.65 |
| 7  | 3  | 0 | 8.27  | 0.58 |
| -7 | 3  | 0 | 8.27  | 0.58 |
| 7  | 3  | 0 | 9.57  | 0.46 |
| 8  | -3 | 0 | 0.07  | 0.34 |
| 8  | -3 | 0 | 0.14  | 0.24 |
| -8 | -3 | 0 | -0.22 | 0.29 |
| 8  | 3  | 0 | 0.18  | 0.23 |
| 8  | 3  | 0 | 0.25  | 0.33 |
| -8 | 3  | 0 | -0.21 | 0.26 |
| 9  | -3 | 0 | 0.70  | 0.32 |
| 9  | -3 | 0 | 1.36  | 0.43 |
| -9 | -3 | 0 | 0.43  | 0.32 |
| 9  | 3  | 0 | 0.84  | 0.39 |
| -9 | 3  | 0 | 0.59  | 0.31 |
| -9 | 3  | 0 | 0.77  | 0.29 |

-10 -3 0 -0.56 0.31  
-10 -3 0 -0.05 0.32  
10 -3 0 0.34 0.41  
-10 3 0 -0.48 0.32  
10 3 0 0.62 0.40  
-11 -3 0 0.04 0.35  
11 -3 0 0.39 0.41  
11 3 0 0.58 0.44  
-11 3 0 0.13 0.34  
12 -3 0 0.05 0.47  
-12 -3 0 0.43 0.41  
12 3 0 0.65 0.47  
-12 3 0 0.38 0.46  
13 -3 0 0.64 0.54  
-13 -3 0 -0.06 0.43  
13 3 0 0.27 0.51  
-13 3 0 0.30 0.51  
0 -4 0 48.14 1.17  
0 -4 0 48.79 1.19  
0 -4 0 47.83 1.08  
0 4 0 47.86 1.07  
0 4 0 48.89 1.17  
-1 -4 0 16.27 0.46  
-1 -4 0 15.73 0.48  
1 -4 0 16.15 0.48  
1 -4 0 15.72 0.56  
1 -4 0 15.87 0.53  
-1 -4 0 15.24 0.57  
-1 -4 0 16.12 0.49  
1 4 0 15.05 0.49  
-1 4 0 15.35 0.47  
-1 4 0 15.54 0.49  
-1 4 0 16.03 0.55  
1 4 0 14.80 0.42  
-2 -4 0 192.33 3.81  
-2 -4 0 187.43 3.96  
2 -4 0 192.58 3.91  
-2 -4 0 186.99 4.12  
2 4 0 188.91 4.13  
2 4 0 186.42 3.67  
-2 4 0 189.01 3.62  
-2 4 0 185.69 4.22  
-2 4 0 188.66 3.86  
2 4 0 188.53 3.86  
-3 -4 0 9.36 0.46  
-3 -4 0 9.48 0.38



-3 -4 0 10.63 0.46  
3 -4 0 9.82 0.50  
3 -4 0 10.12 0.43  
3 -4 0 10.22 0.44  
-3 4 0 9.56 0.51  
3 4 0 10.22 0.39  
3 4 0 10.49 0.41  
-3 4 0 10.16 0.34  
-3 4 0 10.16 0.43  
3 4 0 10.80 0.46  
-4 -4 0 7.06 0.45  
-4 -4 0 7.44 0.38  
-4 -4 0 7.30 0.45  
4 -4 0 7.34 0.39  
4 -4 0 6.75 0.43  
4 -4 0 6.69 0.49  
4 4 0 7.06 0.39  
-4 4 0 7.28 0.43  
4 4 0 6.64 0.38  
-4 4 0 6.81 0.50  
4 4 0 7.50 0.44  
-4 4 0 6.95 0.27  
5 -4 0 46.32 1.17  
5 -4 0 45.75 1.24  
5 -4 0 45.57 1.40  
-5 -4 0 45.04 1.16  
-5 -4 0 47.96 1.26  
-5 -4 0 45.89 1.34  
-5 4 0 48.00 1.44  
5 4 0 47.65 1.35  
5 4 0 46.75 1.12  
-5 4 0 45.09 1.24  
-5 4 0 46.10 1.00  
5 4 0 48.92 1.21  
-6 -4 0 3.39 0.45  
6 -4 0 3.89 0.36  
-6 -4 0 3.86 0.37  
6 -4 0 3.58 0.45  
-6 -4 0 3.52 0.40  
6 -4 0 3.89 0.44  
-6 4 0 3.31 0.46  
-6 4 0 3.54 0.23  
6 4 0 3.72 0.39  
6 4 0 3.54 0.44  
-6 4 0 4.85 0.47  
6 4 0 3.76 0.35

-7 -4 0 3.26 0.40  
-7 -4 0 3.64 0.50  
-7 -4 0 3.02 0.42  
7 -4 0 3.26 0.37  
7 -4 0 3.05 0.47  
7 4 0 3.73 0.45  
7 4 0 3.51 0.46  
-7 4 0 2.58 0.41  
-8 -4 0 8.04 0.58  
8 -4 0 6.88 0.57  
8 -4 0 8.21 0.52  
-8 -4 0 7.66 0.55  
8 4 0 8.38 0.49  
8 4 0 6.50 0.55  
-8 4 0 7.40 0.58  
-9 -4 0 1.65 0.38  
9 -4 0 1.32 0.34  
9 -4 0 1.52 0.45  
9 4 0 1.49 0.41  
-9 4 0 1.16 0.39  
9 4 0 1.41 0.32  
10 -4 0 -0.42 0.39  
-10 -4 0 0.05 0.34  
-10 4 0 -0.47 0.33  
10 4 0 0.77 0.39  
-11 -4 0 0.23 0.38  
11 -4 0 -0.14 0.45  
11 4 0 0.31 0.41  
-11 4 0 -0.11 0.40  
-12 -4 0 0.70 0.44  
12 -4 0 0.63 0.53  
12 4 0 -0.08 0.47  
-12 4 0 0.20 0.41  
-13 -4 0 0.57 0.74  
-13 4 0 0.44 0.76  
13 4 0 0.42 0.51  
0 -5 0 0.33 0.14  
0 -5 0 -0.03 0.15  
0 -5 0 -0.08 0.21  
0 5 0 -0.07 0.14  
0 5 0 0.43 0.19  
-1 -5 0 57.69 1.39  
-1 -5 0 58.46 1.30  
-1 -5 0 57.83 1.44  
-1 -5 0 58.75 1.41  
1 -5 0 57.43 1.41

|    |    |   |       |      |
|----|----|---|-------|------|
| 1  | -5 | 0 | 58.61 | 1.33 |
| 1  | -5 | 0 | 57.85 | 1.46 |
| 1  | 5  | 0 | 55.80 | 1.27 |
| 1  | 5  | 0 | 59.14 | 1.31 |
| -1 | 5  | 0 | 60.08 | 1.35 |
| -1 | 5  | 0 | 59.54 | 1.46 |
| -1 | 5  | 0 | 60.37 | 1.29 |
| -2 | -5 | 0 | 25.73 | 0.73 |
| 2  | -5 | 0 | 24.65 | 0.73 |
| 2  | -5 | 0 | 25.11 | 0.75 |
| -2 | -5 | 0 | 25.75 | 0.83 |
| -2 | -5 | 0 | 26.07 | 0.68 |
| 2  | -5 | 0 | 26.56 | 0.84 |
| 2  | 5  | 0 | 25.80 | 0.66 |
| -2 | 5  | 0 | 24.98 | 0.72 |
| 2  | 5  | 0 | 24.87 | 0.71 |
| -2 | 5  | 0 | 25.14 | 0.66 |
| -2 | 5  | 0 | 26.41 | 0.84 |
| 3  | -5 | 0 | 41.36 | 1.19 |
| 3  | -5 | 0 | 40.74 | 1.08 |
| 3  | -5 | 0 | 42.98 | 1.07 |
| -3 | -5 | 0 | 40.41 | 1.15 |
| -3 | -5 | 0 | 41.10 | 1.12 |
| -3 | -5 | 0 | 41.63 | 1.01 |
| -3 | 5  | 0 | 41.16 | 1.23 |
| -3 | 5  | 0 | 43.09 | 1.10 |
| 3  | 5  | 0 | 41.60 | 1.12 |
| 3  | 5  | 0 | 41.99 | 1.03 |
| 3  | 5  | 0 | 42.13 | 1.01 |
| -3 | 5  | 0 | 41.47 | 0.96 |
| -4 | -5 | 0 | 21.10 | 0.79 |
| 4  | -5 | 0 | 21.26 | 0.70 |
| -4 | -5 | 0 | 20.54 | 0.64 |
| 4  | -5 | 0 | 21.77 | 0.74 |
| -4 | -5 | 0 | 22.12 | 0.77 |
| 4  | -5 | 0 | 21.97 | 0.84 |
| 4  | 5  | 0 | 20.55 | 0.74 |
| -4 | 5  | 0 | 20.64 | 0.57 |
| 4  | 5  | 0 | 20.44 | 0.68 |
| 4  | 5  | 0 | 19.97 | 0.65 |
| -4 | 5  | 0 | 19.66 | 0.72 |
| -4 | 5  | 0 | 20.89 | 0.84 |
| -5 | -5 | 0 | 36.49 | 1.15 |
| 5  | -5 | 0 | 40.58 | 1.30 |
| 5  | -5 | 0 | 41.77 | 1.10 |
| 5  | -5 | 0 | 41.33 | 1.16 |

|     |    |   |       |      |
|-----|----|---|-------|------|
| -5  | -5 | 0 | 39.17 | 1.23 |
| -5  | -5 | 0 | 42.42 | 1.08 |
| 5   | 5  | 0 | 40.92 | 1.05 |
| 5   | 5  | 0 | 40.71 | 1.10 |
| -5  | 5  | 0 | 39.42 | 1.14 |
| -5  | 5  | 0 | 40.08 | 0.92 |
| 5   | 5  | 0 | 40.76 | 1.21 |
| -5  | 5  | 0 | 39.06 | 1.33 |
| -6  | -5 | 0 | 3.70  | 0.45 |
| 6   | -5 | 0 | 3.41  | 0.47 |
| 6   | -5 | 0 | 4.25  | 0.40 |
| 6   | -5 | 0 | 4.04  | 0.47 |
| -6  | -5 | 0 | 4.44  | 0.41 |
| -6  | -5 | 0 | 4.05  | 0.46 |
| -6  | 5  | 0 | 3.78  | 0.51 |
| 6   | 5  | 0 | 3.31  | 0.42 |
| -6  | 5  | 0 | 4.58  | 0.47 |
| -6  | 5  | 0 | 3.92  | 0.26 |
| 6   | 5  | 0 | 4.33  | 0.38 |
| 6   | 5  | 0 | 3.62  | 0.40 |
| -7  | -5 | 0 | 2.03  | 0.44 |
| -7  | -5 | 0 | 2.02  | 0.38 |
| 7   | -5 | 0 | 1.49  | 0.41 |
| 7   | -5 | 0 | 2.30  | 0.34 |
| -7  | -5 | 0 | 1.44  | 0.33 |
| 7   | 5  | 0 | 1.47  | 0.36 |
| 7   | 5  | 0 | 1.27  | 0.37 |
| 7   | 5  | 0 | 1.12  | 0.31 |
| -7  | 5  | 0 | 1.55  | 0.37 |
| -8  | -5 | 0 | 4.38  | 0.51 |
| -8  | -5 | 0 | 4.47  | 0.45 |
| 8   | -5 | 0 | 5.22  | 0.45 |
| 8   | -5 | 0 | 4.78  | 0.55 |
| -8  | 5  | 0 | 4.41  | 0.53 |
| 8   | 5  | 0 | 4.56  | 0.48 |
| -9  | -5 | 0 | 0.79  | 0.34 |
| 9   | -5 | 0 | 1.66  | 0.43 |
| 9   | -5 | 0 | 1.51  | 0.37 |
| -9  | -5 | 0 | 0.51  | 0.42 |
| -9  | 5  | 0 | 1.52  | 0.39 |
| 9   | 5  | 0 | 1.77  | 0.41 |
| 10  | -5 | 0 | -0.03 | 0.43 |
| -10 | -5 | 0 | 0.03  | 0.33 |
| -10 | 5  | 0 | 0.48  | 0.38 |
| 10  | 5  | 0 | 0.98  | 0.42 |
| -11 | -5 | 0 | 0.49  | 0.42 |

|     |    |   |       |      |
|-----|----|---|-------|------|
| 11  | -5 | 0 | 0.41  | 0.48 |
| -11 | 5  | 0 | 0.16  | 0.42 |
| 11  | 5  | 0 | 0.24  | 0.45 |
| 12  | -5 | 0 | 0.89  | 0.54 |
| 12  | 5  | 0 | 0.47  | 0.49 |
| -12 | 5  | 0 | -0.17 | 0.39 |
| 13  | 5  | 0 | -0.11 | 0.50 |
| 0   | -6 | 0 | 29.38 | 0.78 |
| 0   | -6 | 0 | 29.56 | 0.92 |
| 0   | -6 | 0 | 30.94 | 0.87 |
| 0   | 6  | 0 | 29.83 | 0.82 |
| 0   | 6  | 0 | 31.58 | 0.86 |
| -1  | -6 | 0 | 11.27 | 0.58 |
| -1  | -6 | 0 | 13.65 | 0.47 |
| 1   | -6 | 0 | 13.44 | 0.55 |
| -1  | -6 | 0 | 12.86 | 0.49 |
| 1   | -6 | 0 | 11.63 | 0.58 |
| -1  | -6 | 0 | 11.53 | 0.41 |
| -1  | -6 | 0 | 12.45 | 0.45 |
| 1   | -6 | 0 | 13.15 | 0.47 |
| -1  | 6  | 0 | 11.88 | 0.47 |
| 1   | 6  | 0 | 12.67 | 0.53 |
| -1  | 6  | 0 | 12.93 | 0.53 |
| -1  | 6  | 0 | 12.33 | 0.47 |
| -2  | -6 | 0 | 1.80  | 0.22 |
| 2   | -6 | 0 | 1.73  | 0.32 |
| 2   | -6 | 0 | 1.98  | 0.25 |
| -2  | -6 | 0 | 2.38  | 0.25 |
| -2  | -6 | 0 | 2.49  | 0.40 |
| 2   | -6 | 0 | 1.89  | 0.29 |
| -2  | -6 | 0 | 2.21  | 0.23 |
| -2  | 6  | 0 | 1.58  | 0.28 |
| 2   | 6  | 0 | 2.44  | 0.30 |
| -2  | 6  | 0 | 2.25  | 0.27 |
| 2   | 6  | 0 | 2.43  | 0.22 |
| -2  | 6  | 0 | 2.11  | 0.27 |
| -3  | -6 | 0 | 16.45 | 0.62 |
| -3  | -6 | 0 | 17.04 | 0.55 |
| 3   | -6 | 0 | 16.24 | 0.62 |
| -3  | -6 | 0 | 15.75 | 0.74 |
| 3   | 6  | 0 | 16.76 | 0.61 |
| -3  | 6  | 0 | 16.42 | 0.74 |
| -3  | 6  | 0 | 15.60 | 0.53 |
| 3   | 6  | 0 | 16.99 | 0.62 |
| -3  | 6  | 0 | 17.13 | 0.62 |
| 3   | 6  | 0 | 16.49 | 0.54 |

-4 -6 0 46.54 1.32  
4 -6 0 48.29 1.27  
4 -6 0 45.27 1.27  
-4 -6 0 47.33 1.19  
4 -6 0 46.81 1.41  
-4 -6 0 46.93 1.35  
4 6 0 48.27 1.23  
-4 6 0 48.72 1.30  
4 6 0 48.56 1.32  
4 6 0 47.72 1.19  
-4 6 0 47.90 1.46  
-4 6 0 48.52 1.11  
-5 -6 0 5.27 0.46  
5 -6 0 4.97 0.45  
-5 -6 0 5.26 0.40  
-5 -6 0 4.63 0.48  
5 -6 0 3.74 0.47  
5 -6 0 5.71 0.45  
-5 6 0 4.92 0.32  
5 6 0 5.30 0.43  
5 6 0 5.45 0.42  
-5 6 0 4.39 0.51  
5 6 0 4.46 0.42  
-5 6 0 4.81 0.44  
-6 -6 0 22.89 0.94  
6 -6 0 22.73 0.80  
-6 -6 0 21.40 0.76  
6 -6 0 23.55 0.90  
-6 -6 0 20.28 0.91  
-6 6 0 20.87 1.03  
-6 6 0 21.63 0.86  
6 6 0 23.58 0.92  
6 6 0 21.71 0.80  
-6 6 0 21.12 0.62  
6 6 0 24.18 0.83  
7 -6 0 7.39 0.53  
-7 -6 0 6.26 0.60  
-7 -6 0 8.47 0.65  
7 -6 0 6.74 0.58  
-7 -6 0 6.92 0.49  
7 6 0 6.88 0.57  
7 6 0 7.50 0.53  
-7 6 0 6.57 0.57  
7 6 0 7.32 0.54  
-8 -6 0 0.36 0.30  
8 -6 0 0.70 0.33

8 -6 0 0.73 0.40  
-8 -6 0 0.61 0.40  
8 6 0 0.51 0.31  
-8 6 0 0.65 0.37  
8 6 0 0.48 0.34  
-9 -6 0 1.28 0.46  
9 -6 0 1.10 0.44  
-9 -6 0 1.49 0.38  
-9 6 0 1.28 0.42  
9 6 0 0.57 0.35  
9 6 0 1.32 0.41  
-10 -6 0 1.01 0.39  
-10 -6 0 0.16 0.44  
10 -6 0 1.48 0.49  
-10 6 0 0.33 0.42  
10 6 0 0.49 0.40  
11 -6 0 0.05 0.46  
-11 6 0 -0.07 0.36  
11 6 0 0.56 0.46  
12 -6 0 0.08 0.48  
12 6 0 0.29 0.51  
-12 6 0 -0.21 0.45  
0 -7 0 -0.26 0.18  
0 -7 0 0.57 0.35  
0 -7 0 -0.17 0.19  
0 7 0 -0.10 0.16  
0 7 0 -0.17 0.21  
0 7 0 -0.50 0.18  
-1 -7 0 13.42 0.48  
1 -7 0 14.32 0.53  
-1 -7 0 14.63 0.53  
-1 -7 0 14.67 0.74  
1 -7 0 14.07 0.67  
-1 -7 0 14.02 0.52  
-1 -7 0 13.95 0.56  
1 -7 0 13.28 0.61  
-1 7 0 13.97 0.63  
-1 7 0 14.57 0.56  
1 7 0 15.00 0.60  
-1 7 0 13.65 0.60  
2 -7 0 7.42 0.53  
-2 -7 0 6.59 0.39  
-2 -7 0 7.37 0.38  
2 -7 0 7.17 0.51  
2 -7 0 7.22 0.43  
-2 -7 0 7.57 0.58

-2 -7 0 7.75 0.43  
2 7 0 6.80 0.36  
2 7 0 6.55 0.45  
-2 7 0 7.08 0.41  
-2 7 0 7.58 0.51  
-2 7 0 7.86 0.45  
-3 -7 0 22.07 0.76  
-3 -7 0 22.34 0.71  
3 -7 0 23.84 0.77  
3 -7 0 22.47 0.86  
-3 -7 0 22.74 0.76  
-3 -7 0 23.15 0.92  
3 -7 0 22.89 0.83  
3 7 0 22.92 0.77  
-3 7 0 23.07 0.71  
-3 7 0 22.67 0.90  
3 7 0 23.91 0.69  
-3 7 0 21.95 0.76  
-4 -7 0 0.72 0.25  
-4 -7 0 0.20 0.40  
-4 -7 0 1.10 0.26  
4 -7 0 1.48 0.35  
4 -7 0 0.94 0.51  
-4 7 0 0.86 0.28  
4 7 0 0.40 0.28  
4 7 0 0.99 0.27  
-4 7 0 1.21 0.26  
4 7 0 0.82 0.25  
-4 7 0 1.13 0.35  
5 -7 0 7.64 0.55  
5 -7 0 8.94 0.63  
-5 -7 0 7.41 0.57  
5 -7 0 6.30 0.57  
-5 -7 0 7.71 0.67  
-5 -7 0 7.52 0.46  
-5 7 0 6.91 0.40  
5 7 0 7.43 0.56  
-5 7 0 6.77 0.53  
5 7 0 6.57 0.49  
-5 7 0 7.98 0.67  
5 7 0 7.58 0.50  
-6 -7 0 5.39 0.43  
-6 -7 0 5.46 0.58  
-6 -7 0 5.72 0.52  
6 -7 0 4.58 0.45  
6 -7 0 5.80 0.53



6 7 0 5.29 0.45  
6 7 0 4.29 0.45  
-6 7 0 4.36 0.47  
6 7 0 6.20 0.51  
-7 -7 0 0.24 0.28  
7 -7 0 0.10 0.29  
7 -7 0 0.18 0.35  
-7 -7 0 0.51 0.42  
7 7 0 -0.47 0.25  
-7 7 0 0.65 0.33  
7 7 0 0.72 0.41  
7 7 0 0.17 0.31  
-8 -7 0 -0.47 0.37  
8 -7 0 -0.13 0.36  
-8 -7 0 0.29 0.29  
8 -7 0 0.37 0.31  
8 7 0 -0.02 0.28  
8 7 0 -0.19 0.33  
-8 7 0 0.47 0.39  
-9 -7 0 1.57 0.51  
9 -7 0 1.92 0.50  
-9 -7 0 2.56 0.44  
-9 7 0 1.63 0.45  
9 7 0 1.86 0.44  
9 7 0 1.75 0.40  
10 -7 0 -0.26 0.41  
-10 -7 0 -0.43 0.47  
-10 7 0 -0.18 0.36  
10 7 0 0.27 0.41  
11 -7 0 0.86 0.53  
-11 7 0 0.26 0.42  
12 -7 0 -0.17 0.52  
-12 7 0 0.18 0.46  
0 -8 0 4.63 0.49  
0 -8 0 5.61 0.41  
0 -8 0 6.22 0.40  
0 8 0 5.23 0.43  
0 8 0 5.85 0.41  
0 8 0 5.71 0.40  
-1 -8 0 9.95 0.52  
1 -8 0 11.57 0.69  
-1 -8 0 9.99 0.44  
-1 -8 0 10.46 0.68  
1 -8 0 9.98 0.56  
1 -8 0 9.85 0.49  
-1 -8 0 10.09 0.47

1 8 0 10.19 0.49  
-1 8 0 10.41 0.55  
1 8 0 9.13 0.58  
-1 8 0 9.51 0.56  
-2 -8 0 11.17 0.51  
2 -8 0 10.88 0.63  
2 -8 0 11.00 0.62  
2 -8 0 11.69 0.53  
-2 -8 0 10.99 0.77  
-2 -8 0 10.83 0.53  
-2 -8 0 11.48 0.50  
2 8 0 10.74 0.58  
-2 8 0 10.64 0.62  
-2 8 0 11.42 0.56  
-2 8 0 11.15 0.57  
-3 -8 0 2.31 0.53  
-3 -8 0 2.02 0.29  
-3 -8 0 2.25 0.30  
3 -8 0 2.14 0.37  
3 -8 0 2.34 0.34  
-3 -8 0 2.26 0.31  
3 -8 0 1.87 0.41  
-3 8 0 1.91 0.35  
-3 8 0 2.05 0.31  
3 8 0 2.47 0.37  
3 8 0 2.76 0.29  
-3 8 0 1.68 0.36  
4 -8 0 2.45 0.39  
-4 -8 0 3.38 0.36  
-4 -8 0 4.09 0.37  
-4 -8 0 3.02 0.34  
-4 -8 0 2.98 0.56  
4 8 0 4.02 0.35  
-4 8 0 3.85 0.44  
-4 8 0 3.94 0.37  
-4 8 0 3.34 0.47  
4 8 0 3.30 0.41  
-5 -8 0 3.65 0.53  
-5 -8 0 4.67 0.41  
5 -8 0 3.34 0.45  
5 -8 0 4.03 0.46  
5 -8 0 3.91 0.49  
5 8 0 4.35 0.39  
5 8 0 4.51 0.45  
-5 8 0 4.19 0.47  
-5 8 0 3.48 0.52

-5 8 0 4.12 0.36  
-6 -8 0 1.04 0.30  
6 -8 0 0.92 0.32  
-6 -8 0 0.44 0.45  
6 -8 0 0.38 0.33  
6 8 0 0.80 0.31  
-6 8 0 0.59 0.30  
6 8 0 0.54 0.29  
-7 -8 0 1.28 0.33  
7 -8 0 1.58 0.38  
-7 -8 0 0.82 0.43  
7 -8 0 1.56 0.43  
-7 8 0 1.30 0.37  
7 8 0 0.57 0.50  
7 8 0 1.39 0.39  
8 -8 0 0.55 0.34  
8 -8 0 0.34 0.41  
-8 -8 0 0.45 0.49  
-8 8 0 -0.20 0.38  
8 8 0 0.40 0.33  
9 -8 0 0.39 0.43  
-9 -8 0 0.44 0.50  
9 8 0 0.85 0.40  
-9 8 0 0.76 0.39  
-10 -8 0 0.03 0.54  
10 -8 0 2.10 0.55  
-10 8 0 1.24 0.52  
10 8 0 1.10 0.44  
11 -8 0 0.43 0.53  
-11 8 0 0.39 0.44  
0 -9 0 -0.25 0.24  
0 -9 0 -0.20 0.36  
0 -9 0 0.25 0.24  
0 9 0 -0.04 0.28  
0 9 0 -0.50 0.21  
1 -9 0 0.38 0.26  
-1 -9 0 0.46 0.40  
-1 -9 0 0.30 0.26  
1 -9 0 0.53 0.37  
1 -9 0 0.89 0.29  
1 9 0 0.42 0.24  
-1 9 0 0.58 0.33  
-1 9 0 0.55 0.26  
1 9 0 0.15 0.30  
2 -9 0 6.44 0.47  
-2 -9 0 7.88 0.71

|    |    |   |       |      |
|----|----|---|-------|------|
| 2  | -9 | 0 | 6.59  | 0.50 |
| -2 | -9 | 0 | 6.36  | 0.44 |
| 2  | -9 | 0 | 4.98  | 0.53 |
| 2  | 9  | 0 | 6.03  | 0.50 |
| -2 | 9  | 0 | 7.19  | 0.54 |
| -2 | 9  | 0 | 7.28  | 0.50 |
| -2 | 9  | 0 | 6.62  | 0.49 |
| 3  | -9 | 0 | 10.23 | 0.56 |
| 3  | -9 | 0 | 10.18 | 0.69 |
| 3  | -9 | 0 | 10.22 | 0.65 |
| -3 | -9 | 0 | 10.81 | 0.81 |
| -3 | -9 | 0 | 10.70 | 0.50 |
| 3  | 9  | 0 | 10.08 | 0.65 |
| -3 | 9  | 0 | 9.95  | 0.59 |
| -3 | 9  | 0 | 9.23  | 0.68 |
| -3 | 9  | 0 | 10.30 | 0.58 |
| 4  | -9 | 0 | 1.73  | 0.39 |
| -4 | -9 | 0 | 3.23  | 0.35 |
| 4  | -9 | 0 | 3.14  | 0.41 |
| -4 | -9 | 0 | 2.73  | 0.51 |
| 4  | -9 | 0 | 2.50  | 0.43 |
| -4 | 9  | 0 | 2.27  | 0.44 |
| -4 | 9  | 0 | 2.95  | 0.41 |
| 4  | 9  | 0 | 2.23  | 0.39 |
| -4 | 9  | 0 | 2.39  | 0.34 |
| -5 | -9 | 0 | 3.03  | 0.35 |
| -5 | -9 | 0 | 2.36  | 0.58 |
| 5  | -9 | 0 | 2.66  | 0.43 |
| -5 | 9  | 0 | 2.71  | 0.35 |
| 5  | 9  | 0 | 2.38  | 0.38 |
| -5 | 9  | 0 | 2.64  | 0.43 |
| -5 | 9  | 0 | 1.95  | 0.46 |
| 6  | -9 | 0 | 1.91  | 0.42 |
| -6 | -9 | 0 | 2.47  | 0.58 |
| 6  | -9 | 0 | 1.75  | 0.39 |
| 6  | 9  | 0 | 1.41  | 0.39 |
| -6 | 9  | 0 | 1.40  | 0.37 |
| 7  | -9 | 0 | 0.66  | 0.39 |
| -7 | -9 | 0 | 0.45  | 0.50 |
| 7  | -9 | 0 | 0.53  | 0.34 |
| 7  | 9  | 0 | 0.60  | 0.33 |
| -7 | 9  | 0 | 0.90  | 0.40 |
| 8  | -9 | 0 | 0.41  | 0.41 |
| -8 | -9 | 0 | -0.43 | 0.41 |
| 8  | -9 | 0 | 0.05  | 0.34 |
| 8  | 9  | 0 | 0.07  | 0.32 |

-8 9 0 0.15 0.36  
-9 -9 0 0.08 0.55  
9 -9 0 -0.10 0.43  
-9 9 0 0.39 0.45  
9 9 0 -0.46 0.31  
-10 -9 0 -0.64 0.55  
10 -9 0 -0.44 0.45  
-10 9 0 -0.09 0.41  
10 9 0 -0.39 0.34  
11 -9 0 1.09 0.58  
-11 9 0 -0.24 0.49  
0 -10 0 0.31 0.42  
0 10 0 0.01 0.29  
0 10 0 0.00 0.26  
1 -10 0 1.44 0.46  
-1 -10 0 1.64 0.45  
1 10 0 1.79 0.37  
1 10 0 1.40 0.29  
-1 10 0 2.12 0.41  
2 -10 0 0.01 0.39  
-2 -10 0 0.68 0.42  
2 10 0 0.18 0.25  
-2 10 0 0.46 0.32  
-2 10 0 0.56 0.28  
2 10 0 -0.01 0.30  
-3 -10 0 0.72 0.26  
3 -10 0 0.66 0.39  
-3 -10 0 0.57 0.49  
3 -10 0 0.19 0.29  
3 10 0 0.75 0.34  
-3 10 0 1.13 0.32  
-3 10 0 0.05 0.30  
-4 -10 0 1.09 0.53  
4 -10 0 0.58 0.34  
4 -10 0 0.34 0.36  
-4 -10 0 0.55 0.39  
4 10 0 0.81 0.38  
-4 10 0 0.99 0.32  
-4 10 0 0.67 0.34  
5 -10 0 1.78 0.40  
5 -10 0 1.39 0.40  
-5 -10 0 1.81 0.56  
-5 10 0 1.43 0.40  
5 10 0 0.97 0.35  
-5 10 0 1.85 0.33  
-6 -10 0 0.71 0.54

|     |     |   |       |      |
|-----|-----|---|-------|------|
| 6   | -10 | 0 | 1.05  | 0.37 |
| 6   | 10  | 0 | 0.57  | 0.34 |
| -6  | 10  | 0 | 0.82  | 0.37 |
| -7  | -10 | 0 | 0.44  | 0.48 |
| 7   | -10 | 0 | -0.19 | 0.37 |
| 7   | -10 | 0 | 0.10  | 0.35 |
| 7   | 10  | 0 | -0.40 | 0.30 |
| -7  | 10  | 0 | 0.13  | 0.32 |
| 8   | -10 | 0 | 0.54  | 0.42 |
| -8  | -10 | 0 | -0.15 | 0.57 |
| 8   | -10 | 0 | -0.09 | 0.42 |
| -8  | 10  | 0 | -0.19 | 0.36 |
| 8   | 10  | 0 | 0.35  | 0.36 |
| -9  | -10 | 0 | -1.28 | 0.57 |
| 9   | -10 | 0 | -0.56 | 0.44 |
| -9  | 10  | 0 | 0.18  | 0.46 |
| 9   | 10  | 0 | -0.01 | 0.40 |
| 10  | -10 | 0 | -0.07 | 0.49 |
| -10 | -10 | 0 | -0.02 | 0.64 |
| -10 | 10  | 0 | -0.44 | 0.40 |
| 10  | 10  | 0 | -0.30 | 0.42 |
| 11  | -10 | 0 | 1.14  | 0.61 |
| 0   | -11 | 0 | -0.24 | 0.39 |
| 0   | 11  | 0 | 0.26  | 0.26 |
| 0   | 11  | 0 | 0.25  | 0.32 |
| 1   | -11 | 0 | 1.18  | 0.47 |
| -1  | -11 | 0 | 1.74  | 0.51 |
| -1  | 11  | 0 | 2.00  | 0.39 |
| 1   | 11  | 0 | 1.54  | 0.38 |
| 1   | 11  | 0 | 2.53  | 0.36 |
| 2   | -11 | 0 | 4.45  | 0.54 |
| -2  | -11 | 0 | 4.74  | 0.65 |
| 2   | 11  | 0 | 3.45  | 0.45 |
| -2  | 11  | 0 | 4.99  | 0.52 |
| -2  | 11  | 0 | 4.89  | 0.53 |
| 3   | -11 | 0 | 3.99  | 0.55 |
| -3  | -11 | 0 | 4.48  | 0.66 |
| -3  | 11  | 0 | 4.45  | 0.48 |
| -3  | 11  | 0 | 4.11  | 0.46 |
| 3   | 11  | 0 | 4.75  | 0.51 |
| -4  | -11 | 0 | 1.18  | 0.49 |
| 4   | -11 | 0 | 0.90  | 0.41 |
| -4  | 11  | 0 | 0.09  | 0.31 |
| 4   | 11  | 0 | -0.29 | 0.30 |
| -4  | 11  | 0 | 0.71  | 0.32 |
| 5   | -11 | 0 | 0.05  | 0.34 |

-5 -11 0 -0.48 0.42  
-5 11 0 -0.10 0.33  
5 11 0 0.27 0.33  
6 -11 0 -0.09 0.35  
-6 -11 0 -0.84 0.49  
6 11 0 0.10 0.34  
-6 11 0 -0.29 0.32  
-7 -11 0 -0.32 0.48  
7 -11 0 0.69 0.40  
-7 11 0 -0.25 0.34  
7 11 0 0.53 0.38  
-8 -11 0 -0.54 0.57  
8 11 0 0.13 0.41  
-8 11 0 -0.31 0.42  
-9 -11 0 -1.11 0.61  
-9 11 0 -0.20 0.46  
9 11 0 0.34 0.44  
-10 -11 0 -0.91 0.65  
10 11 0 0.44 0.46  
-10 11 0 0.13 0.81  
0 -12 0 1.37 0.47  
0 12 0 0.80 0.37  
1 -12 0 -0.22 0.40  
-1 -12 0 0.32 0.41  
-1 12 0 0.08 0.31  
1 12 0 0.13 0.39  
-1 12 0 0.19 0.38  
-2 -12 0 -0.33 0.45  
2 -12 0 -0.77 0.37  
-2 12 0 0.06 0.36  
2 12 0 0.08 0.38  
3 -12 0 2.83 0.47  
-3 -12 0 4.48 0.67  
3 12 0 3.16 0.47  
-3 12 0 2.97 0.46  
-3 12 0 3.79 0.49  
-4 -12 0 0.91 0.49  
4 -12 0 0.74 0.40  
4 12 0 0.74 0.38  
-4 12 0 1.12 0.39  
-4 12 0 0.82 0.35  
-5 -12 0 0.10 0.54  
5 -12 0 0.22 0.38  
5 12 0 0.13 0.34  
-5 12 0 0.24 0.38  
6 -12 0 0.89 0.42

-6 -12 0 -0.58 0.46  
-6 12 0 0.14 0.39  
6 12 0 0.11 0.37  
-7 -12 0 0.55 0.63  
7 -12 0 0.69 0.44  
-7 12 0 0.13 0.44  
7 12 0 0.06 0.38  
-8 -12 0 -0.24 0.62  
8 12 0 0.15 0.46  
-8 12 0 -0.85 0.42  
-9 -12 0 -0.72 0.62  
9 12 0 -0.79 0.36  
-9 12 0 -0.34 0.48  
0 -13 0 0.01 0.40  
0 13 0 0.35 0.37  
1 -13 0 -0.05 0.44  
-1 -13 0 0.36 0.46  
1 13 0 0.08 0.36  
-1 13 0 0.65 0.38  
2 -13 0 1.74 0.46  
-2 -13 0 1.80 0.56  
-2 13 0 2.08 0.47  
2 13 0 1.38 0.45  
-3 -13 0 -0.43 0.47  
3 -13 0 -0.11 0.40  
-3 13 0 0.34 0.36  
-3 13 0 0.12 0.38  
3 13 0 0.29 0.42  
4 -13 0 0.66 0.44  
-4 -13 0 1.24 0.59  
4 13 0 0.58 0.39  
-4 13 0 0.11 0.57  
-4 13 0 0.70 0.41  
5 -13 0 0.23 0.42  
-5 -13 0 -0.30 0.55  
5 13 0 0.13 0.39  
-5 13 0 -0.25 0.38  
6 -13 0 0.29 0.45  
-6 -13 0 -0.45 0.58  
-6 13 0 0.31 0.43  
6 13 0 -0.31 0.38  
-7 -13 0 0.17 0.65  
7 -13 0 0.36 0.46  
-7 13 0 0.51 0.47  
7 13 0 0.23 0.46  
-8 -13 0 0.20 0.64



-8 13 0 0.33 0.50  
8 13 0 0.40 0.48  
0 -14 0 0.15 0.45  
0 14 0 0.12 0.44  
1 -14 0 0.66 0.45  
-1 -14 0 0.29 0.45  
1 14 0 0.32 0.47  
-1 14 0 -0.40 0.37  
-2 -14 0 0.02 0.54  
2 -14 0 0.03 0.47  
-2 14 0 1.34 0.44  
2 14 0 1.04 0.47  
-3 -14 0 0.77 0.51  
3 -14 0 1.07 0.45  
3 14 0 0.77 0.51  
-3 14 0 1.12 0.45  
-4 -14 0 -0.23 0.54  
4 -14 0 0.33 0.46  
4 14 0 -0.39 0.45  
5 -14 0 0.20 0.46  
-5 -14 0 0.07 0.59  
5 14 0 0.09 0.41  
-5 14 0 -0.28 0.39  
6 -14 0 0.59 0.47  
-6 -14 0 1.21 0.67  
-6 14 0 0.35 0.46  
6 14 0 0.99 0.48  
-7 -14 0 -0.83 0.69  
-7 14 0 -0.81 0.44  
0 -15 0 0.33 0.54  
0 15 0 0.28 0.51  
-1 -15 0 0.44 0.56  
1 -15 0 0.82 0.55  
1 15 0 0.41 0.47  
-1 15 0 1.02 0.48  
2 -15 0 0.45 0.52  
-2 -15 0 0.57 0.59  
-2 15 0 0.25 0.47  
2 15 0 0.08 0.51  
-3 -15 0 -0.09 0.54  
3 -15 0 0.23 0.50  
3 15 0 0.28 0.46  
-3 15 0 0.42 0.48  
-4 -15 0 0.31 0.59  
4 -15 0 1.03 0.51  
4 15 0 -0.14 0.52

|     |     |    |       |      |
|-----|-----|----|-------|------|
| 5   | -15 | 0  | 0.88  | 0.53 |
| -5  | -15 | 0  | 0.20  | 0.62 |
| 6   | -15 | 0  | 0.41  | 0.50 |
| 0   | -16 | 0  | 0.42  | 0.57 |
| 0   | 16  | 0  | 0.41  | 0.48 |
| 1   | -16 | 0  | 0.52  | 0.56 |
| -1  | -16 | 0  | 0.72  | 0.53 |
| -1  | 16  | 0  | 0.93  | 0.50 |
| 1   | 16  | 0  | 0.96  | 0.57 |
| 2   | -16 | 0  | 0.29  | 0.46 |
| 2   | 16  | 0  | -0.23 | 0.52 |
| -2  | 16  | 0  | 0.39  | 0.51 |
| 3   | -16 | 0  | 1.22  | 0.64 |
| -13 | 0   | 1  | -0.44 | 0.36 |
| 13  | 0   | -1 | 0.56  | 0.50 |
| 12  | 0   | -1 | -0.64 | 0.41 |
| -12 | 0   | 1  | 0.15  | 0.41 |
| 11  | 0   | -1 | 0.81  | 0.41 |
| -11 | 0   | 1  | 0.71  | 0.36 |
| -10 | 0   | 1  | 0.04  | 0.33 |
| 10  | 0   | -1 | -0.11 | 0.38 |
| 9   | 0   | -1 | 3.76  | 0.52 |
| -9  | 0   | 1  | 3.75  | 0.38 |
| -9  | 0   | 1  | 4.85  | 0.50 |
| 8   | 0   | -1 | -0.02 | 0.20 |
| -8  | 0   | 1  | 0.02  | 0.22 |
| 8   | 0   | -1 | -0.11 | 0.34 |
| -8  | 0   | 1  | -0.17 | 0.30 |
| 7   | 0   | -1 | 5.86  | 0.50 |
| -7  | 0   | 1  | 5.10  | 0.43 |
| -7  | 0   | 1  | 6.18  | 0.57 |
| -7  | 0   | 1  | 5.94  | 0.38 |
| 7   | 0   | -1 | 6.78  | 0.59 |
| 7   | 0   | -1 | 6.40  | 0.36 |
| -6  | 0   | 1  | 51.32 | 1.22 |
| 6   | 0   | -1 | 51.58 | 1.14 |
| 6   | 0   | -1 | 51.37 | 1.34 |
| -6  | 0   | 1  | 53.11 | 1.33 |
| -6  | 0   | 1  | 52.36 | 1.52 |
| -5  | 0   | 1  | 65.09 | 1.47 |
| 5   | 0   | -1 | 70.42 | 1.75 |
| -5  | 0   | 1  | 63.28 | 1.54 |
| 5   | 0   | -1 | 66.58 | 1.38 |
| -5  | 0   | 1  | 67.80 | 1.75 |
| 5   | 0   | -1 | 67.22 | 1.58 |
| -4  | 0   | 1  | 17.64 | 0.65 |

-4 0 1 18.24 0.48  
4 0 -1 18.06 0.57  
-4 0 1 16.98 0.54  
4 0 -1 16.98 0.64  
4 0 -1 18.70 0.47  
3 0 -1 0.83 0.20  
-3 0 1 0.97 0.13  
-3 0 1 0.73 0.20  
3 0 -1 0.81 0.19  
-3 0 1 1.03 0.12  
-3 0 1 0.98 0.17  
-2 0 1 41.35 0.91  
-2 0 1 42.78 0.85  
-2 0 1 41.53 1.02  
2 0 -1 42.73 0.93  
-2 0 1 41.87 0.87  
-1 0 1 0.71 0.07  
-1 0 1 0.60 0.09  
-1 0 1 0.64 0.07  
1 0 -1 0.84 0.09  
1 0 -1 0.71 0.10  
0 0 1 0.80 0.07  
0 0 1 0.69 0.06  
0 0 1 0.82 0.06  
1 0 1 25.25 0.66  
1 0 1 26.10 0.60  
-1 0 -1 25.01 0.66  
-1 0 -1 25.74 0.57  
1 0 1 25.49 0.50  
1 0 1 26.54 0.59  
2 0 1 3.91 0.14  
2 0 1 4.04 0.27  
2 0 1 4.67 0.32  
-2 0 -1 4.36 0.23  
2 0 1 3.68 0.22  
-2 0 -1 4.51 0.32  
3 0 1 329.85 6.09  
-3 0 -1 333.05 7.15  
3 0 1 321.57 6.68  
3 0 1 322.31 7.13  
-3 0 -1 333.63 6.53  
-4 0 -1 15.33 0.63  
4 0 1 15.73 0.51  
4 0 1 15.28 0.38  
4 0 1 15.62 0.55  
-4 0 -1 15.66 0.52

4 0 1 14.75 0.61  
-4 0 -1 14.78 0.50  
5 0 1 43.60 1.18  
5 0 1 44.73 1.11  
-5 0 -1 44.07 1.34  
5 0 1 43.48 1.30  
5 0 1 45.10 0.93  
-5 0 -1 42.54 1.11  
-5 0 -1 44.02 1.11  
-6 0 -1 0.43 0.23  
6 0 1 1.06 0.36  
-6 0 -1 0.57 0.23  
6 0 1 0.83 0.29  
-6 0 -1 0.42 0.33  
6 0 1 0.43 0.32  
6 0 1 0.51 0.14  
7 0 1 0.16 0.30  
-7 0 -1 0.22 0.28  
8 0 1 2.21 0.44  
-8 0 -1 3.49 0.42  
-9 0 -1 -0.37 0.26  
9 0 1 -0.03 0.33  
-10 0 -1 0.17 0.33  
-10 0 -1 -0.03 0.33  
10 0 1 -0.10 0.37  
11 0 1 -0.23 0.36  
-11 0 -1 0.42 0.39  
-12 0 -1 0.61 0.40  
12 0 1 0.51 0.50  
13 0 1 0.20 0.56  
-13 0 -1 0.29 0.47  
-13 -1 1 -0.34 0.43  
13 -1 -1 -0.32 0.46  
13 1 -1 0.19 0.50  
-13 1 1 0.14 0.38  
12 -1 -1 0.86 0.43  
-12 -1 1 0.59 0.43  
12 1 -1 0.60 0.47  
-12 1 1 0.29 0.37  
11 -1 -1 1.05 0.45  
-11 -1 1 1.44 0.42  
-11 1 1 0.48 0.34  
11 1 -1 0.89 0.43  
10 -1 -1 3.45 0.54  
-10 -1 1 2.47 0.43  
-10 1 1 2.01 0.38

|    |    |    |       |      |
|----|----|----|-------|------|
| 10 | 1  | -1 | 2.16  | 0.42 |
| 9  | -1 | -1 | -0.42 | 0.33 |
| -9 | -1 | 1  | 0.13  | 0.31 |
| -9 | -1 | 1  | 0.06  | 0.26 |
| -9 | 1  | 1  | -0.32 | 0.27 |
| -9 | 1  | 1  | 0.07  | 0.27 |
| 9  | 1  | -1 | -0.59 | 0.29 |
| -8 | -1 | 1  | 7.67  | 0.53 |
| -8 | -1 | 1  | 7.83  | 0.47 |
| 8  | -1 | -1 | 8.16  | 0.39 |
| 8  | -1 | -1 | 7.17  | 0.58 |
| -8 | 1  | 1  | 8.53  | 0.60 |
| -8 | 1  | 1  | 8.39  | 0.45 |
| 8  | 1  | -1 | 7.06  | 0.57 |
| 8  | 1  | -1 | 7.29  | 0.42 |
| -7 | -1 | 1  | 13.40 | 0.54 |
| 7  | -1 | -1 | 13.47 | 0.45 |
| -7 | -1 | 1  | 12.32 | 0.76 |
| -7 | -1 | 1  | 13.41 | 0.64 |
| 7  | -1 | -1 | 13.03 | 0.64 |
| 7  | -1 | -1 | 12.55 | 0.53 |
| 7  | -1 | -1 | 13.31 | 0.77 |
| 7  | 1  | -1 | 14.14 | 0.76 |
| -7 | 1  | 1  | 13.01 | 0.51 |
| 7  | 1  | -1 | 14.16 | 0.49 |
| -7 | 1  | 1  | 12.54 | 0.79 |
| -7 | 1  | 1  | 12.22 | 0.59 |
| 7  | 1  | -1 | 13.41 | 0.67 |
| 6  | -1 | -1 | 12.16 | 0.45 |
| -6 | -1 | 1  | 11.33 | 0.64 |
| -6 | -1 | 1  | 12.09 | 0.55 |
| 6  | -1 | -1 | 12.37 | 0.59 |
| -6 | -1 | 1  | 11.18 | 0.45 |
| 6  | -1 | -1 | 11.20 | 0.40 |
| 6  | 1  | -1 | 11.76 | 0.43 |
| -6 | 1  | 1  | 11.50 | 0.68 |
| -6 | 1  | 1  | 11.41 | 0.54 |
| 6  | 1  | -1 | 12.23 | 0.57 |
| 6  | 1  | -1 | 12.63 | 0.65 |
| -6 | 1  | 1  | 11.99 | 0.43 |
| 5  | -1 | -1 | 30.35 | 0.89 |
| 5  | -1 | -1 | 31.06 | 1.00 |
| -5 | -1 | 1  | 31.29 | 0.79 |
| 5  | -1 | -1 | 30.49 | 0.76 |
| -5 | -1 | 1  | 30.29 | 0.85 |
| -5 | -1 | 1  | 31.45 | 0.98 |

|    |    |    |        |      |
|----|----|----|--------|------|
| -5 | 1  | 1  | 31.55  | 1.02 |
| -5 | 1  | 1  | 31.33  | 0.71 |
| -5 | 1  | 1  | 31.28  | 0.85 |
| 5  | 1  | -1 | 30.89  | 0.98 |
| 5  | 1  | -1 | 31.67  | 0.80 |
| 5  | 1  | -1 | 30.88  | 0.87 |
| -4 | -1 | 1  | 44.60  | 1.08 |
| -4 | -1 | 1  | 47.54  | 1.23 |
| 4  | -1 | -1 | 45.68  | 1.25 |
| 4  | -1 | -1 | 45.69  | 1.13 |
| 4  | -1 | -1 | 45.50  | 1.01 |
| -4 | -1 | 1  | 45.90  | 1.04 |
| -4 | 1  | 1  | 46.36  | 1.10 |
| -4 | 1  | 1  | 46.20  | 0.96 |
| 4  | 1  | -1 | 46.97  | 1.10 |
| 4  | 1  | -1 | 45.50  | 1.22 |
| -4 | 1  | 1  | 44.20  | 1.25 |
| -3 | -1 | 1  | 181.40 | 4.00 |
| 3  | -1 | -1 | 183.70 | 4.04 |
| -3 | -1 | 1  | 179.26 | 3.68 |
| -3 | -1 | 1  | 182.06 | 3.68 |
| 3  | -1 | -1 | 182.80 | 3.77 |
| 3  | -1 | -1 | 182.12 | 3.65 |
| -3 | 1  | 1  | 185.70 | 3.68 |
| -3 | 1  | 1  | 176.97 | 4.04 |
| -3 | 1  | 1  | 185.62 | 3.44 |
| 3  | 1  | -1 | 181.49 | 3.46 |
| 3  | 1  | -1 | 177.93 | 3.73 |
| 3  | 1  | -1 | 184.46 | 4.01 |
| 2  | -1 | -1 | 7.59   | 0.21 |
| -2 | -1 | 1  | 7.15   | 0.28 |
| 2  | -1 | -1 | 7.66   | 0.35 |
| 2  | -1 | -1 | 7.43   | 0.30 |
| -2 | -1 | 1  | 7.13   | 0.26 |
| -2 | -1 | 1  | 6.91   | 0.24 |
| -2 | 1  | 1  | 7.10   | 0.26 |
| 2  | 1  | -1 | 7.17   | 0.25 |
| -2 | 1  | 1  | 7.39   | 0.23 |
| 2  | 1  | -1 | 7.46   | 0.25 |
| 2  | 1  | -1 | 7.44   | 0.29 |
| -2 | 1  | 1  | 7.24   | 0.34 |
| -1 | -1 | 1  | 33.49  | 0.76 |
| 1  | -1 | -1 | 34.06  | 0.71 |
| -1 | -1 | 1  | 33.83  | 0.73 |
| 1  | -1 | -1 | 33.87  | 0.76 |
| 1  | -1 | -1 | 33.02  | 0.82 |

|    |    |    |       |      |
|----|----|----|-------|------|
| 1  | 1  | -1 | 32.76 | 0.68 |
| 1  | 1  | -1 | 33.73 | 0.75 |
| -1 | 1  | 1  | 33.62 | 0.83 |
| 1  | 1  | -1 | 32.97 | 0.70 |
| -1 | 1  | 1  | 34.25 | 0.68 |
| 0  | -1 | 1  | 27.00 | 0.59 |
| 0  | -1 | 1  | 26.58 | 0.61 |
| 0  | -1 | -1 | 27.06 | 0.59 |
| 0  | -1 | 1  | 26.88 | 0.59 |
| 0  | -1 | 1  | 26.63 | 0.57 |
| 0  | -1 | -1 | 28.34 | 0.66 |
| 0  | 1  | 1  | 27.56 | 0.56 |
| 0  | 1  | -1 | 26.46 | 0.61 |
| 0  | 1  | -1 | 26.93 | 0.54 |
| 0  | 1  | 1  | 26.50 | 0.60 |
| 1  | -1 | 1  | 89.49 | 2.00 |
| -1 | -1 | -1 | 89.42 | 2.01 |
| -1 | -1 | -1 | 90.56 | 1.87 |
| 1  | -1 | 1  | 90.86 | 1.67 |
| 1  | -1 | 1  | 90.85 | 1.86 |
| -1 | -1 | -1 | 92.09 | 1.79 |
| 1  | -1 | 1  | 91.12 | 1.86 |
| 1  | 1  | 1  | 90.51 | 1.87 |
| 1  | 1  | 1  | 90.12 | 2.01 |
| -1 | 1  | -1 | 86.97 | 1.67 |
| -1 | 1  | -1 | 81.98 | 1.83 |
| -1 | 1  | -1 | 88.75 | 2.00 |
| -2 | -1 | -1 | 19.80 | 0.49 |
| 2  | -1 | 1  | 19.27 | 0.61 |
| -2 | -1 | -1 | 19.81 | 0.62 |
| 2  | -1 | 1  | 18.68 | 0.52 |
| -2 | -1 | -1 | 17.89 | 0.51 |
| 2  | -1 | 1  | 19.89 | 0.54 |
| -2 | 1  | -1 | 18.98 | 0.60 |
| -2 | 1  | -1 | 19.23 | 0.53 |
| 2  | 1  | 1  | 19.01 | 0.55 |
| 2  | 1  | 1  | 19.82 | 0.61 |
| 2  | 1  | 1  | 18.44 | 0.45 |
| -3 | -1 | -1 | 41.50 | 1.14 |
| -3 | -1 | -1 | 42.18 | 0.96 |
| 3  | -1 | 1  | 40.53 | 1.12 |
| 3  | -1 | 1  | 40.42 | 1.01 |
| -3 | -1 | -1 | 40.89 | 0.99 |
| 3  | -1 | 1  | 41.19 | 0.80 |
| 3  | -1 | 1  | 42.15 | 0.99 |
| 3  | 1  | 1  | 42.12 | 0.87 |

|    |    |    |       |      |
|----|----|----|-------|------|
| -3 | 1  | -1 | 42.60 | 1.14 |
| 3  | 1  | 1  | 41.96 | 1.13 |
| 3  | 1  | 1  | 41.17 | 1.02 |
| -3 | 1  | -1 | 42.50 | 1.00 |
| -4 | -1 | -1 | 85.42 | 2.16 |
| -4 | -1 | -1 | 87.75 | 1.90 |
| 4  | -1 | 1  | 88.09 | 1.98 |
| -4 | -1 | -1 | 84.99 | 1.93 |
| 4  | -1 | 1  | 89.14 | 1.92 |
| 4  | -1 | 1  | 87.01 | 1.66 |
| 4  | -1 | 1  | 86.94 | 2.16 |
| -4 | 1  | -1 | 85.17 | 1.93 |
| 4  | 1  | 1  | 89.92 | 1.73 |
| 4  | 1  | 1  | 86.55 | 2.15 |
| 4  | 1  | 1  | 89.05 | 1.98 |
| -4 | 1  | -1 | 88.79 | 2.17 |
| -5 | -1 | -1 | 4.37  | 0.43 |
| 5  | -1 | 1  | 5.32  | 0.45 |
| -5 | -1 | -1 | 4.85  | 0.35 |
| -5 | -1 | -1 | 4.66  | 0.35 |
| 5  | -1 | 1  | 4.56  | 0.19 |
| 5  | -1 | 1  | 3.98  | 0.38 |
| 5  | -1 | 1  | 5.08  | 0.35 |
| 5  | 1  | 1  | 4.68  | 0.37 |
| 5  | 1  | 1  | 4.46  | 0.24 |
| 5  | 1  | 1  | 4.85  | 0.44 |
| -5 | 1  | -1 | 3.62  | 0.32 |
| -5 | 1  | -1 | 5.32  | 0.47 |
| 6  | -1 | 1  | 1.48  | 0.33 |
| 6  | -1 | 1  | 1.85  | 0.16 |
| 6  | -1 | 1  | 1.66  | 0.35 |
| -6 | -1 | -1 | 1.47  | 0.38 |
| -6 | -1 | -1 | 2.51  | 0.31 |
| -6 | -1 | -1 | 1.86  | 0.27 |
| 6  | 1  | 1  | 1.77  | 0.37 |
| 6  | 1  | 1  | 1.92  | 0.21 |
| -6 | 1  | -1 | 1.94  | 0.31 |
| 6  | 1  | 1  | 1.65  | 0.38 |
| -6 | 1  | -1 | 1.28  | 0.36 |
| 7  | -1 | 1  | 8.13  | 0.52 |
| -7 | -1 | -1 | 7.64  | 0.49 |
| -7 | -1 | -1 | 7.38  | 0.52 |
| -7 | -1 | -1 | 4.83  | 0.81 |
| 7  | -1 | 1  | 6.44  | 0.54 |
| 7  | 1  | 1  | 7.92  | 0.60 |
| 7  | 1  | 1  | 7.72  | 0.36 |



-7 1 -1 7.73 0.54  
8 -1 1 1.06 0.34  
8 -1 1 0.83 0.37  
-8 -1 -1 0.92 0.33  
8 1 1 0.84 0.38  
-8 1 -1 0.84 0.33  
9 -1 1 4.09 0.51  
-9 -1 -1 4.03 0.45  
-9 1 -1 3.99 0.67  
-9 1 -1 3.27 0.44  
9 1 1 2.98 0.49  
-10 -1 -1 2.55 0.41  
10 -1 1 2.96 0.51  
10 1 1 2.40 0.50  
-10 1 -1 2.68 0.48  
-11 -1 -1 1.18 0.40  
11 -1 1 1.36 0.48  
11 1 1 1.27 0.47  
-11 1 -1 1.55 0.46  
-12 -1 -1 0.29 0.43  
12 -1 1 0.47 0.51  
-12 1 -1 0.38 0.45  
12 1 1 0.94 0.49  
-13 -1 -1 0.35 0.46  
13 1 1 0.76 0.51  
-13 1 -1 0.40 0.49  
-13 -2 1 0.15 0.43  
13 -2 -1 0.35 0.50  
-13 2 1 -0.08 0.47  
13 2 -1 0.52 0.50  
12 -2 -1 0.21 0.46  
-12 -2 1 -0.08 0.38  
-12 2 1 0.06 0.37  
12 2 -1 0.24 0.45  
-11 -2 1 0.30 0.36  
11 -2 -1 0.53 0.44  
-11 2 1 0.14 0.38  
11 2 -1 -0.12 0.38  
-10 -2 1 -0.03 0.32  
10 -2 -1 -0.15 0.32  
-10 2 1 0.32 0.35  
10 2 -1 0.29 0.37  
-9 -2 1 1.24 0.36  
9 -2 -1 1.41 0.41  
-9 -2 1 0.46 0.30  
9 2 -1 0.53 0.25

|    |    |    |       |      |
|----|----|----|-------|------|
| 9  | 2  | -1 | 0.59  | 0.36 |
| -9 | 2  | 1  | 1.13  | 0.32 |
| -8 | -2 | 1  | 1.50  | 0.32 |
| 8  | -2 | -1 | 1.01  | 0.28 |
| -8 | -2 | 1  | 0.74  | 0.30 |
| 8  | -2 | -1 | 0.40  | 0.37 |
| 8  | 2  | -1 | 1.10  | 0.35 |
| -8 | 2  | 1  | 0.50  | 0.32 |
| -8 | 2  | 1  | 0.79  | 0.25 |
| 8  | 2  | -1 | 1.06  | 0.25 |
| 7  | -2 | -1 | 8.75  | 0.62 |
| -7 | -2 | 1  | 8.72  | 0.69 |
| 7  | -2 | -1 | 8.90  | 0.37 |
| -7 | -2 | 1  | 8.93  | 0.55 |
| -7 | -2 | 1  | 9.29  | 0.50 |
| -7 | 2  | 1  | 8.94  | 0.52 |
| -7 | 2  | 1  | 9.06  | 0.70 |
| 7  | 2  | -1 | 8.59  | 0.44 |
| 7  | 2  | -1 | 9.24  | 0.58 |
| 7  | 2  | -1 | 9.31  | 0.65 |
| 6  | -2 | -1 | 11.23 | 0.44 |
| -6 | -2 | 1  | 12.88 | 0.66 |
| 6  | -2 | -1 | 10.90 | 0.67 |
| 6  | -2 | -1 | 10.80 | 0.56 |
| -6 | -2 | 1  | 11.15 | 0.49 |
| -6 | -2 | 1  | 11.05 | 0.51 |
| -6 | 2  | 1  | 12.54 | 0.70 |
| 6  | 2  | -1 | 10.68 | 0.54 |
| -6 | 2  | 1  | 11.69 | 0.38 |
| 6  | 2  | -1 | 11.39 | 0.65 |
| -6 | 2  | 1  | 10.50 | 0.51 |
| -5 | -2 | 1  | 29.47 | 0.84 |
| -5 | -2 | 1  | 30.67 | 0.82 |
| 5  | -2 | -1 | 30.51 | 0.77 |
| -5 | -2 | 1  | 29.35 | 0.96 |
| 5  | -2 | -1 | 31.73 | 0.92 |
| 5  | 2  | -1 | 31.75 | 0.98 |
| 5  | 2  | -1 | 30.63 | 0.96 |
| 5  | 2  | -1 | 29.79 | 0.85 |
| -5 | 2  | 1  | 33.38 | 1.05 |
| -5 | 2  | 1  | 30.22 | 0.71 |
| -5 | 2  | 1  | 31.56 | 0.88 |
| -4 | -2 | 1  | 30.73 | 0.90 |
| 4  | -2 | -1 | 30.52 | 0.74 |
| -4 | -2 | 1  | 30.47 | 0.80 |
| -4 | -2 | 1  | 32.21 | 0.89 |

|    |    |    |        |      |
|----|----|----|--------|------|
| 4  | 2  | -1 | 30.09  | 0.90 |
| -4 | 2  | 1  | 30.72  | 0.97 |
| 4  | 2  | -1 | 31.66  | 0.81 |
| -4 | 2  | 1  | 31.11  | 0.69 |
| 4  | 2  | -1 | 31.56  | 0.75 |
| -4 | 2  | 1  | 30.68  | 0.82 |
| 3  | -2 | -1 | 99.30  | 2.15 |
| -3 | -2 | 1  | 97.38  | 2.08 |
| -3 | -2 | 1  | 98.35  | 2.25 |
| 3  | -2 | -1 | 102.00 | 2.34 |
| 3  | -2 | -1 | 98.69  | 2.05 |
| -3 | 2  | 1  | 99.55  | 2.35 |
| -3 | 2  | 1  | 101.23 | 2.10 |
| 3  | 2  | -1 | 98.35  | 2.09 |
| 3  | 2  | -1 | 95.45  | 1.96 |
| 3  | 2  | -1 | 100.38 | 2.25 |
| -3 | 2  | 1  | 97.32  | 1.92 |
| 2  | -2 | -1 | 168.76 | 3.34 |
| 2  | -2 | -1 | 167.58 | 3.67 |
| 2  | -2 | -1 | 164.75 | 3.42 |
| -2 | -2 | 1  | 158.78 | 3.32 |
| -2 | -2 | 1  | 164.88 | 3.56 |
| 2  | 2  | -1 | 165.54 | 3.34 |
| 2  | 2  | -1 | 164.29 | 3.56 |
| -2 | 2  | 1  | 162.31 | 3.12 |
| -2 | 2  | 1  | 167.26 | 3.68 |
| 2  | 2  | -1 | 164.62 | 3.15 |
| -2 | 2  | 1  | 165.73 | 3.32 |
| -1 | -2 | 1  | 77.03  | 1.56 |
| 1  | -2 | -1 | 77.86  | 1.65 |
| -1 | -2 | 1  | 76.19  | 1.64 |
| -1 | -2 | 1  | 76.32  | 1.65 |
| -1 | -2 | 1  | 75.71  | 1.60 |
| 1  | -2 | -1 | 78.21  | 1.62 |
| 1  | -2 | -1 | 76.92  | 1.79 |
| 1  | 2  | -1 | 77.35  | 1.65 |
| -1 | 2  | 1  | 77.76  | 1.79 |
| 1  | 2  | -1 | 76.07  | 1.55 |
| -1 | 2  | 1  | 78.03  | 1.52 |
| 0  | -2 | -1 | 27.11  | 0.65 |
| 0  | -2 | 1  | 27.31  | 0.62 |
| 0  | -2 | 1  | 26.92  | 0.57 |
| 0  | -2 | 1  | 25.73  | 0.63 |
| 0  | -2 | 1  | 26.75  | 0.65 |
| 0  | 2  | 1  | 26.71  | 0.60 |
| 0  | 2  | -1 | 26.97  | 0.62 |

|    |    |    |        |      |
|----|----|----|--------|------|
| 0  | 2  | 1  | 27.60  | 0.57 |
| 0  | 2  | -1 | 26.60  | 0.58 |
| 0  | 2  | 1  | 28.04  | 0.71 |
| 0  | 2  | 1  | 27.19  | 0.63 |
| -1 | -2 | -1 | 74.82  | 1.69 |
| -1 | -2 | -1 | 73.51  | 1.47 |
| 1  | -2 | 1  | 73.70  | 1.56 |
| -1 | -2 | -1 | 70.46  | 1.57 |
| 1  | 2  | 1  | 72.11  | 1.45 |
| -1 | 2  | -1 | 72.21  | 1.40 |
| -1 | 2  | -1 | 73.25  | 1.55 |
| 1  | 2  | 1  | 72.62  | 1.56 |
| -1 | 2  | -1 | 73.25  | 1.65 |
| 1  | 2  | 1  | 73.49  | 1.68 |
| 2  | -2 | 1  | 209.35 | 4.52 |
| 2  | -2 | 1  | 203.92 | 4.20 |
| -2 | -2 | -1 | 206.49 | 4.09 |
| -2 | -2 | -1 | 197.88 | 4.21 |
| 2  | -2 | 1  | 207.99 | 4.22 |
| -2 | -2 | -1 | 213.94 | 4.53 |
| -2 | 2  | -1 | 204.50 | 3.83 |
| 2  | 2  | 1  | 204.85 | 4.23 |
| 2  | 2  | 1  | 207.28 | 4.53 |
| -2 | 2  | -1 | 205.61 | 4.52 |
| 3  | -2 | 1  | 89.96  | 2.17 |
| 3  | -2 | 1  | 90.93  | 2.00 |
| -3 | -2 | -1 | 92.66  | 2.18 |
| -3 | -2 | -1 | 92.94  | 1.99 |
| -3 | -2 | -1 | 92.47  | 1.91 |
| 3  | -2 | 1  | 90.84  | 1.96 |
| -3 | 2  | -1 | 92.15  | 2.18 |
| 3  | 2  | 1  | 91.60  | 2.00 |
| -3 | 2  | -1 | 87.72  | 1.97 |
| -3 | 2  | -1 | 90.73  | 1.71 |
| 3  | 2  | 1  | 87.34  | 2.16 |
| -4 | -2 | -1 | 0.11   | 0.15 |
| 4  | -2 | 1  | -0.26  | 0.21 |
| -4 | -2 | -1 | 0.19   | 0.18 |
| -4 | -2 | -1 | -0.03  | 0.23 |
| 4  | -2 | 1  | 0.36   | 0.18 |
| 4  | -2 | 1  | 0.00   | 0.21 |
| -4 | 2  | -1 | 0.02   | 0.17 |
| 4  | 2  | 1  | 0.16   | 0.14 |
| 4  | 2  | 1  | 0.49   | 0.23 |
| -4 | 2  | -1 | -0.19  | 0.21 |
| 4  | 2  | 1  | 0.01   | 0.20 |

5 -2 1 0.85 0.29  
5 -2 1 0.80 0.28  
-5 -2 -1 1.14 0.31  
-5 -2 -1 1.16 0.21  
5 -2 1 1.12 0.24  
5 -2 1 1.24 0.11  
-5 -2 -1 0.93 0.24  
-5 2 -1 1.26 0.29  
5 2 1 1.03 0.19  
5 2 1 0.91 0.28  
5 2 1 1.33 0.32  
-5 2 -1 1.21 0.28  
6 -2 1 14.60 0.77  
6 -2 1 13.75 0.35  
6 -2 1 14.46 0.58  
-6 -2 -1 14.54 0.59  
-6 -2 -1 14.75 0.81  
6 -2 1 13.08 0.63  
-6 -2 -1 12.24 0.57  
6 2 1 15.15 0.68  
-6 2 -1 12.38 0.59  
6 2 1 16.40 0.79  
-6 2 -1 13.44 0.77  
6 2 1 14.01 0.49  
-7 -2 -1 2.75 0.37  
-7 -2 -1 2.97 0.61  
-7 -2 -1 3.24 0.38  
7 -2 1 2.88 0.46  
7 -2 1 3.09 0.37  
7 2 1 3.39 0.30  
7 2 1 2.60 0.44  
-7 2 -1 3.87 0.42  
8 -2 1 14.24 0.67  
8 -2 1 14.28 0.75  
-8 -2 -1 15.34 0.69  
-8 -2 -1 15.32 0.70  
-8 2 -1 15.20 0.75  
8 2 1 15.36 0.78  
9 -2 1 1.10 0.36  
-9 -2 -1 1.86 0.38  
9 -2 1 2.06 0.47  
-9 2 -1 2.25 0.42  
9 2 1 1.50 0.43  
-9 2 -1 1.29 0.35  
10 -2 1 1.86 0.48  
-10 -2 -1 2.12 0.42

-10 2 -1 1.87 0.43  
10 2 1 1.34 0.41  
11 -2 1 0.16 0.38  
-11 -2 -1 -0.18 0.35  
11 2 1 -0.12 0.42  
-11 2 -1 0.13 0.40  
-12 -2 -1 -0.16 0.39  
12 -2 1 0.17 0.48  
-12 2 -1 -0.25 0.43  
12 2 1 0.14 0.44  
-13 -2 -1 -0.18 0.46  
13 2 1 0.29 0.51  
-13 2 -1 0.23 0.48  
13 -3 -1 0.74 0.51  
-13 -3 1 0.15 0.45  
-13 3 1 -0.34 0.46  
13 3 -1 0.62 0.50  
-12 -3 1 0.95 0.45  
12 -3 -1 1.22 0.52  
-12 3 1 0.42 0.40  
12 3 -1 -0.01 0.45  
-11 -3 1 0.22 0.36  
11 -3 -1 0.36 0.39  
11 3 -1 0.14 0.37  
-11 3 1 -0.36 0.32  
10 -3 -1 0.19 0.40  
-10 -3 1 0.44 0.35  
10 3 -1 0.22 0.35  
-10 3 1 -0.32 0.32  
9 -3 -1 1.19 0.40  
-9 -3 1 0.69 0.31  
-9 -3 1 1.26 0.32  
9 3 -1 1.12 0.39  
-9 3 1 0.81 0.36  
9 3 -1 0.78 0.29  
-8 -3 1 0.08 0.31  
8 -3 -1 -0.23 0.34  
8 -3 -1 0.57 0.25  
-8 -3 1 0.41 0.30  
8 3 -1 0.48 0.33  
8 3 -1 0.22 0.29  
-8 3 1 0.39 0.29  
-7 -3 1 7.20 0.60  
7 -3 -1 10.66 0.67  
7 -3 -1 9.73 0.46  
-7 -3 1 8.73 0.51

-7 -3 1 8.27 0.54  
7 3 -1 9.30 0.57  
7 3 -1 9.37 0.64  
-7 3 1 8.23 0.52  
-7 3 1 8.72 0.36  
-7 3 1 10.08 0.75  
6 -3 -1 5.92 0.36  
6 -3 -1 4.73 0.49  
6 -3 -1 3.93 0.40  
-6 -3 1 5.09 0.46  
-6 -3 1 5.80 0.43  
-6 3 1 5.11 0.28  
6 3 -1 5.06 0.34  
-6 3 1 4.69 0.51  
6 3 -1 5.96 0.47  
6 3 -1 5.45 0.42  
-6 3 1 4.82 0.40  
-5 -3 1 9.59 0.53  
5 -3 -1 9.44 0.39  
-5 -3 1 8.69 0.42  
5 -3 -1 8.48 0.51  
5 -3 -1 9.33 0.58  
-5 3 1 9.05 0.32  
5 3 -1 8.65 0.48  
-5 3 1 9.37 0.47  
5 3 -1 8.59 0.42  
5 3 -1 8.82 0.38  
-5 3 1 9.49 0.60  
4 -3 -1 34.20 0.95  
4 -3 -1 34.60 1.07  
-4 -3 1 34.68 0.99  
4 -3 -1 34.90 0.86  
-4 -3 1 35.10 0.91  
4 3 -1 35.66 0.86  
4 3 -1 35.35 0.99  
-4 3 1 35.00 1.10  
-4 3 1 35.37 0.79  
4 3 -1 34.94 0.88  
-4 3 1 38.96 0.95  
-3 -3 1 58.47 1.33  
-3 -3 1 55.20 1.36  
3 -3 -1 59.45 1.31  
3 -3 -1 58.44 1.38  
3 -3 -1 60.55 1.53  
-3 -3 1 59.57 1.42  
-3 3 1 58.78 1.34

|    |    |    |        |      |
|----|----|----|--------|------|
| 3  | 3  | -1 | 60.02  | 1.28 |
| -3 | 3  | 1  | 57.54  | 1.22 |
| -3 | 3  | 1  | 60.73  | 1.55 |
| 3  | 3  | -1 | 61.30  | 1.42 |
| 3  | 3  | -1 | 59.07  | 1.30 |
| 2  | -3 | -1 | 47.54  | 1.15 |
| 2  | -3 | -1 | 47.28  | 1.10 |
| -2 | -3 | 1  | 48.22  | 1.10 |
| -2 | -3 | 1  | 49.03  | 1.13 |
| -2 | -3 | 1  | 45.63  | 1.16 |
| 2  | -3 | -1 | 50.16  | 1.28 |
| 2  | 3  | -1 | 49.59  | 1.13 |
| -2 | 3  | 1  | 48.85  | 1.03 |
| -2 | 3  | 1  | 50.52  | 1.28 |
| -2 | 3  | 1  | 48.58  | 1.09 |
| 2  | 3  | -1 | 48.90  | 1.06 |
| 2  | 3  | -1 | 47.95  | 1.04 |
| -1 | -3 | 1  | 70.40  | 1.55 |
| -1 | -3 | 1  | 71.88  | 1.54 |
| -1 | -3 | 1  | 72.32  | 1.53 |
| 1  | -3 | -1 | 72.32  | 1.57 |
| -1 | -3 | 1  | 68.29  | 1.58 |
| -1 | 3  | 1  | 74.00  | 1.71 |
| -1 | 3  | 1  | 73.65  | 1.46 |
| 1  | 3  | -1 | 67.93  | 1.45 |
| -1 | 3  | 1  | 73.72  | 1.53 |
| 1  | 3  | -1 | 71.66  | 1.46 |
| 0  | -3 | 1  | 53.03  | 1.11 |
| 0  | -3 | 1  | 53.15  | 1.19 |
| 0  | -3 | 1  | 53.08  | 1.19 |
| 0  | -3 | 1  | 53.74  | 1.22 |
| 0  | -3 | -1 | 54.30  | 1.23 |
| 0  | 3  | 1  | 55.97  | 1.12 |
| 0  | 3  | 1  | 53.71  | 1.29 |
| 0  | 3  | -1 | 53.72  | 1.11 |
| 0  | 3  | 1  | 53.41  | 1.13 |
| 0  | 3  | 1  | 52.93  | 1.18 |
| 0  | 3  | -1 | 53.44  | 1.21 |
| -1 | -3 | -1 | 165.77 | 3.59 |
| 1  | -3 | 1  | 161.59 | 3.32 |
| 1  | -3 | 1  | 164.81 | 3.37 |
| -1 | -3 | -1 | 160.43 | 3.39 |
| 1  | -3 | 1  | 165.46 | 3.56 |
| -1 | -3 | -1 | 165.21 | 3.23 |
| 1  | 3  | 1  | 159.88 | 3.15 |
| -1 | 3  | -1 | 161.32 | 3.56 |



|    |    |    |        |      |
|----|----|----|--------|------|
| 1  | 3  | 1  | 162.34 | 3.35 |
| -1 | 3  | -1 | 162.81 | 3.33 |
| 1  | 3  | 1  | 164.52 | 3.59 |
| -1 | 3  | -1 | 160.55 | 3.10 |
| -2 | -3 | -1 | 41.87  | 1.04 |
| 2  | -3 | 1  | 42.88  | 1.02 |
| -2 | -3 | -1 | 43.25  | 1.11 |
| -2 | -3 | -1 | 43.09  | 0.93 |
| -2 | 3  | -1 | 41.24  | 0.87 |
| 2  | 3  | 1  | 42.78  | 1.01 |
| -2 | 3  | -1 | 41.99  | 1.02 |
| 2  | 3  | 1  | 40.91  | 0.94 |
| 2  | 3  | 1  | 41.85  | 1.11 |
| -2 | 3  | -1 | 41.93  | 1.10 |
| -3 | -3 | -1 | 22.10  | 0.66 |
| -3 | -3 | -1 | 21.67  | 0.73 |
| 3  | -3 | 1  | 21.06  | 0.64 |
| -3 | -3 | -1 | 22.53  | 0.58 |
| 3  | -3 | 1  | 22.36  | 0.64 |
| 3  | -3 | 1  | 21.72  | 0.73 |
| -3 | 3  | -1 | 20.86  | 0.47 |
| -3 | 3  | -1 | 21.52  | 0.74 |
| 3  | 3  | 1  | 22.29  | 0.72 |
| -3 | 3  | -1 | 20.62  | 0.65 |
| 3  | 3  | 1  | 21.61  | 0.64 |
| 3  | 3  | 1  | 21.90  | 0.58 |
| 4  | -3 | 1  | 45.61  | 1.31 |
| -4 | -3 | -1 | 46.24  | 1.18 |
| -4 | -3 | -1 | 45.52  | 1.09 |
| 4  | -3 | 1  | 46.63  | 1.15 |
| 4  | -3 | 1  | 45.89  | 1.18 |
| -4 | -3 | -1 | 48.38  | 1.32 |
| -4 | 3  | -1 | 46.71  | 1.32 |
| 4  | 3  | 1  | 46.64  | 1.30 |
| -4 | 3  | -1 | 44.83  | 0.92 |
| -4 | 3  | -1 | 46.80  | 1.19 |
| 4  | 3  | 1  | 44.81  | 1.16 |
| 5  | -3 | 1  | 20.86  | 0.70 |
| 5  | -3 | 1  | 21.96  | 0.77 |
| 5  | -3 | 1  | 21.75  | 0.88 |
| -5 | -3 | -1 | 22.18  | 0.88 |
| -5 | -3 | -1 | 22.22  | 0.68 |
| -5 | -3 | -1 | 21.00  | 0.74 |
| -5 | 3  | -1 | 20.94  | 0.87 |
| 5  | 3  | 1  | 22.14  | 0.66 |
| 5  | 3  | 1  | 22.41  | 0.86 |

|     |    |    |       |      |
|-----|----|----|-------|------|
| 5   | 3  | 1  | 21.46 | 0.75 |
| -5  | 3  | -1 | 20.87 | 0.74 |
| -5  | 3  | -1 | 21.50 | 0.47 |
| -6  | -3 | -1 | 12.96 | 0.57 |
| 6   | -3 | 1  | 12.59 | 0.57 |
| 6   | -3 | 1  | 13.52 | 0.64 |
| 6   | -3 | 1  | 13.27 | 0.76 |
| -6  | -3 | -1 | 13.11 | 0.59 |
| -6  | -3 | -1 | 14.00 | 0.80 |
| 6   | 3  | 1  | 14.11 | 0.75 |
| 6   | 3  | 1  | 14.12 | 0.53 |
| -6  | 3  | -1 | 13.81 | 0.79 |
| 6   | 3  | 1  | 14.16 | 0.66 |
| -6  | 3  | -1 | 13.68 | 0.67 |
| -7  | -3 | -1 | 10.20 | 1.12 |
| -7  | -3 | -1 | 8.48  | 0.53 |
| 7   | -3 | 1  | 9.35  | 0.61 |
| -7  | -3 | -1 | 8.78  | 0.53 |
| 7   | -3 | 1  | 9.03  | 0.53 |
| 7   | 3  | 1  | 10.36 | 0.64 |
| -7  | 3  | -1 | 9.28  | 0.62 |
| 7   | 3  | 1  | 9.43  | 0.48 |
| -8  | -3 | -1 | 0.50  | 0.30 |
| 8   | -3 | 1  | 0.42  | 0.29 |
| 8   | -3 | 1  | 1.03  | 0.37 |
| -8  | -3 | -1 | 0.54  | 0.30 |
| -8  | 3  | -1 | 0.94  | 0.32 |
| 8   | 3  | 1  | 0.63  | 0.25 |
| 8   | 3  | 1  | 0.22  | 0.34 |
| -9  | -3 | -1 | 0.11  | 0.34 |
| 9   | -3 | 1  | 0.13  | 0.31 |
| -9  | -3 | -1 | 0.89  | 0.33 |
| 9   | -3 | 1  | 0.83  | 0.39 |
| 9   | 3  | 1  | 0.37  | 0.37 |
| -9  | 3  | -1 | 0.68  | 0.36 |
| -9  | 3  | -1 | 0.72  | 0.31 |
| -10 | -3 | -1 | -0.02 | 0.32 |
| 10  | -3 | 1  | 0.69  | 0.40 |
| 10  | 3  | 1  | 0.23  | 0.38 |
| -10 | 3  | -1 | 0.25  | 0.33 |
| -11 | -3 | -1 | 0.61  | 0.39 |
| 11  | -3 | 1  | 0.90  | 0.47 |
| 11  | 3  | 1  | 0.73  | 0.47 |
| -11 | 3  | -1 | 1.00  | 0.45 |
| 12  | -3 | 1  | -0.26 | 0.45 |
| -12 | -3 | -1 | -0.17 | 0.40 |

-12 3 -1 0.01 0.45  
12 3 1 0.43 0.47  
13 3 1 0.61 0.56  
13 -4 -1 0.31 0.53  
-13 -4 1 0.25 0.45  
-13 4 1 -0.40 0.47  
13 4 -1 0.00 0.50  
12 -4 -1 0.06 0.49  
-12 -4 1 0.15 0.41  
12 4 -1 0.33 0.44  
-12 4 1 0.35 0.45  
-11 -4 1 -0.28 0.34  
11 -4 -1 0.20 0.43  
-11 4 1 -0.03 0.38  
11 4 -1 0.39 0.40  
10 -4 -1 0.29 0.40  
-10 -4 1 0.35 0.36  
10 4 -1 -0.05 0.37  
-10 4 1 -0.05 0.29  
9 -4 -1 1.58 0.45  
-9 -4 1 1.74 0.39  
-9 4 1 2.03 0.40  
9 4 -1 2.14 0.42  
-9 4 1 2.10 0.39  
-8 -4 1 -0.32 0.25  
8 -4 -1 0.15 0.37  
8 -4 -1 0.12 0.25  
-8 4 1 0.12 0.27  
8 4 -1 -0.24 0.29  
7 -4 -1 4.39 0.50  
7 -4 -1 4.75 0.38  
-7 -4 1 3.88 0.48  
-7 4 1 5.07 0.46  
-7 4 1 3.99 0.42  
7 4 -1 5.09 0.46  
7 4 -1 4.13 0.37  
-7 4 1 4.17 0.28  
7 4 -1 3.57 0.44  
-6 -4 1 31.64 1.13  
-6 -4 1 30.59 1.07  
6 -4 -1 30.44 1.01  
-6 -4 1 32.52 0.96  
6 -4 -1 32.97 0.89  
6 -4 -1 32.86 1.18  
-6 4 1 31.79 1.00  
6 4 -1 35.03 0.92

|    |    |    |       |      |
|----|----|----|-------|------|
| -6 | 4  | 1  | 31.11 | 0.77 |
| 6  | 4  | -1 | 30.82 | 0.94 |
| -6 | 4  | 1  | 30.14 | 1.19 |
| 6  | 4  | -1 | 31.43 | 1.06 |
| 5  | -4 | -1 | 23.85 | 0.81 |
| 5  | -4 | -1 | 24.50 | 0.92 |
| -5 | -4 | 1  | 22.68 | 0.77 |
| -5 | -4 | 1  | 23.16 | 0.74 |
| 5  | -4 | -1 | 23.10 | 0.69 |
| -5 | -4 | 1  | 22.25 | 0.81 |
| -5 | 4  | 1  | 24.39 | 0.95 |
| 5  | 4  | -1 | 23.28 | 0.80 |
| -5 | 4  | 1  | 22.23 | 0.59 |
| 5  | 4  | -1 | 23.13 | 0.69 |
| 5  | 4  | -1 | 23.52 | 0.70 |
| -5 | 4  | 1  | 21.29 | 0.74 |
| -4 | -4 | 1  | 7.26  | 0.39 |
| 4  | -4 | -1 | 7.27  | 0.36 |
| 4  | -4 | -1 | 8.61  | 0.46 |
| -4 | -4 | 1  | 7.33  | 0.45 |
| 4  | -4 | -1 | 8.18  | 0.52 |
| -4 | -4 | 1  | 7.35  | 0.41 |
| 4  | 4  | -1 | 7.44  | 0.40 |
| 4  | 4  | -1 | 6.55  | 0.34 |
| -4 | 4  | 1  | 7.10  | 0.30 |
| -4 | 4  | 1  | 6.81  | 0.51 |
| -4 | 4  | 1  | 8.07  | 0.42 |
| 4  | 4  | -1 | 7.35  | 0.39 |
| 3  | -4 | -1 | 63.35 | 1.62 |
| 3  | -4 | -1 | 60.52 | 1.46 |
| -3 | -4 | 1  | 62.81 | 1.48 |
| -3 | -4 | 1  | 60.90 | 1.40 |
| 3  | -4 | -1 | 63.18 | 1.41 |
| -3 | -4 | 1  | 60.46 | 1.48 |
| -3 | 4  | 1  | 60.94 | 1.42 |
| -3 | 4  | 1  | 62.80 | 1.65 |
| 3  | 4  | -1 | 62.67 | 1.47 |
| -3 | 4  | 1  | 60.58 | 1.30 |
| 3  | 4  | -1 | 62.12 | 1.36 |
| 3  | 4  | -1 | 61.82 | 1.36 |
| 2  | -4 | -1 | 6.94  | 0.38 |
| -2 | -4 | 1  | 6.37  | 0.32 |
| -2 | -4 | 1  | 6.02  | 0.39 |
| 2  | -4 | -1 | 6.28  | 0.35 |
| -2 | -4 | 1  | 5.72  | 0.27 |
| 2  | -4 | -1 | 6.89  | 0.44 |

-2 4 1 6.76 0.41  
2 4 -1 6.11 0.27  
-2 4 1 6.63 0.29  
2 4 -1 6.23 0.24  
-2 4 1 7.14 0.31  
2 4 -1 6.48 0.32  
-1 -4 1 66.65 1.48  
-1 -4 1 65.30 1.49  
-1 -4 1 67.21 1.48  
-1 -4 1 69.31 1.57  
-1 -4 1 64.86 1.39  
1 -4 -1 67.43 1.54  
-1 4 1 68.59 1.43  
-1 4 1 67.92 1.65  
1 4 -1 68.06 1.42  
-1 4 1 68.58 1.45  
0 -4 1 118.08 2.55  
0 -4 -1 114.85 2.53  
0 -4 1 115.37 2.38  
0 -4 -1 116.46 2.66  
0 -4 1 118.65 2.45  
0 -4 1 113.87 2.50  
0 4 1 117.23 2.34  
0 4 1 118.30 2.37  
0 4 -1 114.90 2.56  
0 4 1 120.20 2.66  
0 4 -1 116.75 2.31  
1 -4 1 74.15 1.57  
-1 -4 -1 74.11 1.76  
1 -4 1 74.53 1.70  
1 -4 1 73.28 1.66  
-1 -4 -1 74.72 1.70  
-1 -4 -1 74.36 1.53  
-1 -4 -1 74.17 1.75  
-1 4 -1 74.20 1.73  
-1 4 -1 71.58 1.50  
1 4 1 71.66 1.55  
1 4 1 73.93 1.61  
-1 4 -1 73.06 1.63  
-2 -4 -1 31.75 0.88  
-2 -4 -1 31.22 0.89  
-2 -4 -1 31.34 0.73  
2 -4 1 31.23 0.84  
2 4 1 30.98 0.89  
-2 4 -1 30.56 0.90  
-2 4 -1 31.86 0.72

|    |    |    |        |      |
|----|----|----|--------|------|
| 2  | 4  | 1  | 30.75  | 0.78 |
| 2  | 4  | 1  | 31.16  | 0.79 |
| -2 | 4  | -1 | 31.55  | 0.85 |
| 3  | -4 | 1  | 99.12  | 2.18 |
| -3 | -4 | -1 | 98.70  | 2.36 |
| 3  | -4 | 1  | 98.15  | 2.36 |
| -3 | -4 | -1 | 98.14  | 2.22 |
| 3  | -4 | 1  | 97.27  | 2.16 |
| -3 | -4 | -1 | 97.87  | 2.06 |
| -3 | 4  | -1 | 100.66 | 2.19 |
| -3 | 4  | -1 | 96.41  | 1.92 |
| -3 | 4  | -1 | 96.83  | 2.37 |
| 3  | 4  | 1  | 98.98  | 2.35 |
| 3  | 4  | 1  | 99.06  | 2.04 |
| 3  | 4  | 1  | 99.45  | 2.17 |
| 4  | -4 | 1  | 30.91  | 0.85 |
| 4  | -4 | 1  | 28.75  | 0.97 |
| -4 | -4 | -1 | 29.93  | 0.79 |
| -4 | -4 | -1 | 30.32  | 0.98 |
| -4 | -4 | -1 | 30.41  | 0.91 |
| 4  | -4 | 1  | 30.37  | 0.88 |
| 4  | 4  | 1  | 29.06  | 0.95 |
| -4 | 4  | -1 | 29.81  | 1.01 |
| 4  | 4  | 1  | 30.81  | 0.86 |
| -4 | 4  | -1 | 29.25  | 0.89 |
| 4  | 4  | 1  | 31.97  | 0.82 |
| -4 | 4  | -1 | 28.72  | 0.66 |
| -5 | -4 | -1 | 2.36   | 0.28 |
| 5  | -4 | 1  | 2.59   | 0.36 |
| -5 | -4 | -1 | 2.88   | 0.38 |
| 5  | -4 | 1  | 2.48   | 0.32 |
| -5 | -4 | -1 | 2.40   | 0.38 |
| 5  | -4 | 1  | 2.08   | 0.35 |
| -5 | 4  | -1 | 2.33   | 0.16 |
| 5  | 4  | 1  | 2.14   | 0.34 |
| 5  | 4  | 1  | 2.08   | 0.36 |
| -5 | 4  | -1 | 2.43   | 0.35 |
| -5 | 4  | -1 | 3.08   | 0.41 |
| 5  | 4  | 1  | 2.56   | 0.30 |
| 6  | -4 | 1  | 19.65  | 0.74 |
| -6 | -4 | -1 | 19.90  | 0.90 |
| -6 | -4 | -1 | 19.33  | 0.78 |
| -6 | -4 | -1 | 19.34  | 0.70 |
| 6  | -4 | 1  | 18.12  | 0.89 |
| 6  | -4 | 1  | 19.38  | 0.80 |
| -6 | 4  | -1 | 18.90  | 0.92 |

|     |    |    |       |      |
|-----|----|----|-------|------|
| 6   | 4  | 1  | 20.17 | 0.77 |
| 6   | 4  | 1  | 19.23 | 0.86 |
| -6  | 4  | -1 | 17.01 | 0.75 |
| -7  | -4 | -1 | 3.17  | 0.44 |
| 7   | -4 | 1  | 3.61  | 0.40 |
| -7  | -4 | -1 | 3.47  | 0.37 |
| 7   | -4 | 1  | 3.66  | 0.50 |
| -7  | 4  | -1 | 3.61  | 0.47 |
| 7   | 4  | 1  | 3.08  | 0.35 |
| 7   | 4  | 1  | 3.10  | 0.42 |
| -8  | -4 | -1 | -0.38 | 0.31 |
| -8  | -4 | -1 | -0.17 | 0.27 |
| 8   | -4 | 1  | -0.18 | 0.27 |
| 8   | -4 | 1  | -0.23 | 0.35 |
| 8   | 4  | 1  | -0.18 | 0.25 |
| 8   | 4  | 1  | -0.10 | 0.33 |
| -8  | 4  | -1 | 0.26  | 0.33 |
| -9  | -4 | -1 | 0.80  | 0.39 |
| -9  | -4 | -1 | 0.56  | 0.32 |
| 9   | -4 | 1  | 0.69  | 0.34 |
| 9   | -4 | 1  | 1.66  | 0.42 |
| 9   | 4  | 1  | 0.95  | 0.40 |
| -9  | 4  | -1 | 0.57  | 0.38 |
| 10  | -4 | 1  | 0.20  | 0.41 |
| -10 | -4 | -1 | -0.77 | 0.36 |
| -10 | -4 | -1 | 0.08  | 0.34 |
| 10  | 4  | 1  | 0.23  | 0.37 |
| -10 | 4  | -1 | -0.14 | 0.33 |
| 11  | -4 | 1  | -0.27 | 0.43 |
| -11 | -4 | -1 | 0.04  | 0.37 |
| 11  | 4  | 1  | 0.14  | 0.44 |
| -11 | 4  | -1 | 0.35  | 0.38 |
| 12  | -4 | 1  | -0.07 | 0.51 |
| -12 | 4  | -1 | 0.56  | 0.44 |
| 12  | 4  | 1  | -0.11 | 0.46 |
| -13 | -5 | 1  | 0.16  | 0.48 |
| 13  | 5  | -1 | 0.62  | 0.55 |
| -13 | 5  | 1  | -0.12 | 0.74 |
| 12  | -5 | -1 | 0.14  | 0.50 |
| -12 | -5 | 1  | 0.28  | 0.44 |
| -12 | 5  | 1  | -0.32 | 0.43 |
| 12  | 5  | -1 | 0.29  | 0.45 |
| 11  | -5 | -1 | 0.30  | 0.46 |
| -11 | -5 | 1  | 0.62  | 0.39 |
| 11  | 5  | -1 | 0.39  | 0.40 |
| -11 | 5  | 1  | 0.25  | 0.35 |

|     |    |    |       |      |
|-----|----|----|-------|------|
| 10  | -5 | -1 | 0.11  | 0.41 |
| -10 | -5 | 1  | 0.18  | 0.35 |
| 10  | 5  | -1 | 0.30  | 0.37 |
| -10 | 5  | 1  | 0.22  | 0.38 |
| 9   | -5 | -1 | -0.15 | 0.38 |
| -9  | -5 | 1  | -0.29 | 0.30 |
| -9  | 5  | 1  | 0.40  | 0.32 |
| 9   | 5  | -1 | -0.30 | 0.27 |
| 9   | 5  | -1 | 0.07  | 0.33 |
| -8  | -5 | 1  | 14.69 | 0.72 |
| 8   | -5 | -1 | 16.29 | 0.83 |
| 8   | -5 | -1 | 15.01 | 0.63 |
| -8  | -5 | 1  | 13.73 | 1.34 |
| -8  | 5  | 1  | 15.54 | 0.75 |
| 8   | 5  | -1 | 14.81 | 0.71 |
| 8   | 5  | -1 | 15.79 | 0.67 |
| 7   | -5 | -1 | 3.94  | 0.37 |
| -7  | -5 | 1  | 3.50  | 0.47 |
| -7  | -5 | 1  | 3.92  | 0.43 |
| -7  | -5 | 1  | 3.88  | 0.46 |
| 7   | -5 | -1 | 3.39  | 0.48 |
| 7   | 5  | -1 | 3.42  | 0.44 |
| 7   | 5  | -1 | 3.98  | 0.38 |
| -7  | 5  | 1  | 3.80  | 0.44 |
| 7   | 5  | -1 | 2.94  | 0.39 |
| -7  | 5  | 1  | 3.79  | 0.29 |
| 6   | -5 | -1 | 5.95  | 0.44 |
| -6  | -5 | 1  | 6.49  | 0.47 |
| 6   | -5 | -1 | 5.13  | 0.55 |
| -6  | -5 | 1  | 5.80  | 0.50 |
| 6   | -5 | -1 | 6.82  | 0.55 |
| -6  | -5 | 1  | 5.93  | 0.52 |
| 6   | 5  | -1 | 5.58  | 0.42 |
| 6   | 5  | -1 | 5.61  | 0.46 |
| -6  | 5  | 1  | 5.10  | 0.32 |
| -6  | 5  | 1  | 5.36  | 0.46 |
| 6   | 5  | -1 | 6.00  | 0.43 |
| -6  | 5  | 1  | 6.87  | 0.63 |
| 5   | -5 | -1 | 0.43  | 0.31 |
| -5  | -5 | 1  | 0.91  | 0.27 |
| -5  | -5 | 1  | 1.02  | 0.35 |
| 5   | -5 | -1 | 0.82  | 0.26 |
| -5  | -5 | 1  | 0.96  | 0.27 |
| 5   | -5 | -1 | 0.97  | 0.32 |
| -5  | 5  | 1  | 0.66  | 0.34 |
| 5   | 5  | -1 | 0.78  | 0.24 |



5 5 -1 0.79 0.25  
-5 5 1 0.74 0.25  
-5 5 1 0.33 0.18  
5 5 -1 1.55 0.27  
4 -5 -1 6.35 0.41  
-4 -5 1 6.57 0.49  
4 -5 -1 5.37 0.46  
-4 -5 1 6.53 0.39  
-4 -5 1 5.32 0.39  
4 -5 -1 6.65 0.45  
-4 5 1 6.69 0.33  
4 5 -1 7.38 0.40  
4 5 -1 5.98 0.34  
4 5 -1 7.00 0.40  
-4 5 1 6.11 0.51  
-4 5 1 6.89 0.42  
3 -5 -1 29.91 0.98  
3 -5 -1 29.02 0.83  
3 -5 -1 28.59 0.86  
-3 -5 1 31.41 0.95  
-3 -5 1 29.52 0.81  
-3 -5 1 29.60 0.81  
3 5 -1 29.49 0.81  
3 5 -1 28.77 0.73  
-3 5 1 29.52 0.76  
3 5 -1 30.10 0.81  
-3 5 1 31.36 1.01  
-3 5 1 31.31 0.84  
-2 -5 1 43.79 1.18  
-2 -5 1 44.05 1.06  
-2 -5 1 42.95 1.06  
2 -5 -1 45.25 1.12  
-2 -5 1 44.52 1.05  
2 5 -1 43.98 1.06  
-2 5 1 44.49 1.03  
2 5 -1 43.33 0.97  
-2 5 1 44.40 1.24  
1 -5 -1 121.35 2.81  
-1 -5 1 120.03 2.63  
-1 -5 1 122.08 2.65  
-1 -5 1 122.26 2.67  
1 -5 -1 119.31 2.60  
-1 -5 1 119.52 2.48  
-1 -5 1 118.90 2.55  
1 -5 -1 120.92 2.65  
-1 5 1 122.72 2.45

|    |    |    |        |      |
|----|----|----|--------|------|
| 1  | 5  | -1 | 120.71 | 2.45 |
| -1 | 5  | 1  | 124.50 | 2.81 |
| -1 | 5  | 1  | 122.21 | 2.52 |
| 0  | -5 | 1  | 37.09  | 0.84 |
| 0  | -5 | 1  | 38.10  | 0.92 |
| 0  | -5 | 1  | 36.67  | 1.00 |
| 0  | -5 | -1 | 37.67  | 0.93 |
| 0  | -5 | -1 | 36.17  | 1.02 |
| 0  | -5 | -1 | 36.74  | 1.03 |
| 0  | 5  | -1 | 37.07  | 0.94 |
| 0  | 5  | -1 | 38.44  | 0.94 |
| 0  | 5  | 1  | 38.44  | 0.88 |
| 0  | 5  | -1 | 38.95  | 0.90 |
| 0  | 5  | 1  | 37.94  | 1.02 |
| 0  | 5  | 1  | 36.56  | 0.92 |
| -1 | -5 | -1 | 4.19   | 0.33 |
| -1 | -5 | -1 | 5.28   | 0.25 |
| -1 | -5 | -1 | 5.22   | 0.43 |
| -1 | -5 | -1 | 4.83   | 0.34 |
| 1  | -5 | 1  | 4.51   | 0.30 |
| 1  | -5 | 1  | 4.68   | 0.26 |
| 1  | -5 | 1  | 5.67   | 0.37 |
| -1 | 5  | -1 | 4.42   | 0.29 |
| -1 | 5  | -1 | 5.42   | 0.32 |
| -1 | 5  | -1 | 4.51   | 0.33 |
| 1  | 5  | 1  | 4.83   | 0.32 |
| 1  | 5  | 1  | 5.18   | 0.30 |
| 2  | -5 | 1  | 39.17  | 0.98 |
| -2 | -5 | -1 | 40.55  | 1.10 |
| -2 | -5 | -1 | 40.02  | 0.92 |
| -2 | -5 | -1 | 38.68  | 1.10 |
| 2  | -5 | 1  | 40.78  | 1.09 |
| 2  | -5 | 1  | 41.96  | 1.07 |
| -2 | 5  | -1 | 41.17  | 1.06 |
| -2 | 5  | -1 | 40.30  | 1.12 |
| 2  | 5  | 1  | 38.80  | 0.99 |
| 2  | 5  | 1  | 39.46  | 0.99 |
| 2  | 5  | 1  | 40.26  | 1.09 |
| -2 | 5  | -1 | 40.74  | 0.92 |
| -3 | -5 | -1 | 1.20   | 0.28 |
| 3  | -5 | 1  | 1.53   | 0.26 |
| -3 | -5 | -1 | 1.80   | 0.21 |
| -3 | -5 | -1 | 1.60   | 0.26 |
| -3 | 5  | -1 | 1.31   | 0.24 |
| -3 | 5  | -1 | 1.36   | 0.18 |
| -3 | 5  | -1 | 1.47   | 0.28 |

|    |    |    |       |      |
|----|----|----|-------|------|
| 3  | 5  | 1  | 1.56  | 0.27 |
| 3  | 5  | 1  | 1.89  | 0.26 |
| 3  | 5  | 1  | 1.80  | 0.28 |
| 4  | -5 | 1  | -0.12 | 0.23 |
| -4 | -5 | -1 | 0.26  | 0.26 |
| -4 | -5 | -1 | -0.15 | 0.18 |
| 4  | -5 | 1  | 0.32  | 0.25 |
| 4  | -5 | 1  | -0.40 | 0.23 |
| -4 | -5 | -1 | 0.45  | 0.27 |
| -4 | 5  | -1 | 0.27  | 0.15 |
| -4 | 5  | -1 | 0.05  | 0.22 |
| -4 | 5  | -1 | 0.40  | 0.27 |
| 4  | 5  | 1  | 0.07  | 0.25 |
| 4  | 5  | 1  | 0.13  | 0.25 |
| 4  | 5  | 1  | -0.43 | 0.21 |
| 5  | -5 | 1  | 13.83 | 0.72 |
| -5 | -5 | -1 | 14.16 | 0.70 |
| -5 | -5 | -1 | 12.04 | 0.66 |
| -5 | -5 | -1 | 11.69 | 0.50 |
| 5  | -5 | 1  | 12.90 | 0.59 |
| 5  | -5 | 1  | 12.22 | 0.62 |
| -5 | 5  | -1 | 13.14 | 0.66 |
| 5  | 5  | 1  | 12.71 | 0.56 |
| 5  | 5  | 1  | 12.56 | 0.68 |
| -5 | 5  | -1 | 12.02 | 0.38 |
| 5  | 5  | 1  | 12.00 | 0.59 |
| -5 | 5  | -1 | 12.84 | 0.77 |
| -6 | -5 | -1 | 3.74  | 0.49 |
| -6 | -5 | -1 | 3.55  | 0.44 |
| 6  | -5 | 1  | 3.28  | 0.44 |
| -6 | -5 | -1 | 4.42  | 0.40 |
| 6  | -5 | 1  | 5.02  | 0.44 |
| -6 | 5  | -1 | 4.07  | 0.44 |
| 6  | 5  | 1  | 4.18  | 0.44 |
| 6  | 5  | 1  | 4.13  | 0.47 |
| -6 | 5  | -1 | 5.12  | 0.57 |
| 6  | 5  | 1  | 4.41  | 0.39 |
| 7  | -5 | 1  | 6.98  | 0.59 |
| 7  | -5 | 1  | 6.79  | 0.52 |
| -7 | -5 | -1 | 6.28  | 0.48 |
| -7 | -5 | -1 | 5.02  | 0.50 |
| 7  | 5  | 1  | 6.13  | 0.53 |
| -7 | 5  | -1 | 4.90  | 0.50 |
| 8  | -5 | 1  | -0.18 | 0.29 |
| -8 | -5 | -1 | 0.00  | 0.35 |
| -8 | -5 | -1 | -0.40 | 0.27 |

8 -5 1 0.36 0.37  
8 5 1 0.33 0.27  
-8 5 -1 -0.05 0.33  
8 5 1 0.10 0.34  
9 -5 1 3.76 0.45  
-9 -5 -1 3.84 0.54  
-9 -5 -1 2.27 0.41  
9 -5 1 3.89 0.56  
-9 5 -1 2.01 0.43  
9 5 1 2.95 0.48  
-10 -5 -1 -0.48 0.40  
10 -5 1 0.41 0.39  
-10 -5 -1 -0.01 0.33  
10 5 1 0.26 0.41  
-10 5 -1 -0.04 0.39  
11 -5 1 -0.42 0.44  
11 5 1 -0.26 0.43  
-11 5 -1 0.28 0.38  
12 -5 1 0.46 0.53  
12 5 1 0.14 0.48  
-12 5 -1 0.44 0.50  
12 -6 -1 0.87 0.55  
-12 6 1 0.22 0.41  
11 -6 -1 0.10 0.44  
-11 -6 1 -0.26 0.37  
11 6 -1 0.32 0.42  
-11 6 1 0.17 0.43  
-10 -6 1 0.31 0.36  
10 -6 -1 -0.34 0.35  
-10 6 1 -0.27 0.32  
10 6 -1 -0.10 0.37  
10 6 -1 -0.16 0.31  
9 -6 -1 3.40 0.52  
-9 -6 1 2.81 0.44  
-9 -6 1 2.13 0.75  
-9 6 1 1.90 0.40  
9 6 -1 2.60 0.45  
9 6 -1 2.87 0.41  
-8 -6 1 5.18 0.49  
8 -6 -1 5.82 0.58  
8 -6 -1 6.39 0.48  
-8 -6 1 6.97 0.61  
8 6 -1 6.09 0.53  
8 6 -1 5.75 0.49  
-8 6 1 5.41 0.53  
7 -6 -1 4.40 0.42

-7 -6 1 5.12 0.54  
-7 -6 1 4.69 0.45  
7 -6 -1 3.71 0.47  
-7 -6 1 4.35 0.49  
7 6 -1 4.67 0.44  
-7 6 1 4.27 0.49  
7 6 -1 4.12 0.44  
7 6 -1 3.61 0.45  
6 -6 -1 9.13 0.54  
-6 -6 1 8.75 0.53  
-6 -6 1 8.36 0.62  
6 -6 -1 8.70 0.64  
-6 -6 1 9.10 0.68  
-6 6 1 10.16 0.76  
-6 6 1 7.93 0.55  
6 6 -1 9.10 0.53  
6 6 -1 9.46 0.54  
6 6 -1 8.53 0.58  
-6 6 1 9.67 0.43  
-5 -6 1 0.37 0.33  
-5 -6 1 0.93 0.27  
5 -6 -1 0.18 0.32  
-5 -6 1 1.06 0.30  
5 -6 -1 0.84 0.28  
5 -6 -1 0.76 0.34  
5 6 -1 0.82 0.26  
5 6 -1 1.06 0.29  
-5 6 1 0.43 0.33  
-5 6 1 0.87 0.27  
5 6 -1 0.75 0.25  
-5 6 1 0.98 0.23  
-4 -6 1 5.32 0.52  
4 -6 -1 4.03 0.40  
4 -6 -1 4.49 0.46  
4 -6 -1 4.94 0.41  
-4 -6 1 4.51 0.35  
-4 -6 1 4.77 0.38  
4 6 -1 5.01 0.40  
-4 6 1 5.12 0.42  
4 6 -1 4.18 0.33  
4 6 -1 4.52 0.31  
-4 6 1 5.56 0.52  
-4 6 1 4.85 0.34  
3 -6 -1 4.87 0.40  
-3 -6 1 4.59 0.32  
3 -6 -1 6.03 0.42

|    |    |    |       |      |
|----|----|----|-------|------|
| -3 | -6 | 1  | 5.01  | 0.48 |
| 3  | -6 | -1 | 5.77  | 0.48 |
| -3 | -6 | 1  | 5.20  | 0.35 |
| -3 | 6  | 1  | 5.69  | 0.36 |
| -3 | 6  | 1  | 4.88  | 0.45 |
| 3  | 6  | -1 | 5.06  | 0.28 |
| 3  | 6  | -1 | 4.40  | 0.32 |
| -3 | 6  | 1  | 4.39  | 0.33 |
| 3  | 6  | -1 | 4.54  | 0.36 |
| -2 | -6 | 1  | 17.67 | 0.51 |
| -2 | -6 | 1  | 16.23 | 0.58 |
| 2  | -6 | -1 | 17.37 | 0.65 |
| -2 | -6 | 1  | 17.08 | 0.52 |
| -2 | -6 | 1  | 15.71 | 0.71 |
| 2  | -6 | -1 | 16.84 | 0.85 |
| 2  | 6  | -1 | 16.75 | 0.60 |
| 2  | 6  | -1 | 16.08 | 0.45 |
| -2 | 6  | 1  | 17.62 | 0.71 |
| -2 | 6  | 1  | 17.43 | 0.58 |
| -1 | -6 | 1  | 27.14 | 0.77 |
| -1 | -6 | 1  | 26.78 | 0.87 |
| -1 | -6 | 1  | 27.24 | 0.70 |
| 1  | -6 | -1 | 28.44 | 0.90 |
| -1 | -6 | 1  | 26.11 | 0.66 |
| 1  | -6 | -1 | 26.40 | 0.78 |
| -1 | -6 | 1  | 27.70 | 0.73 |
| 1  | -6 | -1 | 27.12 | 0.88 |
| -1 | 6  | 1  | 28.51 | 0.88 |
| -1 | 6  | 1  | 27.87 | 0.74 |
| 1  | 6  | -1 | 29.04 | 0.79 |
| -1 | 6  | 1  | 28.50 | 0.78 |
| 0  | -6 | -1 | 25.34 | 0.82 |
| 0  | -6 | -1 | 24.94 | 0.80 |
| 0  | -6 | 1  | 24.19 | 0.68 |
| 0  | -6 | 1  | 25.19 | 0.80 |
| 0  | -6 | -1 | 24.14 | 0.70 |
| 0  | -6 | 1  | 24.18 | 0.61 |
| 0  | 6  | -1 | 25.17 | 0.72 |
| 0  | 6  | -1 | 23.78 | 0.69 |
| 0  | 6  | -1 | 23.74 | 0.71 |
| 0  | 6  | 1  | 25.36 | 0.66 |
| 0  | 6  | 1  | 24.05 | 0.72 |
| 0  | 6  | 1  | 22.84 | 0.76 |
| 1  | -6 | 1  | 93.25 | 1.99 |
| 1  | -6 | 1  | 95.07 | 2.16 |
| 1  | -6 | 1  | 93.48 | 2.14 |

|    |    |    |       |      |
|----|----|----|-------|------|
| -1 | -6 | -1 | 94.09 | 2.20 |
| -1 | -6 | -1 | 94.93 | 2.24 |
| -1 | -6 | -1 | 91.61 | 2.19 |
| -1 | -6 | -1 | 91.19 | 1.97 |
| -1 | 6  | -1 | 91.53 | 2.19 |
| 1  | 6  | 1  | 91.62 | 2.00 |
| -1 | 6  | -1 | 95.05 | 2.09 |
| 1  | 6  | 1  | 92.12 | 2.03 |
| -1 | 6  | -1 | 91.24 | 1.94 |
| -2 | -6 | -1 | 25.26 | 0.66 |
| 2  | -6 | 1  | 24.34 | 0.77 |
| 2  | -6 | 1  | 22.38 | 0.77 |
| -2 | -6 | -1 | 24.79 | 0.79 |
| -2 | -6 | -1 | 23.11 | 0.78 |
| 2  | -6 | 1  | 24.11 | 0.69 |
| -2 | -6 | -1 | 23.00 | 0.84 |
| 2  | 6  | 1  | 23.93 | 0.74 |
| -2 | 6  | -1 | 24.53 | 0.83 |
| 2  | 6  | 1  | 23.65 | 0.70 |
| -2 | 6  | -1 | 24.51 | 0.77 |
| -2 | 6  | -1 | 23.57 | 0.67 |
| -3 | -6 | -1 | 1.10  | 0.20 |
| 3  | -6 | 1  | 1.58  | 0.30 |
| 3  | -6 | 1  | 1.38  | 0.31 |
| -3 | -6 | -1 | 1.29  | 0.37 |
| 3  | -6 | 1  | 1.28  | 0.34 |
| -3 | -6 | -1 | 1.12  | 0.27 |
| -3 | 6  | -1 | 1.24  | 0.21 |
| 3  | 6  | 1  | 1.52  | 0.28 |
| 3  | 6  | 1  | 1.12  | 0.26 |
| 3  | 6  | 1  | 1.48  | 0.28 |
| -3 | 6  | -1 | 1.28  | 0.30 |
| -3 | 6  | -1 | 1.08  | 0.28 |
| 4  | -6 | 1  | 6.91  | 0.52 |
| 4  | -6 | 1  | 6.71  | 0.50 |
| -4 | -6 | -1 | 6.30  | 0.39 |
| -4 | -6 | -1 | 5.23  | 0.47 |
| -4 | -6 | -1 | 7.01  | 0.55 |
| 4  | -6 | 1  | 6.73  | 0.47 |
| 4  | 6  | 1  | 6.42  | 0.44 |
| -4 | 6  | -1 | 6.31  | 0.35 |
| -4 | 6  | -1 | 5.85  | 0.52 |
| -4 | 6  | -1 | 7.59  | 0.55 |
| 4  | 6  | 1  | 6.57  | 0.47 |
| 4  | 6  | 1  | 6.24  | 0.49 |
| 5  | -6 | 1  | 1.34  | 0.36 |

-5 -6 -1 1.13 0.26  
5 -6 1 0.51 0.31  
5 -6 1 0.19 0.31  
-5 -6 -1 0.66 0.32  
-5 -6 -1 0.42 0.33  
-5 6 -1 0.98 0.18  
-5 6 -1 1.46 0.38  
-5 6 -1 0.49 0.31  
5 6 1 0.99 0.33  
5 6 1 0.66 0.30  
5 6 1 0.70 0.27  
6 -6 1 4.99 0.50  
-6 -6 -1 5.92 0.56  
-6 -6 -1 5.15 0.52  
6 -6 1 6.05 0.49  
-6 -6 -1 5.45 0.42  
-6 6 -1 6.45 0.56  
6 6 1 5.22 0.49  
6 6 1 5.89 0.47  
6 6 1 4.96 0.51  
-7 -6 -1 -0.28 0.25  
7 -6 1 1.04 0.33  
-7 -6 -1 0.38 0.38  
7 -6 1 -0.30 0.33  
-7 6 -1 -0.15 0.29  
7 6 1 -0.31 0.27  
7 6 1 0.24 0.32  
8 -6 1 0.63 0.33  
-8 -6 -1 0.46 0.30  
-8 -6 -1 0.81 0.41  
8 -6 1 1.53 0.45  
-8 6 -1 0.53 0.34  
8 6 1 0.85 0.38  
-9 -6 -1 0.38 0.42  
-9 -6 -1 0.64 0.53  
9 -6 1 0.93 0.36  
9 -6 1 0.38 0.38  
-9 6 -1 0.64 0.40  
9 6 1 1.29 0.44  
-10 -6 -1 0.21 0.47  
10 -6 1 1.06 0.51  
10 6 1 0.66 0.45  
-10 6 -1 0.30 0.39  
11 -6 1 0.61 0.49  
11 6 1 0.63 0.49  
-11 6 -1 1.16 0.50



12 -6 1 -0.06 0.53  
-12 6 -1 0.21 0.44  
12 6 1 0.80 0.54  
12 -7 -1 0.97 0.57  
-12 7 1 -0.28 0.46  
11 -7 -1 0.25 0.46  
-11 7 1 -0.07 0.42  
-10 -7 1 -0.02 0.33  
-10 -7 1 -0.31 0.47  
10 -7 -1 -0.42 0.41  
10 7 -1 -0.25 0.36  
-10 7 1 0.29 0.37  
-9 -7 1 1.32 0.38  
9 -7 -1 1.24 0.44  
-9 -7 1 1.62 0.50  
9 7 -1 1.59 0.44  
-9 7 1 1.42 0.40  
9 7 -1 1.44 0.39  
8 -7 -1 4.86 0.59  
-8 -7 1 4.16 0.47  
8 -7 -1 4.56 0.45  
-8 -7 1 3.27 0.54  
8 7 -1 5.10 0.47  
8 7 -1 4.21 0.47  
-8 7 1 3.74 0.51  
-7 -7 1 2.99 0.52  
-7 -7 1 2.93 0.39  
7 -7 -1 3.37 0.39  
7 -7 -1 3.07 0.47  
7 7 -1 2.62 0.38  
-7 7 1 2.85 0.43  
7 7 -1 3.08 0.40  
6 -7 -1 9.94 0.59  
-6 -7 1 10.17 0.64  
-6 -7 1 11.77 0.72  
6 -7 -1 11.39 0.70  
-6 -7 1 10.18 0.57  
6 7 -1 11.84 0.64  
-6 7 1 10.80 0.48  
-6 7 1 10.03 0.65  
6 7 -1 11.44 0.55  
6 7 -1 11.13 0.63  
-5 -7 1 7.42 0.52  
5 -7 -1 6.32 0.58  
5 -7 -1 8.37 0.63  
5 -7 -1 8.45 0.54

-5 -7 1 8.42 0.50  
-5 -7 1 8.26 0.67  
-5 7 1 7.23 0.53  
5 7 -1 7.56 0.51  
5 7 -1 7.93 0.52  
-5 7 1 8.21 0.46  
5 7 -1 7.66 0.46  
-5 7 1 8.05 0.67  
-4 -7 1 7.38 0.61  
4 -7 -1 7.16 0.51  
4 -7 -1 7.37 0.58  
-4 -7 1 8.31 0.46  
4 -7 -1 7.68 0.53  
-4 -7 1 7.34 0.45  
-4 7 1 9.21 0.67  
-4 7 1 7.26 0.45  
4 7 -1 7.58 0.39  
4 7 -1 6.99 0.45  
-4 7 1 8.26 0.51  
4 7 -1 7.92 0.50  
-3 -7 1 2.00 0.23  
-3 -7 1 1.10 0.39  
3 -7 -1 1.60 0.35  
-3 -7 1 1.56 0.22  
-3 -7 1 2.38 0.30  
-3 7 1 1.63 0.30  
3 7 -1 1.76 0.30  
-3 7 1 1.81 0.29  
3 7 -1 1.84 0.21  
-3 7 1 1.92 0.37  
-2 -7 1 10.05 0.36  
-2 -7 1 10.10 0.42  
-2 -7 1 10.56 0.50  
-2 -7 1 11.09 0.69  
2 -7 -1 10.23 0.60  
2 -7 -1 10.26 0.53  
-2 -7 1 10.03 0.39  
2 -7 -1 10.49 0.61  
-2 7 1 11.50 0.60  
2 7 -1 10.44 0.52  
-2 7 1 11.04 0.52  
-1 -7 1 4.85 0.46  
1 -7 -1 4.81 0.41  
-1 -7 1 5.05 0.29  
1 -7 -1 4.97 0.47  
-1 -7 1 5.02 0.28

-1 -7 1 4.91 0.32  
1 -7 -1 5.55 0.39  
-1 -7 1 4.87 0.37  
-1 7 1 5.11 0.33  
1 7 -1 5.06 0.40  
-1 7 1 5.52 0.42  
-1 7 1 5.94 0.41  
0 -7 -1 0.93 0.25  
0 -7 1 0.76 0.17  
0 -7 1 0.67 0.19  
0 -7 -1 0.44 0.22  
0 -7 1 0.68 0.31  
0 -7 -1 0.97 0.34  
0 7 -1 0.50 0.26  
0 7 -1 1.16 0.20  
0 7 1 0.37 0.24  
0 7 1 0.69 0.23  
0 7 -1 0.56 0.22  
0 7 1 1.15 0.20  
-1 -7 -1 1.94 0.27  
1 -7 1 2.10 0.26  
-1 -7 -1 2.21 0.40  
1 -7 1 2.07 0.37  
1 -7 1 2.23 0.24  
-1 -7 -1 2.19 0.30  
-1 7 -1 1.96 0.27  
-1 7 -1 2.24 0.28  
1 7 1 2.08 0.31  
-1 7 -1 2.46 0.32  
-2 -7 -1 24.21 0.81  
-2 -7 -1 24.03 0.83  
2 -7 1 23.18 0.71  
2 -7 1 24.55 0.87  
-2 -7 -1 22.85 0.90  
2 -7 1 23.77 0.80  
-2 -7 -1 23.96 0.68  
-2 7 -1 23.72 0.84  
-2 7 -1 24.49 0.73  
2 7 1 23.74 0.73  
-2 7 -1 23.78 0.81  
2 7 1 24.03 0.79  
3 -7 1 5.08 0.39  
-3 -7 -1 5.63 0.36  
-3 -7 -1 5.64 0.43  
3 -7 1 5.96 0.51  
-3 -7 -1 6.15 0.46

|    |    |    |       |      |
|----|----|----|-------|------|
| 3  | -7 | 1  | 5.23  | 0.44 |
| -3 | -7 | -1 | 5.82  | 0.57 |
| 3  | 7  | 1  | 4.41  | 0.38 |
| -3 | 7  | -1 | 6.65  | 0.53 |
| -3 | 7  | -1 | 5.08  | 0.36 |
| -3 | 7  | -1 | 4.91  | 0.44 |
| 3  | 7  | 1  | 5.35  | 0.44 |
| -4 | -7 | -1 | 16.80 | 0.76 |
| -4 | -7 | -1 | 17.93 | 0.60 |
| -4 | -7 | -1 | 17.04 | 0.81 |
| 4  | -7 | 1  | 16.50 | 0.74 |
| -4 | 7  | -1 | 19.74 | 0.79 |
| -4 | 7  | -1 | 17.00 | 0.84 |
| 4  | 7  | 1  | 16.96 | 0.77 |
| 4  | 7  | 1  | 18.79 | 0.74 |
| 4  | 7  | 1  | 17.66 | 0.67 |
| -4 | 7  | -1 | 17.20 | 0.58 |
| -5 | -7 | -1 | 1.15  | 0.39 |
| 5  | -7 | 1  | 0.96  | 0.35 |
| 5  | -7 | 1  | 1.17  | 0.36 |
| 5  | -7 | 1  | 0.92  | 0.35 |
| -5 | -7 | -1 | 1.46  | 0.35 |
| -5 | -7 | -1 | 1.46  | 0.28 |
| 5  | 7  | 1  | 1.04  | 0.34 |
| 5  | 7  | 1  | 1.25  | 0.34 |
| 5  | 7  | 1  | 1.45  | 0.34 |
| -5 | 7  | -1 | 1.04  | 0.21 |
| -5 | 7  | -1 | 0.81  | 0.39 |
| -5 | 7  | -1 | 0.62  | 0.34 |
| -6 | -7 | -1 | 0.99  | 0.27 |
| 6  | -7 | 1  | 0.28  | 0.34 |
| -6 | -7 | -1 | 1.00  | 0.36 |
| 6  | -7 | 1  | 1.04  | 0.34 |
| -6 | -7 | -1 | 0.67  | 0.37 |
| -6 | 7  | -1 | 0.83  | 0.33 |
| 6  | 7  | 1  | 0.79  | 0.34 |
| 6  | 7  | 1  | 0.21  | 0.32 |
| 6  | 7  | 1  | 0.93  | 0.30 |
| 7  | -7 | 1  | 0.28  | 0.32 |
| 7  | -7 | 1  | 0.96  | 0.40 |
| -7 | -7 | -1 | -0.01 | 0.35 |
| -7 | -7 | -1 | 0.47  | 0.29 |
| 7  | 7  | 1  | 0.22  | 0.31 |
| -7 | 7  | -1 | 0.54  | 0.37 |
| 7  | 7  | 1  | 0.66  | 0.35 |
| 8  | -7 | 1  | 0.91  | 0.36 |

8 -7 1 1.22 0.44  
-8 -7 -1 0.96 0.46  
-8 7 -1 0.39 0.34  
8 7 1 -0.06 0.36  
8 7 1 0.81 0.35  
9 -7 1 2.29 0.50  
-9 -7 -1 2.67 0.57  
9 -7 1 2.92 0.48  
-9 7 -1 1.37 0.46  
9 7 1 1.64 0.41  
9 7 1 1.99 0.47  
-10 -7 -1 0.54 0.54  
10 -7 1 1.30 0.52  
10 7 1 1.33 0.49  
-10 7 -1 1.40 0.52  
11 -7 1 -0.79 0.44  
11 7 1 0.26 0.60  
-11 7 -1 0.01 0.40  
12 -8 -1 0.30 0.57  
11 -8 -1 1.38 0.54  
-11 8 1 0.24 0.48  
-10 -8 1 0.63 0.56  
10 -8 -1 0.12 0.44  
-10 8 1 0.98 0.47  
10 8 -1 -0.31 0.38  
-9 -8 1 0.19 0.34  
-9 -8 1 -0.41 0.47  
9 -8 -1 0.37 0.43  
9 8 -1 0.36 0.38  
-9 8 1 -0.09 0.39  
8 -8 -1 5.15 0.59  
-8 -8 1 4.60 0.49  
-8 -8 1 4.67 0.60  
8 -8 -1 4.92 0.50  
8 8 -1 4.42 0.48  
-8 8 1 5.09 0.57  
7 -8 -1 0.17 0.30  
-7 -8 1 0.17 0.29  
-7 -8 1 -0.50 0.44  
7 -8 -1 0.44 0.39  
-7 8 1 0.50 0.37  
7 8 -1 0.54 0.34  
-6 -8 1 4.71 0.45  
-6 -8 1 4.54 0.61  
6 -8 -1 4.48 0.52  
6 -8 -1 3.96 0.44

-6 8 1 4.64 0.50  
-6 8 1 4.44 0.38  
6 8 -1 4.29 0.45  
5 -8 -1 14.34 0.82  
-5 -8 1 15.25 0.90  
-5 -8 1 14.72 0.65  
5 -8 -1 15.96 0.74  
5 -8 -1 14.21 0.69  
5 8 -1 14.89 0.68  
-5 8 1 15.17 0.60  
-5 8 1 11.89 0.81  
-5 8 1 15.70 0.72  
-4 -8 1 22.39 0.97  
-4 -8 1 23.32 0.78  
4 -8 -1 22.52 0.87  
-4 8 1 23.55 0.84  
-4 8 1 22.48 0.76  
-4 8 1 21.75 0.99  
-3 -8 1 3.54 0.37  
3 -8 -1 2.87 0.44  
-3 -8 1 3.27 0.50  
-3 -8 1 3.62 0.28  
-3 -8 1 3.17 0.29  
3 -8 -1 3.60 0.41  
3 -8 -1 3.13 0.40  
-3 8 1 2.82 0.36  
3 8 -1 1.92 0.34  
-3 8 1 3.26 0.37  
-3 8 1 3.08 0.44  
2 -8 -1 14.47 0.70  
-2 -8 1 15.28 0.61  
-2 -8 1 14.90 0.50  
2 -8 -1 13.82 0.72  
-2 -8 1 16.37 0.84  
-2 -8 1 14.48 0.53  
2 -8 -1 15.25 0.65  
-2 8 1 14.54 0.71  
2 8 -1 15.48 0.65  
-2 8 1 14.61 0.65  
1 -8 -1 13.65 0.69  
-1 -8 1 14.05 0.46  
-1 -8 1 13.39 0.78  
1 -8 -1 15.28 0.72  
1 -8 -1 13.88 0.61  
-1 -8 1 13.48 0.48  
-1 -8 1 13.31 0.52

-1 8 1 13.07 0.65  
-1 8 1 14.05 0.56  
1 8 -1 13.81 0.62  
-1 8 1 14.90 0.66  
0 -8 -1 3.02 0.33  
0 -8 -1 3.17 0.46  
0 -8 1 3.37 0.25  
0 -8 -1 2.79 0.36  
0 -8 1 2.85 0.29  
0 -8 1 2.84 0.46  
0 8 -1 2.55 0.32  
0 8 -1 2.86 0.27  
0 8 1 3.20 0.31  
0 8 -1 2.61 0.35  
0 8 1 2.85 0.40  
1 -8 1 29.37 0.80  
-1 -8 -1 30.22 0.95  
1 -8 1 29.78 0.89  
1 -8 1 28.91 1.01  
-1 -8 -1 29.86 0.98  
-1 -8 -1 29.73 0.87  
-1 -8 -1 30.18 1.07  
-1 8 -1 30.41 0.94  
1 8 1 29.33 0.92  
-1 8 -1 30.21 0.93  
-1 8 -1 30.84 0.88  
1 8 1 29.94 0.83  
2 -8 1 6.08 0.47  
-2 -8 -1 8.41 0.69  
-2 -8 -1 6.90 0.40  
2 -8 1 6.10 0.53  
-2 -8 -1 6.77 0.49  
-2 -8 -1 6.90 0.48  
2 -8 1 7.57 0.44  
-2 8 -1 7.44 0.52  
2 8 1 6.60 0.44  
-2 8 -1 7.08 0.50  
2 8 1 7.52 0.52  
-2 8 -1 6.76 0.47  
-3 -8 -1 6.85 0.50  
3 -8 1 6.85 0.47  
-3 -8 -1 6.73 0.52  
3 -8 1 5.85 0.54  
-3 -8 -1 7.56 0.67  
3 -8 1 6.04 0.49  
-3 -8 -1 6.99 0.40

-3 8 -1 5.80 0.50  
3 8 1 7.03 0.51  
3 8 1 6.14 0.44  
-3 8 -1 6.89 0.57  
-3 8 -1 5.85 0.42  
4 -8 1 1.02 0.32  
-4 -8 -1 0.79 0.29  
-4 -8 -1 0.81 0.23  
-4 -8 -1 0.73 0.30  
-4 -8 -1 0.47 0.40  
4 -8 1 0.50 0.32  
4 -8 1 0.11 0.30  
-4 8 -1 1.09 0.27  
4 8 1 0.79 0.30  
4 8 1 -0.14 0.28  
-4 8 -1 0.75 0.34  
-4 8 -1 0.47 0.34  
5 -8 1 0.58 0.33  
-5 -8 -1 0.67 0.39  
-5 -8 -1 0.43 0.24  
-5 -8 -1 0.78 0.45  
-5 8 -1 0.56 0.31  
-5 8 -1 0.35 0.36  
5 8 1 0.28 0.29  
5 8 1 0.21 0.31  
5 8 1 0.61 0.30  
6 -8 1 0.76 0.34  
-6 -8 -1 -0.45 0.36  
6 -8 1 0.02 0.33  
6 8 1 -0.27 0.29  
-6 8 -1 0.30 0.30  
6 8 1 0.14 0.30  
7 -8 1 0.51 0.34  
7 -8 1 0.94 0.39  
-7 -8 -1 1.01 0.46  
-7 8 -1 0.61 0.40  
7 8 1 0.30 0.30  
7 8 1 0.75 0.37  
8 -8 1 3.00 0.51  
8 -8 1 2.53 0.44  
-8 -8 -1 2.75 0.57  
8 8 1 3.29 0.46  
8 8 1 2.90 0.48  
-8 8 -1 2.89 0.50  
9 -8 1 -0.66 0.38  
-9 -8 -1 -0.20 0.47



9 8 1 0.24 0.31  
-9 8 -1 0.08 0.42  
10 -8 1 1.34 0.54  
-10 -8 -1 0.40 0.57  
-10 8 -1 0.08 0.45  
11 -8 1 0.50 0.52  
-11 8 -1 -0.12 0.42  
11 -9 -1 -0.14 0.52  
-11 9 1 -0.26 0.41  
-10 -9 1 -0.34 0.60  
10 -9 -1 0.67 0.49  
-10 9 1 -0.17 0.38  
10 9 -1 0.70 0.46  
-9 -9 1 0.30 0.54  
9 -9 -1 0.72 0.46  
9 9 -1 2.10 0.43  
-9 9 1 0.50 0.38  
8 -9 -1 0.10 0.39  
-8 -9 1 0.24 0.51  
8 9 -1 -0.39 0.29  
-8 9 1 -0.15 0.36  
7 -9 -1 2.98 0.43  
7 -9 -1 1.87 0.46  
-7 -9 1 1.35 0.55  
-7 -9 1 2.62 0.40  
7 9 -1 1.87 0.42  
-7 9 1 2.19 0.41  
-6 -9 1 3.62 0.40  
6 -9 -1 4.97 0.54  
-6 -9 1 3.34 0.59  
6 -9 -1 3.72 0.45  
-6 9 1 2.87 0.43  
-6 9 1 3.95 0.38  
6 9 -1 4.49 0.50  
5 -9 -1 11.44 0.66  
-5 -9 1 10.77 0.82  
-5 -9 1 10.45 0.56  
5 -9 -1 11.05 0.72  
-5 9 1 12.05 0.58  
5 9 -1 12.50 0.65  
-5 9 1 12.35 0.64  
-4 -9 1 0.09 0.45  
-4 -9 1 0.54 0.28  
4 -9 -1 0.19 0.35  
-4 9 1 0.17 0.35  
-4 9 1 0.17 0.28

-4 9 1 0.39 0.28  
4 9 -1 0.63 0.31  
3 -9 -1 3.09 0.46  
3 -9 -1 3.25 0.47  
-3 -9 1 2.47 0.55  
-3 -9 1 2.46 0.35  
3 -9 -1 2.33 0.38  
3 9 -1 1.95 0.41  
-3 9 1 2.34 0.35  
-3 9 1 3.01 0.40  
-3 9 1 1.97 0.42  
2 -9 -1 8.70 0.64  
-2 -9 1 8.77 0.53  
2 -9 -1 9.72 0.64  
-2 -9 1 8.21 0.67  
2 -9 -1 8.81 0.56  
-2 9 1 8.75 0.63  
-2 9 1 9.29 0.56  
2 9 -1 8.65 0.57  
1 -9 -1 7.46 0.56  
1 -9 -1 8.39 0.52  
1 -9 -1 8.92 0.65  
-1 -9 1 7.23 0.62  
-1 9 1 7.67 0.55  
-1 9 1 8.90 0.56  
-1 9 1 8.49 0.46  
1 9 -1 8.64 0.56  
0 -9 -1 6.19 0.46  
0 -9 -1 5.73 0.49  
0 -9 -1 4.51 0.54  
0 -9 -1 7.24 0.47  
0 -9 1 6.79 0.59  
0 9 1 6.24 0.51  
0 9 -1 6.95 0.51  
0 9 1 6.89 0.43  
0 9 -1 7.10 0.47  
1 -9 1 5.09 0.54  
-1 -9 -1 5.40 0.46  
-1 -9 -1 6.38 0.43  
-1 -9 -1 5.34 0.42  
-1 -9 -1 5.96 0.64  
1 9 1 6.31 0.51  
-1 9 -1 6.08 0.46  
-1 9 -1 4.94 0.43  
-1 9 -1 6.59 0.49  
1 9 1 5.16 0.37

2 -9 1 8.07 0.57  
-2 -9 -1 10.70 0.80  
-2 -9 -1 8.72 0.57  
2 -9 1 10.23 0.49  
-2 -9 -1 8.94 0.74  
2 -9 1 10.81 0.71  
-2 9 -1 9.15 0.58  
-2 9 -1 8.50 0.59  
2 9 1 10.18 0.60  
-2 9 -1 8.31 0.55  
3 -9 1 4.74 0.41  
3 -9 1 3.48 0.49  
-3 -9 -1 4.64 0.60  
3 -9 1 3.59 0.42  
-3 -9 -1 4.32 0.35  
3 9 1 4.58 0.39  
-3 9 -1 4.17 0.47  
-3 9 -1 3.75 0.41  
-3 9 -1 4.82 0.42  
3 9 1 4.11 0.44  
4 -9 1 1.82 0.38  
-4 -9 -1 1.90 0.49  
4 -9 1 1.36 0.37  
4 -9 1 1.83 0.35  
-4 9 -1 1.81 0.40  
4 9 1 2.03 0.37  
-4 9 -1 2.16 0.32  
-4 9 -1 1.34 0.40  
4 9 1 2.36 0.35  
5 -9 1 0.63 0.38  
-5 -9 -1 1.29 0.51  
-5 9 -1 0.21 0.34  
5 9 1 0.32 0.30  
-5 9 -1 0.27 0.42  
-6 -9 -1 1.13 0.52  
6 -9 1 1.83 0.41  
6 -9 1 2.07 0.40  
6 9 1 2.42 0.40  
-6 9 -1 2.30 0.42  
-7 -9 -1 0.49 0.46  
7 -9 1 0.44 0.35  
7 -9 1 0.69 0.38  
-7 9 -1 0.04 0.36  
7 9 1 0.09 0.33  
-8 -9 -1 0.85 0.50  
8 -9 1 0.63 0.42

8 -9 1 0.46 0.37  
8 9 1 -0.25 0.34  
-8 9 -1 -0.27 0.34  
9 -9 1 0.01 0.46  
-9 -9 -1 -0.16 0.54  
-9 9 -1 0.44 0.42  
9 9 1 0.31 0.38  
10 -9 1 0.89 0.53  
-10 -9 -1 -0.89 0.57  
-10 9 -1 0.36 0.43  
11 -9 1 0.71 0.56  
11 -10 -1 0.52 0.56  
11 10 -1 0.03 0.40  
10 -10 -1 1.29 0.53  
-10 -10 1 -0.14 0.63  
10 10 -1 -0.06 0.44  
-10 10 1 0.21 0.43  
9 -10 -1 1.24 0.50  
-9 -10 1 -0.54 0.54  
9 10 -1 0.12 0.38  
-9 10 1 1.46 0.47  
-8 -10 1 0.67 0.50  
8 -10 -1 0.29 0.42  
-8 10 1 0.03 0.41  
8 10 -1 0.40 0.40  
7 -10 -1 -0.08 0.37  
7 -10 -1 -0.09 0.32  
-7 -10 1 0.58 0.52  
7 10 -1 0.25 0.37  
-7 10 1 -0.27 0.33  
6 -10 -1 0.07 0.33  
-6 -10 1 -0.10 0.40  
-6 -10 1 -0.02 0.49  
6 -10 -1 -0.11 0.37  
6 10 -1 -0.26 0.33  
-6 10 1 -0.25 0.32  
5 -10 -1 2.55 0.43  
-5 -10 1 3.69 0.62  
-5 -10 1 3.40 0.41  
-5 10 1 3.37 0.45  
5 10 -1 2.89 0.47  
-5 10 1 3.19 0.39  
4 -10 -1 3.12 0.43  
4 -10 -1 1.46 0.39  
-4 -10 1 1.90 0.34  
-4 -10 1 3.21 0.55

|    |     |    |      |      |
|----|-----|----|------|------|
| -4 | 10  | 1  | 2.76 | 0.40 |
| -4 | 10  | 1  | 1.83 | 0.60 |
| -4 | 10  | 1  | 2.41 | 0.38 |
| 4  | 10  | -1 | 1.58 | 0.40 |
| 3  | -10 | -1 | 8.67 | 0.59 |
| -3 | -10 | 1  | 7.14 | 0.68 |
| -3 | -10 | 1  | 7.81 | 0.49 |
| 3  | -10 | -1 | 8.74 | 0.67 |
| -3 | 10  | 1  | 8.54 | 0.59 |
| -3 | 10  | 1  | 8.37 | 1.06 |
| 3  | 10  | -1 | 7.10 | 0.56 |
| 2  | -10 | -1 | 6.84 | 0.51 |
| 2  | -10 | -1 | 6.56 | 0.61 |
| -2 | -10 | 1  | 6.04 | 0.66 |
| -2 | 10  | 1  | 6.46 | 0.49 |
| 2  | 10  | -1 | 5.53 | 0.51 |
| -2 | 10  | 1  | 7.33 | 0.56 |
| 1  | -10 | -1 | 6.66 | 0.48 |
| -1 | -10 | 1  | 6.21 | 0.64 |
| 1  | -10 | -1 | 4.47 | 0.54 |
| 1  | 10  | -1 | 5.27 | 0.50 |
| -1 | 10  | 1  | 6.16 | 0.46 |
| -1 | 10  | 1  | 5.09 | 0.53 |
| 0  | -10 | 1  | 6.36 | 0.63 |
| 0  | -10 | -1 | 5.38 | 0.59 |
| 0  | 10  | 1  | 6.28 | 0.44 |
| 0  | 10  | -1 | 4.85 | 0.48 |
| 0  | 10  | -1 | 5.43 | 0.49 |
| 0  | 10  | 1  | 5.40 | 0.51 |
| 1  | -10 | 1  | 5.26 | 0.58 |
| -1 | -10 | -1 | 5.31 | 0.65 |
| -1 | 10  | -1 | 4.96 | 0.46 |
| 1  | 10  | 1  | 5.47 | 0.52 |
| -1 | 10  | -1 | 5.53 | 0.49 |
| 1  | 10  | 1  | 5.55 | 0.40 |
| 2  | -10 | 1  | 1.72 | 0.41 |
| -2 | -10 | -1 | 1.47 | 0.47 |
| -2 | 10  | -1 | 2.46 | 0.38 |
| 2  | 10  | 1  | 1.25 | 0.35 |
| -2 | 10  | -1 | 1.73 | 0.34 |
| 3  | -10 | 1  | 4.05 | 0.49 |
| -3 | -10 | -1 | 5.55 | 0.68 |
| -3 | 10  | -1 | 5.44 | 0.46 |
| 3  | 10  | 1  | 4.87 | 0.49 |
| -3 | 10  | -1 | 5.83 | 0.53 |
| -4 | -10 | -1 | 0.11 | 0.49 |

|     |     |    |       |      |
|-----|-----|----|-------|------|
| 4   | -10 | 1  | 1.00  | 0.39 |
| -4  | 10  | -1 | 0.27  | 0.28 |
| 4   | 10  | 1  | 0.74  | 0.32 |
| -4  | 10  | -1 | 1.16  | 0.38 |
| 5   | -10 | 1  | 0.91  | 0.36 |
| 5   | -10 | 1  | 0.94  | 0.35 |
| -5  | -10 | -1 | 0.29  | 0.50 |
| 5   | 10  | 1  | 0.81  | 0.33 |
| -5  | 10  | -1 | 0.53  | 0.36 |
| 6   | -10 | 1  | 0.57  | 0.37 |
| -6  | -10 | -1 | 0.60  | 0.47 |
| 6   | 10  | 1  | 0.03  | 0.36 |
| -6  | 10  | -1 | 0.52  | 0.35 |
| 7   | -10 | 1  | 1.54  | 0.44 |
| 7   | -10 | 1  | 1.00  | 0.41 |
| -7  | -10 | -1 | 0.86  | 0.55 |
| 7   | 10  | 1  | 0.75  | 0.39 |
| -7  | 10  | -1 | 1.01  | 0.43 |
| 8   | -10 | 1  | 0.54  | 0.43 |
| 8   | -10 | 1  | 0.85  | 0.45 |
| -8  | -10 | -1 | -0.44 | 0.56 |
| 8   | 10  | 1  | 0.41  | 0.36 |
| -8  | 10  | -1 | 0.99  | 0.43 |
| 9   | -10 | 1  | 0.96  | 0.52 |
| -9  | -10 | -1 | -0.59 | 0.55 |
| -9  | 10  | -1 | 0.20  | 0.48 |
| 9   | 10  | 1  | 0.99  | 0.44 |
| -10 | -10 | -1 | 0.01  | 0.64 |
| 10  | -10 | 1  | 0.45  | 0.53 |
| -10 | 10  | -1 | 0.65  | 0.48 |
| -10 | -11 | 1  | 0.61  | 0.66 |
| 10  | -11 | -1 | 0.79  | 0.54 |
| -10 | 11  | 1  | -0.62 | 0.47 |
| 10  | 11  | -1 | 0.45  | 0.49 |
| -9  | -11 | 1  | -0.64 | 0.58 |
| 9   | -11 | -1 | 0.07  | 0.49 |
| 9   | 11  | -1 | -0.13 | 0.44 |
| -9  | 11  | 1  | -0.32 | 0.44 |
| 8   | -11 | -1 | -0.67 | 0.43 |
| -8  | -11 | 1  | -0.09 | 0.58 |
| -8  | 11  | 1  | -0.10 | 0.43 |
| 8   | 11  | -1 | -0.34 | 0.35 |
| -7  | -11 | 1  | 2.16  | 0.63 |
| 7   | -11 | -1 | 2.56  | 0.50 |
| 7   | -11 | -1 | 1.41  | 0.43 |
| 7   | 11  | -1 | 2.05  | 0.45 |

|    |     |    |       |      |
|----|-----|----|-------|------|
| -7 | 11  | 1  | 2.17  | 0.49 |
| 6  | -11 | -1 | 0.98  | 0.39 |
| -6 | -11 | 1  | 0.78  | 0.54 |
| 6  | 11  | -1 | 0.29  | 0.35 |
| -6 | 11  | 1  | 0.49  | 0.38 |
| 5  | -11 | -1 | 0.65  | 0.44 |
| -5 | -11 | 1  | 0.08  | 0.51 |
| 5  | -11 | -1 | 0.87  | 0.38 |
| -5 | 11  | 1  | 0.25  | 0.33 |
| -5 | 11  | 1  | 0.65  | 0.31 |
| 5  | 11  | -1 | 0.26  | 0.31 |
| -4 | -11 | 1  | 3.56  | 0.58 |
| -4 | -11 | 1  | 4.37  | 0.44 |
| 4  | -11 | -1 | 3.97  | 0.54 |
| -4 | 11  | 1  | 4.54  | 0.49 |
| -4 | 11  | 1  | 3.62  | 0.47 |
| 4  | 11  | -1 | 3.62  | 0.47 |
| -3 | -11 | 1  | 0.86  | 0.44 |
| 3  | -11 | -1 | 1.01  | 0.42 |
| -3 | -11 | 1  | 1.07  | 0.31 |
| -3 | 11  | 1  | 1.22  | 0.37 |
| 3  | 11  | -1 | 0.95  | 0.39 |
| 2  | -11 | -1 | 9.20  | 0.73 |
| -2 | -11 | 1  | 7.71  | 0.70 |
| -2 | 11  | 1  | 9.49  | 0.56 |
| 2  | 11  | -1 | 9.55  | 0.56 |
| 2  | 11  | -1 | 9.39  | 0.64 |
| -2 | 11  | 1  | 9.16  | 0.61 |
| -1 | -11 | 1  | -0.07 | 0.36 |
| 1  | -11 | -1 | 0.00  | 0.41 |
| -1 | 11  | 1  | 0.29  | 0.26 |
| -1 | 11  | 1  | 0.19  | 0.32 |
| 1  | 11  | -1 | 0.68  | 0.37 |
| 0  | -11 | 1  | 3.78  | 0.56 |
| 0  | -11 | -1 | 3.82  | 0.56 |
| 0  | 11  | -1 | 5.20  | 0.52 |
| 0  | 11  | 1  | 5.58  | 0.56 |
| 1  | -11 | 1  | 10.11 | 0.70 |
| -1 | -11 | -1 | 8.48  | 0.73 |
| 1  | 11  | 1  | 8.42  | 0.63 |
| -1 | 11  | -1 | 9.27  | 0.59 |
| -1 | 11  | -1 | 10.48 | 0.67 |
| 2  | -11 | 1  | -0.14 | 0.39 |
| -2 | -11 | -1 | 0.65  | 0.50 |
| 2  | 11  | 1  | 0.20  | 0.32 |
| -2 | 11  | -1 | 0.64  | 0.34 |

-2 11 -1 0.34 0.31  
-3 -11 -1 1.10 0.48  
3 -11 1 1.65 0.42  
3 11 1 1.07 0.36  
-3 11 -1 1.34 0.38  
-3 11 -1 1.36 0.36  
-4 -11 -1 -0.88 0.46  
4 -11 1 0.46 0.40  
4 11 1 0.36 0.36  
-4 11 -1 0.40 0.35  
-4 11 -1 -0.06 0.30  
-5 -11 -1 0.07 0.52  
5 -11 1 0.29 0.38  
5 11 1 -0.14 0.30  
-5 11 -1 0.38 0.38  
-6 -11 -1 -0.33 0.52  
6 -11 1 -0.26 0.35  
6 11 1 -0.39 0.31  
-6 11 -1 -0.01 0.37  
7 -11 1 1.00 0.43  
-7 -11 -1 1.01 0.58  
-7 11 -1 -0.51 0.33  
7 11 1 0.18 0.35  
-8 -11 -1 -0.71 0.60  
8 -11 1 -0.09 0.43  
-8 11 -1 0.22 0.41  
8 11 1 0.21 0.37  
-9 -11 -1 -1.02 0.61  
9 11 1 -0.47 0.40  
-9 11 -1 0.03 0.44  
-10 -11 -1 -0.99 0.69  
-10 -12 1 -0.85 0.64  
-9 -12 1 0.09 0.65  
-9 12 1 -0.84 0.42  
9 12 -1 0.08 0.47  
-8 -12 1 -0.44 0.60  
8 12 -1 0.49 0.44  
-8 12 1 1.15 0.50  
7 -12 -1 0.43 0.41  
-7 -12 1 0.20 0.60  
-7 12 1 -0.19 0.42  
7 12 -1 0.48 0.46  
6 -12 -1 0.27 0.40  
-6 -12 1 1.67 0.62  
-6 12 1 0.50 0.39  
6 12 -1 0.79 0.40



-5 -12 1 0.37 0.52  
5 -12 -1 0.32 0.32  
-5 12 1 0.29 0.36  
5 12 -1 0.67 0.39  
-5 12 1 -0.05 0.34  
-4 -12 1 -0.03 0.42  
4 -12 -1 0.59 0.39  
-4 12 1 -0.15 0.32  
-4 12 1 0.28 0.34  
4 12 -1 -0.12 0.35  
-3 -12 1 7.96 0.75  
3 -12 -1 10.44 0.76  
3 12 -1 9.09 0.69  
-3 12 1 10.55 0.70  
2 -12 -1 0.69 0.45  
-2 -12 1 1.38 0.51  
2 12 -1 1.06 0.40  
-2 12 1 2.03 0.45  
-1 -12 1 0.38 0.41  
1 -12 -1 -0.19 0.42  
1 12 -1 0.08 0.31  
-1 12 1 -0.37 0.31  
1 12 -1 0.18 0.37  
0 -12 -1 1.25 0.49  
0 -12 1 1.58 0.50  
0 12 -1 1.53 0.40  
0 12 1 0.93 0.38  
1 -12 1 0.07 0.42  
-1 -12 -1 -0.16 0.45  
-1 12 -1 -0.24 0.29  
1 12 1 -0.23 0.33  
-1 12 -1 -0.40 0.34  
2 -12 1 0.01 0.40  
-2 -12 -1 0.52 0.49  
-2 12 -1 0.00 0.30  
2 12 1 0.35 0.36  
-2 12 -1 0.87 0.35  
3 -12 1 0.00 0.41  
-3 -12 -1 0.14 0.50  
3 12 1 0.83 0.41  
-3 12 -1 0.23 0.34  
-3 12 -1 0.90 0.36  
4 -12 1 0.23 0.40  
-4 -12 -1 1.26 0.56  
4 12 1 0.93 0.38  
-4 12 -1 0.54 0.39

|    |     |    |       |      |
|----|-----|----|-------|------|
| -5 | -12 | -1 | 0.00  | 0.48 |
| 5  | -12 | 1  | -0.08 | 0.38 |
| 5  | 12  | 1  | 0.06  | 0.34 |
| -5 | 12  | -1 | -0.33 | 0.36 |
| -6 | -12 | -1 | 0.14  | 0.52 |
| 6  | -12 | 1  | -0.39 | 0.36 |
| -6 | 12  | -1 | -0.24 | 0.39 |
| 6  | 12  | 1  | -0.11 | 0.39 |
| 7  | -12 | 1  | 0.04  | 0.42 |
| -7 | -12 | -1 | -0.69 | 0.52 |
| -7 | 12  | -1 | 0.44  | 0.45 |
| 7  | 12  | 1  | 0.09  | 0.41 |
| -8 | -12 | -1 | -0.58 | 0.66 |
| 8  | 12  | 1  | -0.26 | 0.43 |
| -8 | 12  | -1 | 0.74  | 0.52 |
| -9 | -12 | -1 | -1.73 | 0.60 |
| 9  | 12  | 1  | 0.07  | 0.40 |
| -9 | -13 | 1  | -0.34 | 0.69 |
| -9 | 13  | 1  | -0.45 | 0.73 |
| -8 | -13 | 1  | -0.10 | 0.63 |
| 8  | 13  | -1 | 0.31  | 0.50 |
| -8 | 13  | 1  | 0.58  | 0.50 |
| -7 | -13 | 1  | 1.03  | 0.65 |
| 7  | 13  | -1 | 0.72  | 0.45 |
| -7 | 13  | 1  | 0.24  | 0.45 |
| 6  | -13 | -1 | -0.12 | 0.42 |
| -6 | -13 | 1  | 0.28  | 0.58 |
| 6  | 13  | -1 | 0.26  | 0.42 |
| -6 | 13  | 1  | -0.27 | 0.39 |
| 5  | -13 | -1 | 0.58  | 0.41 |
| -5 | -13 | 1  | -0.56 | 0.44 |
| -5 | 13  | 1  | -0.10 | 0.37 |
| 5  | 13  | -1 | 0.09  | 0.46 |
| -4 | -13 | 1  | -0.23 | 0.51 |
| 4  | -13 | -1 | -0.04 | 0.41 |
| -4 | 13  | 1  | 0.26  | 0.40 |
| 4  | 13  | -1 | -0.21 | 0.42 |
| 3  | -13 | -1 | 0.30  | 0.42 |
| -3 | -13 | 1  | -0.85 | 0.45 |
| -3 | 13  | 1  | 0.20  | 0.38 |
| 3  | 13  | -1 | 0.05  | 0.41 |
| -2 | -13 | 1  | 2.09  | 0.52 |
| 2  | -13 | -1 | 2.17  | 0.51 |
| -2 | 13  | 1  | 2.21  | 0.46 |
| 2  | 13  | -1 | 1.54  | 0.46 |
| -1 | -13 | 1  | 0.84  | 0.45 |

|    |     |    |       |      |
|----|-----|----|-------|------|
| 1  | -13 | -1 | 0.98  | 0.49 |
| 1  | 13  | -1 | 0.97  | 0.45 |
| -1 | 13  | 1  | 0.25  | 0.38 |
| 0  | -13 | 1  | 0.64  | 0.49 |
| 0  | -13 | -1 | 0.52  | 0.43 |
| 0  | 13  | -1 | 1.26  | 0.40 |
| 0  | 13  | 1  | 0.42  | 0.43 |
| -1 | -13 | -1 | 0.96  | 0.52 |
| 1  | -13 | 1  | 0.22  | 0.42 |
| -1 | 13  | -1 | -0.24 | 0.40 |
| 1  | 13  | 1  | 0.02  | 0.36 |
| -2 | -13 | -1 | 2.36  | 0.55 |
| 2  | -13 | 1  | 1.17  | 0.43 |
| 2  | 13  | 1  | 0.78  | 0.45 |
| -2 | 13  | -1 | 0.93  | 0.42 |
| -2 | 13  | -1 | 1.26  | 0.40 |
| 3  | -13 | 1  | 2.29  | 0.50 |
| -3 | -13 | -1 | 2.42  | 0.62 |
| 3  | 13  | 1  | 0.19  | 0.39 |
| -3 | 13  | -1 | 1.38  | 0.41 |
| -3 | 13  | -1 | 1.61  | 0.45 |
| -4 | -13 | -1 | -0.02 | 0.56 |
| 4  | -13 | 1  | 0.47  | 0.38 |
| -4 | 13  | -1 | -0.10 | 0.36 |
| 4  | 13  | 1  | 0.04  | 0.39 |
| -5 | -13 | -1 | -0.10 | 0.60 |
| 5  | -13 | 1  | 0.57  | 0.45 |
| -5 | 13  | -1 | 0.03  | 0.41 |
| 5  | 13  | 1  | 0.10  | 0.45 |
| -6 | -13 | -1 | 0.63  | 0.65 |
| 6  | -13 | 1  | 0.67  | 0.47 |
| -6 | 13  | -1 | 0.57  | 0.44 |
| 6  | 13  | 1  | 0.53  | 0.42 |
| 7  | -13 | 1  | 0.19  | 0.47 |
| -7 | -13 | -1 | -0.45 | 0.64 |
| 7  | 13  | 1  | -0.09 | 0.39 |
| -7 | 13  | -1 | -0.12 | 0.44 |
| -8 | -13 | -1 | -1.15 | 0.92 |
| 8  | 13  | 1  | 0.03  | 0.49 |
| -8 | 13  | -1 | 0.28  | 0.52 |
| -8 | 14  | 1  | -0.20 | 0.54 |
| -7 | -14 | 1  | -0.52 | 0.60 |
| 7  | 14  | -1 | -0.32 | 0.50 |
| -6 | -14 | 1  | -0.35 | 0.56 |
| 6  | -14 | -1 | -0.08 | 0.45 |
| 6  | 14  | -1 | 0.37  | 0.53 |

-5 -14 1 0.54 0.59  
5 -14 -1 0.68 0.46  
5 14 -1 0.36 0.45  
-4 -14 1 0.20 0.57  
4 -14 -1 0.07 0.45  
-4 14 1 0.24 0.44  
4 14 -1 0.25 0.41  
3 -14 -1 0.03 0.44  
-3 -14 1 -0.33 0.50  
3 14 -1 0.63 0.42  
-3 14 1 -0.14 0.42  
2 -14 -1 0.28 0.47  
-2 -14 1 0.58 0.49  
-2 14 1 -0.46 0.37  
2 14 -1 0.51 0.49  
1 -14 -1 0.69 0.52  
-1 -14 1 -0.64 0.47  
1 14 -1 0.09 0.46  
-1 14 1 0.16 0.47  
0 -14 -1 0.05 0.49  
0 -14 1 0.32 0.44  
0 14 -1 0.06 0.44  
0 14 1 0.09 0.40  
-1 -14 -1 -0.09 0.50  
1 -14 1 0.12 0.42  
1 14 1 0.08 0.41  
-1 14 -1 0.22 0.37  
2 -14 1 0.61 0.50  
-2 -14 -1 -0.70 0.52  
2 14 1 0.36 0.48  
-2 14 -1 0.33 0.44  
-3 -14 -1 0.24 0.49  
3 -14 1 1.31 0.54  
-3 14 -1 0.24 0.41  
3 14 1 0.56 0.45  
4 -14 1 -0.09 0.40  
-4 -14 -1 0.20 0.60  
-4 14 -1 -0.39 0.40  
4 14 1 -0.03 0.41  
-5 -14 -1 -0.78 0.50  
5 -14 1 0.15 0.44  
5 14 1 0.31 0.47  
-5 14 -1 -0.14 0.42  
-6 -14 -1 -0.19 0.56  
6 -14 1 0.44 0.48  
6 14 1 -0.50 0.43

-6 14 -1 0.37 0.44  
7 -14 1 0.51 0.50  
-7 14 -1 0.87 0.52  
6 -15 -1 0.60 0.50  
5 -15 -1 0.40 0.45  
-5 -15 1 -0.22 0.59  
5 15 -1 -0.67 0.43  
4 -15 -1 0.44 0.44  
-4 -15 1 0.83 0.61  
4 15 -1 -0.18 0.45  
3 -15 -1 0.76 0.51  
-3 -15 1 0.97 0.55  
3 15 -1 0.09 0.45  
-3 15 1 0.01 0.48  
2 -15 -1 -0.09 0.47  
-2 -15 1 -0.05 0.53  
-2 15 1 0.44 0.47  
2 15 -1 0.10 0.43  
-1 -15 1 0.83 0.58  
1 -15 -1 0.48 0.55  
1 15 -1 -0.53 0.46  
-1 15 1 0.54 0.47  
0 -15 -1 -0.17 0.52  
0 -15 1 1.04 0.59  
0 15 1 0.73 0.47  
0 15 -1 0.72 0.50  
1 -15 1 0.33 0.46  
-1 -15 -1 0.22 0.55  
-1 15 -1 0.50 0.46  
1 15 1 0.34 0.45  
-2 -15 -1 0.42 0.56  
2 -15 1 0.17 0.43  
2 15 1 0.05 0.46  
-2 15 -1 0.52 0.50  
-3 -15 -1 -0.18 0.57  
3 -15 1 0.51 0.52  
3 15 1 0.16 0.52  
-4 -15 -1 1.80 0.69  
4 -15 1 0.32 0.50  
4 15 1 0.19 0.49  
5 -15 1 0.98 0.51  
-6 15 -1 0.56 0.51  
4 -16 -1 0.07 0.86  
3 -16 -1 0.93 0.53  
-3 16 1 0.23 0.50  
2 -16 -1 -0.16 0.51

|     |     |    |        |      |
|-----|-----|----|--------|------|
| 2   | 16  | -1 | 0.66   | 0.49 |
| -2  | 16  | 1  | 0.48   | 0.53 |
| 1   | -16 | -1 | 0.40   | 0.55 |
| -1  | -16 | 1  | 0.54   | 0.58 |
| 1   | 16  | -1 | -0.77  | 0.49 |
| -1  | 16  | 1  | -0.15  | 0.45 |
| 0   | -16 | -1 | 0.17   | 0.48 |
| 0   | -16 | 1  | 0.33   | 0.49 |
| 0   | 16  | -1 | 0.01   | 0.47 |
| 0   | 16  | 1  | -0.45  | 0.46 |
| 1   | -16 | 1  | 0.14   | 0.49 |
| -1  | -16 | -1 | 0.75   | 0.63 |
| -1  | 16  | -1 | 0.04   | 0.50 |
| 1   | 16  | 1  | -0.35  | 0.45 |
| 2   | -16 | 1  | 0.71   | 0.62 |
| -14 | 0   | 2  | -0.22  | 0.41 |
| 14  | 0   | -2 | 0.35   | 0.68 |
| -13 | 0   | 2  | -0.45  | 0.42 |
| 13  | 0   | -2 | 1.14   | 0.52 |
| 12  | 0   | -2 | -0.15  | 0.42 |
| -12 | 0   | 2  | 0.22   | 0.41 |
| -11 | 0   | 2  | 3.17   | 0.50 |
| 11  | 0   | -2 | 1.94   | 0.45 |
| 10  | 0   | -2 | 0.18   | 0.37 |
| -10 | 0   | 2  | -0.10  | 0.29 |
| 9   | 0   | -2 | -0.45  | 0.28 |
| 9   | 0   | -2 | -0.17  | 0.23 |
| -9  | 0   | 2  | 0.27   | 0.29 |
| 8   | 0   | -2 | 0.00   | 0.21 |
| -8  | 0   | 2  | 0.43   | 0.29 |
| -8  | 0   | 2  | -0.08  | 0.20 |
| 8   | 0   | -2 | 0.14   | 0.34 |
| 7   | 0   | -2 | 23.09  | 0.67 |
| -7  | 0   | 2  | 20.99  | 0.77 |
| -7  | 0   | 2  | 22.09  | 0.64 |
| -7  | 0   | 2  | 21.42  | 0.95 |
| 7   | 0   | -2 | 21.84  | 0.80 |
| -6  | 0   | 2  | 98.53  | 2.31 |
| -6  | 0   | 2  | 104.83 | 2.20 |
| 6   | 0   | -2 | 106.62 | 2.15 |
| 6   | 0   | -2 | 106.66 | 2.60 |
| -6  | 0   | 2  | 104.18 | 2.61 |
| -5  | 0   | 2  | 0.59   | 0.26 |
| 5   | 0   | -2 | 0.54   | 0.23 |
| -5  | 0   | 2  | 0.56   | 0.12 |
| -5  | 0   | 2  | 0.29   | 0.19 |

5 0 -2 0.50 0.22  
-4 0 2 10.97 0.35  
4 0 -2 10.21 0.43  
4 0 -2 9.90 0.49  
-4 0 2 9.73 0.51  
-4 0 2 10.18 0.40  
-4 0 2 10.20 0.29  
-3 0 2 334.98 7.16  
-3 0 2 328.81 6.18  
-3 0 2 328.20 6.55  
-3 0 2 324.92 6.53  
3 0 -2 334.31 7.14  
3 0 -2 328.54 6.68  
-2 0 2 217.23 4.43  
2 0 -2 224.77 4.85  
2 0 -2 225.40 4.54  
2 0 -2 216.70 4.41  
-2 0 2 227.28 4.41  
-2 0 2 224.46 4.20  
-2 0 2 226.05 4.86  
-1 0 2 166.62 3.70  
1 0 -2 169.97 3.71  
-1 0 2 174.33 3.40  
-1 0 2 171.95 3.21  
0 0 -2 0.58 0.12  
0 0 2 0.74 0.12  
0 0 2 1.25 0.12  
0 0 2 0.87 0.13  
1 0 2 550.08 11.68  
1 0 2 549.13 11.08  
-1 0 -2 559.47 10.84  
-1 0 -2 545.07 11.68  
1 0 2 549.66 10.91  
1 0 2 539.88 10.18  
-2 0 -2 80.02 1.91  
-2 0 -2 79.58 1.68  
2 0 2 80.03 1.76  
2 0 2 79.30 1.73  
2 0 2 79.39 1.51  
2 0 2 78.17 1.90  
3 0 2 25.68 0.55  
-3 0 -2 25.48 0.85  
3 0 2 26.90 0.75  
3 0 2 27.06 0.73  
3 0 2 25.72 0.83  
4 0 2 -0.38 0.19

4 0 2 0.32 0.25  
-4 0 -2 -0.13 0.16  
4 0 2 0.05 0.08  
-4 0 -2 0.11 0.16  
4 0 2 -0.11 0.20  
-4 0 -2 -0.07 0.23  
5 0 2 0.73 0.26  
5 0 2 0.34 0.29  
5 0 2 0.15 0.25  
5 0 2 0.30 0.11  
-5 0 -2 0.31 0.21  
-5 0 -2 0.17 0.28  
-5 0 -2 0.34 0.22  
6 0 2 14.00 0.67  
6 0 2 14.10 0.39  
6 0 2 14.85 0.71  
-6 0 -2 14.54 0.62  
-6 0 -2 14.26 0.61  
-6 0 -2 15.72 0.83  
6 0 2 14.09 0.75  
-7 0 -2 13.92 0.66  
-7 0 -2 13.60 0.64  
7 0 2 14.19 0.76  
-8 0 -2 9.72 0.60  
8 0 2 7.75 0.63  
-8 0 -2 9.07 0.58  
9 0 2 0.45 0.39  
-9 0 -2 -0.28 0.26  
-9 0 -2 -0.36 0.29  
-10 0 -2 0.06 0.33  
10 0 2 0.28 0.40  
-10 0 -2 -0.19 0.36  
11 0 2 0.26 0.46  
-11 0 -2 -0.37 0.37  
12 0 2 0.52 0.49  
-12 0 -2 -0.41 0.41  
-13 0 -2 0.23 0.46  
-14 -1 2 0.54 0.48  
14 1 -2 0.68 0.54  
13 -1 -2 0.49 0.50  
-13 -1 2 0.57 0.40  
13 1 -2 -0.25 0.47  
-13 1 2 0.37 0.47  
12 -1 -2 -0.14 0.43  
-12 -1 2 -0.45 0.37  
12 1 -2 0.38 0.44



-12 1 2 -0.06 0.35  
11 -1 -2 0.02 0.39  
-11 -1 2 0.24 0.33  
11 1 -2 0.30 0.40  
-11 1 2 0.09 0.35  
-10 -1 2 1.39 0.37  
10 -1 -2 1.64 0.45  
10 1 -2 1.94 0.46  
-10 1 2 0.78 0.38  
-9 -1 2 0.29 0.29  
9 -1 -2 0.73 0.24  
9 -1 -2 0.20 0.37  
-9 1 2 0.80 0.35  
9 1 -2 0.05 0.34  
9 1 -2 0.74 0.27  
8 -1 -2 5.61 0.36  
8 -1 -2 4.25 0.50  
-8 -1 2 4.93 0.37  
-8 -1 2 3.71 0.42  
-8 -1 2 4.16 0.52  
8 1 -2 4.74 0.37  
8 1 -2 4.26 0.47  
-8 1 2 3.52 0.41  
-8 1 2 4.84 0.33  
7 -1 -2 2.65 0.40  
-7 -1 2 3.24 0.46  
-7 -1 2 2.28 0.26  
7 -1 -2 1.63 0.37  
7 -1 -2 1.94 0.25  
-7 -1 2 1.91 0.35  
-7 1 2 2.15 0.44  
7 1 -2 2.06 0.38  
7 1 -2 1.79 0.39  
-7 1 2 2.12 0.23  
7 1 -2 1.88 0.36  
-7 1 2 2.92 0.35  
-6 -1 2 40.81 1.01  
6 -1 -2 42.18 1.18  
-6 -1 2 43.25 1.14  
6 -1 -2 41.30 0.96  
6 -1 -2 42.51 1.31  
-6 -1 2 43.53 1.30  
-6 1 2 42.38 1.33  
-6 1 2 42.29 0.98  
6 1 -2 41.35 1.13  
-6 1 2 41.54 0.97

|    |    |    |        |      |
|----|----|----|--------|------|
| -6 | 1  | 2  | 40.62  | 1.12 |
| 6  | 1  | -2 | 44.92  | 1.28 |
| -5 | -1 | 2  | 37.97  | 0.99 |
| 5  | -1 | -2 | 37.37  | 1.13 |
| -5 | -1 | 2  | 36.88  | 0.87 |
| -5 | -1 | 2  | 35.05  | 1.09 |
| 5  | -1 | -2 | 36.76  | 1.01 |
| 5  | -1 | -2 | 36.32  | 0.82 |
| 5  | 1  | -2 | 36.84  | 1.09 |
| -5 | 1  | 2  | 37.98  | 0.84 |
| 5  | 1  | -2 | 37.66  | 0.97 |
| -5 | 1  | 2  | 35.39  | 1.15 |
| -5 | 1  | 2  | 37.40  | 0.98 |
| 5  | 1  | -2 | 38.26  | 0.88 |
| -5 | 1  | 2  | 36.75  | 0.84 |
| -4 | -1 | 2  | 5.64   | 0.32 |
| -4 | -1 | 2  | 5.34   | 0.40 |
| -4 | -1 | 2  | 5.77   | 0.26 |
| 4  | -1 | -2 | 5.34   | 0.37 |
| 4  | -1 | -2 | 5.20   | 0.41 |
| 4  | -1 | -2 | 5.76   | 0.20 |
| -4 | 1  | 2  | 5.18   | 0.30 |
| 4  | 1  | -2 | 5.72   | 0.38 |
| -4 | 1  | 2  | 5.85   | 0.45 |
| 4  | 1  | -2 | 5.62   | 0.32 |
| -4 | 1  | 2  | 5.78   | 0.25 |
| 4  | 1  | -2 | 5.30   | 0.29 |
| -3 | -1 | 2  | 17.86  | 0.60 |
| 3  | -1 | -2 | 17.07  | 0.57 |
| 3  | -1 | -2 | 18.16  | 0.65 |
| 3  | -1 | -2 | 17.23  | 0.39 |
| -3 | -1 | 2  | 17.03  | 0.52 |
| -3 | -1 | 2  | 17.70  | 0.45 |
| -3 | 1  | 2  | 17.09  | 0.46 |
| 3  | 1  | -2 | 17.27  | 0.51 |
| 3  | 1  | -2 | 16.88  | 0.47 |
| -3 | 1  | 2  | 18.51  | 0.66 |
| -3 | 1  | 2  | 17.06  | 0.51 |
| 3  | 1  | -2 | 17.65  | 0.58 |
| 2  | -1 | -2 | 425.63 | 8.49 |
| -2 | -1 | 2  | 429.64 | 9.13 |
| 2  | -1 | -2 | 433.98 | 9.20 |
| -2 | -1 | 2  | 423.27 | 8.53 |
| 2  | -1 | -2 | 433.91 | 8.64 |
| -2 | -1 | 2  | 421.46 | 8.43 |
| 2  | 1  | -2 | 414.71 | 8.57 |

-2 1 2 436.65 9.20  
2 1 -2 434.26 7.99  
-2 1 2 431.97 8.41  
2 1 -2 426.56 9.12  
-2 1 2 430.07 7.97  
1 -1 -2 26.53 0.57  
-1 -1 2 25.70 0.55  
1 -1 -2 24.81 0.63  
-1 -1 2 24.57 0.63  
1 -1 -2 25.98 0.71  
-1 -1 2 25.20 0.60  
-1 1 2 25.58 0.70  
-1 1 2 25.81 0.56  
1 1 -2 24.72 0.63  
-1 1 2 26.35 0.56  
0 -1 -2 259.50 5.05  
0 -1 2 259.84 4.68  
0 -1 -2 253.44 5.43  
0 -1 2 250.28 4.98  
0 -1 2 252.81 5.05  
0 1 2 249.14 5.09  
0 1 2 259.03 4.91  
0 1 2 246.17 4.70  
0 1 -2 234.27 5.37  
-1 -1 -2 40.69 0.93  
1 -1 2 40.26 0.93  
-1 -1 -2 40.60 1.04  
1 -1 2 40.96 1.02  
1 -1 2 40.33 0.93  
1 -1 2 40.76 0.78  
-1 -1 -2 42.60 0.85  
1 1 2 40.03 1.04  
-1 1 -2 35.15 0.91  
1 1 2 40.53 0.95  
-1 1 -2 40.81 1.02  
-2 -1 -2 1.49 0.24  
2 -1 2 1.23 0.23  
-2 -1 -2 2.00 0.17  
2 -1 2 1.65 0.21  
-2 -1 -2 2.19 0.21  
2 -1 2 1.59 0.21  
-2 1 -2 1.39 0.23  
2 1 2 2.15 0.26  
2 1 2 1.80 0.26  
2 1 2 1.74 0.24  
-2 1 -2 1.85 0.20

2 1 2 1.98 0.16  
-3 -1 -2 300.19 6.56  
3 -1 2 302.36 6.06  
-3 -1 -2 291.40 6.07  
3 -1 2 299.94 6.55  
3 -1 2 296.98 6.11  
-3 -1 -2 295.35 5.93  
3 1 2 300.08 6.56  
-3 1 -2 298.01 5.98  
3 1 2 294.59 5.57  
-3 1 -2 296.02 6.55  
3 1 2 301.11 6.12  
4 -1 2 50.85 1.45  
4 -1 2 52.26 1.27  
4 -1 2 50.65 1.30  
-4 -1 -2 52.94 1.23  
-4 -1 -2 51.30 1.47  
-4 -1 -2 54.00 1.29  
-4 1 -2 51.65 1.47  
-4 1 -2 51.50 1.27  
4 1 2 52.13 1.08  
4 1 2 53.90 1.33  
4 1 2 51.86 1.46  
5 -1 2 7.07 0.44  
5 -1 2 5.48 0.47  
-5 -1 -2 6.32 0.42  
5 -1 2 5.84 0.17  
5 -1 2 5.93 0.44  
-5 -1 -2 6.11 0.36  
-5 -1 -2 6.57 0.55  
-5 1 -2 7.12 0.55  
5 1 2 6.72 0.50  
5 1 2 6.02 0.51  
5 1 2 6.34 0.28  
-5 1 -2 5.97 0.40  
-6 -1 -2 10.54 0.74  
6 -1 2 9.39 0.70  
-6 -1 -2 10.50 0.56  
6 -1 2 10.75 0.64  
-6 -1 -2 10.36 0.53  
6 1 2 10.74 0.64  
-6 1 -2 9.85 0.53  
6 1 2 10.86 0.38  
-6 1 -2 9.05 0.72  
6 1 2 11.48 0.73  
7 -1 2 4.62 0.49

-7 -1 -2 5.86 0.49  
7 -1 2 5.46 0.53  
-7 -1 -2 5.17 0.45  
-7 1 -2 5.27 0.48  
-7 1 -2 4.78 0.43  
7 1 2 5.38 0.54  
-8 -1 -2 2.64 0.39  
8 -1 2 2.17 0.42  
-8 -1 -2 2.04 0.37  
8 -1 2 1.97 0.43  
-8 1 -2 1.93 0.35  
8 1 2 1.61 0.42  
-8 1 -2 2.88 0.42  
-9 -1 -2 0.69 0.29  
9 -1 2 0.56 0.41  
-9 -1 -2 0.86 0.35  
9 1 2 1.42 0.40  
-9 1 -2 0.84 0.33  
-9 1 -2 0.03 0.29  
-10 -1 -2 0.28 0.36  
-10 -1 -2 0.56 0.35  
10 -1 2 1.27 0.47  
-10 1 -2 0.62 0.34  
10 1 2 1.36 0.45  
-11 -1 -2 0.35 0.40  
11 -1 2 0.22 0.47  
-11 1 -2 -0.20 0.38  
11 1 2 0.11 0.43  
-12 -1 -2 0.23 0.43  
12 -1 2 0.67 0.52  
-12 1 -2 0.17 0.43  
12 1 2 0.14 0.50  
-13 -1 -2 -0.73 0.42  
-13 1 -2 0.59 0.56  
-14 -2 2 -0.54 0.48  
14 2 -2 0.56 0.50  
-13 -2 2 -0.03 0.42  
13 -2 -2 0.68 0.53  
-13 2 2 -0.12 0.38  
13 2 -2 0.34 0.49  
12 -2 -2 0.16 0.40  
-12 -2 2 0.00 0.34  
12 2 -2 0.28 0.44  
-12 2 2 -0.18 0.36  
11 -2 -2 0.83 0.45  
-11 -2 2 0.56 0.38

|     |    |    |       |      |
|-----|----|----|-------|------|
| -11 | 2  | 2  | 0.40  | 0.37 |
| 11  | 2  | -2 | 0.04  | 0.38 |
| 10  | -2 | -2 | 0.61  | 0.40 |
| -10 | -2 | 2  | 1.05  | 0.34 |
| 10  | 2  | -2 | 0.05  | 0.37 |
| -10 | 2  | 2  | 0.60  | 0.36 |
| 10  | 2  | -2 | 0.19  | 0.31 |
| -9  | -2 | 2  | 2.43  | 0.41 |
| 9   | -2 | -2 | 1.69  | 0.42 |
| -9  | -2 | 2  | 1.56  | 0.37 |
| 9   | 2  | -2 | 1.38  | 0.40 |
| -9  | 2  | 2  | 1.87  | 0.36 |
| 9   | 2  | -2 | 2.80  | 0.35 |
| 8   | -2 | -2 | 0.06  | 0.38 |
| 8   | -2 | -2 | 0.70  | 0.24 |
| -8  | -2 | 2  | 0.00  | 0.37 |
| -8  | -2 | 2  | -0.03 | 0.28 |
| 8   | -2 | -2 | 0.60  | 0.21 |
| -8  | -2 | 2  | 0.21  | 0.25 |
| -8  | 2  | 2  | -0.08 | 0.30 |
| 8   | 2  | -2 | 0.56  | 0.35 |
| -8  | 2  | 2  | 0.70  | 0.21 |
| -7  | -2 | 2  | 17.94 | 0.83 |
| -7  | -2 | 2  | 17.42 | 0.69 |
| -7  | -2 | 2  | 15.90 | 0.60 |
| 7   | -2 | -2 | 17.61 | 0.88 |
| 7   | -2 | -2 | 18.19 | 0.79 |
| -7  | 2  | 2  | 19.61 | 0.94 |
| -7  | 2  | 2  | 17.67 | 0.72 |
| 7   | 2  | -2 | 17.07 | 0.71 |
| -7  | 2  | 2  | 17.38 | 0.54 |
| 7   | 2  | -2 | 16.84 | 0.79 |
| -6  | -2 | 2  | 14.88 | 0.53 |
| -6  | -2 | 2  | 14.66 | 0.61 |
| 6   | -2 | -2 | 13.95 | 0.45 |
| -6  | -2 | 2  | 14.94 | 0.68 |
| 6   | -2 | -2 | 14.14 | 0.65 |
| -6  | 2  | 2  | 14.08 | 0.59 |
| 6   | 2  | -2 | 14.06 | 0.53 |
| -6  | 2  | 2  | 13.06 | 0.75 |
| 6   | 2  | -2 | 14.70 | 0.59 |
| -6  | 2  | 2  | 14.61 | 0.46 |
| 6   | 2  | -2 | 13.97 | 0.67 |
| 5   | -2 | -2 | 51.86 | 1.44 |
| -5  | -2 | 2  | 49.95 | 1.35 |
| 5   | -2 | -2 | 50.13 | 1.10 |

|    |    |    |        |      |
|----|----|----|--------|------|
| 5  | -2 | -2 | 50.97  | 1.29 |
| -5 | -2 | 2  | 48.83  | 1.24 |
| -5 | -2 | 2  | 47.95  | 1.17 |
| 5  | 2  | -2 | 50.92  | 1.15 |
| 5  | 2  | -2 | 48.75  | 1.21 |
| -5 | 2  | 2  | 50.22  | 1.46 |
| -5 | 2  | 2  | 50.64  | 1.23 |
| -5 | 2  | 2  | 51.13  | 1.10 |
| 5  | 2  | -2 | 49.44  | 1.34 |
| 4  | -2 | -2 | 169.03 | 3.56 |
| 4  | -2 | -2 | 169.37 | 3.84 |
| -4 | -2 | 2  | 167.24 | 3.74 |
| 4  | -2 | -2 | 167.84 | 3.38 |
| -4 | -2 | 2  | 168.23 | 3.45 |
| -4 | -2 | 2  | 161.19 | 3.46 |
| -4 | 2  | 2  | 170.68 | 3.87 |
| 4  | 2  | -2 | 168.87 | 3.74 |
| -4 | 2  | 2  | 167.26 | 3.23 |
| 4  | 2  | -2 | 164.25 | 3.47 |
| -4 | 2  | 2  | 164.01 | 3.45 |
| 4  | 2  | -2 | 170.56 | 3.27 |
| 3  | -2 | -2 | 124.61 | 2.73 |
| -3 | -2 | 2  | 124.89 | 2.64 |
| -3 | -2 | 2  | 127.11 | 2.83 |
| -3 | -2 | 2  | 127.73 | 2.65 |
| 3  | -2 | -2 | 129.71 | 2.58 |
| 3  | -2 | -2 | 126.46 | 2.96 |
| 3  | 2  | -2 | 127.21 | 2.82 |
| -3 | 2  | 2  | 125.80 | 2.47 |
| -3 | 2  | 2  | 129.10 | 2.97 |
| 3  | 2  | -2 | 128.35 | 2.50 |
| 3  | 2  | -2 | 125.83 | 2.63 |
| -3 | 2  | 2  | 127.72 | 2.62 |
| -2 | -2 | 2  | 90.22  | 1.97 |
| -2 | -2 | 2  | 95.97  | 2.08 |
| 2  | -2 | -2 | 95.31  | 1.94 |
| 2  | -2 | -2 | 92.72  | 2.05 |
| 2  | -2 | -2 | 95.28  | 2.22 |
| -2 | 2  | 2  | 94.60  | 2.22 |
| -2 | 2  | 2  | 93.57  | 1.85 |
| 2  | 2  | -2 | 93.01  | 1.92 |
| 2  | 2  | -2 | 92.36  | 1.86 |
| 2  | 2  | -2 | 96.10  | 2.06 |
| -1 | -2 | 2  | 482.07 | 9.50 |
| -1 | -2 | 2  | 464.50 | 9.37 |
| 1  | -2 | -2 | 475.78 | 9.59 |

|    |    |    |        |       |
|----|----|----|--------|-------|
| 1  | -2 | -2 | 491.89 | 9.63  |
| 1  | -2 | -2 | 479.14 | 10.21 |
| -1 | 2  | 2  | 498.06 | 9.43  |
| -1 | 2  | 2  | 477.20 | 10.21 |
| 1  | 2  | -2 | 474.01 | 9.54  |
| 1  | 2  | -2 | 468.51 | 10.12 |
| 1  | 2  | -2 | 465.53 | 8.94  |
| -1 | 2  | 2  | 489.12 | 8.88  |
| 1  | 2  | -2 | 458.61 | 10.14 |
| 0  | -2 | 2  | 12.13  | 0.33  |
| 0  | -2 | 2  | 12.57  | 0.37  |
| 0  | -2 | 2  | 11.63  | 0.39  |
| 0  | -2 | -2 | 12.22  | 0.39  |
| 0  | -2 | -2 | 12.22  | 0.47  |
| 0  | -2 | -2 | 12.26  | 0.47  |
| 0  | -2 | 2  | 11.66  | 0.39  |
| 0  | 2  | -2 | 12.59  | 0.37  |
| 0  | 2  | 2  | 12.26  | 0.36  |
| 0  | 2  | -2 | 11.83  | 0.32  |
| 0  | 2  | 2  | 12.20  | 0.41  |
| -1 | -2 | -2 | 182.65 | 3.95  |
| 1  | -2 | 2  | 178.84 | 3.66  |
| -1 | -2 | -2 | 181.66 | 3.49  |
| -1 | -2 | -2 | 177.64 | 3.66  |
| -1 | 2  | -2 | 161.26 | 3.61  |
| -1 | 2  | -2 | 180.78 | 3.90  |
| 1  | 2  | 2  | 180.14 | 3.95  |
| 1  | 2  | 2  | 177.00 | 3.68  |
| -1 | 2  | -2 | 180.45 | 3.33  |
| 1  | 2  | 2  | 180.88 | 3.40  |
| -2 | -2 | -2 | 332.27 | 7.20  |
| 2  | -2 | 2  | 334.82 | 6.72  |
| 2  | -2 | 2  | 328.31 | 7.17  |
| 2  | -2 | 2  | 328.67 | 6.69  |
| -2 | -2 | -2 | 334.13 | 6.51  |
| -2 | -2 | -2 | 332.24 | 6.71  |
| -2 | 2  | -2 | 315.58 | 6.11  |
| -2 | 2  | -2 | 329.93 | 6.62  |
| -2 | 2  | -2 | 330.64 | 7.17  |
| 2  | 2  | 2  | 337.83 | 6.75  |
| 2  | 2  | 2  | 339.14 | 7.21  |
| 3  | -2 | 2  | 48.93  | 1.31  |
| 3  | -2 | 2  | 48.81  | 1.19  |
| -3 | -2 | -2 | 49.60  | 1.09  |
| 3  | -2 | 2  | 50.55  | 1.18  |
| -3 | -2 | -2 | 47.91  | 1.17  |



-3 -2 -2 48.93 1.34  
-3 2 -2 48.06 1.31  
3 2 2 47.40 1.20  
3 2 2 48.32 1.32  
3 2 2 48.77 1.04  
-3 2 -2 42.08 1.15  
4 -2 2 5.89 0.39  
-4 -2 -2 6.93 0.34  
4 -2 2 6.60 0.48  
-4 -2 -2 6.65 0.39  
4 -2 2 6.57 0.37  
-4 -2 -2 6.57 0.50  
-4 2 -2 6.14 0.40  
-4 2 -2 6.46 0.49  
4 2 2 6.29 0.48  
4 2 2 6.82 0.29  
4 2 2 7.21 0.44  
5 -2 2 7.18 0.51  
5 -2 2 6.41 0.54  
-5 -2 -2 6.89 0.45  
-5 -2 -2 6.68 0.54  
-5 -2 -2 6.49 0.39  
5 -2 2 7.00 0.42  
-5 2 -2 6.45 0.54  
-5 2 -2 6.81 0.48  
5 2 2 7.13 0.34  
5 2 2 5.80 0.50  
5 2 2 7.03 0.46  
6 -2 2 4.55 0.59  
6 -2 2 3.05 0.42  
-6 -2 -2 5.26 0.44  
-6 -2 -2 3.92 0.37  
-6 -2 -2 4.65 0.55  
6 -2 2 4.52 0.42  
6 2 2 4.04 0.29  
-6 2 -2 4.35 0.42  
6 2 2 3.82 0.48  
6 2 2 3.73 0.42  
-6 2 -2 4.23 0.52  
7 -2 2 18.67 0.85  
7 -2 2 20.87 0.78  
-7 -2 -2 18.55 0.73  
-7 -2 -2 20.30 0.79  
7 2 2 20.34 0.61  
7 2 2 19.42 0.85  
-7 2 -2 18.14 0.81

-8 -2 -2 1.54 0.34  
8 -2 2 1.18 0.37  
-8 -2 -2 1.22 0.35  
8 -2 2 0.79 0.35  
8 2 2 0.61 0.38  
-8 2 -2 0.86 0.31  
-8 2 -2 1.14 0.32  
-9 -2 -2 0.48 0.31  
-9 -2 -2 0.06 0.32  
9 -2 2 0.94 0.42  
9 -2 2 0.74 0.40  
-9 2 -2 0.42 0.31  
-9 2 -2 0.95 0.34  
9 2 2 0.64 0.35  
-10 -2 -2 0.29 0.38  
10 -2 2 0.39 0.43  
-10 -2 -2 0.43 0.34  
-10 2 -2 0.00 0.36  
10 2 2 0.62 0.41  
11 -2 2 0.77 0.49  
-11 -2 -2 0.71 0.39  
11 2 2 1.29 0.49  
-11 2 -2 1.38 0.47  
-12 -2 -2 0.43 0.45  
12 -2 2 0.67 0.48  
12 2 2 -0.27 0.45  
-12 2 -2 0.98 0.49  
-14 -3 2 0.24 0.49  
14 3 -2 0.41 0.51  
-13 -3 2 0.24 0.46  
13 -3 -2 0.31 0.50  
13 3 -2 0.20 0.47  
-13 3 2 0.58 0.48  
-12 -3 2 -0.10 0.35  
12 -3 -2 0.59 0.45  
-12 3 2 0.36 0.39  
12 3 -2 0.37 0.44  
11 -3 -2 0.62 0.38  
-11 -3 2 0.32 0.38  
-11 3 2 1.01 0.39  
11 3 -2 1.88 0.45  
-10 -3 2 0.65 0.37  
10 -3 -2 0.78 0.42  
10 3 -2 0.98 0.32  
-10 3 2 0.89 0.38  
10 3 -2 0.95 0.38

-9 -3 2 0.47 0.31  
9 -3 -2 0.61 0.35  
-9 -3 2 0.40 0.31  
9 3 -2 0.73 0.36  
-9 3 2 0.66 0.34  
-8 -3 2 4.17 0.42  
8 -3 -2 4.17 0.33  
-8 -3 2 4.08 0.54  
8 -3 -2 4.96 0.54  
-8 -3 2 4.46 0.48  
8 3 -2 3.66 0.55  
8 3 -2 4.11 0.41  
-8 3 2 3.87 0.45  
8 3 -2 3.60 0.45  
-8 3 2 4.59 0.32  
7 -3 -2 5.68 0.34  
7 -3 -2 5.39 0.52  
-7 -3 2 6.02 0.54  
-7 -3 2 5.65 0.42  
-7 -3 2 6.06 0.50  
7 3 -2 5.61 0.47  
-7 3 2 5.04 0.43  
-7 3 2 5.38 0.56  
7 3 -2 5.99 0.40  
-7 3 2 6.06 0.33  
7 3 -2 5.63 0.50  
-6 -3 2 12.96 0.59  
6 -3 -2 13.12 0.74  
6 -3 -2 11.96 0.43  
-6 -3 2 13.13 0.54  
6 -3 -2 12.33 0.65  
-6 -3 2 12.17 0.63  
6 3 -2 13.57 0.58  
-6 3 2 12.56 0.43  
-6 3 2 11.87 0.54  
-6 3 2 11.86 0.71  
6 3 -2 12.74 0.50  
6 3 -2 12.32 0.63  
5 -3 -2 33.48 0.97  
-5 -3 2 32.12 0.89  
-5 -3 2 31.04 0.89  
-5 -3 2 31.48 0.96  
5 -3 -2 32.49 0.79  
5 -3 -2 33.02 1.09  
5 3 -2 31.28 0.83  
-5 3 2 32.00 0.78

|    |    |    |        |      |
|----|----|----|--------|------|
| 5  | 3  | -2 | 32.61  | 0.97 |
| 5  | 3  | -2 | 32.04  | 0.86 |
| -5 | 3  | 2  | 32.40  | 0.90 |
| -5 | 3  | 2  | 33.40  | 1.12 |
| 4  | -3 | -2 | 189.87 | 3.82 |
| -4 | -3 | 2  | 191.36 | 3.88 |
| 4  | -3 | -2 | 192.57 | 4.30 |
| -4 | -3 | 2  | 182.68 | 4.09 |
| 4  | -3 | -2 | 190.93 | 3.99 |
| -4 | -3 | 2  | 183.58 | 4.14 |
| 4  | 3  | -2 | 183.81 | 3.86 |
| -4 | 3  | 2  | 188.16 | 3.62 |
| 4  | 3  | -2 | 185.80 | 4.14 |
| -4 | 3  | 2  | 187.61 | 4.32 |
| -4 | 3  | 2  | 184.14 | 3.85 |
| 4  | 3  | -2 | 188.93 | 3.66 |
| 3  | -3 | -2 | 88.83  | 1.84 |
| 3  | -3 | -2 | 86.91  | 1.96 |
| -3 | -3 | 2  | 85.10  | 1.88 |
| 3  | -3 | -2 | 86.47  | 2.15 |
| -3 | -3 | 2  | 85.28  | 1.96 |
| 3  | 3  | -2 | 87.71  | 1.79 |
| 3  | 3  | -2 | 84.67  | 1.82 |
| -3 | 3  | 2  | 86.88  | 1.76 |
| -3 | 3  | 2  | 88.45  | 2.16 |
| -3 | 3  | 2  | 89.44  | 1.86 |
| 3  | 3  | -2 | 86.55  | 1.96 |
| -2 | -3 | 2  | 61.44  | 1.41 |
| 2  | -3 | -2 | 60.45  | 1.37 |
| -2 | -3 | 2  | 63.02  | 1.38 |
| 2  | -3 | -2 | 59.77  | 1.58 |
| 2  | -3 | -2 | 62.62  | 1.45 |
| -2 | -3 | 2  | 62.21  | 1.39 |
| 2  | 3  | -2 | 62.33  | 1.36 |
| -2 | 3  | 2  | 62.40  | 1.58 |
| -2 | 3  | 2  | 62.07  | 1.30 |
| 2  | 3  | -2 | 60.92  | 1.27 |
| 1  | -3 | -2 | 66.39  | 1.64 |
| 1  | -3 | -2 | 66.59  | 1.48 |
| -1 | -3 | 2  | 66.82  | 1.49 |
| -1 | -3 | 2  | 64.96  | 1.46 |
| 1  | -3 | -2 | 64.42  | 1.50 |
| -1 | 3  | 2  | 66.37  | 1.38 |
| -1 | 3  | 2  | 68.19  | 1.36 |
| -1 | 3  | 2  | 66.79  | 1.64 |
| 0  | -3 | 2  | 238.15 | 4.88 |

|    |    |    |        |      |
|----|----|----|--------|------|
| 0  | -3 | 2  | 239.59 | 5.18 |
| 0  | -3 | -2 | 246.44 | 5.33 |
| 0  | -3 | 2  | 243.06 | 4.87 |
| 0  | -3 | 2  | 242.12 | 4.94 |
| 0  | -3 | -2 | 243.25 | 4.95 |
| 0  | 3  | 2  | 240.54 | 4.73 |
| 0  | 3  | 2  | 252.76 | 4.63 |
| 0  | 3  | -2 | 238.40 | 4.57 |
| 0  | 3  | -2 | 245.16 | 5.17 |
| 0  | 3  | 2  | 239.67 | 4.95 |
| -1 | -3 | -2 | 101.04 | 1.94 |
| 1  | -3 | 2  | 95.96  | 2.05 |
| -1 | -3 | -2 | 97.17  | 2.28 |
| -1 | -3 | -2 | 99.32  | 2.12 |
| 1  | -3 | 2  | 96.26  | 2.21 |
| 1  | -3 | 2  | 96.10  | 2.10 |
| -1 | 3  | -2 | 96.45  | 2.21 |
| -1 | 3  | -2 | 94.92  | 1.89 |
| 1  | 3  | 2  | 98.98  | 2.28 |
| -1 | 3  | -2 | 98.96  | 2.10 |
| 1  | 3  | 2  | 97.75  | 1.96 |
| 1  | 3  | 2  | 97.19  | 2.10 |
| -2 | -3 | -2 | 28.41  | 0.65 |
| -2 | -3 | -2 | 27.69  | 0.87 |
| -2 | -3 | -2 | 28.49  | 0.79 |
| 2  | -3 | 2  | 28.16  | 0.78 |
| 2  | 3  | 2  | 30.56  | 0.72 |
| 2  | 3  | 2  | 28.99  | 0.88 |
| 2  | 3  | 2  | 29.60  | 0.79 |
| -2 | 3  | -2 | 29.37  | 0.79 |
| -2 | 3  | -2 | 28.17  | 0.61 |
| -2 | 3  | -2 | 28.53  | 0.84 |
| -3 | -3 | -2 | 23.56  | 0.59 |
| 3  | -3 | 2  | 23.93  | 0.70 |
| -3 | -3 | -2 | 24.05  | 0.82 |
| 3  | -3 | 2  | 24.08  | 0.78 |
| -3 | -3 | -2 | 22.33  | 0.70 |
| 3  | -3 | 2  | 22.22  | 0.69 |
| -3 | 3  | -2 | 23.27  | 0.78 |
| 3  | 3  | 2  | 23.48  | 0.72 |
| -3 | 3  | -2 | 22.62  | 0.47 |
| -3 | 3  | -2 | 21.08  | 0.69 |
| 3  | 3  | 2  | 23.93  | 0.81 |
| -4 | -3 | -2 | 7.66   | 0.54 |
| -4 | -3 | -2 | 7.81   | 0.34 |
| 4  | -3 | 2  | 8.32   | 0.45 |

|    |    |    |       |      |
|----|----|----|-------|------|
| 4  | -3 | 2  | 7.67  | 0.51 |
| -4 | -3 | -2 | 8.27  | 0.43 |
| 4  | -3 | 2  | 7.64  | 0.46 |
| -4 | 3  | -2 | 7.21  | 0.43 |
| 4  | 3  | 2  | 7.08  | 0.46 |
| 4  | 3  | 2  | 8.31  | 0.36 |
| -4 | 3  | -2 | 7.97  | 0.53 |
| 4  | 3  | 2  | 7.93  | 0.52 |
| -5 | -3 | -2 | 25.76 | 0.76 |
| 5  | -3 | 2  | 26.52 | 0.89 |
| 5  | -3 | 2  | 26.03 | 0.84 |
| 5  | -3 | 2  | 24.08 | 0.97 |
| -5 | -3 | -2 | 26.52 | 1.01 |
| -5 | -3 | -2 | 24.80 | 0.83 |
| 5  | 3  | 2  | 26.33 | 0.99 |
| -5 | 3  | -2 | 26.34 | 1.00 |
| 5  | 3  | 2  | 27.07 | 0.73 |
| -5 | 3  | -2 | 27.44 | 0.89 |
| 5  | 3  | 2  | 25.64 | 0.89 |
| -6 | -3 | -2 | 10.02 | 0.54 |
| -6 | -3 | -2 | 9.64  | 0.49 |
| -6 | -3 | -2 | 8.92  | 0.71 |
| 6  | -3 | 2  | 8.29  | 0.50 |
| 6  | -3 | 2  | 9.65  | 0.59 |
| -6 | 3  | -2 | 10.40 | 0.58 |
| 6  | 3  | 2  | 9.74  | 0.62 |
| 6  | 3  | 2  | 10.59 | 0.46 |
| -6 | 3  | -2 | 10.25 | 0.74 |
| 6  | 3  | 2  | 10.08 | 0.71 |
| 7  | -3 | 2  | 1.74  | 0.35 |
| -7 | -3 | -2 | 1.78  | 0.32 |
| -7 | -3 | -2 | 2.15  | 0.39 |
| 7  | -3 | 2  | 1.51  | 0.41 |
| 7  | 3  | 2  | 1.65  | 0.39 |
| -7 | 3  | -2 | 1.68  | 0.39 |
| 7  | 3  | 2  | 1.98  | 0.27 |
| -8 | -3 | -2 | 2.89  | 0.40 |
| 8  | -3 | 2  | 2.72  | 0.42 |
| 8  | -3 | 2  | 2.01  | 0.44 |
| -8 | -3 | -2 | 3.16  | 0.44 |
| -8 | 3  | -2 | 3.28  | 0.46 |
| 8  | 3  | 2  | 3.39  | 0.47 |
| -9 | -3 | -2 | 0.34  | 0.30 |
| 9  | -3 | 2  | 0.48  | 0.36 |
| 9  | -3 | 2  | 0.04  | 0.38 |
| -9 | -3 | -2 | 0.01  | 0.34 |

-9 3 -2 0.22 0.31  
-9 3 -2 -0.27 0.28  
9 3 2 0.58 0.37  
-10 -3 -2 1.33 0.46  
-10 -3 -2 0.94 0.38  
10 -3 2 1.50 0.45  
10 -3 2 1.79 0.50  
10 3 2 1.14 0.46  
-10 3 -2 1.95 0.46  
11 -3 2 1.00 0.51  
-11 -3 -2 0.65 0.40  
11 3 2 1.33 0.51  
-11 3 -2 0.16 0.37  
12 -3 2 0.70 0.53  
12 3 2 0.53 0.51  
-12 3 -2 0.14 0.47  
-14 -4 2 0.15 0.54  
14 4 -2 0.74 0.55  
13 -4 -2 0.41 0.52  
-13 -4 2 0.25 0.47  
13 4 -2 -0.06 0.48  
-13 4 2 -0.03 0.40  
12 -4 -2 0.22 0.48  
-12 -4 2 -0.28 0.41  
12 4 -2 0.15 0.44  
-12 4 2 -0.25 0.42  
-11 -4 2 0.78 0.35  
11 -4 -2 0.34 0.43  
-11 4 2 0.50 0.36  
11 4 -2 0.92 0.41  
10 -4 -2 0.18 0.36  
-10 -4 2 0.12 0.35  
-10 4 2 0.51 0.36  
10 4 -2 0.62 0.37  
-9 -4 2 -0.13 0.32  
9 -4 -2 0.20 0.35  
-9 -4 2 -0.10 0.32  
9 4 -2 0.13 0.32  
9 4 -2 0.31 0.29  
-9 4 2 -0.31 0.27  
-8 -4 2 0.74 0.34  
-8 -4 2 1.82 0.38  
-8 -4 2 0.43 0.36  
8 -4 -2 1.07 0.25  
8 -4 -2 1.25 0.44  
8 4 -2 1.07 0.34

-8 4 2 1.42 0.32  
8 4 -2 1.11 0.36  
-8 4 2 1.29 0.23  
8 4 -2 1.12 0.31  
-7 -4 2 13.13 0.66  
7 -4 -2 12.40 0.50  
7 -4 -2 12.40 0.68  
-7 -4 2 14.04 0.67  
-7 -4 2 12.99 0.73  
-7 4 2 13.06 0.48  
7 4 -2 11.74 0.68  
7 4 -2 12.61 0.60  
-7 4 2 11.42 0.60  
7 4 -2 12.88 0.59  
6 -4 -2 0.15 0.32  
-6 -4 2 -0.07 0.27  
6 -4 -2 0.24 0.20  
6 -4 -2 0.55 0.32  
-6 -4 2 0.37 0.27  
-6 -4 2 -0.33 0.28  
6 4 -2 -0.08 0.25  
-6 4 2 -0.03 0.23  
-6 4 2 0.18 0.34  
6 4 -2 -0.27 0.23  
-6 4 2 0.31 0.17  
6 4 -2 0.16 0.24  
5 -4 -2 28.08 1.03  
5 -4 -2 28.54 0.91  
-5 -4 2 25.49 0.82  
5 -4 -2 28.44 0.75  
-5 -4 2 28.19 0.88  
-5 4 2 28.69 1.06  
-5 4 2 28.43 0.85  
5 4 -2 28.17 0.77  
5 4 -2 28.08 0.79  
-5 4 2 28.18 0.73  
5 4 -2 28.22 0.87  
4 -4 -2 40.00 0.97  
-4 -4 2 37.83 1.07  
-4 -4 2 39.31 1.03  
4 -4 -2 40.00 1.22  
4 -4 -2 41.77 1.10  
-4 -4 2 40.01 1.04  
-4 4 2 40.17 0.93  
-4 4 2 39.65 1.25  
4 4 -2 40.97 1.04



|    |    |    |        |      |
|----|----|----|--------|------|
| 4  | 4  | -2 | 38.99  | 0.94 |
| 4  | 4  | -2 | 40.63  | 0.99 |
| -4 | 4  | 2  | 37.48  | 1.00 |
| 3  | -4 | -2 | 175.89 | 3.59 |
| -3 | -4 | 2  | 171.93 | 3.75 |
| 3  | -4 | -2 | 173.99 | 3.69 |
| -3 | -4 | 2  | 171.76 | 3.66 |
| -3 | -4 | 2  | 168.39 | 3.58 |
| 3  | -4 | -2 | 175.84 | 4.00 |
| -3 | 4  | 2  | 175.21 | 3.38 |
| 3  | 4  | -2 | 172.17 | 3.40 |
| -3 | 4  | 2  | 172.18 | 3.55 |
| -3 | 4  | 2  | 176.45 | 4.00 |
| 3  | 4  | -2 | 171.91 | 3.52 |
| 3  | 4  | -2 | 172.00 | 3.75 |
| -2 | -4 | 2  | 249.32 | 5.19 |
| 2  | -4 | -2 | 250.12 | 5.60 |
| 2  | -4 | -2 | 247.32 | 5.22 |
| 2  | -4 | -2 | 256.96 | 5.15 |
| -2 | -4 | 2  | 247.64 | 5.09 |
| -2 | 4  | 2  | 251.46 | 4.82 |
| -2 | 4  | 2  | 250.93 | 5.03 |
| -2 | 4  | 2  | 251.43 | 5.60 |
| 2  | 4  | -2 | 262.03 | 4.84 |
| 1  | -4 | -2 | 136.32 | 3.06 |
| 1  | -4 | -2 | 130.83 | 2.82 |
| -1 | -4 | 2  | 127.95 | 2.81 |
| -1 | -4 | 2  | 127.92 | 2.76 |
| 1  | -4 | -2 | 134.22 | 2.82 |
| 1  | 4  | -2 | 132.43 | 2.61 |
| -1 | 4  | 2  | 130.77 | 2.66 |
| -1 | 4  | 2  | 131.85 | 3.04 |
| -1 | 4  | 2  | 134.95 | 2.63 |
| 0  | -4 | 2  | 103.30 | 2.23 |
| 0  | -4 | -2 | 105.37 | 2.54 |
| 0  | -4 | 2  | 101.27 | 2.12 |
| 0  | -4 | 2  | 103.56 | 2.27 |
| 0  | -4 | -2 | 104.08 | 2.28 |
| 0  | -4 | 2  | 104.57 | 2.27 |
| 0  | 4  | 2  | 104.39 | 2.12 |
| 0  | 4  | -2 | 103.86 | 2.28 |
| 0  | 4  | 2  | 108.14 | 2.09 |
| 0  | 4  | 2  | 103.75 | 2.24 |
| 0  | 4  | -2 | 101.81 | 2.07 |
| 1  | -4 | 2  | 6.14   | 0.36 |
| -1 | -4 | -2 | 7.28   | 0.40 |

1 -4 2 6.89 0.28  
-1 -4 -2 7.09 0.22  
1 -4 2 6.40 0.32  
-1 -4 -2 7.55 0.38  
-1 -4 -2 6.58 0.40  
1 4 2 6.67 0.36  
-1 4 -2 6.74 0.27  
1 4 2 6.39 0.33  
-1 4 -2 7.19 0.33  
-1 4 -2 6.87 0.35  
2 -4 2 33.56 0.92  
-2 -4 -2 31.83 0.97  
-2 -4 -2 32.61 0.92  
2 -4 2 33.47 1.05  
2 -4 2 34.02 0.91  
-2 -4 -2 32.49 0.73  
-2 4 -2 32.23 0.89  
-2 4 -2 33.15 0.93  
-2 4 -2 32.11 0.72  
2 4 2 30.36 0.81  
2 4 2 32.61 0.97  
2 4 2 32.39 0.87  
-3 -4 -2 17.21 0.49  
3 -4 2 18.72 0.60  
-3 -4 -2 17.81 0.64  
3 -4 2 17.64 0.63  
-3 -4 -2 17.45 0.70  
3 -4 2 17.52 0.68  
3 4 2 17.98 0.57  
-3 4 -2 18.46 0.69  
-3 4 -2 17.06 0.62  
3 4 2 18.33 0.63  
-3 4 -2 17.82 0.43  
3 4 2 18.30 0.71  
4 -4 2 0.64 0.27  
-4 -4 -2 1.32 0.21  
4 -4 2 1.55 0.28  
-4 -4 -2 1.54 0.33  
4 -4 2 1.19 0.29  
-4 -4 -2 1.02 0.27  
-4 4 -2 1.37 0.11  
-4 4 -2 1.15 0.29  
4 4 2 1.42 0.29  
4 4 2 1.53 0.24  
4 4 2 0.91 0.29  
-4 4 -2 1.48 0.30

5 -4 2 3.50 0.40  
-5 -4 -2 3.59 0.41  
-5 -4 -2 2.96 0.44  
-5 -4 -2 3.69 0.31  
5 -4 2 3.55 0.41  
5 -4 2 3.12 0.41  
-5 4 -2 3.19 0.44  
-5 4 -2 3.83 0.42  
5 4 2 3.37 0.42  
5 4 2 3.73 0.42  
-6 -4 -2 12.25 0.64  
6 -4 2 13.22 0.67  
-6 -4 -2 13.45 0.81  
6 -4 2 13.52 0.64  
-6 -4 -2 12.62 0.56  
-6 4 -2 13.41 0.82  
6 4 2 12.71 0.68  
6 4 2 13.81 0.55  
-6 4 -2 13.03 0.66  
6 4 2 16.31 1.21  
-7 -4 -2 18.28 0.82  
7 -4 2 16.38 0.82  
-7 -4 -2 18.28 0.69  
7 -4 2 18.50 0.76  
7 4 2 18.63 0.83  
7 4 2 19.03 0.65  
-7 4 -2 16.68 0.79  
-8 -4 -2 0.20 0.36  
-8 -4 -2 0.08 0.26  
8 -4 2 -0.08 0.32  
8 -4 2 0.18 0.31  
8 4 2 0.77 0.37  
-8 4 -2 0.37 0.35  
-9 -4 -2 0.35 0.38  
9 -4 2 0.68 0.37  
9 -4 2 0.43 0.40  
-9 -4 -2 0.79 0.33  
-9 4 -2 0.20 0.36  
9 4 2 0.07 0.36  
-10 -4 -2 0.42 0.44  
10 -4 2 0.67 0.45  
10 -4 2 -0.24 0.39  
-10 -4 -2 -0.04 0.35  
-10 4 -2 -0.11 0.37  
10 4 2 0.39 0.42  
11 -4 2 -0.22 0.48

-11 4 -2 0.29 0.44  
11 4 2 0.14 0.46  
12 -4 2 0.03 0.50  
-12 4 -2 0.03 0.42  
12 4 2 -0.51 0.47  
-13 -5 2 0.63 0.49  
13 -5 -2 0.14 0.53  
-13 5 2 -0.07 0.46  
13 5 -2 -0.29 0.47  
12 -5 -2 1.65 0.56  
-12 -5 2 0.46 0.45  
-12 5 2 -0.02 0.44  
12 5 -2 0.72 0.47  
11 -5 -2 1.65 0.52  
-11 -5 2 1.30 0.45  
11 5 -2 1.68 0.45  
-11 5 2 1.06 0.45  
-10 -5 2 0.70 0.39  
10 -5 -2 0.55 0.40  
-10 5 2 0.18 0.32  
10 5 -2 0.36 0.35  
10 5 -2 0.51 0.33  
-9 -5 2 -0.40 0.29  
-9 -5 2 -0.46 0.34  
9 -5 -2 0.27 0.40  
9 5 -2 0.38 0.29  
9 5 -2 -0.59 0.29  
-9 5 2 0.18 0.29  
8 -5 -2 0.45 0.40  
8 -5 -2 0.82 0.28  
-8 -5 2 0.00 0.34  
-8 -5 2 1.07 0.35  
-8 -5 2 0.83 0.37  
8 5 -2 0.28 0.31  
8 5 -2 1.02 0.29  
8 5 -2 0.71 0.33  
-8 5 2 0.14 0.28  
-7 -5 2 1.58 0.36  
7 -5 -2 2.80 0.32  
7 -5 -2 3.07 0.49  
-7 -5 2 2.51 0.39  
7 5 -2 2.53 0.37  
-7 5 2 3.12 0.28  
-7 5 2 2.70 0.41  
7 5 -2 2.49 0.38  
7 5 -2 2.83 0.35

|    |    |    |       |      |
|----|----|----|-------|------|
| 6  | -5 | -2 | 0.18  | 0.22 |
| -6 | -5 | 2  | 0.02  | 0.26 |
| 6  | -5 | -2 | 0.50  | 0.35 |
| 6  | -5 | -2 | 0.13  | 0.31 |
| -6 | -5 | 2  | 0.00  | 0.28 |
| -6 | 5  | 2  | 0.16  | 0.21 |
| -6 | 5  | 2  | 0.40  | 0.29 |
| 6  | 5  | -2 | 0.20  | 0.24 |
| 6  | 5  | -2 | 0.40  | 0.25 |
| -6 | 5  | 2  | 0.19  | 0.34 |
| 6  | 5  | -2 | 0.21  | 0.24 |
| -5 | -5 | 2  | 6.96  | 0.52 |
| 5  | -5 | -2 | 6.19  | 0.54 |
| 5  | -5 | -2 | 7.41  | 0.42 |
| -5 | -5 | 2  | 7.04  | 0.47 |
| -5 | -5 | 2  | 6.25  | 0.44 |
| 5  | -5 | -2 | 7.49  | 0.54 |
| 5  | 5  | -2 | 6.61  | 0.38 |
| 5  | 5  | -2 | 5.73  | 0.42 |
| -5 | 5  | 2  | 6.21  | 0.45 |
| 5  | 5  | -2 | 6.04  | 0.41 |
| -5 | 5  | 2  | 6.94  | 0.37 |
| -5 | 5  | 2  | 7.28  | 0.62 |
| 4  | -5 | -2 | 30.33 | 0.84 |
| 4  | -5 | -2 | 31.41 | 0.94 |
| -4 | -5 | 2  | 30.19 | 0.83 |
| 4  | -5 | -2 | 29.95 | 1.05 |
| -4 | -5 | 2  | 29.29 | 0.87 |
| -4 | -5 | 2  | 30.19 | 0.95 |
| 4  | 5  | -2 | 30.75 | 0.83 |
| -4 | 5  | 2  | 29.93 | 0.79 |
| 4  | 5  | -2 | 29.28 | 0.75 |
| 4  | 5  | -2 | 30.16 | 0.83 |
| -4 | 5  | 2  | 30.00 | 1.08 |
| -4 | 5  | 2  | 28.95 | 0.84 |
| -3 | -5 | 2  | 57.29 | 1.33 |
| 3  | -5 | -2 | 57.51 | 1.45 |
| -3 | -5 | 2  | 56.99 | 1.44 |
| 3  | -5 | -2 | 59.62 | 1.61 |
| -3 | -5 | 2  | 58.38 | 1.39 |
| 3  | -5 | -2 | 58.30 | 1.38 |
| 3  | 5  | -2 | 58.32 | 1.34 |
| -3 | 5  | 2  | 59.60 | 1.31 |
| 3  | 5  | -2 | 57.23 | 1.24 |
| -3 | 5  | 2  | 57.39 | 1.61 |
| -3 | 5  | 2  | 58.69 | 1.55 |

|    |    |    |        |      |
|----|----|----|--------|------|
| 3  | 5  | -2 | 57.85  | 1.33 |
| -2 | -5 | 2  | 14.52  | 0.52 |
| 2  | -5 | -2 | 14.90  | 0.54 |
| 2  | -5 | -2 | 14.08  | 0.66 |
| 2  | -5 | -2 | 15.10  | 0.58 |
| -2 | -5 | 2  | 15.48  | 0.59 |
| 2  | 5  | -2 | 14.47  | 0.51 |
| -2 | 5  | 2  | 14.89  | 0.50 |
| -2 | 5  | 2  | 13.80  | 0.63 |
| -2 | 5  | 2  | 15.33  | 0.47 |
| -1 | -5 | 2  | 114.86 | 2.45 |
| 1  | -5 | -2 | 115.79 | 2.52 |
| -1 | -5 | 2  | 111.18 | 2.50 |
| -1 | 5  | 2  | 113.99 | 2.33 |
| -1 | 5  | 2  | 112.82 | 2.33 |
| 1  | 5  | -2 | 113.25 | 2.30 |
| -1 | 5  | 2  | 112.26 | 2.68 |
| 0  | -5 | -2 | 11.62  | 0.55 |
| 0  | -5 | 2  | 12.33  | 0.54 |
| 0  | -5 | 2  | 12.09  | 0.33 |
| 0  | -5 | 2  | 12.08  | 0.37 |
| 0  | 5  | -2 | 12.01  | 0.43 |
| 0  | 5  | 2  | 12.24  | 0.35 |
| 0  | 5  | -2 | 11.83  | 0.40 |
| 0  | 5  | 2  | 12.19  | 0.47 |
| 0  | 5  | 2  | 11.77  | 0.46 |
| 1  | -5 | 2  | 1.38   | 0.19 |
| -1 | -5 | -2 | 1.26   | 0.24 |
| 1  | -5 | 2  | 1.70   | 0.17 |
| 1  | -5 | 2  | 1.29   | 0.27 |
| -1 | -5 | -2 | 1.34   | 0.29 |
| -1 | -5 | -2 | 1.69   | 0.14 |
| -1 | 5  | -2 | 1.28   | 0.21 |
| 1  | 5  | 2  | 1.11   | 0.22 |
| 1  | 5  | 2  | 1.01   | 0.22 |
| -1 | 5  | -2 | 1.35   | 0.24 |
| -1 | 5  | -2 | 1.03   | 0.18 |
| 2  | -5 | 2  | 94.35  | 2.04 |
| -2 | -5 | -2 | 92.94  | 2.17 |
| 2  | -5 | 2  | 94.17  | 2.13 |
| -2 | -5 | -2 | 92.83  | 2.27 |
| -2 | -5 | -2 | 93.33  | 1.92 |
| 2  | -5 | 2  | 91.48  | 2.20 |
| 2  | 5  | 2  | 91.30  | 1.98 |
| -2 | 5  | -2 | 94.60  | 1.88 |
| 2  | 5  | 2  | 93.66  | 2.08 |

|    |    |    |       |      |
|----|----|----|-------|------|
| -2 | 5  | -2 | 93.39 | 2.11 |
| -2 | 5  | -2 | 92.53 | 2.22 |
| 2  | 5  | 2  | 94.28 | 2.27 |
| 3  | -5 | 2  | 14.86 | 0.62 |
| -3 | -5 | -2 | 15.02 | 0.67 |
| -3 | -5 | -2 | 14.67 | 0.45 |
| -3 | -5 | -2 | 14.28 | 0.65 |
| -3 | 5  | -2 | 14.50 | 0.43 |
| -3 | 5  | -2 | 14.40 | 0.63 |
| 3  | 5  | 2  | 16.19 | 0.68 |
| -3 | 5  | -2 | 16.17 | 0.63 |
| 3  | 5  | 2  | 14.72 | 0.57 |
| 3  | 5  | 2  | 13.36 | 0.59 |
| 4  | -5 | 2  | 19.33 | 0.80 |
| -4 | -5 | -2 | 19.58 | 0.84 |
| -4 | -5 | -2 | 20.58 | 0.79 |
| 4  | -5 | 2  | 18.82 | 0.71 |
| -4 | -5 | -2 | 18.78 | 0.58 |
| 4  | -5 | 2  | 17.51 | 0.69 |
| -4 | 5  | -2 | 17.99 | 0.47 |
| 4  | 5  | 2  | 19.53 | 0.67 |
| -4 | 5  | -2 | 20.07 | 0.82 |
| 4  | 5  | 2  | 19.64 | 0.72 |
| -4 | 5  | -2 | 17.19 | 0.71 |
| 4  | 5  | 2  | 19.97 | 0.81 |
| -5 | -5 | -2 | 4.37  | 0.47 |
| 5  | -5 | 2  | 4.46  | 0.44 |
| 5  | -5 | 2  | 2.71  | 0.39 |
| 5  | -5 | 2  | 3.40  | 0.42 |
| -5 | -5 | -2 | 4.24  | 0.48 |
| -5 | -5 | -2 | 5.43  | 0.37 |
| 5  | 5  | 2  | 3.63  | 0.42 |
| 5  | 5  | 2  | 4.77  | 0.40 |
| 5  | 5  | 2  | 2.78  | 0.42 |
| -5 | 5  | -2 | 5.13  | 0.52 |
| -5 | 5  | -2 | 3.53  | 0.41 |
| -6 | -5 | -2 | 11.44 | 0.77 |
| -6 | -5 | -2 | 12.69 | 0.56 |
| 6  | -5 | 2  | 11.42 | 0.63 |
| -6 | -5 | -2 | 12.76 | 0.67 |
| 6  | -5 | 2  | 11.49 | 0.68 |
| 6  | 5  | 2  | 12.28 | 0.68 |
| -6 | 5  | -2 | 11.30 | 0.69 |
| 7  | -5 | 2  | 2.50  | 0.40 |
| -7 | -5 | -2 | 1.93  | 0.39 |
| -7 | -5 | -2 | 1.55  | 0.31 |

7 -5 2 1.83 0.41  
7 5 2 1.90 0.41  
-7 5 -2 1.66 0.41  
7 5 2 2.11 0.31  
-8 -5 -2 0.53 0.31  
8 -5 2 1.62 0.44  
8 -5 2 0.94 0.36  
-8 -5 -2 1.19 0.42  
8 5 2 1.68 0.42  
-8 5 -2 1.13 0.38  
8 5 2 1.20 0.30  
9 -5 2 0.00 0.32  
-9 -5 -2 0.15 0.39  
9 -5 2 0.23 0.36  
-9 5 -2 -0.04 0.38  
9 5 2 0.16 0.39  
10 -5 2 -0.04 0.42  
-10 -5 -2 -0.13 0.42  
-10 5 -2 0.17 0.41  
10 5 2 0.41 0.43  
11 -5 2 0.91 0.54  
11 5 2 0.33 0.49  
-11 5 -2 -0.04 0.45  
12 -5 2 0.27 0.57  
-12 5 -2 -0.49 0.43  
12 5 2 0.73 0.54  
-13 -6 2 0.69 0.49  
-12 -6 2 0.18 0.44  
12 -6 -2 0.44 0.49  
-12 6 2 -0.21 0.39  
-11 -6 2 -0.04 0.38  
11 -6 -2 0.22 0.45  
-11 6 2 -0.11 0.36  
11 6 -2 -0.11 0.36  
-10 -6 2 0.62 0.39  
10 -6 -2 1.22 0.47  
-10 6 2 0.86 0.36  
10 6 -2 1.08 0.34  
10 6 -2 0.65 0.38  
-9 -6 2 2.37 0.75  
-9 -6 2 3.37 0.46  
9 -6 -2 3.37 0.55  
-9 6 2 2.26 0.42  
9 6 -2 2.80 0.39  
9 6 -2 3.21 0.44  
8 -6 -2 2.35 0.47



|    |    |    |       |      |
|----|----|----|-------|------|
| -8 | -6 | 2  | 2.61  | 0.41 |
| 8  | 6  | -2 | 2.63  | 0.39 |
| -8 | 6  | 2  | 1.30  | 0.38 |
| 8  | 6  | -2 | 2.67  | 0.39 |
| -7 | -6 | 2  | 0.47  | 0.31 |
| 7  | -6 | -2 | 0.19  | 0.26 |
| 7  | -6 | -2 | 0.18  | 0.38 |
| -7 | -6 | 2  | 0.11  | 0.38 |
| -7 | -6 | 2  | 0.27  | 0.30 |
| 7  | 6  | -2 | 0.52  | 0.28 |
| 7  | 6  | -2 | -0.09 | 0.30 |
| 7  | 6  | -2 | 0.50  | 0.28 |
| -7 | 6  | 2  | 0.52  | 0.32 |
| -7 | 6  | 2  | 0.21  | 0.22 |
| 6  | -6 | -2 | 1.01  | 0.39 |
| -6 | -6 | 2  | 1.20  | 0.33 |
| -6 | -6 | 2  | 1.08  | 0.29 |
| -6 | -6 | 2  | 1.11  | 0.41 |
| 6  | -6 | -2 | 0.83  | 0.27 |
| -6 | 6  | 2  | 1.11  | 0.25 |
| -6 | 6  | 2  | 0.61  | 0.40 |
| 6  | 6  | -2 | 0.96  | 0.30 |
| -6 | 6  | 2  | 1.24  | 0.34 |
| 6  | 6  | -2 | 1.08  | 0.29 |
| 6  | 6  | -2 | 1.14  | 0.28 |
| -5 | -6 | 2  | 12.39 | 0.66 |
| 5  | -6 | -2 | 10.66 | 0.64 |
| -5 | -6 | 2  | 11.23 | 0.57 |
| 5  | -6 | -2 | 11.68 | 0.53 |
| -5 | -6 | 2  | 11.32 | 0.53 |
| 5  | -6 | -2 | 11.19 | 0.73 |
| -5 | 6  | 2  | 10.54 | 0.74 |
| -5 | 6  | 2  | 10.89 | 0.48 |
| 5  | 6  | -2 | 11.38 | 0.46 |
| -5 | 6  | 2  | 10.99 | 0.57 |
| 5  | 6  | -2 | 11.31 | 0.55 |
| 5  | 6  | -2 | 11.16 | 0.52 |
| -4 | -6 | 2  | 4.78  | 0.49 |
| -4 | -6 | 2  | 4.86  | 0.32 |
| -4 | -6 | 2  | 3.79  | 0.35 |
| 4  | -6 | -2 | 4.17  | 0.47 |
| 4  | -6 | -2 | 4.00  | 0.42 |
| 4  | -6 | -2 | 5.02  | 0.40 |
| -4 | 6  | 2  | 4.52  | 0.49 |
| -4 | 6  | 2  | 4.54  | 0.36 |
| 4  | 6  | -2 | 4.10  | 0.37 |

|    |    |    |       |      |
|----|----|----|-------|------|
| 4  | 6  | -2 | 4.84  | 0.29 |
| -4 | 6  | 2  | 5.35  | 0.38 |
| 4  | 6  | -2 | 4.65  | 0.33 |
| -3 | -6 | 2  | 2.23  | 0.41 |
| 3  | -6 | -2 | 1.81  | 0.31 |
| -3 | -6 | 2  | 2.39  | 0.30 |
| -3 | -6 | 2  | 2.32  | 0.17 |
| 3  | -6 | -2 | 2.58  | 0.38 |
| 3  | -6 | -2 | 1.29  | 0.31 |
| -3 | -6 | 2  | 2.32  | 0.18 |
| -3 | 6  | 2  | 2.30  | 0.35 |
| -3 | 6  | 2  | 2.31  | 0.27 |
| 3  | 6  | -2 | 2.11  | 0.28 |
| 3  | 6  | -2 | 2.09  | 0.16 |
| 2  | -6 | -2 | 79.61 | 2.26 |
| -2 | -6 | 2  | 78.70 | 1.90 |
| -2 | -6 | 2  | 79.16 | 1.81 |
| 2  | -6 | -2 | 77.96 | 1.91 |
| 2  | -6 | -2 | 79.03 | 1.86 |
| 2  | 6  | -2 | 79.19 | 1.74 |
| -2 | 6  | 2  | 78.18 | 1.73 |
| -2 | 6  | 2  | 79.19 | 2.03 |
| -2 | 6  | 2  | 77.83 | 1.73 |
| 1  | -6 | -2 | 0.92  | 0.29 |
| -1 | -6 | 2  | 0.52  | 0.23 |
| -1 | -6 | 2  | 0.72  | 0.27 |
| -1 | 6  | 2  | 0.85  | 0.16 |
| 1  | 6  | -2 | 0.93  | 0.21 |
| -1 | 6  | 2  | 0.45  | 0.22 |
| -1 | 6  | 2  | 0.52  | 0.23 |
| 0  | -6 | 2  | 0.26  | 0.11 |
| 0  | -6 | 2  | 0.28  | 0.11 |
| 0  | -6 | -2 | 0.79  | 0.31 |
| 0  | -6 | -2 | 0.09  | 0.21 |
| 0  | -6 | 2  | 0.72  | 0.30 |
| 0  | -6 | -2 | 0.42  | 0.21 |
| 0  | 6  | -2 | 0.42  | 0.21 |
| 0  | 6  | -2 | 0.21  | 0.13 |
| 0  | 6  | 2  | 0.20  | 0.13 |
| 0  | 6  | -2 | 0.10  | 0.17 |
| 0  | 6  | 2  | 0.19  | 0.21 |
| 1  | -6 | 2  | 27.65 | 0.89 |
| 1  | -6 | 2  | 28.98 | 0.79 |
| -1 | -6 | -2 | 28.49 | 0.92 |
| -1 | -6 | -2 | 29.10 | 0.91 |
| 1  | -6 | 2  | 27.49 | 0.71 |

-1 -6 -2 28.07 0.91  
-1 6 -2 27.85 0.84  
-1 6 -2 28.00 0.83  
1 6 2 28.84 0.82  
1 6 2 28.62 0.81  
-1 6 -2 27.42 0.75  
-2 -6 -2 3.01 0.21  
-2 -6 -2 3.85 0.42  
2 -6 2 2.74 0.37  
2 -6 2 2.78 0.28  
-2 -6 -2 2.28 0.36  
2 -6 2 2.90 0.26  
-2 -6 -2 2.49 0.31  
-2 6 -2 3.16 0.34  
-2 6 -2 2.69 0.33  
2 6 2 3.14 0.33  
-2 6 -2 2.50 0.25  
2 6 2 2.47 0.32  
3 -6 2 34.07 0.95  
-3 -6 -2 34.83 0.85  
3 -6 2 35.57 1.08  
-3 -6 -2 35.23 1.11  
-3 -6 -2 34.27 1.09  
3 -6 2 34.36 1.05  
3 6 2 34.85 1.12  
-3 6 -2 33.28 0.83  
3 6 2 34.86 1.00  
3 6 2 35.22 0.97  
-3 6 -2 33.98 1.10  
-3 6 -2 34.76 1.05  
4 -6 2 5.73 0.50  
4 -6 2 6.23 0.54  
-4 -6 -2 6.50 0.36  
-4 -6 -2 6.58 0.57  
-4 -6 -2 6.38 0.53  
4 -6 2 5.88 0.48  
4 6 2 7.16 0.53  
4 6 2 7.78 0.58  
-4 6 -2 6.29 0.32  
4 6 2 7.37 0.50  
-4 6 -2 6.22 0.52  
-4 6 -2 7.12 0.56  
-5 -6 -2 6.92 0.41  
5 -6 2 7.88 0.56  
5 -6 2 7.22 0.55  
-5 -6 -2 7.33 0.61

5 -6 2 7.66 0.60  
-5 -6 -2 7.62 0.59  
5 6 2 7.30 0.55  
5 6 2 6.11 0.55  
5 6 2 8.17 0.52  
-5 6 -2 8.33 0.67  
-5 6 -2 8.33 0.57  
-6 -6 -2 0.28 0.39  
6 -6 2 0.57 0.33  
-6 -6 -2 0.56 0.26  
-6 -6 -2 0.45 0.34  
6 -6 2 0.70 0.33  
6 6 2 -0.02 0.23  
-6 6 -2 0.34 0.29  
6 6 2 0.81 0.34  
-7 -6 -2 5.50 0.58  
7 -6 2 4.51 0.46  
7 -6 2 4.98 0.54  
-7 -6 -2 5.83 0.46  
-7 6 -2 4.87 0.52  
7 6 2 4.75 0.52  
-8 -6 -2 2.63 0.52  
8 -6 2 3.42 0.47  
8 -6 2 3.60 0.53  
-8 6 -2 3.51 0.52  
8 6 2 3.25 0.50  
9 -6 2 -0.16 0.41  
-9 -6 -2 0.09 0.41  
9 -6 2 0.42 0.36  
-9 6 -2 0.10 0.34  
9 6 2 0.35 0.40  
-10 -6 -2 0.36 0.50  
10 -6 2 0.01 0.44  
10 6 2 0.46 0.46  
-10 6 -2 0.76 0.45  
11 -6 2 0.04 0.51  
-11 -6 -2 -0.95 0.55  
-11 6 -2 0.39 0.48  
11 6 2 0.64 0.50  
12 6 2 0.39 0.55  
-12 -7 2 0.15 0.52  
12 -7 -2 0.52 0.51  
-12 7 2 0.27 0.47  
-11 -7 2 0.10 0.41  
11 -7 -2 -0.18 0.47  
-11 7 2 0.42 0.40

11 7 -2 0.82 0.43  
-10 -7 2 0.14 0.36  
10 -7 -2 0.33 0.44  
10 7 -2 0.23 0.37  
-10 7 2 -0.29 0.31  
-9 -7 2 2.50 0.43  
9 -7 -2 3.01 0.53  
9 7 -2 2.52 0.44  
-9 7 2 2.63 0.48  
8 -7 -2 2.26 0.48  
-8 -7 2 2.74 0.53  
-8 -7 2 1.74 0.37  
-8 7 2 2.39 0.41  
8 7 -2 2.77 0.41  
-7 -7 2 0.09 0.27  
-7 -7 2 -0.42 0.38  
7 -7 -2 0.14 0.27  
7 -7 -2 0.21 0.36  
7 7 -2 0.09 0.28  
-7 7 2 0.01 0.21  
-7 7 2 -0.12 0.26  
7 7 -2 -0.13 0.26  
6 -7 -2 10.67 0.70  
-6 -7 2 10.42 0.76  
6 -7 -2 11.55 0.59  
-6 -7 2 10.47 0.60  
-6 7 2 11.18 0.64  
6 7 -2 11.04 0.52  
6 7 -2 11.22 0.60  
-6 7 2 10.41 0.50  
-5 -7 2 4.55 0.42  
5 -7 -2 3.43 0.39  
5 -7 -2 4.04 0.53  
5 -7 -2 4.07 0.46  
-5 -7 2 4.10 0.55  
-5 -7 2 4.46 0.34  
5 7 -2 4.16 0.34  
-5 7 2 4.57 0.56  
5 7 -2 4.10 0.45  
-5 7 2 4.45 0.43  
5 7 -2 4.50 0.32  
-5 7 2 4.28 0.37  
4 -7 -2 2.67 0.40  
4 -7 -2 1.88 0.41  
-4 -7 2 3.27 0.26  
-4 -7 2 3.45 0.37

-4 -7 2 3.00 0.49  
4 -7 -2 3.33 0.39  
-4 7 2 3.20 0.33  
-4 7 2 2.69 0.45  
4 7 -2 2.84 0.25  
4 7 -2 3.49 0.34  
-4 7 2 3.83 0.37  
4 7 -2 3.18 0.38  
-3 -7 2 9.21 0.51  
3 -7 -2 9.31 0.57  
-3 -7 2 9.14 0.61  
-3 -7 2 9.39 0.34  
3 -7 -2 9.82 0.60  
3 -7 -2 9.19 0.67  
-3 -7 2 9.59 0.32  
3 7 -2 10.12 0.53  
-3 7 2 9.82 0.53  
-3 7 2 10.77 0.67  
-2 -7 2 6.35 0.44  
2 -7 -2 4.88 0.46  
-2 -7 2 5.65 0.50  
2 7 -2 5.96 0.44  
-2 7 2 5.60 0.41  
-2 7 2 5.29 0.47  
-2 7 2 6.06 0.37  
-1 -7 2 8.27 0.44  
-1 -7 2 8.49 0.55  
1 -7 -2 7.11 0.55  
1 -7 -2 9.39 0.62  
1 -7 -2 8.15 0.49  
-1 7 2 9.07 0.48  
-1 7 2 7.16 0.52  
1 7 -2 8.71 0.46  
-1 7 2 8.62 0.37  
0 -7 -2 0.51 0.24  
0 -7 2 0.49 0.35  
0 -7 -2 0.96 0.28  
0 -7 -2 0.68 0.24  
0 -7 2 0.78 0.15  
0 -7 -2 0.39 0.33  
0 -7 2 1.07 0.14  
0 7 -2 0.81 0.17  
0 7 2 0.76 0.18  
0 7 2 0.49 0.26  
0 7 -2 0.52 0.25  
0 7 -2 0.60 0.23

1 -7 2 24.77 0.89  
-1 -7 -2 23.80 0.85  
1 -7 2 23.68 0.71  
-1 -7 -2 24.23 0.87  
1 -7 2 23.00 0.63  
-1 -7 -2 24.02 0.90  
-1 7 -2 23.11 0.81  
1 7 2 23.58 0.63  
1 7 2 23.26 0.78  
-1 7 -2 25.90 0.74  
-1 7 -2 23.26 0.76  
1 7 2 24.31 0.76  
2 -7 2 5.62 0.37  
-2 -7 -2 6.05 0.32  
2 -7 2 4.94 0.46  
-2 -7 -2 5.80 0.46  
-2 -7 -2 6.53 0.57  
-2 -7 -2 6.16 0.48  
2 -7 2 5.88 0.42  
2 7 2 5.46 0.43  
-2 7 -2 6.26 0.45  
2 7 2 6.42 0.43  
-2 7 -2 5.49 0.37  
-2 7 -2 5.70 0.44  
3 -7 2 7.07 0.54  
3 -7 2 7.19 0.44  
-3 -7 -2 6.74 0.52  
3 -7 2 6.35 0.49  
-3 -7 -2 6.87 0.52  
-3 -7 -2 7.22 0.35  
-3 -7 -2 5.69 0.54  
3 7 2 7.49 0.49  
3 7 2 6.09 0.45  
-3 7 -2 6.76 0.53  
-3 7 -2 6.26 0.39  
-3 7 -2 6.84 0.52  
-4 -7 -2 28.84 0.79  
-4 -7 -2 29.07 1.09  
4 -7 2 27.42 0.96  
-4 -7 -2 28.79 1.06  
-4 7 -2 27.81 0.75  
4 7 2 30.15 0.95  
4 7 2 30.79 0.95  
-4 7 -2 29.72 1.10  
-4 7 -2 28.55 0.99  
4 7 2 28.28 1.06

-5 -7 -2 0.86 0.43  
-5 -7 -2 0.67 0.26  
-5 -7 -2 0.61 0.34  
5 -7 2 0.46 0.32  
5 -7 2 0.89 0.33  
5 -7 2 1.26 0.37  
5 7 2 0.90 0.35  
-5 7 -2 0.50 0.31  
5 7 2 0.50 0.33  
5 7 2 0.91 0.32  
-5 7 -2 0.29 0.35  
6 -7 2 1.79 0.37  
-6 -7 -2 1.12 0.39  
6 -7 2 2.61 0.42  
6 7 2 2.50 0.35  
6 7 2 1.89 0.41  
-6 7 -2 1.61 0.40  
7 -7 2 5.40 0.52  
7 -7 2 4.98 0.53  
-7 -7 -2 4.35 0.55  
7 7 2 6.10 0.51  
-7 7 -2 5.19 0.58  
7 7 2 4.59 0.52  
8 -7 2 0.89 0.41  
8 -7 2 0.78 0.35  
-8 -7 -2 -0.20 0.36  
-8 7 -2 0.17 0.34  
8 7 2 0.27 0.32  
8 7 2 0.92 0.41  
9 -7 2 0.28 0.43  
-9 -7 -2 0.11 0.45  
9 -7 2 -0.05 0.37  
-9 7 -2 -0.20 0.39  
9 7 2 0.36 0.42  
10 -7 2 -0.24 0.44  
-10 -7 -2 -0.81 0.49  
-10 7 -2 -0.70 0.40  
10 7 2 -0.12 0.45  
-11 -7 -2 0.21 0.61  
11 -7 2 0.12 0.52  
-11 7 -2 0.30 0.51  
11 7 2 1.26 0.53  
12 -8 -2 0.90 0.55  
-12 8 2 0.24 0.43  
11 -8 -2 -0.51 0.44  
11 8 -2 0.29 0.38



-11 8 2 -0.21 0.37  
-10 -8 2 0.20 0.38  
10 -8 -2 0.31 0.47  
10 8 -2 -0.04 0.38  
-10 8 2 0.22 0.42  
9 -8 -2 0.66 0.45  
-9 -8 2 0.11 0.49  
-9 -8 2 1.19 0.39  
-9 8 2 0.83 0.36  
9 8 -2 0.62 0.34  
-8 -8 2 0.75 0.46  
-8 -8 2 2.02 0.41  
8 -8 -2 1.33 0.46  
8 8 -2 1.72 0.38  
-8 8 2 2.27 0.46  
7 -8 -2 1.30 0.42  
-7 -8 2 0.74 0.46  
-7 -8 2 0.58 0.33  
7 -8 -2 1.34 0.34  
-7 8 2 1.10 0.30  
7 8 -2 1.02 0.37  
-7 8 2 1.16 0.37  
6 -8 -2 1.49 0.40  
-6 -8 2 1.47 0.48  
6 -8 -2 1.91 0.35  
-6 -8 2 1.82 0.34  
-6 8 2 1.46 0.32  
6 8 -2 1.66 0.35  
-6 8 2 2.07 0.31  
5 -8 -2 5.05 0.50  
-5 -8 2 5.23 0.46  
5 -8 -2 5.27 0.47  
-5 -8 2 6.14 0.63  
-5 8 2 3.66 0.54  
-5 8 2 4.19 0.43  
-5 8 2 4.96 0.42  
5 8 -2 4.54 0.48  
-4 -8 2 4.07 0.52  
4 -8 -2 2.96 0.44  
-4 -8 2 3.79 0.41  
4 -8 -2 3.20 0.48  
4 -8 -2 3.78 0.44  
-4 8 2 3.46 0.37  
-4 8 2 4.39 0.53  
-4 8 2 3.42 0.40  
4 8 -2 3.37 0.41

|    |    |    |       |      |
|----|----|----|-------|------|
| 3  | -8 | -2 | 8.63  | 0.55 |
| -3 | -8 | 2  | 8.05  | 0.51 |
| -3 | -8 | 2  | 8.14  | 0.66 |
| -3 | 8  | 2  | 7.48  | 0.70 |
| -3 | 8  | 2  | 8.49  | 0.55 |
| -3 | 8  | 2  | 8.81  | 0.63 |
| 3  | 8  | -2 | 8.28  | 0.52 |
| -2 | -8 | 2  | 2.17  | 0.43 |
| -2 | -8 | 2  | 2.18  | 0.33 |
| 2  | -8 | -2 | 1.89  | 0.39 |
| 2  | -8 | -2 | 2.13  | 0.36 |
| 2  | -8 | -2 | 2.26  | 0.40 |
| -2 | 8  | 2  | 1.82  | 0.33 |
| -2 | 8  | 2  | 1.39  | 0.35 |
| 2  | 8  | -2 | 1.88  | 0.33 |
| -2 | 8  | 2  | 2.42  | 0.28 |
| 1  | -8 | -2 | 3.78  | 0.39 |
| -1 | -8 | 2  | 3.02  | 0.46 |
| 1  | -8 | -2 | 3.08  | 0.41 |
| 1  | -8 | -2 | 3.44  | 0.47 |
| -1 | 8  | 2  | 3.41  | 0.29 |
| -1 | 8  | 2  | 2.72  | 0.36 |
| 1  | 8  | -2 | 2.58  | 0.38 |
| -1 | 8  | 2  | 3.43  | 0.39 |
| 0  | -8 | 2  | 33.22 | 1.13 |
| 0  | -8 | -2 | 33.88 | 1.08 |
| 0  | -8 | 2  | 34.51 | 0.87 |
| 0  | -8 | 2  | 34.30 | 0.87 |
| 0  | -8 | -2 | 34.88 | 1.14 |
| 0  | -8 | -2 | 35.10 | 1.19 |
| 0  | -8 | -2 | 34.44 | 1.00 |
| 0  | 8  | 2  | 31.78 | 1.00 |
| 0  | 8  | -2 | 33.05 | 0.96 |
| 0  | 8  | -2 | 33.91 | 1.01 |
| 0  | 8  | -2 | 34.12 | 0.90 |
| 0  | 8  | 2  | 33.63 | 0.88 |
| -1 | -8 | -2 | 2.09  | 0.34 |
| 1  | -8 | 2  | 1.47  | 0.38 |
| 1  | -8 | 2  | 1.80  | 0.22 |
| -1 | -8 | -2 | 1.67  | 0.49 |
| 1  | -8 | 2  | 1.60  | 0.24 |
| -1 | -8 | -2 | 2.08  | 0.33 |
| -1 | 8  | -2 | 2.31  | 0.33 |
| -1 | 8  | -2 | 2.54  | 0.37 |
| 1  | 8  | 2  | 1.43  | 0.20 |
| 1  | 8  | 2  | 2.40  | 0.35 |

-1 8 -2 1.76 0.28  
-2 -8 -2 0.23 0.24  
-2 -8 -2 0.20 0.42  
-2 -8 -2 0.62 0.27  
2 -8 2 0.13 0.35  
2 -8 2 0.34 0.22  
2 -8 2 -0.02 0.21  
-2 -8 -2 0.17 0.17  
2 8 2 -0.06 0.27  
-2 8 -2 0.03 0.24  
2 8 2 -0.23 0.26  
-2 8 -2 0.13 0.29  
-2 8 -2 0.31 0.25  
-3 -8 -2 10.07 0.76  
-3 -8 -2 11.35 0.49  
3 -8 2 10.89 0.60  
3 -8 2 10.02 0.67  
3 -8 2 10.57 0.53  
-3 -8 -2 10.78 0.64  
-3 -8 -2 10.88 0.64  
-3 8 -2 10.19 0.59  
3 8 2 10.17 0.57  
-3 8 -2 9.44 0.65  
3 8 2 11.05 0.59  
-3 8 -2 10.44 0.48  
4 -8 2 2.89 0.39  
-4 -8 -2 2.88 0.41  
-4 -8 -2 2.91 0.41  
4 -8 2 2.79 0.37  
4 -8 2 2.57 0.41  
-4 -8 -2 3.07 0.49  
4 8 2 3.24 0.40  
-4 8 -2 4.17 0.49  
4 8 2 3.54 0.41  
-4 8 -2 2.58 0.29  
-4 8 -2 2.42 0.43  
-5 -8 -2 1.39 0.39  
5 -8 2 0.89 0.36  
-5 -8 -2 1.09 0.42  
5 8 2 1.90 0.38  
5 8 2 0.89 0.35  
-5 8 -2 1.31 0.38  
5 8 2 1.25 0.32  
-5 8 -2 0.37 0.37  
6 -8 2 1.48 0.39  
6 -8 2 0.76 0.35

-6 -8 -2 1.82 0.51  
-6 8 -2 1.65 0.39  
6 8 2 1.56 0.40  
6 8 2 1.75 0.38  
-7 -8 -2 -0.32 0.36  
7 -8 2 0.01 0.35  
7 -8 2 0.13 0.34  
7 8 2 -0.22 0.27  
7 8 2 0.07 0.36  
-7 8 -2 -0.06 0.32  
-8 -8 -2 -0.43 0.44  
8 -8 2 0.98 0.43  
8 -8 2 -0.14 0.36  
8 8 2 -0.23 0.36  
-8 8 -2 0.19 0.36  
8 8 2 0.26 0.34  
-9 -8 -2 -0.69 0.47  
9 -8 2 -0.50 0.38  
9 -8 2 -0.02 0.42  
9 8 2 -0.15 0.44  
-9 8 -2 0.11 0.46  
-10 -8 -2 0.06 0.56  
10 -8 2 0.34 0.51  
-10 8 -2 0.90 0.50  
11 -8 2 0.86 0.58  
-11 -8 -2 -0.47 0.60  
11 -9 -2 1.08 0.56  
-11 9 2 -0.40 0.39  
11 9 -2 0.19 0.47  
10 -9 -2 1.43 0.53  
-10 9 2 0.73 0.48  
10 9 -2 0.24 0.39  
-9 -9 2 -0.05 0.35  
-9 -9 2 -1.34 0.45  
9 -9 -2 -0.22 0.42  
9 9 -2 0.22 0.34  
-9 9 2 -0.78 0.35  
-8 -9 2 0.58 0.50  
-8 -9 2 0.84 0.36  
8 -9 -2 0.08 0.41  
-8 9 2 0.40 0.38  
8 9 -2 1.02 0.37  
7 -9 -2 1.96 0.38  
-7 -9 2 1.00 0.51  
7 -9 -2 1.91 0.45  
-7 -9 2 1.89 0.38

-7 9 2 0.85 0.38  
7 9 -2 0.84 0.34  
-6 -9 2 0.39 0.28  
6 -9 -2 0.12 0.36  
6 -9 -2 -0.13 0.29  
-6 -9 2 -0.21 0.43  
6 9 -2 -0.11 0.28  
-6 9 2 0.03 0.24  
-6 9 2 0.09 0.30  
-5 -9 2 0.84 0.31  
-5 -9 2 0.48 0.45  
5 -9 -2 0.48 0.36  
5 -9 -2 0.69 0.33  
5 9 -2 0.28 0.30  
-5 9 2 0.74 0.30  
-5 9 2 0.67 0.31  
-4 -9 2 16.20 0.69  
4 -9 -2 15.19 0.74  
-4 -9 2 15.51 0.83  
-4 9 2 13.95 0.86  
-4 9 2 15.68 0.99  
4 9 -2 15.80 0.72  
-4 9 2 15.22 0.67  
-3 -9 2 0.22 0.28  
3 -9 -2 -0.08 0.34  
-3 -9 2 -0.18 0.43  
3 -9 -2 0.34 0.33  
3 -9 -2 0.33 0.36  
3 9 -2 0.11 0.30  
-3 9 2 0.05 0.23  
-3 9 2 0.30 0.32  
-3 9 2 0.31 0.34  
-2 -9 2 14.92 0.84  
2 -9 -2 13.51 0.81  
2 -9 -2 13.46 0.70  
2 -9 -2 15.20 0.81  
-2 -9 2 13.15 0.64  
2 9 -2 13.58 0.66  
-2 9 2 13.49 0.66  
-2 9 2 14.30 0.77  
-2 9 2 14.62 0.58  
1 -9 -2 4.75 0.59  
1 -9 -2 4.88 0.46  
-1 -9 2 3.91 0.51  
1 -9 -2 4.28 0.50  
-1 9 2 2.98 0.41

-1 9 2 4.55 0.35  
-1 9 2 4.47 0.46  
1 9 -2 4.11 0.46  
1 9 -2 4.62 0.44  
0 -9 2 3.71 0.50  
0 -9 -2 4.31 0.47  
0 -9 -2 6.58 0.49  
0 -9 -2 4.94 0.56  
0 -9 -2 4.18 0.42  
0 9 2 4.66 0.47  
0 9 -2 3.86 0.41  
0 9 2 5.07 0.35  
0 9 -2 4.23 0.43  
-1 -9 -2 2.74 0.42  
-1 -9 -2 2.06 0.48  
-1 -9 -2 3.08 0.38  
1 -9 2 2.51 0.48  
-1 -9 -2 3.52 0.40  
1 9 2 2.15 0.39  
-1 9 -2 2.90 0.40  
-1 9 -2 3.06 0.36  
1 9 2 2.62 0.41  
-2 -9 -2 4.47 0.44  
2 -9 2 3.13 0.47  
-2 -9 -2 3.82 0.57  
-2 -9 -2 3.90 0.46  
2 9 2 3.97 0.40  
2 9 2 3.25 0.42  
-2 9 -2 3.87 0.45  
-2 9 -2 4.92 0.42  
3 -9 2 0.83 0.28  
-3 -9 -2 0.33 0.37  
3 -9 2 0.47 0.33  
-3 -9 -2 0.48 0.40  
3 9 2 0.31 0.30  
3 9 2 0.49 0.29  
-3 9 -2 0.53 0.26  
-3 9 -2 0.81 0.31  
4 -9 2 2.49 0.44  
4 -9 2 3.08 0.37  
-4 -9 -2 1.74 0.52  
4 9 2 2.32 0.38  
-4 9 -2 1.87 0.40  
4 9 2 2.55 0.39  
5 -9 2 0.88 0.37  
5 -9 2 2.08 0.37

-5 -9 -2 0.52 0.43  
5 9 2 2.07 0.40  
5 9 2 1.25 0.38  
-5 9 -2 0.98 0.39  
6 -9 2 0.82 0.39  
-6 -9 -2 0.52 0.44  
-6 9 -2 0.07 0.36  
6 9 2 0.72 0.32  
6 9 2 1.21 0.39  
-7 -9 -2 0.93 0.52  
7 -9 2 0.75 0.37  
7 -9 2 0.29 0.39  
7 9 2 0.43 0.36  
-7 9 -2 0.17 0.35  
8 -9 2 0.26 0.41  
-8 -9 -2 -0.50 0.49  
8 -9 2 -0.06 0.39  
-8 9 -2 0.26 0.43  
8 9 2 0.33 0.35  
-9 -9 -2 0.48 0.56  
9 -9 2 1.44 0.56  
9 -9 2 1.14 0.50  
-9 9 -2 0.54 0.45  
10 -9 2 -0.17 0.48  
-10 -9 -2 -0.78 0.57  
-10 9 -2 -0.04 0.48  
-11 -9 -2 0.05 0.69  
11 -10 -2 0.00 0.50  
-11 10 2 0.64 0.47  
11 10 -2 0.21 0.50  
10 -10 -2 -0.12 0.51  
-10 10 2 0.50 0.49  
10 10 -2 -0.10 0.45  
-9 -10 2 -0.17 0.51  
9 -10 -2 -0.08 0.46  
-9 10 2 0.23 0.37  
9 10 -2 0.52 0.39  
-8 -10 2 1.19 0.56  
8 -10 -2 0.90 0.47  
8 10 -2 0.29 0.39  
-8 10 2 0.69 0.43  
-7 -10 2 0.14 0.31  
7 -10 -2 -0.18 0.32  
-7 -10 2 0.02 0.48  
7 -10 -2 -0.61 0.39  
-7 10 2 0.02 0.36

|    |     |    |       |      |
|----|-----|----|-------|------|
| 7  | 10  | -2 | -0.17 | 0.35 |
| -6 | -10 | 2  | 2.44  | 0.53 |
| -6 | -10 | 2  | 2.37  | 0.40 |
| 6  | -10 | -2 | 2.47  | 0.47 |
| 6  | -10 | -2 | 2.18  | 0.41 |
| 6  | 10  | -2 | 2.11  | 0.42 |
| -6 | 10  | 2  | 1.76  | 0.41 |
| -6 | 10  | 2  | 2.17  | 0.37 |
| -5 | -10 | 2  | 2.44  | 0.55 |
| 5  | -10 | -2 | 2.83  | 0.55 |
| 5  | -10 | -2 | 2.53  | 0.42 |
| -5 | -10 | 2  | 2.00  | 0.38 |
| -5 | 10  | 2  | 2.89  | 0.38 |
| -5 | 10  | 2  | 2.35  | 0.40 |
| 5  | 10  | -2 | 2.63  | 0.42 |
| 4  | -10 | -2 | 0.41  | 0.35 |
| -4 | -10 | 2  | 0.02  | 0.26 |
| -4 | -10 | 2  | -0.10 | 0.43 |
| -4 | 10  | 2  | -0.39 | 0.34 |
| -4 | 10  | 2  | 0.01  | 0.32 |
| 4  | 10  | -2 | 0.18  | 0.30 |
| -3 | -10 | 2  | 2.66  | 0.54 |
| 3  | -10 | -2 | 3.39  | 0.51 |
| 3  | -10 | -2 | 3.30  | 0.44 |
| -3 | -10 | 2  | 3.76  | 0.43 |
| 3  | -10 | -2 | 3.97  | 0.50 |
| -3 | 10  | 2  | 2.87  | 0.47 |
| -3 | 10  | 2  | 3.43  | 0.42 |
| -3 | 10  | 2  | 3.74  | 0.39 |
| 3  | 10  | -2 | 2.91  | 0.43 |
| -2 | -10 | 2  | 0.34  | 0.42 |
| 2  | -10 | -2 | 0.97  | 0.53 |
| -2 | -10 | 2  | 0.83  | 0.31 |
| 2  | -10 | -2 | 1.46  | 0.43 |
| 2  | -10 | -2 | 0.63  | 0.33 |
| -2 | 10  | 2  | 0.57  | 0.36 |
| -2 | 10  | 2  | 0.39  | 0.33 |
| -2 | 10  | 2  | 0.55  | 0.25 |
| 2  | 10  | -2 | 0.70  | 0.32 |
| -1 | -10 | 2  | 2.73  | 0.52 |
| 1  | -10 | -2 | 3.51  | 0.42 |
| 1  | -10 | -2 | 3.25  | 0.55 |
| -1 | 10  | 2  | 3.51  | 0.34 |
| 1  | 10  | -2 | 1.97  | 0.38 |
| -1 | 10  | 2  | 3.54  | 0.48 |
| 1  | 10  | -2 | 3.30  | 0.40 |



|    |     |    |       |      |
|----|-----|----|-------|------|
| -1 | 10  | 2  | 3.23  | 0.44 |
| 0  | -10 | -2 | 0.84  | 0.43 |
| 0  | -10 | 2  | 0.53  | 0.44 |
| 0  | -10 | -2 | 0.85  | 0.32 |
| 0  | 10  | 2  | 0.53  | 0.33 |
| 0  | 10  | -2 | 1.27  | 0.33 |
| 0  | 10  | -2 | 0.78  | 0.32 |
| -1 | -10 | -2 | 4.34  | 0.57 |
| 1  | -10 | 2  | 3.52  | 0.49 |
| -1 | -10 | -2 | 4.20  | 0.42 |
| -1 | 10  | -2 | 5.14  | 0.45 |
| 1  | 10  | 2  | 4.94  | 0.52 |
| -1 | 10  | -2 | 5.40  | 0.51 |
| 2  | -10 | 2  | 1.08  | 0.39 |
| -2 | -10 | -2 | 2.16  | 0.51 |
| -2 | 10  | -2 | 2.48  | 0.36 |
| 2  | 10  | 2  | 2.22  | 0.44 |
| -2 | 10  | -2 | 1.81  | 0.38 |
| 3  | -10 | 2  | 1.11  | 0.41 |
| -3 | -10 | -2 | -0.02 | 0.42 |
| -3 | 10  | -2 | 0.61  | 0.29 |
| 3  | 10  | 2  | 0.82  | 0.37 |
| -3 | 10  | -2 | 0.89  | 0.35 |
| -4 | -10 | -2 | 1.35  | 0.49 |
| 4  | -10 | 2  | 1.33  | 0.41 |
| -4 | 10  | -2 | 1.23  | 0.39 |
| 4  | 10  | 2  | 1.18  | 0.36 |
| 5  | -10 | 2  | 3.72  | 0.51 |
| -5 | -10 | -2 | 2.94  | 0.56 |
| 5  | 10  | 2  | 2.89  | 0.41 |
| -5 | 10  | -2 | 3.89  | 0.52 |
| 6  | -10 | 2  | 2.67  | 0.48 |
| -6 | -10 | -2 | 2.85  | 0.58 |
| 6  | 10  | 2  | 2.89  | 0.47 |
| -6 | 10  | -2 | 2.74  | 0.51 |
| -7 | -10 | -2 | 0.17  | 0.55 |
| 7  | -10 | 2  | 0.09  | 0.38 |
| 7  | 10  | 2  | 0.42  | 0.33 |
| -7 | 10  | -2 | 0.32  | 0.42 |
| 8  | -10 | 2  | 0.39  | 0.49 |
| -8 | -10 | -2 | -1.07 | 0.54 |
| 8  | -10 | 2  | 1.21  | 0.45 |
| 8  | 10  | 2  | 0.20  | 0.39 |
| -8 | 10  | -2 | 0.56  | 0.44 |
| 9  | -10 | 2  | 0.22  | 0.49 |
| -9 | -10 | -2 | -0.70 | 0.60 |

9 10 2 0.39 0.44  
-9 10 -2 -0.13 0.48  
10 -10 2 0.96 0.66  
-10 -10 -2 -0.21 0.66  
11 -11 -2 0.79 0.91  
10 -11 -2 -0.48 0.50  
-10 11 2 0.19 0.42  
10 11 -2 -0.30 0.40  
-9 -11 2 0.94 0.59  
9 -11 -2 0.90 0.53  
-9 11 2 0.89 0.50  
9 11 -2 0.88 0.46  
8 -11 -2 0.22 0.46  
-8 -11 2 1.09 0.59  
-8 11 2 0.42 0.38  
8 11 -2 0.71 0.46  
7 -11 -2 1.34 0.47  
7 -11 -2 1.41 0.49  
-7 -11 2 1.31 0.51  
7 11 -2 0.76 0.39  
-7 11 2 1.39 0.44  
6 -11 -2 0.42 0.36  
-6 -11 2 0.20 0.50  
6 -11 -2 0.47 0.39  
-6 -11 2 0.07 0.37  
-6 11 2 0.18 0.32  
6 11 -2 0.70 0.36  
-6 11 2 -0.03 0.32  
5 -11 -2 0.84 0.38  
-5 -11 2 1.70 0.49  
-5 -11 2 1.00 0.34  
-5 11 2 1.26 0.37  
5 11 -2 1.17 0.38  
-5 11 2 1.32 0.38  
4 -11 -2 -0.19 0.34  
4 -11 -2 0.81 0.38  
-4 -11 2 -0.17 0.29  
-4 -11 2 -0.21 0.45  
4 11 -2 0.10 0.34  
-4 11 2 0.62 0.36  
3 -11 -2 0.02 0.32  
3 -11 -2 0.75 0.37  
-3 -11 2 0.12 0.40  
-3 -11 2 0.16 0.29  
3 11 -2 0.27 0.32  
-3 11 2 0.51 0.37

-3 11 2 -0.04 0.27  
2 -11 -2 -0.05 0.35  
-2 -11 2 0.76 0.42  
-2 11 2 0.43 0.34  
2 11 -2 0.73 0.34  
2 11 -2 0.35 0.34  
-1 -11 2 1.39 0.48  
1 -11 -2 2.09 0.51  
1 11 -2 1.38 0.37  
-1 11 2 1.98 0.44  
1 11 -2 0.97 0.32  
0 -11 2 3.82 0.57  
0 -11 -2 4.43 0.62  
0 11 2 3.08 0.46  
0 11 -2 4.42 0.48  
0 11 -2 3.91 0.48  
-1 -11 -2 3.78 0.63  
1 -11 2 2.65 0.48  
-1 11 -2 3.18 0.45  
-1 11 -2 2.86 0.44  
1 11 2 3.97 0.51  
2 -11 2 4.15 0.56  
-2 -11 -2 3.56 0.58  
-2 11 -2 3.38 0.43  
-2 11 -2 4.40 0.49  
2 11 2 2.81 0.43  
-3 -11 -2 1.54 0.51  
3 -11 2 0.97 0.39  
-3 11 -2 1.29 0.39  
3 11 2 0.82 0.36  
-3 11 -2 1.10 0.33  
4 -11 2 -0.12 0.32  
-4 -11 -2 0.25 0.52  
4 11 2 0.96 0.39  
-4 11 -2 -0.25 0.28  
5 -11 2 0.86 0.42  
-5 -11 -2 0.69 0.58  
5 11 2 0.80 0.36  
-5 11 -2 0.76 0.39  
-6 -11 -2 0.00 0.55  
6 -11 2 0.10 0.38  
-6 11 -2 0.02 0.38  
6 11 2 -0.62 0.34  
7 -11 2 0.01 0.41  
-7 -11 -2 -0.81 0.47  
-7 11 -2 -0.23 0.42

|     |     |    |       |      |
|-----|-----|----|-------|------|
| 7   | 11  | 2  | -0.09 | 0.40 |
| -8  | -11 | -2 | -0.92 | 0.50 |
| 8   | -11 | 2  | 0.59  | 0.46 |
| 8   | 11  | 2  | 0.31  | 0.42 |
| -8  | 11  | -2 | -0.29 | 0.39 |
| -9  | -11 | -2 | -0.53 | 0.56 |
| 9   | 11  | 2  | -0.39 | 0.42 |
| -9  | 11  | -2 | -0.45 | 0.49 |
| -10 | 12  | 2  | -0.20 | 0.43 |
| -9  | -12 | 2  | -0.09 | 0.58 |
| 9   | 12  | -2 | -0.51 | 0.46 |
| -9  | 12  | 2  | -0.09 | 0.46 |
| -8  | -12 | 2  | 1.09  | 0.62 |
| 8   | 12  | -2 | 0.04  | 0.42 |
| -8  | 12  | 2  | 0.13  | 0.43 |
| -7  | -12 | 2  | -0.03 | 0.55 |
| -7  | 12  | 2  | -0.32 | 0.39 |
| 7   | 12  | -2 | -0.43 | 0.36 |
| 6   | -12 | -2 | 0.09  | 0.36 |
| -6  | -12 | 2  | -0.07 | 0.49 |
| -6  | 12  | 2  | 0.03  | 0.37 |
| 6   | 12  | -2 | 0.18  | 0.38 |
| -5  | -12 | 2  | 0.72  | 0.46 |
| 5   | -12 | -2 | 0.40  | 0.36 |
| -5  | 12  | 2  | 0.43  | 0.37 |
| 5   | 12  | -2 | 0.39  | 0.41 |
| 4   | -12 | -2 | 1.39  | 0.44 |
| -4  | -12 | 2  | 0.91  | 0.46 |
| -4  | -12 | 2  | 1.93  | 0.39 |
| -4  | 12  | 2  | 0.56  | 0.39 |
| 4   | 12  | -2 | 1.04  | 0.43 |
| -3  | -12 | 2  | 0.87  | 0.44 |
| 3   | -12 | -2 | 1.00  | 0.40 |
| -3  | 12  | 2  | -0.17 | 0.36 |
| 3   | 12  | -2 | 0.67  | 0.36 |
| 2   | -12 | -2 | 0.68  | 0.40 |
| -2  | -12 | 2  | 1.32  | 0.50 |
| 2   | 12  | -2 | 1.54  | 0.42 |
| -2  | 12  | 2  | 1.08  | 0.42 |
| -1  | -12 | 2  | 0.16  | 0.40 |
| 1   | -12 | -2 | 0.66  | 0.41 |
| 1   | 12  | -2 | 0.59  | 0.33 |
| -1  | 12  | 2  | 1.36  | 0.41 |
| 1   | 12  | -2 | 0.64  | 0.37 |
| 0   | -12 | 2  | 2.92  | 0.57 |
| 0   | -12 | -2 | 2.32  | 0.51 |

|    |     |    |       |      |
|----|-----|----|-------|------|
| 0  | 12  | -2 | 2.48  | 0.43 |
| 0  | 12  | -2 | 2.14  | 0.42 |
| 0  | 12  | 2  | 3.10  | 0.48 |
| 1  | -12 | 2  | 4.03  | 0.58 |
| -1 | -12 | -2 | 3.93  | 0.64 |
| -1 | 12  | -2 | 3.63  | 0.47 |
| 1  | 12  | 2  | 3.91  | 0.52 |
| -1 | 12  | -2 | 4.99  | 0.54 |
| -2 | -12 | -2 | 1.60  | 0.57 |
| 2  | -12 | 2  | 2.11  | 0.47 |
| 2  | 12  | 2  | 2.12  | 0.43 |
| -2 | 12  | -2 | 1.60  | 0.40 |
| -2 | 12  | -2 | 1.24  | 0.40 |
| 3  | -12 | 2  | -0.03 | 0.34 |
| -3 | -12 | -2 | -0.50 | 0.43 |
| 3  | 12  | 2  | -0.23 | 0.33 |
| -3 | 12  | -2 | 0.58  | 0.37 |
| -4 | -12 | -2 | 0.39  | 0.55 |
| 4  | -12 | 2  | 1.57  | 0.47 |
| 4  | 12  | 2  | 1.22  | 0.44 |
| -4 | 12  | -2 | 0.88  | 0.37 |
| 5  | -12 | 2  | 0.98  | 0.45 |
| -5 | -12 | -2 | 0.93  | 0.63 |
| -5 | 12  | -2 | 0.72  | 0.42 |
| 5  | 12  | 2  | 0.76  | 0.39 |
| -6 | -12 | -2 | 0.53  | 0.57 |
| 6  | -12 | 2  | 0.36  | 0.42 |
| -6 | 12  | -2 | 0.40  | 0.40 |
| 6  | 12  | 2  | 0.47  | 0.39 |
| -7 | -12 | -2 | -0.56 | 0.55 |
| 7  | -12 | 2  | 0.25  | 0.46 |
| 7  | 12  | 2  | -0.33 | 0.42 |
| -7 | 12  | -2 | 0.59  | 0.48 |
| -8 | -12 | -2 | -0.44 | 0.67 |
| 8  | -12 | 2  | 0.02  | 0.47 |
| 8  | 12  | 2  | -0.45 | 0.44 |
| -8 | 12  | -2 | 0.47  | 0.53 |
| 9  | 12  | 2  | 0.00  | 0.50 |
| -9 | -13 | 2  | 0.36  | 0.64 |
| -9 | 13  | 2  | 0.33  | 0.51 |
| -8 | -13 | 2  | 0.25  | 0.60 |
| -8 | 13  | 2  | -0.26 | 0.46 |
| 8  | 13  | -2 | -0.67 | 0.42 |
| -7 | -13 | 2  | 0.19  | 0.52 |
| -7 | 13  | 2  | 0.05  | 0.47 |
| 7  | 13  | -2 | -0.11 | 0.48 |

|    |     |    |       |      |
|----|-----|----|-------|------|
| -6 | -13 | 2  | 0.45  | 0.52 |
| 6  | -13 | -2 | 1.34  | 0.47 |
| 6  | 13  | -2 | 0.51  | 0.44 |
| -5 | -13 | 2  | 2.00  | 0.57 |
| 5  | -13 | -2 | 1.90  | 0.49 |
| 5  | 13  | -2 | 0.84  | 0.47 |
| -5 | 13  | 2  | 1.79  | 0.48 |
| 4  | -13 | -2 | 2.27  | 0.48 |
| -4 | -13 | 2  | 1.20  | 0.57 |
| -4 | 13  | 2  | 0.63  | 0.43 |
| 4  | 13  | -2 | 1.88  | 0.52 |
| -3 | -13 | 2  | 0.46  | 0.45 |
| 3  | -13 | -2 | -0.12 | 0.34 |
| -3 | 13  | 2  | 0.22  | 0.40 |
| 3  | 13  | -2 | 0.01  | 0.37 |
| -2 | -13 | 2  | 0.79  | 0.52 |
| 2  | -13 | -2 | 0.47  | 0.40 |
| 2  | 13  | -2 | -0.26 | 0.35 |
| -2 | 13  | 2  | -0.15 | 0.34 |
| 1  | -13 | -2 | 0.14  | 0.44 |
| -1 | -13 | 2  | 0.34  | 0.49 |
| -1 | 13  | 2  | -0.05 | 0.42 |
| 1  | 13  | -2 | 0.23  | 0.40 |
| 0  | -13 | -2 | 0.33  | 0.49 |
| 0  | -13 | 2  | -0.03 | 0.39 |
| 0  | 13  | -2 | 0.12  | 0.34 |
| 0  | 13  | 2  | 0.24  | 0.39 |
| 0  | 13  | -2 | 0.40  | 0.38 |
| -1 | -13 | -2 | 4.61  | 0.65 |
| 1  | -13 | 2  | 4.64  | 0.63 |
| -1 | 13  | -2 | 3.89  | 0.52 |
| -1 | 13  | -2 | 3.60  | 0.51 |
| 1  | 13  | 2  | 4.16  | 0.56 |
| 2  | -13 | 2  | 0.48  | 0.46 |
| -2 | -13 | -2 | 0.02  | 0.44 |
| -2 | 13  | -2 | 0.36  | 0.36 |
| 2  | 13  | 2  | 0.27  | 0.39 |
| -2 | 13  | -2 | -0.38 | 0.34 |
| -3 | -13 | -2 | -0.14 | 0.57 |
| 3  | -13 | 2  | 0.58  | 0.43 |
| -3 | 13  | -2 | 0.49  | 0.41 |
| 3  | 13  | 2  | 0.18  | 0.42 |
| -4 | -13 | -2 | 0.07  | 0.51 |
| 4  | -13 | 2  | 0.24  | 0.44 |
| -4 | 13  | -2 | 0.15  | 0.42 |
| 4  | 13  | 2  | 0.53  | 0.41 |

|    |     |    |       |      |
|----|-----|----|-------|------|
| -5 | -13 | -2 | -0.32 | 0.62 |
| 5  | -13 | 2  | 0.09  | 0.43 |
| -5 | 13  | -2 | -0.06 | 0.41 |
| 5  | 13  | 2  | 0.18  | 0.38 |
| 6  | -13 | 2  | 0.00  | 0.45 |
| -6 | -13 | -2 | -0.44 | 0.60 |
| 6  | 13  | 2  | 0.35  | 0.41 |
| -6 | 13  | -2 | 0.45  | 0.49 |
| -7 | -13 | -2 | -0.02 | 0.59 |
| 7  | -13 | 2  | -0.03 | 0.43 |
| -7 | 13  | -2 | -0.85 | 0.42 |
| 7  | 13  | 2  | 0.01  | 0.46 |
| -7 | -14 | 2  | 0.45  | 0.61 |
| 7  | 14  | -2 | -0.03 | 0.54 |
| 6  | -14 | -2 | 0.20  | 0.46 |
| -6 | -14 | 2  | 0.35  | 0.53 |
| 6  | 14  | -2 | 0.40  | 0.47 |
| -5 | -14 | 2  | 0.47  | 0.59 |
| 5  | -14 | -2 | 0.43  | 0.46 |
| 5  | 14  | -2 | 0.30  | 0.46 |
| -4 | -14 | 2  | 0.18  | 0.49 |
| 4  | -14 | -2 | 0.06  | 0.45 |
| -4 | 14  | 2  | 0.55  | 0.46 |
| 4  | 14  | -2 | -0.65 | 0.45 |
| -3 | -14 | 2  | 1.43  | 0.55 |
| 3  | -14 | -2 | 1.02  | 0.50 |
| -3 | 14  | 2  | 0.98  | 0.48 |
| 3  | 14  | -2 | 1.34  | 0.53 |
| -2 | -14 | 2  | 0.76  | 0.48 |
| 2  | -14 | -2 | 0.31  | 0.42 |
| -2 | 14  | 2  | 0.37  | 0.45 |
| 2  | 14  | -2 | 1.15  | 0.52 |
| 1  | -14 | -2 | 0.17  | 0.50 |
| -1 | -14 | 2  | -0.34 | 0.49 |
| 1  | 14  | -2 | -0.22 | 0.37 |
| -1 | 14  | 2  | -0.07 | 0.44 |
| 0  | -14 | -2 | 0.82  | 0.52 |
| 0  | -14 | 2  | 0.66  | 0.46 |
| 0  | 14  | -2 | 0.03  | 0.43 |
| 0  | 14  | 2  | 0.76  | 0.49 |
| -1 | -14 | -2 | 0.68  | 0.55 |
| 1  | -14 | 2  | 0.30  | 0.50 |
| -1 | 14  | -2 | -0.15 | 0.39 |
| -1 | 14  | -2 | -0.23 | 0.36 |
| 1  | 14  | 2  | 0.49  | 0.50 |
| -2 | -14 | -2 | -0.20 | 0.52 |

|    |     |    |       |      |
|----|-----|----|-------|------|
| 2  | -14 | 2  | 0.12  | 0.41 |
| -2 | 14  | -2 | 0.58  | 0.42 |
| 2  | 14  | 2  | 0.24  | 0.48 |
| -2 | 14  | -2 | 0.16  | 0.40 |
| 3  | -14 | 2  | 0.89  | 0.46 |
| -3 | -14 | -2 | 0.90  | 0.63 |
| 3  | 14  | 2  | 1.60  | 0.54 |
| -3 | 14  | -2 | 0.62  | 0.44 |
| 4  | -14 | 2  | 0.60  | 0.49 |
| -4 | -14 | -2 | -0.60 | 0.59 |
| 4  | 14  | 2  | -0.26 | 0.42 |
| -4 | 14  | -2 | 0.60  | 0.44 |
| -5 | -14 | -2 | -0.81 | 0.52 |
| 5  | -14 | 2  | 0.88  | 0.47 |
| 5  | 14  | 2  | 0.03  | 0.41 |
| -5 | 14  | -2 | -0.11 | 0.45 |
| 6  | -14 | 2  | 0.26  | 0.46 |
| -6 | -14 | -2 | -0.02 | 1.02 |
| -6 | 14  | -2 | 0.13  | 0.46 |
| 6  | 14  | 2  | 0.86  | 0.53 |
| 5  | -15 | -2 | 0.69  | 0.50 |
| -5 | -15 | 2  | 0.79  | 0.64 |
| 5  | 15  | -2 | 0.09  | 0.47 |
| 4  | -15 | -2 | 0.98  | 0.52 |
| -4 | -15 | 2  | 0.54  | 0.59 |
| -4 | 15  | 2  | 0.60  | 0.50 |
| 4  | 15  | -2 | 0.67  | 0.47 |
| 3  | -15 | -2 | 0.60  | 0.47 |
| -3 | -15 | 2  | -0.08 | 0.56 |
| 3  | 15  | -2 | -0.14 | 0.45 |
| -3 | 15  | 2  | -0.23 | 0.48 |
| -2 | -15 | 2  | 0.25  | 0.49 |
| 2  | -15 | -2 | 0.07  | 0.44 |
| -2 | 15  | 2  | -0.09 | 0.43 |
| 2  | 15  | -2 | -0.81 | 0.40 |
| 1  | -15 | -2 | 0.35  | 0.47 |
| -1 | -15 | 2  | 0.09  | 0.48 |
| -1 | 15  | 2  | 0.05  | 0.49 |
| 1  | 15  | -2 | 0.39  | 0.49 |
| 0  | -15 | -2 | 0.46  | 0.56 |
| 0  | -15 | 2  | 0.80  | 0.50 |
| 0  | 15  | 2  | 0.42  | 0.47 |
| 0  | 15  | -2 | 0.56  | 0.49 |
| -1 | -15 | -2 | 0.79  | 0.55 |
| 1  | -15 | 2  | -0.51 | 0.46 |
| -1 | 15  | -2 | -0.47 | 0.45 |



|     |     |    |       |      |
|-----|-----|----|-------|------|
| 1   | 15  | 2  | 0.55  | 0.47 |
| 2   | -15 | 2  | 0.68  | 0.47 |
| -2  | -15 | -2 | 1.69  | 0.67 |
| 2   | 15  | 2  | 1.63  | 0.59 |
| 3   | -15 | 2  | 0.13  | 0.51 |
| -3  | -15 | -2 | 0.83  | 0.63 |
| -3  | 15  | -2 | -0.39 | 0.49 |
| 3   | 15  | 2  | -0.34 | 0.50 |
| -4  | -15 | -2 | 0.11  | 0.97 |
| 4   | -15 | 2  | 0.26  | 0.51 |
| 4   | 15  | 2  | 0.36  | 0.55 |
| -4  | 15  | -2 | 0.10  | 0.46 |
| -5  | 15  | -2 | -0.15 | 0.46 |
| 4   | -16 | -2 | 0.35  | 0.51 |
| 3   | -16 | -2 | 1.88  | 0.59 |
| -3  | 16  | 2  | 0.42  | 0.54 |
| 2   | -16 | -2 | 1.27  | 0.57 |
| 2   | 16  | -2 | -0.56 | 0.52 |
| -2  | 16  | 2  | 0.74  | 0.53 |
| -1  | -16 | 2  | 1.88  | 0.98 |
| 1   | -16 | -2 | 0.41  | 0.58 |
| 1   | 16  | -2 | 0.36  | 0.53 |
| -1  | 16  | 2  | 0.45  | 0.48 |
| 0   | -16 | 2  | 0.85  | 0.57 |
| 0   | -16 | -2 | 0.61  | 0.58 |
| 0   | 16  | -2 | 1.67  | 0.58 |
| 0   | 16  | 2  | 1.55  | 0.60 |
| -1  | 16  | -2 | 0.62  | 0.53 |
| 14  | 0   | -3 | 0.11  | 0.51 |
| -14 | 0   | 3  | 0.37  | 0.50 |
| -13 | 0   | 3  | 0.10  | 0.44 |
| 13  | 0   | -3 | -0.03 | 0.48 |
| 12  | 0   | -3 | -0.61 | 0.39 |
| -12 | 0   | 3  | -0.02 | 0.34 |
| 11  | 0   | -3 | 0.53  | 0.40 |
| -11 | 0   | 3  | 0.50  | 0.38 |
| 10  | 0   | -3 | 0.58  | 0.27 |
| -10 | 0   | 3  | 0.17  | 0.30 |
| 10  | 0   | -3 | 0.14  | 0.33 |
| 9   | 0   | -3 | 0.15  | 0.35 |
| 9   | 0   | -3 | 0.18  | 0.24 |
| -9  | 0   | 3  | 1.05  | 0.33 |
| 8   | 0   | -3 | 2.64  | 0.40 |
| -8  | 0   | 3  | 1.50  | 0.37 |
| 8   | 0   | -3 | 1.42  | 0.40 |
| -8  | 0   | 3  | 1.62  | 0.44 |

-7 0 3 1.26 0.18  
-7 0 3 0.99 0.29  
-7 0 3 1.06 0.37  
7 0 -3 0.71 0.34  
7 0 -3 1.27 0.32  
6 0 -3 0.33 0.28  
-6 0 3 0.58 0.13  
-6 0 3 0.49 0.30  
-6 0 3 0.46 0.22  
6 0 -3 0.25 0.27  
5 0 -3 -0.12 0.21  
-5 0 3 0.00 0.18  
-5 0 3 0.06 0.24  
-5 0 3 0.22 0.10  
5 0 -3 -0.13 0.21  
-5 0 3 0.17 0.16  
-4 0 3 69.66 1.80  
-4 0 3 67.53 1.57  
-4 0 3 70.76 1.47  
4 0 -3 72.32 1.78  
4 0 -3 71.91 1.62  
-3 0 3 5.18 0.41  
3 0 -3 5.77 0.40  
-3 0 3 5.18 0.32  
3 0 -3 5.05 0.35  
-3 0 3 5.27 0.27  
2 0 -3 75.05 1.68  
2 0 -3 73.97 1.82  
-2 0 3 78.11 1.83  
-2 0 3 76.48 1.63  
-2 0 3 78.35 1.55  
-2 0 3 78.90 1.57  
1 0 -3 175.90 3.92  
-1 0 3 179.39 3.38  
-1 0 3 174.92 3.65  
-1 0 3 182.70 3.93  
0 0 -3 0.75 0.19  
0 0 3 0.84 0.17  
0 0 3 0.42 0.18  
0 0 3 0.44 0.17  
1 0 3 1.40 0.23  
1 0 3 2.11 0.22  
1 0 3 2.31 0.16  
-1 0 -3 2.50 0.28  
1 0 3 2.25 0.23  
-1 0 -3 2.16 0.19

-2 0 -3 67.59 1.71  
2 0 3 68.18 1.32  
2 0 3 68.30 1.71  
2 0 3 67.59 1.54  
2 0 3 68.35 1.57  
-2 0 -3 67.16 1.48  
3 0 3 -0.08 0.20  
3 0 3 0.06 0.19  
-3 0 -3 0.22 0.15  
-3 0 -3 0.18 0.23  
3 0 3 -0.07 0.19  
3 0 3 0.12 0.08  
-4 0 -3 81.13 2.11  
4 0 3 79.31 1.84  
4 0 3 81.00 2.11  
-4 0 -3 80.00 1.88  
4 0 3 80.80 1.55  
4 0 3 79.43 1.91  
-4 0 -3 81.28 1.82  
-5 0 -3 0.44 0.23  
-5 0 -3 1.19 0.35  
5 0 3 0.84 0.35  
5 0 3 0.56 0.33  
5 0 3 0.59 0.11  
-5 0 -3 0.16 0.22  
5 0 3 0.59 0.32  
-6 0 -3 8.09 0.48  
6 0 3 8.47 0.57  
6 0 3 10.04 0.64  
-6 0 -3 8.73 0.51  
7 0 3 11.79 0.70  
-7 0 -3 10.59 0.59  
-7 0 -3 10.57 0.61  
-8 0 -3 0.53 0.32  
8 0 3 -0.01 0.36  
-8 0 -3 0.49 0.32  
-9 0 -3 0.26 0.34  
-9 0 -3 0.83 0.35  
9 0 3 0.82 0.40  
-10 0 -3 -0.53 0.33  
10 0 3 0.16 0.40  
-10 0 -3 -0.04 0.37  
11 0 3 0.97 0.48  
-11 0 -3 0.90 0.44  
-12 0 -3 -0.19 0.41  
12 0 3 0.66 0.52

-14 -1 3 0.69 0.53  
14 -1 -3 -0.15 0.51  
14 1 -3 0.19 0.48  
-14 1 3 0.04 0.48  
13 -1 -3 0.54 0.50  
-13 -1 3 0.09 0.40  
-13 1 3 -0.12 0.44  
13 1 -3 0.32 0.48  
-12 -1 3 1.71 0.48  
12 -1 -3 2.27 0.54  
-12 1 3 2.23 0.49  
12 1 -3 2.22 0.52  
-11 -1 3 2.78 0.45  
11 -1 -3 2.77 0.54  
11 1 -3 3.00 0.51  
-11 1 3 1.97 0.41  
10 -1 -3 5.94 0.59  
-10 -1 3 5.38 0.52  
-10 1 3 5.08 0.53  
10 1 -3 6.12 0.47  
10 1 -3 4.37 0.50  
9 -1 -3 3.09 0.50  
-9 -1 3 3.81 0.47  
9 -1 -3 3.34 0.34  
9 1 -3 2.63 0.44  
-9 1 3 3.10 0.44  
9 1 -3 4.66 0.47  
8 -1 -3 0.84 0.26  
8 -1 -3 0.47 0.39  
-8 -1 3 0.69 0.39  
-8 -1 3 0.71 0.34  
-8 -1 3 1.23 0.24  
8 1 -3 0.52 0.32  
-8 1 3 0.62 0.30  
8 1 -3 0.24 0.38  
-7 -1 3 3.56 0.28  
7 -1 -3 3.19 0.45  
7 -1 -3 2.88 0.43  
-7 -1 3 3.05 0.37  
-7 -1 3 3.62 0.48  
7 1 -3 2.84 0.42  
-7 1 3 3.66 0.31  
-7 1 3 3.58 0.50  
7 1 -3 3.49 0.41  
7 1 -3 4.21 0.35  
-7 1 3 3.45 0.40

-7 1 3 3.63 0.23  
-6 -1 3 10.59 0.63  
-6 -1 3 12.05 0.40  
-6 -1 3 12.41 0.54  
6 -1 -3 11.49 0.58  
-6 1 3 11.83 0.52  
-6 1 3 11.43 0.33  
-6 1 3 11.68 0.44  
-6 1 3 10.52 0.68  
6 1 -3 11.89 0.55  
6 1 -3 11.14 0.61  
6 1 -3 11.83 0.46  
5 -1 -3 7.05 0.44  
-5 -1 3 6.34 0.46  
-5 -1 3 5.48 0.36  
5 -1 -3 6.63 0.49  
-5 -1 3 6.39 0.28  
-5 1 3 5.87 0.36  
5 1 -3 6.38 0.38  
5 1 -3 7.17 0.45  
5 1 -3 6.51 0.33  
-5 1 3 6.25 0.19  
-5 1 3 7.61 0.54  
-5 1 3 6.40 0.32  
-4 -1 3 46.58 1.02  
-4 -1 3 46.90 1.28  
4 -1 -3 46.71 1.31  
4 -1 -3 46.68 1.18  
-4 -1 3 47.17 1.14  
-4 1 3 46.38 1.12  
4 1 -3 47.50 1.24  
4 1 -3 46.59 1.12  
4 1 -3 47.13 1.07  
-4 1 3 48.01 1.05  
-4 1 3 47.72 1.34  
3 -1 -3 6.10 0.39  
-3 -1 3 5.63 0.28  
-3 -1 3 5.10 0.31  
3 -1 -3 6.11 0.45  
-3 -1 3 6.59 0.41  
-3 -1 3 5.60 0.23  
-3 1 3 6.04 0.28  
-3 1 3 6.78 0.46  
3 1 -3 5.77 0.33  
-3 1 3 6.23 0.29  
3 1 -3 5.08 0.38

|    |    |    |       |      |
|----|----|----|-------|------|
| -2 | -1 | 3  | 45.31 | 0.96 |
| -2 | -1 | 3  | 44.96 | 0.96 |
| -2 | -1 | 3  | 43.83 | 1.11 |
| -2 | -1 | 3  | 43.31 | 1.02 |
| 2  | -1 | -3 | 44.65 | 0.94 |
| 2  | -1 | -3 | 44.34 | 1.19 |
| 2  | -1 | -3 | 44.10 | 1.08 |
| 2  | 1  | -3 | 44.86 | 1.12 |
| -2 | 1  | 3  | 44.00 | 0.96 |
| 2  | 1  | -3 | 44.10 | 1.01 |
| -2 | 1  | 3  | 45.45 | 1.19 |
| -1 | -1 | 3  | 11.62 | 0.39 |
| 1  | -1 | -3 | 11.98 | 0.34 |
| -1 | -1 | 3  | 10.90 | 0.32 |
| 1  | -1 | -3 | 11.31 | 0.46 |
| -1 | 1  | 3  | 10.95 | 0.40 |
| -1 | 1  | 3  | 10.27 | 0.47 |
| 1  | 1  | -3 | 12.04 | 0.42 |
| -1 | 1  | 3  | 10.70 | 0.34 |
| -1 | 1  | 3  | 11.40 | 0.32 |
| 0  | -1 | 3  | 60.83 | 1.35 |
| 0  | -1 | 3  | 62.71 | 1.21 |
| 0  | -1 | -3 | 60.34 | 1.50 |
| 0  | -1 | 3  | 59.29 | 1.33 |
| 0  | 1  | -3 | 60.37 | 1.46 |
| 0  | 1  | 3  | 62.24 | 1.32 |
| 0  | 1  | 3  | 61.35 | 1.25 |
| 0  | 1  | 3  | 60.67 | 1.38 |
| 0  | 1  | 3  | 63.82 | 1.26 |
| -1 | -1 | -3 | 18.07 | 0.44 |
| -1 | -1 | -3 | 17.36 | 0.63 |
| -1 | -1 | -3 | 17.36 | 0.54 |
| 1  | -1 | 3  | 17.89 | 0.54 |
| 1  | -1 | 3  | 18.22 | 0.40 |
| 1  | -1 | 3  | 17.11 | 0.60 |
| 1  | -1 | 3  | 16.23 | 0.53 |
| 1  | 1  | 3  | 17.68 | 0.57 |
| -1 | 1  | -3 | 16.92 | 0.60 |
| 1  | 1  | 3  | 17.06 | 0.44 |
| 1  | 1  | 3  | 17.40 | 0.55 |
| -1 | 1  | -3 | 18.07 | 0.52 |
| -2 | -1 | -3 | 56.33 | 1.21 |
| -2 | -1 | -3 | 54.13 | 1.46 |
| 2  | -1 | 3  | 54.82 | 1.30 |
| 2  | -1 | 3  | 55.27 | 1.45 |
| 2  | -1 | 3  | 56.23 | 1.06 |

-2 -1 -3 53.80 1.30  
2 -1 3 56.37 1.32  
2 1 3 54.88 1.47  
2 1 3 54.88 1.33  
-2 1 -3 57.45 1.46  
2 1 3 56.97 1.31  
2 1 3 55.57 1.13  
-3 -1 -3 5.12 0.33  
-3 -1 -3 5.17 0.44  
3 -1 3 4.97 0.37  
3 -1 3 4.71 0.40  
-3 -1 -3 5.86 0.30  
3 -1 3 4.80 0.34  
-3 1 -3 4.89 0.42  
3 1 3 5.65 0.40  
3 1 3 4.28 0.39  
-3 1 -3 5.47 0.34  
3 1 3 4.92 0.23  
3 1 3 5.76 0.40  
4 -1 3 22.05 0.77  
4 -1 3 22.85 0.88  
-4 -1 -3 22.00 0.74  
-4 -1 -3 22.83 0.67  
-4 -1 -3 22.69 0.89  
4 -1 3 22.94 0.73  
4 1 3 22.14 0.78  
4 1 3 22.54 0.76  
4 1 3 23.34 0.88  
4 1 3 22.19 0.55  
-4 1 -3 23.71 0.89  
-4 1 -3 21.86 0.71  
-5 -1 -3 18.77 0.89  
-5 -1 -3 17.69 0.63  
5 -1 3 18.19 0.71  
-5 -1 -3 16.92 0.69  
5 -1 3 18.22 0.85  
5 -1 3 18.14 0.72  
5 1 3 18.61 0.77  
5 1 3 18.32 0.48  
5 1 3 18.15 0.84  
-5 1 -3 18.95 0.70  
-5 1 -3 17.09 0.82  
-6 -1 -3 17.54 0.71  
6 -1 3 16.40 0.74  
-6 -1 -3 17.41 0.67  
6 -1 3 16.87 0.73

|     |    |    |       |      |
|-----|----|----|-------|------|
| 6   | 1  | 3  | 17.32 | 0.79 |
| -6  | 1  | -3 | 17.42 | 0.73 |
| -6  | 1  | -3 | 17.87 | 0.73 |
| 7   | -1 | 3  | 1.85  | 0.40 |
| -7  | -1 | -3 | 2.47  | 0.36 |
| 7   | -1 | 3  | 1.39  | 0.38 |
| -7  | -1 | -3 | 2.41  | 0.36 |
| -7  | 1  | -3 | 2.39  | 0.38 |
| -7  | 1  | -3 | 2.38  | 0.37 |
| 7   | 1  | 3  | 2.27  | 0.45 |
| -8  | -1 | -3 | 4.42  | 0.48 |
| 8   | -1 | 3  | 3.44  | 0.51 |
| -8  | -1 | -3 | 3.91  | 0.44 |
| 8   | -1 | 3  | 4.08  | 0.54 |
| -8  | 1  | -3 | 3.62  | 0.45 |
| -8  | 1  | -3 | 3.05  | 0.43 |
| 8   | 1  | 3  | 4.09  | 0.52 |
| -9  | -1 | -3 | 1.25  | 0.37 |
| 9   | -1 | 3  | 0.01  | 0.38 |
| -9  | -1 | -3 | 0.55  | 0.33 |
| -9  | 1  | -3 | 0.63  | 0.36 |
| -9  | 1  | -3 | 0.35  | 0.34 |
| 9   | 1  | 3  | 0.48  | 0.39 |
| 10  | -1 | 3  | -0.01 | 0.41 |
| -10 | -1 | -3 | 0.60  | 0.42 |
| -10 | -1 | -3 | 0.07  | 0.34 |
| 10  | 1  | 3  | 0.34  | 0.37 |
| -10 | 1  | -3 | -0.28 | 0.34 |
| -10 | 1  | -3 | -0.07 | 0.37 |
| 11  | -1 | 3  | 0.26  | 0.47 |
| -11 | -1 | -3 | 0.16  | 0.40 |
| -11 | 1  | -3 | 0.19  | 0.42 |
| 11  | 1  | 3  | 0.33  | 0.45 |
| 12  | -1 | 3  | 0.27  | 0.49 |
| -12 | -1 | -3 | -0.03 | 0.43 |
| -12 | 1  | -3 | -0.58 | 0.41 |
| 12  | 1  | 3  | -0.04 | 0.49 |
| -14 | -2 | 3  | -0.08 | 0.42 |
| 14  | -2 | -3 | 1.27  | 1.00 |
| -14 | 2  | 3  | -0.63 | 0.72 |
| 14  | 2  | -3 | 0.45  | 0.52 |
| -13 | -2 | 3  | 0.78  | 0.47 |
| 13  | -2 | -3 | 0.48  | 0.49 |
| -13 | 2  | 3  | 0.60  | 0.43 |
| 13  | 2  | -3 | 1.09  | 0.49 |
| 12  | -2 | -3 | -0.34 | 0.40 |



-12 -2 3 0.53 0.42  
-12 2 3 0.16 0.35  
12 2 -3 0.51 0.44  
11 -2 -3 0.87 0.44  
-11 -2 3 0.45 0.36  
11 2 -3 1.17 0.42  
-11 2 3 1.41 0.42  
-10 -2 3 0.71 0.37  
10 -2 -3 1.03 0.44  
10 2 -3 0.62 0.39  
-10 2 3 0.85 0.34  
10 2 -3 0.54 0.32  
-9 -2 3 4.39 0.47  
9 -2 -3 4.85 0.52  
9 -2 -3 5.08 0.38  
9 2 -3 5.88 0.55  
-9 2 3 4.87 0.47  
-8 -2 3 1.01 0.27  
-8 -2 3 0.49 0.37  
-8 -2 3 1.38 0.34  
8 -2 -3 1.01 0.41  
-8 2 3 1.08 0.23  
8 2 -3 1.55 0.39  
-8 2 3 1.01 0.32  
8 2 -3 1.19 0.29  
8 2 -3 0.90 0.35  
-7 -2 3 4.04 0.41  
7 -2 -3 4.87 0.46  
-7 -2 3 4.01 0.33  
-7 -2 3 4.60 0.49  
7 -2 -3 3.35 0.46  
7 -2 -3 4.29 0.26  
-7 2 3 4.17 0.32  
7 2 -3 4.52 0.36  
-7 2 3 3.59 0.37  
7 2 -3 2.77 0.41  
7 2 -3 4.29 0.42  
-7 2 3 3.93 0.24  
-7 2 3 4.86 0.56  
6 -2 -3 0.31 0.30  
6 -2 -3 0.71 0.13  
-6 -2 3 0.40 0.24  
-6 -2 3 0.74 0.28  
-6 -2 3 0.64 0.22  
6 -2 -3 -0.06 0.29  
6 2 -3 0.81 0.25

6 2 -3 0.39 0.27  
6 2 -3 0.45 0.21  
-6 2 3 0.51 0.32  
-6 2 3 0.72 0.24  
-6 2 3 0.62 0.19  
5 -2 -3 36.11 0.78  
-5 -2 3 33.29 0.96  
5 -2 -3 36.56 1.16  
5 -2 -3 37.70 1.04  
-5 -2 3 34.66 0.88  
-5 -2 3 35.19 1.08  
-5 2 3 36.88 1.19  
5 2 -3 35.98 0.94  
5 2 -3 37.12 1.06  
-5 2 3 35.15 0.95  
5 2 -3 37.17 0.91  
-5 2 3 37.43 0.87  
-4 -2 3 6.69 0.41  
-4 -2 3 6.92 0.37  
4 -2 -3 6.92 0.50  
4 -2 -3 6.26 0.43  
-4 -2 3 6.99 0.32  
4 -2 -3 7.16 0.22  
-4 2 3 7.35 0.34  
4 2 -3 7.25 0.34  
-4 2 3 7.14 0.32  
4 2 -3 7.22 0.38  
4 2 -3 7.25 0.33  
-4 2 3 7.17 0.48  
-3 -2 3 96.96 2.14  
-3 -2 3 99.69 2.10  
3 -2 -3 99.33 2.05  
3 -2 -3 105.49 2.44  
-3 -2 3 100.51 2.29  
3 -2 -3 96.90 2.22  
3 2 -3 100.08 2.27  
-3 2 3 103.39 2.44  
-3 2 3 99.52 2.01  
3 2 -3 102.17 2.04  
3 2 -3 98.99 2.11  
-3 2 3 99.35 2.10  
2 -2 -3 18.61 0.47  
-2 -2 3 16.83 0.52  
2 -2 -3 17.71 0.60  
2 -2 -3 17.19 0.67  
-2 -2 3 18.36 0.55

|    |    |    |        |      |
|----|----|----|--------|------|
| 2  | 2  | -3 | 17.53  | 0.47 |
| 2  | 2  | -3 | 17.06  | 0.53 |
| -2 | 2  | 3  | 18.22  | 0.47 |
| 2  | 2  | -3 | 18.31  | 0.50 |
| -2 | 2  | 3  | 18.03  | 0.51 |
| -2 | 2  | 3  | 16.46  | 0.66 |
| 1  | -2 | -3 | 131.01 | 2.96 |
| -1 | -2 | 3  | 124.09 | 2.66 |
| -1 | -2 | 3  | 127.28 | 2.62 |
| 1  | -2 | -3 | 126.35 | 2.65 |
| -1 | -2 | 3  | 128.91 | 2.66 |
| 1  | 2  | -3 | 129.18 | 2.81 |
| 1  | 2  | -3 | 127.71 | 2.49 |
| -1 | 2  | 3  | 126.63 | 2.71 |
| -1 | 2  | 3  | 130.70 | 2.95 |
| -1 | 2  | 3  | 129.02 | 2.51 |
| -1 | 2  | 3  | 128.90 | 2.55 |
| 1  | 2  | -3 | 128.75 | 2.80 |
| 0  | -2 | 3  | 52.55  | 1.18 |
| 0  | -2 | 3  | 49.42  | 1.17 |
| 0  | -2 | 3  | 49.47  | 1.22 |
| 0  | -2 | -3 | 52.52  | 1.33 |
| 0  | -2 | -3 | 51.77  | 1.17 |
| 0  | -2 | -3 | 53.58  | 1.02 |
| 0  | -2 | -3 | 48.08  | 1.31 |
| 0  | -2 | 3  | 50.05  | 1.13 |
| 0  | 2  | 3  | 50.40  | 1.08 |
| 0  | 2  | -3 | 50.40  | 1.04 |
| 0  | 2  | 3  | 51.78  | 1.20 |
| 0  | 2  | -3 | 50.75  | 1.22 |
| -1 | -2 | -3 | 0.16   | 0.17 |
| 1  | -2 | 3  | -0.20  | 0.19 |
| -1 | -2 | -3 | 0.16   | 0.08 |
| -1 | -2 | -3 | 0.27   | 0.22 |
| -1 | 2  | -3 | -0.02  | 0.08 |
| -1 | 2  | -3 | -0.08  | 0.14 |
| 1  | 2  | 3  | -0.15  | 0.20 |
| -1 | 2  | -3 | 0.00   | 0.18 |
| 1  | 2  | 3  | -0.09  | 0.19 |
| -2 | -2 | -3 | 19.91  | 0.62 |
| 2  | -2 | 3  | 20.13  | 0.70 |
| -2 | -2 | -3 | 20.06  | 0.50 |
| 2  | -2 | 3  | 19.85  | 0.61 |
| 2  | -2 | 3  | 19.86  | 0.63 |
| -2 | -2 | -3 | 19.30  | 0.71 |
| 2  | 2  | 3  | 21.15  | 0.74 |

|    |    |    |       |      |
|----|----|----|-------|------|
| 2  | 2  | 3  | 20.32 | 0.52 |
| -2 | 2  | -3 | 19.86 | 0.41 |
| -2 | 2  | -3 | 20.19 | 0.69 |
| 2  | 2  | 3  | 20.66 | 0.65 |
| -2 | 2  | -3 | 20.48 | 0.63 |
| 3  | -2 | 3  | 6.44  | 0.41 |
| -3 | -2 | -3 | 6.69  | 0.37 |
| 3  | -2 | 3  | 6.44  | 0.46 |
| 3  | -2 | 3  | 6.86  | 0.39 |
| -3 | -2 | -3 | 7.13  | 0.30 |
| -3 | -2 | -3 | 6.70  | 0.49 |
| 3  | 2  | 3  | 7.35  | 0.44 |
| 3  | 2  | 3  | 6.09  | 0.47 |
| -3 | 2  | -3 | 6.93  | 0.39 |
| -3 | 2  | -3 | 6.51  | 0.46 |
| 3  | 2  | 3  | 6.52  | 0.28 |
| 4  | -2 | 3  | 2.29  | 0.32 |
| 4  | -2 | 3  | 3.38  | 0.38 |
| -4 | -2 | -3 | 2.40  | 0.30 |
| -4 | -2 | -3 | 2.32  | 0.37 |
| 4  | -2 | 3  | 2.66  | 0.38 |
| -4 | -2 | -3 | 2.97  | 0.26 |
| 4  | 2  | 3  | 2.41  | 0.36 |
| 4  | 2  | 3  | 2.94  | 0.23 |
| 4  | 2  | 3  | 2.19  | 0.31 |
| -4 | 2  | -3 | 2.56  | 0.36 |
| -4 | 2  | -3 | 2.16  | 0.29 |
| 5  | -2 | 3  | 29.00 | 0.92 |
| -5 | -2 | -3 | 27.66 | 1.07 |
| -5 | -2 | -3 | 28.50 | 0.92 |
| -5 | -2 | -3 | 28.51 | 0.81 |
| 5  | -2 | 3  | 27.40 | 0.95 |
| 5  | -2 | 3  | 27.38 | 1.07 |
| 5  | 2  | 3  | 28.79 | 0.72 |
| -5 | 2  | -3 | 29.08 | 1.08 |
| 5  | 2  | 3  | 26.70 | 1.06 |
| 5  | 2  | 3  | 27.19 | 0.93 |
| -5 | 2  | -3 | 29.65 | 0.92 |
| -6 | -2 | -3 | 7.85  | 0.47 |
| 6  | -2 | 3  | 8.18  | 0.56 |
| -6 | -2 | -3 | 7.56  | 0.54 |
| 6  | -2 | 3  | 8.27  | 0.61 |
| 6  | 2  | 3  | 9.36  | 0.63 |
| 6  | 2  | 3  | 8.52  | 0.38 |
| -6 | 2  | -3 | 8.11  | 0.57 |
| -7 | -2 | -3 | 15.16 | 0.67 |

-7 -2 -3 15.42 0.72  
7 -2 3 15.59 0.80  
7 2 3 15.25 0.78  
-7 2 -3 14.18 0.72  
-8 -2 -3 -0.02 0.27  
-8 -2 -3 0.46 0.35  
8 -2 3 0.11 0.37  
8 -2 3 0.39 0.40  
8 2 3 0.14 0.36  
-8 2 -3 0.09 0.28  
-8 2 -3 -0.23 0.31  
9 -2 3 0.56 0.40  
-9 -2 -3 -0.15 0.29  
-9 -2 -3 0.03 0.34  
9 -2 3 -0.21 0.39  
9 2 3 -0.31 0.36  
-9 2 -3 0.24 0.33  
-9 2 -3 0.43 0.32  
-10 -2 -3 -0.24 0.32  
-10 -2 -3 0.04 0.38  
10 -2 3 0.62 0.45  
-10 2 -3 0.06 0.35  
10 2 3 -0.02 0.40  
-10 2 -3 0.16 0.38  
-11 -2 -3 0.24 0.40  
11 -2 3 0.26 0.49  
-11 -2 -3 0.27 0.65  
-11 2 -3 0.24 0.43  
11 2 3 0.76 0.48  
12 -2 3 0.45 0.49  
-12 2 -3 -0.05 0.47  
12 2 3 0.04 0.48  
-14 -3 3 0.06 0.48  
14 3 -3 0.09 0.50  
13 -3 -3 0.16 0.47  
-13 -3 3 -0.27 0.43  
13 3 -3 -0.10 0.44  
-13 3 3 0.67 0.49  
-12 -3 3 0.62 0.40  
12 -3 -3 0.87 0.47  
12 3 -3 0.62 0.44  
-12 3 3 0.61 0.44  
11 -3 -3 1.15 0.41  
-11 -3 3 1.86 0.46  
-11 3 3 1.57 0.39  
11 3 -3 2.48 0.48

|     |    |    |       |      |
|-----|----|----|-------|------|
| 10  | -3 | -3 | 1.96  | 0.43 |
| -10 | -3 | 3  | 1.53  | 0.39 |
| -10 | 3  | 3  | 2.22  | 0.43 |
| 10  | 3  | -3 | 2.26  | 0.44 |
| -9  | -3 | 3  | 2.75  | 0.41 |
| 9   | -3 | -3 | 4.18  | 0.54 |
| -9  | 3  | 3  | 3.45  | 0.32 |
| 9   | 3  | -3 | 2.69  | 0.36 |
| 9   | 3  | -3 | 3.17  | 0.45 |
| -9  | 3  | 3  | 3.30  | 0.45 |
| 8   | -3 | -3 | 12.93 | 0.76 |
| -8  | -3 | 3  | 12.57 | 0.59 |
| -8  | -3 | 3  | 10.99 | 0.75 |
| -8  | -3 | 3  | 12.73 | 0.70 |
| 8   | 3  | -3 | 11.98 | 0.55 |
| -8  | 3  | 3  | 13.28 | 0.52 |
| -8  | 3  | 3  | 11.47 | 0.66 |
| 8   | 3  | -3 | 11.37 | 0.70 |
| 8   | 3  | -3 | 11.21 | 0.63 |
| -7  | -3 | 3  | 3.12  | 0.44 |
| 7   | -3 | -3 | 3.20  | 0.42 |
| -7  | -3 | 3  | 3.90  | 0.41 |
| 7   | -3 | -3 | 3.79  | 0.25 |
| -7  | -3 | 3  | 3.73  | 0.38 |
| 7   | -3 | -3 | 3.25  | 0.78 |
| 7   | 3  | -3 | 4.18  | 0.45 |
| -7  | 3  | 3  | 2.92  | 0.28 |
| -7  | 3  | 3  | 3.23  | 0.51 |
| 7   | 3  | -3 | 4.38  | 0.39 |
| -7  | 3  | 3  | 3.56  | 0.38 |
| 7   | 3  | -3 | 3.40  | 0.38 |
| 6   | -3 | -3 | 31.43 | 1.03 |
| -6  | -3 | 3  | 32.53 | 1.06 |
| 6   | -3 | -3 | 33.19 | 1.17 |
| 6   | -3 | -3 | 32.65 | 0.78 |
| -6  | -3 | 3  | 31.32 | 0.98 |
| -6  | -3 | 3  | 30.63 | 0.90 |
| 6   | 3  | -3 | 31.77 | 0.92 |
| -6  | 3  | 3  | 34.13 | 0.96 |
| 6   | 3  | -3 | 33.40 | 0.90 |
| -6  | 3  | 3  | 32.76 | 0.84 |
| 6   | 3  | -3 | 32.70 | 1.03 |
| -6  | 3  | 3  | 31.36 | 1.19 |
| 5   | -3 | -3 | 17.86 | 0.80 |
| 5   | -3 | -3 | 17.65 | 0.70 |
| -5  | -3 | 3  | 17.97 | 0.67 |

|    |    |    |       |      |
|----|----|----|-------|------|
| -5 | -3 | 3  | 16.93 | 0.59 |
| 5  | -3 | -3 | 17.58 | 0.47 |
| -5 | -3 | 3  | 16.60 | 0.62 |
| -5 | 3  | 3  | 16.98 | 0.59 |
| -5 | 3  | 3  | 16.72 | 0.52 |
| -5 | 3  | 3  | 18.39 | 0.82 |
| 5  | 3  | -3 | 17.15 | 0.63 |
| 5  | 3  | -3 | 15.97 | 0.56 |
| 5  | 3  | -3 | 17.34 | 0.55 |
| 4  | -3 | -3 | 34.94 | 0.78 |
| 4  | -3 | -3 | 33.22 | 0.97 |
| -4 | -3 | 3  | 32.67 | 0.87 |
| -4 | -3 | 3  | 32.79 | 0.93 |
| -4 | -3 | 3  | 33.23 | 0.90 |
| 4  | -3 | -3 | 31.69 | 1.08 |
| 4  | 3  | -3 | 33.79 | 0.85 |
| -4 | 3  | 3  | 32.98 | 0.85 |
| 4  | 3  | -3 | 32.65 | 0.81 |
| -4 | 3  | 3  | 34.14 | 1.10 |
| -4 | 3  | 3  | 32.74 | 0.82 |
| 4  | 3  | -3 | 33.32 | 0.89 |
| -3 | -3 | 3  | 32.94 | 0.85 |
| -3 | -3 | 3  | 30.89 | 0.82 |
| 3  | -3 | -3 | 29.48 | 0.99 |
| 3  | -3 | -3 | 31.84 | 0.76 |
| 3  | -3 | -3 | 31.26 | 0.89 |
| -3 | 3  | 3  | 31.30 | 0.77 |
| 3  | 3  | -3 | 31.14 | 0.78 |
| 3  | 3  | -3 | 31.87 | 0.79 |
| 3  | 3  | -3 | 31.60 | 0.72 |
| -3 | 3  | 3  | 31.49 | 1.02 |
| 2  | -3 | -3 | 33.30 | 0.81 |
| -2 | -3 | 3  | 31.27 | 0.85 |
| -2 | -3 | 3  | 31.34 | 0.77 |
| 2  | -3 | -3 | 33.00 | 1.00 |
| -2 | -3 | 3  | 32.65 | 0.82 |
| 2  | -3 | -3 | 33.16 | 0.90 |
| 2  | 3  | -3 | 32.40 | 0.71 |
| -2 | 3  | 3  | 32.28 | 1.00 |
| -2 | 3  | 3  | 33.11 | 0.74 |
| 2  | 3  | -3 | 33.10 | 0.77 |
| -2 | 3  | 3  | 31.99 | 0.78 |
| 2  | 3  | -3 | 31.08 | 0.77 |
| 1  | -3 | -3 | 25.58 | 0.68 |
| 1  | -3 | -3 | 25.94 | 0.84 |
| -1 | -3 | 3  | 23.83 | 0.57 |

|    |    |    |       |      |
|----|----|----|-------|------|
| -1 | -3 | 3  | 25.42 | 0.72 |
| -1 | -3 | 3  | 25.19 | 0.69 |
| 1  | 3  | -3 | 25.83 | 0.63 |
| -1 | 3  | 3  | 26.24 | 0.66 |
| -1 | 3  | 3  | 26.27 | 0.56 |
| -1 | 3  | 3  | 25.53 | 0.83 |
| -1 | 3  | 3  | 26.20 | 0.73 |
| 1  | 3  | -3 | 24.88 | 0.63 |
| 1  | 3  | -3 | 25.07 | 0.62 |
| 0  | -3 | -3 | 16.01 | 0.51 |
| 0  | -3 | 3  | 15.98 | 0.52 |
| 0  | -3 | -3 | 16.36 | 0.62 |
| 0  | -3 | -3 | 17.15 | 0.63 |
| 0  | -3 | 3  | 15.98 | 0.53 |
| 0  | -3 | 3  | 16.32 | 0.44 |
| 0  | -3 | 3  | 15.82 | 0.49 |
| 0  | 3  | 3  | 15.90 | 0.49 |
| 0  | 3  | -3 | 15.80 | 0.43 |
| 0  | 3  | -3 | 16.29 | 0.48 |
| 0  | 3  | 3  | 15.09 | 0.52 |
| -1 | -3 | -3 | 20.48 | 0.41 |
| 1  | -3 | 3  | 20.25 | 0.62 |
| -1 | -3 | -3 | 19.82 | 0.71 |
| 1  | -3 | 3  | 19.46 | 0.63 |
| -1 | -3 | -3 | 19.68 | 0.60 |
| 1  | -3 | 3  | 19.38 | 0.55 |
| 1  | 3  | 3  | 18.56 | 0.60 |
| 1  | 3  | 3  | 19.31 | 0.54 |
| -1 | 3  | -3 | 19.23 | 0.47 |
| 1  | 3  | 3  | 20.36 | 0.71 |
| -1 | 3  | -3 | 20.43 | 0.61 |
| -1 | 3  | -3 | 19.50 | 0.62 |
| -2 | -3 | -3 | 17.99 | 0.43 |
| 2  | -3 | 3  | 17.30 | 0.59 |
| 2  | -3 | 3  | 16.39 | 0.66 |
| -2 | -3 | -3 | 18.05 | 0.69 |
| -2 | -3 | -3 | 17.38 | 0.59 |
| 2  | 3  | 3  | 17.92 | 0.60 |
| 2  | 3  | 3  | 16.47 | 0.50 |
| -2 | 3  | -3 | 18.30 | 0.64 |
| -2 | 3  | -3 | 16.94 | 0.40 |
| -2 | 3  | -3 | 16.88 | 0.58 |
| 2  | 3  | 3  | 18.42 | 0.70 |
| -3 | -3 | -3 | 27.07 | 0.94 |
| -3 | -3 | -3 | 26.08 | 0.66 |
| -3 | -3 | -3 | 25.35 | 0.81 |



|    |    |    |       |      |
|----|----|----|-------|------|
| 3  | -3 | 3  | 25.83 | 0.78 |
| 3  | -3 | 3  | 26.55 | 0.80 |
| 3  | -3 | 3  | 27.70 | 0.91 |
| 3  | 3  | 3  | 25.64 | 0.92 |
| -3 | 3  | -3 | 27.34 | 0.90 |
| -3 | 3  | -3 | 28.15 | 0.82 |
| 3  | 3  | 3  | 26.47 | 0.83 |
| 4  | -3 | 3  | 4.20  | 0.44 |
| 4  | -3 | 3  | 4.82  | 0.42 |
| -4 | -3 | -3 | 3.59  | 0.35 |
| -4 | -3 | -3 | 4.68  | 0.29 |
| 4  | -3 | 3  | 4.94  | 0.42 |
| -4 | -3 | -3 | 4.55  | 0.47 |
| 4  | 3  | 3  | 3.45  | 0.41 |
| -4 | 3  | -3 | 3.54  | 0.42 |
| 4  | 3  | 3  | 2.97  | 0.36 |
| 4  | 3  | 3  | 4.68  | 0.31 |
| -4 | 3  | -3 | 3.96  | 0.38 |
| -5 | -3 | -3 | 0.23  | 0.32 |
| -5 | -3 | -3 | 0.24  | 0.21 |
| 5  | -3 | 3  | 0.57  | 0.32 |
| 5  | -3 | 3  | 0.79  | 0.32 |
| 5  | -3 | 3  | 0.43  | 0.33 |
| -5 | -3 | -3 | 0.95  | 0.30 |
| -5 | 3  | -3 | 0.83  | 0.34 |
| 5  | 3  | 3  | 0.80  | 0.21 |
| -5 | 3  | -3 | 0.48  | 0.30 |
| 5  | 3  | 3  | 0.67  | 0.31 |
| 5  | 3  | 3  | 0.20  | 0.27 |
| -6 | -3 | -3 | 4.66  | 0.47 |
| -6 | -3 | -3 | 4.85  | 0.40 |
| 6  | -3 | 3  | 5.43  | 0.50 |
| 6  | -3 | 3  | 4.22  | 0.43 |
| 6  | 3  | 3  | 5.14  | 0.35 |
| 6  | 3  | 3  | 5.00  | 0.52 |
| -6 | 3  | -3 | 4.62  | 0.49 |
| 7  | -3 | 3  | 6.21  | 0.59 |
| -7 | -3 | -3 | 6.38  | 0.47 |
| -7 | -3 | -3 | 5.14  | 0.50 |
| 7  | -3 | 3  | 5.33  | 0.49 |
| -7 | 3  | -3 | 6.02  | 0.52 |
| 7  | 3  | 3  | 6.51  | 0.57 |
| -8 | -3 | -3 | 5.90  | 0.49 |
| 8  | -3 | 3  | 5.27  | 0.57 |
| -8 | -3 | -3 | 5.61  | 0.56 |
| 8  | -3 | 3  | 5.85  | 0.55 |

-8 3 -3 5.93 0.57  
8 3 3 6.24 0.59  
9 -3 3 1.95 0.47  
9 -3 3 1.45 0.42  
-9 -3 -3 0.88 0.36  
-9 -3 -3 0.95 0.40  
9 3 3 1.18 0.42  
-9 3 -3 1.35 0.38  
-9 3 -3 1.18 0.37  
10 -3 3 0.74 0.44  
-10 -3 -3 0.65 0.43  
-10 -3 -3 0.25 0.36  
10 -3 3 0.30 0.44  
10 3 3 0.41 0.41  
-10 3 -3 1.01 0.43  
-10 3 -3 0.84 0.40  
11 -3 3 -0.24 0.47  
-11 -3 -3 -0.11 0.46  
-11 3 -3 -0.29 0.36  
11 3 3 -0.19 0.43  
-12 3 -3 -0.31 0.48  
12 3 3 0.26 0.51  
-14 -4 3 -0.27 0.48  
14 4 -3 0.83 0.52  
-13 -4 3 -0.09 0.39  
13 -4 -3 0.54 0.52  
13 4 -3 0.19 0.45  
-13 4 3 -0.49 0.37  
12 -4 -3 0.35 0.47  
-12 -4 3 0.10 0.43  
12 4 -3 -0.10 0.40  
-12 4 3 -0.38 0.35  
-11 -4 3 0.55 0.41  
11 -4 -3 0.17 0.40  
-11 4 3 0.01 0.34  
11 4 -3 0.02 0.36  
-10 -4 3 -0.01 0.35  
10 -4 -3 0.28 0.39  
-10 4 3 0.01 0.35  
10 4 -3 0.64 0.35  
10 4 -3 0.14 0.30  
9 -4 -3 3.60 0.52  
-9 -4 3 3.32 0.48  
-9 4 3 3.48 0.33  
-9 4 3 2.64 0.44  
9 4 -3 3.95 0.46

9 4 -3 2.66 0.36  
-8 -4 3 11.36 0.63  
8 -4 -3 10.94 0.68  
-8 -4 3 10.56 0.63  
-8 -4 3 10.46 0.73  
8 4 -3 10.85 0.70  
-8 4 3 10.19 0.47  
-8 4 3 10.78 0.60  
8 4 -3 13.19 0.66  
8 4 -3 11.62 0.57  
-7 -4 3 3.04 0.41  
7 -4 -3 2.49 0.42  
7 -4 -3 2.77 0.26  
-7 -4 3 2.27 0.40  
-7 -4 3 2.65 0.37  
-7 4 3 1.96 0.36  
-7 4 3 3.04 0.30  
7 4 -3 2.88 0.35  
7 4 -3 2.18 0.37  
7 4 -3 2.83 0.37  
6 -4 -3 6.08 0.58  
-6 -4 3 6.07 0.47  
-6 -4 3 6.40 0.50  
6 -4 -3 6.23 0.53  
6 -4 -3 6.33 0.33  
-6 -4 3 5.40 0.44  
6 4 -3 6.39 0.47  
6 4 -3 6.16 0.42  
-6 4 3 6.25 0.42  
-6 4 3 6.06 0.37  
6 4 -3 6.69 0.45  
-6 4 3 7.66 0.67  
-5 -4 3 9.23 0.50  
-5 -4 3 11.97 0.55  
5 -4 -3 10.58 0.40  
-5 -4 3 10.30 0.52  
5 -4 -3 10.40 0.63  
5 -4 -3 9.52 0.58  
5 4 -3 10.23 0.48  
5 4 -3 10.52 0.43  
-5 4 3 11.10 0.68  
-5 4 3 10.89 0.42  
5 4 -3 10.24 0.47  
-5 4 3 9.62 0.44  
4 -4 -3 42.87 1.32  
-4 -4 3 42.27 1.09

|    |    |    |        |      |
|----|----|----|--------|------|
| 4  | -4 | -3 | 42.18  | 1.00 |
| -4 | -4 | 3  | 39.20  | 1.08 |
| 4  | -4 | -3 | 42.70  | 1.17 |
| 4  | 4  | -3 | 42.18  | 0.97 |
| 4  | 4  | -3 | 43.96  | 1.07 |
| -4 | 4  | 3  | 42.20  | 1.00 |
| -4 | 4  | 3  | 42.43  | 1.32 |
| 4  | 4  | -3 | 43.49  | 1.05 |
| -4 | 4  | 3  | 41.30  | 1.04 |
| -3 | -4 | 3  | 51.29  | 1.25 |
| 3  | -4 | -3 | 49.99  | 1.31 |
| 3  | -4 | -3 | 49.19  | 1.46 |
| -3 | -4 | 3  | 50.74  | 1.20 |
| -3 | -4 | 3  | 52.03  | 1.26 |
| 3  | -4 | -3 | 50.35  | 1.20 |
| 3  | 4  | -3 | 51.44  | 1.08 |
| -3 | 4  | 3  | 51.90  | 1.16 |
| 3  | 4  | -3 | 51.44  | 1.17 |
| 3  | 4  | -3 | 50.92  | 1.17 |
| -3 | 4  | 3  | 52.62  | 1.47 |
| 2  | -4 | -3 | 55.21  | 1.27 |
| 2  | -4 | -3 | 52.18  | 1.33 |
| -2 | -4 | 3  | 53.25  | 1.28 |
| 2  | -4 | -3 | 51.99  | 1.46 |
| -2 | -4 | 3  | 52.31  | 1.27 |
| -2 | 4  | 3  | 53.93  | 1.16 |
| -2 | 4  | 3  | 53.20  | 1.47 |
| -2 | 4  | 3  | 52.17  | 1.20 |
| 2  | 4  | -3 | 55.16  | 1.20 |
| -1 | -4 | 3  | 108.33 | 2.35 |
| 1  | -4 | -3 | 108.52 | 2.39 |
| 1  | -4 | -3 | 109.50 | 2.35 |
| 1  | -4 | -3 | 107.46 | 2.60 |
| -1 | -4 | 3  | 103.24 | 2.32 |
| 1  | 4  | -3 | 106.79 | 2.16 |
| -1 | 4  | 3  | 110.35 | 2.59 |
| -1 | 4  | 3  | 107.89 | 2.20 |
| -1 | 4  | 3  | 108.89 | 2.16 |
| 0  | -4 | 3  | 55.66  | 1.32 |
| 0  | -4 | 3  | 56.51  | 1.36 |
| 0  | -4 | -3 | 57.41  | 1.49 |
| 0  | -4 | -3 | 57.36  | 1.51 |
| 0  | -4 | 3  | 55.45  | 1.22 |
| 0  | -4 | -3 | 56.73  | 1.36 |
| 0  | -4 | 3  | 56.51  | 1.35 |
| 0  | 4  | 3  | 56.93  | 1.26 |

|    |    |    |       |      |
|----|----|----|-------|------|
| 0  | 4  | -3 | 56.36 | 1.20 |
| 0  | 4  | 3  | 56.88 | 1.35 |
| 0  | 4  | -3 | 57.09 | 1.31 |
| -1 | -4 | -3 | 4.95  | 0.34 |
| 1  | -4 | 3  | 5.41  | 0.33 |
| -1 | -4 | -3 | 6.15  | 0.41 |
| -1 | -4 | -3 | 5.85  | 0.42 |
| 1  | -4 | 3  | 4.93  | 0.29 |
| 1  | -4 | 3  | 6.14  | 0.37 |
| 1  | 4  | 3  | 5.27  | 0.38 |
| 1  | 4  | 3  | 5.14  | 0.31 |
| -1 | 4  | -3 | 4.96  | 0.25 |
| -1 | 4  | -3 | 6.06  | 0.34 |
| -1 | 4  | -3 | 5.21  | 0.34 |
| -2 | -4 | -3 | 0.48  | 0.10 |
| -2 | -4 | -3 | 0.75  | 0.22 |
| 2  | -4 | 3  | -0.01 | 0.20 |
| 2  | -4 | 3  | 0.40  | 0.19 |
| 2  | -4 | 3  | 0.22  | 0.27 |
| -2 | -4 | -3 | 0.44  | 0.23 |
| 2  | 4  | 3  | 0.27  | 0.23 |
| -2 | 4  | -3 | 0.29  | 0.11 |
| -2 | 4  | -3 | 0.09  | 0.18 |
| -2 | 4  | -3 | 0.47  | 0.20 |
| 2  | 4  | 3  | 0.07  | 0.16 |
| 2  | 4  | 3  | 0.73  | 0.25 |
| -3 | -4 | -3 | 29.51 | 0.99 |
| -3 | -4 | -3 | 28.38 | 0.89 |
| -3 | -4 | -3 | 26.70 | 0.67 |
| 3  | -4 | 3  | 29.36 | 0.83 |
| 3  | -4 | 3  | 28.17 | 0.93 |
| 3  | -4 | 3  | 27.62 | 0.86 |
| -3 | 4  | -3 | 24.97 | 0.84 |
| -3 | 4  | -3 | 28.34 | 0.93 |
| 3  | 4  | 3  | 28.69 | 0.98 |
| -3 | 4  | -3 | 27.01 | 0.59 |
| 3  | 4  | 3  | 27.46 | 0.75 |
| 3  | 4  | 3  | 27.68 | 0.87 |
| -4 | -4 | -3 | 1.79  | 0.38 |
| 4  | -4 | 3  | 1.72  | 0.32 |
| -4 | -4 | -3 | 1.51  | 0.30 |
| 4  | -4 | 3  | 1.24  | 0.30 |
| -4 | -4 | -3 | 1.68  | 0.22 |
| 4  | -4 | 3  | 1.62  | 0.34 |
| 4  | 4  | 3  | 1.23  | 0.33 |
| -4 | 4  | -3 | 1.39  | 0.34 |

|     |    |    |       |      |
|-----|----|----|-------|------|
| 4   | 4  | 3  | 1.52  | 0.35 |
| -4  | 4  | -3 | 1.39  | 0.30 |
| -5  | -4 | -3 | 5.07  | 0.56 |
| 5   | -4 | 3  | 5.05  | 0.47 |
| 5   | -4 | 3  | 5.87  | 0.54 |
| -5  | -4 | -3 | 5.99  | 0.37 |
| -5  | -4 | -3 | 5.15  | 0.46 |
| 5   | -4 | 3  | 5.77  | 0.50 |
| 5   | 4  | 3  | 5.38  | 0.54 |
| -5  | 4  | -3 | 4.44  | 0.44 |
| -5  | 4  | -3 | 4.46  | 0.50 |
| 5   | 4  | 3  | 5.70  | 0.50 |
| 5   | 4  | 3  | 5.69  | 0.38 |
| 6   | -4 | 3  | 10.43 | 0.65 |
| 6   | -4 | 3  | 9.59  | 0.57 |
| -6  | -4 | -3 | 9.17  | 0.49 |
| -6  | -4 | -3 | 9.71  | 0.59 |
| 6   | 4  | 3  | 9.71  | 0.66 |
| 6   | 4  | 3  | 10.14 | 0.46 |
| -6  | 4  | -3 | 8.01  | 0.57 |
| 7   | -4 | 3  | 1.60  | 0.38 |
| 7   | -4 | 3  | 2.09  | 0.42 |
| -7  | -4 | -3 | 1.62  | 0.31 |
| -7  | -4 | -3 | 2.57  | 0.44 |
| 7   | 4  | 3  | 2.63  | 0.43 |
| 7   | 4  | 3  | 1.86  | 0.28 |
| -7  | 4  | -3 | 1.11  | 0.38 |
| 8   | -4 | 3  | 3.05  | 0.45 |
| -8  | -4 | -3 | 3.37  | 0.41 |
| 8   | -4 | 3  | 2.93  | 0.48 |
| -8  | -4 | -3 | 3.08  | 0.46 |
| 8   | 4  | 3  | 2.92  | 0.49 |
| -8  | 4  | -3 | 3.45  | 0.47 |
| 9   | -4 | 3  | 3.14  | 0.55 |
| -9  | -4 | -3 | 1.82  | 0.43 |
| 9   | -4 | 3  | 1.98  | 0.43 |
| 9   | 4  | 3  | 2.31  | 0.49 |
| -9  | 4  | -3 | 1.96  | 0.43 |
| 10  | -4 | 3  | 0.95  | 0.48 |
| -10 | -4 | -3 | 0.74  | 0.48 |
| 10  | -4 | 3  | 1.21  | 0.46 |
| -10 | 4  | -3 | 0.08  | 0.42 |
| 10  | 4  | 3  | -0.20 | 0.42 |
| -10 | 4  | -3 | 1.38  | 0.42 |
| 11  | -4 | 3  | 1.07  | 0.49 |
| -11 | -4 | -3 | 0.57  | 0.53 |

-11 4 -3 0.66 0.47  
11 4 3 0.35 0.46  
12 4 3 0.66 0.59  
-13 -5 3 0.07 0.47  
13 -5 -3 0.34 0.52  
-13 5 3 -0.12 0.46  
-12 -5 3 -0.35 0.40  
12 -5 -3 0.29 0.47  
12 5 -3 -0.07 0.42  
-12 5 3 -0.05 0.39  
11 -5 -3 -0.02 0.45  
-11 -5 3 0.35 0.39  
11 5 -3 0.41 0.38  
-11 5 3 0.56 0.37  
11 5 -3 -0.33 0.35  
-10 -5 3 1.24 0.42  
10 -5 -3 1.90 0.50  
10 5 -3 1.53 0.40  
-10 5 3 1.29 0.41  
10 5 -3 1.51 0.35  
9 -5 -3 2.01 0.51  
-9 -5 3 2.00 0.41  
-9 -5 3 1.13 0.45  
-9 5 3 1.48 0.39  
9 5 -3 1.40 0.37  
9 5 -3 2.37 0.40  
-8 -5 3 4.29 0.48  
8 -5 -3 4.33 0.50  
-8 -5 3 3.25 0.47  
-8 -5 3 3.97 0.47  
8 5 -3 3.58 0.44  
-8 5 3 3.98 0.35  
8 5 -3 3.46 0.40  
-8 5 3 4.73 0.48  
8 5 -3 4.48 0.45  
-7 -5 3 12.58 0.67  
-7 -5 3 11.14 0.68  
-7 -5 3 12.94 0.68  
7 -5 -3 11.36 0.49  
7 -5 -3 10.88 0.73  
-7 5 3 11.69 0.50  
7 5 -3 11.78 0.58  
-7 5 3 10.31 0.62  
7 5 -3 11.82 0.58  
7 5 -3 11.71 0.64  
6 -5 -3 1.03 0.39

-6 -5 3 1.63 0.30  
6 -5 -3 1.00 0.34  
-6 -5 3 1.16 0.30  
6 -5 -3 1.99 0.26  
-6 5 3 1.62 0.43  
-6 5 3 1.70 0.28  
6 5 -3 1.36 0.30  
6 5 -3 1.21 0.26  
-6 5 3 1.91 0.32  
6 5 -3 1.45 0.28  
5 -5 -3 17.77 0.87  
-5 -5 3 17.14 0.65  
5 -5 -3 18.38 0.59  
-5 -5 3 19.37 0.72  
5 -5 -3 17.50 0.73  
-5 5 3 18.05 0.88  
5 5 -3 17.62 0.64  
5 5 -3 17.91 0.55  
-5 5 3 16.57 0.61  
-5 5 3 17.62 0.60  
5 5 -3 17.45 0.62  
4 -5 -3 30.11 1.09  
-4 -5 3 27.78 0.87  
4 -5 -3 30.84 0.96  
4 -5 -3 29.40 0.80  
-4 -5 3 29.34 0.91  
-4 -5 3 28.65 0.80  
4 5 -3 29.06 0.78  
-4 5 3 30.73 0.80  
-4 5 3 28.58 0.81  
4 5 -3 28.88 0.83  
4 5 -3 30.14 0.71  
-4 5 3 29.56 1.08  
3 -5 -3 23.34 0.90  
-3 -5 3 23.34 0.77  
-3 -5 3 22.94 0.74  
3 -5 -3 23.83 0.80  
3 -5 -3 22.94 0.71  
3 5 -3 23.49 0.69  
-3 5 3 22.07 0.63  
-3 5 3 23.53 0.69  
-3 5 3 22.81 0.90  
2 -5 -3 123.39 2.69  
-2 -5 3 126.32 2.70  
2 -5 -3 123.14 2.74  
-2 -5 3 122.49 2.66



2 -5 -3 120.26 2.96  
2 5 -3 120.32 2.50  
-2 5 3 124.94 2.53  
-2 5 3 122.61 2.51  
-2 5 3 120.82 2.95  
-1 -5 3 6.87 0.42  
1 -5 -3 7.79 0.45  
1 -5 -3 7.95 0.52  
-1 -5 3 7.93 0.44  
1 -5 -3 7.28 0.45  
-1 5 3 7.26 0.25  
-1 5 3 7.99 0.49  
1 5 -3 7.43 0.37  
-1 5 3 7.86 0.39  
0 -5 -3 0.18 0.21  
0 -5 3 0.19 0.11  
0 -5 -3 0.27 0.21  
0 -5 3 0.10 0.12  
0 -5 3 0.30 0.23  
0 -5 -3 -0.06 0.20  
0 5 -3 0.22 0.13  
0 5 -3 0.42 0.16  
0 5 3 0.15 0.19  
0 5 3 0.25 0.07  
0 5 3 0.54 0.23  
-1 -5 -3 6.30 0.46  
-1 -5 -3 6.29 0.45  
1 -5 3 6.76 0.36  
1 -5 3 7.13 0.42  
1 -5 3 7.04 0.31  
-1 -5 -3 6.59 0.47  
-1 5 -3 6.20 0.38  
-1 5 -3 6.51 0.36  
1 5 3 6.94 0.19  
1 5 3 6.74 0.43  
1 5 3 6.98 0.38  
-1 5 -3 6.63 0.32  
-2 -5 -3 27.41 0.63  
-2 -5 -3 30.04 0.97  
2 -5 3 27.54 0.86  
2 -5 3 26.78 0.77  
-2 -5 -3 27.68 0.88  
2 -5 3 28.66 0.89  
-2 5 -3 27.94 0.87  
2 5 3 27.61 0.95  
2 5 3 27.93 0.79

|    |    |    |       |      |
|----|----|----|-------|------|
| 2  | 5  | 3  | 27.77 | 0.85 |
| -2 | 5  | -3 | 28.14 | 0.68 |
| 3  | -5 | 3  | 9.59  | 0.52 |
| -3 | -5 | -3 | 9.66  | 0.60 |
| -3 | -5 | -3 | 9.97  | 0.34 |
| -3 | -5 | -3 | 9.21  | 0.53 |
| 3  | 5  | 3  | 9.32  | 0.45 |
| 3  | 5  | 3  | 10.93 | 0.65 |
| -3 | 5  | -3 | 9.91  | 0.33 |
| -3 | 5  | -3 | 10.62 | 0.58 |
| -3 | 5  | -3 | 9.79  | 0.56 |
| 3  | 5  | 3  | 10.12 | 0.55 |
| 4  | -5 | 3  | 11.90 | 0.57 |
| 4  | -5 | 3  | 11.81 | 0.63 |
| -4 | -5 | -3 | 12.46 | 0.74 |
| -4 | -5 | -3 | 11.34 | 0.43 |
| -4 | -5 | -3 | 11.90 | 0.61 |
| 4  | -5 | 3  | 10.54 | 0.63 |
| 4  | 5  | 3  | 12.07 | 0.63 |
| 4  | 5  | 3  | 11.23 | 0.69 |
| -4 | 5  | -3 | 10.13 | 0.57 |
| 4  | 5  | 3  | 11.53 | 0.53 |
| -4 | 5  | -3 | 11.42 | 0.66 |
| -5 | -5 | -3 | 3.52  | 0.47 |
| -5 | -5 | -3 | 3.45  | 0.31 |
| -5 | -5 | -3 | 3.11  | 0.47 |
| 5  | -5 | 3  | 2.91  | 0.42 |
| 5  | -5 | 3  | 3.44  | 0.45 |
| 5  | -5 | 3  | 3.23  | 0.41 |
| -5 | 5  | -3 | 2.93  | 0.46 |
| 5  | 5  | 3  | 3.18  | 0.44 |
| -5 | 5  | -3 | 2.77  | 0.40 |
| 5  | 5  | 3  | 2.05  | 0.39 |
| 6  | -5 | 3  | 12.71 | 0.69 |
| 6  | -5 | 3  | 12.91 | 0.69 |
| -6 | -5 | -3 | 11.69 | 0.53 |
| -6 | -5 | -3 | 12.84 | 0.69 |
| 6  | 5  | 3  | 13.05 | 0.72 |
| -6 | 5  | -3 | 12.46 | 0.69 |
| 6  | 5  | 3  | 12.87 | 0.56 |
| 7  | -5 | 3  | 1.49  | 0.41 |
| -7 | -5 | -3 | 2.16  | 0.45 |
| 7  | -5 | 3  | 2.46  | 0.44 |
| 7  | 5  | 3  | 2.19  | 0.44 |
| -7 | 5  | -3 | 2.25  | 0.44 |
| 7  | 5  | 3  | 2.85  | 0.34 |

-8 -5 -3 0.18 0.34  
8 -5 3 0.55 0.37  
8 -5 3 0.72 0.41  
8 5 3 0.69 0.41  
-8 5 -3 0.88 0.36  
9 -5 3 1.64 0.42  
9 -5 3 1.18 0.46  
-9 -5 -3 1.81 0.50  
-9 5 -3 1.51 0.43  
9 5 3 2.05 0.48  
-10 -5 -3 -0.46 0.45  
10 -5 3 0.74 0.50  
10 5 3 1.30 0.49  
-10 5 -3 0.42 0.46  
-11 -5 -3 -0.54 0.49  
11 -5 3 0.54 0.52  
-11 5 -3 -0.07 0.47  
11 5 3 0.36 0.50  
-13 -6 3 0.01 0.44  
13 -6 -3 0.62 0.55  
-13 6 3 -0.18 0.41  
-12 -6 3 0.10 0.42  
12 -6 -3 0.62 0.49  
-12 6 3 0.13 0.46  
11 -6 -3 0.70 0.47  
-11 -6 3 1.21 0.44  
-11 6 3 1.24 0.46  
11 6 -3 1.64 0.41  
10 -6 -3 1.20 0.43  
-10 -6 3 1.30 0.42  
10 6 -3 1.35 0.41  
-10 6 3 0.94 0.36  
-9 -6 3 -0.25 0.37  
9 -6 -3 0.64 0.43  
-9 -6 3 0.27 0.31  
-9 6 3 -0.45 0.31  
9 6 -3 0.20 0.30  
9 6 -3 -0.08 0.27  
-8 -6 3 2.26 0.38  
8 -6 -3 2.19 0.47  
-8 -6 3 1.84 0.46  
-8 6 3 2.47 0.32  
8 6 -3 1.72 0.35  
-8 6 3 1.97 0.37  
8 6 -3 1.74 0.33  
7 -6 -3 3.47 0.34

-7 -6 3 2.70 0.41  
7 -6 -3 3.33 0.49  
-7 6 3 3.89 0.44  
7 6 -3 3.69 0.39  
-7 6 3 4.45 0.37  
7 6 -3 4.01 0.37  
7 6 -3 3.67 0.43  
6 -6 -3 10.06 0.70  
-6 -6 3 11.52 0.69  
6 -6 -3 12.15 0.53  
-6 -6 3 11.77 0.64  
-6 -6 3 11.56 0.59  
-6 6 3 12.29 0.85  
-6 6 3 11.41 0.53  
6 6 -3 12.34 0.51  
6 6 -3 12.09 0.57  
-6 6 3 12.67 0.62  
6 6 -3 12.85 0.60  
-5 -6 3 14.55 0.67  
5 -6 -3 14.08 0.59  
-5 -6 3 15.44 0.74  
5 -6 -3 14.34 0.84  
-5 -6 3 14.64 0.57  
5 -6 -3 14.27 0.73  
5 6 -3 15.79 0.66  
-5 6 3 14.89 0.84  
5 6 -3 14.57 0.55  
5 6 -3 14.51 0.49  
-5 6 3 15.02 0.61  
-5 6 3 14.13 0.58  
-4 -6 3 3.67 0.45  
-4 -6 3 3.53 0.25  
-4 -6 3 3.75 0.39  
4 -6 -3 3.40 0.47  
4 -6 -3 3.25 0.35  
4 -6 -3 3.92 0.43  
4 6 -3 3.55 0.37  
-4 6 3 4.32 0.50  
-4 6 3 3.72 0.34  
4 6 -3 3.31 0.25  
4 6 -3 3.86 0.23  
3 -6 -3 19.89 0.86  
-3 -6 3 18.04 0.67  
3 -6 -3 19.63 0.69  
-3 -6 3 18.73 0.73  
3 -6 -3 18.97 0.75

|    |    |    |       |      |
|----|----|----|-------|------|
| -3 | 6  | 3  | 19.21 | 0.64 |
| -3 | 6  | 3  | 19.06 | 0.59 |
| 3  | 6  | -3 | 18.58 | 0.65 |
| -3 | 6  | 3  | 20.14 | 0.85 |
| 2  | -6 | -3 | 30.19 | 0.95 |
| -2 | -6 | 3  | 30.75 | 0.95 |
| 2  | -6 | -3 | 32.24 | 1.09 |
| -2 | -6 | 3  | 30.71 | 0.92 |
| 2  | -6 | -3 | 31.29 | 0.96 |
| -2 | 6  | 3  | 32.27 | 1.07 |
| 2  | 6  | -3 | 31.68 | 0.86 |
| -2 | 6  | 3  | 32.05 | 0.78 |
| -2 | 6  | 3  | 31.22 | 0.87 |
| 1  | -6 | -3 | 20.14 | 0.82 |
| 1  | -6 | -3 | 20.38 | 0.71 |
| -1 | -6 | 3  | 19.69 | 0.70 |
| -1 | -6 | 3  | 20.76 | 0.76 |
| 1  | -6 | -3 | 20.84 | 0.74 |
| -1 | 6  | 3  | 20.56 | 0.79 |
| -1 | 6  | 3  | 19.20 | 0.66 |
| 1  | 6  | -3 | 20.81 | 0.63 |
| -1 | 6  | 3  | 19.49 | 0.52 |
| 0  | -6 | -3 | 23.35 | 0.87 |
| 0  | -6 | 3  | 21.47 | 0.54 |
| 0  | -6 | 3  | 21.54 | 0.76 |
| 0  | -6 | -3 | 22.72 | 0.82 |
| 0  | -6 | 3  | 21.68 | 0.60 |
| 0  | -6 | -3 | 21.01 | 0.77 |
| 0  | 6  | -3 | 21.79 | 0.64 |
| 0  | 6  | -3 | 22.89 | 0.74 |
| 0  | 6  | -3 | 21.43 | 0.62 |
| 0  | 6  | 3  | 22.41 | 0.52 |
| 0  | 6  | 3  | 20.63 | 0.69 |
| 0  | 6  | 3  | 22.08 | 0.74 |
| 1  | -6 | 3  | 6.61  | 0.37 |
| -1 | -6 | -3 | 6.80  | 0.49 |
| 1  | -6 | 3  | 7.12  | 0.47 |
| -1 | -6 | -3 | 5.90  | 0.47 |
| -1 | -6 | -3 | 7.40  | 0.54 |
| 1  | -6 | 3  | 6.94  | 0.33 |
| 1  | 6  | 3  | 7.00  | 0.43 |
| 1  | 6  | 3  | 6.63  | 0.23 |
| 1  | 6  | 3  | 7.55  | 0.45 |
| -1 | 6  | -3 | 6.72  | 0.42 |
| -1 | 6  | -3 | 7.12  | 0.40 |
| -1 | 6  | -3 | 5.89  | 0.35 |

|    |    |    |       |      |
|----|----|----|-------|------|
| 2  | -6 | 3  | 7.02  | 0.48 |
| 2  | -6 | 3  | 7.34  | 0.45 |
| -2 | -6 | -3 | 7.12  | 0.26 |
| -2 | -6 | -3 | 8.10  | 0.56 |
| -2 | -6 | -3 | 7.06  | 0.52 |
| -2 | -6 | -3 | 8.05  | 0.52 |
| 2  | -6 | 3  | 6.53  | 0.40 |
| 2  | 6  | 3  | 6.84  | 0.44 |
| -2 | 6  | -3 | 7.40  | 0.47 |
| -2 | 6  | -3 | 7.34  | 0.48 |
| 2  | 6  | 3  | 7.57  | 0.49 |
| -2 | 6  | -3 | 7.30  | 0.36 |
| -3 | -6 | -3 | 0.51  | 0.30 |
| -3 | -6 | -3 | 0.45  | 0.15 |
| 3  | -6 | 3  | -0.03 | 0.28 |
| -3 | -6 | -3 | 0.54  | 0.35 |
| 3  | -6 | 3  | 0.54  | 0.25 |
| 3  | -6 | 3  | 0.33  | 0.25 |
| 3  | 6  | 3  | 0.28  | 0.27 |
| -3 | 6  | -3 | 0.23  | 0.17 |
| 3  | 6  | 3  | 0.27  | 0.29 |
| 3  | 6  | 3  | 0.58  | 0.31 |
| -3 | 6  | -3 | 0.62  | 0.27 |
| -3 | 6  | -3 | 0.23  | 0.27 |
| -4 | -6 | -3 | 8.08  | 0.62 |
| -4 | -6 | -3 | 6.41  | 0.34 |
| 4  | -6 | 3  | 6.34  | 0.53 |
| -4 | -6 | -3 | 6.90  | 0.58 |
| 4  | 6  | 3  | 7.29  | 0.45 |
| -4 | 6  | -3 | 5.40  | 0.49 |
| 4  | 6  | 3  | 6.76  | 0.52 |
| -4 | 6  | -3 | 7.15  | 0.56 |
| 4  | 6  | 3  | 6.08  | 0.53 |
| -5 | -6 | -3 | 18.96 | 0.96 |
| 5  | -6 | 3  | 19.53 | 0.79 |
| 5  | -6 | 3  | 18.71 | 0.79 |
| -5 | -6 | -3 | 19.45 | 0.84 |
| 5  | -6 | 3  | 19.77 | 0.98 |
| -5 | 6  | -3 | 18.22 | 0.90 |
| 5  | 6  | 3  | 21.28 | 0.85 |
| -5 | 6  | -3 | 20.98 | 0.88 |
| 5  | 6  | 3  | 19.35 | 0.72 |
| 6  | -6 | 3  | 5.94  | 0.53 |
| 6  | -6 | 3  | 5.12  | 0.49 |
| -6 | -6 | -3 | 6.09  | 0.60 |
| -6 | 6  | -3 | 6.14  | 0.57 |

6 6 3 5.28 0.54  
6 6 3 5.92 0.50  
-7 -6 -3 2.47 0.48  
7 -6 3 3.85 0.49  
7 -6 3 3.67 0.50  
7 6 3 3.42 0.49  
-7 6 -3 2.29 0.44  
-8 -6 -3 -0.18 0.39  
8 -6 3 -0.24 0.35  
8 -6 3 0.01 0.33  
8 6 3 -0.06 0.36  
-8 6 -3 -0.03 0.37  
9 -6 3 -0.06 0.41  
9 -6 3 0.41 0.39  
-9 -6 -3 0.28 0.46  
9 6 3 0.17 0.42  
-9 6 -3 0.33 0.41  
10 -6 3 -0.26 0.46  
-10 -6 -3 -0.66 0.40  
10 -6 3 -0.07 0.47  
10 6 3 -0.23 0.45  
-10 6 -3 -0.04 0.44  
11 -6 3 0.23 0.49  
-11 -6 -3 -0.45 0.52  
-11 6 -3 0.26 0.49  
11 6 3 0.15 0.52  
-13 -7 3 -0.05 0.47  
12 -7 -3 0.13 0.49  
-12 -7 3 -0.17 0.44  
-12 7 3 -0.60 0.44  
-11 -7 3 -0.34 0.38  
11 -7 -3 0.01 0.47  
11 7 -3 -0.08 0.40  
-11 7 3 0.20 0.42  
10 -7 -3 0.63 0.46  
-10 -7 3 0.13 0.35  
10 7 -3 0.90 0.36  
-10 7 3 0.54 0.40  
9 -7 -3 1.19 0.47  
-9 -7 3 -0.56 0.42  
-9 -7 3 -0.29 0.26  
9 7 -3 0.18 0.33  
-9 7 3 -0.17 0.27  
8 -7 -3 0.56 0.41  
-8 -7 3 0.23 0.33  
-8 7 3 0.14 0.23

|    |    |    |       |      |
|----|----|----|-------|------|
| 8  | 7  | -3 | 0.25  | 0.29 |
| -8 | 7  | 3  | 0.05  | 0.31 |
| 7  | -7 | -3 | 5.67  | 0.43 |
| -7 | -7 | 3  | 5.37  | 0.51 |
| -7 | -7 | 3  | 4.84  | 0.54 |
| 7  | -7 | -3 | 4.67  | 0.52 |
| 7  | 7  | -3 | 4.90  | 0.47 |
| -7 | 7  | 3  | 6.23  | 0.54 |
| -7 | 7  | 3  | 5.07  | 0.42 |
| -6 | -7 | 3  | 11.16 | 0.74 |
| 6  | -7 | -3 | 11.72 | 0.73 |
| 6  | -7 | -3 | 11.08 | 0.56 |
| -6 | -7 | 3  | 11.02 | 0.61 |
| -6 | 7  | 3  | 10.94 | 0.55 |
| -6 | 7  | 3  | 10.44 | 0.60 |
| 6  | 7  | -3 | 11.75 | 0.61 |
| -5 | -7 | 3  | 41.00 | 1.22 |
| 5  | -7 | -3 | 44.72 | 1.48 |
| 5  | -7 | -3 | 42.04 | 1.30 |
| -5 | -7 | 3  | 40.82 | 1.30 |
| 5  | -7 | -3 | 42.60 | 1.17 |
| 5  | 7  | -3 | 42.56 | 1.20 |
| -5 | 7  | 3  | 41.83 | 1.13 |
| -5 | 7  | 3  | 41.35 | 1.17 |
| 5  | 7  | -3 | 44.04 | 1.19 |
| -5 | 7  | 3  | 41.83 | 1.50 |
| -4 | -7 | 3  | 20.08 | 0.77 |
| 4  | -7 | -3 | 20.84 | 0.96 |
| 4  | -7 | -3 | 19.55 | 0.74 |
| 4  | -7 | -3 | 20.60 | 0.84 |
| -4 | -7 | 3  | 19.08 | 0.81 |
| -4 | 7  | 3  | 19.25 | 0.69 |
| -4 | 7  | 3  | 20.69 | 0.97 |
| 4  | 7  | -3 | 19.51 | 0.73 |
| 3  | -7 | -3 | 10.44 | 0.74 |
| 3  | -7 | -3 | 12.68 | 0.69 |
| 3  | -7 | -3 | 11.06 | 0.60 |
| -3 | -7 | 3  | 10.56 | 0.63 |
| -3 | -7 | 3  | 12.10 | 0.60 |
| 3  | 7  | -3 | 10.68 | 0.54 |
| -3 | 7  | 3  | 11.79 | 0.48 |
| -3 | 7  | 3  | 10.77 | 0.53 |
| -3 | 7  | 3  | 11.60 | 0.70 |
| 2  | -7 | -3 | 19.34 | 0.80 |
| 2  | -7 | -3 | 20.15 | 0.76 |
| -2 | -7 | 3  | 19.37 | 0.74 |



|    |    |    |       |      |
|----|----|----|-------|------|
| -2 | -7 | 3  | 19.24 | 0.77 |
| 2  | -7 | -3 | 19.16 | 0.86 |
| 2  | 7  | -3 | 17.79 | 0.66 |
| -2 | 7  | 3  | 20.05 | 0.84 |
| -2 | 7  | 3  | 18.38 | 0.57 |
| -2 | 7  | 3  | 19.40 | 0.69 |
| -1 | -7 | 3  | 9.61  | 0.58 |
| 1  | -7 | -3 | 9.72  | 0.65 |
| 1  | -7 | -3 | 9.29  | 0.68 |
| -1 | -7 | 3  | 9.15  | 0.54 |
| -1 | 7  | 3  | 9.03  | 0.35 |
| -1 | 7  | 3  | 9.92  | 0.58 |
| 1  | 7  | -3 | 10.11 | 0.48 |
| -1 | 7  | 3  | 8.77  | 0.50 |
| 0  | -7 | -3 | 11.09 | 0.63 |
| 0  | -7 | 3  | 9.84  | 0.59 |
| 0  | -7 | 3  | 10.28 | 0.38 |
| 0  | -7 | -3 | 11.84 | 0.63 |
| 0  | -7 | 3  | 10.32 | 0.33 |
| 0  | 7  | 3  | 10.22 | 0.34 |
| 0  | 7  | -3 | 10.53 | 0.53 |
| 0  | 7  | -3 | 10.71 | 0.41 |
| 0  | 7  | 3  | 10.83 | 0.53 |
| 0  | 7  | -3 | 11.40 | 0.48 |
| 1  | -7 | 3  | 3.52  | 0.45 |
| 1  | -7 | 3  | 2.52  | 0.26 |
| -1 | -7 | -3 | 3.14  | 0.38 |
| -1 | -7 | -3 | 3.23  | 0.48 |
| 1  | -7 | 3  | 3.20  | 0.25 |
| 1  | 7  | 3  | 3.82  | 0.39 |
| -1 | 7  | -3 | 2.51  | 0.34 |
| -1 | 7  | -3 | 2.97  | 0.30 |
| 1  | 7  | 3  | 3.11  | 0.19 |
| 1  | 7  | 3  | 2.60  | 0.37 |
| -1 | 7  | -3 | 2.80  | 0.31 |
| -2 | -7 | -3 | 5.15  | 0.52 |
| 2  | -7 | 3  | 5.80  | 0.49 |
| -2 | -7 | -3 | 5.75  | 0.49 |
| 2  | -7 | 3  | 5.87  | 0.42 |
| 2  | -7 | 3  | 5.55  | 0.37 |
| -2 | 7  | -3 | 5.92  | 0.44 |
| -2 | 7  | -3 | 6.29  | 0.40 |
| 2  | 7  | 3  | 6.26  | 0.49 |
| 2  | 7  | 3  | 6.24  | 0.47 |
| -2 | 7  | -3 | 5.78  | 0.47 |
| 3  | -7 | 3  | 1.21  | 0.27 |

3 -7 3 0.63 0.33  
-3 -7 -3 0.57 0.31  
3 -7 3 0.80 0.27  
-3 -7 -3 0.95 0.36  
-3 7 -3 0.31 0.28  
-3 7 -3 0.60 0.22  
3 7 3 0.87 0.34  
-3 7 -3 0.75 0.33  
3 7 3 1.00 0.30  
-4 -7 -3 7.64 0.64  
4 -7 3 6.21 0.56  
4 -7 3 7.22 0.54  
-4 -7 -3 7.24 0.61  
4 -7 3 6.25 0.53  
4 7 3 8.24 0.58  
4 7 3 7.58 0.61  
-4 7 -3 9.39 0.62  
-4 7 -3 7.12 0.59  
4 7 3 7.43 0.50  
5 -7 3 8.47 0.57  
5 -7 3 8.01 0.55  
-5 -7 -3 8.02 0.67  
5 7 3 6.86 0.48  
5 7 3 7.88 0.59  
-5 7 -3 5.95 0.61  
-5 7 -3 8.87 0.65  
6 -7 3 3.52 0.47  
6 -7 3 3.05 0.45  
-6 -7 -3 4.58 0.57  
6 7 3 3.51 0.50  
-6 7 -3 3.17 0.48  
6 7 3 3.68 0.42  
-7 -7 -3 -0.01 0.41  
7 -7 3 0.67 0.37  
7 -7 3 0.99 0.39  
7 7 3 0.66 0.40  
7 7 3 1.01 0.33  
-7 7 -3 0.55 0.38  
-8 -7 -3 1.01 0.48  
8 -7 3 0.63 0.38  
8 -7 3 0.88 0.43  
8 7 3 1.96 0.47  
-8 7 -3 -0.07 0.35  
9 -7 3 0.31 0.43  
-9 -7 -3 -0.62 0.45  
9 -7 3 -0.17 0.39

9 7 3 -0.11 0.44  
-9 7 -3 -0.02 0.38  
-10 -7 -3 0.25 0.54  
10 -7 3 0.79 0.51  
10 7 3 0.08 0.48  
-10 7 -3 -0.16 0.44  
11 -7 3 1.09 0.56  
-11 -7 -3 0.41 0.58  
11 7 3 0.21 0.53  
-12 -8 3 0.73 0.64  
12 -8 -3 0.27 0.51  
12 8 -3 0.19 0.54  
-12 8 3 0.38 0.52  
11 -8 -3 1.93 0.56  
-11 -8 3 0.63 0.44  
-11 8 3 0.58 0.46  
11 8 -3 0.22 0.44  
-10 -8 3 0.76 0.41  
10 -8 -3 0.21 0.46  
-10 8 3 0.64 0.37  
10 8 -3 0.38 0.41  
9 -8 -3 0.49 0.44  
-9 -8 3 0.18 0.34  
-9 8 3 -0.23 0.34  
9 8 -3 0.46 0.38  
8 -8 -3 1.87 0.49  
-8 -8 3 1.52 0.48  
-8 -8 3 2.79 0.44  
-8 8 3 2.67 0.45  
8 8 -3 2.30 0.41  
-7 -8 3 3.52 0.54  
7 -8 -3 2.57 0.36  
-7 -8 3 3.50 0.45  
7 -8 -3 2.31 0.47  
-7 8 3 2.59 0.42  
7 8 -3 2.27 0.39  
-7 8 3 2.34 0.36  
-6 -8 3 20.21 0.84  
6 -8 -3 20.62 0.78  
-6 -8 3 22.10 0.97  
6 -8 -3 22.56 0.93  
6 8 -3 20.44 0.82  
-6 8 3 19.81 0.80  
-6 8 3 21.34 0.77  
-5 -8 3 14.07 0.69  
-5 -8 3 14.57 0.78

|    |    |    |       |      |
|----|----|----|-------|------|
| 5  | -8 | -3 | 14.78 | 0.78 |
| 5  | -8 | -3 | 14.73 | 0.69 |
| 5  | 8  | -3 | 15.55 | 0.70 |
| -5 | 8  | 3  | 15.54 | 0.68 |
| -5 | 8  | 3  | 15.26 | 1.02 |
| -5 | 8  | 3  | 15.00 | 0.66 |
| 4  | -8 | -3 | 3.97  | 0.54 |
| -4 | -8 | 3  | 4.92  | 0.48 |
| 4  | -8 | -3 | 4.99  | 0.53 |
| 4  | -8 | -3 | 4.59  | 0.47 |
| -4 | -8 | 3  | 5.06  | 0.58 |
| -4 | 8  | 3  | 5.18  | 0.46 |
| -4 | 8  | 3  | 4.83  | 0.45 |
| -4 | 8  | 3  | 4.26  | 0.55 |
| 4  | 8  | -3 | 4.68  | 0.45 |
| -3 | -8 | 3  | 7.10  | 0.59 |
| -3 | -8 | 3  | 6.76  | 0.53 |
| 3  | -8 | -3 | 7.23  | 0.56 |
| 3  | -8 | -3 | 6.90  | 0.62 |
| 3  | -8 | -3 | 6.86  | 0.55 |
| -3 | 8  | 3  | 6.76  | 0.41 |
| -3 | 8  | 3  | 7.63  | 0.63 |
| 3  | 8  | -3 | 6.55  | 0.50 |
| -3 | 8  | 3  | 6.94  | 0.49 |
| -2 | -8 | 3  | 3.79  | 0.42 |
| 2  | -8 | -3 | 4.14  | 0.46 |
| -2 | -8 | 3  | 4.89  | 0.50 |
| -2 | 8  | 3  | 5.31  | 0.52 |
| -2 | 8  | 3  | 4.85  | 0.43 |
| 2  | 8  | -3 | 4.48  | 0.41 |
| -2 | 8  | 3  | 5.08  | 0.33 |
| -1 | -8 | 3  | 4.15  | 0.48 |
| 1  | -8 | -3 | 3.60  | 0.48 |
| -1 | -8 | 3  | 4.01  | 0.43 |
| -1 | 8  | 3  | 4.13  | 0.44 |
| -1 | 8  | 3  | 3.89  | 0.42 |
| -1 | 8  | 3  | 4.10  | 0.28 |
| 1  | 8  | -3 | 4.09  | 0.38 |
| 0  | -8 | -3 | 0.82  | 0.42 |
| 0  | -8 | -3 | 0.41  | 0.28 |
| 0  | -8 | 3  | 0.87  | 0.18 |
| 0  | -8 | -3 | 0.69  | 0.34 |
| 0  | -8 | -3 | 1.02  | 0.41 |
| 0  | -8 | 3  | 0.91  | 0.40 |
| 0  | 8  | -3 | 1.55  | 0.31 |
| 0  | 8  | 3  | 0.83  | 0.17 |

0 8 3 1.14 0.30  
0 8 -3 1.00 0.30  
0 8 -3 0.65 0.16  
1 -8 3 1.54 0.23  
1 -8 3 1.88 0.31  
-1 -8 -3 2.24 0.37  
-1 -8 -3 1.33 0.41  
-1 -8 -3 1.70 0.36  
1 -8 3 1.27 0.38  
-1 8 -3 2.18 0.34  
-1 8 -3 1.35 0.26  
1 8 3 1.49 0.34  
-1 8 -3 1.48 0.30  
1 8 3 1.34 0.34  
-2 -8 -3 3.02 0.40  
-2 -8 -3 2.68 0.40  
2 -8 3 3.05 0.31  
2 -8 3 2.96 0.32  
2 -8 3 2.26 0.41  
-2 -8 -3 1.86 0.45  
-2 8 -3 2.48 0.41  
2 8 3 2.52 0.38  
2 8 3 2.35 0.38  
-2 8 -3 2.59 0.36  
-2 8 -3 3.20 0.32  
-3 -8 -3 8.42 0.67  
3 -8 3 6.90 0.59  
3 -8 3 8.18 0.49  
-3 -8 -3 8.88 0.64  
3 -8 3 8.04 0.54  
3 8 3 7.52 0.55  
3 8 3 7.77 0.54  
-3 8 -3 7.19 0.57  
-3 8 -3 7.51 0.44  
-3 8 -3 6.45 0.55  
-4 -8 -3 9.80 0.70  
4 -8 3 10.34 0.56  
-4 -8 -3 8.68 0.70  
4 -8 3 9.73 0.64  
4 -8 3 9.19 0.66  
-4 8 -3 8.58 0.67  
4 8 3 10.94 0.59  
-4 8 -3 9.54 0.61  
4 8 3 10.22 0.61  
-5 -8 -3 0.40 0.39  
5 -8 3 1.09 0.39

5 8 3 0.40 0.34  
-5 8 -3 0.87 0.38  
5 8 3 0.61 0.33  
6 -8 3 0.47 0.38  
-6 -8 -3 -0.05 0.37  
6 -8 3 -0.01 0.30  
-6 8 -3 -0.27 0.29  
6 8 3 0.31 0.36  
6 8 3 0.05 0.30  
-7 -8 -3 -0.35 0.43  
7 -8 3 0.52 0.37  
7 -8 3 0.15 0.36  
7 8 3 0.26 0.40  
-7 8 -3 0.47 0.35  
7 8 3 -0.30 0.30  
8 -8 3 0.21 0.39  
-8 -8 -3 -0.40 0.47  
8 -8 3 -0.05 0.39  
8 8 3 0.03 0.42  
-8 8 -3 0.19 0.42  
8 8 3 0.29 0.34  
9 -8 3 0.46 0.46  
-9 -8 -3 -0.22 0.54  
9 -8 3 0.32 0.44  
9 8 3 0.53 0.48  
-9 8 -3 0.50 0.46  
-10 -8 -3 -0.29 0.57  
10 -8 3 0.65 0.52  
-10 8 -3 0.29 0.51  
10 8 3 0.70 0.57  
-11 -8 -3 -0.69 0.60  
12 -9 -3 0.66 0.62  
12 9 -3 -0.51 0.47  
-12 9 3 0.74 0.89  
11 -9 -3 0.70 0.52  
-11 9 3 0.66 0.43  
11 9 -3 0.85 0.51  
10 -9 -3 -0.29 0.45  
-10 -9 3 0.63 0.44  
-10 9 3 -0.18 0.40  
10 9 -3 0.11 0.38  
-9 -9 3 0.38 0.47  
9 -9 -3 0.29 0.45  
-9 -9 3 -0.38 0.33  
9 9 -3 -0.15 0.33  
-9 9 3 0.10 0.37

|    |    |    |       |      |
|----|----|----|-------|------|
| 8  | -9 | -3 | -0.06 | 0.40 |
| -8 | -9 | 3  | 0.22  | 0.44 |
| -8 | -9 | 3  | -0.02 | 0.34 |
| -8 | 9  | 3  | -0.04 | 0.34 |
| 8  | 9  | -3 | -0.03 | 0.36 |
| 7  | -9 | -3 | 0.88  | 0.42 |
| -7 | -9 | 3  | 0.89  | 0.34 |
| 7  | -9 | -3 | 0.90  | 0.52 |
| -7 | -9 | 3  | 0.64  | 0.46 |
| 7  | 9  | -3 | 1.01  | 0.35 |
| -7 | 9  | 3  | 1.40  | 0.33 |
| -7 | 9  | 3  | 0.87  | 0.35 |
| 6  | -9 | -3 | 1.73  | 0.36 |
| -6 | -9 | 3  | 1.90  | 0.51 |
| -6 | -9 | 3  | 1.93  | 0.37 |
| 6  | -9 | -3 | 2.30  | 0.46 |
| -6 | 9  | 3  | 1.61  | 0.35 |
| -6 | 9  | 3  | 2.88  | 0.38 |
| 6  | 9  | -3 | 1.78  | 0.39 |
| -5 | -9 | 3  | 15.35 | 0.72 |
| 5  | -9 | -3 | 15.52 | 0.80 |
| 5  | -9 | -3 | 14.89 | 0.71 |
| -5 | -9 | 3  | 16.00 | 0.88 |
| -5 | 9  | 3  | 15.18 | 0.71 |
| 5  | 9  | -3 | 16.46 | 0.74 |
| 4  | -9 | -3 | 10.10 | 0.63 |
| -4 | -9 | 3  | 9.24  | 0.69 |
| -4 | -9 | 3  | 9.35  | 0.59 |
| 4  | -9 | -3 | 8.61  | 0.65 |
| -4 | 9  | 3  | 9.17  | 0.54 |
| -4 | 9  | 3  | 10.53 | 0.78 |
| -4 | 9  | 3  | 10.08 | 0.58 |
| 4  | 9  | -3 | 9.23  | 0.59 |
| 3  | -9 | -3 | 5.51  | 0.55 |
| -3 | -9 | 3  | 5.01  | 0.55 |
| -3 | -9 | 3  | 6.28  | 0.52 |
| 3  | 9  | -3 | 6.54  | 0.53 |
| -3 | 9  | 3  | 6.01  | 0.42 |
| -3 | 9  | 3  | 6.06  | 0.50 |
| -3 | 9  | 3  | 5.99  | 0.61 |
| -2 | -9 | 3  | 18.46 | 0.78 |
| 2  | -9 | -3 | 18.94 | 0.89 |
| -2 | -9 | 3  | 16.81 | 0.84 |
| -2 | 9  | 3  | 18.66 | 0.64 |
| 2  | 9  | -3 | 19.11 | 0.79 |
| -2 | 9  | 3  | 18.61 | 0.89 |

|    |    |    |       |      |
|----|----|----|-------|------|
| -2 | 9  | 3  | 18.72 | 0.76 |
| 1  | -9 | -3 | 22.63 | 0.99 |
| 1  | -9 | -3 | 22.40 | 0.84 |
| 1  | -9 | -3 | 20.67 | 0.96 |
| -1 | -9 | 3  | 19.66 | 0.94 |
| 1  | 9  | -3 | 20.48 | 0.82 |
| -1 | 9  | 3  | 20.82 | 0.82 |
| -1 | 9  | 3  | 21.44 | 0.72 |
| 1  | 9  | -3 | 20.85 | 0.78 |
| -1 | 9  | 3  | 21.14 | 0.91 |
| 0  | -9 | -3 | 6.14  | 0.65 |
| 0  | -9 | -3 | 4.29  | 0.50 |
| 0  | -9 | 3  | 3.40  | 0.47 |
| 0  | -9 | -3 | 3.65  | 0.43 |
| 0  | -9 | -3 | 4.34  | 0.45 |
| 0  | 9  | 3  | 3.64  | 0.44 |
| 0  | 9  | -3 | 3.77  | 0.39 |
| 0  | 9  | -3 | 4.52  | 0.46 |
| 1  | -9 | 3  | 4.64  | 0.51 |
| -1 | -9 | -3 | 4.77  | 0.52 |
| -1 | -9 | -3 | 6.58  | 0.68 |
| -1 | -9 | -3 | 5.44  | 0.48 |
| 1  | 9  | 3  | 4.46  | 0.46 |
| -1 | 9  | -3 | 5.44  | 0.51 |
| -1 | 9  | -3 | 6.19  | 0.45 |
| 2  | -9 | 3  | 7.34  | 0.61 |
| -2 | -9 | -3 | 6.59  | 0.63 |
| -2 | -9 | -3 | 7.55  | 0.58 |
| -2 | -9 | -3 | 6.96  | 0.59 |
| 2  | 9  | 3  | 7.42  | 0.56 |
| -2 | 9  | -3 | 7.68  | 0.60 |
| 2  | 9  | 3  | 7.53  | 0.54 |
| -2 | 9  | -3 | 7.67  | 0.48 |
| -3 | -9 | -3 | 4.84  | 0.51 |
| -3 | -9 | -3 | 5.00  | 0.58 |
| -3 | -9 | -3 | 4.44  | 0.52 |
| 3  | -9 | 3  | 4.92  | 0.51 |
| -3 | 9  | -3 | 5.17  | 0.40 |
| 3  | 9  | 3  | 4.67  | 0.47 |
| -3 | 9  | -3 | 5.44  | 0.51 |
| 3  | 9  | 3  | 6.02  | 0.50 |
| -4 | -9 | -3 | 5.48  | 0.66 |
| 4  | -9 | 3  | 4.74  | 0.51 |
| 4  | -9 | 3  | 6.23  | 0.55 |
| 4  | 9  | 3  | 5.61  | 0.52 |
| 4  | 9  | 3  | 5.10  | 0.50 |



-4 9 -3 4.58 0.53  
5 -9 3 3.16 0.49  
5 -9 3 4.69 0.47  
-5 -9 -3 2.99 0.54  
5 9 3 3.10 0.42  
5 9 3 3.22 0.46  
-5 9 -3 4.00 0.54  
-6 -9 -3 -0.04 0.41  
6 -9 3 0.17 0.32  
6 9 3 -0.34 0.36  
6 9 3 0.01 0.33  
-6 9 -3 -0.21 0.35  
7 -9 3 0.47 0.41  
7 -9 3 -0.07 0.35  
-7 -9 -3 0.30 0.44  
7 9 3 0.35 0.32  
7 9 3 0.88 0.43  
-7 9 -3 0.67 0.39  
-8 -9 -3 -0.10 0.53  
8 -9 3 0.30 0.42  
8 -9 3 0.90 0.46  
8 9 3 0.38 0.39  
-8 9 -3 0.43 0.47  
9 -9 3 0.59 0.46  
-9 -9 -3 -0.54 0.56  
9 -9 3 0.00 0.46  
-9 9 -3 0.26 0.42  
10 -9 3 0.63 0.56  
-10 -9 -3 -0.67 0.60  
11 -10 -3 -0.31 0.50  
-11 10 3 -0.18 0.44  
11 10 -3 0.48 0.44  
10 -10 -3 0.81 0.51  
-10 10 3 0.35 0.40  
10 10 -3 -0.04 0.40  
-9 -10 3 -0.04 0.50  
9 -10 -3 0.34 0.48  
-9 -10 3 0.03 0.37  
9 10 -3 0.07 0.40  
-9 10 3 -0.49 0.36  
8 -10 -3 1.52 0.51  
-8 -10 3 1.48 0.41  
-8 -10 3 1.64 0.53  
-8 10 3 1.25 0.41  
8 10 -3 1.23 0.40  
-7 -10 3 -0.19 0.44

|    |     |    |       |      |
|----|-----|----|-------|------|
| -7 | -10 | 3  | -0.07 | 0.31 |
| 7  | -10 | -3 | 0.49  | 0.41 |
| 7  | 10  | -3 | -0.39 | 0.29 |
| -7 | 10  | 3  | -0.02 | 0.31 |
| -7 | 10  | 3  | 1.03  | 0.33 |
| 6  | -10 | -3 | 1.29  | 0.42 |
| 6  | -10 | -3 | 1.35  | 0.37 |
| -6 | -10 | 3  | 1.06  | 0.35 |
| -6 | -10 | 3  | 1.60  | 0.51 |
| -6 | 10  | 3  | 0.54  | 0.33 |
| 6  | 10  | -3 | 1.27  | 0.40 |
| -6 | 10  | 3  | 0.92  | 0.33 |
| 5  | -10 | -3 | 1.45  | 0.42 |
| -5 | -10 | 3  | 0.96  | 0.34 |
| 5  | -10 | -3 | 1.14  | 0.36 |
| -5 | -10 | 3  | 1.24  | 0.48 |
| 5  | 10  | -3 | 1.42  | 0.40 |
| -5 | 10  | 3  | 1.46  | 0.35 |
| 4  | -10 | -3 | 0.04  | 0.34 |
| -4 | -10 | 3  | 0.94  | 0.34 |
| -4 | -10 | 3  | 0.17  | 0.44 |
| -4 | 10  | 3  | 0.01  | 0.26 |
| 4  | 10  | -3 | 0.26  | 0.31 |
| -4 | 10  | 3  | -0.06 | 0.30 |
| -3 | -10 | 3  | 1.05  | 0.42 |
| 3  | -10 | -3 | 0.93  | 0.40 |
| -3 | -10 | 3  | 1.41  | 0.35 |
| -3 | 10  | 3  | 1.64  | 0.29 |
| -3 | 10  | 3  | 1.02  | 0.39 |
| -3 | 10  | 3  | 0.88  | 0.38 |
| 3  | 10  | -3 | 0.30  | 0.32 |
| -2 | -10 | 3  | 5.10  | 0.49 |
| 2  | -10 | -3 | 5.08  | 0.58 |
| 2  | -10 | -3 | 6.31  | 0.55 |
| 2  | -10 | -3 | 6.11  | 0.61 |
| -2 | -10 | 3  | 4.66  | 0.54 |
| -2 | 10  | 3  | 6.37  | 0.53 |
| -2 | 10  | 3  | 5.26  | 0.55 |
| 2  | 10  | -3 | 5.13  | 0.48 |
| 1  | -10 | -3 | 4.29  | 0.53 |
| 1  | -10 | -3 | 4.11  | 0.57 |
| -1 | -10 | 3  | 3.55  | 0.50 |
| 1  | -10 | -3 | 5.73  | 0.51 |
| 1  | 10  | -3 | 4.99  | 0.50 |
| -1 | 10  | 3  | 4.88  | 0.53 |
| 1  | 10  | -3 | 5.16  | 0.50 |

|    |     |    |       |      |
|----|-----|----|-------|------|
| 0  | -10 | 3  | 0.40  | 0.40 |
| 0  | -10 | -3 | 0.43  | 0.31 |
| 0  | -10 | -3 | -0.37 | 0.43 |
| 0  | -10 | -3 | 0.77  | 0.36 |
| 0  | 10  | -3 | 0.38  | 0.31 |
| 0  | 10  | -3 | -0.01 | 0.30 |
| 0  | 10  | 3  | 0.04  | 0.35 |
| -1 | -10 | -3 | 13.88 | 0.86 |
| -1 | -10 | -3 | 14.83 | 0.73 |
| 1  | -10 | 3  | 14.10 | 0.81 |
| 1  | 10  | 3  | 13.67 | 0.71 |
| -1 | 10  | -3 | 15.30 | 0.68 |
| -1 | 10  | -3 | 13.49 | 0.70 |
| 2  | -10 | 3  | 0.97  | 0.40 |
| -2 | -10 | -3 | 1.15  | 0.46 |
| 2  | 10  | 3  | 0.87  | 0.35 |
| -2 | 10  | -3 | 0.69  | 0.31 |
| 2  | 10  | 3  | 0.68  | 0.34 |
| -2 | 10  | -3 | 0.68  | 0.31 |
| -3 | -10 | -3 | 1.21  | 0.49 |
| 3  | -10 | 3  | 0.82  | 0.37 |
| 3  | 10  | 3  | 1.68  | 0.41 |
| 3  | 10  | 3  | 0.33  | 0.34 |
| -3 | 10  | -3 | 0.72  | 0.36 |
| 4  | -10 | 3  | 1.79  | 0.44 |
| -4 | -10 | -3 | 1.35  | 0.48 |
| 4  | 10  | 3  | 1.85  | 0.39 |
| -4 | 10  | -3 | 1.31  | 0.41 |
| 4  | 10  | 3  | 2.03  | 0.46 |
| -5 | -10 | -3 | 1.07  | 0.53 |
| 5  | -10 | 3  | 0.57  | 0.40 |
| 5  | 10  | 3  | 0.30  | 0.36 |
| -5 | 10  | -3 | 0.80  | 0.38 |
| -6 | -10 | -3 | -0.84 | 0.45 |
| 6  | -10 | 3  | 0.02  | 0.39 |
| 6  | 10  | 3  | 0.10  | 0.32 |
| -6 | 10  | -3 | 0.35  | 0.41 |
| 7  | -10 | 3  | -0.05 | 0.41 |
| -7 | -10 | -3 | -0.84 | 0.44 |
| 7  | 10  | 3  | -0.17 | 0.37 |
| -7 | 10  | -3 | -0.10 | 0.36 |
| 8  | -10 | 3  | 0.09  | 0.44 |
| -8 | -10 | -3 | -0.21 | 0.60 |
| 8  | 10  | 3  | 0.27  | 0.36 |
| -8 | 10  | -3 | -0.55 | 0.44 |
| 9  | -10 | 3  | 1.47  | 0.53 |

-9 -10 -3 0.62 0.58  
-9 10 -3 0.70 0.52  
11 -11 -3 0.25 0.57  
10 -11 -3 0.51 0.56  
-10 11 3 -0.22 0.46  
10 11 -3 0.78 0.47  
9 -11 -3 -0.37 0.47  
-9 -11 3 0.69 0.57  
-9 11 3 0.02 0.43  
9 11 -3 0.13 0.41  
-8 -11 3 0.43 0.53  
8 -11 -3 0.76 0.47  
8 11 -3 0.38 0.43  
-8 11 3 0.79 0.43  
-7 -11 3 1.58 0.56  
7 -11 -3 1.48 0.47  
-7 -11 3 1.60 0.41  
7 11 -3 1.20 0.41  
-7 11 3 1.60 0.43  
-6 -11 3 0.17 0.33  
-6 -11 3 0.14 0.41  
6 -11 -3 0.45 0.35  
6 -11 -3 -0.03 0.40  
-6 11 3 0.10 0.32  
6 11 -3 0.01 0.32  
-6 11 3 0.36 0.30  
5 -11 -3 2.41 0.44  
-5 -11 3 1.03 0.37  
-5 -11 3 1.40 0.51  
5 -11 -3 2.06 0.60  
5 11 -3 1.21 0.43  
-5 11 3 2.15 0.43  
-4 -11 3 0.43 0.30  
4 -11 -3 0.57 0.38  
-4 -11 3 0.67 0.48  
4 11 -3 0.05 0.32  
-4 11 3 0.27 0.37  
-3 -11 3 4.31 0.49  
3 -11 -3 5.72 0.57  
-3 -11 3 4.26 0.57  
3 -11 -3 4.66 0.55  
3 11 -3 2.69 0.44  
-3 11 3 5.75 0.57  
-2 -11 3 1.62 0.50  
2 -11 -3 2.14 0.44  
2 -11 -3 1.78 0.45

|    |     |    |       |      |
|----|-----|----|-------|------|
| -2 | 11  | 3  | 1.80  | 0.44 |
| 2  | 11  | -3 | 1.41  | 0.38 |
| 2  | 11  | -3 | 1.26  | 0.37 |
| 1  | -11 | -3 | 2.57  | 0.48 |
| 1  | -11 | -3 | 2.88  | 0.55 |
| -1 | -11 | 3  | 1.61  | 0.49 |
| -1 | 11  | 3  | 2.34  | 0.43 |
| 1  | 11  | -3 | 1.97  | 0.40 |
| 1  | 11  | -3 | 2.45  | 0.41 |
| 0  | -11 | -3 | 3.15  | 0.60 |
| 0  | -11 | 3  | 3.44  | 0.55 |
| 0  | 11  | 3  | 3.77  | 0.50 |
| 0  | 11  | -3 | 2.82  | 0.41 |
| 0  | 11  | -3 | 3.51  | 0.48 |
| 1  | -11 | 3  | 3.34  | 0.51 |
| -1 | -11 | -3 | 3.88  | 0.63 |
| 1  | 11  | 3  | 3.94  | 0.48 |
| -1 | 11  | -3 | 3.77  | 0.45 |
| -1 | 11  | -3 | 4.62  | 0.52 |
| 2  | -11 | 3  | 1.69  | 0.43 |
| -2 | -11 | -3 | 1.81  | 0.58 |
| -2 | 11  | -3 | 2.15  | 0.41 |
| 2  | 11  | 3  | 3.26  | 0.49 |
| -2 | 11  | -3 | 2.46  | 0.39 |
| 3  | -11 | 3  | 0.49  | 0.36 |
| -3 | -11 | -3 | 1.19  | 0.51 |
| -3 | 11  | -3 | 1.76  | 0.42 |
| 3  | 11  | 3  | 0.67  | 0.35 |
| -4 | -11 | -3 | 0.66  | 0.53 |
| 4  | -11 | 3  | 1.41  | 0.46 |
| 4  | 11  | 3  | 1.61  | 0.40 |
| -4 | 11  | -3 | 1.10  | 0.38 |
| -5 | -11 | -3 | -0.36 | 0.51 |
| 5  | -11 | 3  | 0.69  | 0.41 |
| -5 | 11  | -3 | 0.13  | 0.34 |
| 5  | 11  | 3  | 0.74  | 0.39 |
| -6 | -11 | -3 | -0.34 | 0.46 |
| 6  | -11 | 3  | 0.13  | 0.40 |
| 6  | 11  | 3  | 0.10  | 0.34 |
| -6 | 11  | -3 | -0.13 | 0.39 |
| -7 | -11 | -3 | -0.34 | 0.59 |
| 7  | -11 | 3  | 0.60  | 0.46 |
| -7 | 11  | -3 | -0.04 | 0.42 |
| 7  | 11  | 3  | -0.40 | 0.39 |
| 8  | -11 | 3  | 0.75  | 0.49 |
| -8 | -11 | -3 | 0.36  | 0.63 |

|     |     |    |       |      |
|-----|-----|----|-------|------|
| 8   | 11  | 3  | -0.05 | 0.41 |
| -8  | 11  | -3 | 0.49  | 0.49 |
| 10  | -12 | -3 | 0.67  | 0.58 |
| -10 | 12  | 3  | 0.31  | 0.49 |
| 9   | -12 | -3 | 0.78  | 0.55 |
| -9  | -12 | 3  | 0.39  | 0.57 |
| 9   | 12  | -3 | 0.61  | 0.47 |
| -9  | 12  | 3  | 0.08  | 0.46 |
| 8   | -12 | -3 | 0.18  | 0.51 |
| -8  | -12 | 3  | 0.43  | 0.56 |
| 8   | 12  | -3 | 0.97  | 0.47 |
| -8  | 12  | 3  | -0.24 | 0.41 |
| 7   | -12 | -3 | 0.15  | 0.44 |
| -7  | -12 | 3  | 0.74  | 0.52 |
| 7   | 12  | -3 | -0.18 | 0.44 |
| -7  | 12  | 3  | -0.19 | 0.37 |
| -6  | -12 | 3  | 0.68  | 0.53 |
| -6  | -12 | 3  | 0.52  | 0.59 |
| 6   | -12 | -3 | 1.05  | 0.41 |
| 6   | -12 | -3 | 1.48  | 0.77 |
| 6   | 12  | -3 | 1.52  | 0.45 |
| -6  | 12  | 3  | 1.41  | 0.43 |
| -5  | -12 | 3  | 0.38  | 0.33 |
| 5   | -12 | -3 | -0.36 | 0.32 |
| -5  | -12 | 3  | -0.15 | 0.41 |
| 5   | 12  | -3 | -0.08 | 0.36 |
| -5  | 12  | 3  | 0.25  | 0.36 |
| 4   | -12 | -3 | 0.41  | 0.38 |
| -4  | -12 | 3  | 0.61  | 0.34 |
| -4  | -12 | 3  | 0.62  | 0.48 |
| 4   | 12  | -3 | 0.16  | 0.42 |
| -4  | 12  | 3  | 0.17  | 0.38 |
| -3  | -12 | 3  | 0.37  | 0.47 |
| 3   | -12 | -3 | -0.39 | 0.38 |
| 3   | 12  | -3 | 0.32  | 0.37 |
| -3  | 12  | 3  | -0.67 | 0.35 |
| -2  | -12 | 3  | 1.30  | 0.45 |
| 2   | -12 | -3 | 1.17  | 0.46 |
| -2  | 12  | 3  | 1.99  | 0.43 |
| 2   | 12  | -3 | 2.01  | 0.48 |
| 2   | 12  | -3 | 1.67  | 0.40 |
| 1   | -12 | -3 | 0.66  | 0.43 |
| -1  | -12 | 3  | 0.79  | 0.48 |
| 1   | 12  | -3 | 1.65  | 0.40 |
| 1   | 12  | -3 | 1.38  | 0.43 |
| -1  | 12  | 3  | 0.91  | 0.38 |

|    |     |    |       |      |
|----|-----|----|-------|------|
| 0  | -12 | 3  | 0.45  | 0.40 |
| 0  | -12 | -3 | 0.66  | 0.50 |
| 0  | 12  | -3 | 0.71  | 0.38 |
| 0  | 12  | 3  | 0.54  | 0.42 |
| 0  | 12  | -3 | 0.64  | 0.33 |
| -1 | -12 | -3 | 0.44  | 0.46 |
| 1  | -12 | 3  | 0.60  | 0.45 |
| -1 | 12  | -3 | 0.33  | 0.33 |
| -1 | 12  | -3 | 0.36  | 0.34 |
| 1  | 12  | 3  | 0.57  | 0.40 |
| 2  | -12 | 3  | 1.42  | 0.42 |
| -2 | -12 | -3 | 1.23  | 0.56 |
| -2 | 12  | -3 | 1.18  | 0.41 |
| -2 | 12  | -3 | 0.62  | 0.35 |
| 2  | 12  | 3  | 1.35  | 0.44 |
| -3 | -12 | -3 | 0.53  | 0.54 |
| 3  | -12 | 3  | 0.05  | 0.41 |
| -3 | 12  | -3 | 0.06  | 0.37 |
| 3  | 12  | 3  | -0.25 | 0.32 |
| -4 | -12 | -3 | -0.11 | 0.48 |
| 4  | -12 | 3  | -0.57 | 0.40 |
| 4  | 12  | 3  | -0.13 | 0.33 |
| -4 | 12  | -3 | -0.03 | 0.34 |
| 5  | -12 | 3  | 0.21  | 0.43 |
| -5 | -12 | -3 | -0.86 | 0.50 |
| -5 | 12  | -3 | 0.28  | 0.42 |
| 5  | 12  | 3  | -0.14 | 0.34 |
| 6  | -12 | 3  | 0.35  | 0.44 |
| -6 | -12 | -3 | 0.23  | 0.64 |
| 6  | 12  | 3  | 0.52  | 0.44 |
| -6 | 12  | -3 | 0.22  | 0.46 |
| 7  | -12 | 3  | 0.03  | 0.48 |
| -7 | -12 | -3 | -0.81 | 0.53 |
| 7  | 12  | 3  | 0.37  | 0.44 |
| -7 | 12  | -3 | 0.48  | 0.43 |
| 8  | -12 | 3  | 0.99  | 0.52 |
| 8  | 12  | 3  | -0.05 | 0.38 |
| -9 | -13 | 3  | 0.80  | 0.64 |
| -8 | -13 | 3  | 0.55  | 0.61 |
| 8  | 13  | -3 | -0.14 | 0.45 |
| -7 | -13 | 3  | 0.12  | 0.49 |
| 7  | 13  | -3 | 1.01  | 0.48 |
| -6 | -13 | 3  | 1.23  | 0.56 |
| 6  | -13 | -3 | 0.56  | 0.47 |
| 6  | 13  | -3 | -0.12 | 0.42 |
| -6 | 13  | 3  | -0.06 | 0.50 |

|    |     |    |       |      |
|----|-----|----|-------|------|
| 5  | -13 | -3 | -0.03 | 0.41 |
| -5 | -13 | 3  | 0.19  | 0.50 |
| -5 | 13  | 3  | 0.06  | 0.41 |
| 5  | 13  | -3 | -0.34 | 0.37 |
| -4 | -13 | 3  | 0.16  | 0.44 |
| 4  | -13 | -3 | 0.99  | 0.45 |
| -4 | 13  | 3  | 0.66  | 0.44 |
| 4  | 13  | -3 | 0.71  | 0.43 |
| 3  | -13 | -3 | -0.19 | 0.40 |
| -3 | -13 | 3  | 0.19  | 0.47 |
| 3  | 13  | -3 | 0.03  | 0.36 |
| -3 | 13  | 3  | 0.48  | 0.43 |
| 3  | 13  | -3 | 0.31  | 0.44 |
| 2  | -13 | -3 | 1.41  | 0.49 |
| -2 | -13 | 3  | 1.19  | 0.47 |
| 2  | 13  | -3 | 1.03  | 0.38 |
| 2  | 13  | -3 | 0.82  | 0.40 |
| -2 | 13  | 3  | 0.37  | 0.39 |
| -1 | -13 | 3  | -0.01 | 0.40 |
| 1  | -13 | -3 | -0.56 | 0.44 |
| -1 | 13  | 3  | 0.32  | 0.38 |
| 1  | 13  | -3 | -0.05 | 0.36 |
| 1  | 13  | -3 | -0.19 | 0.40 |
| 0  | -13 | 3  | 1.83  | 0.53 |
| 0  | -13 | -3 | 1.18  | 0.53 |
| 0  | 13  | -3 | 1.73  | 0.45 |
| 0  | 13  | 3  | 0.66  | 0.43 |
| 0  | 13  | -3 | 1.51  | 0.46 |
| -1 | -13 | -3 | -0.20 | 0.49 |
| 1  | -13 | 3  | -0.01 | 0.39 |
| -1 | 13  | -3 | 0.01  | 0.37 |
| 1  | 13  | 3  | -0.01 | 0.42 |
| -1 | 13  | -3 | 0.45  | 0.39 |
| 2  | -13 | 3  | 0.16  | 0.43 |
| -2 | -13 | -3 | 0.31  | 0.55 |
| 2  | 13  | 3  | 0.55  | 0.44 |
| -2 | 13  | -3 | 0.08  | 0.37 |
| -3 | -13 | -3 | 0.96  | 0.56 |
| 3  | -13 | 3  | 0.11  | 0.45 |
| -3 | 13  | -3 | 0.92  | 0.44 |
| 3  | 13  | 3  | 0.48  | 0.45 |
| 4  | -13 | 3  | 1.12  | 0.51 |
| -4 | -13 | -3 | 0.38  | 0.55 |
| -4 | 13  | -3 | 1.04  | 0.47 |
| 4  | 13  | 3  | 0.42  | 0.46 |
| -5 | -13 | -3 | 0.28  | 0.58 |



|    |     |    |       |      |
|----|-----|----|-------|------|
| 5  | -13 | 3  | 0.72  | 0.44 |
| -5 | 13  | -3 | 0.56  | 0.48 |
| 5  | 13  | 3  | -0.09 | 0.37 |
| 6  | -13 | 3  | 1.27  | 0.48 |
| -6 | -13 | -3 | -1.19 | 0.63 |
| -6 | 13  | -3 | 0.38  | 0.43 |
| 6  | 13  | 3  | 0.04  | 0.45 |
| 7  | -13 | 3  | 0.80  | 0.50 |
| 7  | 13  | 3  | 0.62  | 0.44 |
| -8 | -14 | 3  | 0.35  | 0.61 |
| -7 | -14 | 3  | 0.48  | 0.59 |
| 7  | 14  | -3 | 0.28  | 0.48 |
| -6 | -14 | 3  | -0.15 | 0.55 |
| 6  | 14  | -3 | 0.34  | 0.51 |
| -5 | -14 | 3  | 0.32  | 0.57 |
| 5  | -14 | -3 | 0.53  | 0.46 |
| 5  | 14  | -3 | -0.10 | 0.43 |
| -5 | 14  | 3  | -0.19 | 0.42 |
| 4  | -14 | -3 | 0.04  | 0.43 |
| -4 | -14 | 3  | 0.52  | 0.49 |
| 4  | 14  | -3 | 0.47  | 0.50 |
| -4 | 14  | 3  | 0.08  | 0.46 |
| 3  | -14 | -3 | 0.79  | 0.49 |
| -3 | -14 | 3  | 0.46  | 0.55 |
| 3  | 14  | -3 | 0.19  | 0.49 |
| -3 | 14  | 3  | 0.68  | 0.47 |
| 2  | -14 | -3 | 0.26  | 0.43 |
| -2 | -14 | 3  | 0.56  | 0.53 |
| 2  | 14  | -3 | -0.02 | 0.40 |
| -2 | 14  | 3  | -0.23 | 0.40 |
| 1  | -14 | -3 | 1.43  | 0.56 |
| -1 | -14 | 3  | 1.07  | 0.54 |
| -1 | 14  | 3  | 1.06  | 0.50 |
| 1  | 14  | -3 | 0.75  | 0.42 |
| 1  | 14  | -3 | 0.41  | 0.46 |
| 0  | -14 | -3 | 0.47  | 0.48 |
| 0  | -14 | 3  | 0.50  | 0.45 |
| 0  | 14  | -3 | -0.18 | 0.36 |
| 0  | 14  | -3 | 0.30  | 0.44 |
| 0  | 14  | 3  | 0.17  | 0.43 |
| -1 | -14 | -3 | 0.00  | 0.54 |
| 1  | -14 | 3  | 0.93  | 0.52 |
| -1 | 14  | -3 | 0.04  | 0.39 |
| -1 | 14  | -3 | 0.50  | 0.44 |
| 1  | 14  | 3  | -0.13 | 0.48 |
| 2  | -14 | 3  | 0.62  | 0.43 |

-2 -14 -3 -0.65 0.54  
-2 14 -3 0.60 0.42  
2 14 3 -0.12 0.41  
-3 -14 -3 0.07 0.61  
3 -14 3 0.69 0.51  
-3 14 -3 1.03 0.46  
3 14 3 0.56 0.45  
-4 -14 -3 1.00 0.61  
4 -14 3 0.81 0.52  
4 14 3 1.11 0.48  
-4 14 -3 0.43 0.47  
-5 -14 -3 -0.19 0.64  
5 -14 3 0.95 0.51  
-5 14 -3 0.18 0.46  
5 14 3 -0.06 0.48  
6 -14 3 0.39 0.58  
5 -15 -3 0.37 0.48  
-5 -15 3 0.37 0.58  
-5 15 3 0.15 0.52  
5 15 -3 0.58 0.50  
-4 -15 3 0.06 0.50  
4 -15 -3 0.31 0.44  
4 15 -3 -0.64 0.47  
-4 15 3 0.43 0.50  
-3 -15 3 -0.26 0.46  
3 -15 -3 -0.23 0.45  
-3 15 3 0.30 0.50  
3 15 -3 -0.18 0.42  
-2 -15 3 0.19 0.56  
2 -15 -3 0.50 0.52  
2 15 -3 0.46 0.46  
-2 15 3 0.49 0.52  
-1 -15 3 0.56 0.55  
1 -15 -3 -0.16 0.52  
1 15 -3 0.24 0.50  
-1 15 3 0.75 0.51  
0 -15 -3 0.61 0.56  
0 -15 3 0.46 0.54  
0 15 3 0.15 0.46  
0 15 -3 -0.16 0.41  
1 -15 3 0.51 0.53  
-1 -15 -3 0.30 0.58  
-1 15 -3 0.44 0.49  
1 15 3 0.06 0.43  
2 -15 3 -0.40 0.47  
-2 -15 -3 -0.10 0.58

-2 15 -3 -0.59 0.42  
2 15 3 1.08 0.49  
-3 -15 -3 0.07 0.60  
3 -15 3 0.37 0.52  
-3 15 -3 0.32 0.49  
3 15 3 0.89 0.57  
-4 15 -3 0.78 0.49  
4 -16 -3 0.47 0.51  
-4 16 3 -0.08 0.50  
3 -16 -3 0.01 0.51  
-3 16 3 0.01 0.47  
2 -16 -3 0.40 0.55  
-2 16 3 -0.17 0.48  
2 16 -3 -0.35 0.45  
1 -16 -3 0.78 0.58  
-1 16 3 -0.42 0.51  
1 16 -3 0.20 0.48  
0 16 -3 0.73 0.54  
14 0 -4 0.05 0.49  
-14 0 4 0.42 0.50  
13 0 -4 1.37 0.53  
-13 0 4 1.65 0.47  
-12 0 4 0.31 0.35  
12 0 -4 0.19 0.40  
-11 0 4 0.15 0.37  
11 0 -4 0.23 0.40  
-10 0 4 8.50 0.66  
10 0 -4 10.14 0.72  
10 0 -4 9.16 0.55  
9 0 -4 0.31 0.38  
-9 0 4 0.21 0.34  
8 0 -4 4.31 0.50  
-8 0 4 2.33 0.48  
8 0 -4 3.64 0.35  
-8 0 4 3.33 0.42  
-7 0 4 4.29 0.43  
7 0 -4 4.40 0.42  
-7 0 4 3.49 0.23  
7 0 -4 3.44 0.44  
-7 0 4 3.51 0.49  
-6 0 4 55.99 1.45  
-6 0 4 57.88 1.32  
6 0 -4 59.41 1.48  
6 0 -4 58.94 1.64  
-6 0 4 59.77 1.70  
5 0 -4 2.22 0.34

-5 0 4 3.36 0.26  
5 0 -4 3.40 0.34  
-5 0 4 2.79 0.29  
-5 0 4 2.67 0.35  
-4 0 4 97.08 2.01  
-4 0 4 99.98 2.14  
4 0 -4 99.15 2.40  
4 0 -4 97.60 2.19  
-4 0 4 97.63 2.40  
-3 0 4 8.73 0.39  
3 0 -4 8.36 0.39  
3 0 -4 9.04 0.48  
-3 0 4 9.27 0.49  
-3 0 4 9.26 0.25  
-3 0 4 8.99 0.36  
-2 0 4 5.89 0.31  
-2 0 4 6.24 0.25  
2 0 -4 6.29 0.36  
-2 0 4 6.14 0.40  
-2 0 4 6.27 0.29  
2 0 -4 5.64 0.40  
-1 0 4 55.15 1.29  
1 0 -4 56.37 1.43  
1 0 -4 56.63 1.41  
-1 0 4 55.64 1.17  
0 0 -4 184.28 4.09  
0 0 4 181.08 3.80  
0 0 4 183.60 3.69  
0 0 4 184.67 3.77  
0 0 4 180.23 4.08  
1 0 4 82.34 1.60  
1 0 4 80.89 1.83  
-1 0 -4 80.22 1.99  
1 0 4 75.60 1.98  
1 0 4 81.58 1.81  
-1 0 -4 85.80 1.75  
2 0 4 32.58 0.88  
2 0 4 31.84 1.01  
-2 0 -4 31.24 0.81  
2 0 4 31.76 0.91  
-2 0 -4 31.45 1.00  
2 0 4 32.25 0.68  
-3 0 -4 25.48 0.72  
3 0 4 25.40 0.90  
3 0 4 24.66 0.55  
3 0 4 25.09 0.80

-3 0 -4 25.49 0.93  
-4 0 -4 0.81 0.23  
4 0 4 0.56 0.11  
-4 0 -4 0.11 0.22  
-4 0 -4 0.78 0.32  
4 0 4 0.78 0.32  
4 0 4 0.46 0.30  
4 0 4 0.44 0.28  
-5 0 -4 30.97 0.98  
5 0 4 30.68 1.01  
5 0 4 31.23 1.05  
-5 0 -4 31.96 1.21  
-5 0 -4 31.51 0.94  
6 0 4 8.74 0.62  
-6 0 -4 8.33 0.52  
6 0 4 7.38 0.60  
-6 0 -4 8.05 0.57  
7 0 4 1.33 0.40  
-7 0 -4 1.69 0.38  
-7 0 -4 1.45 0.33  
-8 0 -4 1.47 0.41  
8 0 4 1.59 0.39  
-8 0 -4 2.48 0.40  
9 0 4 0.39 0.40  
-9 0 -4 0.60 0.32  
-9 0 -4 -0.06 0.36  
-10 0 -4 0.18 0.41  
-10 0 -4 -0.04 0.38  
10 0 4 0.63 0.44  
-11 0 -4 -0.49 0.37  
11 0 4 -0.05 0.47  
-11 0 -4 0.03 0.45  
-12 0 -4 -0.54 0.62  
14 -1 -4 0.26 0.51  
-14 -1 4 0.70 0.51  
14 1 -4 0.89 0.51  
-14 1 4 -0.01 0.48  
-13 -1 4 0.14 0.44  
13 -1 -4 -0.13 0.42  
-13 1 4 -0.43 0.36  
13 1 -4 -0.05 0.45  
12 -1 -4 0.39 0.43  
-12 -1 4 -0.26 0.37  
-12 1 4 0.50 0.40  
12 1 -4 -0.01 0.40  
-11 -1 4 0.39 0.34

|     |    |    |       |      |
|-----|----|----|-------|------|
| 11  | -1 | -4 | -0.26 | 0.37 |
| 11  | 1  | -4 | 0.33  | 0.31 |
| -11 | 1  | 4  | 0.28  | 0.36 |
| 11  | 1  | -4 | 0.50  | 0.40 |
| 10  | -1 | -4 | 1.43  | 0.40 |
| -10 | -1 | 4  | 1.34  | 0.41 |
| 10  | -1 | -4 | 0.92  | 0.29 |
| -10 | 1  | 4  | 1.21  | 0.38 |
| 10  | 1  | -4 | 1.44  | 0.43 |
| -9  | -1 | 4  | 3.73  | 0.45 |
| 9   | -1 | -4 | 4.13  | 0.50 |
| -9  | 1  | 4  | 3.74  | 0.47 |
| 9   | 1  | -4 | 4.72  | 0.49 |
| 9   | 1  | -4 | 5.57  | 0.45 |
| 8   | -1 | -4 | 0.36  | 0.38 |
| -8  | -1 | 4  | 0.60  | 0.31 |
| -8  | -1 | 4  | 0.90  | 0.40 |
| 8   | 1  | -4 | 0.31  | 0.35 |
| -8  | 1  | 4  | 0.48  | 0.25 |
| -8  | 1  | 4  | 1.04  | 0.34 |
| 8   | 1  | -4 | 0.54  | 0.34 |
| 8   | 1  | -4 | 0.30  | 0.23 |
| 7   | -1 | -4 | 0.52  | 0.35 |
| -7  | -1 | 4  | 0.33  | 0.18 |
| -7  | -1 | 4  | 0.38  | 0.34 |
| -7  | -1 | 4  | 0.07  | 0.26 |
| 7   | -1 | -4 | 0.30  | 0.35 |
| -7  | 1  | 4  | 0.31  | 0.27 |
| 7   | 1  | -4 | 0.30  | 0.30 |
| -7  | 1  | 4  | 0.45  | 0.20 |
| 7   | 1  | -4 | 0.41  | 0.31 |
| -7  | 1  | 4  | 0.34  | 0.34 |
| 7   | 1  | -4 | 0.25  | 0.25 |
| 6   | -1 | -4 | 2.11  | 0.39 |
| 6   | -1 | -4 | 1.47  | 0.34 |
| -6  | -1 | 4  | 1.89  | 0.18 |
| -6  | -1 | 4  | 1.33  | 0.34 |
| -6  | -1 | 4  | 1.82  | 0.32 |
| 6   | 1  | -4 | 1.44  | 0.32 |
| 6   | 1  | -4 | 1.80  | 0.31 |
| -6  | 1  | 4  | 1.74  | 0.28 |
| -6  | 1  | 4  | 1.80  | 0.39 |
| -6  | 1  | 4  | 2.15  | 0.24 |
| 6   | 1  | -4 | 1.87  | 0.28 |
| 5   | -1 | -4 | 38.61 | 1.19 |
| -5  | -1 | 4  | 37.03 | 1.15 |

|    |    |    |        |      |
|----|----|----|--------|------|
| -5 | -1 | 4  | 36.53  | 1.00 |
| -5 | -1 | 4  | 37.07  | 0.81 |
| 5  | -1 | -4 | 38.22  | 1.06 |
| 5  | 1  | -4 | 36.70  | 1.11 |
| -5 | 1  | 4  | 38.76  | 1.21 |
| 5  | 1  | -4 | 37.77  | 0.99 |
| -5 | 1  | 4  | 36.86  | 0.90 |
| -5 | 1  | 4  | 34.80  | 0.97 |
| 4  | -1 | -4 | 46.72  | 1.20 |
| -4 | -1 | 4  | 44.29  | 1.14 |
| -4 | -1 | 4  | 46.34  | 1.06 |
| -4 | -1 | 4  | 47.78  | 1.30 |
| -4 | -1 | 4  | 46.84  | 0.99 |
| 4  | -1 | -4 | 46.36  | 1.34 |
| -4 | 1  | 4  | 46.33  | 1.06 |
| -4 | 1  | 4  | 47.78  | 1.13 |
| 4  | 1  | -4 | 46.45  | 1.27 |
| 4  | 1  | -4 | 45.81  | 1.14 |
| -4 | 1  | 4  | 47.78  | 1.35 |
| -3 | -1 | 4  | 172.00 | 3.30 |
| -3 | -1 | 4  | 169.79 | 3.49 |
| -3 | -1 | 4  | 169.57 | 3.80 |
| 3  | -1 | -4 | 168.11 | 3.60 |
| -3 | -1 | 4  | 172.73 | 3.41 |
| 3  | -1 | -4 | 169.47 | 3.38 |
| 3  | -1 | -4 | 170.19 | 3.88 |
| -3 | 1  | 4  | 172.39 | 3.46 |
| 3  | 1  | -4 | 165.76 | 3.53 |
| 3  | 1  | -4 | 164.82 | 3.80 |
| -3 | 1  | 4  | 168.06 | 3.87 |
| -3 | 1  | 4  | 166.29 | 3.29 |
| -2 | -1 | 4  | 117.09 | 2.41 |
| -2 | -1 | 4  | 115.17 | 2.45 |
| 2  | -1 | -4 | 117.84 | 2.75 |
| -2 | -1 | 4  | 117.87 | 2.30 |
| -2 | -1 | 4  | 117.45 | 2.66 |
| 2  | -1 | -4 | 118.03 | 2.54 |
| 2  | -1 | -4 | 117.59 | 2.39 |
| 2  | 1  | -4 | 114.37 | 2.48 |
| 2  | 1  | -4 | 116.61 | 2.67 |
| -2 | 1  | 4  | 115.64 | 2.73 |
| -2 | 1  | 4  | 114.43 | 2.31 |
| -2 | 1  | 4  | 117.42 | 2.54 |
| -1 | -1 | 4  | 49.28  | 1.12 |
| 1  | -1 | -4 | 49.36  | 1.32 |
| 1  | -1 | -4 | 48.57  | 1.11 |

|    |    |    |        |      |
|----|----|----|--------|------|
| -1 | -1 | 4  | 50.45  | 1.05 |
| -1 | -1 | 4  | 49.22  | 1.13 |
| -1 | 1  | 4  | 48.35  | 1.18 |
| 1  | 1  | -4 | 49.18  | 1.26 |
| 1  | 1  | -4 | 48.61  | 1.24 |
| -1 | 1  | 4  | 48.90  | 1.31 |
| -1 | 1  | 4  | 49.12  | 1.07 |
| -1 | 1  | 4  | 51.02  | 1.07 |
| 0  | -1 | 4  | 119.08 | 2.80 |
| 0  | -1 | -4 | 124.79 | 2.87 |
| 0  | -1 | 4  | 125.08 | 2.56 |
| 0  | -1 | 4  | 121.33 | 2.61 |
| 0  | -1 | 4  | 120.10 | 2.59 |
| 0  | -1 | -4 | 126.45 | 2.60 |
| 0  | -1 | 4  | 123.39 | 2.37 |
| 0  | 1  | -4 | 122.51 | 2.81 |
| 0  | 1  | 4  | 123.40 | 2.64 |
| -1 | -1 | -4 | 23.98  | 0.79 |
| -1 | -1 | -4 | 21.99  | 0.66 |
| 1  | -1 | 4  | 23.70  | 0.52 |
| 1  | -1 | 4  | 23.34  | 0.77 |
| 1  | -1 | 4  | 23.35  | 0.68 |
| -1 | -1 | -4 | 22.63  | 0.57 |
| 1  | -1 | 4  | 23.29  | 0.67 |
| 1  | 1  | 4  | 21.83  | 0.68 |
| -1 | 1  | -4 | 24.47  | 0.66 |
| -1 | 1  | -4 | 24.53  | 0.77 |
| 1  | 1  | 4  | 22.85  | 0.79 |
| 1  | 1  | 4  | 22.80  | 0.56 |
| 1  | 1  | 4  | 23.55  | 0.70 |
| -2 | -1 | -4 | 104.01 | 2.18 |
| 2  | -1 | 4  | 104.14 | 1.98 |
| -2 | -1 | -4 | 106.53 | 2.55 |
| 2  | -1 | 4  | 101.80 | 2.29 |
| 2  | -1 | 4  | 103.30 | 2.32 |
| -2 | -1 | -4 | 108.58 | 2.32 |
| 2  | -1 | 4  | 103.18 | 2.51 |
| -2 | 1  | -4 | 104.39 | 2.25 |
| 2  | 1  | 4  | 104.55 | 2.04 |
| 2  | 1  | 4  | 107.34 | 2.26 |
| 2  | 1  | 4  | 101.75 | 2.33 |
| -2 | 1  | -4 | 104.57 | 2.53 |
| 2  | 1  | 4  | 100.12 | 2.53 |
| 3  | -1 | 4  | 18.97  | 0.78 |
| -3 | -1 | -4 | 20.31  | 0.82 |
| 3  | -1 | 4  | 20.16  | 0.71 |



|    |    |    |       |      |
|----|----|----|-------|------|
| 3  | -1 | 4  | 19.77 | 0.40 |
| 3  | -1 | 4  | 19.38 | 0.67 |
| -3 | -1 | -4 | 20.21 | 0.69 |
| -3 | -1 | -4 | 19.63 | 0.58 |
| 3  | 1  | 4  | 20.84 | 0.82 |
| 3  | 1  | 4  | 20.56 | 0.73 |
| 3  | 1  | 4  | 20.60 | 0.72 |
| -3 | 1  | -4 | 18.71 | 0.64 |
| 3  | 1  | 4  | 20.02 | 0.50 |
| -3 | 1  | -4 | 20.17 | 0.80 |
| -4 | -1 | -4 | 6.56  | 0.37 |
| -4 | -1 | -4 | 6.20  | 0.43 |
| 4  | -1 | 4  | 5.97  | 0.44 |
| 4  | -1 | 4  | 5.97  | 0.51 |
| -4 | -1 | -4 | 8.14  | 0.62 |
| 4  | -1 | 4  | 6.65  | 0.48 |
| 4  | 1  | 4  | 6.95  | 0.28 |
| 4  | 1  | 4  | 7.51  | 0.58 |
| -4 | 1  | -4 | 7.21  | 0.44 |
| -4 | 1  | -4 | 7.30  | 0.59 |
| 4  | 1  | 4  | 7.51  | 0.53 |
| 4  | 1  | 4  | 6.69  | 0.54 |
| 5  | -1 | 4  | 3.55  | 0.44 |
| -5 | -1 | -4 | 3.27  | 0.32 |
| -5 | -1 | -4 | 3.01  | 0.37 |
| -5 | -1 | -4 | 3.73  | 0.51 |
| 5  | -1 | 4  | 3.27  | 0.42 |
| 5  | 1  | 4  | 2.21  | 0.41 |
| 5  | 1  | 4  | 3.58  | 0.26 |
| -5 | 1  | -4 | 3.76  | 0.51 |
| -5 | 1  | -4 | 3.50  | 0.36 |
| -6 | -1 | -4 | 11.65 | 0.56 |
| 6  | -1 | 4  | 12.47 | 0.71 |
| 6  | -1 | 4  | 11.10 | 0.71 |
| -6 | -1 | -4 | 12.99 | 0.67 |
| -6 | 1  | -4 | 13.21 | 0.65 |
| -6 | 1  | -4 | 11.38 | 0.61 |
| 6  | 1  | 4  | 10.38 | 0.66 |
| 7  | -1 | 4  | 8.15  | 0.66 |
| 7  | -1 | 4  | 7.98  | 0.64 |
| -7 | -1 | -4 | 7.78  | 0.51 |
| -7 | -1 | -4 | 8.09  | 0.62 |
| 7  | 1  | 4  | 7.03  | 0.59 |
| -7 | 1  | -4 | 8.85  | 0.58 |
| -7 | 1  | -4 | 9.77  | 0.61 |
| -8 | -1 | -4 | 2.83  | 0.40 |

|     |    |    |       |      |
|-----|----|----|-------|------|
| 8   | -1 | 4  | 2.04  | 0.46 |
| 8   | -1 | 4  | 2.44  | 0.47 |
| -8  | -1 | -4 | 2.31  | 0.40 |
| -8  | 1  | -4 | 2.37  | 0.40 |
| -8  | 1  | -4 | 2.45  | 0.44 |
| 8   | 1  | 4  | 2.66  | 0.49 |
| 9   | -1 | 4  | 0.39  | 0.42 |
| -9  | -1 | -4 | 0.58  | 0.33 |
| -9  | -1 | -4 | 0.33  | 0.38 |
| -9  | 1  | -4 | 0.33  | 0.36 |
| 9   | 1  | 4  | 0.41  | 0.40 |
| -9  | 1  | -4 | 0.64  | 0.36 |
| -10 | -1 | -4 | 0.33  | 0.42 |
| -10 | -1 | -4 | -0.02 | 0.36 |
| 10  | -1 | 4  | 0.04  | 0.42 |
| -10 | 1  | -4 | 0.24  | 0.38 |
| -10 | 1  | -4 | 0.13  | 0.40 |
| 10  | 1  | 4  | 0.11  | 0.41 |
| 11  | -1 | 4  | 0.21  | 0.46 |
| -11 | -1 | -4 | -0.19 | 0.44 |
| -11 | -1 | -4 | -0.14 | 0.45 |
| 11  | 1  | 4  | 0.33  | 0.47 |
| -11 | 1  | -4 | 0.16  | 0.43 |
| -12 | 1  | -4 | 0.41  | 0.47 |
| -14 | -2 | 4  | -0.12 | 0.50 |
| 14  | -2 | -4 | 1.12  | 0.59 |
| 14  | 2  | -4 | 1.04  | 0.52 |
| -14 | 2  | 4  | 0.58  | 0.50 |
| -13 | -2 | 4  | -0.03 | 0.39 |
| 13  | -2 | -4 | 0.50  | 0.49 |
| 13  | 2  | -4 | 0.89  | 0.47 |
| -13 | 2  | 4  | 0.18  | 0.44 |
| -12 | -2 | 4  | 0.85  | 0.40 |
| 12  | -2 | -4 | 0.39  | 0.45 |
| 12  | 2  | -4 | 0.28  | 0.42 |
| -12 | 2  | 4  | 0.02  | 0.34 |
| 11  | -2 | -4 | 3.27  | 0.56 |
| -11 | -2 | 4  | 3.50  | 0.53 |
| 11  | 2  | -4 | 2.85  | 0.50 |
| -11 | 2  | 4  | 1.99  | 0.44 |
| 10  | -2 | -4 | 4.37  | 0.42 |
| 10  | -2 | -4 | 3.54  | 0.52 |
| -10 | -2 | 4  | 3.67  | 0.48 |
| -10 | 2  | 4  | 4.08  | 0.50 |
| 10  | 2  | -4 | 4.59  | 0.53 |
| 10  | 2  | -4 | 3.71  | 0.43 |

|    |    |    |      |      |
|----|----|----|------|------|
| 9  | -2 | -4 | 7.21 | 0.65 |
| -9 | -2 | 4  | 7.39 | 0.60 |
| 9  | 2  | -4 | 7.72 | 0.52 |
| -9 | 2  | 4  | 7.10 | 0.47 |
| -9 | 2  | 4  | 6.03 | 0.52 |
| 9  | 2  | -4 | 6.87 | 0.55 |
| 8  | -2 | -4 | 6.76 | 0.56 |
| -8 | -2 | 4  | 7.20 | 0.64 |
| -8 | -2 | 4  | 8.14 | 0.57 |
| 8  | 2  | -4 | 7.89 | 0.57 |
| -8 | 2  | 4  | 7.70 | 0.53 |
| 8  | 2  | -4 | 8.28 | 0.48 |
| -8 | 2  | 4  | 7.73 | 0.45 |
| 8  | 2  | -4 | 6.71 | 0.58 |
| -7 | -2 | 4  | 4.92 | 0.37 |
| 7  | -2 | -4 | 4.82 | 0.54 |
| 7  | -2 | -4 | 5.05 | 0.47 |
| -7 | -2 | 4  | 5.82 | 0.55 |
| -7 | -2 | 4  | 6.23 | 0.50 |
| 7  | 2  | -4 | 6.88 | 0.46 |
| -7 | 2  | 4  | 6.05 | 0.46 |
| -7 | 2  | 4  | 6.55 | 0.40 |
| 7  | 2  | -4 | 4.27 | 0.42 |
| -7 | 2  | 4  | 6.04 | 0.59 |
| 7  | 2  | -4 | 6.48 | 0.52 |
| 6  | -2 | -4 | 3.91 | 0.47 |
| -6 | -2 | 4  | 4.49 | 0.45 |
| 6  | -2 | -4 | 3.89 | 0.41 |
| -6 | -2 | 4  | 4.31 | 0.29 |
| -6 | -2 | 4  | 3.51 | 0.37 |
| 6  | 2  | -4 | 4.22 | 0.37 |
| 6  | 2  | -4 | 4.19 | 0.34 |
| -6 | 2  | 4  | 4.81 | 0.53 |
| -6 | 2  | 4  | 3.16 | 0.33 |
| 6  | 2  | -4 | 3.73 | 0.39 |
| -6 | 2  | 4  | 4.77 | 0.33 |
| 5  | -2 | -4 | 1.91 | 0.31 |
| 5  | -2 | -4 | 2.19 | 0.36 |
| -5 | -2 | 4  | 2.81 | 0.22 |
| -5 | -2 | 4  | 2.50 | 0.33 |
| -5 | -2 | 4  | 2.85 | 0.33 |
| -5 | 2  | 4  | 2.55 | 0.40 |
| 5  | 2  | -4 | 2.01 | 0.26 |
| 5  | 2  | -4 | 2.70 | 0.30 |
| 5  | 2  | -4 | 2.46 | 0.26 |
| -5 | 2  | 4  | 2.41 | 0.27 |

-5 2 4 2.48 0.24  
-4 -2 4 153.06 3.14  
4 -2 -4 154.34 3.07  
4 -2 -4 154.73 3.62  
-4 -2 4 155.88 3.50  
-4 -2 4 152.35 3.23  
4 -2 -4 154.18 3.34  
-4 2 4 153.73 3.03  
4 2 -4 149.98 3.21  
4 2 -4 152.52 3.46  
-4 2 4 154.09 3.63  
4 2 -4 153.61 3.06  
-4 2 4 152.24 3.19  
3 -2 -4 32.60 0.90  
3 -2 -4 31.40 1.02  
3 -2 -4 31.23 0.73  
-3 -2 4 31.48 0.86  
-3 -2 4 30.95 0.76  
-3 -2 4 31.80 0.89  
-3 2 4 31.67 0.78  
-3 2 4 32.36 1.02  
3 2 -4 33.36 0.80  
3 2 -4 32.87 0.89  
3 2 -4 30.74 0.79  
2 -2 -4 34.42 0.79  
2 -2 -4 34.12 1.04  
-2 -2 4 33.11 0.86  
2 -2 -4 34.14 0.93  
-2 -2 4 32.94 0.88  
2 2 -4 33.00 0.81  
-2 2 4 33.94 0.78  
-2 2 4 33.99 1.02  
2 2 -4 32.02 0.89  
-2 2 4 32.85 0.79  
1 -2 -4 137.80 3.18  
1 -2 -4 133.00 2.83  
-1 -2 4 136.85 2.85  
-1 -2 4 134.97 2.83  
-1 -2 4 133.53 2.84  
-1 2 4 136.26 2.68  
-1 2 4 135.91 3.16  
1 2 -4 136.35 3.03  
-1 2 4 138.84 2.72  
1 2 -4 135.93 2.66  
-1 2 4 135.34 2.92  
1 2 -4 139.66 3.05

|    |    |    |        |      |
|----|----|----|--------|------|
| 0  | -2 | -4 | 53.79  | 1.06 |
| 0  | -2 | 4  | 50.00  | 1.24 |
| 0  | -2 | 4  | 51.01  | 1.35 |
| 0  | -2 | 4  | 50.53  | 1.20 |
| 0  | -2 | -4 | 52.87  | 1.39 |
| 0  | -2 | -4 | 53.11  | 1.39 |
| 0  | -2 | -4 | 50.81  | 1.20 |
| 0  | -2 | 4  | 46.65  | 1.19 |
| 0  | 2  | -4 | 52.20  | 1.07 |
| 0  | 2  | 4  | 51.59  | 1.25 |
| 0  | 2  | -4 | 50.61  | 1.28 |
| 0  | 2  | 4  | 50.56  | 1.11 |
| -1 | -2 | -4 | 172.23 | 3.99 |
| 1  | -2 | 4  | 170.65 | 3.65 |
| -1 | -2 | -4 | 180.06 | 3.45 |
| 1  | -2 | 4  | 172.02 | 3.96 |
| 1  | -2 | 4  | 172.57 | 3.65 |
| -1 | -2 | -4 | 179.54 | 3.67 |
| -1 | 2  | -4 | 173.21 | 3.60 |
| 1  | 2  | 4  | 171.97 | 3.69 |
| -1 | 2  | -4 | 172.87 | 3.91 |
| 1  | 2  | 4  | 173.72 | 3.98 |
| -1 | 2  | -4 | 175.01 | 3.29 |
| 2  | -2 | 4  | 116.74 | 2.77 |
| 2  | -2 | 4  | 117.94 | 2.56 |
| -2 | -2 | -4 | 120.17 | 2.38 |
| -2 | -2 | -4 | 118.03 | 2.83 |
| -2 | -2 | -4 | 115.96 | 2.57 |
| 2  | -2 | 4  | 115.29 | 2.56 |
| -2 | 2  | -4 | 114.20 | 2.77 |
| 2  | 2  | 4  | 116.92 | 2.60 |
| -2 | 2  | -4 | 114.17 | 2.20 |
| 2  | 2  | 4  | 118.32 | 2.31 |
| -2 | 2  | -4 | 117.61 | 2.52 |
| 2  | 2  | 4  | 111.43 | 2.81 |
| 3  | -2 | 4  | 4.21   | 0.41 |
| 3  | -2 | 4  | 3.49   | 0.35 |
| -3 | -2 | -4 | 3.71   | 0.25 |
| -3 | -2 | -4 | 3.79   | 0.40 |
| 3  | -2 | 4  | 3.64   | 0.35 |
| -3 | -2 | -4 | 4.52   | 0.36 |
| 3  | 2  | 4  | 4.29   | 0.27 |
| -3 | 2  | -4 | 3.64   | 0.32 |
| -3 | 2  | -4 | 3.73   | 0.40 |
| 3  | 2  | 4  | 3.58   | 0.40 |
| 3  | 2  | 4  | 3.78   | 0.38 |

-4 -2 -4 7.20 0.49  
4 -2 4 6.34 0.48  
-4 -2 -4 5.39 0.54  
-4 -2 -4 6.02 0.33  
4 -2 4 5.62 0.51  
4 -2 4 6.17 0.48  
4 2 4 5.18 0.51  
-4 2 -4 5.38 0.50  
4 2 4 5.34 0.47  
-4 2 -4 5.93 0.45  
4 2 4 6.03 0.31  
5 -2 4 7.48 0.55  
-5 -2 -4 5.97 0.57  
-5 -2 -4 7.95 0.50  
-5 -2 -4 6.77 0.41  
5 -2 4 6.62 0.53  
-5 2 -4 7.56 0.52  
-5 2 -4 6.39 0.60  
5 2 4 6.96 0.34  
5 2 4 7.11 0.56  
6 -2 4 12.85 0.65  
-6 -2 -4 12.40 0.58  
6 -2 4 13.58 0.74  
-6 -2 -4 13.02 0.65  
6 2 4 12.41 0.73  
-6 2 -4 13.36 0.69  
7 -2 4 2.37 0.42  
-7 -2 -4 3.00 0.41  
-7 -2 -4 3.59 0.40  
7 2 4 3.81 0.49  
-7 2 -4 2.77 0.42  
8 -2 4 6.41 0.64  
-8 -2 -4 6.64 0.61  
8 -2 4 7.87 0.67  
-8 -2 -4 6.90 0.53  
-8 2 -4 7.51 0.61  
8 2 4 4.71 0.54  
-8 2 -4 7.08 0.60  
9 -2 4 1.68 0.50  
-9 -2 -4 1.03 0.35  
-9 -2 -4 1.49 0.44  
9 -2 4 2.05 0.48  
-9 2 -4 1.45 0.42  
9 2 4 1.20 0.44  
-9 2 -4 1.56 0.42  
-10 -2 -4 -0.49 0.38

10 -2 4 0.93 0.48  
-10 2 -4 0.32 0.39  
10 2 4 0.05 0.38  
-10 2 -4 0.34 0.39  
-11 -2 -4 0.93 0.50  
11 -2 4 0.71 0.51  
-11 2 -4 -0.16 0.41  
11 2 4 0.08 0.43  
-12 2 -4 0.44 0.52  
14 -3 -4 -0.03 0.90  
-14 -3 4 0.41 0.51  
14 3 -4 0.50 0.51  
-13 -3 4 0.37 0.46  
13 -3 -4 0.08 0.49  
13 3 -4 0.27 0.45  
-13 3 4 0.36 0.40  
12 -3 -4 0.07 0.44  
-12 -3 4 0.44 0.43  
12 3 -4 -0.32 0.37  
-12 3 4 -0.15 0.33  
11 -3 -4 0.44 0.43  
-11 -3 4 0.31 0.39  
11 3 -4 1.23 0.36  
-11 3 4 0.30 0.33  
11 3 -4 0.56 0.40  
10 -3 -4 4.57 0.59  
-10 -3 4 5.53 0.54  
10 3 -4 3.68 0.43  
10 3 -4 6.15 0.57  
-10 3 4 4.57 0.53  
9 -3 -4 1.68 0.42  
-9 -3 4 1.58 0.37  
9 3 -4 2.10 0.37  
-9 3 4 1.99 0.30  
9 3 -4 1.66 0.37  
-9 3 4 1.84 0.38  
-8 -3 4 6.87 0.58  
-8 -3 4 6.77 0.61  
8 -3 -4 6.19 0.59  
-8 -3 4 6.55 0.46  
-8 3 4 6.48 0.43  
-8 3 4 6.48 0.53  
8 3 -4 6.08 0.56  
8 3 -4 6.58 0.51  
8 3 -4 7.32 0.52  
-7 -3 4 5.90 0.54

-7 -3 4 7.16 0.55  
-7 -3 4 6.09 0.42  
7 -3 -4 6.31 0.54  
-7 3 4 5.71 0.61  
-7 3 4 5.91 0.37  
7 3 -4 6.87 0.48  
-7 3 4 6.51 0.49  
7 3 -4 6.59 0.51  
7 3 -4 5.99 0.44  
-6 -3 4 1.81 0.34  
6 -3 -4 1.65 0.39  
-6 -3 4 1.62 0.33  
6 -3 -4 0.90 0.37  
-6 -3 4 1.34 0.26  
6 -3 -4 1.63 0.15  
-6 3 4 2.05 0.27  
6 3 -4 1.52 0.30  
-6 3 4 1.76 0.40  
6 3 -4 1.27 0.26  
6 3 -4 1.51 0.30  
-6 3 4 1.29 0.28  
5 -3 -4 9.01 0.62  
5 -3 -4 11.04 0.32  
5 -3 -4 11.33 0.57  
-5 -3 4 10.38 0.51  
-5 -3 4 10.29 0.53  
-5 -3 4 11.22 0.44  
5 3 -4 10.58 0.50  
5 3 -4 10.00 0.42  
-5 3 4 10.56 0.45  
-5 3 4 10.05 0.66  
-5 3 4 11.28 0.47  
5 3 -4 10.72 0.49  
4 -3 -4 35.17 1.15  
-4 -3 4 35.62 0.88  
4 -3 -4 34.51 0.80  
4 -3 -4 34.37 1.02  
-4 -3 4 33.12 0.96  
-4 -3 4 34.69 0.95  
4 3 -4 34.88 0.90  
-4 3 4 34.77 0.87  
-4 3 4 34.86 0.86  
4 3 -4 34.52 0.93  
-4 3 4 32.33 1.12  
4 3 -4 34.10 0.84  
-3 -3 4 126.10 2.69



|    |    |    |        |      |
|----|----|----|--------|------|
| 3  | -3 | -4 | 127.27 | 2.64 |
| 3  | -3 | -4 | 124.25 | 3.06 |
| 3  | -3 | -4 | 131.12 | 2.83 |
| -3 | -3 | 4  | 122.41 | 2.72 |
| -3 | -3 | 4  | 125.10 | 2.83 |
| -3 | 3  | 4  | 129.67 | 3.06 |
| 3  | 3  | -4 | 125.74 | 2.63 |
| 3  | 3  | -4 | 128.94 | 2.83 |
| -3 | 3  | 4  | 126.91 | 2.55 |
| -3 | 3  | 4  | 128.54 | 2.62 |
| -2 | -3 | 4  | 4.29   | 0.32 |
| 2  | -3 | -4 | 6.59   | 0.47 |
| -2 | -3 | 4  | 6.04   | 0.33 |
| 2  | -3 | -4 | 6.34   | 0.41 |
| 2  | -3 | -4 | 5.43   | 0.30 |
| 2  | 3  | -4 | 5.71   | 0.25 |
| 2  | 3  | -4 | 4.84   | 0.28 |
| -2 | 3  | 4  | 6.13   | 0.32 |
| -2 | 3  | 4  | 5.76   | 0.24 |
| 2  | 3  | -4 | 6.21   | 0.29 |
| -2 | 3  | 4  | 6.03   | 0.44 |
| 2  | 3  | -4 | 5.83   | 0.28 |
| 1  | -3 | -4 | 111.10 | 2.32 |
| -1 | -3 | 4  | 108.59 | 2.34 |
| -1 | -3 | 4  | 106.51 | 2.33 |
| -1 | -3 | 4  | 105.88 | 2.25 |
| 1  | -3 | -4 | 108.80 | 2.63 |
| -1 | 3  | 4  | 108.67 | 2.20 |
| -1 | 3  | 4  | 107.87 | 2.38 |
| -1 | 3  | 4  | 110.09 | 2.16 |
| 1  | 3  | -4 | 107.97 | 2.41 |
| 1  | 3  | -4 | 106.71 | 2.16 |
| 1  | 3  | -4 | 107.91 | 2.42 |
| -1 | 3  | 4  | 108.69 | 2.60 |
| 0  | -3 | 4  | 108.10 | 2.30 |
| 0  | -3 | 4  | 105.24 | 2.48 |
| 0  | -3 | -4 | 109.72 | 2.62 |
| 0  | -3 | 4  | 109.08 | 2.37 |
| 0  | -3 | -4 | 107.91 | 2.63 |
| 0  | -3 | 4  | 109.58 | 2.37 |
| 0  | -3 | -4 | 109.56 | 2.36 |
| 0  | 3  | 4  | 107.96 | 2.40 |
| 0  | 3  | -4 | 111.75 | 2.48 |
| 0  | 3  | -4 | 108.79 | 2.14 |
| 0  | 3  | 4  | 110.26 | 2.21 |
| 1  | -3 | 4  | 62.84  | 1.45 |

|    |    |    |       |      |
|----|----|----|-------|------|
| 1  | -3 | 4  | 60.35 | 1.59 |
| -1 | -3 | -4 | 65.49 | 1.25 |
| -1 | -3 | -4 | 63.18 | 1.67 |
| -1 | -3 | -4 | 62.22 | 1.48 |
| 1  | -3 | 4  | 62.09 | 1.48 |
| 1  | 3  | 4  | 64.07 | 1.51 |
| 1  | 3  | 4  | 60.23 | 1.34 |
| -1 | 3  | -4 | 63.16 | 1.56 |
| -1 | 3  | -4 | 60.53 | 1.47 |
| 1  | 3  | 4  | 62.05 | 1.65 |
| -1 | 3  | -4 | 61.19 | 1.26 |
| -2 | -3 | -4 | 19.59 | 0.77 |
| 2  | -3 | 4  | 18.51 | 0.70 |
| 2  | -3 | 4  | 17.65 | 0.61 |
| -2 | -3 | -4 | 18.34 | 0.64 |
| -2 | -3 | -4 | 18.04 | 0.45 |
| 2  | -3 | 4  | 18.86 | 0.64 |
| -2 | 3  | -4 | 18.42 | 0.70 |
| 2  | 3  | 4  | 18.18 | 0.75 |
| -2 | 3  | -4 | 17.48 | 0.41 |
| 2  | 3  | 4  | 18.45 | 0.65 |
| -2 | 3  | -4 | 15.49 | 0.61 |
| -3 | -3 | -4 | 0.59  | 0.25 |
| -3 | -3 | -4 | 0.66  | 0.29 |
| 3  | -3 | 4  | 0.23  | 0.29 |
| 3  | -3 | 4  | 0.63  | 0.28 |
| 3  | -3 | 4  | 0.57  | 0.25 |
| -3 | -3 | -4 | 0.73  | 0.15 |
| -3 | 3  | -4 | 0.54  | 0.23 |
| -3 | 3  | -4 | 0.76  | 0.28 |
| 3  | 3  | 4  | 0.73  | 0.30 |
| 3  | 3  | 4  | 0.58  | 0.30 |
| 3  | 3  | 4  | 0.42  | 0.18 |
| 4  | -3 | 4  | 23.55 | 0.84 |
| 4  | -3 | 4  | 23.34 | 0.94 |
| -4 | -3 | -4 | 22.43 | 0.81 |
| 4  | -3 | 4  | 22.57 | 0.84 |
| -4 | -3 | -4 | 24.08 | 0.68 |
| -4 | -3 | -4 | 22.75 | 0.99 |
| 4  | 3  | 4  | 24.81 | 0.99 |
| 4  | 3  | 4  | 22.60 | 0.87 |
| -4 | 3  | -4 | 26.87 | 0.87 |
| 4  | 3  | 4  | 25.16 | 0.68 |
| -4 | 3  | -4 | 23.76 | 0.95 |
| 5  | -3 | 4  | 1.98  | 0.40 |
| 5  | -3 | 4  | 1.36  | 0.37 |

-5 -3 -4 1.60 0.26  
-5 -3 -4 1.59 0.34  
5 3 4 1.96 0.25  
-5 3 -4 1.42 0.41  
5 3 4 0.96 0.38  
-5 3 -4 1.57 0.33  
-6 -3 -4 7.52 0.58  
6 -3 4 7.75 0.60  
6 -3 4 6.72 0.54  
-6 -3 -4 7.12 0.45  
-6 3 -4 6.52 0.53  
6 3 4 6.26 0.54  
7 -3 4 1.84 0.40  
7 -3 4 1.75 0.43  
-7 -3 -4 1.94 0.40  
-7 -3 -4 1.47 0.31  
7 3 4 0.99 0.37  
-7 3 -4 0.94 0.33  
8 -3 4 -0.47 0.35  
-8 -3 -4 0.23 0.29  
-8 -3 -4 -0.16 0.35  
-8 3 -4 -0.18 0.32  
8 3 4 0.18 0.36  
9 -3 4 1.36 0.47  
-9 -3 -4 0.53 0.42  
9 -3 4 0.89 0.46  
-9 3 -4 1.28 0.42  
-9 3 -4 1.10 0.39  
9 3 4 0.48 0.41  
10 -3 4 0.69 0.55  
-10 -3 -4 1.22 0.48  
10 -3 4 1.39 0.52  
-10 3 -4 2.02 0.50  
-10 3 -4 0.89 0.45  
10 3 4 1.17 0.52  
11 -3 4 0.31 0.50  
-11 -3 -4 -0.15 0.48  
-11 3 -4 0.13 0.45  
11 3 4 0.09 0.45  
-14 -4 4 0.37 0.51  
13 -4 -4 1.05 0.52  
-13 -4 4 0.42 0.50  
13 4 -4 -0.04 0.44  
-13 4 4 0.48 0.47  
12 -4 -4 0.50 0.42  
-12 -4 4 0.32 0.45

|     |    |    |       |      |
|-----|----|----|-------|------|
| 12  | 4  | -4 | -0.08 | 0.41 |
| -12 | 4  | 4  | 0.57  | 0.43 |
| 11  | -4 | -4 | 0.62  | 0.45 |
| -11 | -4 | 4  | 0.20  | 0.39 |
| 11  | 4  | -4 | 0.53  | 0.36 |
| 11  | 4  | -4 | 0.47  | 0.37 |
| -11 | 4  | 4  | 0.76  | 0.36 |
| 10  | -4 | -4 | 0.63  | 0.42 |
| -10 | -4 | 4  | 0.11  | 0.33 |
| 10  | 4  | -4 | 0.69  | 0.34 |
| 10  | 4  | -4 | 1.08  | 0.38 |
| -10 | 4  | 4  | 0.34  | 0.32 |
| 9   | -4 | -4 | 3.37  | 0.51 |
| -9  | -4 | 4  | 3.25  | 0.81 |
| -9  | -4 | 4  | 3.64  | 0.50 |
| -9  | 4  | 4  | 3.50  | 0.35 |
| 9   | 4  | -4 | 4.40  | 0.47 |
| -9  | 4  | 4  | 5.75  | 0.54 |
| 9   | 4  | -4 | 3.55  | 0.41 |
| 8   | -4 | -4 | 10.10 | 0.71 |
| -8  | -4 | 4  | 7.87  | 0.64 |
| -8  | -4 | 4  | 8.03  | 0.54 |
| -8  | -4 | 4  | 8.81  | 0.60 |
| 8   | 4  | -4 | 8.42  | 0.63 |
| 8   | 4  | -4 | 9.57  | 0.55 |
| -8  | 4  | 4  | 8.13  | 0.49 |
| -8  | 4  | 4  | 8.97  | 0.56 |
| 8   | 4  | -4 | 9.81  | 0.57 |
| -7  | -4 | 4  | 9.60  | 0.58 |
| 7   | -4 | -4 | 9.33  | 0.62 |
| -7  | -4 | 4  | 9.06  | 0.56 |
| -7  | -4 | 4  | 8.44  | 0.61 |
| 7   | 4  | -4 | 8.26  | 0.57 |
| -7  | 4  | 4  | 8.92  | 0.45 |
| 7   | 4  | -4 | 8.83  | 0.52 |
| 7   | 4  | -4 | 9.95  | 0.52 |
| -7  | 4  | 4  | 9.49  | 0.53 |
| -6  | -4 | 4  | 3.27  | 0.39 |
| 6   | -4 | -4 | 3.81  | 0.27 |
| 6   | -4 | -4 | 3.93  | 0.49 |
| -6  | -4 | 4  | 3.91  | 0.44 |
| -6  | -4 | 4  | 4.68  | 0.40 |
| 6   | -4 | -4 | 2.98  | 0.47 |
| 6   | 4  | -4 | 4.99  | 0.42 |
| 6   | 4  | -4 | 4.40  | 0.35 |
| 6   | 4  | -4 | 4.26  | 0.39 |

-6 4 4 4.12 0.38  
-6 4 4 4.51 0.34  
-6 4 4 4.18 0.55  
-5 -4 4 4.21 0.37  
-5 -4 4 4.48 0.36  
5 -4 -4 4.31 0.47  
-5 -4 4 4.56 0.40  
5 -4 -4 5.03 0.53  
5 -4 -4 4.34 0.28  
5 4 -4 4.80 0.32  
-5 4 4 4.91 0.36  
-5 4 4 4.22 0.34  
5 4 -4 4.20 0.33  
-5 4 4 6.25 0.58  
5 4 -4 4.27 0.36  
-4 -4 4 12.58 0.56  
-4 -4 4 11.88 0.52  
4 -4 -4 11.30 0.65  
4 -4 -4 11.71 0.57  
-4 -4 4 11.39 0.47  
4 -4 -4 10.97 0.42  
-4 4 4 11.25 0.67  
4 4 -4 11.24 0.42  
-4 4 4 12.13 0.45  
4 4 -4 11.48 0.37  
4 4 -4 11.34 0.47  
-3 -4 4 47.30 1.14  
3 -4 -4 47.90 1.30  
3 -4 -4 49.42 1.17  
-3 -4 4 48.10 1.23  
-3 -4 4 49.54 1.23  
3 -4 -4 48.71 1.46  
-3 4 4 47.98 1.14  
3 4 -4 48.74 1.04  
3 4 -4 49.08 1.13  
3 4 -4 49.94 1.15  
-3 4 4 49.38 1.11  
-3 4 4 48.69 1.44  
-2 -4 4 63.37 1.55  
2 -4 -4 66.85 1.63  
2 -4 -4 69.28 1.54  
-2 -4 4 67.03 1.55  
2 -4 -4 66.87 1.80  
-2 4 4 66.46 1.46  
2 4 -4 65.66 1.48  
2 4 -4 65.71 1.47

|    |    |    |       |      |
|----|----|----|-------|------|
| -2 | 4  | 4  | 66.83 | 1.40 |
| 2  | 4  | -4 | 66.66 | 1.44 |
| 2  | 4  | -4 | 64.34 | 1.38 |
| -2 | 4  | 4  | 65.72 | 1.76 |
| -1 | -4 | 4  | 11.19 | 0.33 |
| -1 | -4 | 4  | 11.78 | 0.52 |
| -1 | -4 | 4  | 11.57 | 0.47 |
| 1  | -4 | -4 | 11.01 | 0.59 |
| 1  | -4 | -4 | 10.68 | 0.46 |
| 1  | 4  | -4 | 11.37 | 0.37 |
| -1 | 4  | 4  | 12.21 | 0.29 |
| 1  | 4  | -4 | 10.87 | 0.37 |
| -1 | 4  | 4  | 10.80 | 0.48 |
| 1  | 4  | -4 | 11.32 | 0.41 |
| -1 | 4  | 4  | 11.20 | 0.57 |
| -1 | 4  | 4  | 10.89 | 0.44 |
| 0  | -4 | 4  | 55.81 | 1.45 |
| 0  | -4 | 4  | 59.90 | 1.46 |
| 0  | -4 | 4  | 61.24 | 1.46 |
| 0  | -4 | 4  | 59.60 | 1.34 |
| 0  | -4 | -4 | 61.42 | 1.66 |
| 0  | -4 | -4 | 63.74 | 1.64 |
| 0  | -4 | -4 | 61.59 | 1.46 |
| 0  | 4  | -4 | 60.31 | 1.28 |
| 0  | 4  | 4  | 61.17 | 1.36 |
| 0  | 4  | -4 | 60.57 | 1.45 |
| 0  | 4  | 4  | 62.74 | 1.49 |
| -1 | -4 | -4 | 0.98  | 0.25 |
| 1  | -4 | 4  | 0.99  | 0.21 |
| 1  | -4 | 4  | 0.79  | 0.24 |
| -1 | -4 | -4 | 0.86  | 0.26 |
| 1  | -4 | 4  | 0.88  | 0.18 |
| -1 | -4 | -4 | 0.86  | 0.23 |
| 1  | 4  | 4  | 0.93  | 0.20 |
| -1 | 4  | -4 | 1.05  | 0.14 |
| -1 | 4  | -4 | 1.11  | 0.26 |
| -1 | 4  | -4 | 0.90  | 0.20 |
| 1  | 4  | 4  | 1.36  | 0.28 |
| -2 | -4 | -4 | 16.81 | 0.75 |
| 2  | -4 | 4  | 17.72 | 0.65 |
| -2 | -4 | -4 | 17.11 | 0.40 |
| -2 | -4 | -4 | 17.12 | 0.64 |
| 2  | 4  | 4  | 15.99 | 0.77 |
| -2 | 4  | -4 | 16.60 | 0.43 |
| 2  | 4  | 4  | 16.68 | 0.57 |
| -2 | 4  | -4 | 17.29 | 0.66 |

|    |    |    |       |      |
|----|----|----|-------|------|
| -2 | 4  | -4 | 16.98 | 0.67 |
| 2  | 4  | 4  | 16.56 | 0.66 |
| 3  | -4 | 4  | 11.08 | 0.62 |
| -3 | -4 | -4 | 11.08 | 0.58 |
| 3  | -4 | 4  | 11.11 | 0.60 |
| -3 | -4 | -4 | 11.41 | 0.67 |
| 3  | -4 | 4  | 10.57 | 0.55 |
| -3 | -4 | -4 | 11.70 | 0.37 |
| 3  | 4  | 4  | 11.34 | 0.61 |
| -3 | 4  | -4 | 10.72 | 0.28 |
| 3  | 4  | 4  | 11.75 | 0.69 |
| -3 | 4  | -4 | 10.25 | 0.54 |
| -3 | 4  | -4 | 11.60 | 0.61 |
| 4  | -4 | 4  | 11.29 | 0.59 |
| -4 | -4 | -4 | 10.64 | 0.72 |
| -4 | -4 | -4 | 12.13 | 0.60 |
| 4  | -4 | 4  | 11.76 | 0.60 |
| 4  | -4 | 4  | 10.91 | 0.68 |
| -4 | -4 | -4 | 11.36 | 0.43 |
| 4  | 4  | 4  | 10.84 | 0.65 |
| 4  | 4  | 4  | 11.86 | 0.49 |
| -4 | 4  | -4 | 10.93 | 0.62 |
| 4  | 4  | 4  | 10.72 | 0.71 |
| -4 | 4  | -4 | 11.76 | 0.69 |
| -5 | -4 | -4 | 22.40 | 0.69 |
| 5  | -4 | 4  | 22.67 | 0.86 |
| 5  | -4 | 4  | 22.85 | 0.89 |
| -5 | -4 | -4 | 23.51 | 0.88 |
| 5  | 4  | 4  | 25.11 | 0.74 |
| -5 | 4  | -4 | 21.48 | 0.86 |
| -5 | 4  | -4 | 24.78 | 1.05 |
| 5  | 4  | 4  | 24.93 | 0.94 |
| 6  | -4 | 4  | 6.12  | 0.53 |
| -6 | -4 | -4 | 4.67  | 0.48 |
| 6  | -4 | 4  | 5.29  | 0.51 |
| -6 | -4 | -4 | 6.21  | 0.41 |
| -6 | 4  | -4 | 4.99  | 0.50 |
| 6  | 4  | 4  | 5.92  | 0.41 |
| 6  | 4  | 4  | 4.71  | 0.51 |
| 7  | -4 | 4  | 0.75  | 0.33 |
| 7  | -4 | 4  | 1.38  | 0.42 |
| -7 | -4 | -4 | 1.82  | 0.38 |
| 7  | 4  | 4  | 0.41  | 0.38 |
| -7 | 4  | -4 | 0.84  | 0.35 |
| 8  | -4 | 4  | 3.83  | 0.51 |
| 8  | -4 | 4  | 4.46  | 0.58 |

-8 -4 -4 3.68 0.54  
8 4 4 3.86 0.53  
-8 4 -4 4.29 0.55  
-9 -4 -4 0.32 0.39  
9 -4 4 0.59 0.41  
-9 4 -4 0.56 0.37  
9 4 4 0.68 0.43  
10 -4 4 0.44 0.48  
10 -4 4 -0.22 0.47  
-10 -4 -4 0.53 0.46  
10 4 4 -0.36 0.43  
-10 4 -4 0.47 0.41  
-10 4 -4 0.71 0.45  
-11 -4 -4 0.00 0.52  
11 -4 4 -0.45 0.47  
-11 4 -4 -0.07 0.39  
11 4 4 0.19 0.50  
13 -5 -4 0.30 0.48  
-13 -5 4 -0.16 0.45  
-13 5 4 0.04 0.41  
-12 -5 4 0.21 0.38  
12 -5 -4 0.04 0.47  
-12 5 4 -0.37 0.40  
12 5 -4 -0.09 0.35  
11 -5 -4 0.34 0.44  
-11 -5 4 -0.11 0.37  
-11 5 4 -0.21 0.36  
11 5 -4 -0.23 0.30  
11 5 -4 -0.02 0.36  
10 -5 -4 0.04 0.37  
-10 -5 4 0.05 0.36  
10 5 -4 0.57 0.35  
-10 5 4 0.60 0.37  
10 5 -4 -0.27 0.33  
-9 -5 4 3.75 0.47  
9 -5 -4 2.86 0.53  
-9 5 4 3.61 0.47  
-9 5 4 3.27 0.35  
9 5 -4 3.03 0.41  
9 5 -4 2.59 0.39  
8 -5 -4 1.42 0.39  
-8 -5 4 2.01 0.41  
-8 -5 4 0.91 0.37  
-8 -5 4 1.94 0.39  
8 5 -4 1.57 0.34  
8 5 -4 1.92 0.37



-8 5 4 1.55 0.29  
-8 5 4 1.98 0.38  
8 5 -4 2.85 0.37  
-7 -5 4 8.56 0.62  
-7 -5 4 10.60 0.66  
7 -5 -4 10.27 0.71  
-7 -5 4 9.34 0.61  
7 5 -4 10.52 0.52  
-7 5 4 10.34 0.52  
-7 5 4 9.60 0.57  
7 5 -4 10.58 0.61  
7 5 -4 9.99 0.59  
-6 -5 4 15.27 0.68  
-6 -5 4 15.23 0.69  
6 -5 -4 16.03 0.53  
6 -5 -4 15.97 0.79  
-6 -5 4 16.04 0.73  
6 -5 -4 15.38 0.96  
-6 5 4 16.10 0.91  
-6 5 4 15.03 0.61  
6 5 -4 15.65 0.57  
-6 5 4 14.77 0.62  
6 5 -4 15.74 0.64  
6 5 -4 15.80 0.64  
5 -5 -4 0.76 0.35  
5 -5 -4 0.30 0.35  
-5 -5 4 0.92 0.29  
5 -5 -4 0.72 0.22  
-5 -5 4 0.90 0.24  
-5 5 4 1.01 0.38  
-5 5 4 1.20 0.25  
5 5 -4 0.62 0.26  
-5 5 4 0.71 0.22  
5 5 -4 0.66 0.19  
5 5 -4 0.69 0.20  
4 -5 -4 12.94 0.67  
-4 -5 4 13.13 0.61  
-4 -5 4 13.28 0.46  
4 -5 -4 13.09 0.76  
-4 -5 4 13.44 0.58  
4 -5 -4 13.07 0.51  
4 5 -4 13.45 0.43  
-4 5 4 12.99 0.54  
-4 5 4 13.12 0.48  
-4 5 4 14.16 0.77  
4 5 -4 13.00 0.53

|    |    |    |       |      |
|----|----|----|-------|------|
| 4  | 5  | -4 | 12.62 | 0.38 |
| -3 | -5 | 4  | 0.27  | 0.23 |
| 3  | -5 | -4 | 0.75  | 0.25 |
| 3  | -5 | -4 | 0.46  | 0.26 |
| -3 | -5 | 4  | 0.50  | 0.23 |
| 3  | -5 | -4 | 0.21  | 0.27 |
| -3 | 5  | 4  | 0.38  | 0.20 |
| 3  | 5  | -4 | 0.11  | 0.19 |
| -3 | 5  | 4  | 0.38  | 0.28 |
| -3 | 5  | 4  | 0.41  | 0.14 |
| -2 | -5 | 4  | 15.43 | 0.60 |
| 2  | -5 | -4 | 15.28 | 0.64 |
| 2  | -5 | -4 | 15.95 | 0.62 |
| 2  | -5 | -4 | 14.77 | 0.73 |
| -2 | -5 | 4  | 15.53 | 0.59 |
| 2  | 5  | -4 | 15.76 | 0.53 |
| -2 | 5  | 4  | 15.89 | 0.72 |
| -2 | 5  | 4  | 15.17 | 0.55 |
| -2 | 5  | 4  | 15.44 | 0.43 |
| 1  | -5 | -4 | 16.98 | 0.74 |
| -1 | -5 | 4  | 15.62 | 0.39 |
| -1 | -5 | 4  | 15.78 | 0.63 |
| 1  | -5 | -4 | 16.33 | 0.62 |
| -1 | -5 | 4  | 15.23 | 0.60 |
| -1 | 5  | 4  | 16.05 | 0.56 |
| -1 | 5  | 4  | 16.21 | 0.38 |
| -1 | 5  | 4  | 15.17 | 0.68 |
| 1  | 5  | -4 | 16.61 | 0.44 |
| 1  | 5  | -4 | 16.10 | 0.53 |
| 1  | 5  | -4 | 15.67 | 0.42 |
| 0  | -5 | 4  | 0.63  | 0.25 |
| 0  | -5 | 4  | 0.71  | 0.16 |
| 0  | -5 | -4 | 0.13  | 0.24 |
| 0  | -5 | -4 | 0.13  | 0.22 |
| 0  | -5 | 4  | 0.82  | 0.16 |
| 0  | -5 | -4 | 0.75  | 0.26 |
| 0  | 5  | -4 | 0.64  | 0.17 |
| 0  | 5  | 4  | 0.81  | 0.28 |
| 0  | 5  | -4 | 0.38  | 0.15 |
| 0  | 5  | 4  | 0.53  | 0.21 |
| 1  | -5 | 4  | 20.98 | 0.62 |
| 1  | -5 | 4  | 19.75 | 0.72 |
| -1 | -5 | -4 | 21.74 | 0.84 |
| 1  | -5 | 4  | 20.76 | 0.69 |
| -1 | -5 | -4 | 21.64 | 0.76 |
| -1 | -5 | -4 | 20.06 | 0.82 |

-1 5 -4 21.15 0.57  
-1 5 -4 20.69 0.68  
1 5 4 20.18 0.66  
1 5 4 20.96 0.74  
2 -5 4 12.57 0.52  
2 -5 4 12.80 0.59  
-2 -5 -4 12.98 0.69  
2 -5 4 11.84 0.57  
-2 -5 -4 11.33 0.57  
2 5 4 12.08 0.50  
-2 5 -4 13.32 0.59  
-2 5 -4 12.14 0.39  
-2 5 -4 12.73 0.61  
2 5 4 11.82 0.61  
3 -5 4 6.46 0.52  
-3 -5 -4 6.78 0.28  
-3 -5 -4 7.54 0.60  
-3 -5 -4 7.26 0.55  
3 5 4 7.08 0.53  
-3 5 -4 6.27 0.27  
3 5 4 6.58 0.44  
-3 5 -4 6.93 0.48  
-3 5 -4 6.41 0.50  
3 5 4 5.62 0.53  
-4 -5 -4 8.34 0.67  
-4 -5 -4 7.97 0.35  
-4 -5 -4 6.54 0.53  
4 -5 4 7.97 0.59  
4 -5 4 7.08 0.57  
4 -5 4 8.59 0.54  
-4 5 -4 9.09 0.60  
4 5 4 8.92 0.63  
4 5 4 6.72 0.59  
-4 5 -4 7.79 0.60  
4 5 4 7.73 0.48  
5 -5 4 3.20 0.46  
-5 -5 -4 3.78 0.45  
5 -5 4 4.18 0.46  
-5 5 -4 3.88 0.50  
-5 5 -4 3.42 0.46  
5 5 4 3.42 0.48  
-6 -5 -4 5.59 0.54  
6 -5 4 6.40 0.55  
6 -5 4 6.71 0.57  
6 5 4 6.82 0.44  
-6 5 -4 5.73 0.55

6 5 4 6.42 0.59  
-7 -5 -4 0.76 0.41  
7 -5 4 0.52 0.38  
7 -5 4 0.87 0.38  
-7 5 -4 1.14 0.37  
7 5 4 0.58 0.38  
8 -5 4 1.13 0.41  
8 -5 4 1.80 0.46  
-8 -5 -4 1.00 0.44  
8 5 4 0.28 0.39  
-8 5 -4 0.02 0.39  
9 -5 4 -0.33 0.38  
9 -5 4 -0.21 0.41  
-9 -5 -4 0.30 0.40  
9 5 4 0.53 0.45  
-9 5 -4 -0.05 0.35  
10 -5 4 -0.64 0.43  
-10 -5 -4 -0.28 0.48  
-10 5 -4 -0.22 0.44  
-10 5 -4 0.79 0.44  
10 5 4 0.30 0.47  
11 -5 4 0.47 0.51  
-11 -5 -4 0.01 0.55  
-11 5 -4 -0.14 0.48  
11 5 4 0.25 0.51  
13 -6 -4 0.72 0.53  
-13 -6 4 0.64 0.47  
-13 6 4 0.41 0.51  
12 -6 -4 -0.35 0.44  
-12 -6 4 0.24 0.43  
12 6 -4 0.15 0.43  
-12 6 4 -0.46 0.41  
11 -6 -4 -0.04 0.45  
-11 -6 4 0.40 0.42  
11 6 -4 0.24 0.34  
-11 6 4 0.31 0.36  
-10 -6 4 0.11 0.36  
10 -6 -4 -0.40 0.40  
-10 6 4 -0.07 0.36  
10 6 -4 -0.16 0.36  
9 -6 -4 1.12 0.46  
-9 -6 4 1.61 0.39  
-9 6 4 1.12 0.34  
-9 6 4 0.88 0.28  
9 6 -4 0.90 0.37  
8 -6 -4 0.61 0.38

-8 -6 4 0.76 0.36  
-8 -6 4 0.78 0.36  
8 6 -4 0.45 0.29  
-8 6 4 0.79 0.26  
-8 6 4 0.49 0.31  
-7 -6 4 0.53 0.35  
7 -6 -4 1.70 0.44  
-7 -6 4 0.89 0.37  
-7 6 4 1.17 0.30  
7 6 -4 1.13 0.28  
7 6 -4 0.98 0.35  
-7 6 4 0.54 0.30  
-6 -6 4 2.01 0.36  
-6 -6 4 1.75 0.34  
6 -6 -4 1.45 0.39  
6 -6 -4 2.19 0.28  
6 6 -4 1.96 0.25  
-6 6 4 1.91 0.33  
-6 6 4 2.20 0.34  
6 6 -4 1.79 0.26  
6 6 -4 1.69 0.34  
-5 -6 4 0.36 0.33  
5 -6 -4 0.49 0.40  
5 -6 -4 0.53 0.39  
5 -6 -4 -0.01 0.23  
-5 -6 4 0.24 0.32  
-5 -6 4 0.21 0.20  
-5 6 4 0.11 0.23  
5 6 -4 0.18 0.26  
-5 6 4 0.67 0.37  
-5 6 4 0.17 0.32  
5 6 -4 0.22 0.16  
-4 -6 4 14.60 0.67  
4 -6 -4 14.91 0.74  
4 -6 -4 13.31 0.82  
4 -6 -4 15.30 0.61  
-4 -6 4 13.43 0.65  
-4 6 4 14.26 0.81  
-4 6 4 13.99 0.51  
-4 6 4 13.59 0.57  
4 6 -4 14.44 0.60  
3 -6 -4 5.08 0.47  
3 -6 -4 4.49 0.50  
-3 -6 4 4.51 0.43  
3 -6 -4 4.42 0.40  
-3 -6 4 3.96 0.39

-3 6 4 5.53 0.52  
-3 6 4 4.59 0.29  
-3 6 4 4.54 0.38  
3 6 -4 4.21 0.38  
-2 -6 4 0.59 0.33  
2 -6 -4 1.02 0.31  
2 -6 -4 1.19 0.34  
2 -6 -4 0.70 0.32  
-2 -6 4 0.74 0.30  
-2 6 4 0.90 0.14  
2 6 -4 0.42 0.21  
-2 6 4 0.79 0.25  
-2 6 4 0.91 0.30  
-1 -6 4 5.62 0.47  
1 -6 -4 6.35 0.49  
1 -6 -4 5.92 0.47  
-1 -6 4 5.81 0.44  
1 -6 -4 4.63 0.47  
1 6 -4 5.46 0.36  
-1 6 4 5.81 0.21  
-1 6 4 4.79 0.38  
-1 6 4 5.21 0.46  
0 -6 4 1.33 0.17  
0 -6 -4 1.21 0.30  
0 -6 4 1.14 0.33  
0 -6 4 1.45 0.19  
0 -6 -4 0.90 0.30  
0 -6 -4 0.71 0.28  
0 6 -4 0.87 0.22  
0 6 4 0.95 0.30  
0 6 -4 1.14 0.18  
0 6 -4 1.14 0.28  
0 6 4 1.51 0.28  
-1 -6 -4 17.46 0.80  
1 -6 4 15.81 0.61  
-1 -6 -4 16.47 0.78  
1 -6 4 16.56 0.71  
-1 -6 -4 16.05 0.69  
1 -6 4 15.99 0.52  
1 6 4 15.97 0.68  
-1 6 -4 14.93 0.64  
1 6 4 16.89 0.62  
-1 6 -4 16.40 0.60  
-1 6 -4 15.85 0.52  
2 -6 4 3.96 0.33  
-2 -6 -4 4.27 0.44

-2 -6 -4 4.20 0.45  
2 -6 4 3.64 0.41  
-2 -6 -4 3.76 0.43  
2 -6 4 3.82 0.37  
-2 6 -4 3.54 0.27  
2 6 4 4.25 0.38  
-2 6 -4 3.80 0.43  
-2 6 -4 4.33 0.39  
2 6 4 3.85 0.42  
3 -6 4 2.27 0.33  
3 -6 4 1.25 0.31  
-3 -6 -4 2.41 0.38  
3 -6 4 1.61 0.39  
-3 -6 -4 1.68 0.39  
-3 6 -4 1.78 0.20  
-3 6 -4 1.65 0.34  
3 6 4 2.61 0.41  
3 6 4 1.63 0.38  
3 6 4 1.84 0.31  
-3 6 -4 1.54 0.36  
-4 -6 -4 11.71 0.67  
4 -6 4 14.27 0.73  
-4 -6 -4 13.40 0.79  
-4 6 -4 13.45 0.72  
-4 6 -4 13.33 0.75  
4 6 4 12.57 0.70  
4 6 4 13.30 0.58  
5 -6 4 6.39 0.58  
-5 -6 -4 5.57 0.55  
5 -6 4 6.52 0.54  
-5 6 -4 5.27 0.53  
5 6 4 8.01 0.50  
5 6 4 7.36 0.61  
6 -6 4 1.05 0.39  
-6 -6 -4 1.35 0.42  
6 -6 4 1.15 0.37  
-6 6 -4 0.99 0.37  
6 6 4 0.31 0.38  
7 -6 4 4.35 0.53  
7 -6 4 3.39 0.48  
-7 -6 -4 3.21 0.52  
7 6 4 3.49 0.52  
-7 6 -4 3.03 0.48  
8 -6 4 0.70 0.41  
8 -6 4 -0.38 0.35  
-8 -6 -4 0.05 0.41

-8 6 -4 0.34 0.41  
8 6 4 0.51 0.39  
-9 -6 -4 0.46 0.47  
9 -6 4 1.11 0.47  
9 -6 4 -0.10 0.42  
-9 6 -4 0.16 0.39  
9 6 4 0.61 0.47  
10 -6 4 -0.33 0.45  
10 -6 4 0.21 0.46  
-10 -6 -4 0.15 0.53  
10 6 4 0.13 0.48  
-10 6 -4 -0.19 0.45  
-11 -6 -4 -0.33 0.56  
11 -6 4 0.43 0.88  
11 6 4 0.43 0.53  
-13 -7 4 -0.01 0.48  
12 -7 -4 0.12 0.49  
-12 -7 4 -0.40 0.43  
12 7 -4 0.19 0.45  
-12 7 4 -0.04 0.40  
11 -7 -4 0.14 0.43  
-11 -7 4 -0.17 0.38  
-11 7 4 -0.12 0.35  
11 7 -4 -0.05 0.35  
10 -7 -4 -0.15 0.42  
-10 -7 4 0.40 0.33  
10 7 -4 0.63 0.35  
-10 7 4 0.19 0.32  
-9 -7 4 0.37 0.37  
9 -7 -4 -0.04 0.36  
9 7 -4 -0.31 0.32  
-9 7 4 0.07 0.32  
8 -7 -4 4.74 0.55  
-8 -7 4 4.96 0.55  
-8 -7 4 5.23 0.53  
-8 7 4 4.17 0.48  
-8 7 4 5.52 0.46  
8 7 -4 4.08 0.48  
7 -7 -4 1.55 0.43  
-7 -7 4 1.52 0.39  
7 7 -4 0.77 0.31  
-7 7 4 0.96 0.28  
-7 7 4 1.85 0.34  
-6 -7 4 10.89 0.67  
6 -7 -4 12.11 0.56  
6 -7 -4 11.96 0.76



-6 -7 4 12.48 0.71  
-6 7 4 11.99 0.56  
-6 7 4 11.85 0.59  
6 7 -4 10.85 0.60  
5 -7 -4 11.64 0.57  
-5 -7 4 10.33 0.64  
5 -7 -4 12.68 0.74  
-5 -7 4 11.21 0.69  
-5 7 4 11.54 0.56  
5 7 -4 10.71 0.58  
-5 7 4 10.39 0.83  
-4 -7 4 0.55 0.30  
4 -7 -4 1.02 0.32  
4 -7 -4 0.98 0.40  
4 -7 -4 0.90 0.37  
-4 -7 4 1.18 0.38  
-4 7 4 1.08 0.23  
-4 7 4 1.06 0.38  
-4 7 4 1.41 0.30  
4 7 -4 0.75 0.29  
3 -7 -4 35.12 1.09  
-3 -7 4 35.37 1.10  
-3 -7 4 33.90 1.12  
3 -7 -4 36.72 1.19  
3 -7 -4 36.42 1.31  
-3 7 4 35.29 1.02  
-3 7 4 37.05 0.92  
-3 7 4 37.46 1.30  
3 7 -4 34.81 1.02  
2 -7 -4 10.28 0.63  
2 -7 -4 9.76 0.69  
2 -7 -4 8.71 0.61  
-2 -7 4 10.46 0.64  
-2 -7 4 9.58 0.55  
-2 7 4 9.92 0.37  
-2 7 4 11.14 0.55  
-2 7 4 9.86 0.66  
2 7 -4 10.60 0.52  
-1 -7 4 16.74 0.73  
1 -7 -4 16.25 0.85  
1 -7 -4 17.33 0.74  
-1 -7 4 16.09 0.72  
1 -7 -4 17.31 0.74  
-1 7 4 16.77 0.45  
-1 7 4 17.57 0.80  
1 7 -4 16.50 0.61

-1 7 4 16.36 0.65  
0 -7 -4 2.00 0.36  
0 -7 4 2.02 0.38  
0 -7 4 2.11 0.19  
0 -7 -4 1.88 0.39  
0 -7 -4 2.62 0.41  
0 -7 4 1.90 0.20  
0 7 4 2.36 0.34  
0 7 -4 1.52 0.32  
0 7 -4 1.90 0.22  
0 7 4 2.66 0.39  
0 7 -4 1.82 0.26  
1 -7 4 9.89 0.43  
-1 -7 -4 10.98 0.68  
-1 -7 -4 11.65 0.70  
1 -7 4 11.49 0.62  
1 -7 4 10.39 0.49  
-1 -7 -4 12.29 0.71  
-1 7 -4 10.69 0.52  
-1 7 -4 10.08 0.57  
-1 7 -4 10.86 0.47  
1 7 4 10.10 0.58  
1 7 4 11.69 0.65  
2 -7 4 2.37 0.29  
-2 -7 -4 2.56 0.40  
-2 -7 -4 1.54 0.42  
-2 -7 -4 1.71 0.37  
2 -7 4 1.83 0.30  
2 -7 4 1.50 0.40  
2 7 4 1.62 0.36  
-2 7 -4 2.00 0.38  
-2 7 -4 1.49 0.25  
-2 7 -4 1.85 0.32  
2 7 4 1.92 0.34  
-3 -7 -4 11.39 0.73  
-3 -7 -4 12.53 0.74  
3 -7 4 11.37 0.65  
-3 -7 -4 11.05 0.73  
3 -7 4 11.51 0.62  
3 -7 4 11.68 0.56  
-3 7 -4 11.09 0.66  
3 7 4 11.28 0.69  
3 7 4 10.38 0.57  
-3 7 -4 10.38 0.66  
-4 -7 -4 4.74 0.53  
4 -7 4 5.26 0.50

4 -7 4 4.71 0.51  
4 -7 4 5.28 0.45  
4 7 4 5.25 0.45  
4 7 4 4.91 0.51  
-4 7 -4 5.50 0.54  
-4 7 -4 4.40 0.50  
5 -7 4 0.52 0.40  
-5 -7 -4 0.28 0.38  
5 -7 4 0.84 0.34  
5 7 4 0.28 0.35  
-5 7 -4 0.83 0.34  
5 7 4 0.55 0.30  
-6 -7 -4 5.78 0.63  
6 -7 4 5.40 0.54  
6 -7 4 4.43 0.50  
6 7 4 6.04 0.50  
-6 7 -4 4.92 0.56  
6 7 4 4.83 0.57  
7 -7 4 0.11 0.37  
7 -7 4 -0.08 0.33  
-7 -7 -4 0.19 0.43  
7 7 4 0.72 0.42  
-7 7 -4 -0.49 0.32  
8 -7 4 1.70 0.46  
-8 -7 -4 -0.02 0.49  
8 -7 4 1.16 0.45  
8 7 4 2.39 0.53  
-8 7 -4 1.14 0.46  
-9 -7 -4 0.12 0.53  
9 -7 4 0.14 0.44  
9 -7 4 -0.07 0.45  
-9 7 -4 -0.02 0.46  
9 7 4 1.06 0.50  
10 -7 4 0.37 0.51  
10 -7 4 0.24 0.49  
-10 -7 -4 -0.41 0.55  
10 7 4 -0.18 0.49  
-10 7 -4 0.42 0.45  
-11 -7 -4 -0.66 0.64  
-13 -8 4 -0.32 0.47  
-12 -8 4 -0.19 0.45  
12 -8 -4 0.14 0.49  
12 8 -4 0.17 0.41  
-12 8 4 -0.55 0.45  
-11 -8 4 -0.42 0.40  
11 -8 -4 0.53 0.48

|     |    |    |       |      |
|-----|----|----|-------|------|
| 11  | 8  | -4 | 0.58  | 0.46 |
| -11 | 8  | 4  | -0.11 | 0.44 |
| -10 | -8 | 4  | 0.29  | 0.38 |
| 10  | -8 | -4 | -0.35 | 0.44 |
| 10  | 8  | -4 | 0.46  | 0.37 |
| -10 | 8  | 4  | 0.04  | 0.39 |
| -9  | -8 | 4  | 0.56  | 0.39 |
| 9   | -8 | -4 | 0.82  | 0.45 |
| 9   | 8  | -4 | 0.62  | 0.35 |
| -9  | 8  | 4  | 0.30  | 0.35 |
| -8  | -8 | 4  | 1.39  | 0.41 |
| 8   | -8 | -4 | 1.84  | 0.49 |
| 8   | 8  | -4 | 1.48  | 0.41 |
| -8  | 8  | 4  | 1.36  | 0.33 |
| -8  | 8  | 4  | 2.05  | 0.41 |
| -7  | -8 | 4  | 0.23  | 0.38 |
| 7   | -8 | -4 | 0.02  | 0.39 |
| -7  | -8 | 4  | 0.39  | 0.35 |
| 7   | 8  | -4 | -0.17 | 0.29 |
| -7  | 8  | 4  | 0.16  | 0.28 |
| -7  | 8  | 4  | 0.23  | 0.28 |
| -6  | -8 | 4  | 11.55 | 0.72 |
| -6  | -8 | 4  | 11.64 | 0.67 |
| 6   | -8 | -4 | 12.00 | 0.76 |
| 6   | -8 | -4 | 11.84 | 0.60 |
| 6   | 8  | -4 | 10.91 | 0.63 |
| -6  | 8  | 4  | 10.36 | 0.57 |
| -6  | 8  | 4  | 11.24 | 0.59 |
| -5  | -8 | 4  | 5.46  | 0.50 |
| 5   | -8 | -4 | 6.38  | 0.60 |
| 5   | -8 | -4 | 5.06  | 0.46 |
| -5  | -8 | 4  | 5.28  | 0.56 |
| -5  | 8  | 4  | 5.07  | 0.45 |
| -5  | 8  | 4  | 5.46  | 0.56 |
| 5   | 8  | -4 | 5.12  | 0.48 |
| -4  | -8 | 4  | 14.44 | 0.73 |
| 4   | -8 | -4 | 15.04 | 0.70 |
| -4  | -8 | 4  | 15.64 | 0.80 |
| 4   | -8 | -4 | 13.64 | 0.81 |
| 4   | -8 | -4 | 15.73 | 1.43 |
| -4  | 8  | 4  | 14.86 | 0.71 |
| -4  | 8  | 4  | 14.98 | 0.91 |
| 4   | 8  | -4 | 15.22 | 0.69 |
| -4  | 8  | 4  | 14.40 | 0.58 |
| -3  | -8 | 4  | 8.20  | 0.64 |
| 3   | -8 | -4 | 7.35  | 0.61 |

3 -8 -4 7.43 0.67  
-3 -8 4 7.41 0.53  
3 -8 -4 8.07 0.60  
-3 8 4 8.51 0.54  
3 8 -4 6.61 0.49  
-3 8 4 8.28 0.66  
-3 8 4 8.19 0.40  
2 -8 -4 18.23 0.81  
2 -8 -4 18.88 0.85  
-2 -8 4 17.78 0.78  
-2 -8 4 16.26 0.78  
2 -8 -4 17.71 0.93  
2 8 -4 18.49 0.71  
-2 8 4 18.52 0.74  
-2 8 4 17.12 0.88  
-2 8 4 18.07 0.55  
1 -8 -4 7.65 0.63  
-1 -8 4 8.26 0.65  
1 -8 -4 8.61 0.61  
1 -8 -4 8.75 0.69  
-1 8 4 7.86 0.52  
1 8 -4 7.66 0.48  
0 -8 -4 12.92 0.76  
0 -8 4 12.53 0.73  
0 -8 -4 13.42 0.72  
0 -8 -4 12.63 0.74  
0 -8 -4 14.20 0.69  
0 8 -4 13.02 0.59  
0 8 -4 12.99 0.67  
0 8 4 12.92 0.64  
1 -8 4 1.29 0.41  
-1 -8 -4 1.21 0.40  
-1 -8 -4 2.22 0.41  
-1 -8 -4 2.34 0.40  
1 8 4 2.34 0.36  
-1 8 -4 2.05 0.31  
1 8 4 1.88 0.38  
-1 8 -4 1.57 0.34  
-2 -8 -4 2.32 0.40  
-2 -8 -4 2.04 0.44  
2 -8 4 1.23 0.37  
2 -8 4 2.51 0.40  
-2 -8 -4 1.56 0.40  
2 8 4 1.99 0.35  
-2 8 -4 2.14 0.38  
2 8 4 3.10 0.43

-2 8 -4 2.14 0.30  
-3 -8 -4 3.30 0.53  
-3 -8 -4 3.07 0.46  
3 -8 4 2.86 0.47  
3 -8 4 3.34 0.36  
3 8 4 3.19 0.42  
3 8 4 2.60 0.42  
-3 8 -4 2.05 0.38  
4 -8 4 2.21 0.36  
4 -8 4 2.49 0.46  
-4 -8 -4 2.35 0.46  
4 8 4 1.95 0.35  
4 8 4 2.31 0.42  
-4 8 -4 2.16 0.39  
-5 -8 -4 2.76 0.51  
5 -8 4 2.72 0.49  
5 8 4 2.49 0.46  
-5 8 -4 1.83 0.44  
5 8 4 1.72 0.38  
-6 -8 -4 0.00 0.37  
6 -8 4 1.12 0.38  
6 -8 4 1.33 0.43  
6 8 4 1.74 0.43  
6 8 4 1.00 0.36  
-6 8 -4 1.16 0.39  
7 -8 4 0.25 0.38  
-7 -8 -4 0.20 0.46  
7 -8 4 0.59 0.39  
7 8 4 -0.25 0.38  
7 8 4 -0.22 0.30  
-7 8 -4 -0.35 0.31  
-8 -8 -4 0.84 0.52  
8 -8 4 0.38 0.43  
8 -8 4 0.93 0.44  
-8 8 -4 0.26 0.45  
8 8 4 0.63 0.46  
9 -8 4 0.52 0.48  
-9 -8 -4 -0.34 0.54  
9 -8 4 0.22 0.46  
9 8 4 0.02 0.47  
-9 8 -4 -0.49 0.44  
-10 -8 -4 0.15 0.62  
10 -8 4 -0.47 0.47  
10 8 4 0.13 0.51  
12 -9 -4 0.70 0.57  
12 9 -4 -0.61 0.44

-12 9 4 -0.25 0.47  
11 -9 -4 0.11 0.51  
-11 -9 4 -0.32 0.43  
-11 9 4 0.02 0.45  
11 9 -4 -0.33 0.39  
-10 -9 4 0.40 0.41  
10 -9 -4 0.71 0.50  
10 9 -4 0.45 0.45  
-10 9 4 0.61 0.43  
9 -9 -4 0.75 0.45  
-9 -9 4 0.37 0.37  
9 9 -4 -0.02 0.35  
-9 9 4 -0.07 0.34  
-8 -9 4 1.53 0.40  
8 -9 -4 1.74 0.48  
-8 -9 4 0.61 0.44  
-8 9 4 0.73 0.32  
-8 9 4 0.92 0.37  
8 9 -4 0.93 0.37  
-7 -9 4 3.22 0.53  
-7 -9 4 2.58 0.43  
7 -9 -4 1.97 0.49  
7 9 -4 1.34 0.39  
-7 9 4 2.93 0.39  
-7 9 4 2.03 0.39  
6 -9 -4 1.59 0.36  
-6 -9 4 0.87 0.35  
6 -9 -4 1.79 0.46  
-6 -9 4 0.91 0.44  
-6 9 4 1.23 0.36  
6 9 -4 1.00 0.36  
5 -9 -4 3.69 0.52  
-5 -9 4 4.71 0.57  
5 -9 -4 4.05 0.43  
-5 -9 4 3.81 0.45  
-5 9 4 3.40 0.38  
-5 9 4 4.26 0.43  
5 9 -4 4.06 0.46  
-4 -9 4 1.20 0.34  
4 -9 -4 1.20 0.41  
4 -9 -4 0.92 0.36  
-4 -9 4 1.67 0.45  
4 9 -4 1.52 0.36  
-4 9 4 1.14 0.26  
-4 9 4 0.95 0.36  
-3 -9 4 11.10 0.65

-3 -9 4 8.93 0.71  
3 -9 -4 10.58 0.72  
3 -9 -4 9.40 0.66  
-3 9 4 10.38 0.61  
-3 9 4 8.51 0.45  
-3 9 4 9.13 0.72  
3 9 -4 8.76 0.57  
-2 -9 4 9.75 0.72  
-2 -9 4 9.45 0.63  
2 -9 -4 10.54 0.66  
2 -9 -4 8.30 0.71  
2 -9 -4 9.31 0.70  
-2 9 4 9.48 0.60  
2 9 -4 10.93 0.63  
-2 9 4 9.02 0.71  
1 -9 -4 6.48 0.56  
-1 -9 4 6.28 0.58  
1 -9 -4 7.43 0.68  
1 9 -4 7.22 0.56  
-1 9 4 6.15 0.52  
1 9 -4 6.40 0.48  
0 -9 -4 3.88 0.60  
0 -9 4 3.64 0.48  
0 -9 -4 4.30 0.49  
0 9 4 4.14 0.46  
0 9 -4 3.74 0.43  
0 9 -4 3.91 0.41  
-1 -9 -4 6.34 0.57  
-1 -9 -4 6.29 0.62  
1 -9 4 6.33 0.59  
-1 9 -4 6.17 0.46  
1 9 4 6.77 0.54  
-1 9 -4 5.49 0.51  
1 9 4 5.65 0.50  
-2 -9 -4 1.17 0.34  
2 -9 4 0.46 0.35  
-2 -9 -4 0.58 0.41  
-2 9 -4 0.90 0.32  
-2 9 -4 1.13 0.28  
2 9 4 0.40 0.29  
2 9 4 1.18 0.37  
3 -9 4 15.68 0.79  
-3 -9 -4 17.25 0.89  
3 9 4 17.80 0.80  
-3 9 -4 15.29 0.78  
3 9 4 16.71 0.75



-4 -9 -4 1.02 0.42  
4 -9 4 1.52 0.43  
-4 9 -4 0.89 0.38  
4 9 4 0.93 0.37  
4 9 4 1.19 0.40  
5 -9 4 1.49 0.44  
-5 -9 -4 3.11 0.58  
5 9 4 2.62 0.47  
5 9 4 1.58 0.37  
-5 9 -4 2.04 0.47  
-6 -9 -4 0.55 0.43  
6 -9 4 0.98 0.38  
-6 9 -4 1.06 0.43  
6 9 4 0.68 0.40  
6 9 4 0.14 0.30  
7 -9 4 0.54 0.44  
7 -9 4 0.69 0.44  
-7 -9 -4 -0.34 0.47  
7 9 4 0.19 0.41  
-7 9 -4 0.51 0.44  
7 9 4 0.31 0.36  
-8 -9 -4 1.03 0.60  
8 -9 4 0.89 0.48  
8 -9 4 0.59 0.45  
8 9 4 1.00 0.52  
-8 9 -4 0.26 0.47  
-9 -9 -4 0.42 0.62  
9 -9 4 0.55 0.49  
9 -9 4 0.22 0.50  
-9 9 -4 -0.75 0.44  
10 -9 4 -0.03 0.70  
11 -10 -4 0.68 0.55  
11 10 -4 0.63 0.46  
-11 10 4 0.57 0.49  
-10 -10 4 -0.25 0.42  
10 -10 -4 0.17 0.52  
10 10 -4 -0.03 0.40  
-10 10 4 0.47 0.43  
-9 -10 4 0.50 0.38  
-9 -10 4 0.70 0.55  
9 -10 -4 1.08 0.52  
9 10 -4 1.14 0.43  
-9 10 4 0.71 0.37  
-8 -10 4 -0.06 0.33  
-8 -10 4 0.59 0.45  
8 -10 -4 0.19 0.44

|    |     |    |       |      |
|----|-----|----|-------|------|
| -8 | 10  | 4  | 0.64  | 0.37 |
| 8  | 10  | -4 | 0.67  | 0.41 |
| -7 | -10 | 4  | 2.41  | 0.43 |
| -7 | -10 | 4  | 1.90  | 0.51 |
| 7  | -10 | -4 | 2.02  | 0.51 |
| -7 | 10  | 4  | 2.13  | 0.40 |
| 7  | 10  | -4 | 1.83  | 0.41 |
| -7 | 10  | 4  | 1.81  | 0.39 |
| 6  | -10 | -4 | 0.39  | 0.33 |
| 6  | -10 | -4 | 0.35  | 0.42 |
| -6 | -10 | 4  | -0.04 | 0.31 |
| -6 | -10 | 4  | 0.76  | 0.46 |
| 6  | 10  | -4 | 0.06  | 0.32 |
| -6 | 10  | 4  | 0.32  | 0.34 |
| -5 | -10 | 4  | 0.75  | 0.43 |
| 5  | -10 | -4 | 1.80  | 0.47 |
| -5 | -10 | 4  | 1.73  | 0.39 |
| 5  | -10 | -4 | 1.90  | 0.39 |
| -5 | 10  | 4  | 2.56  | 0.44 |
| 5  | 10  | -4 | 1.51  | 0.38 |
| -5 | 10  | 4  | 1.58  | 0.32 |
| 4  | -10 | -4 | 1.42  | 0.40 |
| 4  | -10 | -4 | 1.58  | 0.44 |
| -4 | -10 | 4  | -0.06 | 0.37 |
| -4 | -10 | 4  | 1.26  | 0.37 |
| 4  | 10  | -4 | 0.83  | 0.34 |
| -4 | 10  | 4  | 1.45  | 0.36 |
| 3  | -10 | -4 | 0.28  | 0.35 |
| 3  | -10 | -4 | 0.36  | 0.39 |
| -3 | -10 | 4  | 0.20  | 0.31 |
| -3 | -10 | 4  | 0.07  | 0.41 |
| -3 | 10  | 4  | -0.24 | 0.30 |
| 3  | 10  | -4 | -0.27 | 0.29 |
| -2 | -10 | 4  | 2.37  | 0.50 |
| -2 | -10 | 4  | 0.71  | 0.36 |
| 2  | -10 | -4 | 1.74  | 0.44 |
| -2 | 10  | 4  | 2.12  | 0.43 |
| -2 | 10  | 4  | 1.81  | 0.42 |
| 2  | 10  | -4 | 1.70  | 0.40 |
| -1 | -10 | 4  | 7.57  | 0.64 |
| 1  | -10 | -4 | 9.16  | 0.75 |
| 1  | -10 | -4 | 7.97  | 0.64 |
| 1  | 10  | -4 | 7.97  | 0.56 |
| -1 | 10  | 4  | 6.55  | 0.56 |
| 1  | 10  | -4 | 9.01  | 0.60 |
| 0  | -10 | -4 | 2.83  | 0.45 |

|    |     |    |       |      |
|----|-----|----|-------|------|
| 0  | -10 | -4 | 3.11  | 0.62 |
| 0  | -10 | -4 | 4.35  | 0.50 |
| 0  | -10 | -4 | 3.77  | 0.59 |
| 0  | -10 | 4  | 3.34  | 0.52 |
| 0  | 10  | 4  | 2.57  | 0.42 |
| 0  | 10  | -4 | 3.36  | 0.46 |
| 0  | 10  | -4 | 3.70  | 0.40 |
| -1 | -10 | -4 | 0.38  | 0.48 |
| 1  | -10 | 4  | 1.58  | 0.40 |
| -1 | -10 | -4 | 1.82  | 0.40 |
| -1 | 10  | -4 | 0.95  | 0.37 |
| -1 | 10  | -4 | 1.01  | 0.31 |
| 1  | 10  | 4  | 0.83  | 0.33 |
| 2  | -10 | 4  | 6.44  | 0.59 |
| -2 | -10 | -4 | 8.43  | 0.74 |
| -2 | 10  | -4 | 8.82  | 0.67 |
| 2  | 10  | 4  | 7.72  | 0.60 |
| -2 | 10  | -4 | 7.66  | 0.50 |
| 2  | 10  | 4  | 8.06  | 0.61 |
| 3  | -10 | 4  | 0.27  | 0.40 |
| -3 | -10 | -4 | 0.00  | 0.45 |
| 3  | 10  | 4  | 0.94  | 0.37 |
| -3 | 10  | -4 | 0.53  | 0.36 |
| 3  | 10  | 4  | 0.10  | 0.36 |
| -4 | -10 | -4 | 6.54  | 0.71 |
| 4  | -10 | 4  | 6.57  | 0.65 |
| 4  | 10  | 4  | 6.29  | 0.57 |
| -4 | 10  | -4 | 5.69  | 0.61 |
| 4  | 10  | 4  | 7.01  | 0.60 |
| 5  | -10 | 4  | 0.86  | 0.39 |
| -5 | -10 | -4 | -0.34 | 0.39 |
| -5 | 10  | -4 | -0.54 | 0.30 |
| 5  | 10  | 4  | -0.11 | 0.29 |
| 5  | 10  | 4  | -0.14 | 0.39 |
| 6  | -10 | 4  | 0.65  | 0.44 |
| -6 | -10 | -4 | -0.27 | 0.48 |
| -6 | 10  | -4 | -0.06 | 0.41 |
| 6  | 10  | 4  | -0.07 | 0.31 |
| 7  | -10 | 4  | 0.29  | 0.39 |
| -7 | -10 | -4 | -0.66 | 0.52 |
| -7 | 10  | -4 | -0.21 | 0.38 |
| 7  | 10  | 4  | 0.01  | 0.38 |
| -8 | -10 | -4 | -0.81 | 0.57 |
| 8  | -10 | 4  | 0.27  | 0.47 |
| -8 | 10  | -4 | -0.62 | 0.38 |
| -9 | -10 | -4 | -0.51 | 0.61 |

|       |     |      |       |      |
|-------|-----|------|-------|------|
| 9-10  | 4   | 0.22 | 0.50  |      |
| 11-11 | -4  | 0.56 | 0.60  |      |
| -11   | 11  | 4    | 0.79  | 0.53 |
| 10-11 | -4  | 0.53 | 0.56  |      |
| 10    | 11  | -4   | -0.16 | 0.48 |
| -10   | 11  | 4    | -0.51 | 0.42 |
| -9    | -11 | 4    | 0.17  | 0.40 |
| 9     | -11 | -4   | -0.45 | 0.48 |
| -9    | -11 | 4    | -0.17 | 0.59 |
| -9    | 11  | 4    | -0.35 | 0.38 |
| 9     | 11  | -4   | 0.20  | 0.47 |
| 8     | -11 | -4   | -0.25 | 0.44 |
| -8    | -11 | 4    | -0.12 | 0.47 |
| -8    | -11 | 4    | 0.67  | 0.40 |
| 8     | 11  | -4   | -0.07 | 0.36 |
| -8    | 11  | 4    | 0.26  | 0.37 |
| -7    | -11 | 4    | -0.07 | 0.33 |
| 7     | -11 | -4   | -0.02 | 0.42 |
| -7    | -11 | 4    | 0.13  | 0.46 |
| -7    | 11  | 4    | 0.57  | 0.36 |
| 7     | 11  | -4   | -0.24 | 0.36 |
| -7    | 11  | 4    | 0.12  | 0.34 |
| -6    | -11 | 4    | 0.51  | 0.35 |
| 6     | -11 | -4   | 0.50  | 0.44 |
| -6    | -11 | 4    | 0.96  | 0.47 |
| 6     | -11 | -4   | 0.98  | 0.39 |
| 6     | 11  | -4   | 1.23  | 0.39 |
| -6    | 11  | 4    | 0.60  | 0.36 |
| -5    | -11 | 4    | 2.63  | 0.45 |
| -5    | -11 | 4    | 1.69  | 0.47 |
| 5     | -11 | -4   | 1.56  | 0.40 |
| 5     | -11 | -4   | 2.85  | 0.52 |
| -5    | 11  | 4    | 3.26  | 0.47 |
| 5     | 11  | -4   | 2.03  | 0.46 |
| -4    | -11 | 4    | -0.10 | 0.31 |
| 4     | -11 | -4   | -0.43 | 0.36 |
| -4    | -11 | 4    | -0.67 | 0.34 |
| 4     | -11 | -4   | 0.14  | 0.36 |
| -4    | 11  | 4    | -0.12 | 0.30 |
| 4     | 11  | -4   | 0.01  | 0.33 |
| 3     | -11 | -4   | 1.54  | 0.43 |
| -3    | -11 | 4    | 1.52  | 0.49 |
| -3    | -11 | 4    | 1.78  | 0.37 |
| -3    | 11  | 4    | 1.67  | 0.41 |
| 3     | 11  | -4   | 1.82  | 0.44 |
| -2    | -11 | 4    | 1.26  | 0.44 |

|    |     |    |       |      |
|----|-----|----|-------|------|
| 2  | -11 | -4 | 1.49  | 0.48 |
| 2  | -11 | -4 | 2.27  | 0.45 |
| -2 | 11  | 4  | 2.61  | 0.44 |
| 2  | 11  | -4 | 2.74  | 0.46 |
| 2  | 11  | -4 | 1.95  | 0.41 |
| 1  | -11 | -4 | 4.30  | 0.52 |
| -1 | -11 | 4  | 4.67  | 0.56 |
| 1  | -11 | -4 | 4.37  | 0.63 |
| 1  | 11  | -4 | 5.00  | 0.52 |
| -1 | 11  | 4  | 5.32  | 0.56 |
| 1  | 11  | -4 | 5.11  | 0.53 |
| 0  | -11 | -4 | -0.07 | 0.34 |
| 0  | -11 | 4  | 0.14  | 0.41 |
| 0  | -11 | -4 | -0.35 | 0.46 |
| 0  | 11  | -4 | -0.03 | 0.28 |
| 0  | 11  | -4 | 0.41  | 0.30 |
| 0  | 11  | 4  | 0.63  | 0.38 |
| -1 | -11 | -4 | 1.03  | 0.48 |
| -1 | -11 | -4 | 0.91  | 0.57 |
| 1  | -11 | 4  | 1.96  | 0.48 |
| -1 | 11  | -4 | 0.65  | 0.33 |
| 1  | 11  | 4  | 1.41  | 0.42 |
| -1 | 11  | -4 | 0.89  | 0.38 |
| -2 | -11 | -4 | 2.36  | 0.56 |
| 2  | -11 | 4  | 1.39  | 0.41 |
| -2 | 11  | -4 | 1.77  | 0.44 |
| 2  | 11  | 4  | 1.58  | 0.42 |
| 3  | -11 | 4  | 2.18  | 0.48 |
| -3 | -11 | -4 | 2.30  | 0.56 |
| 3  | 11  | 4  | 2.03  | 0.43 |
| -3 | 11  | -4 | 1.63  | 0.40 |
| -4 | -11 | -4 | 0.70  | 0.48 |
| 4  | -11 | 4  | 1.24  | 0.45 |
| -4 | 11  | -4 | 1.13  | 0.39 |
| 4  | 11  | 4  | 1.04  | 0.42 |
| 5  | -11 | 4  | -0.24 | 0.40 |
| -5 | -11 | -4 | 0.25  | 0.48 |
| 5  | 11  | 4  | 0.03  | 0.37 |
| -5 | 11  | -4 | 0.11  | 0.36 |
| -6 | -11 | -4 | 1.00  | 0.55 |
| 6  | -11 | 4  | 0.51  | 0.46 |
| 6  | 11  | 4  | 0.11  | 0.35 |
| -6 | 11  | -4 | -0.06 | 0.44 |
| 7  | -11 | 4  | 0.41  | 0.41 |
| -7 | -11 | -4 | 0.39  | 0.62 |
| 7  | 11  | 4  | 0.87  | 0.44 |

|     |     |    |       |      |
|-----|-----|----|-------|------|
| -7  | 11  | -4 | 0.04  | 0.47 |
| 8   | -11 | 4  | 1.76  | 0.57 |
| -8  | -11 | -4 | -0.01 | 0.59 |
| -8  | 11  | -4 | 0.13  | 0.76 |
| 10  | -12 | -4 | 0.79  | 0.56 |
| -10 | 12  | 4  | 0.76  | 0.55 |
| 9   | -12 | -4 | -0.05 | 0.54 |
| -9  | -12 | 4  | 0.48  | 0.74 |
| 9   | 12  | -4 | -0.15 | 0.44 |
| 8   | -12 | -4 | 0.03  | 0.47 |
| -8  | -12 | 4  | 0.16  | 0.51 |
| 8   | 12  | -4 | 0.18  | 0.44 |
| -7  | -12 | 4  | 0.70  | 0.54 |
| -7  | -12 | 4  | 0.15  | 0.39 |
| 7   | -12 | -4 | -0.03 | 0.47 |
| -7  | 12  | 4  | 0.53  | 0.44 |
| 7   | 12  | -4 | 0.28  | 0.41 |
| 6   | -12 | -4 | 0.65  | 0.47 |
| -6  | -12 | 4  | -0.08 | 0.42 |
| -6  | -12 | 4  | -0.05 | 0.34 |
| -6  | 12  | 4  | -0.05 | 0.34 |
| 6   | 12  | -4 | -0.26 | 0.38 |
| 5   | -12 | -4 | 0.42  | 0.59 |
| -5  | -12 | 4  | 0.04  | 0.46 |
| 5   | -12 | -4 | 0.35  | 0.37 |
| -5  | -12 | 4  | 0.53  | 0.36 |
| 5   | 12  | -4 | 0.11  | 0.37 |
| -5  | 12  | 4  | 0.52  | 0.42 |
| 4   | -12 | -4 | 2.81  | 0.51 |
| -4  | -12 | 4  | 2.65  | 0.52 |
| -4  | -12 | 4  | 2.43  | 0.46 |
| 4   | 12  | -4 | 2.35  | 0.46 |
| -4  | 12  | 4  | 2.20  | 0.45 |
| -3  | -12 | 4  | 0.55  | 0.42 |
| 3   | -12 | -4 | 0.43  | 0.41 |
| 3   | 12  | -4 | 0.05  | 0.36 |
| -3  | 12  | 4  | 0.59  | 0.38 |
| 2   | -12 | -4 | 1.62  | 0.46 |
| -2  | -12 | 4  | 1.46  | 0.46 |
| 2   | 12  | -4 | 1.72  | 0.42 |
| 2   | 12  | -4 | 1.67  | 0.45 |
| -2  | 12  | 4  | 2.23  | 0.49 |
| -1  | -12 | 4  | 0.91  | 0.45 |
| 1   | -12 | -4 | 0.81  | 0.49 |
| -1  | 12  | 4  | 0.74  | 0.38 |
| 1   | 12  | -4 | 0.32  | 0.39 |

|    |     |    |       |      |
|----|-----|----|-------|------|
| 1  | 12  | -4 | 0.33  | 0.36 |
| 0  | -12 | -4 | -0.63 | 0.46 |
| 0  | -12 | 4  | 0.88  | 0.45 |
| 0  | 12  | -4 | 0.17  | 0.35 |
| 0  | 12  | 4  | 0.27  | 0.34 |
| 0  | 12  | -4 | 0.06  | 0.35 |
| -1 | -12 | -4 | 0.53  | 0.47 |
| 1  | -12 | 4  | 0.74  | 0.43 |
| -1 | 12  | -4 | 1.24  | 0.38 |
| 1  | 12  | 4  | 0.51  | 0.40 |
| -1 | 12  | -4 | 1.00  | 0.42 |
| -2 | -12 | -4 | 0.46  | 0.50 |
| 2  | -12 | 4  | 0.16  | 0.41 |
| -2 | 12  | -4 | 0.36  | 0.38 |
| 2  | 12  | 4  | 0.66  | 0.37 |
| -3 | -12 | -4 | 0.18  | 0.54 |
| 3  | -12 | 4  | -0.23 | 0.36 |
| 3  | 12  | 4  | 0.66  | 0.38 |
| -3 | 12  | -4 | 0.91  | 0.42 |
| -4 | -12 | -4 | -0.24 | 0.56 |
| 4  | -12 | 4  | 0.69  | 0.47 |
| -4 | 12  | -4 | 0.01  | 0.39 |
| 4  | 12  | 4  | -0.14 | 0.34 |
| 5  | -12 | 4  | 0.25  | 0.41 |
| -5 | -12 | -4 | -0.56 | 0.57 |
| -5 | 12  | -4 | 0.82  | 0.49 |
| 5  | 12  | 4  | 0.69  | 0.40 |
| -6 | -12 | -4 | -0.73 | 0.57 |
| 6  | -12 | 4  | -0.23 | 0.42 |
| -6 | 12  | -4 | 0.22  | 0.47 |
| 6  | 12  | 4  | -0.21 | 0.40 |
| 7  | -12 | 4  | 0.17  | 0.48 |
| -7 | -12 | -4 | -0.23 | 0.65 |
| -7 | 12  | -4 | -0.12 | 0.49 |
| 7  | 12  | 4  | 0.38  | 0.44 |
| -8 | -13 | 4  | -0.25 | 0.51 |
| 8  | 13  | -4 | 0.27  | 0.52 |
| -7 | -13 | 4  | 0.19  | 0.54 |
| 7  | 13  | -4 | -0.58 | 0.41 |
| -6 | -13 | 4  | 1.21  | 0.50 |
| 6  | 13  | -4 | 0.46  | 0.45 |
| -6 | 13  | 4  | 0.34  | 0.44 |
| -5 | -13 | 4  | 0.78  | 0.40 |
| -5 | -13 | 4  | 0.78  | 0.47 |
| 5  | -13 | -4 | 0.44  | 0.40 |
| 5  | 13  | -4 | 0.38  | 0.49 |

-5 13 4 0.11 0.43  
-4 -13 4 0.31 0.44  
4 -13 -4 0.94 0.44  
4 13 -4 0.80 0.44  
-4 13 4 0.59 0.44  
-3 -13 4 0.64 0.51  
3 -13 -4 0.73 0.46  
3 13 -4 0.14 0.45  
-3 13 4 0.12 0.39  
3 13 -4 0.26 0.40  
-2 -13 4 0.34 0.43  
2 -13 -4 -0.57 0.41  
2 13 -4 0.04 0.35  
-2 13 4 0.18 0.39  
2 13 -4 0.28 0.42  
1 -13 -4 0.57 0.48  
-1 -13 4 -0.07 0.39  
1 13 -4 -0.49 0.37  
1 13 -4 0.46 0.39  
-1 13 4 0.00 0.37  
0 -13 -4 0.43 0.53  
0 -13 4 0.30 0.45  
0 13 -4 0.87 0.41  
0 13 4 -0.04 0.38  
0 13 -4 0.03 0.37  
1 -13 4 1.46 0.49  
-1 -13 -4 0.35 0.50  
-1 13 -4 0.47 0.40  
-1 13 -4 0.30 0.40  
1 13 4 0.23 0.38  
2 -13 4 -0.37 0.38  
-2 -13 -4 -0.36 0.55  
2 13 4 0.12 0.38  
-2 13 -4 0.14 0.40  
-3 -13 -4 -0.45 0.57  
3 -13 4 0.64 0.48  
-3 13 -4 0.71 0.45  
3 13 4 0.36 0.45  
-4 -13 -4 0.14 0.55  
4 -13 4 0.52 0.48  
4 13 4 0.13 0.40  
-4 13 -4 -0.06 0.44  
5 -13 4 0.01 0.41  
-5 -13 -4 0.03 0.56  
-5 13 -4 -0.05 0.45  
5 13 4 0.49 0.41



6 -13 4 0.62 0.51  
-6 -13 -4 -0.73 0.63  
-6 13 -4 -0.21 0.46  
6 13 4 -0.07 0.44  
-8 -14 4 0.16 0.59  
-7 -14 4 -0.33 0.55  
7 14 -4 -0.34 0.47  
-6 -14 4 0.07 0.53  
-6 14 4 0.30 0.50  
6 14 -4 -0.02 0.51  
-5 -14 4 -0.55 0.50  
5 -14 -4 0.25 0.46  
5 14 -4 -0.11 0.43  
-5 14 4 0.30 0.43  
4 -14 -4 0.39 0.45  
-4 -14 4 -0.04 0.51  
-4 14 4 0.16 0.48  
4 14 -4 0.24 0.42  
3 -14 -4 0.07 0.47  
-3 -14 4 0.48 0.54  
-3 14 4 0.24 0.51  
3 14 -4 0.35 0.41  
3 14 -4 -0.15 0.45  
-2 -14 4 0.41 0.53  
2 -14 -4 0.21 0.48  
2 14 -4 -0.21 0.39  
2 14 -4 0.61 0.43  
-2 14 4 -0.08 0.41  
1 -14 -4 0.41 0.47  
-1 -14 4 0.34 0.46  
-1 14 4 1.01 0.48  
1 14 -4 0.17 0.45  
1 14 -4 1.36 0.45  
0 -14 4 0.17 0.44  
0 -14 -4 0.68 0.57  
0 14 4 0.32 0.40  
0 14 -4 -0.32 0.37  
0 14 -4 0.43 0.45  
1 -14 4 -0.16 0.45  
-1 -14 -4 0.52 0.58  
-1 14 -4 0.16 0.41  
1 14 4 0.37 0.48  
2 -14 4 0.19 0.47  
-2 -14 -4 0.42 0.55  
2 14 4 0.43 0.46  
-2 14 -4 0.12 0.38

|    |     |    |       |      |
|----|-----|----|-------|------|
| -3 | -14 | -4 | 0.09  | 0.62 |
| 3  | -14 | 4  | 0.45  | 0.45 |
| -3 | 14  | -4 | 0.37  | 0.45 |
| 3  | 14  | 4  | -0.22 | 0.46 |
| 4  | -14 | 4  | 0.48  | 0.50 |
| -4 | -14 | -4 | -0.05 | 0.56 |
| -4 | 14  | -4 | 1.04  | 0.53 |
| 4  | 14  | 4  | 0.63  | 0.46 |
| 5  | -14 | 4  | 0.06  | 0.52 |
| -5 | 14  | -4 | -0.43 | 0.45 |
| -5 | -15 | 4  | 0.07  | 0.58 |
| -5 | 15  | 4  | 0.19  | 0.48 |
| 5  | 15  | -4 | 0.22  | 0.56 |
| -4 | -15 | 4  | 0.57  | 0.52 |
| 4  | -15 | -4 | -0.03 | 0.46 |
| -4 | 15  | 4  | -0.01 | 0.42 |
| 4  | 15  | -4 | 0.09  | 0.47 |
| -3 | -15 | 4  | 0.76  | 0.58 |
| 3  | -15 | -4 | 0.22  | 0.50 |
| -3 | 15  | 4  | 0.35  | 0.52 |
| 3  | 15  | -4 | 0.50  | 0.54 |
| 2  | -15 | -4 | 0.18  | 0.52 |
| -2 | -15 | 4  | -0.15 | 0.53 |
| 2  | 15  | -4 | -0.31 | 0.46 |
| -2 | 15  | 4  | 0.31  | 0.46 |
| -1 | -15 | 4  | 0.41  | 0.55 |
| 1  | -15 | -4 | 0.81  | 0.56 |
| 1  | 15  | -4 | 0.26  | 0.44 |
| -1 | 15  | 4  | -0.45 | 0.43 |
| 1  | 15  | -4 | 0.50  | 0.54 |
| 0  | -15 | 4  | 0.53  | 0.48 |
| 0  | -15 | -4 | -0.45 | 0.54 |
| 0  | 15  | -4 | 0.41  | 0.49 |
| 0  | 15  | 4  | -0.55 | 0.49 |
| 0  | 15  | -4 | 0.18  | 0.44 |
| -1 | -15 | -4 | 1.06  | 0.64 |
| 1  | -15 | 4  | 0.49  | 0.51 |
| 1  | 15  | 4  | -0.80 | 0.48 |
| -1 | 15  | -4 | -0.18 | 0.44 |
| -2 | -15 | -4 | -0.43 | 0.60 |
| 2  | -15 | 4  | 0.34  | 0.46 |
| -2 | 15  | -4 | 0.44  | 0.47 |
| 2  | 15  | 4  | 0.64  | 0.50 |
| -3 | 15  | -4 | 0.96  | 0.53 |
| 4  | -16 | -4 | 0.85  | 0.51 |
| 3  | -16 | -4 | 0.38  | 0.53 |

|     |     |    |       |      |
|-----|-----|----|-------|------|
| 2   | -16 | -4 | 0.39  | 0.55 |
| 2   | 16  | -4 | -0.18 | 0.53 |
| 1   | 16  | -4 | 0.34  | 0.48 |
| -2  | 16  | -4 | -0.40 | 0.52 |
| 14  | 0   | -5 | 0.47  | 0.51 |
| -14 | 0   | 5  | 0.25  | 0.50 |
| 13  | 0   | -5 | 1.28  | 0.51 |
| -13 | 0   | 5  | 0.84  | 0.48 |
| 12  | 0   | -5 | -0.08 | 0.39 |
| -12 | 0   | 5  | -0.13 | 0.39 |
| -11 | 0   | 5  | 1.13  | 0.37 |
| 11  | 0   | -5 | 1.69  | 0.47 |
| 10  | 0   | -5 | 3.60  | 0.41 |
| 10  | 0   | -5 | 3.66  | 0.52 |
| -10 | 0   | 5  | 4.12  | 0.49 |
| 9   | 0   | -5 | -0.07 | 0.27 |
| -9  | 0   | 5  | 0.15  | 0.34 |
| 9   | 0   | -5 | 0.38  | 0.38 |
| 8   | 0   | -5 | 2.02  | 0.42 |
| -8  | 0   | 5  | 1.90  | 0.39 |
| 8   | 0   | -5 | 1.26  | 0.29 |
| -8  | 0   | 5  | 1.68  | 0.46 |
| -7  | 0   | 5  | 2.46  | 0.45 |
| 7   | 0   | -5 | 1.45  | 0.40 |
| -7  | 0   | 5  | 2.29  | 0.32 |
| -7  | 0   | 5  | 1.92  | 0.37 |
| 7   | 0   | -5 | 1.87  | 0.39 |
| -6  | 0   | 5  | 8.72  | 0.43 |
| -6  | 0   | 5  | 7.88  | 0.63 |
| 6   | 0   | -5 | 8.55  | 0.61 |
| -6  | 0   | 5  | 9.49  | 0.50 |
| 6   | 0   | -5 | 8.44  | 0.54 |
| 5   | 0   | -5 | 15.68 | 0.63 |
| -5  | 0   | 5  | 15.15 | 0.58 |
| 5   | 0   | -5 | 16.52 | 0.73 |
| -5  | 0   | 5  | 15.26 | 0.73 |
| -5  | 0   | 5  | 15.79 | 0.53 |
| -4  | 0   | 5  | 6.80  | 0.50 |
| 4   | 0   | -5 | 7.28  | 0.50 |
| 4   | 0   | -5 | 6.70  | 0.43 |
| -4  | 0   | 5  | 6.78  | 0.37 |
| -4  | 0   | 5  | 6.76  | 0.34 |
| 3   | 0   | -5 | 75.96 | 1.76 |
| -3  | 0   | 5  | 76.01 | 1.92 |
| -3  | 0   | 5  | 75.06 | 1.60 |
| -3  | 0   | 5  | 75.79 | 1.69 |

|    |   |    |       |      |
|----|---|----|-------|------|
| 3  | 0 | -5 | 76.14 | 1.93 |
| -3 | 0 | 5  | 76.33 | 1.59 |
| -2 | 0 | 5  | 11.85 | 0.47 |
| -2 | 0 | 5  | 12.04 | 0.55 |
| -2 | 0 | 5  | 11.48 | 0.40 |
| 2  | 0 | -5 | 12.28 | 0.55 |
| -2 | 0 | 5  | 11.95 | 0.38 |
| 1  | 0 | -5 | -0.01 | 0.18 |
| -1 | 0 | 5  | -0.10 | 0.18 |
| -1 | 0 | 5  | -0.06 | 0.14 |
| 1  | 0 | -5 | -0.01 | 0.19 |
| -1 | 0 | 5  | -0.09 | 0.11 |
| 0  | 0 | 5  | 4.85  | 0.34 |
| 0  | 0 | -5 | 4.47  | 0.38 |
| 0  | 0 | 5  | 4.94  | 0.39 |
| 0  | 0 | 5  | 4.80  | 0.25 |
| 0  | 0 | 5  | 5.06  | 0.35 |
| 1  | 0 | 5  | 25.02 | 0.75 |
| 1  | 0 | 5  | 25.22 | 0.61 |
| 1  | 0 | 5  | 24.30 | 0.87 |
| 1  | 0 | 5  | 25.72 | 0.79 |
| -1 | 0 | -5 | 25.93 | 0.69 |
| -1 | 0 | -5 | 25.02 | 0.87 |
| -2 | 0 | -5 | 10.36 | 0.41 |
| 2  | 0 | 5  | 11.14 | 0.60 |
| 2  | 0 | 5  | 10.66 | 0.52 |
| 2  | 0 | 5  | 10.68 | 0.51 |
| 2  | 0 | 5  | 9.98  | 0.32 |
| -2 | 0 | -5 | 10.27 | 0.60 |
| 3  | 0 | 5  | 0.07  | 0.27 |
| 3  | 0 | 5  | 0.03  | 0.11 |
| -3 | 0 | -5 | 0.05  | 0.31 |
| -3 | 0 | -5 | -0.33 | 0.17 |
| 3  | 0 | 5  | -0.10 | 0.27 |
| 4  | 0 | 5  | 0.44  | 0.32 |
| 4  | 0 | 5  | 0.34  | 0.37 |
| -4 | 0 | -5 | 0.58  | 0.36 |
| -4 | 0 | -5 | -0.13 | 0.23 |
| 4  | 0 | 5  | 0.12  | 0.32 |
| -4 | 0 | -5 | 0.38  | 0.23 |
| 5  | 0 | 5  | -0.41 | 0.34 |
| 5  | 0 | 5  | -0.64 | 0.31 |
| -5 | 0 | -5 | 0.13  | 0.24 |
| -5 | 0 | -5 | 0.53  | 0.31 |
| 6  | 0 | 5  | 2.65  | 0.46 |
| -6 | 0 | -5 | 3.14  | 0.40 |

|     |    |    |       |      |
|-----|----|----|-------|------|
| 6   | 0  | 5  | 2.05  | 0.43 |
| -6  | 0  | -5 | 2.63  | 0.34 |
| -7  | 0  | -5 | 1.99  | 0.38 |
| 7   | 0  | 5  | 2.09  | 0.44 |
| -7  | 0  | -5 | 1.91  | 0.35 |
| -8  | 0  | -5 | 1.55  | 0.37 |
| -8  | 0  | -5 | 1.22  | 0.38 |
| 8   | 0  | 5  | 1.73  | 0.41 |
| -9  | 0  | -5 | 1.16  | 0.39 |
| 9   | 0  | 5  | 1.49  | 0.43 |
| -9  | 0  | -5 | 1.66  | 0.47 |
| -10 | 0  | -5 | -0.14 | 0.38 |
| -10 | 0  | -5 | 0.20  | 0.42 |
| 10  | 0  | 5  | -0.21 | 0.42 |
| -11 | 0  | -5 | -0.25 | 0.45 |
| 11  | 0  | 5  | -0.16 | 0.43 |
| 14  | -1 | -5 | -0.12 | 0.48 |
| -14 | -1 | 5  | -0.48 | 0.47 |
| 14  | 1  | -5 | 0.37  | 0.53 |
| -14 | 1  | 5  | -0.09 | 0.47 |
| -13 | -1 | 5  | 0.66  | 0.43 |
| 13  | -1 | -5 | 0.42  | 0.49 |
| -13 | 1  | 5  | 0.32  | 0.40 |
| 13  | 1  | -5 | 0.41  | 0.46 |
| -12 | -1 | 5  | 0.44  | 0.38 |
| 12  | -1 | -5 | 1.37  | 0.49 |
| 12  | 1  | -5 | 0.99  | 0.45 |
| -12 | 1  | 5  | 0.86  | 0.42 |
| -11 | -1 | 5  | -0.57 | 0.29 |
| 11  | -1 | -5 | -0.21 | 0.30 |
| 11  | -1 | -5 | -0.09 | 0.39 |
| 11  | 1  | -5 | 0.15  | 0.37 |
| 11  | 1  | -5 | 0.02  | 0.33 |
| -11 | 1  | 5  | 0.03  | 0.32 |
| -10 | -1 | 5  | 1.38  | 0.42 |
| 10  | -1 | -5 | 1.02  | 0.43 |
| 10  | 1  | -5 | 1.11  | 0.31 |
| -10 | 1  | 5  | 1.37  | 0.40 |
| 10  | 1  | -5 | 1.28  | 0.41 |
| -9  | -1 | 5  | 4.06  | 0.47 |
| 9   | -1 | -5 | 5.40  | 0.55 |
| 9   | 1  | -5 | 5.23  | 0.45 |
| 9   | 1  | -5 | 4.03  | 0.49 |
| -9  | 1  | 5  | 3.98  | 0.46 |
| 8   | -1 | -5 | 0.00  | 0.33 |
| -8  | -1 | 5  | 0.41  | 0.31 |

-8 -1 5 0.15 0.36  
8 1 -5 0.49 0.35  
-8 1 5 0.47 0.31  
8 1 -5 0.10 0.35  
-8 1 5 -0.05 0.25  
8 1 -5 0.14 0.29  
7 -1 -5 0.40 0.35  
7 -1 -5 0.02 0.34  
-7 -1 5 0.37 0.32  
-7 -1 5 -0.36 0.30  
-7 1 5 0.05 0.23  
7 1 -5 0.29 0.31  
7 1 -5 0.39 0.27  
-7 1 5 -0.18 0.33  
-7 1 5 -0.18 0.29  
7 1 -5 0.13 0.31  
-6 -1 5 13.85 0.74  
6 -1 -5 15.23 0.70  
6 -1 -5 15.55 0.79  
-6 -1 5 16.13 0.67  
-6 -1 5 14.69 0.36  
6 1 -5 13.93 0.62  
-6 1 5 16.67 0.83  
-6 1 5 15.04 0.63  
-6 1 5 15.00 0.55  
6 1 -5 14.35 0.71  
-5 -1 5 10.64 0.44  
-5 -1 5 10.72 0.29  
-5 -1 5 10.47 0.61  
5 -1 -5 10.19 0.64  
-5 -1 5 10.77 0.52  
5 -1 -5 10.18 0.56  
5 1 -5 10.15 0.57  
-5 1 5 9.59 0.42  
-5 1 5 9.37 0.45  
-5 1 5 10.32 0.64  
5 1 -5 11.56 0.51  
4 -1 -5 5.96 0.18  
-4 -1 5 6.35 0.24  
-4 -1 5 5.99 0.44  
4 -1 -5 5.90 0.44  
-4 -1 5 5.65 0.36  
4 -1 -5 6.04 0.50  
-4 -1 5 6.19 0.34  
-4 1 5 6.14 0.36  
4 1 -5 5.95 0.38

-4 1 5 5.71 0.46  
4 1 -5 5.40 0.43  
-4 1 5 6.23 0.33  
-3 -1 5 5.27 0.39  
-3 -1 5 4.27 0.28  
-3 -1 5 4.66 0.34  
-3 -1 5 5.08 0.23  
3 -1 -5 4.93 0.40  
3 -1 -5 4.14 0.33  
3 -1 -5 4.23 0.20  
-3 1 5 5.20 0.29  
3 1 -5 5.12 0.35  
-3 1 5 5.41 0.43  
3 1 -5 4.18 0.35  
2 -1 -5 50.56 1.12  
-2 -1 5 48.49 1.10  
-2 -1 5 50.12 1.31  
2 -1 -5 48.96 1.38  
-2 -1 5 48.24 1.17  
-2 -1 5 50.52 1.13  
-2 1 5 51.26 1.10  
-2 1 5 50.71 1.38  
-2 1 5 49.54 1.11  
-2 1 5 49.41 1.12  
2 1 -5 50.02 1.33  
-2 1 5 49.00 1.23  
1 -1 -5 0.49 0.22  
-1 -1 5 1.21 0.21  
-1 -1 5 0.73 0.25  
-1 -1 5 0.76 0.16  
1 -1 -5 0.74 0.15  
-1 -1 5 0.57 0.18  
1 -1 -5 0.19 0.20  
1 1 -5 0.28 0.20  
-1 1 5 0.72 0.15  
-1 1 5 0.70 0.22  
1 1 -5 0.40 0.18  
-1 1 5 0.92 0.16  
0 -1 5 0.08 0.18  
0 -1 5 -0.02 0.11  
0 -1 -5 0.25 0.22  
0 -1 -5 0.17 0.20  
0 -1 -5 0.13 0.15  
0 -1 5 -0.39 0.18  
0 -1 5 -0.17 0.19  
0 -1 5 0.02 0.17

|    |    |    |       |      |
|----|----|----|-------|------|
| 0  | -1 | -5 | 0.10  | 0.11 |
| 0  | 1  | 5  | 0.01  | 0.22 |
| 0  | 1  | -5 | 0.14  | 0.19 |
| 0  | 1  | 5  | -0.05 | 0.22 |
| 1  | -1 | 5  | 16.18 | 0.59 |
| -1 | -1 | -5 | 16.24 | 0.69 |
| 1  | -1 | 5  | 15.54 | 0.68 |
| -1 | -1 | -5 | 16.21 | 0.57 |
| -1 | -1 | -5 | 17.37 | 0.48 |
| 1  | -1 | 5  | 16.55 | 0.58 |
| 1  | -1 | 5  | 16.81 | 0.43 |
| 1  | 1  | 5  | 16.30 | 0.60 |
| 1  | 1  | 5  | 16.62 | 0.70 |
| -1 | 1  | -5 | 16.57 | 0.67 |
| 1  | 1  | 5  | 15.98 | 0.63 |
| 1  | 1  | 5  | 16.41 | 0.47 |
| -1 | 1  | -5 | 17.24 | 0.56 |
| 2  | -1 | 5  | 42.90 | 1.14 |
| -2 | -1 | -5 | 42.12 | 1.01 |
| -2 | -1 | -5 | 43.82 | 1.14 |
| 2  | -1 | 5  | 41.79 | 1.16 |
| 2  | -1 | 5  | 42.34 | 0.88 |
| -2 | -1 | -5 | 43.01 | 1.31 |
| 2  | -1 | 5  | 42.37 | 1.29 |
| 2  | 1  | 5  | 43.38 | 0.95 |
| -2 | 1  | -5 | 43.80 | 1.29 |
| -2 | 1  | -5 | 44.31 | 1.10 |
| 2  | 1  | 5  | 42.05 | 1.18 |
| 2  | 1  | 5  | 43.07 | 1.32 |
| 2  | 1  | 5  | 42.38 | 1.15 |
| 3  | -1 | 5  | 5.64  | 0.52 |
| 3  | -1 | 5  | 6.33  | 0.49 |
| 3  | -1 | 5  | 6.18  | 0.45 |
| -3 | -1 | -5 | 5.00  | 0.48 |
| -3 | -1 | -5 | 5.85  | 0.42 |
| -3 | -1 | -5 | 6.04  | 0.35 |
| 3  | -1 | 5  | 5.81  | 0.20 |
| 3  | 1  | 5  | 5.98  | 0.53 |
| -3 | 1  | -5 | 6.70  | 0.54 |
| 3  | 1  | 5  | 6.93  | 0.52 |
| 3  | 1  | 5  | 6.76  | 0.29 |
| 3  | 1  | 5  | 6.29  | 0.51 |
| -3 | 1  | -5 | 6.46  | 0.40 |
| 4  | -1 | 5  | 5.99  | 0.51 |
| -4 | -1 | -5 | 6.05  | 0.59 |
| -4 | -1 | -5 | 6.34  | 0.40 |



|     |    |    |       |      |
|-----|----|----|-------|------|
| 4   | -1 | 5  | 6.03  | 0.56 |
| -4  | -1 | -5 | 5.93  | 0.48 |
| 4   | -1 | 5  | 5.42  | 0.46 |
| 4   | 1  | 5  | 5.42  | 0.51 |
| -4  | 1  | -5 | 5.54  | 0.43 |
| 4   | 1  | 5  | 5.98  | 0.29 |
| -4  | 1  | -5 | 5.59  | 0.55 |
| 4   | 1  | 5  | 5.31  | 0.52 |
| 4   | 1  | 5  | 5.75  | 0.57 |
| -5  | -1 | -5 | 7.02  | 0.50 |
| 5   | -1 | 5  | 6.95  | 0.60 |
| -5  | -1 | -5 | 6.73  | 0.45 |
| 5   | 1  | 5  | 4.98  | 0.49 |
| -5  | 1  | -5 | 5.97  | 0.47 |
| -6  | -1 | -5 | 10.48 | 0.55 |
| 6   | -1 | 5  | 11.79 | 0.72 |
| -6  | -1 | -5 | 10.94 | 0.66 |
| 6   | -1 | 5  | 10.78 | 0.72 |
| -6  | 1  | -5 | 12.05 | 0.63 |
| 6   | 1  | 5  | 11.04 | 0.69 |
| -6  | 1  | -5 | 11.52 | 0.62 |
| -7  | -1 | -5 | -0.25 | 0.25 |
| -7  | -1 | -5 | 0.01  | 0.33 |
| 7   | -1 | 5  | -0.05 | 0.36 |
| 7   | -1 | 5  | 0.01  | 0.42 |
| -7  | 1  | -5 | 0.43  | 0.33 |
| -7  | 1  | -5 | 0.07  | 0.29 |
| 7   | 1  | 5  | 0.51  | 0.32 |
| 8   | -1 | 5  | -0.26 | 0.40 |
| 8   | -1 | 5  | 0.26  | 0.38 |
| -8  | -1 | -5 | 0.24  | 0.36 |
| -8  | -1 | -5 | -0.22 | 0.27 |
| -8  | 1  | -5 | 0.72  | 0.33 |
| 8   | 1  | 5  | 0.07  | 0.34 |
| -8  | 1  | -5 | 0.09  | 0.35 |
| -9  | -1 | -5 | 0.07  | 0.38 |
| 9   | -1 | 5  | 0.72  | 0.44 |
| -9  | -1 | -5 | 0.51  | 0.35 |
| -9  | 1  | -5 | 0.17  | 0.39 |
| -9  | 1  | -5 | 0.98  | 0.39 |
| 9   | 1  | 5  | 0.76  | 0.43 |
| 10  | -1 | 5  | 0.41  | 0.46 |
| -10 | -1 | -5 | 0.59  | 0.45 |
| -10 | 1  | -5 | 0.98  | 0.42 |
| 10  | 1  | 5  | 0.53  | 0.45 |
| -10 | 1  | -5 | 0.93  | 0.47 |

|     |    |    |       |      |
|-----|----|----|-------|------|
| -11 | -1 | -5 | -0.64 | 0.45 |
| 11  | -1 | 5  | -0.56 | 0.46 |
| -11 | 1  | -5 | -0.19 | 0.40 |
| -11 | 1  | -5 | 0.29  | 0.49 |
| 11  | 1  | 5  | 0.26  | 0.46 |
| -14 | -2 | 5  | -0.63 | 0.46 |
| 14  | -2 | -5 | 0.70  | 0.53 |
| -14 | 2  | 5  | -0.34 | 0.46 |
| 14  | 2  | -5 | 0.17  | 0.49 |
| 13  | -2 | -5 | 0.74  | 0.49 |
| -13 | -2 | 5  | 0.88  | 0.48 |
| 13  | 2  | -5 | 0.05  | 0.45 |
| -13 | 2  | 5  | 0.14  | 0.40 |
| -12 | -2 | 5  | -0.15 | 0.35 |
| 12  | -2 | -5 | 0.47  | 0.45 |
| -12 | 2  | 5  | -0.66 | 0.36 |
| 12  | 2  | -5 | 0.55  | 0.42 |
| -11 | -2 | 5  | 0.73  | 0.41 |
| 11  | -2 | -5 | 0.82  | 0.44 |
| 11  | 2  | -5 | 0.44  | 0.40 |
| 11  | 2  | -5 | 1.11  | 0.38 |
| -11 | 2  | 5  | 0.68  | 0.35 |
| 10  | -2 | -5 | 2.20  | 0.49 |
| -10 | -2 | 5  | 2.02  | 0.46 |
| 10  | 2  | -5 | 2.79  | 0.42 |
| 10  | 2  | -5 | 2.37  | 0.43 |
| -10 | 2  | 5  | 2.13  | 0.39 |
| -9  | -2 | 5  | 0.97  | 0.35 |
| 9   | -2 | -5 | 0.51  | 0.38 |
| 9   | 2  | -5 | 0.70  | 0.32 |
| -9  | 2  | 5  | 0.77  | 0.35 |
| 9   | 2  | -5 | 0.76  | 0.36 |
| -9  | 2  | 5  | 1.13  | 0.29 |
| 8   | -2 | -5 | 8.04  | 0.63 |
| -8  | -2 | 5  | 7.45  | 0.65 |
| -8  | -2 | 5  | 6.67  | 0.58 |
| -8  | 2  | 5  | 6.34  | 0.50 |
| 8   | 2  | -5 | 6.26  | 0.52 |
| -8  | 2  | 5  | 6.84  | 0.43 |
| 8   | 2  | -5 | 5.98  | 0.56 |
| 8   | 2  | -5 | 6.98  | 0.52 |
| -7  | -2 | 5  | 18.13 | 0.75 |
| -7  | -2 | 5  | 17.15 | 0.84 |
| -7  | -2 | 5  | 18.18 | 0.52 |
| 7   | -2 | -5 | 18.18 | 0.82 |
| 7   | -2 | -5 | 18.25 | 0.93 |

|    |    |    |       |      |
|----|----|----|-------|------|
| 7  | 2  | -5 | 17.21 | 0.66 |
| 7  | 2  | -5 | 16.76 | 0.81 |
| -7 | 2  | 5  | 17.49 | 0.73 |
| 7  | 2  | -5 | 17.81 | 0.71 |
| -7 | 2  | 5  | 18.17 | 0.63 |
| -7 | 2  | 5  | 16.98 | 0.94 |
| -6 | -2 | 5  | 5.67  | 0.49 |
| 6  | -2 | -5 | 4.97  | 0.53 |
| -6 | -2 | 5  | 6.33  | 0.29 |
| -6 | -2 | 5  | 5.18  | 0.44 |
| 6  | -2 | -5 | 5.36  | 0.50 |
| 6  | 2  | -5 | 5.02  | 0.44 |
| -6 | 2  | 5  | 5.34  | 0.57 |
| -6 | 2  | 5  | 5.81  | 0.41 |
| 6  | 2  | -5 | 5.51  | 0.41 |
| 6  | 2  | -5 | 5.42  | 0.41 |
| -6 | 2  | 5  | 5.05  | 0.36 |
| -5 | -2 | 5  | 16.12 | 0.63 |
| -5 | -2 | 5  | 17.47 | 0.72 |
| 5  | -2 | -5 | 17.30 | 0.72 |
| -5 | -2 | 5  | 16.24 | 0.47 |
| 5  | -2 | -5 | 16.82 | 0.81 |
| -5 | 2  | 5  | 16.60 | 0.55 |
| 5  | 2  | -5 | 16.83 | 0.60 |
| -5 | 2  | 5  | 15.88 | 0.57 |
| 5  | 2  | -5 | 16.19 | 0.67 |
| 5  | 2  | -5 | 16.32 | 0.58 |
| -5 | 2  | 5  | 17.19 | 0.82 |
| -4 | -2 | 5  | 4.50  | 0.34 |
| 4  | -2 | -5 | 3.81  | 0.44 |
| 4  | -2 | -5 | 4.69  | 0.43 |
| -4 | -2 | 5  | 4.34  | 0.25 |
| 4  | -2 | -5 | 4.99  | 0.22 |
| -4 | -2 | 5  | 4.71  | 0.38 |
| 4  | 2  | -5 | 4.86  | 0.34 |
| 4  | 2  | -5 | 5.03  | 0.39 |
| 4  | 2  | -5 | 4.49  | 0.33 |
| -4 | 2  | 5  | 4.63  | 0.31 |
| -4 | 2  | 5  | 4.72  | 0.32 |
| -4 | 2  | 5  | 4.13  | 0.43 |
| -3 | -2 | 5  | 5.58  | 0.37 |
| 3  | -2 | -5 | 5.42  | 0.24 |
| -3 | -2 | 5  | 4.88  | 0.27 |
| 3  | -2 | -5 | 5.76  | 0.40 |
| -3 | -2 | 5  | 5.64  | 0.39 |
| 3  | -2 | -5 | 6.07  | 0.46 |

|    |    |    |       |      |
|----|----|----|-------|------|
| -3 | 2  | 5  | 6.27  | 0.48 |
| 3  | 2  | -5 | 5.69  | 0.38 |
| -3 | 2  | 5  | 5.46  | 0.31 |
| -3 | 2  | 5  | 5.53  | 0.29 |
| 3  | 2  | -5 | 5.39  | 0.33 |
| 2  | -2 | -5 | 21.66 | 0.82 |
| -2 | -2 | 5  | 21.01 | 0.67 |
| 2  | -2 | -5 | 21.64 | 0.58 |
| -2 | -2 | 5  | 20.25 | 0.60 |
| -2 | -2 | 5  | 21.74 | 0.58 |
| 2  | 2  | -5 | 21.41 | 0.67 |
| 2  | 2  | -5 | 21.66 | 0.70 |
| -2 | 2  | 5  | 21.54 | 0.56 |
| -2 | 2  | 5  | 21.06 | 0.60 |
| -2 | 2  | 5  | 20.76 | 0.78 |
| 1  | -2 | -5 | 6.73  | 0.47 |
| -1 | -2 | 5  | 7.12  | 0.35 |
| 1  | -2 | -5 | 7.72  | 0.49 |
| 1  | -2 | -5 | 6.93  | 0.33 |
| -1 | -2 | 5  | 6.60  | 0.36 |
| -1 | -2 | 5  | 7.81  | 0.38 |
| 1  | 2  | -5 | 7.49  | 0.40 |
| -1 | 2  | 5  | 7.25  | 0.27 |
| 1  | 2  | -5 | 7.14  | 0.39 |
| -1 | 2  | 5  | 7.27  | 0.43 |
| -1 | 2  | 5  | 7.16  | 0.33 |
| 0  | -2 | -5 | 11.07 | 0.32 |
| 0  | -2 | -5 | 10.90 | 0.55 |
| 0  | -2 | 5  | 10.61 | 0.45 |
| 0  | -2 | -5 | 11.45 | 0.57 |
| 0  | -2 | 5  | 11.13 | 0.45 |
| 0  | -2 | -5 | 10.63 | 0.45 |
| 0  | -2 | 5  | 11.02 | 0.35 |
| 0  | 2  | -5 | 10.64 | 0.49 |
| 0  | 2  | 5  | 10.61 | 0.48 |
| 0  | 2  | 5  | 10.31 | 0.40 |
| 1  | -2 | 5  | 29.46 | 0.86 |
| 1  | -2 | 5  | 29.91 | 0.96 |
| -1 | -2 | -5 | 31.36 | 0.71 |
| 1  | -2 | 5  | 30.76 | 0.86 |
| -1 | -2 | -5 | 31.73 | 0.89 |
| -1 | -2 | -5 | 28.77 | 1.00 |
| -1 | 2  | -5 | 31.89 | 0.86 |
| -1 | 2  | -5 | 29.85 | 0.95 |
| 1  | 2  | 5  | 30.60 | 1.03 |
| 1  | 2  | 5  | 29.41 | 0.90 |

2 -2 5 21.62 0.83  
-2 -2 -5 21.90 0.87  
-2 -2 -5 21.16 0.72  
2 -2 5 21.23 0.75  
2 -2 5 21.20 0.73  
-2 -2 -5 21.82 0.57  
-2 2 -5 21.25 0.49  
-2 2 -5 21.87 0.71  
2 2 5 22.62 0.60  
2 2 5 22.68 0.88  
-2 2 -5 22.46 0.84  
2 2 5 21.62 0.76  
-3 -2 -5 2.17 0.35  
3 -2 5 2.14 0.34  
-3 -2 -5 2.02 0.23  
3 -2 5 1.98 0.37  
-3 -2 -5 1.39 0.37  
3 -2 5 1.98 0.34  
3 2 5 1.82 0.22  
3 2 5 1.51 0.33  
3 2 5 1.64 0.34  
-3 2 -5 1.98 0.35  
-3 2 -5 1.81 0.30  
4 -2 5 12.72 0.67  
4 -2 5 12.93 0.67  
-4 -2 -5 13.25 0.51  
4 -2 5 12.15 0.73  
-4 -2 -5 12.61 0.65  
-4 -2 -5 12.57 0.80  
4 2 5 12.74 0.44  
4 2 5 13.51 0.70  
-4 2 -5 13.20 0.80  
-4 2 -5 11.33 0.59  
-5 -2 -5 5.62 0.52  
5 -2 5 6.86 0.57  
-5 -2 -5 5.94 0.39  
5 -2 5 7.21 0.59  
5 2 5 6.07 0.58  
-5 2 -5 5.45 0.48  
-6 -2 -5 2.24 0.32  
-6 -2 -5 2.06 0.36  
6 -2 5 2.00 0.42  
6 -2 5 2.71 0.45  
6 2 5 1.81 0.42  
-6 2 -5 1.29 0.34  
7 -2 5 5.70 0.59

7 -2 5 6.53 0.66  
-7 -2 -5 5.94 0.55  
-7 -2 -5 5.44 0.46  
-7 2 -5 5.54 0.52  
-7 2 -5 5.90 0.54  
7 2 5 4.67 0.56  
8 -2 5 0.80 0.45  
-8 -2 -5 -0.04 0.29  
8 -2 5 0.03 0.36  
-8 -2 -5 0.68 0.39  
-8 2 -5 0.33 0.36  
-8 2 -5 0.29 0.34  
8 2 5 0.31 0.34  
-9 -2 -5 0.33 0.41  
9 -2 5 0.98 0.44  
9 -2 5 0.76 0.46  
-9 2 -5 0.40 0.40  
-9 2 -5 0.20 0.36  
9 2 5 0.82 0.43  
-10 -2 -5 -0.41 0.44  
10 -2 5 0.36 0.46  
10 2 5 0.33 0.47  
-10 2 -5 -0.22 0.40  
-10 2 -5 0.08 0.41  
-11 -2 -5 -0.16 0.48  
11 -2 5 -0.22 0.49  
-11 2 -5 0.15 0.42  
-11 2 -5 0.06 0.57  
11 2 5 0.42 0.49  
14 -3 -5 0.03 0.51  
-14 -3 5 -0.04 0.50  
-14 3 5 -0.39 0.46  
14 3 -5 0.66 0.50  
-13 -3 5 1.04 0.51  
13 -3 -5 1.02 0.51  
13 3 -5 0.81 0.47  
-13 3 5 0.76 0.43  
-12 -3 5 -0.29 0.38  
12 -3 -5 0.76 0.48  
12 3 -5 0.09 0.32  
12 3 -5 0.25 0.40  
-12 3 5 -0.25 0.37  
11 -3 -5 1.35 0.48  
-11 -3 5 0.68 0.42  
11 3 -5 1.13 0.40  
-11 3 5 0.87 0.39

|     |    |    |      |      |
|-----|----|----|------|------|
| 11  | 3  | -5 | 0.57 | 0.35 |
| 10  | -3 | -5 | 2.35 | 0.49 |
| -10 | -3 | 5  | 3.41 | 0.48 |
| -10 | 3  | 5  | 2.29 | 0.40 |
| -10 | 3  | 5  | 3.13 | 0.37 |
| 10  | 3  | -5 | 2.70 | 0.44 |
| 10  | 3  | -5 | 3.39 | 0.42 |
| 9   | -3 | -5 | 6.44 | 0.60 |
| -9  | -3 | 5  | 6.56 | 0.57 |
| -9  | 3  | 5  | 7.55 | 0.48 |
| 9   | 3  | -5 | 6.37 | 0.52 |
| -9  | 3  | 5  | 5.73 | 0.51 |
| 9   | 3  | -5 | 7.46 | 0.58 |
| 8   | -3 | -5 | 6.44 | 0.61 |
| -8  | -3 | 5  | 7.07 | 0.60 |
| -8  | -3 | 5  | 6.31 | 0.61 |
| -8  | 3  | 5  | 7.26 | 0.44 |
| -8  | 3  | 5  | 7.43 | 0.56 |
| 8   | 3  | -5 | 6.80 | 0.50 |
| 8   | 3  | -5 | 6.88 | 0.52 |
| 8   | 3  | -5 | 6.97 | 0.57 |
| -7  | -3 | 5  | 5.72 | 0.52 |
| 7   | -3 | -5 | 6.24 | 0.57 |
| -7  | -3 | 5  | 5.29 | 0.52 |
| -7  | -3 | 5  | 5.55 | 0.36 |
| 7   | 3  | -5 | 5.82 | 0.47 |
| -7  | 3  | 5  | 5.28 | 0.43 |
| -7  | 3  | 5  | 4.74 | 0.40 |
| -7  | 3  | 5  | 6.33 | 0.66 |
| 7   | 3  | -5 | 5.15 | 0.47 |
| 7   | 3  | -5 | 5.47 | 0.43 |
| -6  | -3 | 5  | 1.30 | 0.33 |
| 6   | -3 | -5 | 1.18 | 0.40 |
| -6  | -3 | 5  | 1.65 | 0.24 |
| 6   | -3 | -5 | 0.75 | 0.37 |
| -6  | -3 | 5  | 1.03 | 0.31 |
| -6  | 3  | 5  | 0.66 | 0.37 |
| 6   | 3  | -5 | 0.82 | 0.29 |
| 6   | 3  | -5 | 0.84 | 0.26 |
| -6  | 3  | 5  | 1.10 | 0.28 |
| 6   | 3  | -5 | 1.39 | 0.28 |
| -6  | 3  | 5  | 1.51 | 0.27 |
| -5  | -3 | 5  | 7.14 | 0.35 |
| 5   | -3 | -5 | 7.63 | 0.57 |
| 5   | -3 | -5 | 6.87 | 0.25 |
| 5   | -3 | -5 | 6.62 | 0.59 |

-5 -3 5 7.19 0.49  
-5 -3 5 7.24 0.50  
-5 3 5 8.09 0.64  
5 3 -5 7.28 0.46  
-5 3 5 6.56 0.40  
5 3 -5 6.61 0.41  
5 3 -5 7.35 0.40  
-5 3 5 7.24 0.41  
4 -3 -5 17.55 0.73  
4 -3 -5 18.28 0.52  
-4 -3 5 18.34 0.56  
-4 -3 5 18.95 0.66  
4 -3 -5 19.58 0.86  
-4 -3 5 19.12 0.69  
-4 3 5 19.40 0.84  
-4 3 5 19.24 0.62  
4 3 -5 18.32 0.57  
4 3 -5 18.86 0.64  
3 -3 -5 19.63 0.56  
3 -3 -5 19.32 0.73  
-3 -3 5 19.36 0.62  
-3 -3 5 20.05 0.60  
3 -3 -5 20.62 0.84  
-3 -3 5 20.99 0.69  
-3 3 5 20.37 0.56  
-3 3 5 17.43 0.77  
-3 3 5 19.39 0.60  
3 3 -5 20.10 0.57  
3 3 -5 19.42 0.64  
-2 -3 5 4.84 0.33  
2 -3 -5 4.79 0.45  
2 -3 -5 4.90 0.41  
2 -3 -5 5.08 0.29  
-2 -3 5 5.13 0.36  
-2 3 5 5.26 0.45  
2 3 -5 5.32 0.32  
2 3 -5 5.41 0.34  
-2 3 5 4.85 0.31  
-2 3 5 5.23 0.24  
2 3 -5 5.04 0.32  
-1 -3 5 37.13 1.01  
-1 -3 5 36.98 0.98  
-1 -3 5 36.53 0.92  
1 -3 -5 39.64 0.98  
1 -3 -5 39.30 1.20  
1 3 -5 36.84 1.02



|    |    |    |       |      |
|----|----|----|-------|------|
| -1 | 3  | 5  | 40.08 | 1.06 |
| -1 | 3  | 5  | 38.73 | 0.82 |
| 1  | 3  | -5 | 39.13 | 1.01 |
| 1  | 3  | -5 | 38.19 | 0.90 |
| -1 | 3  | 5  | 38.31 | 0.94 |
| 0  | -3 | -5 | 87.43 | 2.24 |
| 0  | -3 | -5 | 92.57 | 1.75 |
| 0  | -3 | 5  | 86.70 | 2.10 |
| 0  | -3 | 5  | 87.42 | 2.00 |
| 0  | -3 | -5 | 89.50 | 2.26 |
| 0  | -3 | -5 | 88.26 | 1.99 |
| 0  | -3 | 5  | 86.79 | 1.94 |
| 0  | 3  | 5  | 87.47 | 1.84 |
| 0  | 3  | -5 | 85.34 | 1.77 |
| 0  | 3  | -5 | 90.14 | 2.10 |
| 0  | 3  | 5  | 85.71 | 2.04 |
| 1  | -3 | 5  | 8.16  | 0.44 |
| -1 | -3 | -5 | 8.34  | 0.24 |
| -1 | -3 | -5 | 8.64  | 0.55 |
| -1 | -3 | -5 | 7.98  | 0.44 |
| -1 | 3  | -5 | 8.09  | 0.29 |
| 1  | 3  | 5  | 8.32  | 0.39 |
| 1  | 3  | 5  | 7.57  | 0.46 |
| -1 | 3  | -5 | 7.99  | 0.48 |
| -1 | 3  | -5 | 8.36  | 0.45 |
| -2 | -3 | -5 | 32.14 | 1.10 |
| -2 | -3 | -5 | 31.60 | 0.94 |
| -2 | -3 | -5 | 32.12 | 0.71 |
| 2  | -3 | 5  | 31.21 | 0.95 |
| 2  | -3 | 5  | 31.14 | 0.91 |
| 2  | -3 | 5  | 30.97 | 1.01 |
| -2 | 3  | -5 | 30.56 | 0.66 |
| 2  | 3  | 5  | 30.67 | 0.98 |
| -2 | 3  | -5 | 30.95 | 1.01 |
| 2  | 3  | 5  | 30.56 | 1.09 |
| -2 | 3  | -5 | 27.21 | 0.90 |
| 3  | -3 | 5  | 5.79  | 0.47 |
| 3  | -3 | 5  | 5.90  | 0.48 |
| -3 | -3 | -5 | 4.60  | 0.51 |
| -3 | -3 | -5 | 5.22  | 0.45 |
| 3  | -3 | 5  | 5.20  | 0.48 |
| -3 | -3 | -5 | 4.66  | 0.28 |
| 3  | 3  | 5  | 4.41  | 0.31 |
| -3 | 3  | -5 | 4.70  | 0.48 |
| 3  | 3  | 5  | 5.91  | 0.51 |
| -3 | 3  | -5 | 4.31  | 0.41 |

3 3 5 4.36 0.48  
4 -3 5 0.45 0.36  
4 -3 5 0.85 0.34  
-4 -3 -5 0.72 0.20  
-4 -3 -5 0.98 0.30  
-4 -3 -5 0.36 0.36  
4 -3 5 0.73 0.33  
4 3 5 0.95 0.39  
-4 3 -5 0.89 0.28  
-4 3 -5 0.72 0.33  
4 3 5 0.53 0.21  
5 -3 5 1.36 0.40  
-5 -3 -5 1.03 0.32  
-5 -3 -5 1.13 0.24  
5 -3 5 1.25 0.38  
-5 3 -5 0.40 0.31  
5 3 5 1.09 0.41  
5 3 5 1.70 0.24  
6 -3 5 2.87 0.47  
6 -3 5 2.98 0.46  
-6 -3 -5 2.92 0.42  
-6 -3 -5 2.92 0.34  
6 3 5 2.36 0.42  
-6 3 -5 2.22 0.38  
-7 -3 -5 1.55 0.41  
7 -3 5 1.25 0.41  
7 -3 5 1.14 0.40  
-7 3 -5 1.28 0.36  
7 3 5 0.63 0.39  
-8 -3 -5 0.21 0.32  
8 -3 5 0.21 0.34  
8 3 5 -0.22 0.35  
-8 3 -5 0.44 0.32  
-8 3 -5 -0.15 0.28  
9 -3 5 0.72 0.45  
-9 -3 -5 0.40 0.42  
9 -3 5 0.49 0.43  
-9 3 -5 -0.01 0.38  
9 3 5 0.41 0.43  
-9 3 -5 0.72 0.42  
-10 -3 -5 0.08 0.47  
10 -3 5 -0.17 0.52  
10 -3 5 0.01 0.44  
10 3 5 1.12 0.52  
-10 3 -5 0.36 0.45  
-10 3 -5 0.73 0.46

-11 -3 -5 -0.36 0.48  
-11 3 -5 -0.13 0.46  
-14 -4 5 0.55 0.52  
-13 -4 5 0.39 0.43  
13 -4 -5 0.55 0.51  
-13 4 5 0.14 0.46  
12 -4 -5 0.01 0.43  
-12 -4 5 -0.36 0.44  
12 4 -5 0.71 0.43  
-12 4 5 -0.18 0.35  
12 4 -5 -0.39 0.37  
-11 -4 5 0.93 0.45  
11 -4 -5 1.01 0.46  
11 4 -5 0.85 0.39  
11 4 -5 0.64 0.34  
-11 4 5 1.36 0.43  
-10 -4 5 0.65 0.35  
10 -4 -5 0.37 0.45  
-10 4 5 0.71 0.37  
10 4 -5 0.82 0.33  
-10 4 5 0.85 0.29  
10 4 -5 0.37 0.35  
-9 -4 5 1.39 0.41  
-9 -4 5 0.15 0.39  
9 -4 -5 0.95 0.43  
-9 4 5 0.26 0.29  
9 4 -5 0.24 0.32  
-9 4 5 1.30 0.29  
9 4 -5 1.19 0.37  
-8 -4 5 4.99 0.53  
-8 -4 5 5.61 0.55  
-8 4 5 6.16 0.45  
8 4 -5 7.10 0.51  
8 4 -5 5.78 0.52  
-8 4 5 6.01 0.48  
8 4 -5 6.97 0.51  
7 -4 -5 15.79 0.84  
-7 -4 5 16.29 0.63  
-7 -4 5 15.54 0.74  
-7 -4 5 15.70 0.79  
-7 4 5 16.59 0.69  
7 4 -5 16.31 0.73  
7 4 -5 17.14 0.72  
-7 4 5 15.88 0.64  
7 4 -5 17.37 0.65  
6 -4 -5 3.73 0.47

-6 -4 5 5.32 0.39  
-6 -4 5 4.65 0.43  
-6 -4 5 4.64 0.44  
6 -4 -5 4.68 0.53  
6 4 -5 5.02 0.39  
6 4 -5 5.29 0.37  
-6 4 5 4.52 0.58  
6 4 -5 5.00 0.41  
-6 4 5 4.33 0.37  
-6 4 5 4.60 0.39  
5 -4 -5 18.26 0.51  
-5 -4 5 16.27 0.68  
-5 -4 5 17.43 0.67  
-5 -4 5 16.63 0.60  
5 -4 -5 16.40 0.88  
5 -4 -5 14.97 0.76  
5 4 -5 16.12 0.62  
-5 4 5 17.84 0.62  
-5 4 5 16.34 0.87  
-5 4 5 16.62 0.59  
5 4 -5 16.45 0.61  
5 4 -5 17.25 0.54  
-4 -4 5 26.93 0.81  
4 -4 -5 28.13 0.76  
4 -4 -5 29.29 0.98  
-4 -4 5 28.15 0.90  
-4 -4 5 28.24 0.80  
4 -4 -5 28.39 1.10  
-4 4 5 29.26 0.78  
4 4 -5 28.31 0.79  
4 4 -5 26.78 0.70  
-4 4 5 28.23 0.80  
4 4 -5 29.06 0.82  
-4 4 5 28.88 1.08  
3 -4 -5 32.43 0.86  
-3 -4 5 33.59 0.96  
3 -4 -5 32.61 1.14  
3 -4 -5 32.20 1.02  
3 4 -5 31.67 0.77  
3 4 -5 32.18 0.85  
-3 4 5 30.56 1.11  
-3 4 5 33.53 0.88  
-3 4 5 32.09 0.80  
3 4 -5 32.24 0.86  
-2 -4 5 34.19 0.97  
2 -4 -5 33.51 1.02

|    |    |    |       |      |
|----|----|----|-------|------|
| 2  | -4 | -5 | 36.21 | 1.18 |
| 2  | -4 | -5 | 34.28 | 0.91 |
| -2 | -4 | 5  | 34.32 | 0.94 |
| 2  | 4  | -5 | 32.55 | 0.88 |
| 2  | 4  | -5 | 34.61 | 0.87 |
| -2 | 4  | 5  | 34.03 | 0.78 |
| -2 | 4  | 5  | 33.99 | 1.12 |
| 2  | 4  | -5 | 33.00 | 0.80 |
| -2 | 4  | 5  | 34.08 | 0.90 |
| 2  | 4  | -5 | 35.95 | 0.88 |
| -1 | -4 | 5  | 51.56 | 1.16 |
| 1  | -4 | -5 | 50.28 | 1.51 |
| 1  | -4 | -5 | 51.96 | 1.27 |
| -1 | -4 | 5  | 48.45 | 1.29 |
| -1 | -4 | 5  | 50.07 | 1.28 |
| -1 | 4  | 5  | 53.77 | 1.04 |
| 1  | 4  | -5 | 50.97 | 1.16 |
| -1 | 4  | 5  | 50.11 | 1.20 |
| -1 | 4  | 5  | 53.39 | 1.34 |
| 1  | 4  | -5 | 51.23 | 1.25 |
| 1  | 4  | -5 | 50.93 | 1.27 |
| 0  | -4 | 5  | 35.79 | 0.98 |
| 0  | -4 | 5  | 33.74 | 0.88 |
| 0  | -4 | -5 | 35.04 | 1.16 |
| 0  | -4 | -5 | 34.44 | 0.98 |
| 0  | -4 | 5  | 35.23 | 0.99 |
| 0  | -4 | -5 | 34.76 | 1.14 |
| 0  | 4  | 5  | 34.70 | 0.91 |
| 0  | 4  | -5 | 34.45 | 0.96 |
| 0  | 4  | 5  | 35.68 | 1.03 |
| 0  | 4  | -5 | 34.49 | 0.83 |
| -1 | -4 | -5 | 9.13  | 0.58 |
| -1 | -4 | -5 | 7.98  | 0.61 |
| 1  | -4 | 5  | 9.01  | 0.44 |
| 1  | -4 | 5  | 8.21  | 0.49 |
| -1 | -4 | -5 | 10.19 | 0.51 |
| 1  | -4 | 5  | 8.76  | 0.52 |
| -1 | 4  | -5 | 8.87  | 0.48 |
| 1  | 4  | 5  | 8.45  | 0.41 |
| -1 | 4  | -5 | 8.03  | 0.46 |
| -1 | 4  | -5 | 8.62  | 0.32 |
| 1  | 4  | 5  | 8.59  | 0.55 |
| 2  | -4 | 5  | 28.95 | 0.94 |
| -2 | -4 | -5 | 30.75 | 1.09 |
| -2 | -4 | -5 | 28.94 | 0.63 |
| -2 | -4 | -5 | 28.05 | 0.91 |

|    |    |    |       |      |
|----|----|----|-------|------|
| 2  | 4  | 5  | 30.66 | 1.09 |
| 2  | 4  | 5  | 28.39 | 0.93 |
| -2 | 4  | -5 | 27.82 | 0.65 |
| -2 | 4  | -5 | 27.66 | 0.96 |
| 2  | 4  | 5  | 28.84 | 0.79 |
| -2 | 4  | -5 | 28.57 | 0.91 |
| 3  | -4 | 5  | 5.13  | 0.46 |
| -3 | -4 | -5 | 5.16  | 0.26 |
| -3 | -4 | -5 | 4.84  | 0.43 |
| -3 | -4 | -5 | 4.94  | 0.52 |
| 3  | -4 | 5  | 6.55  | 0.48 |
| 3  | -4 | 5  | 5.95  | 0.51 |
| 3  | 4  | 5  | 5.19  | 0.50 |
| -3 | 4  | -5 | 4.26  | 0.42 |
| -3 | 4  | -5 | 4.85  | 0.47 |
| 3  | 4  | 5  | 4.79  | 0.53 |
| 4  | -4 | 5  | 1.87  | 0.39 |
| -4 | -4 | -5 | 2.51  | 0.37 |
| 4  | -4 | 5  | 3.05  | 0.41 |
| -4 | -4 | -5 | 2.70  | 0.25 |
| 4  | -4 | 5  | 2.99  | 0.44 |
| 4  | 4  | 5  | 2.66  | 0.46 |
| -4 | 4  | -5 | 1.93  | 0.38 |
| -4 | 4  | -5 | 2.81  | 0.41 |
| 4  | 4  | 5  | 2.97  | 0.32 |
| 5  | -4 | 5  | 0.61  | 0.33 |
| -5 | -4 | -5 | 0.23  | 0.32 |
| 5  | -4 | 5  | 0.85  | 0.33 |
| -5 | 4  | -5 | 0.57  | 0.30 |
| 5  | 4  | 5  | 0.61  | 0.39 |
| 5  | 4  | 5  | 0.68  | 0.24 |
| 6  | -4 | 5  | 4.16  | 0.49 |
| 6  | -4 | 5  | 5.36  | 0.54 |
| -6 | -4 | -5 | 4.31  | 0.48 |
| -6 | 4  | -5 | 4.48  | 0.49 |
| 6  | 4  | 5  | 5.03  | 0.53 |
| -7 | -4 | -5 | 1.87  | 0.45 |
| 7  | -4 | 5  | 1.37  | 0.41 |
| 7  | -4 | 5  | 1.33  | 0.41 |
| -7 | 4  | -5 | 0.39  | 0.32 |
| 7  | 4  | 5  | 1.18  | 0.43 |
| -8 | -4 | -5 | 0.06  | 0.38 |
| 8  | -4 | 5  | 0.30  | 0.39 |
| 8  | -4 | 5  | 0.09  | 0.34 |
| 8  | 4  | 5  | 0.39  | 0.36 |
| -8 | 4  | -5 | 0.33  | 0.38 |

9 -4 5 0.85 0.48  
-9 -4 -5 -0.25 0.38  
9 -4 5 0.20 0.51  
9 4 5 0.20 0.44  
-9 4 -5 0.85 0.43  
-9 4 -5 -0.48 0.39  
10 -4 5 0.04 0.46  
-10 -4 -5 -0.33 0.46  
10 -4 5 0.65 0.56  
-10 4 -5 1.16 0.49  
10 4 5 0.27 0.47  
-10 4 -5 0.23 0.45  
-11 -4 -5 0.07 0.55  
-11 4 -5 0.10 0.48  
-13 -5 5 0.08 0.48  
13 -5 -5 0.04 0.52  
-13 5 5 -0.20 0.40  
12 -5 -5 0.10 0.48  
-12 -5 5 -0.01 0.43  
12 5 -5 -0.11 0.40  
-12 5 5 0.28 0.37  
11 -5 -5 -0.13 0.45  
-11 -5 5 0.54 0.37  
-11 5 5 0.37 0.38  
11 5 -5 -0.04 0.37  
10 -5 -5 1.03 0.42  
-10 -5 5 1.11 0.38  
10 5 -5 0.75 0.38  
10 5 -5 1.19 0.41  
-10 5 5 0.94 0.38  
-10 5 5 0.58 0.28  
-9 -5 5 0.81 0.36  
9 -5 -5 0.93 0.39  
-9 5 5 0.53 0.34  
9 5 -5 1.37 0.34  
9 5 -5 0.97 0.33  
-9 5 5 1.05 0.30  
-8 -5 5 8.02 0.58  
-8 -5 5 7.84 0.64  
8 -5 -5 7.89 0.66  
8 5 -5 8.91 0.51  
8 5 -5 6.93 0.53  
-8 5 5 8.55 0.52  
-8 5 5 7.70 0.52  
-7 -5 5 13.85 0.73  
-7 -5 5 11.65 0.68

|    |    |    |       |      |
|----|----|----|-------|------|
| -7 | -5 | 5  | 12.14 | 0.60 |
| 7  | -5 | -5 | 12.95 | 0.80 |
| -7 | 5  | 5  | 12.80 | 0.60 |
| 7  | 5  | -5 | 12.22 | 0.55 |
| 7  | 5  | -5 | 12.62 | 0.63 |
| -7 | 5  | 5  | 12.06 | 0.61 |
| 7  | 5  | -5 | 12.65 | 0.67 |
| -6 | -5 | 5  | 3.49  | 0.38 |
| 6  | -5 | -5 | 3.09  | 0.49 |
| -6 | -5 | 5  | 4.16  | 0.44 |
| -6 | -5 | 5  | 3.66  | 0.37 |
| 6  | -5 | -5 | 3.74  | 0.28 |
| 6  | 5  | -5 | 3.96  | 0.35 |
| 6  | 5  | -5 | 3.74  | 0.31 |
| -6 | 5  | 5  | 3.32  | 0.35 |
| -6 | 5  | 5  | 4.44  | 0.60 |
| -6 | 5  | 5  | 3.08  | 0.33 |
| 6  | 5  | -5 | 3.93  | 0.41 |
| -5 | -5 | 5  | 0.77  | 0.34 |
| 5  | -5 | -5 | 0.21  | 0.36 |
| 5  | -5 | -5 | 0.42  | 0.34 |
| -5 | -5 | 5  | 0.49  | 0.28 |
| -5 | -5 | 5  | 0.35  | 0.22 |
| 5  | -5 | -5 | 0.53  | 0.22 |
| -5 | 5  | 5  | 0.36  | 0.35 |
| -5 | 5  | 5  | 0.66  | 0.25 |
| 5  | 5  | -5 | 0.46  | 0.18 |
| 5  | 5  | -5 | 0.35  | 0.19 |
| 5  | 5  | -5 | 0.19  | 0.28 |
| 4  | -5 | -5 | 2.49  | 0.46 |
| -4 | -5 | 5  | 2.86  | 0.22 |
| 4  | -5 | -5 | 2.48  | 0.30 |
| 4  | -5 | -5 | 3.13  | 0.43 |
| -4 | -5 | 5  | 2.61  | 0.36 |
| 4  | 5  | -5 | 2.90  | 0.19 |
| -4 | 5  | 5  | 2.60  | 0.43 |
| -4 | 5  | 5  | 2.82  | 0.32 |
| -4 | 5  | 5  | 2.30  | 0.25 |
| 4  | 5  | -5 | 2.67  | 0.20 |
| 4  | 5  | -5 | 2.32  | 0.32 |
| 3  | -5 | -5 | 15.44 | 0.60 |
| 3  | -5 | -5 | 14.02 | 0.69 |
| -3 | -5 | 5  | 13.60 | 0.59 |
| 3  | -5 | -5 | 14.97 | 0.80 |
| -3 | -5 | 5  | 13.95 | 0.65 |
| -3 | 5  | 5  | 14.07 | 0.75 |



|    |    |    |       |      |
|----|----|----|-------|------|
| -3 | 5  | 5  | 15.12 | 0.46 |
| -3 | 5  | 5  | 13.81 | 0.56 |
| 3  | 5  | -5 | 14.25 | 0.58 |
| 2  | -5 | -5 | 11.90 | 0.54 |
| 2  | -5 | -5 | 11.92 | 0.63 |
| -2 | -5 | 5  | 12.14 | 0.56 |
| 2  | -5 | -5 | 13.35 | 0.73 |
| -2 | -5 | 5  | 11.81 | 0.60 |
| 2  | 5  | -5 | 11.25 | 0.37 |
| 2  | 5  | -5 | 12.44 | 0.36 |
| 2  | 5  | -5 | 11.65 | 0.50 |
| -2 | 5  | 5  | 11.91 | 0.67 |
| -2 | 5  | 5  | 12.56 | 0.36 |
| -2 | 5  | 5  | 11.97 | 0.52 |
| 2  | 5  | -5 | 11.95 | 0.34 |
| 1  | -5 | -5 | 7.13  | 0.46 |
| 1  | -5 | -5 | 7.40  | 0.58 |
| -1 | -5 | 5  | 6.77  | 0.49 |
| -1 | -5 | 5  | 6.63  | 0.47 |
| -1 | -5 | 5  | 7.04  | 0.29 |
| 1  | 5  | -5 | 6.78  | 0.37 |
| 1  | 5  | -5 | 6.72  | 0.33 |
| -1 | 5  | 5  | 7.58  | 0.41 |
| -1 | 5  | 5  | 6.75  | 0.51 |
| 1  | 5  | -5 | 6.75  | 0.32 |
| 0  | -5 | 5  | 39.27 | 0.96 |
| 0  | -5 | -5 | 39.08 | 1.26 |
| 0  | -5 | 5  | 38.82 | 1.05 |
| 0  | -5 | 5  | 39.65 | 1.12 |
| 0  | -5 | -5 | 38.91 | 1.28 |
| 0  | -5 | -5 | 39.38 | 1.11 |
| 0  | 5  | 5  | 39.26 | 1.13 |
| 0  | 5  | -5 | 39.52 | 0.94 |
| 0  | 5  | -5 | 38.95 | 1.04 |
| 0  | 5  | 5  | 38.15 | 1.01 |
| 0  | 5  | -5 | 38.52 | 1.13 |
| 1  | -5 | 5  | 5.22  | 0.47 |
| -1 | -5 | -5 | 5.09  | 0.46 |
| -1 | -5 | -5 | 5.71  | 0.53 |
| 1  | -5 | 5  | 5.62  | 0.43 |
| -1 | -5 | -5 | 4.68  | 0.47 |
| 1  | -5 | 5  | 4.92  | 0.36 |
| -1 | 5  | -5 | 4.85  | 0.41 |
| 1  | 5  | 5  | 5.37  | 0.46 |
| 1  | 5  | 5  | 5.28  | 0.38 |
| -1 | 5  | -5 | 5.40  | 0.31 |

-1 5 -5 4.55 0.37  
2 -5 5 7.96 0.53  
-2 -5 -5 8.53 0.53  
2 -5 5 6.90 0.52  
-2 -5 -5 6.99 0.57  
2 -5 5 9.65 0.50  
2 5 5 7.68 0.57  
-2 5 -5 8.54 0.54  
2 5 5 7.40 0.47  
-2 5 -5 7.96 0.32  
-2 5 -5 7.16 0.50  
3 -5 5 12.05 0.64  
-3 -5 -5 13.22 0.78  
-3 -5 -5 12.59 0.65  
3 5 5 13.88 0.71  
3 5 5 12.97 0.54  
-3 5 -5 12.81 0.67  
-3 5 -5 12.47 0.70  
3 5 5 13.77 1.04  
-4 -5 -5 8.42 0.63  
4 -5 5 6.64 0.57  
4 -5 5 7.66 0.57  
4 -5 5 6.85 0.55  
-4 5 -5 8.22 0.64  
4 5 5 7.41 0.61  
-4 5 -5 6.32 0.53  
-5 -5 -5 5.12 0.51  
5 -5 5 5.59 0.54  
5 -5 5 7.85 0.58  
5 5 5 6.75 0.44  
-5 5 -5 6.92 0.59  
5 5 5 6.52 0.60  
-6 -5 -5 0.64 0.34  
6 -5 5 0.25 0.33  
6 -5 5 0.51 0.33  
6 5 5 -0.10 0.36  
-6 5 -5 0.70 0.37  
7 -5 5 3.97 0.54  
-7 -5 -5 4.20 0.56  
7 -5 5 4.52 0.54  
-7 5 -5 4.35 0.55  
7 5 5 4.47 0.58  
8 -5 5 1.02 0.44  
-8 -5 -5 0.68 0.44  
8 -5 5 0.67 0.42  
-8 5 -5 1.26 0.45

8 5 5 0.95 0.45  
-9 -5 -5 1.03 0.53  
9 -5 5 0.53 0.45  
9 -5 5 0.65 0.46  
-9 5 -5 0.65 0.45  
9 5 5 0.76 0.47  
-10 -5 -5 0.02 0.52  
10 -5 5 0.06 0.51  
10 -5 5 0.39 0.55  
-10 5 -5 1.20 0.48  
10 5 5 -0.20 0.50  
-10 5 -5 -0.01 0.47  
-11 -5 -5 -0.61 0.55  
-13 -6 5 0.63 0.50  
13 -6 -5 0.47 0.54  
-13 6 5 0.20 0.48  
-12 -6 5 0.20 0.45  
12 -6 -5 -0.21 0.46  
12 6 -5 -0.14 0.44  
-12 6 5 -0.39 0.41  
11 -6 -5 0.43 0.49  
-11 -6 5 0.23 0.36  
-11 6 5 0.13 0.38  
11 6 -5 -0.09 0.38  
10 -6 -5 -0.02 0.39  
-10 -6 5 -0.20 0.31  
10 6 -5 0.01 0.36  
-10 6 5 0.16 0.35  
-9 -6 5 -0.16 0.34  
9 -6 -5 -0.19 0.35  
-9 6 5 0.35 0.28  
9 6 -5 -0.09 0.33  
-9 6 5 0.43 0.33  
8 -6 -5 1.49 0.42  
-8 -6 5 1.39 0.35  
-8 -6 5 1.26 0.40  
-8 6 5 1.11 0.33  
-8 6 5 0.41 0.25  
8 6 -5 0.19 0.30  
-7 -6 5 9.41 0.60  
-7 -6 5 9.36 0.61  
7 -6 -5 8.22 0.68  
-7 6 5 9.18 0.55  
-7 6 5 10.98 0.58  
7 6 -5 8.97 0.57  
-6 -6 5 -0.11 0.34

6 -6 -5 -0.35 0.34  
-6 -6 5 0.55 0.32  
6 -6 -5 0.04 0.23  
6 6 -5 0.10 0.28  
-6 6 5 0.53 0.25  
-6 6 5 0.57 0.28  
5 -6 -5 1.64 0.29  
-5 -6 5 1.07 0.33  
5 -6 -5 1.61 0.44  
-5 6 5 1.56 0.44  
5 6 -5 1.60 0.19  
5 6 -5 1.30 0.34  
-5 6 5 1.42 0.30  
-5 6 5 1.22 0.24  
-4 -6 5 4.90 0.45  
4 -6 -5 4.98 0.56  
4 -6 -5 5.18 0.42  
4 -6 -5 4.71 0.49  
-4 -6 5 6.11 0.51  
4 6 -5 4.44 0.40  
-4 6 5 5.36 0.57  
-4 6 5 5.70 0.35  
-4 6 5 5.51 0.43  
-3 -6 5 16.79 0.71  
-3 -6 5 16.90 0.72  
3 -6 -5 18.08 0.91  
3 -6 -5 17.99 0.80  
3 -6 -5 17.31 0.73  
-3 6 5 17.36 0.66  
-3 6 5 17.17 0.52  
3 6 -5 17.08 0.64  
-3 6 5 17.41 0.86  
2 -6 -5 9.95 0.58  
-2 -6 5 9.72 0.60  
2 -6 -5 11.07 0.72  
2 -6 -5 9.14 0.61  
-2 -6 5 9.44 0.54  
-2 6 5 10.36 0.33  
-2 6 5 9.29 0.64  
-2 6 5 9.25 0.50  
2 6 -5 10.13 0.48  
-1 -6 5 1.63 0.33  
1 -6 -5 1.42 0.37  
1 -6 -5 2.29 0.36  
-1 -6 5 1.98 0.16  
-1 -6 5 1.72 0.36

|    |    |    |      |      |
|----|----|----|------|------|
| 1  | 6  | -5 | 1.91 | 0.25 |
| 1  | 6  | -5 | 1.69 | 0.17 |
| 1  | 6  | -5 | 1.39 | 0.16 |
| -1 | 6  | 5  | 1.53 | 0.29 |
| 0  | -6 | 5  | 3.10 | 0.28 |
| 0  | -6 | 5  | 3.57 | 0.43 |
| 0  | -6 | 5  | 3.32 | 0.26 |
| 0  | -6 | -5 | 3.66 | 0.40 |
| 0  | -6 | -5 | 2.00 | 0.39 |
| 0  | -6 | -5 | 3.50 | 0.43 |
| 0  | 6  | 5  | 3.39 | 0.40 |
| 0  | 6  | -5 | 2.85 | 0.40 |
| 0  | 6  | -5 | 2.96 | 0.28 |
| 0  | 6  | 5  | 2.73 | 0.34 |
| 0  | 6  | -5 | 3.06 | 0.27 |
| 1  | -6 | 5  | 5.95 | 0.50 |
| -1 | -6 | -5 | 6.93 | 0.51 |
| 1  | -6 | 5  | 6.84 | 0.45 |
| 1  | -6 | 5  | 7.07 | 0.40 |
| -1 | -6 | -5 | 5.91 | 0.55 |
| -1 | -6 | -5 | 6.95 | 0.58 |
| -1 | 6  | -5 | 5.71 | 0.48 |
| 1  | 6  | 5  | 6.72 | 0.44 |
| -1 | 6  | -5 | 6.71 | 0.45 |
| -1 | 6  | -5 | 6.75 | 0.37 |
| 1  | 6  | 5  | 6.44 | 0.52 |
| 2  | -6 | 5  | 3.64 | 0.43 |
| 2  | -6 | 5  | 4.95 | 0.39 |
| 2  | -6 | 5  | 4.53 | 0.41 |
| -2 | -6 | -5 | 4.03 | 0.44 |
| -2 | -6 | -5 | 3.73 | 0.48 |
| -2 | -6 | -5 | 3.46 | 0.45 |
| 2  | 6  | 5  | 4.71 | 0.41 |
| 2  | 6  | 5  | 3.60 | 0.45 |
| -2 | 6  | -5 | 3.75 | 0.27 |
| -2 | 6  | -5 | 3.22 | 0.37 |
| -2 | 6  | -5 | 3.67 | 0.42 |
| 3  | -6 | 5  | 2.42 | 0.38 |
| 3  | -6 | 5  | 2.79 | 0.37 |
| -3 | -6 | -5 | 2.15 | 0.39 |
| 3  | -6 | 5  | 2.12 | 0.40 |
| 3  | 6  | 5  | 2.22 | 0.45 |
| 3  | 6  | 5  | 2.37 | 0.33 |
| -3 | 6  | -5 | 2.36 | 0.40 |
| -3 | 6  | -5 | 2.83 | 0.40 |
| 4  | -6 | 5  | 4.71 | 0.53 |

-4 -6 -5 3.82 0.48  
-4 6 -5 3.48 0.43  
4 6 5 4.10 0.52  
4 6 5 4.20 0.41  
-4 6 -5 3.77 0.48  
-5 -6 -5 2.59 0.43  
5 -6 5 4.51 0.49  
5 -6 5 4.67 0.51  
-5 6 -5 4.23 0.53  
5 6 5 4.25 0.54  
6 -6 5 2.66 0.46  
-6 -6 -5 2.85 0.48  
6 -6 5 3.40 0.48  
6 6 5 2.82 0.50  
6 6 5 3.63 0.40  
-6 6 -5 2.71 0.48  
7 -6 5 -0.27 0.35  
7 -6 5 0.29 0.39  
-7 -6 -5 -0.29 0.33  
-7 6 -5 0.56 0.38  
7 6 5 0.35 0.43  
8 -6 5 2.04 0.49  
-8 -6 -5 0.22 0.44  
8 -6 5 0.72 0.39  
8 6 5 0.87 0.46  
-8 6 -5 1.53 0.48  
-9 -6 -5 0.09 0.49  
9 -6 5 0.13 0.45  
9 -6 5 0.05 0.45  
-9 6 -5 -0.21 0.45  
9 6 5 0.01 0.48  
-10 -6 -5 -0.78 0.50  
10 -6 5 0.05 0.50  
10 6 5 -0.19 0.50  
-10 6 -5 -0.29 0.47  
-13 -7 5 0.74 0.51  
13 7 -5 0.15 0.54  
-13 7 5 0.31 0.49  
-12 -7 5 -0.09 0.45  
12 -7 -5 0.26 0.52  
12 7 -5 -0.08 0.39  
-12 7 5 -0.30 0.42  
11 -7 -5 0.06 0.48  
-11 -7 5 0.35 0.43  
11 7 -5 -0.59 0.39  
-11 7 5 -0.08 0.39

|     |    |    |       |      |
|-----|----|----|-------|------|
| 10  | -7 | -5 | 1.34  | 0.50 |
| -10 | -7 | 5  | 1.82  | 0.46 |
| 10  | 7  | -5 | 1.42  | 0.44 |
| -10 | 7  | 5  | 1.86  | 0.45 |
| -9  | -7 | 5  | -0.41 | 0.33 |
| 9   | -7 | -5 | 0.15  | 0.41 |
| -9  | 7  | 5  | 0.07  | 0.32 |
| 9   | 7  | -5 | -0.47 | 0.28 |
| -9  | 7  | 5  | 0.18  | 0.28 |
| -8  | -7 | 5  | 2.62  | 0.47 |
| 8   | -7 | -5 | 2.74  | 0.50 |
| -8  | -7 | 5  | 2.78  | 0.43 |
| -8  | 7  | 5  | 4.31  | 0.45 |
| -8  | 7  | 5  | 2.88  | 0.41 |
| 8   | 7  | -5 | 3.47  | 0.43 |
| -7  | -7 | 5  | 0.88  | 0.34 |
| -7  | -7 | 5  | 1.23  | 0.39 |
| 7   | -7 | -5 | 1.11  | 0.45 |
| 7   | 7  | -5 | 0.81  | 0.32 |
| -7  | 7  | 5  | 0.96  | 0.28 |
| -7  | 7  | 5  | 1.25  | 0.32 |
| -6  | -7 | 5  | 8.40  | 0.63 |
| 6   | -7 | -5 | 8.03  | 0.47 |
| 6   | -7 | -5 | 8.82  | 0.66 |
| -6  | 7  | 5  | 7.95  | 0.52 |
| 6   | 7  | -5 | 6.36  | 0.51 |
| 5   | -7 | -5 | 6.27  | 0.45 |
| -5  | -7 | 5  | 5.70  | 0.54 |
| 5   | -7 | -5 | 5.29  | 0.59 |
| -5  | -7 | 5  | 6.02  | 0.52 |
| -5  | 7  | 5  | 7.00  | 0.50 |
| -5  | 7  | 5  | 6.33  | 0.41 |
| 5   | 7  | -5 | 5.32  | 0.47 |
| 4   | -7 | -5 | 12.84 | 0.65 |
| 4   | -7 | -5 | 10.95 | 0.97 |
| -4  | -7 | 5  | 11.98 | 0.68 |
| -4  | -7 | 5  | 12.63 | 0.66 |
| 4   | -7 | -5 | 13.97 | 0.73 |
| -4  | 7  | 5  | 12.64 | 0.49 |
| 4   | 7  | -5 | 12.04 | 0.60 |
| -4  | 7  | 5  | 11.84 | 0.79 |
| -4  | 7  | 5  | 14.03 | 0.63 |
| -3  | -7 | 5  | 1.16  | 0.37 |
| 3   | -7 | -5 | 0.47  | 0.39 |
| 3   | -7 | -5 | 0.82  | 0.39 |
| 3   | -7 | -5 | 1.19  | 0.35 |

-3 -7 5 0.77 0.37  
3 7 -5 0.30 0.29  
-3 7 5 0.55 0.17  
-3 7 5 0.93 0.32  
-3 7 5 0.52 0.35  
-2 -7 5 19.64 0.80  
2 -7 -5 19.14 0.97  
2 -7 -5 21.86 0.87  
2 -7 -5 21.41 0.86  
-2 -7 5 20.82 0.84  
-2 7 5 20.35 0.75  
2 7 -5 20.07 0.71  
-2 7 5 20.91 0.93  
1 -7 -5 0.71 0.35  
1 -7 -5 0.56 0.34  
-1 -7 5 0.89 0.38  
1 -7 -5 1.03 0.33  
-1 -7 5 0.71 0.35  
1 -7 -5 1.15 0.38  
-1 7 5 0.82 0.29  
1 7 -5 1.02 0.25  
0 -7 -5 13.80 0.76  
0 -7 5 13.81 0.51  
0 -7 -5 13.34 0.81  
0 -7 5 13.54 0.68  
0 -7 -5 13.97 0.74  
0 7 -5 12.12 0.64  
0 7 5 13.19 0.69  
0 7 -5 13.33 0.55  
0 7 -5 12.82 0.50  
0 7 5 13.31 0.64  
-1 -7 -5 9.34 0.67  
1 -7 5 8.36 0.59  
1 -7 5 9.17 0.50  
1 -7 5 9.84 0.45  
-1 -7 -5 9.13 0.67  
-1 -7 -5 9.75 0.69  
1 7 5 8.51 0.52  
-1 7 -5 8.48 0.49  
-1 7 -5 9.02 0.46  
-1 7 -5 9.76 0.61  
1 7 5 8.22 0.61  
2 -7 5 1.75 0.39  
2 -7 5 2.76 0.35  
-2 -7 -5 1.64 0.39  
2 -7 5 3.35 0.34



-2 -7 -5 2.28 0.45  
-2 7 -5 2.17 0.26  
2 7 5 1.60 0.40  
-2 7 -5 2.74 0.36  
2 7 5 2.74 0.39  
-2 7 -5 2.94 0.40  
3 -7 5 2.21 0.33  
-3 -7 -5 1.64 0.43  
3 -7 5 1.97 0.44  
3 -7 5 2.18 0.36  
-3 7 -5 1.83 0.39  
-3 7 -5 1.77 0.36  
3 7 5 2.12 0.43  
3 7 5 1.74 0.34  
4 -7 5 2.07 0.41  
4 -7 5 1.71 0.39  
-4 -7 -5 1.13 0.42  
4 -7 5 2.29 0.37  
4 7 5 2.64 0.38  
-4 7 -5 1.60 0.39  
4 7 5 1.90 0.44  
-4 7 -5 1.36 0.36  
-5 -7 -5 0.63 0.36  
5 -7 5 1.09 0.41  
5 7 5 0.43 0.38  
-5 7 -5 0.98 0.35  
5 7 5 0.36 0.29  
6 -7 5 0.49 0.35  
-6 -7 -5 0.45 0.41  
6 -7 5 0.41 0.39  
-6 7 -5 0.18 0.33  
6 7 5 -0.22 0.35  
-7 -7 -5 0.89 0.42  
7 -7 5 0.95 0.43  
7 -7 5 1.61 0.45  
7 7 5 0.85 0.44  
-7 7 -5 0.66 0.41  
8 -7 5 0.90 0.46  
-8 -7 -5 0.62 0.52  
8 -7 5 0.72 0.45  
8 7 5 1.16 0.49  
-8 7 -5 0.59 0.42  
9 -7 5 0.44 0.48  
-9 -7 -5 -0.83 0.50  
9 -7 5 -0.33 0.43  
-9 7 -5 0.37 0.50

9 7 5 0.10 0.47  
-10 -7 -5 -0.83 0.55  
10 -7 5 0.01 0.50  
10 -7 5 -0.22 0.49  
10 7 5 0.79 0.54  
-13 -8 5 -0.12 0.48  
13 8 -5 0.30 0.53  
12 -8 -5 0.33 0.54  
-12 -8 5 0.41 0.47  
12 8 -5 -0.22 0.47  
-12 8 5 0.28 0.46  
11 -8 -5 1.02 0.53  
-11 -8 5 0.66 0.46  
-11 8 5 0.71 0.41  
11 8 -5 1.15 0.49  
10 -8 -5 0.36 0.45  
-10 -8 5 -0.31 0.38  
-10 8 5 -0.15 0.37  
10 8 -5 -0.09 0.35  
-9 -8 5 1.17 0.42  
9 -8 -5 1.90 0.51  
-9 8 5 1.77 0.38  
9 8 -5 1.76 0.41  
-9 8 5 1.31 0.39  
8 -8 -5 0.74 0.39  
-8 -8 5 1.04 0.35  
-8 -8 5 1.80 0.64  
-8 8 5 1.19 0.34  
-8 8 5 1.41 0.33  
8 8 -5 1.30 0.38  
7 -8 -5 3.53 0.54  
-7 -8 5 3.49 0.46  
-7 8 5 3.23 0.41  
7 8 -5 3.69 0.45  
-7 8 5 3.83 0.42  
6 -8 -5 1.53 0.32  
6 -8 -5 2.54 0.48  
-6 -8 5 1.86 0.42  
-6 -8 5 1.77 0.40  
-6 8 5 2.46 0.40  
6 8 -5 1.24 0.35  
-5 -8 5 2.86 0.45  
-5 -8 5 2.22 0.39  
5 -8 -5 3.02 0.50  
5 -8 -5 3.94 0.42  
-5 8 5 3.19 0.40

|    |    |    |       |      |
|----|----|----|-------|------|
| -5 | 8  | 5  | 2.94  | 0.32 |
| 5  | 8  | -5 | 2.90  | 0.39 |
| 4  | -8 | -5 | 6.66  | 0.63 |
| 4  | -8 | -5 | 5.60  | 0.50 |
| -4 | -8 | 5  | 6.06  | 0.56 |
| -4 | -8 | 5  | 5.18  | 0.54 |
| 4  | 8  | -5 | 4.68  | 0.46 |
| -4 | 8  | 5  | 6.64  | 0.52 |
| -4 | 8  | 5  | 5.40  | 0.38 |
| 3  | -8 | -5 | 17.14 | 0.84 |
| -3 | -8 | 5  | 17.01 | 0.77 |
| 3  | -8 | -5 | 17.19 | 0.80 |
| -3 | -8 | 5  | 16.95 | 0.82 |
| -3 | 8  | 5  | 18.03 | 0.74 |
| 3  | 8  | -5 | 17.51 | 0.72 |
| -3 | 8  | 5  | 16.24 | 0.91 |
| -2 | -8 | 5  | 0.68  | 0.40 |
| -2 | -8 | 5  | 1.83  | 0.41 |
| 2  | -8 | -5 | 0.47  | 0.37 |
| 2  | -8 | -5 | 1.23  | 0.43 |
| 2  | -8 | -5 | 0.78  | 0.40 |
| 2  | 8  | -5 | 1.28  | 0.30 |
| -2 | 8  | 5  | 0.27  | 0.32 |
| -2 | 8  | 5  | 0.60  | 0.31 |
| 1  | -8 | -5 | 9.05  | 0.65 |
| 1  | -8 | -5 | 9.71  | 0.69 |
| 1  | -8 | -5 | 8.97  | 0.67 |
| -1 | -8 | 5  | 9.57  | 0.68 |
| 1  | -8 | -5 | 8.79  | 0.72 |
| -1 | 8  | 5  | 10.00 | 0.58 |
| 1  | 8  | -5 | 8.14  | 0.49 |
| 0  | -8 | 5  | 7.32  | 0.62 |
| 0  | -8 | -5 | 7.54  | 0.62 |
| 0  | -8 | -5 | 8.49  | 0.68 |
| 0  | -8 | -5 | 8.19  | 0.69 |
| 0  | 8  | 5  | 7.78  | 0.60 |
| 0  | 8  | -5 | 7.82  | 0.48 |
| 0  | 8  | -5 | 6.50  | 0.54 |
| 0  | 8  | 5  | 7.14  | 0.52 |
| -1 | -8 | -5 | 2.34  | 0.44 |
| 1  | -8 | 5  | 3.00  | 0.43 |
| -1 | -8 | -5 | 3.16  | 0.46 |
| -1 | 8  | -5 | 3.15  | 0.42 |
| 1  | 8  | 5  | 3.13  | 0.40 |
| -1 | 8  | -5 | 2.85  | 0.33 |
| 1  | 8  | 5  | 3.30  | 0.46 |

2 -8 5 2.55 0.46  
-2 -8 -5 3.34 0.49  
2 8 5 3.19 0.43  
-2 8 -5 2.54 0.42  
-2 8 -5 3.50 0.37  
2 8 5 3.92 0.47  
3 -8 5 0.37 0.34  
-3 -8 -5 0.46 0.39  
-3 8 -5 0.47 0.31  
3 8 5 -0.22 0.35  
3 8 5 0.51 0.27  
-4 -8 -5 3.28 0.55  
4 -8 5 2.51 0.44  
4 -8 5 4.11 0.44  
4 8 5 3.02 0.40  
4 8 5 3.43 0.51  
-4 8 -5 3.19 0.45  
-5 -8 -5 2.39 0.52  
5 -8 5 1.55 0.43  
5 -8 5 2.31 0.43  
5 8 5 1.65 0.34  
-5 8 -5 1.17 0.38  
5 8 5 1.81 0.44  
-6 -8 -5 -0.69 0.33  
6 -8 5 0.38 0.39  
6 -8 5 0.12 0.39  
6 8 5 -0.07 0.38  
-6 8 -5 -0.38 0.31  
6 8 5 0.12 0.27  
-7 -8 -5 0.67 0.45  
7 -8 5 0.41 0.42  
7 -8 5 0.75 0.39  
7 8 5 0.43 0.44  
-7 8 -5 0.29 0.36  
-8 -8 -5 -0.08 0.45  
8 -8 5 0.11 0.40  
8 -8 5 0.07 0.42  
8 8 5 -0.17 0.44  
-8 8 -5 -0.41 0.44  
9 -8 5 0.23 0.47  
-9 -8 -5 -0.17 0.57  
9 -8 5 0.43 0.46  
9 8 5 -0.14 0.48  
-9 8 -5 -0.07 0.49  
10 -8 5 0.16 0.54  
10 -8 5 1.10 0.60

|     |    |    |       |      |
|-----|----|----|-------|------|
| 10  | 8  | 5  | 0.44  | 0.62 |
| -12 | -9 | 5  | 0.51  | 0.48 |
| 12  | -9 | -5 | 0.09  | 0.56 |
| 12  | 9  | -5 | 0.02  | 0.44 |
| -12 | 9  | 5  | -0.09 | 0.47 |
| -11 | -9 | 5  | 0.29  | 0.43 |
| 11  | -9 | -5 | -0.37 | 0.51 |
| -11 | 9  | 5  | -0.26 | 0.37 |
| 11  | 9  | -5 | 0.40  | 0.41 |
| 10  | -9 | -5 | 0.40  | 0.51 |
| -10 | -9 | 5  | 0.51  | 0.43 |
| 10  | 9  | -5 | 1.44  | 0.45 |
| -10 | 9  | 5  | 0.43  | 0.42 |
| -9  | -9 | 5  | -0.03 | 0.37 |
| 9   | -9 | -5 | 0.10  | 0.44 |
| -9  | 9  | 5  | -0.06 | 0.34 |
| 9   | 9  | -5 | 0.42  | 0.41 |
| -8  | -9 | 5  | 1.34  | 0.43 |
| 8   | -9 | -5 | 1.93  | 0.50 |
| 8   | 9  | -5 | 0.91  | 0.38 |
| -8  | 9  | 5  | 1.51  | 0.39 |
| -8  | 9  | 5  | 2.26  | 0.41 |
| -7  | -9 | 5  | 0.86  | 0.42 |
| -7  | -9 | 5  | 0.76  | 0.38 |
| 7   | -9 | -5 | 0.65  | 0.44 |
| -7  | 9  | 5  | 0.96  | 0.50 |
| 7   | 9  | -5 | 1.02  | 0.37 |
| -7  | 9  | 5  | 1.96  | 0.40 |
| -6  | -9 | 5  | 2.67  | 0.49 |
| 6   | -9 | -5 | 2.17  | 0.50 |
| -6  | -9 | 5  | 2.23  | 0.44 |
| 6   | -9 | -5 | 2.34  | 0.42 |
| -6  | 9  | 5  | 2.53  | 0.36 |
| -6  | 9  | 5  | 1.98  | 0.41 |
| 6   | 9  | -5 | 2.58  | 0.44 |
| 5   | -9 | -5 | 4.90  | 0.47 |
| -5  | -9 | 5  | 4.67  | 0.49 |
| 5   | -9 | -5 | 4.80  | 0.58 |
| -5  | -9 | 5  | 5.14  | 0.57 |
| -5  | 9  | 5  | 4.79  | 0.40 |
| 5   | 9  | -5 | 3.76  | 0.49 |
| -5  | 9  | 5  | 5.07  | 0.49 |
| 4   | -9 | -5 | 1.68  | 0.40 |
| -4  | -9 | 5  | 2.17  | 0.42 |
| -4  | -9 | 5  | 1.61  | 0.45 |
| 4   | -9 | -5 | 1.10  | 0.43 |

-4 9 5 1.73 0.38  
4 9 -5 1.91 0.40  
-3 -9 5 9.25 0.66  
-3 -9 5 9.67 0.71  
3 -9 -5 9.89 0.69  
3 -9 -5 8.91 0.69  
3 9 -5 9.57 0.59  
-3 9 5 9.25 0.60  
-2 -9 5 3.72 0.49  
2 -9 -5 3.46 0.49  
-2 -9 5 2.61 0.43  
2 -9 -5 2.40 0.46  
-2 9 5 3.80 0.44  
2 9 -5 2.96 0.39  
-1 -9 5 0.37 0.34  
1 -9 -5 1.90 0.40  
1 -9 -5 1.80 0.50  
1 9 -5 0.99 0.29  
1 9 -5 0.58 0.31  
-1 9 5 1.23 0.37  
0 -9 -5 4.48 0.52  
0 -9 5 3.90 0.51  
0 -9 -5 3.86 0.57  
0 9 -5 3.23 0.38  
0 9 -5 3.26 0.43  
0 9 5 3.31 0.42  
1 -9 5 3.93 0.47  
-1 -9 -5 4.56 0.60  
1 9 5 4.12 0.45  
-1 9 -5 4.49 0.49  
-1 9 -5 3.14 0.36  
1 9 5 3.56 0.47  
2 -9 5 0.75 0.36  
-2 -9 -5 1.61 0.47  
2 9 5 0.80 0.32  
-2 9 -5 1.40 0.37  
2 9 5 0.88 0.39  
3 -9 5 1.55 0.40  
-3 -9 -5 2.21 0.49  
3 9 5 1.73 0.39  
-3 9 -5 1.99 0.40  
3 9 5 1.50 0.41  
4 -9 5 0.61 0.37  
-4 -9 -5 1.13 0.44  
4 9 5 1.30 0.37  
-4 9 -5 0.81 0.38

4 9 5 0.94 0.41  
-5 -9 -5 -0.28 0.38  
5 -9 5 0.19 0.35  
-5 9 -5 -0.14 0.31  
5 9 5 0.04 0.38  
5 9 5 0.24 0.33  
-6 -9 -5 0.34 0.48  
6 -9 5 0.50 0.37  
-6 9 -5 0.56 0.43  
6 9 5 0.35 0.34  
6 9 5 0.64 0.45  
7 -9 5 -0.08 0.43  
-7 -9 -5 -0.39 0.51  
-7 9 -5 -0.16 0.36  
7 9 5 -0.19 0.46  
-8 -9 -5 -0.02 0.49  
8 -9 5 -0.09 0.45  
8 9 5 -0.27 0.46  
-8 9 -5 0.15 0.47  
9 -9 5 0.20 0.51  
-9 -9 -5 -0.48 0.59  
9 9 5 0.59 0.79  
-11 -10 5 0.48 0.45  
11 -10 -5 0.36 0.54  
11 10 -5 0.04 0.49  
-11 10 5 0.32 0.48  
-10 -10 5 -0.05 0.41  
10 -10 -5 0.18 0.50  
10 10 -5 0.00 0.42  
-10 10 5 0.06 0.41  
9 -10 -5 -0.44 0.46  
-9 -10 5 0.16 0.39  
9 10 -5 0.49 0.42  
-9 10 5 -0.07 0.37  
-8 -10 5 0.56 0.38  
8 -10 -5 -0.52 0.42  
-8 -10 5 0.49 0.45  
-8 10 5 0.59 0.38  
8 10 -5 -0.12 0.36  
-8 10 5 0.04 0.32  
-7 -10 5 2.29 0.42  
7 -10 -5 1.36 0.47  
-7 -10 5 2.45 0.50  
7 10 -5 1.92 0.46  
-7 10 5 2.44 0.46  
6 -10 -5 0.30 0.40

|    |     |    |       |      |
|----|-----|----|-------|------|
| -6 | -10 | 5  | 0.32  | 0.36 |
| -6 | -10 | 5  | 0.16  | 0.34 |
| 6  | 10  | -5 | 0.52  | 0.35 |
| -6 | 10  | 5  | 0.11  | 0.32 |
| 5  | -10 | -5 | 6.23  | 0.65 |
| -5 | -10 | 5  | 6.22  | 0.59 |
| 5  | -10 | -5 | 6.19  | 0.55 |
| -5 | -10 | 5  | 5.70  | 0.63 |
| -5 | 10  | 5  | 6.09  | 0.58 |
| 5  | 10  | -5 | 5.61  | 0.55 |
| -4 | -10 | 5  | 3.75  | 0.48 |
| 4  | -10 | -5 | 4.30  | 0.56 |
| -4 | -10 | 5  | 3.79  | 0.52 |
| 4  | -10 | -5 | 4.70  | 0.53 |
| 4  | 10  | -5 | 4.02  | 0.50 |
| -4 | 10  | 5  | 4.76  | 0.55 |
| 3  | -10 | -5 | 0.16  | 0.39 |
| -3 | -10 | 5  | 0.16  | 0.35 |
| 3  | -10 | -5 | -0.04 | 0.38 |
| -3 | -10 | 5  | 0.01  | 0.32 |
| 3  | 10  | -5 | 0.27  | 0.31 |
| -3 | 10  | 5  | -0.07 | 0.30 |
| 2  | -10 | -5 | 3.91  | 0.51 |
| -2 | -10 | 5  | 2.97  | 0.48 |
| 2  | -10 | -5 | 2.38  | 0.46 |
| 2  | 10  | -5 | 2.91  | 0.41 |
| -2 | 10  | 5  | 2.94  | 0.43 |
| 1  | -10 | -5 | 1.74  | 0.51 |
| 1  | -10 | -5 | 0.70  | 0.37 |
| -1 | -10 | 5  | 1.13  | 0.39 |
| 1  | 10  | -5 | 0.90  | 0.37 |
| -1 | 10  | 5  | 0.70  | 0.34 |
| 1  | 10  | -5 | 0.71  | 0.29 |
| 0  | -10 | -5 | 0.38  | 0.47 |
| 0  | -10 | 5  | -0.11 | 0.32 |
| 0  | -10 | -5 | 0.16  | 0.37 |
| 0  | 10  | -5 | -0.40 | 0.28 |
| 0  | 10  | -5 | 0.09  | 0.33 |
| 0  | 10  | 5  | 0.08  | 0.29 |
| -1 | -10 | -5 | 4.42  | 0.63 |
| 1  | -10 | 5  | 2.68  | 0.46 |
| -1 | 10  | -5 | 3.63  | 0.40 |
| 1  | 10  | 5  | 4.21  | 0.48 |
| -1 | 10  | -5 | 4.15  | 0.50 |
| 2  | -10 | 5  | 0.76  | 0.42 |
| -2 | -10 | -5 | 0.00  | 0.45 |



|     |     |    |       |      |
|-----|-----|----|-------|------|
| 2   | 10  | 5  | 0.35  | 0.38 |
| -2  | 10  | -5 | 0.27  | 0.36 |
| 2   | 10  | 5  | 1.35  | 0.40 |
| -3  | -10 | -5 | 0.61  | 0.43 |
| 3   | -10 | 5  | 0.66  | 0.37 |
| 3   | 10  | 5  | 1.03  | 0.38 |
| 3   | 10  | 5  | 0.22  | 0.40 |
| -3  | 10  | -5 | 1.22  | 0.42 |
| 4   | -10 | 5  | 0.91  | 0.39 |
| -4  | -10 | -5 | 1.36  | 0.52 |
| -4  | 10  | -5 | 1.37  | 0.44 |
| 4   | 10  | 5  | 0.56  | 0.35 |
| 4   | 10  | 5  | 1.38  | 0.44 |
| -5  | -10 | -5 | 0.53  | 0.52 |
| 5   | -10 | 5  | 0.44  | 0.43 |
| 5   | 10  | 5  | 0.25  | 0.42 |
| 5   | 10  | 5  | -0.03 | 0.35 |
| -5  | 10  | -5 | 0.83  | 0.44 |
| 6   | -10 | 5  | 1.34  | 0.50 |
| -6  | -10 | -5 | 0.11  | 0.45 |
| -6  | 10  | -5 | 0.18  | 0.44 |
| 6   | 10  | 5  | 0.56  | 0.39 |
| 6   | 10  | 5  | 0.25  | 0.47 |
| 7   | -10 | 5  | 0.06  | 0.46 |
| -7  | -10 | -5 | -0.07 | 0.56 |
| 7   | 10  | 5  | -0.11 | 0.38 |
| -7  | 10  | -5 | -0.06 | 0.40 |
| -8  | -10 | -5 | -0.43 | 0.51 |
| 8   | -10 | 5  | 0.21  | 0.47 |
| -8  | 10  | -5 | -0.11 | 0.42 |
| 11  | -11 | -5 | -0.58 | 0.56 |
| -11 | 11  | 5  | -0.18 | 0.46 |
| -10 | -11 | 5  | 0.39  | 0.46 |
| 10  | -11 | -5 | 0.02  | 0.55 |
| -10 | 11  | 5  | 0.43  | 0.45 |
| 10  | 11  | -5 | -0.35 | 0.49 |
| -9  | -11 | 5  | -0.08 | 0.40 |
| 9   | -11 | -5 | 0.11  | 0.49 |
| 9   | 11  | -5 | -0.30 | 0.45 |
| -8  | -11 | 5  | 0.18  | 0.46 |
| -8  | -11 | 5  | 0.84  | 0.44 |
| 8   | -11 | -5 | 0.46  | 0.50 |
| 8   | 11  | -5 | 0.81  | 0.49 |
| -8  | 11  | 5  | 0.49  | 0.43 |
| -7  | -11 | 5  | 0.36  | 0.46 |
| -7  | -11 | 5  | 0.92  | 0.40 |

|    |     |    |       |      |
|----|-----|----|-------|------|
| 7  | -11 | -5 | 0.46  | 0.46 |
| 7  | 11  | -5 | 0.11  | 0.38 |
| -7 | 11  | 5  | -0.16 | 0.31 |
| -6 | -11 | 5  | 1.19  | 0.41 |
| -6 | -11 | 5  | 2.12  | 0.52 |
| 6  | -11 | -5 | 2.67  | 0.55 |
| 6  | 11  | -5 | 2.76  | 0.53 |
| -6 | 11  | 5  | 2.34  | 0.44 |
| -5 | -11 | 5  | 1.51  | 0.42 |
| 5  | -11 | -5 | 1.72  | 0.41 |
| -5 | -11 | 5  | 0.80  | 0.45 |
| 5  | -11 | -5 | 2.15  | 0.51 |
| -5 | 11  | 5  | 2.03  | 0.42 |
| 5  | 11  | -5 | 1.58  | 0.43 |
| -4 | -11 | 5  | 1.60  | 0.42 |
| 4  | -11 | -5 | 0.82  | 0.41 |
| 4  | -11 | -5 | 1.46  | 0.48 |
| -4 | -11 | 5  | 1.46  | 0.49 |
| 4  | 11  | -5 | 1.09  | 0.42 |
| -4 | 11  | 5  | 1.67  | 0.45 |
| -3 | -11 | 5  | 1.07  | 0.43 |
| -3 | -11 | 5  | 0.99  | 0.35 |
| 3  | -11 | -5 | 1.90  | 0.47 |
| 3  | -11 | -5 | 1.78  | 0.45 |
| -3 | 11  | 5  | 1.03  | 0.39 |
| 3  | 11  | -5 | 1.44  | 0.39 |
| -2 | -11 | 5  | 1.34  | 0.47 |
| 2  | -11 | -5 | 0.15  | 0.43 |
| -2 | 11  | 5  | 0.71  | 0.36 |
| 2  | 11  | -5 | 0.00  | 0.35 |
| 2  | 11  | -5 | 0.91  | 0.39 |
| -1 | -11 | 5  | 4.33  | 0.54 |
| 1  | -11 | -5 | 6.10  | 0.67 |
| -1 | 11  | 5  | 3.90  | 0.50 |
| 1  | 11  | -5 | 5.46  | 0.51 |
| 1  | 11  | -5 | 4.96  | 0.55 |
| 0  | -11 | 5  | 1.33  | 0.45 |
| 0  | -11 | -5 | 2.11  | 0.58 |
| 0  | 11  | -5 | 1.82  | 0.39 |
| 0  | 11  | 5  | 1.35  | 0.37 |
| 0  | 11  | -5 | 1.11  | 0.41 |
| -1 | -11 | -5 | -0.91 | 0.45 |
| 1  | -11 | 5  | -0.29 | 0.33 |
| -1 | 11  | -5 | 0.16  | 0.30 |
| 1  | 11  | 5  | -0.22 | 0.30 |
| -1 | 11  | -5 | 0.30  | 0.36 |

|    |     |    |       |      |
|----|-----|----|-------|------|
| 2  | -11 | 5  | 1.61  | 0.44 |
| -2 | -11 | -5 | 0.47  | 0.45 |
| -2 | 11  | -5 | 1.34  | 0.43 |
| 2  | 11  | 5  | 1.39  | 0.43 |
| 2  | 11  | 5  | 1.94  | 0.46 |
| 3  | -11 | 5  | 1.75  | 0.44 |
| -3 | -11 | -5 | 1.56  | 0.57 |
| 3  | 11  | 5  | 2.17  | 0.50 |
| -3 | 11  | -5 | 1.08  | 0.39 |
| 3  | 11  | 5  | 1.47  | 0.40 |
| -4 | -11 | -5 | -0.15 | 0.44 |
| 4  | -11 | 5  | 0.07  | 0.42 |
| -4 | 11  | -5 | 0.15  | 0.35 |
| 4  | 11  | 5  | 0.02  | 0.33 |
| 5  | -11 | 5  | 2.29  | 0.50 |
| -5 | -11 | -5 | 1.26  | 0.63 |
| -5 | 11  | -5 | 2.25  | 0.53 |
| 5  | 11  | 5  | 1.48  | 0.46 |
| -6 | -11 | -5 | 0.00  | 0.50 |
| 6  | -11 | 5  | 0.17  | 0.47 |
| 6  | 11  | 5  | 0.36  | 0.41 |
| -6 | 11  | -5 | 0.10  | 0.46 |
| 7  | -11 | 5  | -0.07 | 0.46 |
| -7 | -11 | -5 | 0.32  | 0.63 |
| -7 | 11  | -5 | -0.33 | 0.46 |
| 7  | 11  | 5  | -0.02 | 0.42 |
| 8  | -11 | 5  | 0.32  | 0.56 |
| 10 | -12 | -5 | 0.31  | 0.58 |
| 9  | -12 | -5 | 0.16  | 0.54 |
| -9 | -12 | 5  | 0.09  | 0.70 |
| 9  | 12  | -5 | 0.37  | 0.53 |
| 8  | -12 | -5 | 0.23  | 0.52 |
| -8 | -12 | 5  | 1.07  | 0.54 |
| -8 | -12 | 5  | 1.17  | 0.46 |
| 8  | 12  | -5 | 0.39  | 0.51 |
| 7  | -12 | -5 | -0.27 | 0.46 |
| -7 | -12 | 5  | -0.59 | 0.38 |
| -7 | -12 | 5  | -0.26 | 0.37 |
| -7 | 12  | 5  | -0.33 | 0.38 |
| 7  | 12  | -5 | -0.19 | 0.47 |
| 6  | -12 | -5 | -0.75 | 0.43 |
| -6 | -12 | 5  | -0.79 | 0.33 |
| -6 | -12 | 5  | 0.21  | 0.46 |
| -6 | 12  | 5  | 0.20  | 0.41 |
| 6  | 12  | -5 | -0.36 | 0.38 |
| 5  | -12 | -5 | 0.29  | 0.39 |

|    |     |    |       |      |
|----|-----|----|-------|------|
| 5  | -12 | -5 | -0.05 | 0.46 |
| -5 | -12 | 5  | 0.33  | 0.37 |
| -5 | -12 | 5  | -0.48 | 0.44 |
| 5  | 12  | -5 | 0.70  | 0.45 |
| -5 | 12  | 5  | 0.22  | 0.36 |
| -4 | -12 | 5  | 0.62  | 0.46 |
| 4  | -12 | -5 | 0.37  | 0.46 |
| -4 | -12 | 5  | 0.57  | 0.39 |
| 4  | -12 | -5 | 1.77  | 0.45 |
| -4 | 12  | 5  | 0.78  | 0.40 |
| 4  | 12  | -5 | 0.36  | 0.39 |
| 3  | -12 | -5 | 0.29  | 0.40 |
| -3 | -12 | 5  | -0.05 | 0.37 |
| -3 | 12  | 5  | 0.17  | 0.37 |
| 3  | 12  | -5 | 0.17  | 0.35 |
| 2  | -12 | -5 | 2.01  | 0.54 |
| -2 | -12 | 5  | 1.57  | 0.51 |
| 2  | 12  | -5 | 1.81  | 0.42 |
| -2 | 12  | 5  | 2.69  | 0.48 |
| 2  | 12  | -5 | 1.22  | 0.40 |
| 1  | -12 | -5 | 0.30  | 0.47 |
| -1 | -12 | 5  | 0.49  | 0.40 |
| 1  | 12  | -5 | -0.23 | 0.35 |
| -1 | 12  | 5  | 0.68  | 0.40 |
| 1  | 12  | -5 | -0.05 | 0.31 |
| 0  | -12 | -5 | -0.27 | 0.49 |
| 0  | -12 | 5  | 0.32  | 0.41 |
| 0  | 12  | -5 | 0.63  | 0.40 |
| 0  | 12  | -5 | 0.85  | 0.37 |
| 0  | 12  | 5  | 0.33  | 0.36 |
| -1 | -12 | -5 | 1.41  | 0.53 |
| 1  | -12 | 5  | 0.95  | 0.46 |
| 1  | 12  | 5  | 0.95  | 0.39 |
| -1 | 12  | -5 | 1.56  | 0.47 |
| -2 | -12 | -5 | 1.25  | 0.62 |
| 2  | -12 | 5  | 1.35  | 0.47 |
| 2  | 12  | 5  | 0.90  | 0.40 |
| -2 | 12  | -5 | 0.88  | 0.44 |
| 3  | -12 | 5  | 0.30  | 0.40 |
| -3 | -12 | -5 | -0.82 | 0.45 |
| 3  | 12  | 5  | 0.47  | 0.37 |
| -3 | 12  | -5 | 0.13  | 0.40 |
| -4 | -12 | -5 | 0.23  | 0.50 |
| 4  | -12 | 5  | 0.28  | 0.40 |
| 4  | 12  | 5  | 0.67  | 0.39 |
| -4 | 12  | -5 | 0.28  | 0.39 |

|    |     |    |       |      |
|----|-----|----|-------|------|
| 5  | -12 | 5  | 0.30  | 0.48 |
| -5 | -12 | -5 | -0.90 | 0.56 |
| 5  | 12  | 5  | 0.18  | 0.43 |
| -5 | 12  | -5 | 0.94  | 0.51 |
| -6 | -12 | -5 | -0.42 | 0.61 |
| 6  | -12 | 5  | 0.55  | 0.51 |
| 6  | 12  | 5  | 0.33  | 0.44 |
| -6 | 12  | -5 | 0.02  | 0.49 |
| 7  | 12  | 5  | 0.68  | 0.47 |
| -8 | -13 | 5  | 1.01  | 0.57 |
| 8  | 13  | -5 | 0.01  | 0.48 |
| -7 | -13 | 5  | 0.45  | 0.44 |
| -7 | -13 | 5  | 0.90  | 0.57 |
| 7  | 13  | -5 | 0.56  | 0.53 |
| -7 | 13  | 5  | 0.13  | 0.44 |
| -6 | -13 | 5  | 0.52  | 0.47 |
| -6 | -13 | 5  | -0.19 | 0.39 |
| -6 | 13  | 5  | 0.30  | 0.40 |
| 6  | 13  | -5 | -0.54 | 0.41 |
| -5 | -13 | 5  | 0.82  | 0.43 |
| 5  | -13 | -5 | 0.18  | 0.40 |
| -5 | -13 | 5  | 0.27  | 0.49 |
| -5 | 13  | 5  | 0.46  | 0.42 |
| 5  | 13  | -5 | 0.42  | 0.43 |
| -4 | -13 | 5  | 1.04  | 0.52 |
| 4  | -13 | -5 | 0.71  | 0.45 |
| 4  | 13  | -5 | 0.48  | 0.48 |
| -4 | 13  | 5  | 0.68  | 0.48 |
| 3  | -13 | -5 | 0.35  | 0.45 |
| -3 | -13 | 5  | 0.58  | 0.44 |
| 3  | 13  | -5 | 1.05  | 0.42 |
| 3  | 13  | -5 | 0.53  | 0.45 |
| -3 | 13  | 5  | 0.36  | 0.41 |
| 2  | -13 | -5 | -0.34 | 0.45 |
| -2 | -13 | 5  | -0.40 | 0.38 |
| 2  | 13  | -5 | -0.26 | 0.40 |
| -2 | 13  | 5  | 0.20  | 0.42 |
| 2  | 13  | -5 | 0.68  | 0.37 |
| 1  | -13 | -5 | -0.16 | 0.42 |
| -1 | -13 | 5  | 0.21  | 0.41 |
| 1  | 13  | -5 | 0.20  | 0.41 |
| 1  | 13  | -5 | 0.39  | 0.41 |
| -1 | 13  | 5  | 0.08  | 0.46 |
| 0  | -13 | -5 | 0.57  | 0.58 |
| 0  | -13 | 5  | 0.93  | 0.43 |
| 0  | 13  | -5 | 1.26  | 0.42 |

|    |     |    |       |      |
|----|-----|----|-------|------|
| 0  | 13  | -5 | 0.79  | 0.43 |
| 0  | 13  | 5  | 1.34  | 0.49 |
| 1  | -13 | 5  | 1.24  | 0.47 |
| -1 | -13 | -5 | 0.31  | 0.57 |
| 1  | 13  | 5  | 1.11  | 0.49 |
| -1 | 13  | -5 | 0.48  | 0.44 |
| 2  | -13 | 5  | 0.34  | 0.42 |
| -2 | -13 | -5 | -0.28 | 0.52 |
| -2 | 13  | -5 | -0.04 | 0.36 |
| 2  | 13  | 5  | 0.16  | 0.43 |
| -3 | -13 | -5 | 0.62  | 0.65 |
| 3  | -13 | 5  | 0.73  | 0.50 |
| 3  | 13  | 5  | 0.66  | 0.42 |
| -3 | 13  | -5 | 0.67  | 0.47 |
| 4  | -13 | 5  | 0.42  | 0.44 |
| -4 | -13 | -5 | -0.55 | 0.61 |
| -4 | 13  | -5 | -0.34 | 0.45 |
| 4  | 13  | 5  | 0.45  | 0.45 |
| 5  | -13 | 5  | -0.03 | 0.42 |
| -5 | -13 | -5 | -0.89 | 0.55 |
| 5  | 13  | 5  | 0.18  | 0.46 |
| -5 | 13  | -5 | -0.02 | 0.47 |
| 6  | 13  | 5  | 0.16  | 0.51 |
| -8 | -14 | 5  | -0.13 | 0.55 |
| -7 | -14 | 5  | 0.77  | 0.55 |
| -6 | -14 | 5  | 0.53  | 0.56 |
| -6 | 14  | 5  | -0.23 | 0.43 |
| 6  | 14  | -5 | -0.53 | 0.43 |
| -5 | -14 | 5  | 1.11  | 0.58 |
| 5  | 14  | -5 | -0.10 | 0.44 |
| -5 | 14  | 5  | 0.20  | 0.46 |
| 4  | -14 | -5 | 0.07  | 0.46 |
| -4 | -14 | 5  | 0.34  | 0.46 |
| 4  | 14  | -5 | 1.09  | 0.54 |
| -4 | 14  | 5  | -0.35 | 0.47 |
| 4  | 14  | -5 | 0.08  | 0.44 |
| 3  | -14 | -5 | 0.99  | 0.52 |
| -3 | -14 | 5  | 0.84  | 0.55 |
| -3 | 14  | 5  | 1.03  | 0.49 |
| 3  | 14  | -5 | 0.08  | 0.47 |
| 3  | 14  | -5 | 0.36  | 0.41 |
| -2 | -14 | 5  | 0.58  | 0.46 |
| 2  | -14 | -5 | 0.28  | 0.49 |
| -2 | 14  | 5  | 0.70  | 0.45 |
| 2  | 14  | -5 | 0.09  | 0.45 |
| 2  | 14  | -5 | 0.14  | 0.42 |

|    |     |    |       |      |
|----|-----|----|-------|------|
| 1  | -14 | -5 | 1.78  | 0.60 |
| -1 | -14 | 5  | 1.28  | 0.56 |
| -1 | 14  | 5  | 0.85  | 0.48 |
| 1  | 14  | -5 | 1.33  | 0.49 |
| 1  | 14  | -5 | 0.94  | 0.48 |
| 0  | -14 | 5  | 0.75  | 0.50 |
| 0  | -14 | -5 | -0.02 | 0.48 |
| 0  | 14  | 5  | -0.44 | 0.47 |
| 0  | 14  | -5 | 0.69  | 0.45 |
| 1  | -14 | 5  | 0.89  | 0.51 |
| -1 | -14 | -5 | -0.96 | 0.47 |
| -1 | 14  | -5 | -0.19 | 0.42 |
| 1  | 14  | 5  | 0.13  | 0.42 |
| -2 | -14 | -5 | 1.06  | 0.57 |
| 2  | -14 | 5  | 0.63  | 0.50 |
| 2  | 14  | 5  | 1.05  | 0.53 |
| -2 | 14  | -5 | -0.18 | 0.44 |
| -3 | -14 | -5 | -0.30 | 0.60 |
| 3  | -14 | 5  | 0.24  | 0.50 |
| 3  | 14  | 5  | 0.64  | 0.51 |
| -3 | 14  | -5 | -0.24 | 0.46 |
| -4 | 14  | -5 | -0.09 | 0.47 |
| 4  | 14  | 5  | 0.18  | 0.49 |
| -6 | 15  | 5  | 0.01  | 0.52 |
| -5 | -15 | 5  | 1.01  | 0.62 |
| -5 | 15  | 5  | 0.20  | 0.50 |
| -4 | -15 | 5  | 0.75  | 0.50 |
| 4  | -15 | -5 | 0.70  | 0.52 |
| -4 | 15  | 5  | 0.33  | 0.52 |
| 4  | 15  | -5 | -0.28 | 0.50 |
| -3 | -15 | 5  | 0.24  | 0.47 |
| 3  | -15 | -5 | -0.33 | 0.48 |
| 3  | 15  | -5 | -0.25 | 0.44 |
| -3 | 15  | 5  | -0.27 | 0.50 |
| -2 | -15 | 5  | 0.88  | 0.57 |
| 2  | -15 | -5 | 0.49  | 0.53 |
| 2  | 15  | -5 | 0.77  | 0.50 |
| 2  | 15  | -5 | 0.56  | 0.46 |
| -2 | 15  | 5  | 0.08  | 0.55 |
| 1  | -15 | -5 | -0.22 | 0.51 |
| -1 | -15 | 5  | 0.91  | 0.56 |
| 1  | 15  | -5 | -0.09 | 0.42 |
| -1 | 15  | 5  | 0.25  | 0.52 |
| 1  | 15  | -5 | 0.15  | 0.47 |
| 0  | -15 | 5  | 0.58  | 0.48 |
| 0  | -15 | -5 | 1.58  | 0.64 |

|     |     |    |       |      |
|-----|-----|----|-------|------|
| 0   | 15  | -5 | 0.42  | 0.47 |
| 0   | 15  | 5  | 0.74  | 0.50 |
| 1   | -15 | 5  | 0.20  | 0.47 |
| -1  | -15 | -5 | 0.11  | 0.61 |
| 1   | 15  | 5  | -0.32 | 0.45 |
| -1  | 15  | -5 | 0.54  | 0.49 |
| -2  | 15  | -5 | -0.20 | 0.46 |
| 3   | -16 | -5 | -0.32 | 0.83 |
| 2   | 16  | -5 | 0.41  | 0.55 |
| 0   | 16  | -5 | -0.14 | 0.49 |
| 14  | 0   | -6 | 0.41  | 0.50 |
| -14 | 0   | 6  | -0.19 | 0.48 |
| -13 | 0   | 6  | 0.35  | 0.41 |
| 13  | 0   | -6 | 0.12  | 0.47 |
| 12  | 0   | -6 | 0.66  | 0.44 |
| -12 | 0   | 6  | 0.14  | 0.42 |
| 11  | 0   | -6 | 2.56  | 0.41 |
| 11  | 0   | -6 | 2.51  | 0.48 |
| -11 | 0   | 6  | 3.09  | 0.51 |
| 10  | 0   | -6 | 0.27  | 0.31 |
| -10 | 0   | 6  | 0.27  | 0.37 |
| 10  | 0   | -6 | -0.49 | 0.36 |
| -9  | 0   | 6  | 0.52  | 0.36 |
| 9   | 0   | -6 | 0.45  | 0.30 |
| 9   | 0   | -6 | 0.16  | 0.37 |
| -8  | 0   | 6  | 7.76  | 0.49 |
| 8   | 0   | -6 | 6.77  | 0.56 |
| -8  | 0   | 6  | 7.48  | 0.59 |
| -8  | 0   | 6  | 7.45  | 0.70 |
| 7   | 0   | -6 | 13.76 | 0.80 |
| -7  | 0   | 6  | 14.83 | 0.71 |
| -7  | 0   | 6  | 15.73 | 0.86 |
| 7   | 0   | -6 | 14.67 | 0.72 |
| -7  | 0   | 6  | 15.31 | 0.61 |
| -6  | 0   | 6  | 0.09  | 0.21 |
| 6   | 0   | -6 | 0.40  | 0.31 |
| -6  | 0   | 6  | -0.19 | 0.32 |
| 6   | 0   | -6 | 0.83  | 0.35 |
| -6  | 0   | 6  | 0.14  | 0.25 |
| -5  | 0   | 6  | 92.22 | 2.35 |
| 5   | 0   | -6 | 90.68 | 2.34 |
| 5   | 0   | -6 | 88.53 | 2.12 |
| -5  | 0   | 6  | 89.56 | 1.94 |
| -5  | 0   | 6  | 88.77 | 2.06 |
| 4   | 0   | -6 | 12.32 | 0.67 |
| -4  | 0   | 6  | 11.96 | 0.62 |



4 0 -6 13.23 0.59  
-4 0 6 12.09 0.51  
-4 0 6 11.37 0.46  
3 0 -6 5.80 0.42  
3 0 -6 4.78 0.43  
-3 0 6 5.38 0.27  
-3 0 6 5.28 0.34  
-3 0 6 4.53 0.42  
-3 0 6 5.38 0.34  
-2 0 6 142.07 2.85  
2 0 -6 144.93 3.38  
-2 0 6 140.94 2.99  
-2 0 6 143.60 3.08  
1 0 -6 6.65 0.46  
-1 0 6 7.07 0.35  
-1 0 6 6.92 0.36  
-1 0 6 7.46 0.42  
-1 0 6 6.44 0.31  
1 0 -6 6.80 0.48  
0 0 -6 5.87 0.46  
0 0 -6 5.85 0.33  
0 0 6 6.60 0.41  
0 0 6 6.23 0.43  
0 0 6 6.14 0.29  
-1 0 -6 13.34 0.49  
-1 0 -6 13.53 0.67  
1 0 6 12.33 0.55  
1 0 6 13.31 0.61  
1 0 6 13.67 0.68  
1 0 6 13.94 0.43  
2 0 6 21.45 0.55  
2 0 6 20.16 0.77  
-2 0 -6 22.31 0.91  
-2 0 -6 20.70 0.65  
2 0 6 19.27 0.87  
3 0 6 38.60 0.85  
-3 0 -6 38.68 1.05  
3 0 6 39.39 1.20  
3 0 6 39.41 1.33  
3 0 6 38.22 1.19  
-3 0 -6 38.33 1.14  
-3 0 -6 37.75 1.33  
4 0 6 3.29 0.53  
-4 0 -6 2.50 0.32  
4 0 6 2.12 0.43  
-4 0 -6 2.22 0.36

5 0 6 1.30 0.40  
5 0 6 0.21 0.36  
-5 0 -6 0.93 0.27  
-5 0 -6 0.63 0.29  
-6 0 -6 10.47 0.66  
-6 0 -6 9.97 0.58  
6 0 6 6.91 0.62  
6 0 6 8.37 0.69  
-7 0 -6 1.36 0.34  
7 0 6 1.13 0.42  
-7 0 -6 0.56 0.35  
8 0 6 -0.18 0.38  
-8 0 -6 -0.71 0.27  
-8 0 -6 0.17 0.34  
-9 0 -6 0.93 0.41  
9 0 6 0.94 0.45  
-9 0 -6 1.12 0.47  
-10 0 -6 0.72 0.49  
10 0 6 0.29 0.47  
-11 0 -6 0.73 0.52  
-14 -1 6 -0.10 0.43  
14 -1 -6 0.35 0.51  
-14 1 6 0.14 0.43  
14 1 -6 0.89 0.52  
-13 -1 6 0.26 0.40  
13 -1 -6 0.92 0.48  
13 1 -6 1.40 0.52  
-13 1 6 0.97 0.49  
12 -1 -6 0.33 0.44  
-12 -1 6 0.41 0.37  
12 1 -6 -0.07 0.34  
-12 1 6 -0.09 0.40  
12 1 -6 -0.05 0.42  
-11 -1 6 0.98 0.44  
11 -1 -6 1.22 0.45  
11 -1 -6 1.12 0.36  
11 1 -6 1.02 0.42  
-11 1 6 1.01 0.36  
11 1 -6 0.94 0.36  
10 -1 -6 6.96 0.55  
10 -1 -6 8.23 0.68  
-10 -1 6 7.01 0.61  
-10 1 6 8.52 0.66  
10 1 -6 9.23 0.67  
10 1 -6 7.52 0.56  
-9 -1 6 6.97 0.59

|    |    |    |       |      |
|----|----|----|-------|------|
| 9  | -1 | -6 | 6.80  | 0.62 |
| -9 | 1  | 6  | 7.27  | 0.52 |
| -9 | 1  | 6  | 6.07  | 0.56 |
| 9  | 1  | -6 | 6.77  | 0.58 |
| 9  | 1  | -6 | 6.04  | 0.51 |
| -8 | -1 | 6  | 18.36 | 0.80 |
| -8 | -1 | 6  | 20.41 | 1.02 |
| 8  | -1 | -6 | 18.62 | 0.81 |
| 8  | 1  | -6 | 17.97 | 0.80 |
| 8  | 1  | -6 | 20.04 | 0.74 |
| 8  | 1  | -6 | 19.12 | 0.92 |
| -8 | 1  | 6  | 17.50 | 0.77 |
| -8 | 1  | 6  | 18.90 | 0.71 |
| 7  | -1 | -6 | 14.94 | 0.85 |
| 7  | -1 | -6 | 12.62 | 0.73 |
| -7 | -1 | 6  | 14.49 | 0.68 |
| -7 | -1 | 6  | 14.15 | 0.84 |
| 7  | 1  | -6 | 14.14 | 0.77 |
| 7  | 1  | -6 | 12.62 | 0.66 |
| -7 | 1  | 6  | 13.88 | 0.68 |
| -7 | 1  | 6  | 15.10 | 0.88 |
| -7 | 1  | 6  | 14.46 | 0.58 |
| -6 | -1 | 6  | 36.08 | 0.77 |
| -6 | -1 | 6  | 36.01 | 1.10 |
| 6  | -1 | -6 | 39.41 | 1.32 |
| -6 | -1 | 6  | 35.40 | 1.25 |
| -6 | -1 | 6  | 35.38 | 0.98 |
| 6  | -1 | -6 | 35.97 | 1.14 |
| 6  | 1  | -6 | 35.92 | 1.20 |
| -6 | 1  | 6  | 36.96 | 0.98 |
| 6  | 1  | -6 | 36.50 | 1.09 |
| -6 | 1  | 6  | 36.00 | 1.04 |
| -6 | 1  | 6  | 36.45 | 1.30 |
| -5 | -1 | 6  | 22.63 | 0.53 |
| -5 | -1 | 6  | 22.66 | 0.69 |
| 5  | -1 | -6 | 21.26 | 0.82 |
| -5 | -1 | 6  | 23.93 | 0.90 |
| -5 | -1 | 6  | 22.26 | 0.75 |
| 5  | -1 | -6 | 20.87 | 0.93 |
| -5 | 1  | 6  | 21.46 | 0.92 |
| 5  | 1  | -6 | 21.19 | 0.87 |
| -5 | 1  | 6  | 21.77 | 0.68 |
| -5 | 1  | 6  | 21.46 | 0.71 |
| 5  | 1  | -6 | 22.88 | 0.77 |
| 4  | -1 | -6 | 2.39  | 0.38 |
| -4 | -1 | 6  | 1.91  | 0.31 |

|    |    |    |       |      |
|----|----|----|-------|------|
| -4 | -1 | 6  | 2.50  | 0.19 |
| -4 | -1 | 6  | 2.27  | 0.31 |
| 4  | -1 | -6 | 2.41  | 0.16 |
| -4 | -1 | 6  | 2.06  | 0.25 |
| 4  | -1 | -6 | 2.10  | 0.34 |
| -4 | 1  | 6  | 2.55  | 0.38 |
| -4 | 1  | 6  | 2.38  | 0.28 |
| -4 | 1  | 6  | 2.24  | 0.26 |
| 4  | 1  | -6 | 2.91  | 0.33 |
| 4  | 1  | -6 | 2.63  | 0.35 |
| 3  | -1 | -6 | 32.75 | 1.08 |
| 3  | -1 | -6 | 30.98 | 0.76 |
| -3 | -1 | 6  | 31.48 | 0.99 |
| -3 | -1 | 6  | 29.98 | 0.86 |
| -3 | -1 | 6  | 31.52 | 0.82 |
| -3 | -1 | 6  | 32.64 | 0.79 |
| 3  | -1 | -6 | 32.69 | 0.96 |
| 3  | 1  | -6 | 30.90 | 0.89 |
| -3 | 1  | 6  | 31.33 | 0.82 |
| 3  | 1  | -6 | 32.88 | 1.02 |
| -3 | 1  | 6  | 32.38 | 1.06 |
| 2  | -1 | -6 | 3.18  | 0.24 |
| -2 | -1 | 6  | 3.34  | 0.31 |
| -2 | -1 | 6  | 2.95  | 0.25 |
| 2  | -1 | -6 | 1.69  | 0.30 |
| -2 | 1  | 6  | 2.78  | 0.31 |
| -2 | 1  | 6  | 2.90  | 0.28 |
| 2  | 1  | -6 | 2.77  | 0.31 |
| 2  | 1  | -6 | 2.97  | 0.33 |
| -2 | 1  | 6  | 2.78  | 0.25 |
| -2 | 1  | 6  | 3.15  | 0.36 |
| -2 | 1  | 6  | 2.90  | 0.25 |
| -1 | -1 | 6  | 24.89 | 0.74 |
| 1  | -1 | -6 | 27.05 | 0.91 |
| -1 | -1 | 6  | 25.82 | 0.73 |
| 1  | -1 | -6 | 24.08 | 0.90 |
| 1  | -1 | -6 | 24.97 | 0.71 |
| -1 | -1 | 6  | 25.48 | 0.75 |
| -1 | 1  | 6  | 25.99 | 0.68 |
| -1 | 1  | 6  | 25.97 | 0.75 |
| -1 | 1  | 6  | 23.99 | 0.78 |
| 1  | 1  | -6 | 25.20 | 0.85 |
| -1 | 1  | 6  | 26.06 | 0.69 |
| 1  | 1  | -6 | 25.72 | 0.86 |
| 0  | -1 | -6 | 60.72 | 1.69 |
| 0  | -1 | 6  | 62.10 | 1.30 |

|    |    |    |       |      |
|----|----|----|-------|------|
| 0  | -1 | 6  | 59.57 | 1.48 |
| 0  | -1 | 6  | 61.84 | 1.47 |
| 0  | -1 | 6  | 60.09 | 1.64 |
| 0  | -1 | -6 | 61.39 | 1.69 |
| 0  | -1 | -6 | 62.16 | 1.48 |
| 0  | -1 | -6 | 64.33 | 1.38 |
| 0  | 1  | -6 | 61.25 | 1.63 |
| 0  | 1  | 6  | 61.05 | 1.52 |
| 0  | 1  | 6  | 62.11 | 1.47 |
| 1  | -1 | 6  | 34.91 | 1.16 |
| -1 | -1 | -6 | 37.68 | 0.91 |
| -1 | -1 | -6 | 36.78 | 1.21 |
| 1  | -1 | 6  | 37.36 | 0.84 |
| -1 | -1 | -6 | 36.48 | 1.03 |
| 1  | -1 | 6  | 37.22 | 1.04 |
| 1  | -1 | 6  | 36.97 | 1.06 |
| -1 | 1  | -6 | 39.35 | 1.01 |
| 1  | 1  | 6  | 37.85 | 1.08 |
| 1  | 1  | 6  | 37.78 | 1.22 |
| -1 | 1  | -6 | 37.29 | 1.17 |
| 1  | 1  | 6  | 36.98 | 0.88 |
| 1  | 1  | 6  | 38.01 | 1.08 |
| -2 | -1 | -6 | 78.86 | 1.71 |
| -2 | -1 | -6 | 78.02 | 2.10 |
| 2  | -1 | 6  | 76.75 | 1.88 |
| 2  | -1 | 6  | 77.86 | 2.08 |
| 2  | -1 | 6  | 76.30 | 1.53 |
| -2 | -1 | -6 | 75.72 | 1.85 |
| 2  | -1 | 6  | 74.53 | 1.85 |
| -2 | 1  | -6 | 75.96 | 2.06 |
| 2  | 1  | 6  | 76.94 | 1.59 |
| 2  | 1  | 6  | 78.91 | 2.11 |
| 2  | 1  | 6  | 78.62 | 1.87 |
| 2  | 1  | 6  | 74.66 | 1.90 |
| -2 | 1  | -6 | 72.10 | 1.77 |
| 3  | -1 | 6  | 10.64 | 0.63 |
| -3 | -1 | -6 | 10.02 | 0.73 |
| -3 | -1 | -6 | 9.86  | 0.54 |
| 3  | -1 | 6  | 9.60  | 0.68 |
| 3  | -1 | 6  | 10.53 | 0.62 |
| -3 | -1 | -6 | 9.91  | 0.45 |
| -3 | 1  | -6 | 9.97  | 0.50 |
| 3  | 1  | 6  | 10.15 | 0.37 |
| 3  | 1  | 6  | 10.35 | 0.61 |
| 3  | 1  | 6  | 9.48  | 0.69 |
| 3  | 1  | 6  | 9.81  | 0.67 |

-3 1 -6 10.17 0.71  
-4 -1 -6 5.70 0.41  
-4 -1 -6 5.54 0.51  
4 -1 6 4.77 0.48  
4 -1 6 5.16 0.52  
4 1 6 5.30 0.55  
-4 1 -6 6.33 0.47  
4 1 6 4.98 0.54  
-5 -1 -6 9.56 0.51  
-5 -1 -6 7.95 0.59  
5 -1 6 8.70 0.64  
5 1 6 7.35 0.63  
-5 1 -6 7.80 0.52  
-5 1 -6 8.68 0.57  
6 -1 6 0.94 0.39  
-6 -1 -6 0.02 0.25  
6 -1 6 1.02 0.41  
-6 -1 -6 0.36 0.30  
6 1 6 0.63 0.36  
-6 1 -6 0.77 0.34  
-6 1 -6 0.63 0.30  
7 -1 6 -0.25 0.43  
-7 -1 -6 -0.20 0.26  
-7 -1 -6 0.38 0.33  
7 -1 6 0.39 0.38  
-7 1 -6 0.88 0.34  
7 1 6 0.48 0.38  
-7 1 -6 0.76 0.34  
8 -1 6 1.99 0.48  
-8 -1 -6 2.13 0.44  
8 -1 6 2.07 0.53  
-8 -1 -6 2.17 0.56  
8 1 6 1.21 0.42  
-8 1 -6 1.88 0.46  
-8 1 -6 1.98 0.42  
-9 -1 -6 1.87 0.51  
9 -1 6 1.98 0.52  
-9 1 -6 2.11 0.45  
-9 1 -6 1.65 0.48  
9 1 6 1.40 0.49  
10 -1 6 0.18 0.45  
-10 -1 -6 0.73 0.49  
-10 1 -6 -0.38 0.39  
-10 1 -6 -0.05 0.42  
10 1 6 0.42 0.48  
-11 -1 -6 0.30 0.52

-11 1 -6 -0.40 0.47  
-14 -2 6 -0.12 0.43  
14 -2 -6 0.15 0.50  
14 2 -6 0.55 0.52  
-14 2 6 -0.03 0.47  
-13 -2 6 0.71 0.50  
13 -2 -6 0.11 0.50  
-13 2 6 0.17 0.45  
13 2 -6 0.52 0.46  
12 -2 -6 0.55 0.45  
-12 -2 6 -0.07 0.42  
-12 2 6 0.77 0.39  
12 2 -6 0.36 0.40  
12 2 -6 0.15 0.38  
11 -2 -6 1.30 0.49  
-11 -2 6 1.56 0.46  
-11 2 6 2.10 0.42  
11 2 -6 1.83 0.45  
11 2 -6 1.48 0.39  
-10 -2 6 4.94 0.57  
10 -2 -6 4.61 0.59  
-10 2 6 4.75 0.51  
10 2 -6 5.14 0.54  
-10 2 6 5.67 0.47  
10 2 -6 4.37 0.47  
9 -2 -6 1.99 0.46  
-9 -2 6 2.17 0.44  
-9 2 6 2.21 0.42  
-9 2 6 1.61 0.31  
9 2 -6 1.70 0.40  
9 2 -6 1.78 0.35  
8 -2 -6 2.60 0.44  
-8 -2 6 2.80 0.43  
-8 -2 6 1.72 0.44  
-8 2 6 3.36 0.43  
-8 2 6 3.65 0.39  
8 2 -6 4.03 0.44  
8 2 -6 2.99 0.43  
8 2 -6 3.10 0.46  
-7 -2 6 20.13 0.93  
7 -2 -6 18.81 0.87  
-7 -2 6 20.28 0.80  
7 2 -6 19.98 0.74  
7 2 -6 18.70 0.74  
-7 2 6 18.59 1.00  
-7 2 6 19.81 0.78

|    |    |    |       |      |
|----|----|----|-------|------|
| 7  | 2  | -6 | 18.33 | 0.85 |
| -7 | 2  | 6  | 19.40 | 0.68 |
| -6 | -2 | 6  | 31.38 | 0.99 |
| -6 | -2 | 6  | 28.52 | 0.70 |
| 6  | -2 | -6 | 29.54 | 1.17 |
| 6  | -2 | -6 | 28.44 | 1.03 |
| -6 | -2 | 6  | 28.53 | 1.06 |
| -6 | 2  | 6  | 30.81 | 0.92 |
| 6  | 2  | -6 | 30.65 | 1.04 |
| 6  | 2  | -6 | 29.84 | 0.92 |
| -6 | 2  | 6  | 27.82 | 1.15 |
| 6  | 2  | -6 | 28.76 | 0.90 |
| -6 | 2  | 6  | 27.80 | 0.84 |
| -5 | -2 | 6  | 9.22  | 0.54 |
| 5  | -2 | -6 | 7.76  | 0.62 |
| -5 | -2 | 6  | 8.64  | 0.34 |
| -5 | -2 | 6  | 8.95  | 0.57 |
| 5  | -2 | -6 | 9.07  | 0.59 |
| -5 | 2  | 6  | 9.65  | 0.45 |
| 5  | 2  | -6 | 8.25  | 0.49 |
| -5 | 2  | 6  | 8.84  | 0.66 |
| 5  | 2  | -6 | 9.02  | 0.47 |
| -5 | 2  | 6  | 9.15  | 0.47 |
| 5  | 2  | -6 | 9.25  | 0.57 |
| -4 | -2 | 6  | 8.81  | 0.51 |
| 4  | -2 | -6 | 8.46  | 0.54 |
| -4 | -2 | 6  | 8.61  | 0.34 |
| -4 | -2 | 6  | 7.56  | 0.45 |
| 4  | -2 | -6 | 9.27  | 0.64 |
| 4  | -2 | -6 | 8.86  | 0.30 |
| 4  | 2  | -6 | 8.69  | 0.52 |
| 4  | 2  | -6 | 9.21  | 0.46 |
| -4 | 2  | 6  | 9.13  | 0.42 |
| -4 | 2  | 6  | 8.32  | 0.59 |
| -3 | -2 | 6  | 35.63 | 0.89 |
| -3 | -2 | 6  | 32.73 | 0.99 |
| -3 | -2 | 6  | 32.83 | 0.85 |
| 3  | -2 | -6 | 34.72 | 1.17 |
| 3  | -2 | -6 | 34.68 | 0.83 |
| -3 | -2 | 6  | 35.17 | 0.97 |
| 3  | -2 | -6 | 34.95 | 1.03 |
| 3  | 2  | -6 | 31.25 | 1.01 |
| -3 | 2  | 6  | 33.73 | 1.13 |
| 3  | 2  | -6 | 34.06 | 0.92 |
| -3 | 2  | 6  | 34.76 | 0.89 |
| -3 | 2  | 6  | 34.85 | 0.86 |



-2 -2 6 34.77 0.86  
2 -2 -6 33.89 1.15  
2 -2 -6 34.99 0.88  
-2 -2 6 34.17 0.90  
-2 -2 6 37.27 0.98  
2 2 -6 34.54 1.04  
-2 2 6 35.72 1.13  
-2 2 6 35.68 0.84  
2 2 -6 34.88 1.01  
-2 2 6 34.18 0.88  
-2 2 6 33.89 0.98  
-1 -2 6 0.42 0.23  
-1 -2 6 0.40 0.19  
1 -2 -6 0.11 0.22  
-1 -2 6 0.70 0.25  
1 -2 -6 0.52 0.19  
1 -2 -6 0.44 0.24  
-1 2 6 0.69 0.15  
1 2 -6 0.64 0.22  
-1 2 6 0.72 0.20  
-1 2 6 0.73 0.24  
1 2 -6 0.23 0.22  
0 -2 6 5.24 0.40  
0 -2 -6 4.44 0.34  
0 -2 -6 4.56 0.23  
0 -2 -6 4.63 0.43  
0 -2 -6 4.45 0.44  
0 -2 6 4.12 0.25  
0 2 -6 4.71 0.38  
0 2 6 4.59 0.41  
0 2 6 4.59 0.31  
1 -2 6 6.22 0.27  
-1 -2 -6 6.20 0.27  
1 -2 6 6.37 0.45  
-1 -2 -6 7.18 0.57  
-1 -2 -6 5.96 0.43  
1 -2 6 6.28 0.50  
1 -2 6 7.38 0.48  
1 2 6 6.53 0.40  
1 2 6 6.48 0.46  
-1 2 -6 6.27 0.38  
-1 2 -6 5.69 0.45  
1 2 6 6.35 0.51  
2 -2 6 1.50 0.35  
2 -2 6 0.97 0.31  
-2 -2 -6 1.45 0.32

-2 -2 -6 1.19 0.18  
-2 -2 -6 1.69 0.38  
2 -2 6 0.60 0.30  
-2 2 -6 1.49 0.26  
-2 2 -6 1.37 0.35  
2 2 6 1.47 0.22  
2 2 6 1.27 0.37  
2 2 6 0.50 0.33  
-2 2 -6 1.37 0.14  
3 -2 6 7.92 0.64  
-3 -2 -6 9.24 0.55  
3 -2 6 9.26 0.60  
-3 -2 -6 9.12 0.71  
3 -2 6 9.38 0.56  
-3 -2 -6 9.63 0.41  
-3 2 -6 9.27 0.66  
3 2 6 9.32 0.64  
-3 2 -6 9.86 0.53  
3 2 6 9.60 0.40  
4 -2 6 7.84 0.61  
-4 -2 -6 7.28 0.53  
-4 -2 -6 8.30 0.43  
4 -2 6 6.59 0.54  
4 2 6 7.66 0.63  
-4 2 -6 8.17 0.54  
4 2 6 8.31 0.37  
-5 -2 -6 0.05 0.22  
5 -2 6 0.78 0.36  
5 -2 6 0.21 0.35  
-5 -2 -6 0.78 0.29  
-5 2 -6 0.78 0.32  
5 2 6 0.21 0.37  
-6 -2 -6 0.87 0.28  
6 -2 6 1.56 0.42  
-6 -2 -6 1.23 0.38  
6 2 6 1.64 0.44  
-6 2 -6 1.59 0.37  
7 -2 6 0.67 0.40  
-7 -2 -6 0.55 0.36  
7 -2 6 0.24 0.44  
7 2 6 0.29 0.39  
-7 2 -6 1.32 0.36  
-7 2 -6 0.72 0.36  
8 -2 6 0.54 0.48  
8 -2 6 0.29 0.40  
-8 -2 -6 -0.45 0.29

-8 2 -6 0.35 0.33  
8 2 6 0.69 0.42  
-8 2 -6 -0.19 0.32  
9 -2 6 1.57 0.54  
-9 -2 -6 0.43 0.40  
9 -2 6 0.93 0.48  
9 2 6 1.73 0.50  
-9 2 -6 0.86 0.47  
-9 2 -6 0.81 0.43  
10 -2 6 1.21 0.51  
-10 -2 -6 1.46 0.54  
-10 2 -6 1.22 0.48  
-10 2 -6 0.88 0.49  
10 2 6 0.73 0.50  
-11 -2 -6 -0.31 0.51  
-11 2 -6 0.06 0.46  
-11 2 -6 -0.56 0.50  
14 -3 -6 0.29 0.50  
-14 -3 6 0.11 0.51  
14 3 -6 0.71 0.70  
-14 3 6 -0.26 0.40  
13 -3 -6 0.50 0.51  
-13 -3 6 0.04 0.47  
13 3 -6 1.31 0.50  
-13 3 6 0.59 0.48  
12 -3 -6 0.45 0.46  
-12 -3 6 0.20 0.39  
12 3 -6 0.08 0.33  
-12 3 6 0.52 0.37  
12 3 -6 0.14 0.41  
-11 -3 6 0.78 0.43  
11 -3 -6 0.43 0.45  
-11 3 6 0.65 0.32  
-11 3 6 0.86 0.40  
11 3 -6 0.68 0.34  
11 3 -6 1.66 0.43  
10 -3 -6 0.67 0.43  
-10 -3 6 2.16 0.47  
-10 3 6 1.43 0.36  
10 3 -6 1.50 0.40  
10 3 -6 1.66 0.39  
-10 3 6 1.56 0.34  
-9 -3 6 -0.05 0.36  
-9 -3 6 -0.33 0.34  
9 -3 -6 0.21 0.39  
-9 3 6 0.46 0.28

|    |    |    |       |      |
|----|----|----|-------|------|
| 9  | 3  | -6 | 0.53  | 0.33 |
| -9 | 3  | 6  | 0.26  | 0.28 |
| 9  | 3  | -6 | 0.42  | 0.32 |
| 8  | -3 | -6 | 5.22  | 0.57 |
| -8 | -3 | 6  | 5.04  | 0.57 |
| -8 | -3 | 6  | 5.67  | 0.56 |
| -8 | 3  | 6  | 6.05  | 0.47 |
| 8  | 3  | -6 | 5.83  | 0.48 |
| 8  | 3  | -6 | 4.79  | 0.45 |
| 8  | 3  | -6 | 4.96  | 0.50 |
| -8 | 3  | 6  | 3.87  | 0.42 |
| -7 | -3 | 6  | 27.30 | 0.98 |
| 7  | -3 | -6 | 25.55 | 1.03 |
| -7 | -3 | 6  | 27.01 | 0.90 |
| -7 | -3 | 6  | 26.23 | 1.03 |
| 7  | 3  | -6 | 25.17 | 0.85 |
| -7 | 3  | 6  | 26.34 | 0.90 |
| 7  | 3  | -6 | 26.88 | 0.97 |
| -7 | 3  | 6  | 24.74 | 0.82 |
| 7  | 3  | -6 | 26.24 | 0.86 |
| -6 | -3 | 6  | 2.93  | 0.26 |
| -6 | -3 | 6  | 2.21  | 0.36 |
| 6  | -3 | -6 | 2.40  | 0.49 |
| -6 | -3 | 6  | 2.74  | 0.39 |
| 6  | -3 | -6 | 2.98  | 0.46 |
| 6  | 3  | -6 | 3.02  | 0.39 |
| -6 | 3  | 6  | 2.60  | 0.47 |
| 6  | 3  | -6 | 1.82  | 0.32 |
| -6 | 3  | 6  | 2.52  | 0.31 |
| -6 | 3  | 6  | 1.85  | 0.30 |
| 6  | 3  | -6 | 3.27  | 0.35 |
| 5  | -3 | -6 | 19.58 | 0.80 |
| 5  | -3 | -6 | 20.21 | 0.93 |
| -5 | -3 | 6  | 19.11 | 0.73 |
| -5 | -3 | 6  | 19.72 | 0.59 |
| -5 | -3 | 6  | 18.78 | 0.75 |
| 5  | -3 | -6 | 19.86 | 0.51 |
| -5 | 3  | 6  | 19.32 | 0.94 |
| -5 | 3  | 6  | 18.47 | 0.82 |
| 5  | 3  | -6 | 19.65 | 0.65 |
| 5  | 3  | -6 | 19.73 | 0.75 |
| -5 | 3  | 6  | 18.89 | 0.68 |
| 5  | 3  | -6 | 19.04 | 0.68 |
| -4 | -3 | 6  | 40.36 | 1.12 |
| 4  | -3 | -6 | 39.55 | 1.19 |
| 4  | -3 | -6 | 38.89 | 0.95 |

|    |    |    |       |      |
|----|----|----|-------|------|
| 4  | -3 | -6 | 40.46 | 1.36 |
| -4 | -3 | 6  | 39.37 | 0.99 |
| -4 | -3 | 6  | 40.04 | 1.12 |
| -4 | 3  | 6  | 40.64 | 1.02 |
| 4  | 3  | -6 | 38.67 | 1.13 |
| -4 | 3  | 6  | 40.01 | 1.33 |
| -4 | 3  | 6  | 43.26 | 1.06 |
| 4  | 3  | -6 | 39.90 | 1.05 |
| 4  | 3  | -6 | 39.99 | 1.03 |
| -3 | -3 | 6  | 5.55  | 0.35 |
| 3  | -3 | -6 | 5.05  | 0.51 |
| 3  | -3 | -6 | 5.50  | 0.30 |
| -3 | -3 | 6  | 4.24  | 0.37 |
| 3  | -3 | -6 | 5.71  | 0.48 |
| -3 | 3  | 6  | 4.76  | 0.35 |
| 3  | 3  | -6 | 5.04  | 0.35 |
| 3  | 3  | -6 | 4.73  | 0.38 |
| 3  | 3  | -6 | 4.70  | 0.34 |
| -3 | 3  | 6  | 4.98  | 0.49 |
| -3 | 3  | 6  | 5.24  | 0.30 |
| -2 | -3 | 6  | 43.13 | 1.07 |
| 2  | -3 | -6 | 41.84 | 1.34 |
| -2 | -3 | 6  | 38.16 | 1.11 |
| -2 | -3 | 6  | 42.68 | 1.03 |
| 2  | -3 | -6 | 41.57 | 1.04 |
| 2  | 3  | -6 | 44.17 | 1.14 |
| 2  | 3  | -6 | 41.02 | 1.01 |
| 2  | 3  | -6 | 40.48 | 1.14 |
| -2 | 3  | 6  | 41.67 | 1.15 |
| -2 | 3  | 6  | 42.32 | 1.31 |
| -2 | 3  | 6  | 42.19 | 0.95 |
| -2 | 3  | 6  | 42.14 | 1.03 |
| 1  | -3 | -6 | 17.39 | 0.76 |
| -1 | -3 | 6  | 17.24 | 0.57 |
| -1 | -3 | 6  | 17.53 | 0.62 |
| -1 | -3 | 6  | 17.71 | 0.65 |
| 1  | -3 | -6 | 18.24 | 0.60 |
| 1  | -3 | -6 | 17.92 | 0.79 |
| 1  | 3  | -6 | 16.71 | 0.64 |
| -1 | 3  | 6  | 17.46 | 0.70 |
| -1 | 3  | 6  | 18.07 | 0.58 |
| -1 | 3  | 6  | 18.06 | 0.45 |
| 1  | 3  | -6 | 17.76 | 0.65 |
| 1  | 3  | -6 | 17.03 | 0.54 |
| 0  | -3 | 6  | 37.11 | 1.00 |
| 0  | -3 | 6  | 36.84 | 1.05 |

|    |    |    |       |      |
|----|----|----|-------|------|
| 0  | -3 | -6 | 39.97 | 1.26 |
| 0  | -3 | 6  | 37.27 | 1.11 |
| 0  | -3 | -6 | 38.38 | 0.81 |
| 0  | -3 | -6 | 37.81 | 1.03 |
| 0  | -3 | -6 | 37.92 | 1.24 |
| 0  | 3  | -6 | 35.34 | 1.04 |
| 0  | 3  | 6  | 37.69 | 1.08 |
| 0  | 3  | -6 | 37.31 | 0.88 |
| 0  | 3  | -6 | 37.82 | 1.10 |
| 0  | 3  | 6  | 38.41 | 0.96 |
| -1 | -3 | -6 | 4.35  | 0.20 |
| -1 | -3 | -6 | 4.77  | 0.49 |
| -1 | -3 | -6 | 3.85  | 0.43 |
| -1 | -3 | -6 | 4.55  | 0.38 |
| 1  | -3 | 6  | 3.84  | 0.39 |
| 1  | 3  | 6  | 4.74  | 0.43 |
| 1  | 3  | 6  | 4.45  | 0.31 |
| -1 | 3  | -6 | 4.37  | 0.41 |
| -1 | 3  | -6 | 3.98  | 0.36 |
| -1 | 3  | -6 | 4.35  | 0.25 |
| -2 | -3 | -6 | 22.83 | 0.80 |
| -2 | -3 | -6 | 21.49 | 0.54 |
| 2  | -3 | 6  | 19.60 | 0.87 |
| 2  | -3 | 6  | 20.76 | 0.77 |
| -2 | -3 | -6 | 20.29 | 0.93 |
| 2  | -3 | 6  | 20.31 | 0.77 |
| -2 | 3  | -6 | 19.57 | 0.50 |
| -2 | 3  | -6 | 22.34 | 0.79 |
| -2 | 3  | -6 | 19.13 | 0.84 |
| 2  | 3  | 6  | 20.45 | 0.63 |
| 2  | 3  | 6  | 20.41 | 0.83 |
| 2  | 3  | 6  | 20.27 | 0.94 |
| -3 | -3 | -6 | 37.06 | 1.67 |
| 3  | -3 | 6  | 38.25 | 1.16 |
| 3  | -3 | 6  | 39.39 | 1.20 |
| -3 | -3 | -6 | 36.93 | 1.16 |
| 3  | -3 | 6  | 37.09 | 1.29 |
| -3 | -3 | -6 | 39.23 | 0.93 |
| 3  | 3  | 6  | 37.47 | 0.96 |
| -3 | 3  | -6 | 38.69 | 1.29 |
| -3 | 3  | -6 | 40.35 | 1.16 |
| 3  | 3  | 6  | 40.36 | 1.24 |
| -4 | -3 | -6 | 5.13  | 0.50 |
| 4  | -3 | 6  | 6.22  | 0.54 |
| 4  | -3 | 6  | 6.16  | 0.55 |
| -4 | -3 | -6 | 5.94  | 0.35 |

|     |    |    |       |      |
|-----|----|----|-------|------|
| 4   | 3  | 6  | 5.68  | 0.58 |
| 4   | 3  | 6  | 6.12  | 0.38 |
| -4  | 3  | -6 | 5.30  | 0.47 |
| 5   | -3 | 6  | 6.41  | 0.57 |
| -5  | -3 | -6 | 4.86  | 0.51 |
| 5   | -3 | 6  | 5.02  | 0.53 |
| -5  | 3  | -6 | 4.79  | 0.50 |
| 5   | 3  | 6  | 4.23  | 0.50 |
| 6   | -3 | 6  | 2.49  | 0.45 |
| -6  | -3 | -6 | 3.17  | 0.44 |
| 6   | -3 | 6  | 2.54  | 0.46 |
| 6   | 3  | 6  | 2.86  | 0.49 |
| -6  | 3  | -6 | 2.98  | 0.44 |
| -7  | -3 | -6 | 1.09  | 0.41 |
| 7   | -3 | 6  | 0.53  | 0.40 |
| 7   | -3 | 6  | 0.28  | 0.39 |
| 7   | 3  | 6  | 0.91  | 0.42 |
| -7  | 3  | -6 | 0.99  | 0.38 |
| -8  | -3 | -6 | 0.76  | 0.39 |
| 8   | -3 | 6  | 1.39  | 0.54 |
| 8   | -3 | 6  | 1.17  | 0.46 |
| 8   | 3  | 6  | 0.91  | 0.42 |
| -8  | 3  | -6 | 1.44  | 0.40 |
| -8  | 3  | -6 | 0.99  | 0.40 |
| 9   | -3 | 6  | 0.29  | 0.45 |
| 9   | -3 | 6  | 0.43  | 0.54 |
| -9  | -3 | -6 | 0.36  | 0.47 |
| -9  | 3  | -6 | 0.06  | 0.42 |
| -9  | 3  | -6 | 0.46  | 0.43 |
| 9   | 3  | 6  | 0.51  | 0.47 |
| 10  | -3 | 6  | 0.71  | 0.49 |
| -10 | -3 | -6 | 0.11  | 0.48 |
| 10  | -3 | 6  | 0.13  | 0.60 |
| -10 | 3  | -6 | 0.45  | 0.49 |
| 10  | 3  | 6  | -0.39 | 0.46 |
| -10 | 3  | -6 | -0.98 | 0.39 |
| -11 | 3  | -6 | 0.20  | 0.53 |
| -14 | -4 | 6  | 0.14  | 0.51 |
| 13  | -4 | -6 | 0.92  | 0.54 |
| -13 | -4 | 6  | -0.04 | 0.49 |
| 13  | 4  | -6 | 0.43  | 0.46 |
| -13 | 4  | 6  | -0.02 | 0.46 |
| -12 | -4 | 6  | 0.66  | 0.47 |
| 12  | -4 | -6 | 0.43  | 0.49 |
| 12  | 4  | -6 | 0.15  | 0.39 |
| -12 | 4  | 6  | 0.18  | 0.42 |

-11 -4 6 0.00 0.35  
11 -4 -6 -0.38 0.41  
11 4 -6 -0.19 0.36  
-11 4 6 -0.30 0.34  
-11 4 6 -0.64 0.28  
11 4 -6 0.20 0.36  
-10 -4 6 1.78 0.42  
10 -4 -6 1.40 0.44  
10 4 -6 1.64 0.40  
10 4 -6 1.67 0.41  
-10 4 6 1.24 0.33  
-10 4 6 2.27 0.44  
9 -4 -6 0.14 0.39  
-9 -4 6 1.03 0.37  
-9 4 6 0.35 0.28  
9 4 -6 0.67 0.35  
9 4 -6 1.02 0.34  
-9 4 6 0.57 0.32  
8 -4 -6 1.17 0.43  
-8 -4 6 0.23 0.35  
-8 -4 6 1.40 0.38  
8 4 -6 0.90 0.33  
8 4 -6 1.00 0.31  
-8 4 6 0.95 0.33  
8 4 -6 1.72 0.34  
-8 4 6 1.34 0.33  
-7 -4 6 14.14 0.54  
-7 -4 6 14.24 0.71  
7 -4 -6 13.14 0.76  
-7 -4 6 13.25 0.75  
7 4 -6 15.12 0.70  
7 4 -6 15.91 0.62  
-7 4 6 14.22 0.65  
-7 4 6 14.25 0.64  
7 4 -6 13.57 0.69  
-6 -4 6 15.68 0.74  
-6 -4 6 16.56 0.59  
6 -4 -6 15.74 0.84  
-6 -4 6 18.14 0.78  
-6 4 6 18.19 0.67  
-6 4 6 18.38 0.97  
6 4 -6 16.23 0.68  
-6 4 6 16.83 0.65  
6 4 -6 17.75 0.61  
6 4 -6 15.86 0.69  
-5 -4 6 0.05 0.22



-5 -4 6 0.08 0.32  
-5 -4 6 0.08 0.22  
5 -4 -6 0.22 0.19  
5 -4 -6 0.10 0.35  
5 -4 -6 -0.10 0.31  
5 4 -6 -0.18 0.22  
5 4 -6 0.06 0.22  
-5 4 6 -0.32 0.31  
-5 4 6 0.05 0.23  
5 4 -6 -0.10 0.27  
-4 -4 6 18.94 0.64  
4 -4 -6 18.37 0.60  
-4 -4 6 16.56 0.71  
4 -4 -6 18.15 0.90  
4 -4 -6 18.11 0.81  
-4 -4 6 18.91 0.64  
4 4 -6 18.25 0.57  
4 4 -6 18.92 0.66  
-4 4 6 19.32 0.89  
-4 4 6 19.37 0.59  
-4 4 6 19.26 0.66  
4 4 -6 18.64 0.66  
3 -4 -6 32.50 1.20  
3 -4 -6 31.43 1.03  
3 -4 -6 32.55 0.88  
-3 -4 6 32.67 1.00  
-3 4 6 31.13 1.15  
3 4 -6 33.04 0.89  
3 4 -6 31.62 0.91  
3 4 -6 30.88 0.82  
3 4 -6 32.40 0.90  
-3 4 6 32.29 0.90  
-3 4 6 33.78 0.81  
-2 -4 6 26.78 0.71  
2 -4 -6 26.73 1.05  
-2 -4 6 28.44 0.90  
2 -4 -6 26.59 0.79  
-2 -4 6 26.48 0.80  
-2 4 6 25.93 0.78  
-2 4 6 27.51 0.65  
2 4 -6 26.85 0.81  
2 4 -6 26.97 0.76  
-2 4 6 27.17 1.02  
2 4 -6 27.71 0.78  
1 -4 -6 10.76 0.68  
1 -4 -6 11.99 0.52

-1 -4 6 9.69 0.54  
-1 -4 6 11.95 0.52  
1 -4 -6 11.36 0.68  
-1 -4 6 11.67 0.45  
1 4 -6 11.35 0.45  
-1 4 6 12.23 0.29  
-1 4 6 11.34 0.48  
1 4 -6 13.01 0.52  
-1 4 6 11.64 0.58  
1 4 -6 11.72 0.50  
0 -4 6 16.52 0.66  
0 -4 6 16.03 0.67  
0 -4 6 15.98 0.59  
0 -4 -6 17.02 0.65  
0 -4 -6 15.33 0.80  
0 -4 -6 15.81 0.80  
0 4 -6 16.54 0.51  
0 4 -6 16.84 0.65  
0 4 -6 16.79 0.69  
0 4 6 16.98 0.72  
0 4 6 16.25 0.58  
-1 -4 -6 1.34 0.28  
-1 -4 -6 0.93 0.33  
1 -4 6 0.93 0.27  
1 -4 6 0.52 0.32  
-1 -4 -6 1.46 0.35  
1 -4 6 1.64 0.31  
-1 4 -6 1.06 0.17  
1 4 6 0.57 0.36  
-1 4 -6 0.79 0.30  
1 4 6 0.90 0.23  
-1 4 -6 1.16 0.27  
2 -4 6 9.27 0.56  
-2 -4 -6 10.34 0.71  
-2 -4 -6 9.16 0.53  
-2 4 -6 9.64 0.58  
2 4 6 8.72 0.58  
-2 4 -6 8.71 0.32  
2 4 6 9.41 0.70  
-2 4 -6 8.60 0.60  
3 -4 6 4.40 0.48  
3 -4 6 4.79 0.46  
-3 -4 -6 4.39 0.47  
3 -4 6 4.61 0.47  
3 4 6 5.41 0.39  
-3 4 -6 4.58 0.49

-3 4 -6 5.31 0.49  
3 4 6 3.96 0.46  
4 -4 6 1.43 0.38  
4 -4 6 0.97 0.35  
-4 -4 -6 1.27 0.36  
4 4 6 1.43 0.25  
-4 4 -6 1.85 0.34  
4 4 6 1.34 0.43  
5 -4 6 0.73 0.38  
-5 -4 -6 0.19 0.32  
5 -4 6 0.13 0.35  
-5 4 -6 0.33 0.28  
5 4 6 -0.25 0.35  
6 -4 6 0.85 0.36  
-6 -4 -6 0.16 0.33  
6 -4 6 1.14 0.40  
6 4 6 0.56 0.41  
-6 4 -6 0.36 0.31  
7 -4 6 0.83 0.42  
-7 -4 -6 0.57 0.35  
7 -4 6 0.90 0.41  
7 4 6 0.64 0.42  
-7 4 -6 0.16 0.35  
-8 -4 -6 1.24 0.43  
8 -4 6 2.06 0.50  
8 -4 6 2.62 0.53  
8 4 6 2.67 0.54  
-8 4 -6 2.70 0.52  
9 -4 6 0.08 0.52  
9 -4 6 -0.01 0.47  
-9 -4 -6 -0.13 0.46  
-9 4 -6 -0.12 0.36  
9 4 6 0.43 0.47  
-9 4 -6 0.28 0.42  
10 -4 6 0.16 0.49  
10 -4 6 -0.31 0.56  
-10 -4 -6 0.52 0.48  
-10 4 -6 0.26 0.47  
-10 4 -6 -0.07 0.45  
10 4 6 0.16 0.51  
13 -5 -6 -0.32 0.49  
-13 -5 6 -0.02 0.48  
13 5 -6 0.38 0.48  
-13 5 6 0.45 0.48  
12 -5 -6 0.10 0.47  
-12 -5 6 -0.02 0.39

-12 5 6 0.60 0.45  
12 5 -6 -0.14 0.36  
-11 -5 6 -0.34 0.38  
11 -5 -6 0.00 0.43  
-11 5 6 -0.10 0.35  
11 5 -6 0.27 0.38  
-10 -5 6 0.01 0.38  
10 -5 -6 0.56 0.44  
-10 5 6 0.59 0.32  
10 5 -6 0.22 0.36  
-10 5 6 0.84 0.34  
9 -5 -6 -0.38 0.33  
-9 -5 6 -0.12 0.32  
-9 5 6 0.22 0.28  
-9 5 6 0.28 0.29  
9 5 -6 -0.21 0.29  
8 -5 -6 1.52 0.45  
-8 -5 6 1.00 0.36  
-8 5 6 0.81 0.28  
-8 5 6 0.53 0.30  
8 5 -6 0.49 0.31  
8 5 -6 1.09 0.33  
7 -5 -6 13.61 0.82  
-7 -5 6 11.65 0.67  
-7 -5 6 12.95 0.57  
-7 5 6 11.98 0.61  
7 5 -6 12.15 0.63  
7 5 -6 13.19 0.55  
-7 5 6 11.98 0.59  
-6 -5 6 4.52 0.41  
-6 -5 6 4.89 0.40  
6 -5 -6 6.61 0.62  
-6 -5 6 4.42 0.50  
6 5 -6 4.58 0.37  
-6 5 6 4.86 0.43  
6 5 -6 4.64 0.44  
6 5 -6 5.08 0.34  
5 -5 -6 2.68 0.43  
-5 -5 6 2.21 0.27  
-5 -5 6 2.38 0.33  
-5 -5 6 2.40 0.39  
5 -5 -6 3.06 0.30  
-5 5 6 3.05 0.31  
5 5 -6 2.16 0.33  
-5 5 6 2.36 0.44  
5 5 -6 2.32 0.26

-5 5 6 2.90 0.36  
5 5 -6 2.58 0.24  
4 -5 -6 3.93 0.50  
4 -5 -6 3.35 0.35  
-4 -5 6 2.82 0.39  
4 -5 -6 2.82 0.48  
-4 5 6 4.15 0.31  
-4 5 6 3.98 0.50  
4 5 -6 3.60 0.26  
-4 5 6 2.84 0.34  
4 5 -6 3.29 0.23  
4 5 -6 2.48 0.33  
3 -5 -6 37.35 1.16  
-3 -5 6 35.42 1.08  
3 -5 -6 36.03 1.01  
3 -5 -6 35.58 1.31  
-3 -5 6 35.54 1.01  
3 5 -6 33.60 0.83  
3 5 -6 36.13 0.90  
-3 5 6 36.15 0.86  
-3 5 6 35.60 1.27  
3 5 -6 35.45 0.97  
-3 5 6 34.64 0.98  
3 5 -6 34.22 0.91  
2 -5 -6 10.55 0.52  
-2 -5 6 10.48 0.57  
2 -5 -6 9.96 0.67  
-2 -5 6 9.75 0.54  
2 -5 -6 9.68 0.59  
2 5 -6 9.37 0.42  
2 5 -6 9.48 0.39  
2 5 -6 8.59 0.36  
-2 5 6 9.32 0.31  
-2 5 6 9.48 0.48  
-2 5 6 9.76 0.65  
2 5 -6 9.29 0.45  
-1 -5 6 1.67 0.36  
-1 -5 6 1.30 0.22  
1 -5 -6 1.90 0.32  
1 -5 -6 1.47 0.36  
-1 -5 6 1.19 0.30  
1 -5 -6 1.43 0.35  
-1 5 6 1.92 0.38  
-1 5 6 1.90 0.29  
1 5 -6 1.87 0.26  
1 5 -6 1.46 0.22

|    |    |    |       |      |
|----|----|----|-------|------|
| 1  | 5  | -6 | 1.17  | 0.22 |
| 0  | -5 | -6 | 37.76 | 1.30 |
| 0  | -5 | 6  | 35.99 | 1.10 |
| 0  | -5 | -6 | 36.99 | 1.09 |
| 0  | -5 | 6  | 36.00 | 0.95 |
| 0  | -5 | 6  | 36.48 | 1.06 |
| 0  | -5 | -6 | 35.25 | 1.26 |
| 0  | 5  | -6 | 36.64 | 0.90 |
| 0  | 5  | 6  | 36.26 | 1.13 |
| 0  | 5  | -6 | 35.83 | 1.10 |
| 0  | 5  | -6 | 36.73 | 1.04 |
| 0  | 5  | 6  | 36.93 | 1.00 |
| 1  | -5 | 6  | 1.92  | 0.32 |
| 1  | -5 | 6  | 2.03  | 0.32 |
| -1 | -5 | -6 | 1.37  | 0.35 |
| -1 | -5 | -6 | 2.49  | 0.38 |
| -1 | -5 | -6 | 1.94  | 0.41 |
| 1  | -5 | 6  | 1.15  | 0.33 |
| -1 | 5  | -6 | 2.10  | 0.32 |
| -1 | 5  | -6 | 1.39  | 0.31 |
| 1  | 5  | 6  | 2.37  | 0.31 |
| 1  | 5  | 6  | 2.08  | 0.37 |
| -1 | 5  | -6 | 2.02  | 0.22 |
| 2  | -5 | 6  | 13.79 | 0.71 |
| -2 | -5 | -6 | 15.59 | 0.73 |
| 2  | -5 | 6  | 14.32 | 0.69 |
| 2  | -5 | 6  | 15.23 | 0.66 |
| -2 | -5 | -6 | 14.08 | 0.84 |
| 2  | 5  | 6  | 14.25 | 0.76 |
| -2 | 5  | -6 | 14.72 | 0.71 |
| 2  | 5  | 6  | 15.73 | 0.62 |
| 3  | -5 | 6  | 4.50  | 0.48 |
| -3 | -5 | -6 | 4.14  | 0.46 |
| -3 | 5  | -6 | 3.40  | 0.44 |
| -3 | 5  | -6 | 4.08  | 0.47 |
| 3  | 5  | 6  | 4.20  | 0.52 |
| 4  | -5 | 6  | 4.64  | 0.48 |
| -4 | -5 | -6 | 4.59  | 0.49 |
| 4  | -5 | 6  | 3.98  | 0.51 |
| 4  | 5  | 6  | 4.16  | 0.37 |
| 4  | 5  | 6  | 5.22  | 0.53 |
| -4 | 5  | -6 | 3.88  | 0.45 |
| 5  | -5 | 6  | 1.66  | 0.43 |
| -5 | -5 | -6 | 1.63  | 0.41 |
| 5  | -5 | 6  | 2.18  | 0.41 |
| 5  | 5  | 6  | 1.70  | 0.30 |

-5 5 -6 1.82 0.39  
5 5 6 1.18 0.43  
6 -5 6 1.42 0.41  
-6 -5 -6 0.66 0.40  
6 -5 6 1.16 0.42  
6 5 6 1.66 0.46  
-6 5 -6 0.89 0.40  
7 -5 6 4.59 0.57  
7 -5 6 3.69 0.54  
-7 -5 -6 4.28 0.59  
7 5 6 3.32 0.56  
-7 5 -6 3.07 0.52  
8 -5 6 0.87 0.46  
8 -5 6 1.18 0.47  
-8 -5 -6 0.70 0.42  
8 5 6 1.10 0.49  
-8 5 -6 0.11 0.43  
-9 -5 -6 0.11 0.47  
9 -5 6 0.62 0.51  
9 5 6 0.96 0.51  
-9 5 -6 0.02 0.44  
10 -5 6 0.86 0.55  
-10 -5 -6 0.22 0.55  
10 -5 6 0.78 0.61  
-10 5 -6 -0.32 0.47  
10 5 6 0.10 0.56  
-10 5 -6 0.60 0.47  
13 -6 -6 -0.19 0.51  
-13 -6 6 0.33 0.50  
-13 6 6 0.63 0.50  
13 6 -6 0.37 0.43  
-12 -6 6 0.51 0.41  
12 -6 -6 0.47 0.51  
-12 6 6 0.15 0.38  
12 6 -6 0.54 0.46  
11 -6 -6 0.32 0.49  
-11 -6 6 0.17 0.42  
-11 6 6 0.04 0.36  
11 6 -6 -0.25 0.39  
10 -6 -6 -0.03 0.42  
-10 -6 6 0.34 0.40  
10 6 -6 0.42 0.34  
-10 6 6 0.18 0.30  
-10 6 6 0.45 0.34  
-9 -6 6 2.31 0.44  
9 -6 -6 1.66 0.48

-9 6 6 1.62 0.38  
-9 6 6 2.78 0.42  
9 6 -6 1.73 0.39  
-8 -6 6 2.89 0.48  
8 -6 -6 2.52 0.47  
8 6 -6 3.19 0.43  
-8 6 6 2.78 0.38  
-8 6 6 3.48 0.39  
-7 -6 6 1.08 0.36  
-7 -6 6 1.00 0.31  
7 -6 -6 1.03 0.44  
-7 6 6 0.93 0.30  
-7 6 6 0.74 0.28  
7 6 -6 0.84 0.32  
6 -6 -6 11.65 0.79  
-6 -6 6 11.31 0.61  
-6 -6 6 11.96 0.67  
6 6 -6 12.47 0.67  
-6 6 6 11.15 0.59  
-5 -6 6 3.09 0.42  
5 -6 -6 4.07 0.55  
5 -6 -6 3.96 0.37  
-5 6 6 4.11 0.40  
-5 6 6 3.65 0.33  
5 6 -6 3.90 0.42  
-4 -6 6 4.02 0.48  
4 -6 -6 3.50 0.49  
4 -6 -6 4.20 0.41  
-4 -6 6 4.25 0.44  
4 6 -6 4.85 0.43  
-4 6 6 3.05 0.47  
-4 6 6 4.32 0.31  
-4 6 6 4.11 0.40  
3 -6 -6 30.36 0.97  
-3 -6 6 27.81 0.95  
3 -6 -6 28.62 1.20  
3 -6 -6 30.67 1.09  
-3 -6 6 29.41 1.02  
-3 6 6 31.07 0.76  
-3 6 6 29.96 1.18  
3 6 -6 29.68 0.91  
-3 6 6 28.63 0.91  
2 -6 -6 7.46 0.66  
-2 -6 6 6.03 0.51  
2 -6 -6 7.67 0.61  
-2 -6 6 8.41 0.56



|    |    |    |       |      |
|----|----|----|-------|------|
| 2  | -6 | -6 | 7.82  | 0.54 |
| -2 | 6  | 6  | 6.97  | 0.59 |
| -2 | 6  | 6  | 7.66  | 0.48 |
| 2  | 6  | -6 | 7.49  | 0.44 |
| -1 | -6 | 6  | 38.41 | 1.19 |
| 1  | -6 | -6 | 40.16 | 1.18 |
| -1 | -6 | 6  | 40.99 | 1.07 |
| 1  | -6 | -6 | 40.06 | 1.41 |
| 1  | -6 | -6 | 40.10 | 1.36 |
| -1 | 6  | 6  | 38.54 | 1.09 |
| 1  | 6  | -6 | 40.53 | 1.03 |
| 1  | 6  | -6 | 38.73 | 1.01 |
| -1 | 6  | 6  | 40.11 | 1.23 |
| 1  | 6  | -6 | 39.41 | 1.04 |
| 0  | -6 | 6  | 8.10  | 0.47 |
| 0  | -6 | -6 | 9.15  | 0.55 |
| 0  | -6 | 6  | 9.05  | 0.56 |
| 0  | -6 | -6 | 9.42  | 0.70 |
| 0  | -6 | -6 | 7.70  | 0.65 |
| 0  | -6 | 6  | 8.23  | 0.41 |
| 0  | 6  | 6  | 8.05  | 0.49 |
| 0  | 6  | 6  | 9.25  | 0.64 |
| 0  | 6  | -6 | 8.21  | 0.54 |
| 0  | 6  | -6 | 8.37  | 0.46 |
| 0  | 6  | -6 | 9.17  | 0.45 |
| -1 | -6 | -6 | 39.95 | 1.39 |
| 1  | -6 | 6  | 39.51 | 1.05 |
| 1  | -6 | 6  | 37.86 | 1.18 |
| -1 | -6 | -6 | 38.97 | 1.21 |
| 1  | -6 | 6  | 39.33 | 1.16 |
| -1 | 6  | -6 | 38.50 | 1.14 |
| 1  | 6  | 6  | 37.48 | 1.21 |
| -1 | 6  | -6 | 37.05 | 0.95 |
| 1  | 6  | 6  | 38.93 | 1.08 |
| -2 | -6 | -6 | 2.04  | 0.41 |
| 2  | -6 | 6  | 1.85  | 0.35 |
| 2  | -6 | 6  | 1.71  | 0.33 |
| 2  | -6 | 6  | 2.04  | 0.39 |
| 2  | 6  | 6  | 2.15  | 0.35 |
| -2 | 6  | -6 | 2.42  | 0.35 |
| 2  | 6  | 6  | 1.74  | 0.43 |
| -2 | 6  | -6 | 1.70  | 0.38 |
| 3  | -6 | 6  | 6.54  | 0.55 |
| 3  | -6 | 6  | 6.64  | 0.51 |
| -3 | -6 | -6 | 7.38  | 0.59 |
| 3  | -6 | 6  | 6.63  | 0.57 |

-3 6 -6 7.49 0.59  
3 6 6 7.36 0.45  
-3 6 -6 6.79 0.56  
3 6 6 7.16 0.61  
4 -6 6 4.03 0.51  
-4 -6 -6 3.25 0.45  
4 6 6 4.17 0.54  
-4 6 -6 3.01 0.46  
4 6 6 3.58 0.50  
-5 -6 -6 0.44 0.35  
5 -6 6 0.52 0.34  
5 -6 6 0.83 0.41  
5 6 6 0.73 0.42  
5 6 6 -0.08 0.23  
-5 6 -6 0.90 0.39  
6 -6 6 0.47 0.36  
-6 -6 -6 0.25 0.38  
6 -6 6 0.36 0.39  
6 6 6 -0.25 0.38  
-6 6 -6 0.17 0.32  
-7 -6 -6 1.09 0.47  
7 -6 6 0.79 0.42  
7 -6 6 0.98 0.45  
7 6 6 0.62 0.46  
-7 6 -6 0.34 0.41  
8 -6 6 0.90 0.49  
8 -6 6 0.98 0.46  
-8 -6 -6 -0.33 0.46  
8 6 6 0.38 0.49  
-8 6 -6 0.60 0.47  
9 -6 6 -0.09 0.47  
9 -6 6 -0.45 0.46  
-9 -6 -6 -0.54 0.49  
-9 6 -6 -0.49 0.42  
9 6 6 0.24 0.51  
10 -6 6 -0.20 0.55  
10 -6 6 0.17 0.78  
-10 6 -6 1.00 0.52  
-13 -7 6 0.35 0.51  
13 7 -6 0.01 0.49  
-13 7 6 -0.48 0.44  
12 -7 -6 0.70 0.53  
-12 -7 6 0.85 0.50  
12 7 -6 0.54 0.50  
-12 7 6 0.95 0.44  
11 -7 -6 0.60 0.48

-11 -7 6 0.59 0.44  
11 7 -6 0.56 0.40  
-11 7 6 -0.54 0.37  
-10 -7 6 0.18 0.35  
10 -7 -6 0.53 0.48  
-10 7 6 -0.46 0.32  
-10 7 6 -0.22 0.31  
10 7 -6 0.05 0.33  
-9 -7 6 0.24 0.32  
9 -7 -6 0.07 0.41  
-9 7 6 0.08 0.31  
-9 7 6 0.00 0.31  
9 7 -6 0.04 0.36  
-8 -7 6 1.57 0.44  
8 -7 -6 0.86 0.46  
-8 7 6 1.27 0.34  
-8 7 6 1.48 0.34  
8 7 -6 0.98 0.36  
-7 -7 6 10.99 0.72  
7 -7 -6 10.93 0.80  
-7 -7 6 10.28 0.60  
-7 7 6 10.37 0.60  
-7 7 6 9.88 0.84  
7 7 -6 10.38 0.63  
6 -7 -6 4.95 0.61  
-6 -7 6 5.05 0.52  
-6 7 6 6.03 0.53  
6 7 -6 5.25 0.48  
-6 7 6 5.29 0.41  
-5 -7 6 11.72 0.64  
5 -7 -6 11.76 0.59  
-5 -7 6 12.58 0.68  
5 -7 -6 10.37 0.78  
-5 7 6 11.49 0.61  
5 7 -6 11.16 0.62  
-5 7 6 11.38 0.49  
4 -7 -6 1.71 0.42  
4 -7 -6 2.27 0.39  
-4 -7 6 1.42 0.41  
-4 -7 6 1.46 0.38  
-4 7 6 2.60 0.41  
-4 7 6 2.06 0.25  
4 7 -6 2.03 0.36  
-3 -7 6 9.96 0.66  
-3 -7 6 9.02 0.62  
3 -7 -6 10.34 0.67

|    |    |    |       |      |
|----|----|----|-------|------|
| 3  | -7 | -6 | 9.23  | 0.71 |
| 3  | 7  | -6 | 8.91  | 0.53 |
| -3 | 7  | 6  | 9.43  | 0.73 |
| -3 | 7  | 6  | 7.60  | 0.53 |
| -2 | -7 | 6  | 13.88 | 0.66 |
| 2  | -7 | -6 | 14.44 | 0.78 |
| -2 | -7 | 6  | 14.01 | 0.74 |
| 2  | -7 | -6 | 12.29 | 0.66 |
| 2  | 7  | -6 | 12.89 | 0.61 |
| -2 | 7  | 6  | 12.34 | 0.77 |
| -2 | 7  | 6  | 13.31 | 0.62 |
| -1 | -7 | 6  | 9.66  | 0.61 |
| 1  | -7 | -6 | 9.41  | 0.73 |
| 1  | -7 | -6 | 9.48  | 0.60 |
| -1 | -7 | 6  | 9.55  | 0.64 |
| 1  | 7  | -6 | 8.95  | 0.51 |
| -1 | 7  | 6  | 8.63  | 0.53 |
| 0  | -7 | 6  | 11.69 | 0.71 |
| 0  | -7 | -6 | 12.52 | 0.68 |
| 0  | -7 | -6 | 12.55 | 0.91 |
| 0  | 7  | -6 | 12.57 | 0.67 |
| 0  | 7  | 6  | 12.09 | 0.60 |
| 0  | 7  | 6  | 12.10 | 0.71 |
| 0  | 7  | -6 | 13.35 | 0.56 |
| -1 | -7 | -6 | 3.06  | 0.44 |
| 1  | -7 | 6  | 2.83  | 0.42 |
| 1  | 7  | 6  | 3.22  | 0.49 |
| 1  | 7  | 6  | 3.90  | 0.40 |
| -1 | 7  | -6 | 3.00  | 0.30 |
| -1 | 7  | -6 | 2.37  | 0.39 |
| 2  | -7 | 6  | 6.56  | 0.48 |
| -2 | -7 | -6 | 7.03  | 0.58 |
| 2  | -7 | 6  | 6.40  | 0.55 |
| 2  | 7  | 6  | 7.27  | 0.59 |
| 2  | 7  | 6  | 7.69  | 0.53 |
| -2 | 7  | -6 | 6.47  | 0.56 |
| 3  | -7 | 6  | 5.18  | 0.57 |
| 3  | -7 | 6  | 7.19  | 0.52 |
| -3 | -7 | -6 | 5.69  | 0.58 |
| 3  | 7  | 6  | 5.38  | 0.56 |
| -3 | 7  | -6 | 5.36  | 0.54 |
| 3  | 7  | 6  | 7.06  | 0.52 |
| -4 | -7 | -6 | 0.46  | 0.37 |
| 4  | -7 | 6  | 0.90  | 0.34 |
| 4  | -7 | 6  | 0.65  | 0.35 |
| -4 | 7  | -6 | 0.38  | 0.35 |

4 7 6 1.19 0.33  
4 7 6 1.53 0.44  
-5 -7 -6 3.12 0.54  
5 -7 6 3.53 0.54  
5 7 6 4.49 0.57  
-5 7 -6 3.90 0.54  
5 7 6 3.31 0.53  
-6 -7 -6 1.50 0.47  
6 -7 6 1.37 0.42  
6 -7 6 1.78 0.47  
6 7 6 2.75 0.53  
-6 7 -6 0.77 0.42  
7 -7 6 0.70 0.43  
7 -7 6 0.57 0.41  
-7 -7 -6 0.15 0.45  
-7 7 -6 0.03 0.43  
7 7 6 0.57 0.45  
8 -7 6 0.15 0.44  
8 -7 6 -0.02 0.43  
-8 -7 -6 -0.59 0.46  
-8 7 -6 0.00 0.47  
8 7 6 0.82 0.52  
9 -7 6 0.01 0.47  
-9 -7 -6 -0.74 0.53  
9 -7 6 -0.39 0.45  
-9 7 -6 -0.24 0.46  
9 7 6 0.40 0.55  
-13 -8 6 0.54 0.80  
13 8 -6 -0.14 0.48  
12 -8 -6 -0.25 0.52  
-12 -8 6 -0.20 0.47  
-12 8 6 0.28 0.45  
12 8 -6 -0.05 0.41  
11 -8 -6 -0.03 0.51  
-11 -8 6 -0.02 0.44  
-11 8 6 -0.02 0.38  
11 8 -6 -0.36 0.39  
10 -8 -6 -0.07 0.41  
-10 -8 6 0.78 0.44  
10 8 -6 0.02 0.41  
-10 8 6 0.49 0.37  
9 -8 -6 0.52 0.41  
-9 -8 6 1.00 0.37  
-9 8 6 0.83 0.38  
9 8 -6 0.32 0.34  
-9 8 6 0.31 0.33

-8 -8 6 1.13 0.41  
-8 -8 6 1.15 0.42  
8 -8 -6 0.89 0.47  
-8 8 6 0.68 0.36  
-8 8 6 0.76 0.32  
8 8 -6 0.44 0.37  
7 -8 -6 3.02 0.51  
-7 -8 6 2.64 0.47  
-7 8 6 3.82 0.48  
7 8 -6 2.47 0.40  
6 -8 -6 4.93 0.60  
-6 -8 6 4.98 0.55  
-6 -8 6 5.26 0.52  
-6 8 6 5.39 0.52  
6 8 -6 4.07 0.46  
-6 8 6 5.06 0.43  
-5 -8 6 2.23 0.45  
5 -8 -6 2.21 0.49  
-5 -8 6 1.98 0.43  
5 -8 -6 1.57 0.35  
-5 8 6 1.72 0.28  
-5 8 6 1.46 0.36  
5 8 -6 1.70 0.36  
-4 -8 6 2.38 0.45  
4 -8 -6 2.47 0.42  
4 -8 -6 2.99 0.51  
-4 -8 6 2.45 0.40  
-4 8 6 2.52 0.39  
4 8 -6 2.32 0.36  
-3 -8 6 1.35 0.41  
-3 -8 6 1.12 0.36  
3 -8 -6 1.59 0.43  
3 -8 -6 2.51 0.47  
-3 8 6 0.70 0.31  
3 8 -6 1.26 0.32  
2 -8 -6 -0.13 0.35  
-2 -8 6 0.44 0.36  
-2 -8 6 -0.07 0.35  
2 -8 -6 0.17 0.38  
2 8 -6 0.19 0.27  
-2 8 6 0.63 0.30  
-1 -8 6 1.96 0.40  
1 -8 -6 3.45 0.51  
1 -8 -6 2.96 0.49  
1 8 -6 2.15 0.40  
1 8 -6 2.58 0.33

-1 8 6 2.96 0.39  
0 -8 -6 8.03 0.67  
0 -8 6 6.77 0.56  
0 8 6 7.67 0.63  
0 8 6 6.24 0.51  
0 8 -6 7.13 0.46  
0 8 -6 5.81 0.55  
-1 -8 -6 -0.59 0.35  
1 -8 6 -0.33 0.34  
1 8 6 0.35 0.27  
1 8 6 0.74 0.38  
-1 8 -6 -0.05 0.31  
-1 8 -6 -0.17 0.23  
2 -8 6 -0.33 0.29  
-2 -8 -6 0.08 0.37  
-2 8 -6 0.15 0.33  
2 8 6 0.13 0.25  
2 8 6 -0.05 0.33  
-3 -8 -6 2.63 0.47  
3 -8 6 2.28 0.46  
3 8 6 2.20 0.44  
3 8 6 3.40 0.41  
-3 8 -6 2.39 0.42  
4 -8 6 1.55 0.40  
-4 -8 -6 1.41 0.46  
-4 8 -6 2.05 0.45  
4 8 6 1.61 0.46  
4 8 6 1.95 0.36  
5 -8 6 0.37 0.41  
-5 -8 -6 -0.28 0.34  
5 8 6 0.52 0.42  
5 8 6 0.00 0.30  
-5 8 -6 -0.16 0.36  
-6 -8 -6 0.21 0.47  
6 -8 6 0.48 0.43  
6 8 6 0.11 0.42  
-6 8 -6 0.12 0.41  
-7 -8 -6 -0.02 0.47  
7 -8 6 0.34 0.40  
7 -8 6 0.30 0.49  
-7 8 -6 0.27 0.45  
7 8 6 0.84 0.49  
8 -8 6 -0.22 0.44  
8 -8 6 0.62 0.54  
-8 -8 -6 0.13 0.55  
8 8 6 0.18 0.48

-8 8 -6 -0.01 0.41  
9 -8 6 0.43 0.54  
9 -8 6 0.68 0.81  
9 8 6 0.61 0.54  
-12 -9 6 0.60 0.50  
12 -9 -6 -0.14 0.58  
12 9 -6 -0.19 0.49  
-12 9 6 0.13 0.44  
11 -9 -6 0.07 0.49  
-11 -9 6 0.72 0.49  
-11 9 6 -0.08 0.39  
11 9 -6 0.11 0.41  
10 -9 -6 0.16 0.48  
-10 -9 6 -0.35 0.41  
-10 9 6 -0.46 0.36  
10 9 -6 -0.68 0.37  
-9 -9 6 2.06 0.45  
9 -9 -6 1.27 0.51  
-9 9 6 2.56 0.47  
-9 9 6 1.81 0.44  
9 9 -6 1.62 0.48  
8 -9 -6 -0.17 0.38  
-8 -9 6 -0.19 0.35  
-8 9 6 0.34 0.31  
-8 9 6 0.48 0.36  
8 9 -6 0.65 0.38  
7 -9 -6 2.07 0.51  
-7 -9 6 1.10 0.40  
-7 -9 6 2.08 0.46  
-7 9 6 1.12 0.32  
7 9 -6 1.65 0.41  
-7 9 6 0.69 0.35  
-6 -9 6 5.18 0.56  
-6 -9 6 5.09 0.57  
6 -9 -6 5.98 0.67  
-6 9 6 5.17 0.52  
6 9 -6 4.05 0.49  
-5 -9 6 0.66 0.38  
5 -9 -6 1.26 0.47  
5 -9 -6 1.16 0.36  
-5 -9 6 1.32 0.42  
5 9 -6 0.89 0.36  
-5 9 6 1.55 0.37  
-4 -9 6 3.98 0.49  
4 -9 -6 4.02 0.55  
4 -9 -6 4.22 0.49



-4 -9 6 4.87 0.55  
-4 9 6 4.35 0.48  
4 9 -6 3.59 0.44  
-3 -9 6 2.01 0.40  
3 -9 -6 1.53 0.44  
-3 -9 6 0.93 0.38  
3 -9 -6 1.09 0.43  
3 9 -6 1.22 0.37  
-3 9 6 1.10 0.35  
-2 -9 6 2.91 0.44  
-2 -9 6 2.42 0.43  
2 -9 -6 3.03 0.52  
2 -9 -6 2.57 0.48  
2 9 -6 1.88 0.37  
-2 9 6 1.64 0.37  
1 -9 -6 1.94 0.44  
1 -9 -6 2.18 0.48  
-1 -9 6 1.74 0.44  
1 9 -6 1.81 0.41  
-1 9 6 1.98 0.37  
1 9 -6 0.90 0.32  
0 -9 -6 4.45 0.60  
0 -9 6 4.86 0.53  
0 9 -6 4.81 0.51  
0 9 6 4.16 0.49  
0 9 -6 5.12 0.44  
1 -9 6 5.86 0.57  
-1 -9 -6 7.67 0.72  
-1 9 -6 5.92 0.59  
-1 9 -6 7.26 0.50  
1 9 6 7.66 0.63  
1 9 6 6.62 0.55  
2 -9 6 2.19 0.47  
-2 -9 -6 3.07 0.52  
2 9 6 2.66 0.40  
-2 9 -6 2.71 0.48  
2 9 6 3.69 0.51  
3 -9 6 -0.12 0.37  
-3 -9 -6 1.02 0.46  
-3 9 -6 0.81 0.35  
3 9 6 0.27 0.33  
3 9 6 0.47 0.39  
4 -9 6 -0.03 0.34  
-4 -9 -6 -0.26 0.41  
-4 9 -6 0.33 0.32  
4 9 6 -0.18 0.37

4 9 6 -0.01 0.28  
5 -9 6 0.12 0.40  
-5 -9 -6 0.36 0.40  
5 9 6 0.27 0.44  
5 9 6 0.53 0.35  
-5 9 -6 -0.07 0.38  
6 -9 6 0.44 0.46  
-6 -9 -6 0.42 0.50  
-6 9 -6 0.49 0.40  
6 9 6 0.59 0.37  
6 9 6 1.10 0.50  
7 -9 6 0.92 0.49  
-7 -9 -6 0.42 0.55  
-7 9 -6 -0.16 0.44  
7 9 6 0.66 0.51  
-8 -9 -6 -0.25 0.59  
8 -9 6 0.11 0.45  
-8 9 -6 0.25 0.43  
8 9 6 -0.01 0.52  
-12 -10 6 0.13 0.49  
-12 10 6 0.33 0.49  
11 -10 -6 -0.47 0.51  
-11 -10 6 -0.38 0.44  
11 10 -6 0.01 0.45  
-11 10 6 -0.27 0.41  
10 -10 -6 0.94 0.56  
-10 -10 6 0.27 0.44  
-10 10 6 0.96 0.44  
10 10 -6 0.19 0.43  
9 -10 -6 0.56 0.48  
-9 -10 6 0.48 0.38  
-9 10 6 0.81 0.44  
-9 10 6 0.01 0.50  
9 10 -6 0.29 0.42  
-8 -10 6 1.25 0.45  
-8 -10 6 0.89 0.42  
8 -10 -6 0.94 0.48  
8 10 -6 0.74 0.41  
-8 10 6 1.69 0.46  
7 -10 -6 0.62 0.48  
-7 -10 6 0.36 0.40  
-7 -10 6 -0.08 0.34  
7 10 -6 0.45 0.37  
-7 10 6 0.50 0.39  
-6 -10 6 -0.03 0.37  
6 -10 -6 0.78 0.47

|    |     |    |       |      |
|----|-----|----|-------|------|
| -6 | -10 | 6  | 0.05  | 0.36 |
| 6  | 10  | -6 | 0.23  | 0.39 |
| -6 | 10  | 6  | 0.16  | 0.35 |
| 5  | -10 | -6 | 2.53  | 0.53 |
| -5 | -10 | 6  | 2.19  | 0.48 |
| -5 | -10 | 6  | 2.09  | 0.45 |
| 5  | -10 | -6 | 2.62  | 0.45 |
| -5 | 10  | 6  | 3.31  | 0.51 |
| 5  | 10  | -6 | 2.26  | 0.43 |
| 4  | -10 | -6 | 0.70  | 0.38 |
| -4 | -10 | 6  | 0.21  | 0.40 |
| 4  | -10 | -6 | -0.20 | 0.40 |
| -4 | -10 | 6  | 0.15  | 0.36 |
| -4 | 10  | 6  | 0.25  | 0.32 |
| 4  | 10  | -6 | 0.06  | 0.32 |
| 3  | -10 | -6 | 2.05  | 0.47 |
| -3 | -10 | 6  | 1.71  | 0.40 |
| 3  | -10 | -6 | 2.46  | 0.49 |
| -3 | -10 | 6  | 2.19  | 0.49 |
| -3 | 10  | 6  | 1.57  | 0.38 |
| 3  | 10  | -6 | 2.17  | 0.40 |
| -2 | -10 | 6  | 0.16  | 0.35 |
| 2  | -10 | -6 | 0.57  | 0.43 |
| 2  | -10 | -6 | -0.17 | 0.37 |
| 2  | 10  | -6 | 0.88  | 0.32 |
| -2 | 10  | 6  | 0.95  | 0.39 |
| 1  | -10 | -6 | 3.99  | 0.61 |
| 1  | -10 | -6 | 4.55  | 0.56 |
| -1 | -10 | 6  | 4.24  | 0.52 |
| -1 | 10  | 6  | 4.06  | 0.47 |
| 1  | 10  | -6 | 3.63  | 0.42 |
| 1  | 10  | -6 | 3.89  | 0.52 |
| 0  | -10 | -6 | 1.70  | 0.45 |
| 0  | -10 | -6 | 1.73  | 0.47 |
| 0  | -10 | 6  | 0.96  | 0.38 |
| 0  | 10  | -6 | 0.92  | 0.32 |
| 0  | 10  | 6  | 0.70  | 0.33 |
| 0  | 10  | -6 | 1.62  | 0.39 |
| -1 | -10 | -6 | 2.79  | 0.59 |
| 1  | -10 | 6  | 2.90  | 0.48 |
| 1  | 10  | 6  | 4.78  | 0.55 |
| 1  | 10  | 6  | 3.80  | 0.50 |
| -1 | 10  | -6 | 3.98  | 0.54 |
| -2 | -10 | -6 | -0.45 | 0.41 |
| 2  | -10 | 6  | 0.70  | 0.42 |
| 2  | 10  | 6  | 0.23  | 0.30 |

2 10 6 0.17 0.39  
-2 10 -6 -0.36 0.34  
3 -10 6 0.66 0.42  
-3 -10 -6 -0.56 0.40  
3 10 6 0.53 0.40  
-3 10 -6 -0.05 0.36  
3 10 6 -0.20 0.32  
4 -10 6 0.01 0.41  
-4 -10 -6 0.06 0.46  
4 10 6 -0.36 0.39  
4 10 6 -0.14 0.30  
-4 10 -6 0.13 0.35  
-5 -10 -6 0.10 0.51  
5 -10 6 0.67 0.45  
5 10 6 0.51 0.39  
5 10 6 0.22 0.44  
-5 10 -6 0.15 0.38  
6 -10 6 0.46 0.43  
-6 -10 -6 0.41 0.57  
6 10 6 0.70 0.39  
-6 10 -6 -0.13 0.40  
6 10 6 0.20 0.50  
-7 -10 -6 0.06 0.59  
7 -10 6 -0.66 0.44  
7 10 6 -0.37 0.51  
-7 10 -6 0.39 0.52  
-11 -11 6 -0.43 0.46  
10 -11 -6 -0.25 0.54  
-10 -11 6 0.51 0.46  
10 11 -6 -0.21 0.46  
9 -11 -6 -0.27 0.51  
-9 -11 6 0.23 0.42  
9 11 -6 0.65 0.52  
-8 -11 6 -0.04 0.43  
-8 -11 6 0.82 0.45  
8 -11 -6 1.14 0.54  
-8 11 6 0.08 0.43  
8 11 -6 0.61 0.49  
-7 -11 6 0.48 0.40  
7 -11 -6 -0.11 0.47  
-7 -11 6 0.24 0.43  
7 11 -6 -0.02 0.39  
-7 11 6 0.64 0.39  
6 -11 -6 0.20 0.45  
-6 -11 6 0.41 0.36  
-6 -11 6 1.36 0.47

|    |     |    |       |      |
|----|-----|----|-------|------|
| -6 | 11  | 6  | 1.42  | 0.42 |
| 6  | 11  | -6 | 0.50  | 0.38 |
| -5 | -11 | 6  | 1.40  | 0.43 |
| 5  | -11 | -6 | 1.02  | 0.50 |
| -5 | -11 | 6  | 0.73  | 0.44 |
| 5  | -11 | -6 | 1.09  | 0.40 |
| -5 | 11  | 6  | 1.10  | 0.41 |
| 5  | 11  | -6 | 1.18  | 0.41 |
| -4 | -11 | 6  | 6.09  | 0.66 |
| 4  | -11 | -6 | 7.05  | 0.66 |
| -4 | -11 | 6  | 5.83  | 0.61 |
| 4  | -11 | -6 | 7.06  | 0.72 |
| -4 | 11  | 6  | 5.97  | 0.62 |
| 4  | 11  | -6 | 7.36  | 0.63 |
| -3 | -11 | 6  | 2.01  | 0.46 |
| 3  | -11 | -6 | 2.18  | 0.51 |
| -3 | -11 | 6  | 2.73  | 0.50 |
| 3  | -11 | -6 | 2.10  | 0.50 |
| 3  | 11  | -6 | 2.42  | 0.48 |
| -3 | 11  | 6  | 3.06  | 0.47 |
| 2  | -11 | -6 | 0.10  | 0.45 |
| 2  | -11 | -6 | 1.12  | 0.45 |
| -2 | -11 | 6  | 1.06  | 0.42 |
| 2  | 11  | -6 | 0.77  | 0.40 |
| 2  | 11  | -6 | 0.17  | 0.32 |
| -2 | 11  | 6  | 0.45  | 0.35 |
| 1  | -11 | -6 | 1.50  | 0.47 |
| 1  | -11 | -6 | 1.24  | 0.48 |
| -1 | -11 | 6  | 0.93  | 0.43 |
| -1 | 11  | 6  | 1.51  | 0.38 |
| 1  | 11  | -6 | 0.59  | 0.39 |
| 1  | 11  | -6 | 0.43  | 0.36 |
| 0  | -11 | -6 | 1.75  | 0.46 |
| 0  | -11 | -6 | 1.48  | 0.56 |
| 0  | -11 | 6  | 0.60  | 0.39 |
| 0  | 11  | 6  | 1.82  | 0.41 |
| 0  | 11  | -6 | 0.97  | 0.38 |
| 0  | 11  | -6 | 1.43  | 0.38 |
| -1 | -11 | -6 | 1.07  | 0.40 |
| -1 | -11 | -6 | -0.18 | 0.43 |
| 1  | -11 | 6  | 0.59  | 0.41 |
| 1  | 11  | 6  | 0.11  | 0.33 |
| -1 | 11  | -6 | 0.24  | 0.38 |
| 2  | -11 | 6  | 0.62  | 0.42 |
| -2 | -11 | -6 | 0.02  | 0.48 |
| 2  | 11  | 6  | 0.44  | 0.44 |

|     |     |    |       |      |
|-----|-----|----|-------|------|
| 2   | 11  | 6  | 0.14  | 0.32 |
| -2  | 11  | -6 | 0.77  | 0.40 |
| -3  | -11 | -6 | 0.16  | 0.51 |
| 3   | -11 | 6  | -0.06 | 0.40 |
| 3   | 11  | 6  | 0.06  | 0.36 |
| -3  | 11  | -6 | 0.16  | 0.40 |
| 3   | 11  | 6  | 0.11  | 0.42 |
| -4  | -11 | -6 | 1.10  | 0.56 |
| 4   | -11 | 6  | -0.01 | 0.43 |
| 4   | 11  | 6  | 0.55  | 0.47 |
| -4  | 11  | -6 | -0.01 | 0.42 |
| 4   | 11  | 6  | 0.43  | 0.35 |
| -5  | -11 | -6 | 1.51  | 0.57 |
| 5   | -11 | 6  | 0.28  | 0.45 |
| -5  | 11  | -6 | 0.65  | 0.47 |
| 5   | 11  | 6  | 0.89  | 0.43 |
| -6  | -11 | -6 | -0.39 | 0.55 |
| 6   | -11 | 6  | 0.31  | 0.49 |
| 6   | 11  | 6  | 0.13  | 0.41 |
| -6  | 11  | -6 | -0.24 | 0.46 |
| 7   | -11 | 6  | 0.04  | 0.54 |
| 10  | -12 | -6 | -0.35 | 0.54 |
| -10 | -12 | 6  | -0.41 | 0.43 |
| -9  | -12 | 6  | 0.81  | 0.49 |
| 9   | -12 | -6 | 0.35  | 0.56 |
| 9   | 12  | -6 | 1.98  | 0.60 |
| 8   | -12 | -6 | -0.45 | 0.50 |
| -8  | -12 | 6  | 0.07  | 0.50 |
| -8  | -12 | 6  | 0.16  | 0.43 |
| -8  | 12  | 6  | 0.21  | 0.48 |
| 8   | 12  | -6 | -0.24 | 0.47 |
| 7   | -12 | -6 | 1.06  | 0.54 |
| -7  | -12 | 6  | 1.29  | 0.47 |
| -7  | -12 | 6  | 1.95  | 0.52 |
| 7   | 12  | -6 | 0.95  | 0.54 |
| -7  | 12  | 6  | 2.06  | 0.51 |
| 6   | -12 | -6 | -0.30 | 0.46 |
| -6  | -12 | 6  | -0.02 | 0.43 |
| -6  | -12 | 6  | 0.00  | 0.39 |
| 6   | 12  | -6 | 0.09  | 0.45 |
| -6  | 12  | 6  | 0.03  | 0.44 |
| -5  | -12 | 6  | 3.67  | 0.60 |
| 5   | -12 | -6 | 2.56  | 0.58 |
| -5  | -12 | 6  | 1.95  | 0.47 |
| -5  | 12  | 6  | 2.14  | 0.50 |
| 5   | 12  | -6 | 2.01  | 0.49 |

-4 -12 6 0.72 0.42  
4 -12 -6 0.41 0.42  
4 -12 -6 -0.24 0.47  
-4 -12 6 0.27 0.44  
4 12 -6 0.30 0.38  
-4 12 6 0.84 0.41  
-3 -12 6 0.29 0.43  
3 -12 -6 -0.39 0.42  
3 -12 -6 0.54 0.43  
3 12 -6 0.52 0.36  
-3 12 6 0.64 0.44  
3 12 -6 0.28 0.41  
-2 -12 6 2.15 0.51  
2 -12 -6 1.00 0.49  
2 -12 -6 0.94 0.48  
2 12 -6 0.58 0.41  
-2 12 6 1.14 0.43  
2 12 -6 0.92 0.37  
-1 -12 6 1.50 0.48  
1 -12 -6 1.07 0.54  
1 12 -6 0.59 0.39  
1 12 -6 0.36 0.41  
-1 12 6 0.36 0.42  
0 -12 -6 0.26 0.46  
0 -12 6 0.39 0.43  
0 12 6 0.92 0.40  
0 12 -6 1.31 0.47  
0 12 -6 0.50 0.41  
1 -12 6 0.26 0.44  
-1 -12 -6 -0.70 0.49  
1 12 6 -0.03 0.36  
-1 12 -6 0.05 0.40  
2 -12 6 0.07 0.44  
-2 -12 -6 0.55 0.58  
-2 12 -6 0.15 0.41  
2 12 6 -0.13 0.33  
-3 -12 -6 0.58 0.59  
3 -12 6 1.00 0.44  
3 12 6 1.74 0.43  
-3 12 -6 1.28 0.46  
-4 -12 -6 -0.09 0.57  
4 -12 6 0.22 0.47  
-4 12 -6 0.07 0.45  
4 12 6 -0.26 0.41  
-5 -12 -6 -0.12 0.61  
5 -12 6 0.35 0.50

|    |     |    |       |      |
|----|-----|----|-------|------|
| 5  | 12  | 6  | -0.19 | 0.37 |
| -5 | 12  | -6 | 0.13  | 0.48 |
| 6  | 12  | 6  | 0.45  | 0.45 |
| 9  | -13 | -6 | -0.13 | 0.54 |
| -8 | -13 | 6  | 1.16  | 0.60 |
| 8  | -13 | -6 | -0.12 | 0.53 |
| -8 | -13 | 6  | -0.03 | 0.44 |
| 8  | 13  | -6 | 0.30  | 0.55 |
| -7 | -13 | 6  | -0.11 | 0.49 |
| 7  | -13 | -6 | -0.55 | 0.50 |
| -7 | -13 | 6  | 0.09  | 0.43 |
| -7 | 13  | 6  | 0.21  | 0.46 |
| 7  | 13  | -6 | -0.07 | 0.45 |
| 6  | -13 | -6 | -0.28 | 0.55 |
| -6 | -13 | 6  | 0.90  | 0.53 |
| -6 | -13 | 6  | 0.36  | 0.43 |
| -6 | 13  | 6  | 0.47  | 0.45 |
| 6  | 13  | -6 | 1.02  | 0.48 |
| -5 | -13 | 6  | 0.97  | 0.53 |
| -5 | -13 | 6  | 0.10  | 0.42 |
| -5 | 13  | 6  | 0.50  | 0.49 |
| 5  | 13  | -6 | 0.27  | 0.50 |
| 4  | -13 | -6 | 1.71  | 0.52 |
| -4 | -13 | 6  | 1.86  | 0.57 |
| -4 | 13  | 6  | 1.79  | 0.50 |
| 4  | 13  | -6 | 1.29  | 0.51 |
| 3  | -13 | -6 | 0.20  | 0.45 |
| -3 | -13 | 6  | 0.40  | 0.44 |
| -3 | 13  | 6  | 0.39  | 0.43 |
| 3  | 13  | -6 | -0.49 | 0.42 |
| 3  | 13  | -6 | 0.52  | 0.45 |
| 2  | -13 | -6 | 1.21  | 0.56 |
| -2 | -13 | 6  | 0.76  | 0.49 |
| 2  | 13  | -6 | 0.65  | 0.47 |
| -2 | 13  | 6  | 0.55  | 0.43 |
| 2  | 13  | -6 | 0.77  | 0.46 |
| -1 | -13 | 6  | 0.65  | 0.43 |
| 1  | -13 | -6 | 0.67  | 0.55 |
| 1  | 13  | -6 | 0.14  | 0.40 |
| -1 | 13  | 6  | 0.13  | 0.46 |
| 1  | 13  | -6 | 0.50  | 0.45 |
| 0  | -13 | 6  | -0.09 | 0.38 |
| 0  | -13 | -6 | 0.21  | 0.55 |
| 0  | 13  | 6  | 0.05  | 0.42 |
| 0  | 13  | -6 | 0.08  | 0.38 |
| 1  | -13 | 6  | 1.17  | 0.52 |



-1 -13 -6 0.10 0.57  
1 13 6 2.08 0.54  
-1 13 -6 0.25 0.45  
2 -13 6 1.35 0.49  
-2 -13 -6 1.83 0.68  
2 13 6 1.39 0.51  
-2 13 -6 1.41 0.51  
-3 -13 -6 0.23 0.66  
3 -13 6 0.68 0.45  
-3 13 -6 -0.22 0.42  
3 13 6 0.71 0.47  
-4 -13 -6 -0.53 0.64  
4 -13 6 0.84 0.54  
4 13 6 0.29 0.39  
-4 13 -6 0.10 0.48  
5 13 6 0.58 0.46  
-7 -14 6 0.38 0.54  
-7 14 6 0.28 0.45  
-6 -14 6 0.84 0.52  
-6 -14 6 -0.02 0.41  
6 14 -6 0.11 0.47  
-6 14 6 0.00 0.43  
-5 -14 6 0.28 0.50  
-5 14 6 0.19 0.44  
5 14 -6 -0.53 0.44  
-4 -14 6 -0.15 0.50  
4 -14 -6 0.70 0.50  
-4 14 6 0.00 0.48  
4 14 -6 -0.45 0.42  
4 14 -6 -0.37 0.42  
3 -14 -6 0.02 0.49  
-3 -14 6 -0.24 0.44  
3 14 -6 0.05 0.41  
3 14 -6 -0.10 0.41  
-3 14 6 -0.26 0.42  
2 -14 -6 0.43 0.53  
-2 -14 6 0.25 0.50  
-2 14 6 0.24 0.45  
2 14 -6 0.05 0.45  
2 14 -6 -0.07 0.41  
-1 -14 6 0.29 0.45  
1 -14 -6 0.98 0.57  
1 14 -6 0.65 0.47  
1 14 -6 -0.02 0.46  
-1 14 6 0.72 0.47  
0 -14 -6 1.01 0.55

|     |     |    |       |      |
|-----|-----|----|-------|------|
| 0   | -14 | 6  | 1.42  | 0.55 |
| 0   | 14  | -6 | 0.79  | 0.49 |
| 0   | 14  | 6  | 0.82  | 0.53 |
| 1   | -14 | 6  | 0.71  | 0.52 |
| -1  | -14 | -6 | -0.78 | 0.57 |
| 1   | 14  | 6  | 0.47  | 0.47 |
| -1  | 14  | -6 | 0.43  | 0.48 |
| -2  | -14 | -6 | 0.03  | 0.62 |
| 2   | -14 | 6  | 0.53  | 0.48 |
| -2  | 14  | -6 | 0.22  | 0.48 |
| 2   | 14  | 6  | -0.02 | 0.49 |
| -3  | 14  | -6 | 0.04  | 0.46 |
| 3   | 14  | 6  | 0.38  | 0.55 |
| -5  | -15 | 6  | -0.59 | 0.81 |
| -5  | 15  | 6  | -0.17 | 0.51 |
| -4  | -15 | 6  | 0.50  | 0.55 |
| -4  | 15  | 6  | 0.39  | 0.55 |
| 4   | 15  | -6 | 0.09  | 0.47 |
| 4   | 15  | -6 | 0.52  | 0.49 |
| 3   | -15 | -6 | 0.29  | 0.53 |
| -3  | -15 | 6  | 0.63  | 0.48 |
| 3   | 15  | -6 | -0.19 | 0.45 |
| 3   | 15  | -6 | -0.32 | 0.45 |
| -3  | 15  | 6  | 0.19  | 0.50 |
| -2  | -15 | 6  | 0.11  | 0.53 |
| 2   | -15 | -6 | -0.13 | 0.54 |
| -2  | 15  | 6  | 0.01  | 0.52 |
| 2   | 15  | -6 | 0.20  | 0.45 |
| 2   | 15  | -6 | -0.52 | 0.46 |
| 1   | -15 | -6 | 0.44  | 0.54 |
| -1  | -15 | 6  | 0.60  | 0.61 |
| -1  | 15  | 6  | 0.07  | 0.51 |
| 1   | 15  | -6 | -0.03 | 0.48 |
| 0   | -15 | -6 | -0.90 | 0.54 |
| 0   | 15  | -6 | -0.01 | 0.48 |
| -1  | 15  | -6 | 0.57  | 0.51 |
| -14 | 0   | 7  | 0.16  | 0.50 |
| 14  | 0   | -7 | 0.99  | 0.52 |
| -13 | 0   | 7  | 0.50  | 0.42 |
| 13  | 0   | -7 | 0.02  | 0.47 |
| -12 | 0   | 7  | 6.98  | 0.66 |
| 12  | 0   | -7 | 8.42  | 0.66 |
| 12  | 0   | -7 | 7.26  | 0.72 |
| 11  | 0   | -7 | 0.46  | 0.35 |
| -11 | 0   | 7  | 0.23  | 0.39 |
| 11  | 0   | -7 | 0.93  | 0.43 |

-10 0 7 7.04 0.63  
10 0 -7 6.70 0.63  
10 0 -7 5.73 0.51  
-9 0 7 0.50 0.36  
9 0 -7 0.12 0.36  
-8 0 7 20.95 0.81  
-8 0 7 22.99 0.92  
8 0 -7 21.33 0.91  
7 0 -7 5.69 0.54  
-7 0 7 5.59 0.59  
-7 0 7 5.62 0.45  
-7 0 7 6.26 0.50  
7 0 -7 6.44 0.63  
6 0 -7 0.97 0.39  
-6 0 7 0.76 0.37  
-6 0 7 0.59 0.28  
6 0 -7 1.12 0.37  
-6 0 7 0.69 0.25  
-5 0 7 -0.24 0.30  
-5 0 7 0.20 0.13  
-5 0 7 0.08 0.24  
5 0 -7 -0.08 0.31  
-5 0 7 0.04 0.21  
5 0 -7 0.14 0.31  
5 0 -7 0.07 0.10  
-4 0 7 0.55 0.28  
4 0 -7 0.82 0.31  
4 0 -7 0.53 0.30  
-4 0 7 0.73 0.26  
-4 0 7 0.64 0.24  
-3 0 7 1.66 0.22  
-3 0 7 1.34 0.23  
3 0 -7 1.15 0.31  
-3 0 7 1.24 0.30  
3 0 -7 1.47 0.31  
-3 0 7 1.55 0.26  
2 0 -7 0.30 0.26  
2 0 -7 0.28 0.24  
-2 0 7 0.48 0.18  
-2 0 7 1.02 0.28  
1 0 -7 2.33 0.35  
-1 0 7 2.43 0.33  
1 0 -7 3.46 0.40  
-1 0 7 2.90 0.29  
-1 0 7 2.65 0.26  
-1 0 7 3.41 0.34

0 0 -7 1.10 0.33  
0 0 -7 1.45 0.23  
0 0 7 0.95 0.20  
0 0 7 1.20 0.30  
0 0 7 1.28 0.33  
0 0 -7 0.95 0.29  
-1 0 -7 3.26 0.31  
1 0 7 3.12 0.37  
-1 0 -7 1.96 0.38  
1 0 7 3.84 0.27  
1 0 7 3.38 0.43  
1 0 7 3.03 0.44  
2 0 7 5.63 0.51  
-2 0 -7 7.00 0.61  
2 0 7 5.07 0.53  
-2 0 -7 5.68 0.38  
2 0 7 5.83 0.31  
-3 0 -7 1.03 0.30  
3 0 7 1.37 0.41  
3 0 7 1.29 0.43  
-3 0 -7 0.99 0.27  
-4 0 -7 8.01 0.58  
-4 0 -7 6.54 0.48  
4 0 7 7.76 0.65  
4 0 7 7.10 0.60  
-5 0 -7 4.69 0.51  
5 0 7 4.22 0.50  
-5 0 -7 4.20 0.42  
5 0 7 3.61 0.53  
-6 0 -7 2.00 0.43  
6 0 7 1.39 0.47  
6 0 7 1.53 0.46  
-6 0 -7 2.14 0.37  
7 0 7 0.41 0.36  
-7 0 -7 0.06 0.30  
-7 0 -7 -0.20 0.31  
8 0 7 0.72 0.45  
-8 0 -7 0.48 0.43  
9 0 7 0.05 0.43  
-9 0 -7 -0.13 0.44  
-10 0 -7 0.47 0.52  
-14 -1 7 0.20 0.44  
14 -1 -7 0.63 0.52  
-14 1 7 0.07 0.49  
14 1 -7 1.03 0.52  
-13 -1 7 -0.01 0.46

|     |    |    |       |      |
|-----|----|----|-------|------|
| 13  | -1 | -7 | 0.66  | 0.48 |
| -13 | 1  | 7  | -0.29 | 0.43 |
| 13  | 1  | -7 | 0.52  | 0.47 |
| -12 | -1 | 7  | -0.28 | 0.35 |
| 12  | -1 | -7 | 0.07  | 0.43 |
| 12  | -1 | -7 | 0.05  | 0.36 |
| 12  | 1  | -7 | 0.18  | 0.39 |
| 12  | 1  | -7 | 0.02  | 0.37 |
| -12 | 1  | 7  | 0.66  | 0.39 |
| -11 | -1 | 7  | 3.30  | 0.52 |
| 11  | -1 | -7 | 3.05  | 0.42 |
| 11  | -1 | -7 | 3.29  | 0.54 |
| -11 | 1  | 7  | 2.98  | 0.51 |
| 11  | 1  | -7 | 3.80  | 0.55 |
| 11  | 1  | -7 | 3.85  | 0.49 |
| -10 | -1 | 7  | 0.08  | 0.38 |
| 10  | -1 | -7 | 0.01  | 0.39 |
| 10  | 1  | -7 | 0.46  | 0.35 |
| 10  | 1  | -7 | 0.19  | 0.39 |
| -10 | 1  | 7  | 0.76  | 0.39 |
| -9  | -1 | 7  | 6.55  | 0.58 |
| 9   | -1 | -7 | 7.37  | 0.62 |
| -9  | 1  | 7  | 6.62  | 0.56 |
| 9   | 1  | -7 | 8.01  | 0.62 |
| -9  | 1  | 7  | 8.15  | 0.56 |
| 9   | 1  | -7 | 8.95  | 0.56 |
| -8  | -1 | 7  | 0.04  | 0.37 |
| -8  | -1 | 7  | -0.16 | 0.31 |
| 8   | -1 | -7 | 0.46  | 0.38 |
| -8  | 1  | 7  | 0.43  | 0.31 |
| -8  | 1  | 7  | 0.49  | 0.27 |
| 8   | 1  | -7 | 0.52  | 0.36 |
| 8   | 1  | -7 | 0.18  | 0.28 |
| -7  | -1 | 7  | 12.94 | 0.83 |
| -7  | -1 | 7  | 12.85 | 0.60 |
| 7   | -1 | -7 | 12.23 | 1.00 |
| 7   | -1 | -7 | 14.05 | 0.77 |
| -7  | -1 | 7  | 15.08 | 0.73 |
| 7   | 1  | -7 | 15.18 | 0.71 |
| -7  | 1  | 7  | 14.07 | 0.63 |
| -7  | 1  | 7  | 14.26 | 0.87 |
| 7   | 1  | -7 | 13.60 | 0.79 |
| -7  | 1  | 7  | 13.45 | 0.69 |
| 6   | -1 | -7 | 3.40  | 0.49 |
| -6  | -1 | 7  | 3.94  | 0.48 |
| -6  | -1 | 7  | 2.91  | 0.34 |

6 -1 -7 2.63 0.48  
-6 -1 7 2.53 0.37  
-6 1 7 2.45 0.36  
-6 1 7 2.63 0.33  
6 1 -7 3.49 0.42  
6 1 -7 3.26 0.46  
-6 1 7 4.09 0.53  
-5 -1 7 3.71 0.24  
5 -1 -7 4.28 0.51  
5 -1 -7 4.02 0.45  
-5 -1 7 3.70 0.35  
-5 -1 7 4.15 0.41  
-5 -1 7 3.69 0.44  
5 -1 -7 3.59 0.19  
5 1 -7 4.18 0.44  
-5 1 7 4.30 0.39  
5 1 -7 3.84 0.48  
-5 1 7 3.31 0.36  
-5 1 7 4.04 0.49  
-4 -1 7 1.58 0.32  
-4 -1 7 1.56 0.20  
4 -1 -7 0.98 0.30  
-4 -1 7 1.78 0.32  
4 -1 -7 1.17 0.34  
-4 -1 7 1.42 0.27  
4 -1 -7 1.43 0.16  
4 1 -7 1.14 0.31  
4 1 -7 1.15 0.30  
-4 1 7 1.33 0.25  
-4 1 7 1.51 0.42  
-4 1 7 1.79 0.35  
-3 -1 7 15.22 0.58  
3 -1 -7 16.25 0.50  
3 -1 -7 15.06 0.76  
3 -1 -7 15.76 0.69  
-3 -1 7 16.20 0.69  
-3 -1 7 15.22 0.56  
-3 -1 7 15.14 0.52  
-3 1 7 15.43 0.55  
3 1 -7 15.10 0.70  
-3 1 7 15.31 0.73  
-3 1 7 15.86 0.57  
3 1 -7 14.87 0.62  
2 -1 -7 8.29 0.58  
-2 -1 7 8.83 0.47  
-2 -1 7 8.20 0.47

-2 -1 7 8.79 0.39  
2 -1 -7 9.05 0.58  
2 -1 -7 8.84 0.39  
-2 1 7 8.82 0.40  
-2 1 7 9.16 0.53  
-2 1 7 8.21 0.43  
-2 1 7 9.04 0.41  
2 1 -7 8.51 0.52  
2 1 -7 8.81 0.54  
1 -1 -7 1.90 0.34  
1 -1 -7 1.71 0.36  
-1 -1 7 2.23 0.32  
-1 -1 7 1.75 0.28  
1 -1 -7 2.45 0.28  
-1 -1 7 1.70 0.28  
-1 1 7 1.90 0.25  
1 1 -7 1.90 0.33  
1 1 -7 1.44 0.29  
-1 1 7 2.51 0.35  
-1 1 7 2.05 0.34  
-1 1 7 2.14 0.25  
0 -1 -7 15.04 0.60  
0 -1 7 15.57 0.68  
0 -1 -7 15.44 0.51  
0 -1 -7 16.37 0.77  
0 -1 -7 15.67 0.79  
0 -1 7 14.88 0.61  
0 -1 7 16.77 0.50  
0 1 7 15.12 0.69  
0 1 -7 16.40 0.74  
0 1 -7 14.40 0.57  
0 1 7 15.75 0.65  
1 -1 7 4.27 0.41  
-1 -1 -7 4.61 0.30  
-1 -1 -7 4.66 0.40  
1 -1 7 4.77 0.46  
1 -1 7 3.68 0.47  
1 -1 7 4.47 0.28  
-1 -1 -7 3.89 0.46  
1 1 7 4.07 0.50  
-1 1 -7 4.10 0.45  
1 1 7 4.63 0.47  
1 1 7 4.69 0.48  
-1 1 -7 3.10 0.34  
1 1 7 4.23 0.31  
2 -1 7 0.84 0.32

2 -1 7 0.63 0.16  
2 -1 7 0.58 0.33  
2 -1 7 0.87 0.32  
-2 -1 -7 0.48 0.19  
-2 -1 -7 0.68 0.30  
-2 -1 -7 0.83 0.34  
2 1 7 0.23 0.35  
2 1 7 0.58 0.36  
2 1 7 0.91 0.20  
-2 1 -7 0.56 0.23  
2 1 7 0.68 0.38  
-2 1 -7 0.62 0.34  
-3 -1 -7 0.83 0.23  
-3 -1 -7 1.15 0.32  
3 -1 7 1.20 0.36  
3 -1 7 0.35 0.36  
-3 1 -7 0.63 0.27  
3 1 7 1.09 0.40  
3 1 7 0.81 0.20  
3 1 7 0.87 0.39  
4 -1 7 10.74 0.70  
-4 -1 -7 11.40 0.53  
-4 -1 -7 11.31 0.64  
-4 1 -7 10.01 0.57  
4 1 7 11.96 0.73  
5 -1 7 2.66 0.46  
5 -1 7 1.93 0.46  
-5 -1 -7 1.86 0.31  
-5 -1 -7 2.03 0.38  
-5 1 -7 2.54 0.39  
5 1 7 1.77 0.42  
-5 1 -7 2.28 0.36  
6 -1 7 1.22 0.43  
-6 -1 -7 1.16 0.36  
-6 -1 -7 0.48 0.27  
6 -1 7 1.17 0.45  
-6 1 -7 1.10 0.34  
6 1 7 1.51 0.40  
-6 1 -7 1.00 0.34  
7 -1 7 0.63 0.41  
7 -1 7 1.13 0.47  
-7 -1 -7 0.25 0.33  
-7 1 -7 1.44 0.41  
-7 1 -7 0.71 0.36  
7 1 7 1.78 0.44  
-8 -1 -7 -0.04 0.34



8 -1 7 0.56 0.43  
-8 1 -7 0.14 0.35  
-8 1 -7 -0.33 0.38  
8 1 7 0.79 0.45  
-9 -1 -7 0.03 0.45  
9 -1 7 0.59 0.49  
-9 1 -7 -0.38 0.38  
9 1 7 0.66 0.45  
-10 -1 -7 -0.04 0.46  
-10 1 -7 0.23 0.51  
14 -2 -7 0.35 0.53  
-14 -2 7 0.59 0.48  
-14 2 7 0.63 0.51  
14 2 -7 0.33 0.46  
13 -2 -7 0.13 0.49  
-13 -2 7 -0.10 0.40  
-13 2 7 0.31 0.47  
13 2 -7 0.30 0.45  
13 2 -7 0.26 0.43  
12 -2 -7 1.03 0.39  
-12 -2 7 0.61 0.46  
12 -2 -7 0.11 0.47  
12 2 -7 0.42 0.40  
12 2 -7 0.43 0.42  
-12 2 7 0.14 0.40  
11 -2 -7 -0.13 0.41  
-11 -2 7 -0.39 0.37  
11 2 -7 0.20 0.31  
-11 2 7 0.15 0.37  
11 2 -7 0.00 0.37  
-10 -2 7 0.76 0.37  
10 -2 -7 0.25 0.40  
10 2 -7 0.09 0.29  
-10 2 7 -0.01 0.34  
-10 2 7 0.07 0.27  
10 2 -7 0.19 0.36  
9 -2 -7 1.48 0.44  
-9 -2 7 1.87 0.40  
9 2 -7 1.28 0.38  
9 2 -7 0.94 0.35  
-9 2 7 1.86 0.33  
-9 2 7 1.55 0.38  
-8 -2 7 1.82 0.39  
-8 -2 7 2.54 0.49  
8 -2 -7 2.40 0.49  
8 2 -7 2.39 0.41

|    |    |    |       |      |
|----|----|----|-------|------|
| 8  | 2  | -7 | 2.16  | 0.38 |
| 8  | 2  | -7 | 2.31  | 0.45 |
| -8 | 2  | 7  | 2.94  | 0.40 |
| -8 | 2  | 7  | 1.42  | 0.38 |
| -7 | -2 | 7  | 4.19  | 0.52 |
| -7 | -2 | 7  | 3.58  | 0.48 |
| 7  | -2 | -7 | 3.61  | 0.49 |
| -7 | 2  | 7  | 3.51  | 0.43 |
| -7 | 2  | 7  | 4.28  | 0.40 |
| 7  | 2  | -7 | 4.35  | 0.46 |
| 7  | 2  | -7 | 4.32  | 0.42 |
| 7  | 2  | -7 | 4.79  | 0.52 |
| -6 | -2 | 7  | 4.48  | 0.44 |
| 6  | -2 | -7 | 3.50  | 0.51 |
| -6 | -2 | 7  | 4.20  | 0.48 |
| -6 | -2 | 7  | 4.35  | 0.26 |
| 6  | -2 | -7 | 4.38  | 0.48 |
| -6 | 2  | 7  | 5.22  | 0.59 |
| -6 | 2  | 7  | 3.99  | 0.38 |
| 6  | 2  | -7 | 4.43  | 0.43 |
| 6  | 2  | -7 | 4.77  | 0.42 |
| 6  | 2  | -7 | 5.59  | 0.52 |
| -6 | 2  | 7  | 4.65  | 0.42 |
| -5 | -2 | 7  | 4.85  | 0.46 |
| 5  | -2 | -7 | 5.62  | 0.53 |
| 5  | -2 | -7 | 4.45  | 0.24 |
| -5 | -2 | 7  | 5.00  | 0.46 |
| 5  | -2 | -7 | 3.88  | 0.53 |
| -5 | -2 | 7  | 5.04  | 0.30 |
| -5 | 2  | 7  | 4.60  | 0.38 |
| -5 | 2  | 7  | 5.37  | 0.40 |
| -5 | 2  | 7  | 5.02  | 0.53 |
| 5  | 2  | -7 | 4.75  | 0.48 |
| 5  | 2  | -7 | 4.15  | 0.41 |
| -4 | -2 | 7  | 18.87 | 0.76 |
| 4  | -2 | -7 | 19.21 | 0.54 |
| 4  | -2 | -7 | 21.02 | 0.93 |
| -4 | -2 | 7  | 19.22 | 0.57 |
| 4  | -2 | -7 | 18.08 | 0.77 |
| -4 | -2 | 7  | 19.56 | 0.74 |
| -4 | 2  | 7  | 19.09 | 0.86 |
| 4  | 2  | -7 | 18.70 | 0.69 |
| -4 | 2  | 7  | 18.11 | 0.62 |
| 4  | 2  | -7 | 17.72 | 0.78 |
| -4 | 2  | 7  | 18.90 | 0.64 |
| 3  | -2 | -7 | -0.11 | 0.30 |

-3 -2 7 0.02 0.21  
-3 -2 7 0.13 0.20  
3 -2 -7 -0.10 0.29  
3 -2 -7 0.23 0.16  
-3 -2 7 0.26 0.26  
-3 2 7 -0.16 0.19  
3 2 -7 0.16 0.24  
3 2 -7 0.14 0.24  
3 2 -7 0.07 0.22  
-3 2 7 0.05 0.25  
-3 2 7 0.23 0.19  
-2 -2 7 4.42 0.37  
-2 -2 7 4.29 0.34  
-2 -2 7 3.95 0.30  
2 -2 -7 3.61 0.30  
-2 -2 7 4.12 0.36  
2 -2 -7 4.04 0.44  
2 -2 -7 3.12 0.42  
2 2 -7 3.69 0.38  
2 2 -7 3.35 0.35  
-2 2 7 3.77 0.41  
-2 2 7 4.13 0.34  
-2 2 7 4.06 0.30  
1 -2 -7 1.55 0.34  
-1 -2 7 1.92 0.31  
-1 -2 7 1.53 0.27  
1 -2 -7 2.24 0.28  
1 -2 -7 1.64 0.34  
1 2 -7 1.79 0.31  
-1 2 7 2.20 0.22  
-1 2 7 2.33 0.26  
1 2 -7 2.28 0.33  
-1 2 7 2.13 0.37  
0 -2 7 1.77 0.21  
0 -2 -7 1.12 0.27  
0 -2 -7 1.55 0.35  
0 -2 -7 1.58 0.18  
0 -2 7 1.78 0.35  
0 -2 7 2.05 0.33  
0 -2 -7 0.73 0.34  
0 -2 7 2.14 0.35  
0 2 -7 1.69 0.32  
0 2 7 1.83 0.38  
0 2 -7 1.39 0.28  
0 2 7 1.32 0.24  
1 -2 7 7.09 0.50

-1 -2 -7 6.28 0.44  
1 -2 7 7.04 0.51  
-1 -2 -7 6.57 0.31  
1 -2 7 6.68 0.54  
-1 -2 -7 6.37 0.56  
1 -2 7 5.56 0.30  
-1 2 -7 6.73 0.46  
1 2 7 6.46 0.39  
1 2 7 7.62 0.57  
-1 2 -7 6.82 0.54  
2 -2 7 4.78 0.48  
-2 -2 -7 4.32 0.45  
2 -2 7 4.37 0.50  
-2 -2 -7 4.86 0.30  
2 -2 7 5.03 0.47  
-2 -2 -7 4.45 0.54  
2 2 7 4.79 0.33  
-2 2 -7 3.97 0.25  
2 2 7 4.92 0.49  
-2 2 -7 5.24 0.53  
-2 2 -7 4.51 0.40  
-3 -2 -7 1.50 0.24  
-3 -2 -7 0.59 0.30  
3 -2 7 1.06 0.37  
3 -2 7 1.98 0.42  
-3 2 -7 1.47 0.32  
3 2 7 1.63 0.45  
-3 2 -7 1.63 0.43  
3 2 7 1.90 0.24  
4 -2 7 -0.56 0.32  
-4 -2 -7 0.22 0.21  
-4 -2 -7 0.15 0.32  
4 -2 7 0.35 0.32  
4 2 7 0.30 0.38  
-4 2 -7 0.49 0.28  
5 -2 7 3.49 0.47  
5 -2 7 3.47 0.51  
-5 -2 -7 3.42 0.46  
-5 2 -7 5.10 0.49  
5 2 7 3.97 0.51  
-6 -2 -7 2.96 0.46  
6 -2 7 3.37 0.50  
6 -2 7 2.49 0.52  
-6 2 -7 3.05 0.43  
6 2 7 2.76 0.46  
-6 2 -7 2.89 0.44

7 -2 7 0.70 0.50  
7 -2 7 0.52 0.39  
-7 -2 -7 0.68 0.36  
-7 2 -7 0.62 0.35  
7 2 7 0.47 0.38  
-7 2 -7 0.60 0.34  
8 -2 7 0.12 0.54  
-8 -2 -7 -0.17 0.39  
8 -2 7 0.20 0.38  
8 2 7 -0.27 0.41  
-8 2 -7 -0.56 0.34  
-8 2 -7 -0.09 0.38  
9 -2 7 0.03 0.46  
-9 -2 -7 -0.14 0.44  
-9 2 -7 -0.31 0.38  
9 2 7 -0.32 0.42  
-9 2 -7 -0.20 0.45  
-10 -2 -7 -0.01 0.51  
-10 2 -7 -0.40 0.47  
14 -3 -7 0.57 0.56  
-14 -3 7 0.38 0.46  
-14 3 7 0.31 0.50  
13 -3 -7 0.18 0.49  
-13 -3 7 0.37 0.49  
13 3 -7 -0.40 0.41  
13 3 -7 0.10 0.46  
-13 3 7 -0.04 0.44  
12 -3 -7 1.11 0.53  
-12 -3 7 0.33 0.44  
12 3 -7 0.86 0.43  
12 3 -7 0.62 0.43  
-12 3 7 0.31 0.41  
-11 -3 7 2.24 0.50  
11 -3 -7 1.83 0.50  
11 3 -7 2.29 0.46  
-11 3 7 1.82 0.45  
11 3 -7 1.39 0.41  
-11 3 7 1.74 0.39  
10 -3 -7 0.33 0.38  
-10 -3 7 0.15 0.39  
10 3 -7 0.51 0.37  
-10 3 7 0.50 0.37  
-10 3 7 -0.06 0.26  
10 3 -7 1.23 0.38  
-9 -3 7 5.95 0.77  
9 -3 -7 6.63 0.67

-9 -3 7 5.99 0.56  
9 3 -7 7.42 0.56  
9 3 -7 6.63 0.55  
-9 3 7 6.69 0.54  
-9 3 7 6.72 0.54  
-8 -3 7 2.96 0.50  
8 -3 -7 3.05 0.47  
-8 -3 7 2.87 0.48  
-8 3 7 3.64 0.44  
8 3 -7 3.34 0.42  
8 3 -7 3.30 0.46  
8 3 -7 2.95 0.39  
-8 3 7 3.82 0.42  
-7 -3 7 8.76 0.66  
7 -3 -7 9.20 0.67  
-7 -3 7 8.82 0.65  
-7 3 7 8.43 0.56  
-7 3 7 8.29 0.52  
7 3 -7 8.82 0.54  
7 3 -7 8.18 0.64  
7 3 -7 8.91 0.55  
-6 -3 7 12.27 0.65  
6 -3 -7 15.18 0.80  
-6 -3 7 12.85 0.47  
-6 -3 7 12.65 0.69  
6 3 -7 13.77 0.63  
-6 3 7 14.46 0.89  
6 3 -7 12.78 0.69  
-6 3 7 13.59 0.61  
6 3 -7 13.80 0.61  
-6 3 7 13.83 0.59  
5 -3 -7 7.43 0.66  
5 -3 -7 7.13 0.34  
-5 -3 7 8.59 0.54  
-5 -3 7 7.78 0.56  
5 -3 -7 7.78 0.58  
-5 -3 7 7.33 0.38  
5 3 -7 7.05 0.48  
5 3 -7 7.48 0.57  
5 3 -7 7.23 0.49  
-5 3 7 7.59 0.49  
-5 3 7 9.01 0.70  
4 -3 -7 0.05 0.33  
-4 -3 7 -0.05 0.19  
-4 -3 7 -0.21 0.30  
4 -3 -7 -0.17 0.16

4 -3 -7 0.50 0.35  
-4 -3 7 -0.19 0.21  
4 3 -7 -0.08 0.24  
4 3 -7 0.29 0.26  
-4 3 7 -0.16 0.20  
-4 3 7 -0.19 0.27  
4 3 -7 -0.35 0.22  
-4 3 7 -0.17 0.22  
-3 -3 7 10.42 0.55  
3 -3 -7 11.49 0.65  
3 -3 -7 11.08 0.45  
3 -3 -7 10.84 0.74  
3 3 -7 10.06 0.56  
-3 3 7 10.33 0.49  
3 3 -7 10.40 0.48  
3 3 -7 10.39 0.54  
-3 3 7 10.61 0.42  
3 3 -7 9.43 0.48  
-2 -3 7 7.74 0.49  
-2 -3 7 7.57 0.44  
2 -3 -7 8.01 0.63  
-2 -3 7 7.72 0.45  
2 -3 -7 7.88 0.40  
2 3 -7 7.64 0.43  
2 3 -7 7.99 0.50  
-2 3 7 7.87 0.45  
-2 3 7 7.55 0.33  
-2 3 7 8.51 0.53  
2 3 -7 7.89 0.48  
-1 -3 7 6.63 0.44  
1 -3 -7 6.65 0.55  
-1 -3 7 7.82 0.46  
-1 -3 7 7.12 0.47  
1 -3 -7 7.15 0.56  
1 -3 -7 7.27 0.43  
-1 3 7 7.76 0.30  
1 3 -7 6.81 0.48  
-1 3 7 8.32 0.41  
-1 3 7 7.88 0.53  
1 3 -7 7.41 0.38  
1 3 -7 7.49 0.50  
0 -3 7 2.33 0.33  
0 -3 7 2.19 0.33  
0 -3 -7 1.36 0.33  
0 -3 -7 2.32 0.42  
0 -3 7 2.17 0.36

|    |    |    |       |      |
|----|----|----|-------|------|
| 0  | -3 | -7 | 2.82  | 0.34 |
| 0  | -3 | -7 | 2.21  | 0.16 |
| 0  | 3  | -7 | 2.31  | 0.23 |
| 0  | 3  | -7 | 2.12  | 0.33 |
| 0  | 3  | -7 | 1.42  | 0.29 |
| 0  | 3  | 7  | 2.08  | 0.36 |
| 0  | 3  | 7  | 2.12  | 0.27 |
| -1 | -3 | -7 | 12.94 | 0.59 |
| -1 | -3 | -7 | 13.00 | 0.80 |
| -1 | -3 | -7 | 13.87 | 0.78 |
| 1  | -3 | 7  | 13.13 | 0.63 |
| 1  | -3 | 7  | 12.20 | 0.92 |
| -1 | -3 | -7 | 13.06 | 0.38 |
| 1  | -3 | 7  | 13.95 | 0.92 |
| -1 | 3  | -7 | 13.70 | 0.71 |
| -1 | 3  | -7 | 12.86 | 0.43 |
| 1  | 3  | 7  | 12.09 | 0.70 |
| -1 | 3  | -7 | 12.92 | 0.61 |
| 2  | -3 | 7  | 4.90  | 0.49 |
| -2 | -3 | -7 | 2.95  | 0.38 |
| 2  | -3 | 7  | 4.46  | 0.46 |
| 2  | -3 | 7  | 3.14  | 0.45 |
| -2 | 3  | -7 | 4.80  | 0.46 |
| 2  | 3  | 7  | 4.14  | 0.33 |
| 2  | 3  | 7  | 4.48  | 0.51 |
| -2 | 3  | -7 | 3.84  | 0.47 |
| 3  | -3 | 7  | 9.19  | 0.59 |
| 3  | -3 | 7  | 8.29  | 0.61 |
| -3 | -3 | -7 | 8.66  | 0.60 |
| 3  | 3  | 7  | 8.69  | 0.66 |
| -3 | 3  | -7 | 7.51  | 0.62 |
| -3 | 3  | -7 | 8.06  | 0.52 |
| 3  | 3  | 7  | 8.42  | 0.44 |
| 4  | -3 | 7  | 4.20  | 0.50 |
| 4  | -3 | 7  | 2.73  | 0.42 |
| -4 | -3 | -7 | 2.93  | 0.41 |
| -4 | 3  | -7 | 4.44  | 0.46 |
| 4  | 3  | 7  | 3.08  | 0.48 |
| 5  | -3 | 7  | 5.63  | 0.57 |
| -5 | -3 | -7 | 5.15  | 0.52 |
| 5  | -3 | 7  | 6.41  | 0.61 |
| -5 | 3  | -7 | 5.62  | 0.53 |
| 5  | 3  | 7  | 6.01  | 0.61 |
| -6 | -3 | -7 | 0.77  | 0.34 |
| 6  | -3 | 7  | 0.88  | 0.39 |
| 6  | -3 | 7  | 0.12  | 0.38 |



-6 3 -7 0.86 0.36  
6 3 7 0.22 0.41  
7 -3 7 0.21 0.38  
-7 -3 -7 -0.14 0.31  
-7 3 -7 -0.06 0.34  
7 3 7 0.15 0.42  
-8 -3 -7 0.58 0.41  
8 -3 7 0.61 0.46  
8 -3 7 1.39 0.53  
-8 3 -7 0.54 0.41  
8 3 7 0.39 0.41  
-8 3 -7 0.93 0.44  
9 -3 7 1.13 0.61  
9 -3 7 0.94 0.52  
-9 -3 -7 0.53 0.49  
9 3 7 1.40 0.54  
-9 3 -7 2.30 0.56  
-9 3 -7 0.63 0.45  
-10 -3 -7 -0.49 0.42  
-10 3 -7 -0.35 0.47  
-10 3 -7 0.05 0.49  
-14 -4 7 0.33 0.79  
-14 4 7 -0.08 0.72  
-13 -4 7 0.44 0.49  
13 -4 -7 0.52 0.54  
-13 4 7 -0.91 0.41  
13 4 -7 0.48 0.45  
-12 -4 7 0.90 0.49  
12 -4 -7 0.03 0.47  
-12 4 7 0.80 0.45  
12 4 -7 0.17 0.37  
11 -4 -7 0.49 0.48  
-11 -4 7 0.09 0.36  
-11 4 7 -0.39 0.31  
11 4 -7 -0.20 0.30  
-11 4 7 -0.29 0.34  
10 -4 -7 1.83 0.45  
-10 -4 7 2.55 0.51  
-10 4 7 3.52 0.45  
10 4 -7 2.12 0.44  
10 4 -7 2.91 0.44  
-10 4 7 2.40 0.45  
-9 -4 7 2.24 0.43  
9 -4 -7 2.57 0.49  
-9 4 7 2.16 0.40  
9 4 -7 1.56 0.39

9 4 -7 2.47 0.39  
-9 4 7 2.32 0.39  
8 -4 -7 10.65 0.77  
-8 -4 7 11.16 0.71  
-8 4 7 9.95 0.57  
8 4 -7 10.96 0.62  
8 4 -7 9.29 0.56  
-8 4 7 9.76 0.60  
-7 -4 7 3.60 0.45  
7 -4 -7 2.76 0.47  
-7 -4 7 3.62 0.46  
7 4 -7 3.86 0.43  
7 4 -7 3.44 0.42  
7 4 -7 3.37 0.37  
-7 4 7 3.68 0.41  
-7 4 7 4.11 0.42  
6 -4 -7 13.57 0.81  
-6 -4 7 12.87 0.50  
-6 -4 7 11.73 0.66  
-6 -4 7 11.30 0.64  
-6 4 7 12.43 0.59  
6 4 -7 12.65 0.61  
6 4 -7 12.71 0.56  
6 4 -7 13.21 0.63  
5 -4 -7 9.33 0.68  
-5 -4 7 7.51 0.43  
-5 -4 7 7.92 0.50  
5 -4 -7 7.55 0.41  
-5 -4 7 7.71 0.55  
5 4 -7 7.93 0.44  
5 4 -7 8.05 0.51  
-5 4 7 8.00 0.49  
-5 4 7 7.28 0.67  
-5 4 7 8.16 0.47  
5 4 -7 7.40 0.49  
4 -4 -7 3.79 0.49  
4 -4 -7 4.66 0.35  
4 -4 -7 5.60 0.60  
-4 -4 7 4.60 0.37  
-4 -4 7 5.44 0.50  
-4 4 7 5.32 0.45  
4 4 -7 4.15 0.38  
-4 4 7 5.76 0.36  
4 4 -7 4.86 0.40  
4 4 -7 5.22 0.36  
-4 4 7 5.37 0.56

3 -4 -7 4.37 0.34  
3 -4 -7 4.23 0.55  
-3 -4 7 2.60 0.38  
-3 -4 7 3.23 0.40  
3 -4 -7 3.32 0.45  
3 4 -7 3.48 0.34  
-3 4 7 2.85 0.33  
3 4 -7 3.82 0.36  
-3 4 7 3.90 0.27  
3 4 -7 3.57 0.32  
-3 4 7 3.81 0.47  
3 4 -7 3.62 0.32  
2 -4 -7 3.19 0.32  
2 -4 -7 2.12 0.39  
-2 -4 7 2.66 0.38  
-2 -4 7 2.81 0.29  
-2 -4 7 2.60 0.32  
2 4 -7 2.73 0.29  
-2 4 7 3.33 0.34  
-2 4 7 3.38 0.22  
2 4 -7 2.80 0.32  
2 4 -7 2.87 0.29  
-2 4 7 2.77 0.39  
1 -4 -7 3.76 0.49  
1 -4 -7 3.21 0.46  
-1 -4 7 2.98 0.35  
-1 -4 7 3.88 0.42  
1 -4 -7 3.69 0.36  
-1 -4 7 3.41 0.33  
1 4 -7 3.13 0.33  
1 4 -7 3.81 0.36  
-1 4 7 2.86 0.43  
-1 4 7 3.61 0.34  
1 4 -7 3.26 0.30  
0 -4 -7 16.94 0.69  
0 -4 7 16.19 0.63  
0 -4 7 15.65 0.72  
0 -4 7 16.14 0.72  
0 -4 -7 17.04 0.84  
0 -4 -7 17.06 0.88  
0 4 -7 15.35 0.70  
0 4 7 16.50 0.63  
0 4 -7 18.07 0.73  
0 4 7 17.00 0.74  
0 4 -7 15.73 0.54  
-1 -4 -7 1.99 0.35

1 -4 7 2.54 0.39  
1 -4 7 3.02 0.38  
-1 -4 -7 2.26 0.45  
1 -4 7 1.39 0.34  
-1 4 -7 2.76 0.37  
1 4 7 1.82 0.27  
-1 4 -7 2.11 0.33  
-1 4 -7 1.69 0.21  
1 4 7 1.92 0.39  
-2 -4 -7 4.50 0.47  
2 -4 7 4.69 0.47  
-2 4 -7 4.00 0.45  
2 4 7 3.52 0.47  
-2 4 -7 4.25 0.46  
3 -4 7 13.36 0.74  
-3 -4 -7 13.09 0.71  
3 -4 7 13.29 0.73  
3 4 7 14.01 0.55  
3 4 7 12.37 0.72  
-3 4 -7 12.90 0.76  
-3 4 -7 12.73 0.65  
-4 -4 -7 2.59 0.40  
4 -4 7 3.12 0.46  
4 -4 7 2.37 0.45  
4 4 7 2.02 0.45  
-4 4 -7 2.52 0.38  
4 4 7 2.74 0.31  
-5 -4 -7 0.61 0.36  
5 -4 7 0.36 0.34  
5 -4 7 0.21 0.35  
5 4 7 1.07 0.40  
-5 4 -7 0.37 0.30  
6 -4 7 2.11 0.45  
-6 -4 -7 0.75 0.38  
6 -4 7 1.38 0.42  
-6 4 -7 1.60 0.41  
6 4 7 1.73 0.49  
7 -4 7 0.28 0.38  
-7 -4 -7 0.22 0.39  
7 -4 7 0.62 0.45  
-7 4 -7 0.21 0.32  
7 4 7 0.25 0.44  
8 -4 7 0.51 0.44  
-8 -4 -7 -0.06 0.44  
-8 4 -7 -0.20 0.39  
8 4 7 0.84 0.50

9 -4 7 0.16 0.51  
-9 -4 -7 0.72 0.52  
9 -4 7 0.35 0.49  
-9 4 -7 -0.28 0.39  
-9 4 -7 0.17 0.45  
9 4 7 -0.01 0.50  
-10 4 -7 0.48 0.53  
-10 4 -7 0.46 0.54  
-13 -5 7 0.27 0.50  
13 -5 -7 -0.18 0.48  
13 5 -7 -0.44 0.44  
-13 5 7 -0.08 0.38  
-12 -5 7 0.00 0.40  
12 -5 -7 0.26 0.51  
-12 5 7 -0.12 0.41  
12 5 -7 -0.10 0.41  
-11 -5 7 1.46 0.47  
11 -5 -7 -0.26 0.39  
-11 5 7 0.73 0.36  
-11 5 7 0.39 0.39  
11 5 -7 1.10 0.45  
-10 -5 7 0.26 0.41  
10 -5 -7 0.11 0.40  
10 5 -7 0.03 0.36  
-10 5 7 0.12 0.34  
-10 5 7 -0.06 0.33  
9 -5 -7 2.82 0.54  
-9 -5 7 2.79 0.50  
-9 5 7 2.75 0.41  
9 5 -7 4.15 0.47  
-9 5 7 4.13 0.47  
8 -5 -7 1.12 0.46  
-8 -5 7 1.56 0.39  
-8 5 7 1.30 0.35  
8 5 -7 1.16 0.35  
-8 5 7 1.37 0.34  
7 -5 -7 2.09 0.48  
-7 -5 7 3.02 0.37  
-7 -5 7 2.10 0.40  
-7 5 7 2.60 0.36  
7 5 -7 0.99 0.33  
-7 5 7 3.05 0.39  
-6 -5 7 1.06 0.36  
6 -5 -7 1.66 0.45  
-6 -5 7 1.20 0.29  
-6 5 7 2.04 0.34

-6 5 7 1.64 0.30  
6 5 -7 1.35 0.33  
-5 -5 7 19.40 0.85  
5 -5 -7 18.59 0.65  
-5 -5 7 18.53 0.69  
5 -5 -7 19.63 0.93  
-5 5 7 18.50 0.65  
5 5 -7 17.95 0.66  
-5 5 7 18.42 0.72  
5 5 -7 18.80 0.73  
5 5 -7 19.48 0.71  
-4 -5 7 4.54 0.46  
4 -5 -7 4.10 0.39  
4 -5 -7 4.76 0.55  
4 5 -7 4.45 0.35  
4 5 -7 4.08 0.40  
-4 5 7 5.08 0.43  
-4 5 7 4.46 0.55  
-4 5 7 4.78 0.34  
4 5 -7 4.45 0.34  
4 5 -7 4.59 0.35  
3 -5 -7 5.06 0.42  
3 -5 -7 4.81 0.57  
-3 -5 7 5.21 0.50  
-3 -5 7 4.81 0.41  
3 -5 -7 4.56 0.50  
3 5 -7 4.89 0.34  
3 5 -7 4.65 0.39  
3 5 -7 4.60 0.33  
3 5 -7 5.02 0.36  
-3 5 7 4.85 0.42  
-3 5 7 5.64 0.57  
-3 5 7 5.58 0.30  
2 -5 -7 12.90 0.58  
2 -5 -7 12.72 0.81  
-2 -5 7 12.71 0.47  
-2 -5 7 12.39 0.58  
-2 -5 7 11.18 0.63  
2 5 -7 12.35 0.55  
2 5 -7 12.82 0.55  
-2 5 7 13.01 0.60  
2 5 -7 13.15 0.52  
-1 -5 7 3.55 0.46  
-1 -5 7 2.74 0.37  
1 -5 -7 4.13 0.58  
-1 -5 7 4.22 0.33

|    |    |    |       |      |
|----|----|----|-------|------|
| 1  | -5 | -7 | 3.71  | 0.40 |
| 1  | -5 | -7 | 4.71  | 0.54 |
| -1 | 5  | 7  | 3.61  | 0.46 |
| 1  | 5  | -7 | 3.77  | 0.34 |
| 1  | 5  | -7 | 3.61  | 0.34 |
| -1 | 5  | 7  | 3.99  | 0.37 |
| 1  | 5  | -7 | 3.78  | 0.34 |
| 0  | -5 | 7  | 3.10  | 0.33 |
| 0  | -5 | 7  | 2.79  | 0.38 |
| 0  | -5 | -7 | 2.33  | 0.47 |
| 0  | -5 | 7  | 2.23  | 0.33 |
| 0  | -5 | -7 | 3.25  | 0.38 |
| 0  | 5  | 7  | 2.75  | 0.44 |
| 0  | 5  | -7 | 1.87  | 0.25 |
| 0  | 5  | -7 | 1.89  | 0.29 |
| 0  | 5  | 7  | 2.20  | 0.34 |
| 0  | 5  | -7 | 1.98  | 0.35 |
| 1  | -5 | 7  | 5.11  | 0.47 |
| -1 | -5 | -7 | 4.40  | 0.44 |
| 1  | -5 | 7  | 3.69  | 0.45 |
| 1  | -5 | 7  | 3.45  | 0.40 |
| -1 | 5  | -7 | 3.51  | 0.28 |
| 1  | 5  | 7  | 5.05  | 0.53 |
| 1  | 5  | 7  | 4.00  | 0.39 |
| -1 | 5  | -7 | 3.57  | 0.39 |
| -1 | 5  | -7 | 2.90  | 0.39 |
| -2 | -5 | -7 | 3.47  | 0.43 |
| 2  | -5 | 7  | 3.23  | 0.40 |
| 2  | -5 | 7  | 3.23  | 0.43 |
| 2  | -5 | 7  | 3.02  | 0.46 |
| 2  | 5  | 7  | 3.27  | 0.34 |
| -2 | 5  | -7 | 3.30  | 0.45 |
| -2 | 5  | -7 | 3.08  | 0.41 |
| 2  | 5  | 7  | 3.48  | 0.50 |
| 3  | -5 | 7  | 21.35 | 0.88 |
| -3 | -5 | -7 | 22.45 | 0.92 |
| -3 | 5  | -7 | 21.20 | 0.95 |
| -3 | 5  | -7 | 20.08 | 0.85 |
| 3  | 5  | 7  | 20.47 | 0.93 |
| 4  | -5 | 7  | 8.58  | 0.63 |
| 4  | -5 | 7  | 6.75  | 0.63 |
| -4 | -5 | -7 | 6.23  | 0.57 |
| 4  | 5  | 7  | 6.66  | 0.63 |
| -4 | 5  | -7 | 8.65  | 0.65 |
| 4  | 5  | 7  | 7.33  | 0.47 |
| 5  | -5 | 7  | 0.24  | 0.38 |

5 -5 7 0.10 0.34  
-5 -5 -7 -0.32 0.32  
-5 5 -7 -0.27 0.28  
5 5 7 -0.53 0.37  
6 -5 7 0.93 0.39  
-6 -5 -7 1.12 0.40  
6 -5 7 1.02 0.40  
-6 5 -7 1.01 0.41  
6 5 7 1.06 0.47  
-7 -5 -7 -0.06 0.40  
7 -5 7 0.44 0.41  
7 -5 7 0.05 0.40  
-7 5 -7 0.11 0.38  
7 5 7 0.44 0.46  
8 -5 7 1.36 0.50  
-8 -5 -7 1.12 0.47  
8 -5 7 1.58 0.49  
-8 5 -7 1.45 0.51  
8 5 7 2.11 0.53  
-9 -5 -7 0.16 0.53  
9 -5 7 0.38 0.52  
9 -5 7 0.15 0.49  
9 5 7 1.04 0.57  
-9 5 -7 1.52 0.52  
-9 5 -7 0.61 0.49  
-13 -6 7 -0.42 0.48  
13 -6 -7 0.37 0.52  
-13 6 7 -0.28 0.43  
13 6 -7 -0.16 0.48  
-12 -6 7 0.16 0.47  
12 -6 -7 -0.21 0.48  
12 6 -7 -0.42 0.37  
-12 6 7 0.47 0.39  
11 -6 -7 0.29 0.46  
-11 -6 7 0.34 0.44  
11 6 -7 0.52 0.39  
-11 6 7 -0.02 0.36  
-11 6 7 0.44 0.39  
10 -6 -7 0.77 0.44  
-10 -6 7 0.33 0.41  
10 6 -7 0.10 0.33  
-10 6 7 0.26 0.34  
-10 6 7 0.20 0.34  
9 -6 -7 0.20 0.43  
-9 -6 7 0.68 0.37  
-9 6 7 -0.23 0.31



-9 6 7 0.36 0.32  
9 6 -7 0.42 0.34  
-8 -6 7 -0.07 0.37  
8 -6 -7 0.47 0.44  
-8 6 7 0.18 0.28  
-8 6 7 0.70 0.30  
8 6 -7 0.14 0.31  
-7 -6 7 0.76 0.29  
7 -6 -7 1.01 0.43  
-7 -6 7 1.02 0.40  
7 6 -7 1.11 0.33  
-7 6 7 0.68 0.30  
-6 -6 7 6.57 0.48  
-6 -6 7 4.18 0.50  
6 -6 -7 5.38 0.60  
-6 6 7 6.52 0.45  
-6 6 7 5.31 0.48  
6 6 -7 4.45 0.46  
-5 -6 7 8.16 0.64  
5 -6 -7 7.64 0.52  
5 -6 -7 7.77 0.69  
-5 6 7 9.20 0.56  
-5 6 7 8.92 0.46  
5 6 -7 8.96 0.56  
4 -6 -7 3.60 0.42  
4 -6 -7 4.57 0.57  
-4 -6 7 2.78 0.47  
-4 -6 7 3.28 0.39  
4 6 -7 4.10 0.42  
-4 6 7 4.34 0.46  
-4 6 7 4.97 0.33  
3 -6 -7 3.00 0.45  
-3 -6 7 2.82 0.40  
3 -6 -7 3.76 0.42  
-3 -6 7 3.19 0.44  
-3 6 7 3.68 0.39  
3 6 -7 4.28 0.40  
-2 -6 7 4.78 0.48  
2 -6 -7 4.09 0.53  
2 -6 -7 4.44 0.45  
-2 -6 7 4.03 0.47  
2 6 -7 3.83 0.38  
-2 6 7 2.80 0.37  
1 -6 -7 8.59 0.57  
-1 -6 7 7.40 0.60  
-1 -6 7 7.82 0.59

|    |    |    |       |      |
|----|----|----|-------|------|
| 1  | 6  | -7 | 8.28  | 0.46 |
| 1  | 6  | -7 | 7.24  | 0.43 |
| -1 | 6  | 7  | 8.35  | 0.63 |
| -1 | 6  | 7  | 7.54  | 0.49 |
| 1  | 6  | -7 | 6.69  | 0.44 |
| 0  | -6 | 7  | 0.16  | 0.24 |
| 0  | -6 | 7  | 0.52  | 0.36 |
| 0  | -6 | -7 | 0.63  | 0.30 |
| 0  | 6  | 7  | 0.09  | 0.37 |
| 0  | 6  | -7 | 0.14  | 0.21 |
| 0  | 6  | 7  | 0.51  | 0.27 |
| 0  | 6  | -7 | 0.46  | 0.24 |
| 0  | 6  | -7 | 0.10  | 0.31 |
| 1  | -6 | 7  | 0.58  | 0.37 |
| 1  | -6 | 7  | 1.62  | 0.31 |
| 1  | -6 | 7  | 1.32  | 0.53 |
| -1 | -6 | -7 | 1.71  | 0.40 |
| 1  | 6  | 7  | 1.25  | 0.29 |
| -1 | 6  | -7 | 1.05  | 0.32 |
| -1 | 6  | -7 | 1.30  | 0.24 |
| 1  | 6  | 7  | 1.49  | 0.43 |
| -1 | 6  | -7 | 1.38  | 0.30 |
| -2 | -6 | -7 | 2.24  | 0.41 |
| 2  | -6 | 7  | 1.83  | 0.40 |
| 2  | -6 | 7  | 2.33  | 0.38 |
| 2  | 6  | 7  | 1.68  | 0.43 |
| -2 | 6  | -7 | 1.22  | 0.38 |
| -2 | 6  | -7 | 2.45  | 0.37 |
| 2  | 6  | 7  | 2.58  | 0.33 |
| 3  | -6 | 7  | -0.01 | 0.29 |
| 3  | -6 | 7  | 0.11  | 0.31 |
| -3 | -6 | -7 | 0.34  | 0.35 |
| -3 | 6  | -7 | -0.07 | 0.27 |
| 3  | 6  | 7  | 0.77  | 0.28 |
| -3 | 6  | -7 | 0.71  | 0.34 |
| 3  | 6  | 7  | 0.76  | 0.38 |
| -4 | -6 | -7 | 6.99  | 0.64 |
| 4  | -6 | 7  | 6.65  | 0.64 |
| -4 | 6  | -7 | 6.54  | 0.61 |
| 4  | 6  | 7  | 6.30  | 0.62 |
| -5 | -6 | -7 | 2.09  | 0.47 |
| 5  | -6 | 7  | 1.81  | 0.42 |
| 5  | -6 | 7  | 3.16  | 0.47 |
| 5  | 6  | 7  | 2.55  | 0.51 |
| -5 | 6  | -7 | 2.20  | 0.47 |
| 6  | -6 | 7  | 0.44  | 0.39 |

-6 -6 -7 0.15 0.40  
6 -6 7 0.20 0.41  
6 6 7 -0.41 0.35  
-6 6 -7 -0.28 0.32  
7 -6 7 0.21 0.40  
7 -6 7 1.24 0.45  
-7 -6 -7 0.94 0.44  
7 6 7 0.40 0.46  
-7 6 -7 0.90 0.47  
8 -6 7 -0.12 0.45  
8 -6 7 0.24 0.45  
-8 -6 -7 0.20 0.50  
-8 6 -7 0.17 0.47  
8 6 7 -0.42 0.46  
9 -6 7 0.45 0.53  
9 -6 7 0.46 0.50  
-9 -6 -7 -0.42 0.52  
-9 6 -7 0.39 0.51  
9 6 7 -0.01 0.51  
-13 -7 7 -0.31 0.48  
13 7 -7 0.15 0.51  
-13 7 7 0.30 0.49  
-12 -7 7 0.69 0.51  
12 -7 -7 0.39 0.54  
-12 7 7 0.28 0.43  
12 7 -7 0.49 0.49  
11 -7 -7 0.20 0.43  
-11 -7 7 0.26 0.45  
11 7 -7 -0.15 0.39  
-11 7 7 -0.20 0.36  
10 -7 -7 -0.41 0.40  
-10 -7 7 0.37 0.39  
10 7 -7 -0.45 0.33  
-10 7 7 -0.12 0.34  
-10 7 7 0.10 0.34  
9 -7 -7 1.99 0.52  
-9 -7 7 2.25 0.49  
-9 7 7 2.42 0.43  
-9 7 7 1.76 0.37  
9 7 -7 0.88 0.37  
-8 -7 7 0.91 0.38  
8 -7 -7 0.29 0.46  
-8 7 7 0.59 0.31  
8 7 -7 0.31 0.37  
-8 7 7 0.24 0.35  
-7 -7 7 0.25 0.33

7 -7 -7 0.29 0.44  
-7 -7 7 0.10 0.30  
-7 7 7 0.54 0.28  
7 7 -7 0.93 0.37  
-7 7 7 0.53 0.31  
-6 -7 7 2.23 0.46  
6 -7 -7 2.60 0.53  
-6 -7 7 3.38 0.65  
-6 7 7 2.79 0.34  
6 7 -7 2.49 0.39  
-6 7 7 3.89 0.48  
5 -7 -7 2.71 0.37  
5 -7 -7 1.37 0.44  
-5 -7 7 1.66 0.37  
-5 -7 7 2.69 0.47  
5 7 -7 1.74 0.36  
-5 7 7 2.67 0.43  
-5 7 7 2.61 0.38  
4 -7 -7 1.56 0.43  
4 -7 -7 2.11 0.41  
-4 -7 7 2.30 0.39  
-4 -7 7 2.10 0.44  
-4 7 7 1.51 0.34  
4 7 -7 0.96 0.31  
3 -7 -7 13.18 0.80  
3 -7 -7 15.29 0.72  
-3 -7 7 11.60 0.68  
-3 -7 7 12.27 0.70  
-3 7 7 13.99 0.69  
3 7 -7 13.44 0.66  
-2 -7 7 5.30 0.49  
2 -7 -7 5.98 0.54  
-2 -7 7 7.69 0.61  
2 -7 -7 7.03 0.62  
2 7 -7 6.26 0.45  
-2 7 7 6.10 0.50  
1 -7 -7 4.32 0.50  
-1 -7 7 4.01 0.49  
1 7 -7 3.94 0.38  
-1 7 7 4.34 0.43  
-1 7 7 4.65 0.55  
0 -7 -7 28.60 1.06  
0 -7 7 28.04 1.04  
0 7 -7 27.21 1.01  
0 7 -7 28.76 0.84  
0 7 7 29.32 0.96

0 7 7 29.15 1.07  
1 -7 7 9.75 0.68  
-1 -7 -7 11.45 0.67  
-1 7 -7 10.26 0.64  
1 7 7 10.73 0.57  
1 7 7 11.14 0.73  
-2 -7 -7 0.49 0.32  
2 -7 7 -0.05 0.32  
2 7 7 1.42 0.42  
-2 7 -7 0.46 0.31  
2 7 7 0.73 0.28  
3 -7 7 3.82 0.49  
3 -7 7 3.56 0.54  
-3 -7 -7 3.15 0.48  
3 7 7 3.85 0.56  
-3 7 -7 3.67 0.47  
3 7 7 3.41 0.41  
4 -7 7 4.99 0.60  
4 -7 7 6.76 0.57  
-4 -7 -7 6.36 0.64  
-4 7 -7 5.99 0.59  
4 7 7 6.35 0.63  
4 7 7 6.11 0.51  
5 -7 7 0.88 0.42  
-5 -7 -7 0.43 0.36  
-5 7 -7 0.01 0.37  
5 7 7 0.06 0.41  
-6 -7 -7 2.02 0.52  
6 -7 7 1.21 0.44  
6 -7 7 1.51 0.46  
6 7 7 1.30 0.49  
-6 7 -7 1.08 0.47  
-7 -7 -7 0.94 0.51  
7 -7 7 0.75 0.47  
7 -7 7 0.62 0.48  
-7 7 -7 -0.13 0.43  
7 7 7 1.10 0.53  
-8 -7 -7 0.22 0.52  
8 -7 7 0.16 0.44  
8 -7 7 0.40 0.47  
-8 7 -7 0.03 0.48  
8 7 7 0.56 0.52  
9 -7 7 0.78 0.51  
-12 -8 7 0.38 0.52  
12 -8 -7 0.36 0.55  
-12 8 7 -0.15 0.42

12 8 -7 -0.38 0.48  
-11 -8 7 -0.52 0.43  
11 -8 -7 0.25 0.52  
-11 8 7 0.22 0.39  
11 8 -7 -0.36 0.44  
10 -8 -7 0.85 0.52  
-10 -8 7 2.53 0.55  
-10 8 7 1.08 0.41  
10 8 -7 1.72 0.45  
-10 8 7 2.02 0.47  
-9 -8 7 1.63 0.48  
9 -8 -7 1.28 0.51  
9 8 -7 0.77 0.42  
-9 8 7 1.41 0.41  
-9 8 7 0.91 0.36  
8 -8 -7 0.21 0.46  
-8 -8 7 0.21 0.39  
-8 8 7 0.27 0.32  
8 8 -7 0.63 0.35  
-7 -8 7 1.12 0.41  
-7 -8 7 0.75 0.36  
7 -8 -7 0.77 0.45  
-7 8 7 0.82 0.31  
7 8 -7 1.08 0.37  
-7 8 7 1.09 0.40  
6 -8 -7 1.35 0.45  
-6 -8 7 1.70 0.45  
6 8 -7 1.51 0.37  
-6 8 7 1.84 0.41  
-5 -8 7 0.05 0.32  
5 -8 -7 -0.29 0.30  
5 -8 -7 0.04 0.39  
-5 -8 7 0.43 0.33  
-5 8 7 -0.43 0.27  
5 8 -7 -0.03 0.29  
4 -8 -7 12.31 0.83  
-4 -8 7 12.58 0.78  
-4 -8 7 14.09 0.72  
4 -8 -7 12.24 0.69  
4 8 -7 13.18 0.66  
-4 8 7 13.97 0.72  
-3 -8 7 2.65 0.47  
-3 -8 7 2.54 0.42  
3 -8 -7 2.34 0.44  
3 -8 -7 2.45 0.48  
3 8 -7 2.93 0.39

-3 8 7 2.87 0.44  
2 -8 -7 10.68 0.71  
2 -8 -7 10.61 0.75  
-2 -8 7 8.78 0.60  
-2 -8 7 10.90 0.71  
-2 8 7 9.15 0.59  
2 8 -7 9.91 0.55  
-1 -8 7 10.17 0.69  
1 -8 -7 10.60 0.72  
1 -8 -7 10.21 0.72  
1 8 -7 9.29 0.67  
1 8 -7 9.84 0.55  
-1 8 7 11.02 0.60  
0 -8 -7 13.20 0.80  
0 -8 7 13.93 0.74  
0 8 -7 14.39 0.62  
0 8 7 17.37 0.84  
0 8 -7 12.84 0.72  
0 8 7 14.68 0.72  
1 -8 7 5.98 0.60  
-1 -8 -7 5.87 0.61  
-1 8 -7 4.84 0.52  
1 8 7 5.20 0.48  
1 8 7 4.66 0.54  
-2 -8 -7 3.08 0.48  
2 -8 7 3.93 0.51  
2 8 7 3.72 0.43  
2 8 7 4.88 0.55  
-2 8 -7 3.19 0.49  
3 -8 7 2.57 0.45  
-3 -8 -7 1.09 0.40  
3 8 7 1.32 0.45  
3 8 7 1.68 0.37  
-3 8 -7 2.52 0.46  
-4 -8 -7 0.28 0.37  
4 -8 7 0.19 0.40  
4 8 7 -0.17 0.40  
4 8 7 0.28 0.31  
-4 8 -7 0.38 0.33  
-5 -8 -7 1.09 0.48  
5 -8 7 1.73 0.49  
-5 8 -7 0.86 0.43  
5 8 7 0.79 0.33  
5 8 7 0.74 0.46  
6 -8 7 0.17 0.40  
-6 -8 -7 0.21 0.50

6 8 7 0.12 0.47  
-6 8 -7 0.36 0.45  
7 -8 7 0.39 0.49  
-7 -8 -7 -0.25 0.45  
-7 8 -7 0.36 0.46  
7 8 7 0.47 0.49  
8 -8 7 0.39 0.53  
-8 -8 -7 -0.38 0.56  
8 8 7 0.22 0.53  
-8 8 -7 0.34 0.45  
-12 -9 7 0.30 0.49  
-12 9 7 -0.13 0.43  
12 9 -7 0.13 0.51  
11 -9 -7 0.02 0.51  
-11 -9 7 -0.22 0.41  
-11 9 7 0.22 0.40  
11 9 -7 0.03 0.49  
-10 -9 7 2.20 0.55  
10 -9 -7 1.35 0.55  
-10 9 7 1.16 0.44  
-10 9 7 1.71 0.46  
10 9 -7 1.29 0.47  
9 -9 -7 2.77 0.59  
-9 -9 7 2.01 0.46  
9 9 -7 2.37 0.54  
-9 9 7 2.18 0.50  
-9 9 7 3.00 0.52  
8 -9 -7 0.67 0.51  
-8 -9 7 0.24 0.39  
8 9 -7 1.31 0.41  
-8 9 7 1.09 0.43  
7 -9 -7 0.07 0.45  
-7 -9 7 0.53 0.41  
-7 9 7 0.58 0.38  
7 9 -7 0.17 0.34  
-6 -9 7 0.17 0.38  
-6 -9 7 0.08 0.34  
6 -9 -7 0.20 0.45  
-6 9 7 0.12 0.35  
6 9 -7 0.30 0.34  
-5 -9 7 2.07 0.44  
5 -9 -7 2.13 0.42  
-5 -9 7 2.69 0.49  
5 -9 -7 2.60 0.56  
-5 9 7 2.55 0.47  
5 9 -7 2.39 0.41



4 -9 -7 0.80 0.39  
4 -9 -7 -0.02 0.38  
-4 -9 7 0.39 0.32  
-4 -9 7 -0.16 0.36  
4 9 -7 0.08 0.31  
-4 9 7 -0.22 0.30  
-3 -9 7 5.15 0.51  
3 -9 -7 5.27 0.61  
3 -9 -7 6.70 0.64  
-3 -9 7 5.77 0.60  
3 9 -7 5.31 0.53  
-3 9 7 6.14 0.58  
-2 -9 7 5.44 0.56  
2 -9 -7 6.09 0.62  
2 -9 -7 7.20 0.66  
-2 -9 7 5.80 0.59  
2 9 -7 6.04 0.50  
-2 9 7 5.67 0.52  
1 -9 -7 5.06 0.61  
1 -9 -7 2.85 0.51  
-1 -9 7 2.87 0.49  
-1 9 7 3.71 0.45  
1 9 -7 3.38 0.51  
1 9 -7 3.40 0.40  
0 -9 -7 7.40 0.70  
0 -9 7 4.31 0.55  
0 9 7 6.47 0.55  
0 9 -7 6.11 0.47  
0 9 -7 6.34 0.60  
1 -9 7 8.95 0.67  
-1 -9 -7 9.46 0.80  
1 9 7 9.79 0.74  
-1 9 -7 7.20 0.66  
1 9 7 9.83 0.65  
-2 -9 -7 6.24 0.65  
2 -9 7 4.28 0.56  
2 9 7 5.62 0.55  
-2 9 -7 4.90 0.56  
2 9 7 6.98 0.67  
3 -9 7 0.39 0.37  
-3 -9 -7 -0.09 0.41  
3 9 7 0.64 0.34  
-3 9 -7 0.47 0.39  
3 9 7 0.69 0.41  
4 -9 7 4.21 0.59  
-4 -9 -7 2.96 0.58

4 9 7 3.48 0.57  
-4 9 -7 3.88 0.57  
4 9 7 3.66 0.46  
-5 -9 -7 0.18 0.44  
5 -9 7 -0.06 0.43  
-5 9 -7 0.41 0.43  
5 9 7 0.69 0.35  
5 9 7 0.22 0.46  
-6 -9 -7 0.32 0.47  
6 -9 7 0.41 0.44  
6 9 7 0.44 0.50  
-6 9 -7 0.72 0.44  
7 -9 7 1.66 0.58  
-7 -9 -7 0.65 0.58  
-7 9 -7 1.79 0.57  
7 9 7 1.21 0.56  
8 9 7 -0.29 0.53  
11 -10 -7 -0.53 0.53  
-11 -10 7 0.32 0.47  
11 10 -7 0.55 0.48  
-10 -10 7 0.05 0.42  
10 -10 -7 -0.05 0.53  
10 10 -7 0.34 0.46  
-9 -10 7 1.14 0.48  
9 -10 -7 -0.09 0.49  
9 10 -7 0.57 0.45  
-9 10 7 0.63 0.45  
8 -10 -7 0.57 0.52  
-8 -10 7 0.77 0.39  
-8 10 7 0.45 0.39  
8 10 -7 0.72 0.42  
-7 -10 7 0.01 0.36  
-7 -10 7 0.61 0.43  
7 -10 -7 0.33 0.47  
-7 10 7 0.11 0.35  
7 10 -7 0.36 0.42  
-6 -10 7 0.52 0.40  
-6 -10 7 0.34 0.39  
6 -10 -7 -0.31 0.42  
-6 10 7 0.27 0.39  
6 10 -7 0.27 0.35  
-5 -10 7 0.21 0.37  
-5 -10 7 0.22 0.38  
5 -10 -7 0.19 0.45  
5 10 -7 0.37 0.36  
-5 10 7 0.61 0.36

|    |     |    |       |      |
|----|-----|----|-------|------|
| 4  | -10 | -7 | 2.16  | 0.53 |
| -4 | -10 | 7  | 2.33  | 0.46 |
| -4 | -10 | 7  | 2.09  | 0.47 |
| 4  | -10 | -7 | 1.35  | 0.44 |
| 4  | 10  | -7 | 1.80  | 0.41 |
| -4 | 10  | 7  | 1.80  | 0.42 |
| 3  | -10 | -7 | 4.98  | 0.60 |
| -3 | -10 | 7  | 4.52  | 0.58 |
| 3  | -10 | -7 | 4.41  | 0.61 |
| -3 | -10 | 7  | 4.18  | 0.54 |
| 3  | 10  | -7 | 4.87  | 0.54 |
| -3 | 10  | 7  | 5.42  | 0.59 |
| 2  | -10 | -7 | 0.97  | 0.45 |
| 2  | -10 | -7 | 0.90  | 0.46 |
| -2 | -10 | 7  | 0.45  | 0.36 |
| -2 | 10  | 7  | 0.46  | 0.33 |
| 2  | 10  | -7 | -0.16 | 0.27 |
| 2  | 10  | -7 | 0.50  | 0.34 |
| 1  | -10 | -7 | 0.18  | 0.39 |
| 1  | -10 | -7 | 0.29  | 0.39 |
| -1 | -10 | 7  | -0.12 | 0.37 |
| 1  | 10  | -7 | -0.14 | 0.28 |
| 1  | 10  | -7 | -0.22 | 0.29 |
| -1 | 10  | 7  | -0.10 | 0.34 |
| 0  | -10 | -7 | 0.84  | 0.48 |
| 0  | -10 | 7  | 0.86  | 0.39 |
| 0  | -10 | -7 | 1.27  | 0.42 |
| 0  | 10  | -7 | 0.62  | 0.33 |
| 0  | 10  | 7  | 0.52  | 0.32 |
| 0  | 10  | -7 | 0.33  | 0.33 |
| 1  | -10 | 7  | 0.45  | 0.36 |
| -1 | -10 | -7 | 0.17  | 0.46 |
| -1 | 10  | -7 | 0.70  | 0.39 |
| 1  | 10  | 7  | 0.51  | 0.32 |
| 1  | 10  | 7  | 0.59  | 0.44 |
| 2  | -10 | 7  | 0.19  | 0.40 |
| -2 | -10 | -7 | 0.22  | 0.42 |
| 2  | 10  | 7  | 0.23  | 0.42 |
| -2 | 10  | -7 | 0.31  | 0.36 |
| 2  | 10  | 7  | 0.41  | 0.31 |
| 3  | -10 | 7  | 2.11  | 0.50 |
| -3 | -10 | -7 | 1.64  | 0.56 |
| 3  | 10  | 7  | 1.03  | 0.48 |
| 3  | 10  | 7  | 1.56  | 0.38 |
| -3 | 10  | -7 | 1.20  | 0.41 |
| -4 | -10 | -7 | -0.12 | 0.43 |

|     |     |    |       |      |
|-----|-----|----|-------|------|
| 4   | -10 | 7  | 0.96  | 0.47 |
| -4  | 10  | -7 | 0.63  | 0.44 |
| 4   | 10  | 7  | 1.07  | 0.48 |
| 4   | 10  | 7  | 0.61  | 0.38 |
| 5   | -10 | 7  | 0.71  | 0.48 |
| -5  | -10 | -7 | -0.72 | 0.49 |
| 5   | 10  | 7  | -0.17 | 0.46 |
| 5   | 10  | 7  | 0.60  | 0.39 |
| -5  | 10  | -7 | 0.26  | 0.45 |
| -6  | -10 | -7 | 0.76  | 0.54 |
| 6   | -10 | 7  | 1.42  | 0.54 |
| -6  | 10  | -7 | 0.93  | 0.48 |
| 6   | 10  | 7  | 1.27  | 0.56 |
| 7   | 10  | 7  | -0.71 | 0.54 |
| -11 | -11 | 7  | 0.52  | 0.54 |
| 10  | -11 | -7 | -0.20 | 0.54 |
| -10 | -11 | 7  | 0.02  | 0.45 |
| 10  | 11  | -7 | 0.46  | 0.55 |
| -9  | -11 | 7  | 0.95  | 0.47 |
| 9   | -11 | -7 | 0.92  | 0.55 |
| -9  | 11  | 7  | 1.51  | 0.51 |
| 9   | 11  | -7 | 1.16  | 0.49 |
| -8  | -11 | 7  | 0.32  | 0.43 |
| 8   | -11 | -7 | 0.12  | 0.52 |
| 8   | 11  | -7 | -0.78 | 0.38 |
| -8  | 11  | 7  | 0.40  | 0.44 |
| 7   | -11 | -7 | 3.02  | 0.64 |
| -7  | -11 | 7  | 2.99  | 0.56 |
| -7  | -11 | 7  | 2.32  | 0.51 |
| 7   | 11  | -7 | 3.85  | 0.62 |
| -7  | 11  | 7  | 2.93  | 0.56 |
| 6   | -11 | -7 | 0.87  | 0.51 |
| -6  | -11 | 7  | 1.00  | 0.40 |
| -6  | -11 | 7  | 0.34  | 0.41 |
| 6   | 11  | -7 | 0.13  | 0.39 |
| -6  | 11  | 7  | 1.18  | 0.48 |
| -5  | -11 | 7  | 0.84  | 0.43 |
| 5   | -11 | -7 | 0.42  | 0.47 |
| -5  | -11 | 7  | 0.55  | 0.37 |
| 5   | 11  | -7 | 0.22  | 0.38 |
| -5  | 11  | 7  | 0.42  | 0.37 |
| -4  | -11 | 7  | 1.22  | 0.45 |
| -4  | -11 | 7  | 0.96  | 0.39 |
| 4   | -11 | -7 | 0.29  | 0.40 |
| 4   | -11 | -7 | 0.87  | 0.49 |
| -4  | 11  | 7  | 1.43  | 0.42 |

|    |     |    |       |      |
|----|-----|----|-------|------|
| 4  | 11  | -7 | 0.54  | 0.42 |
| 3  | -11 | -7 | -0.72 | 0.40 |
| 3  | -11 | -7 | 0.47  | 0.45 |
| -3 | -11 | 7  | 0.09  | 0.40 |
| -3 | -11 | 7  | -0.07 | 0.39 |
| 3  | 11  | -7 | -0.11 | 0.38 |
| -3 | 11  | 7  | 0.72  | 0.42 |
| -2 | -11 | 7  | 1.05  | 0.41 |
| 2  | -11 | -7 | -0.05 | 0.43 |
| 2  | -11 | -7 | 1.19  | 0.48 |
| -2 | 11  | 7  | 1.13  | 0.39 |
| 2  | 11  | -7 | 0.12  | 0.31 |
| 2  | 11  | -7 | 0.95  | 0.43 |
| 1  | -11 | -7 | 3.18  | 0.55 |
| -1 | -11 | 7  | 3.48  | 0.51 |
| 1  | -11 | -7 | 4.16  | 0.64 |
| -1 | 11  | 7  | 2.68  | 0.46 |
| 1  | 11  | -7 | 3.53  | 0.55 |
| 1  | 11  | -7 | 3.19  | 0.46 |
| 0  | -11 | -7 | 0.26  | 0.43 |
| 0  | -11 | 7  | 0.04  | 0.40 |
| 0  | -11 | -7 | 0.75  | 0.42 |
| 0  | 11  | -7 | 0.00  | 0.34 |
| 0  | 11  | 7  | 0.32  | 0.38 |
| -1 | -11 | -7 | 0.26  | 0.43 |
| -1 | -11 | -7 | 0.78  | 0.44 |
| 1  | -11 | 7  | 0.53  | 0.43 |
| 1  | 11  | 7  | 0.43  | 0.35 |
| -1 | 11  | -7 | 0.22  | 0.40 |
| 2  | -11 | 7  | 3.80  | 0.58 |
| -2 | -11 | -7 | 3.38  | 0.68 |
| -2 | 11  | -7 | 3.83  | 0.58 |
| 2  | 11  | 7  | 4.92  | 0.65 |
| 2  | 11  | 7  | 3.93  | 0.52 |
| -3 | -11 | -7 | 1.61  | 0.55 |
| 3  | -11 | 7  | 2.43  | 0.56 |
| 3  | 11  | 7  | 1.15  | 0.49 |
| -3 | 11  | -7 | 1.35  | 0.44 |
| 3  | 11  | 7  | 1.22  | 0.38 |
| 4  | -11 | 7  | -0.29 | 0.45 |
| -4 | -11 | -7 | -0.45 | 0.52 |
| 4  | 11  | 7  | -0.10 | 0.50 |
| 4  | 11  | 7  | 0.08  | 0.35 |
| -4 | 11  | -7 | -0.16 | 0.43 |
| 5  | -11 | 7  | 0.45  | 0.45 |
| -5 | -11 | -7 | -0.23 | 0.54 |

-5 11 -7 0.50 0.48  
5 11 7 0.57 0.41  
5 11 7 0.28 0.56  
6 -11 7 0.73 0.58  
-10 -12 7 -0.44 0.45  
-9 -12 7 0.29 0.45  
9 -12 -7 -0.36 0.55  
9 12 -7 -0.20 0.47  
-8 -12 7 0.50 0.47  
8 -12 -7 -0.13 0.53  
-8 12 7 0.55 0.49  
8 12 -7 0.66 0.47  
7 -12 -7 1.14 0.59  
-7 -12 7 1.26 0.50  
-7 -12 7 1.08 0.50  
7 12 -7 1.86 0.56  
-7 12 7 1.19 0.46  
-6 -12 7 0.37 0.46  
-6 -12 7 1.23 0.49  
6 -12 -7 -0.10 0.54  
-6 12 7 0.88 0.45  
6 12 -7 0.79 0.49  
-5 -12 7 0.21 0.44  
5 -12 -7 -0.49 0.48  
-5 -12 7 -0.22 0.38  
-5 12 7 0.29 0.41  
5 12 -7 -0.04 0.39  
-4 -12 7 1.70 0.46  
4 -12 -7 -0.21 0.51  
4 -12 -7 1.76 0.50  
-4 -12 7 0.65 0.44  
4 12 -7 0.31 0.40  
-4 12 7 0.69 0.47  
3 -12 -7 -0.09 0.44  
-3 -12 7 0.82 0.46  
3 -12 -7 -0.03 0.49  
3 12 -7 0.59 0.39  
-3 12 7 0.61 0.42  
3 12 -7 0.75 0.45  
-2 -12 7 1.30 0.45  
2 -12 -7 0.83 0.49  
2 -12 -7 1.14 0.52  
2 12 -7 1.13 0.46  
-2 12 7 0.47 0.41  
2 12 -7 0.77 0.44  
1 -12 -7 -0.51 0.42

|    |     |    |       |      |
|----|-----|----|-------|------|
| 1  | -12 | -7 | -0.02 | 0.50 |
| -1 | -12 | 7  | 0.05  | 0.44 |
| 1  | 12  | -7 | -0.31 | 0.36 |
| -1 | 12  | 7  | 0.05  | 0.36 |
| 1  | 12  | -7 | 0.09  | 0.41 |
| 0  | -12 | -7 | 1.04  | 0.57 |
| 0  | -12 | -7 | 1.21  | 0.50 |
| 0  | -12 | 7  | 1.28  | 0.49 |
| 0  | 12  | -7 | 0.49  | 0.39 |
| 0  | 12  | 7  | 0.78  | 0.40 |
| -1 | -12 | -7 | 0.34  | 0.52 |
| 1  | -12 | 7  | 0.80  | 0.44 |
| -1 | -12 | -7 | 1.61  | 0.60 |
| -1 | 12  | -7 | 0.45  | 0.41 |
| 1  | 12  | 7  | 1.22  | 0.46 |
| -2 | -12 | -7 | -0.29 | 0.56 |
| 2  | -12 | 7  | 1.45  | 0.50 |
| -2 | 12  | -7 | 0.18  | 0.45 |
| 2  | 12  | 7  | 0.18  | 0.41 |
| -3 | -12 | -7 | -0.20 | 0.50 |
| 3  | -12 | 7  | 0.26  | 0.48 |
| -3 | 12  | -7 | 0.00  | 0.39 |
| 3  | 12  | 7  | -0.25 | 0.35 |
| -4 | -12 | -7 | -0.69 | 0.58 |
| 4  | -12 | 7  | -0.35 | 0.46 |
| 4  | 12  | 7  | -0.27 | 0.34 |
| -4 | 12  | -7 | -0.24 | 0.44 |
| 5  | 12  | 7  | 0.11  | 0.41 |
| 9  | -13 | -7 | 0.04  | 0.63 |
| -9 | -13 | 7  | -0.01 | 0.48 |
| 8  | -13 | -7 | -0.20 | 0.54 |
| -8 | -13 | 7  | 0.05  | 0.45 |
| -8 | 13  | 7  | -0.30 | 0.46 |
| -7 | -13 | 7  | 0.11  | 0.47 |
| 7  | -13 | -7 | -0.28 | 0.56 |
| -7 | -13 | 7  | -0.07 | 0.45 |
| 7  | 13  | -7 | 0.56  | 0.48 |
| -7 | 13  | 7  | 0.25  | 0.50 |
| -6 | -13 | 7  | 1.39  | 0.45 |
| 6  | -13 | -7 | 1.54  | 0.63 |
| -6 | -13 | 7  | 1.97  | 0.50 |
| -6 | 13  | 7  | 1.82  | 0.54 |
| 6  | 13  | -7 | 0.18  | 0.45 |
| -5 | -13 | 7  | -0.06 | 0.47 |
| 5  | -13 | -7 | 0.37  | 0.55 |
| -5 | -13 | 7  | 0.97  | 0.47 |

5 13 -7 0.63 0.47  
-5 13 7 0.42 0.49  
-4 -13 7 -0.36 0.38  
4 -13 -7 0.18 0.53  
4 -13 -7 1.04 0.52  
-4 13 7 0.06 0.48  
4 13 -7 0.31 0.44  
-3 -13 7 -0.03 0.46  
3 -13 -7 0.48 0.48  
-3 13 7 0.11 0.44  
3 13 -7 0.23 0.46  
3 13 -7 0.40 0.42  
2 -13 -7 -0.31 0.48  
-2 -13 7 -0.32 0.47  
2 13 -7 0.23 0.47  
-2 13 7 0.03 0.47  
2 13 -7 0.62 0.47  
1 -13 -7 1.31 0.54  
-1 -13 7 1.74 0.55  
1 13 -7 0.63 0.48  
-1 13 7 0.80 0.52  
0 -13 -7 0.18 0.60  
0 -13 7 0.07 0.49  
0 13 7 0.42 0.48  
0 13 -7 0.37 0.48  
-1 -13 -7 0.59 0.61  
1 -13 7 -0.08 0.48  
1 13 7 0.18 0.46  
-1 13 -7 0.42 0.47  
2 -13 7 -0.33 0.41  
-2 -13 -7 -1.04 0.59  
-2 13 -7 0.10 0.47  
2 13 7 -0.32 0.37  
3 -13 7 0.99 0.54  
-3 -13 -7 -0.78 0.62  
-3 13 -7 0.23 0.46  
3 13 7 0.10 0.38  
4 13 7 0.23 0.39  
-7 -14 7 0.81 0.53  
-7 -14 7 0.14 0.45  
-7 14 7 -0.46 0.49  
-6 -14 7 -0.20 0.45  
-6 -14 7 0.51 0.51  
6 14 -7 0.15 0.55  
-6 14 7 0.57 0.48  
-5 -14 7 -0.49 0.42



|     |     |    |       |      |
|-----|-----|----|-------|------|
| 5   | 14  | -7 | -0.05 | 0.52 |
| -5  | 14  | 7  | 0.38  | 0.53 |
| -4  | -14 | 7  | 0.35  | 0.52 |
| 4   | 14  | -7 | -0.20 | 0.50 |
| 4   | 14  | -7 | 0.12  | 0.45 |
| -4  | 14  | 7  | 0.04  | 0.45 |
| -3  | -14 | 7  | -0.12 | 0.48 |
| 3   | -14 | -7 | -0.18 | 0.48 |
| -3  | 14  | 7  | -0.03 | 0.52 |
| 3   | 14  | -7 | 0.07  | 0.43 |
| 3   | 14  | -7 | 0.27  | 0.47 |
| -2  | -14 | 7  | -0.20 | 0.49 |
| 2   | -14 | -7 | 0.18  | 0.54 |
| 2   | 14  | -7 | -0.01 | 0.47 |
| -2  | 14  | 7  | 0.88  | 0.52 |
| 2   | 14  | -7 | -0.10 | 0.44 |
| 1   | -14 | -7 | 0.69  | 0.58 |
| -1  | -14 | 7  | 0.64  | 0.52 |
| -1  | 14  | 7  | 0.51  | 0.46 |
| 1   | 14  | -7 | 0.67  | 0.52 |
| 0   | -14 | -7 | -0.24 | 0.60 |
| 0   | -14 | 7  | 0.74  | 0.53 |
| 0   | 14  | -7 | 0.05  | 0.46 |
| 0   | 14  | 7  | -0.03 | 0.45 |
| -1  | -14 | -7 | -1.25 | 0.49 |
| 1   | -14 | 7  | 0.69  | 0.54 |
| 1   | 14  | 7  | 0.21  | 0.46 |
| -1  | 14  | -7 | 0.40  | 0.50 |
| 5   | 15  | -7 | 0.84  | 0.52 |
| 4   | 15  | -7 | 0.09  | 0.53 |
| 4   | 15  | -7 | 0.62  | 0.50 |
| 3   | -15 | -7 | 0.35  | 0.54 |
| 3   | 15  | -7 | 0.53  | 0.49 |
| 3   | 15  | -7 | 1.13  | 0.54 |
| 2   | -15 | -7 | 1.05  | 0.60 |
| 2   | 15  | -7 | -0.01 | 0.50 |
| 1   | -15 | -7 | 0.73  | 0.62 |
| 1   | 15  | -7 | 0.45  | 0.54 |
| -14 | 0   | 8  | 0.04  | 0.43 |
| 14  | 0   | -8 | 0.43  | 0.52 |
| 13  | 0   | -8 | 0.36  | 0.42 |
| -13 | 0   | 8  | -0.05 | 0.40 |
| 13  | 0   | -8 | 0.07  | 0.47 |
| 12  | 0   | -8 | 0.07  | 0.32 |
| -12 | 0   | 8  | 0.08  | 0.43 |
| 12  | 0   | -8 | -0.04 | 0.42 |

|     |   |    |       |      |
|-----|---|----|-------|------|
| -11 | 0 | 8  | 2.06  | 0.45 |
| 11  | 0 | -8 | 1.67  | 0.48 |
| 11  | 0 | -8 | 2.63  | 0.42 |
| -10 | 0 | 8  | 2.72  | 0.49 |
| 10  | 0 | -8 | 4.60  | 0.55 |
| 10  | 0 | -8 | 3.51  | 0.44 |
| 9   | 0 | -8 | 12.92 | 0.77 |
| -9  | 0 | 8  | 12.51 | 0.76 |
| -9  | 0 | 8  | 12.79 | 0.65 |
| -8  | 0 | 8  | 31.65 | 1.01 |
| 8   | 0 | -8 | 28.77 | 1.10 |
| -8  | 0 | 8  | 29.62 | 1.05 |
| 7   | 0 | -8 | 5.05  | 0.74 |
| -7  | 0 | 8  | 4.36  | 0.58 |
| -7  | 0 | 8  | 5.69  | 0.52 |
| 7   | 0 | -8 | 6.10  | 0.57 |
| -7  | 0 | 8  | 5.39  | 0.45 |
| -6  | 0 | 8  | 0.49  | 0.35 |
| 6   | 0 | -8 | 1.43  | 0.40 |
| -6  | 0 | 8  | 1.09  | 0.30 |
| 6   | 0 | -8 | -0.10 | 0.37 |
| -6  | 0 | 8  | 1.04  | 0.34 |
| 5   | 0 | -8 | 32.78 | 1.24 |
| -5  | 0 | 8  | 34.96 | 1.21 |
| -5  | 0 | 8  | 33.39 | 0.97 |
| 5   | 0 | -8 | 32.78 | 1.09 |
| 5   | 0 | -8 | 33.95 | 0.81 |
| -5  | 0 | 8  | 32.49 | 0.80 |
| -5  | 0 | 8  | 35.35 | 1.03 |
| -4  | 0 | 8  | 0.67  | 0.31 |
| 4   | 0 | -8 | 0.26  | 0.32 |
| -4  | 0 | 8  | 0.29  | 0.23 |
| -4  | 0 | 8  | 0.12  | 0.27 |
| 4   | 0 | -8 | 0.27  | 0.29 |
| 3   | 0 | -8 | 45.11 | 1.30 |
| -3  | 0 | 8  | 46.88 | 1.16 |
| 3   | 0 | -8 | 44.79 | 1.45 |
| -2  | 0 | 8  | 0.07  | 0.30 |
| -2  | 0 | 8  | 0.18  | 0.24 |
| 2   | 0 | -8 | -0.18 | 0.27 |
| -2  | 0 | 8  | 0.10  | 0.22 |
| 2   | 0 | -8 | 0.06  | 0.28 |
| -1  | 0 | 8  | 2.90  | 0.33 |
| -1  | 0 | 8  | 3.25  | 0.33 |
| 1   | 0 | -8 | 3.04  | 0.43 |
| 1   | 0 | -8 | 4.33  | 0.48 |

-1 0 8 3.20 0.42  
-1 0 8 3.25 0.36  
0 0 -8 2.19 0.40  
0 0 -8 2.88 0.43  
0 0 8 2.22 0.27  
0 0 -8 2.79 0.29  
0 0 8 2.70 0.43  
-1 0 -8 4.06 0.36  
1 0 8 5.69 0.53  
1 0 8 4.55 0.54  
-1 0 -8 4.75 0.52  
1 0 8 4.60 0.32  
2 0 8 0.84 0.35  
-2 0 -8 0.14 0.26  
2 0 8 0.28 0.42  
-2 0 -8 0.68 0.23  
2 0 8 0.27 0.18  
3 0 8 0.11 0.37  
3 0 8 -0.49 0.40  
-3 0 -8 0.42 0.25  
-3 0 -8 0.71 0.28  
-4 0 -8 -0.04 0.25  
4 0 8 0.12 0.37  
-4 0 -8 -0.13 0.26  
4 0 8 0.31 0.39  
-5 0 -8 2.45 0.37  
5 0 8 3.51 0.54  
5 0 8 3.28 0.61  
-5 0 -8 2.70 0.44  
6 0 8 5.90 0.65  
-6 0 -8 5.61 0.59  
7 0 8 0.26 0.39  
-7 0 -8 0.30 0.35  
-8 0 -8 -0.49 0.41  
8 0 8 0.31 0.47  
9 0 8 0.19 0.49  
-9 0 -8 -0.15 0.48  
14 -1 -8 0.15 0.51  
-14 -1 8 -0.04 0.50  
-14 1 8 0.46 0.45  
14 1 -8 1.18 0.53  
13 -1 -8 -0.34 0.57  
13 -1 -8 -0.17 0.47  
-13 -1 8 0.73 0.51  
13 1 -8 0.31 0.39  
-13 1 8 0.75 0.48

|     |    |    |       |      |
|-----|----|----|-------|------|
| 13  | 1  | -8 | 0.46  | 0.46 |
| 12  | -1 | -8 | 0.49  | 0.39 |
| -12 | -1 | 8  | 0.54  | 0.46 |
| 12  | -1 | -8 | 0.05  | 0.44 |
| 12  | 1  | -8 | -0.31 | 0.31 |
| 12  | 1  | -8 | -0.35 | 0.40 |
| -12 | 1  | 8  | -0.10 | 0.35 |
| 11  | -1 | -8 | 2.44  | 0.46 |
| -11 | -1 | 8  | 2.12  | 0.50 |
| 11  | -1 | -8 | 1.42  | 0.50 |
| -11 | 1  | 8  | 2.00  | 0.44 |
| 11  | 1  | -8 | 2.28  | 0.44 |
| 11  | 1  | -8 | 1.43  | 0.47 |
| -10 | -1 | 8  | 0.51  | 0.41 |
| 10  | -1 | -8 | 0.59  | 0.44 |
| 10  | 1  | -8 | 0.46  | 0.40 |
| -10 | 1  | 8  | 0.21  | 0.37 |
| 10  | 1  | -8 | 0.00  | 0.30 |
| -10 | 1  | 8  | 0.79  | 0.36 |
| -9  | -1 | 8  | 15.03 | 0.81 |
| 9   | -1 | -8 | 14.22 | 0.82 |
| -9  | 1  | 8  | 16.32 | 0.81 |
| -9  | 1  | 8  | 14.33 | 0.69 |
| 9   | 1  | -8 | 14.16 | 0.70 |
| 9   | 1  | -8 | 14.67 | 0.77 |
| -8  | -1 | 8  | 3.70  | 0.67 |
| 8   | -1 | -8 | 3.37  | 0.50 |
| -8  | -1 | 8  | 4.31  | 0.51 |
| 8   | 1  | -8 | 3.80  | 0.48 |
| -8  | 1  | 8  | 3.34  | 0.39 |
| -8  | 1  | 8  | 3.73  | 0.47 |
| -7  | -1 | 8  | 0.50  | 0.39 |
| -7  | -1 | 8  | 0.32  | 0.36 |
| 7   | -1 | -8 | 0.44  | 0.38 |
| -7  | -1 | 8  | 0.66  | 0.29 |
| -7  | 1  | 8  | 0.39  | 0.27 |
| -7  | 1  | 8  | 0.28  | 0.33 |
| 7   | 1  | -8 | 0.42  | 0.39 |
| 7   | 1  | -8 | 0.53  | 0.38 |
| -6  | -1 | 8  | 14.23 | 0.70 |
| 6   | -1 | -8 | 14.60 | 0.77 |
| 6   | -1 | -8 | 12.90 | 0.86 |
| -6  | -1 | 8  | 13.32 | 0.61 |
| -6  | -1 | 8  | 13.89 | 0.78 |
| -6  | 1  | 8  | 13.67 | 0.66 |
| -6  | 1  | 8  | 13.65 | 0.61 |

|    |    |    |       |      |
|----|----|----|-------|------|
| 6  | 1  | -8 | 15.28 | 0.85 |
| -6 | 1  | 8  | 12.93 | 0.83 |
| 6  | 1  | -8 | 12.53 | 0.72 |
| -5 | -1 | 8  | 1.68  | 0.32 |
| 5  | -1 | -8 | 2.04  | 0.46 |
| 5  | -1 | -8 | 1.84  | 0.42 |
| 5  | -1 | -8 | 1.63  | 0.17 |
| -5 | -1 | 8  | 1.68  | 0.36 |
| -5 | -1 | 8  | 1.79  | 0.36 |
| -5 | -1 | 8  | 1.94  | 0.22 |
| 5  | 1  | -8 | 0.98  | 0.36 |
| 5  | 1  | -8 | 1.86  | 0.37 |
| -5 | 1  | 8  | 1.62  | 0.29 |
| -5 | 1  | 8  | 2.77  | 0.35 |
| -5 | 1  | 8  | 1.61  | 0.37 |
| -4 | -1 | 8  | 42.72 | 1.04 |
| -4 | -1 | 8  | 41.64 | 1.16 |
| 4  | -1 | -8 | 42.57 | 1.27 |
| -4 | -1 | 8  | 41.10 | 1.31 |
| 4  | -1 | -8 | 43.23 | 1.47 |
| -4 | -1 | 8  | 42.43 | 1.11 |
| 4  | -1 | -8 | 43.23 | 1.03 |
| 4  | 1  | -8 | 42.10 | 1.37 |
| -4 | 1  | 8  | 41.35 | 1.11 |
| 4  | 1  | -8 | 41.10 | 1.22 |
| -4 | 1  | 8  | 44.14 | 1.41 |
| -3 | -1 | 8  | 19.29 | 0.71 |
| -3 | -1 | 8  | 18.93 | 0.62 |
| 3  | -1 | -8 | 19.04 | 0.80 |
| 3  | -1 | -8 | 17.87 | 0.60 |
| -3 | -1 | 8  | 19.47 | 0.66 |
| 3  | -1 | -8 | 16.95 | 0.88 |
| -3 | 1  | 8  | 18.45 | 0.64 |
| 3  | 1  | -8 | 18.54 | 0.85 |
| 3  | 1  | -8 | 18.20 | 0.75 |
| -3 | 1  | 8  | 18.84 | 0.86 |
| 3  | 1  | -8 | 18.24 | 0.81 |
| -3 | 1  | 8  | 18.93 | 0.67 |
| -2 | -1 | 8  | 30.84 | 0.97 |
| 2  | -1 | -8 | 30.19 | 1.13 |
| -2 | -1 | 8  | 31.34 | 0.94 |
| 2  | -1 | -8 | 33.03 | 1.18 |
| -2 | -1 | 8  | 31.66 | 0.86 |
| 2  | -1 | -8 | 31.94 | 0.90 |
| -2 | 1  | 8  | 31.89 | 1.02 |
| 2  | 1  | -8 | 31.78 | 1.09 |

-2 1 8 30.96 0.87  
2 1 -8 30.72 1.10  
-2 1 8 32.34 0.89  
1 -1 -8 29.80 1.14  
1 -1 -8 32.31 1.15  
-1 -1 8 29.41 0.95  
-1 -1 8 30.25 0.93  
1 -1 -8 29.90 0.91  
-1 1 8 28.89 0.92  
-1 1 8 28.95 1.00  
-1 1 8 31.22 0.84  
-1 1 8 28.80 0.83  
1 1 -8 29.45 1.08  
1 1 -8 29.69 1.10  
0 -1 8 1.34 0.31  
0 -1 -8 1.74 0.23  
0 -1 -8 1.23 0.35  
0 -1 -8 1.78 0.31  
0 -1 -8 1.73 0.40  
0 -1 8 1.83 0.36  
0 -1 8 2.27 0.26  
0 1 -8 1.59 0.27  
0 1 8 1.67 0.41  
0 1 -8 1.25 0.35  
0 1 -8 1.02 0.33  
0 1 8 1.53 0.37  
-1 -1 -8 3.78 0.42  
-1 -1 -8 4.30 0.32  
-1 -1 -8 3.38 0.48  
1 -1 8 4.36 0.49  
1 -1 8 3.98 0.29  
1 -1 8 3.94 0.46  
1 -1 8 3.75 0.51  
1 1 8 4.73 0.33  
1 1 8 4.06 0.49  
-1 1 -8 3.62 0.36  
-1 1 -8 4.30 0.51  
1 1 8 4.43 0.51  
-2 -1 -8 9.23 0.45  
-2 -1 -8 10.34 0.62  
2 -1 8 9.16 0.60  
2 -1 8 9.14 0.66  
2 1 8 9.82 0.43  
2 1 8 10.12 0.66  
-2 1 -8 9.79 0.54  
2 1 8 10.74 0.70

3 -1 8 0.98 0.36  
3 -1 8 -0.06 0.31  
-3 -1 -8 0.40 0.23  
-3 -1 -8 0.98 0.32  
3 1 8 1.24 0.43  
-3 1 -8 1.22 0.30  
3 1 8 0.88 0.43  
4 -1 8 2.70 0.50  
4 -1 8 1.62 0.45  
-4 -1 -8 1.83 0.40  
-4 -1 -8 1.52 0.30  
-4 1 -8 1.69 0.34  
-4 1 -8 1.77 0.36  
4 1 8 1.94 0.46  
-5 -1 -8 1.03 0.39  
5 -1 8 0.52 0.40  
5 -1 8 0.33 0.41  
5 1 8 0.88 0.43  
-5 1 -8 0.79 0.36  
-5 1 -8 0.73 0.29  
6 -1 8 0.29 0.42  
6 -1 8 -0.09 0.36  
-6 -1 -8 0.32 0.34  
-6 1 -8 0.09 0.31  
-6 1 -8 0.08 0.30  
6 1 8 0.81 0.44  
7 -1 8 1.15 0.58  
-7 -1 -8 1.60 0.47  
7 -1 8 2.20 0.53  
7 1 8 1.39 0.48  
-7 1 -8 1.27 0.38  
-7 1 -8 1.46 0.43  
-8 -1 -8 -0.39 0.41  
8 -1 8 0.00 0.45  
8 1 8 -0.09 0.45  
-8 1 -8 0.22 0.39  
-9 -1 -8 0.13 0.49  
9 -1 8 0.55 0.51  
9 1 8 0.77 0.54  
-9 1 -8 0.44 0.50  
14 -2 -8 -0.55 0.50  
-14 -2 8 0.03 0.45  
-14 2 8 -0.37 0.48  
14 2 -8 0.37 0.51  
-13 -2 8 1.21 0.54  
13 -2 -8 1.56 0.54

|     |    |    |       |      |
|-----|----|----|-------|------|
| 13  | 2  | -8 | 0.20  | 0.44 |
| 13  | 2  | -8 | 0.87  | 0.48 |
| -13 | 2  | 8  | 0.28  | 0.41 |
| 12  | -2 | -8 | 1.00  | 0.49 |
| 12  | -2 | -8 | 0.72  | 0.40 |
| -12 | -2 | 8  | 0.78  | 0.42 |
| 12  | 2  | -8 | 1.19  | 0.44 |
| -12 | 2  | 8  | 0.35  | 0.37 |
| 12  | 2  | -8 | 0.45  | 0.37 |
| -11 | -2 | 8  | 0.79  | 0.39 |
| 11  | -2 | -8 | 1.42  | 0.46 |
| 11  | 2  | -8 | 0.88  | 0.36 |
| -11 | 2  | 8  | 1.15  | 0.36 |
| -11 | 2  | 8  | 1.31  | 0.44 |
| 11  | 2  | -8 | 1.11  | 0.42 |
| -10 | -2 | 8  | 2.19  | 0.49 |
| 10  | -2 | -8 | 1.86  | 0.46 |
| -10 | 2  | 8  | 1.78  | 0.43 |
| 10  | 2  | -8 | 2.01  | 0.44 |
| 10  | 2  | -8 | 1.72  | 0.41 |
| -10 | 2  | 8  | 1.86  | 0.41 |
| -9  | -2 | 8  | 0.46  | 0.35 |
| 9   | -2 | -8 | 0.29  | 0.37 |
| -9  | 2  | 8  | 0.50  | 0.34 |
| 9   | 2  | -8 | 0.62  | 0.35 |
| -9  | 2  | 8  | 0.56  | 0.33 |
| 9   | 2  | -8 | 0.08  | 0.29 |
| -8  | -2 | 8  | 14.88 | 0.92 |
| -8  | -2 | 8  | 15.66 | 0.77 |
| 8   | -2 | -8 | 14.79 | 0.86 |
| 8   | 2  | -8 | 15.69 | 0.71 |
| -8  | 2  | 8  | 16.13 | 0.76 |
| 8   | 2  | -8 | 16.09 | 0.76 |
| 8   | 2  | -8 | 15.02 | 0.84 |
| -8  | 2  | 8  | 14.72 | 0.68 |
| -7  | -2 | 8  | 1.35  | 0.42 |
| 7   | -2 | -8 | 0.96  | 0.44 |
| -7  | -2 | 8  | 1.39  | 0.39 |
| 7   | 2  | -8 | 0.97  | 0.37 |
| 7   | 2  | -8 | 0.80  | 0.39 |
| -7  | 2  | 8  | 1.04  | 0.34 |
| 7   | 2  | -8 | 1.23  | 0.33 |
| -7  | 2  | 8  | 1.62  | 0.32 |
| -6  | -2 | 8  | 5.20  | 0.52 |
| -6  | -2 | 8  | 4.76  | 0.50 |
| 6   | -2 | -8 | 6.22  | 0.61 |



6 2 -8 5.35 0.55  
-6 2 8 5.19 0.47  
-6 2 8 6.59 0.67  
-6 2 8 4.82 0.43  
6 2 -8 6.12 0.51  
-5 -2 8 0.01 0.23  
5 -2 -8 -0.21 0.37  
-5 -2 8 -0.43 0.25  
5 -2 -8 0.12 0.14  
-5 -2 8 0.21 0.32  
5 -2 -8 0.25 0.37  
-5 -2 8 0.08 0.18  
-5 2 8 0.43 0.33  
5 2 -8 -0.43 0.31  
5 2 -8 0.36 0.31  
-5 2 8 0.20 0.24  
4 -2 -8 -0.02 0.35  
-4 -2 8 0.51 0.22  
-4 -2 8 0.30 0.24  
-4 -2 8 0.56 0.29  
-4 -2 8 0.73 0.28  
4 -2 -8 0.22 0.16  
4 -2 -8 0.73 0.36  
-4 2 8 0.28 0.32  
-4 2 8 0.38 0.23  
4 2 -8 0.09 0.27  
4 2 -8 0.00 0.28  
-4 2 8 0.14 0.24  
3 -2 -8 15.71 0.73  
3 -2 -8 15.64 0.85  
-3 -2 8 15.68 0.69  
3 -2 -8 15.91 0.55  
-3 -2 8 16.36 0.59  
3 2 -8 15.08 0.67  
-3 2 8 15.94 0.82  
3 2 -8 15.71 0.73  
-3 2 8 16.46 0.61  
-3 2 8 16.42 0.57  
3 2 -8 15.91 0.78  
-2 -2 8 4.13 0.36  
-2 -2 8 4.74 0.44  
2 -2 -8 5.16 0.37  
-2 -2 8 3.70 0.32  
2 -2 -8 4.36 0.50  
2 -2 -8 3.14 0.46  
-2 2 8 4.38 0.38

-2 2 8 4.19 0.31  
2 2 -8 4.20 0.45  
2 2 -8 4.74 0.45  
-2 2 8 4.78 0.47  
-1 -2 8 12.83 0.71  
1 -2 -8 13.01 0.58  
1 -2 -8 13.07 0.77  
-1 -2 8 11.32 0.56  
1 -2 -8 12.18 0.77  
-1 -2 8 12.17 0.61  
1 2 -8 13.20 0.70  
-1 2 8 13.01 0.55  
-1 2 8 11.94 0.68  
-1 2 8 13.38 0.48  
1 2 -8 12.77 0.68  
0 -2 -8 21.84 1.00  
0 -2 -8 21.27 0.61  
0 -2 8 19.80 0.61  
0 -2 -8 19.78 0.77  
0 -2 8 20.49 0.80  
0 -2 -8 22.55 1.13  
0 -2 8 21.46 0.82  
0 2 -8 20.55 0.90  
0 2 8 20.49 0.83  
0 2 -8 20.04 0.75  
1 -2 8 12.57 0.45  
-1 -2 -8 11.75 0.44  
1 -2 8 10.64 0.62  
-1 -2 -8 13.22 0.66  
1 -2 8 13.36 0.70  
1 -2 8 13.96 0.81  
-1 2 -8 12.97 0.62  
-1 2 -8 12.22 0.73  
1 2 8 12.71 0.51  
1 2 8 13.30 0.74  
2 -2 8 3.37 0.47  
-2 -2 -8 3.57 0.38  
-2 -2 -8 3.09 0.41  
2 -2 8 3.78 0.49  
-2 2 -8 3.90 0.52  
2 2 8 3.59 0.32  
2 2 8 3.82 0.51  
-2 2 -8 3.37 0.39  
-3 -2 -8 4.05 0.46  
3 -2 8 5.07 0.54  
3 -2 8 5.21 0.55

3 2 8 3.58 0.51  
-3 2 -8 4.69 0.44  
4 -2 8 8.89 0.67  
4 -2 8 8.23 0.67  
-4 -2 -8 8.60 0.67  
-4 2 -8 8.28 0.57  
4 2 8 8.12 0.69  
-5 -2 -8 3.20 0.47  
5 -2 8 3.83 0.53  
-5 2 -8 2.50 0.41  
5 2 8 2.19 0.49  
6 -2 8 0.60 0.40  
-6 -2 -8 0.30 0.32  
6 -2 8 0.28 0.47  
6 2 8 0.97 0.45  
-6 2 -8 0.69 0.34  
-6 2 -8 0.47 0.33  
7 -2 8 -0.46 0.41  
7 -2 8 0.72 0.49  
-7 -2 -8 0.22 0.35  
-7 2 -8 0.20 0.38  
7 2 8 0.35 0.44  
-7 2 -8 -0.08 0.36  
8 -2 8 0.17 0.47  
8 -2 8 -0.62 0.55  
-8 -2 -8 -0.14 0.43  
-8 2 -8 -0.16 0.43  
-8 2 -8 -0.72 0.38  
8 2 8 0.38 0.48  
-9 -2 -8 -0.18 0.46  
9 -2 8 0.22 0.49  
9 2 8 -0.33 0.48  
-9 2 -8 -0.26 0.45  
-14 -3 8 0.41 0.51  
14 -3 -8 -0.06 0.51  
-14 3 8 0.22 0.49  
-13 -3 8 0.17 0.43  
13 -3 -8 -0.14 0.47  
-13 3 8 0.68 0.49  
13 3 -8 -0.30 0.44  
-12 -3 8 0.93 0.49  
12 -3 -8 2.22 0.58  
-12 3 8 0.22 0.37  
12 3 -8 1.21 0.56  
12 3 -8 0.29 0.37  
-12 3 8 0.85 0.37

-11 -3 8 0.56 0.39  
11 -3 -8 1.87 0.51  
-11 3 8 0.58 0.33  
11 3 -8 0.89 0.39  
11 3 -8 0.78 0.41  
-11 3 8 0.09 0.37  
10 -3 -8 0.99 0.46  
-10 -3 8 1.11 0.45  
10 3 -8 0.73 0.36  
-10 3 8 0.86 0.37  
-10 3 8 1.03 0.35  
10 3 -8 1.51 0.41  
-9 -3 8 4.38 0.56  
9 -3 -8 4.16 0.59  
-9 3 8 5.35 0.53  
9 3 -8 4.48 0.48  
-9 3 8 5.28 0.52  
9 3 -8 4.61 0.48  
-8 -3 8 2.20 0.41  
8 -3 -8 2.35 0.50  
-8 -3 8 1.61 0.45  
8 3 -8 1.66 0.43  
8 3 -8 1.97 0.38  
-8 3 8 3.45 0.43  
-8 3 8 2.11 0.38  
8 3 -8 1.40 0.35  
-7 -3 8 6.08 0.55  
-7 -3 8 6.36 0.58  
7 -3 -8 6.58 0.64  
7 3 -8 5.94 0.51  
7 3 -8 5.82 0.54  
7 3 -8 6.98 0.52  
-7 3 8 6.33 0.50  
-7 3 8 5.82 0.49  
-6 -3 8 10.37 0.67  
6 -3 -8 10.35 0.75  
-6 -3 8 9.93 0.66  
-6 -3 8 9.86 0.43  
6 3 -8 9.98 0.57  
6 3 -8 12.26 0.72  
6 3 -8 9.91 0.60  
-6 3 8 9.71 0.58  
-5 -3 8 2.48 0.27  
-5 -3 8 2.24 0.39  
5 -3 -8 2.67 0.48  
5 -3 -8 2.35 0.24

-5 -3 8 2.45 0.36  
5 3 -8 2.27 0.35  
-5 3 8 2.67 0.44  
5 3 -8 2.33 0.39  
5 3 -8 2.56 0.36  
-5 3 8 1.83 0.31  
-5 3 8 2.47 0.32  
-4 -3 8 -0.19 0.27  
4 -3 -8 -0.02 0.18  
-4 -3 8 0.00 0.23  
4 -3 -8 -0.37 0.34  
4 -3 -8 0.22 0.36  
-4 3 8 0.03 0.23  
-4 3 8 0.16 0.21  
4 3 -8 -0.16 0.26  
4 3 -8 -0.02 0.28  
-4 3 8 0.13 0.31  
4 3 -8 -0.44 0.26  
3 -3 -8 9.01 0.67  
-3 -3 8 7.82 0.57  
3 -3 -8 7.52 0.42  
3 -3 -8 8.64 0.71  
-3 3 8 8.36 0.41  
3 3 -8 7.63 0.49  
-3 3 8 7.89 0.46  
-3 3 8 8.85 0.66  
3 3 -8 8.68 0.47  
3 3 -8 7.95 0.55  
3 3 -8 8.64 0.54  
2 -3 -8 16.82 0.62  
-2 -3 8 17.79 0.75  
-2 -3 8 16.60 0.66  
2 -3 -8 17.24 0.88  
-2 -3 8 16.85 0.67  
2 -3 -8 17.35 0.91  
2 3 -8 16.51 0.76  
2 3 -8 17.13 0.61  
2 3 -8 17.24 0.75  
-2 3 8 17.63 0.64  
-2 3 8 17.49 0.54  
-2 3 8 16.83 0.79  
1 -3 -8 50.25 2.12  
1 -3 -8 49.12 1.30  
1 -3 -8 48.84 1.59  
-1 -3 8 47.18 1.32  
-1 -3 8 48.51 1.34

-1 -3 8 50.47 1.30  
1 -3 -8 51.61 1.11  
1 3 -8 46.83 1.44  
1 3 -8 49.07 1.42  
-1 3 8 47.78 1.21  
-1 3 8 47.21 1.39  
1 3 -8 48.76 1.18  
0 -3 8 2.08 0.35  
0 -3 -8 2.56 0.33  
0 3 -8 2.22 0.36  
0 3 8 2.41 0.32  
0 3 -8 2.66 0.39  
0 3 8 1.36 0.36  
0 3 -8 2.68 0.27  
-1 -3 -8 0.11 0.25  
1 -3 8 0.52 0.32  
1 -3 8 0.08 0.34  
1 -3 8 0.19 0.33  
-1 3 -8 -0.04 0.28  
-1 3 -8 0.18 0.30  
1 3 8 0.58 0.37  
-1 3 -8 0.33 0.17  
2 -3 8 2.26 0.43  
2 -3 8 2.12 0.42  
-2 -3 -8 2.16 0.40  
2 3 8 2.56 0.31  
-2 3 -8 2.07 0.37  
2 3 8 2.67 0.46  
-2 3 -8 2.50 0.44  
3 -3 8 -0.03 0.33  
-3 -3 -8 0.35 0.30  
3 -3 8 0.01 0.32  
3 3 8 0.60 0.39  
3 3 8 0.39 0.21  
-3 3 -8 0.20 0.28  
4 -3 8 1.15 0.41  
-4 -3 -8 0.70 0.31  
4 -3 8 0.40 0.37  
4 3 8 0.11 0.34  
-4 3 -8 0.70 0.33  
5 -3 8 0.52 0.39  
5 -3 8 -0.04 0.37  
-5 -3 -8 0.23 0.32  
5 3 8 0.19 0.41  
-5 3 -8 0.27 0.33  
6 -3 8 0.44 0.41

-6 -3 -8 0.18 0.32  
6 -3 8 0.99 0.41  
-6 3 -8 0.29 0.35  
6 3 8 0.31 0.39  
7 -3 8 0.04 0.42  
7 -3 8 0.48 0.53  
-7 -3 -8 0.01 0.40  
-7 3 -8 0.02 0.37  
7 3 8 0.53 0.46  
-7 3 -8 0.71 0.37  
8 -3 8 0.59 0.61  
8 -3 8 0.66 0.48  
-8 -3 -8 -0.16 0.44  
-8 3 -8 1.17 0.48  
8 3 8 0.22 0.47  
-8 3 -8 0.15 0.42  
9 -3 8 -0.15 0.50  
9 -3 8 -0.76 0.59  
-9 -3 -8 -0.10 0.50  
-9 3 -8 0.37 0.46  
-9 3 -8 0.24 0.46  
14 4 -8 -0.43 0.46  
13 -4 -8 -0.22 0.45  
-13 -4 8 0.23 0.51  
13 4 -8 0.12 0.42  
-13 4 8 0.35 0.46  
-12 -4 8 0.43 0.47  
12 -4 -8 -0.02 0.50  
-12 4 8 0.37 0.41  
-12 4 8 -0.15 0.37  
12 4 -8 0.00 0.42  
-11 -4 8 -0.18 0.37  
11 -4 -8 0.34 0.44  
-11 4 8 0.20 0.35  
-11 4 8 -0.65 0.31  
11 4 -8 -0.07 0.34  
10 -4 -8 0.25 0.43  
-10 -4 8 0.43 0.36  
10 4 -8 0.38 0.37  
-10 4 8 -0.15 0.32  
-10 4 8 0.10 0.33  
-9 -4 8 1.12 0.42  
9 -4 -8 1.15 0.43  
9 4 -8 1.40 0.36  
-9 4 8 1.31 0.37  
-9 4 8 1.62 0.39

|    |    |    |       |      |
|----|----|----|-------|------|
| 8  | -4 | -8 | 13.30 | 0.85 |
| -8 | -4 | 8  | 12.21 | 0.72 |
| -8 | 4  | 8  | 12.84 | 0.69 |
| -8 | 4  | 8  | 12.08 | 0.65 |
| 8  | 4  | -8 | 11.67 | 0.61 |
| 8  | 4  | -8 | 12.14 | 0.66 |
| -7 | -4 | 8  | 8.41  | 0.62 |
| 7  | -4 | -8 | 10.46 | 0.72 |
| 7  | 4  | -8 | 9.10  | 0.53 |
| -7 | 4  | 8  | 10.11 | 0.57 |
| -7 | 4  | 8  | 10.11 | 0.58 |
| 7  | 4  | -8 | 9.47  | 0.58 |
| -6 | -4 | 8  | 7.39  | 0.59 |
| 6  | -4 | -8 | 8.06  | 0.70 |
| -6 | -4 | 8  | 8.61  | 0.44 |
| -6 | -4 | 8  | 8.59  | 0.64 |
| 6  | 4  | -8 | 8.83  | 0.59 |
| 6  | 4  | -8 | 7.43  | 0.50 |
| -6 | 4  | 8  | 7.53  | 0.52 |
| 6  | 4  | -8 | 6.92  | 0.54 |
| -6 | 4  | 8  | 9.10  | 0.54 |
| -5 | -4 | 8  | 9.12  | 0.65 |
| 5  | -4 | -8 | 8.76  | 0.70 |
| 5  | -4 | -8 | 8.84  | 0.45 |
| -5 | -4 | 8  | 7.97  | 0.45 |
| -5 | -4 | 8  | 7.94  | 0.53 |
| 5  | 4  | -8 | 8.76  | 0.57 |
| 5  | 4  | -8 | 7.87  | 0.49 |
| -5 | 4  | 8  | 8.73  | 0.48 |
| -5 | 4  | 8  | 8.02  | 0.51 |
| 5  | 4  | -8 | 8.39  | 0.52 |
| 4  | -4 | -8 | 7.92  | 0.65 |
| 4  | -4 | -8 | 6.09  | 0.40 |
| -4 | -4 | 8  | 6.60  | 0.43 |
| -4 | -4 | 8  | 6.58  | 0.57 |
| 4  | 4  | -8 | 6.16  | 0.46 |
| -4 | 4  | 8  | 5.57  | 0.45 |
| -4 | 4  | 8  | 6.28  | 0.38 |
| 4  | 4  | -8 | 6.24  | 0.44 |
| 4  | 4  | -8 | 6.07  | 0.47 |
| 4  | 4  | -8 | 6.36  | 0.49 |
| 3  | -4 | -8 | 4.84  | 0.38 |
| 3  | -4 | -8 | 5.23  | 0.56 |
| -3 | -4 | 8  | 4.23  | 0.47 |
| -3 | -4 | 8  | 4.64  | 0.41 |
| 3  | 4  | -8 | 4.22  | 0.41 |



3 4 -8 5.06 0.39  
-3 4 8 4.72 0.41  
3 4 -8 4.52 0.39  
3 4 -8 4.83 0.40  
-3 4 8 5.13 0.57  
-3 4 8 4.89 0.32  
-2 -4 8 16.74 0.67  
2 -4 -8 16.57 0.66  
-2 -4 8 18.02 0.64  
-2 -4 8 17.73 0.78  
2 -4 -8 16.83 0.91  
-2 4 8 16.78 0.82  
2 4 -8 19.00 0.72  
-2 4 8 18.37 0.67  
2 4 -8 17.32 0.75  
2 4 -8 16.73 0.64  
-1 -4 8 2.46 0.42  
-1 -4 8 2.56 0.34  
-1 -4 8 1.80 0.37  
1 -4 -8 2.57 0.36  
1 4 -8 2.57 0.29  
-1 4 8 3.06 0.34  
-1 4 8 2.17 0.43  
1 4 -8 2.17 0.35  
1 4 -8 2.04 0.33  
0 -4 8 16.78 0.69  
0 -4 -8 16.69 0.72  
0 -4 8 17.65 0.77  
0 4 -8 17.32 0.58  
0 4 -8 17.31 0.77  
0 4 -8 15.32 0.70  
0 4 8 16.28 0.83  
0 4 8 17.04 0.66  
1 -4 8 2.03 0.40  
1 -4 8 3.05 0.49  
-1 -4 -8 2.89 0.41  
1 -4 8 3.27 0.61  
-1 4 -8 2.83 0.41  
-1 4 -8 2.46 0.27  
1 4 8 2.51 0.48  
-1 4 -8 2.85 0.42  
1 4 8 2.86 0.32  
2 -4 8 11.68 0.66  
-2 -4 -8 12.55 0.65  
2 -4 8 11.29 0.79  
2 -4 8 12.04 0.87

|     |    |    |       |      |
|-----|----|----|-------|------|
| 2   | 4  | 8  | 12.87 | 0.72 |
| -2  | 4  | -8 | 12.00 | 0.67 |
| -2  | 4  | -8 | 10.19 | 0.71 |
| -3  | -4 | -8 | 2.38  | 0.39 |
| 3   | -4 | 8  | 1.92  | 0.40 |
| 3   | -4 | 8  | 2.61  | 0.43 |
| -3  | 4  | -8 | 2.18  | 0.38 |
| 3   | 4  | 8  | 2.45  | 0.30 |
| 3   | 4  | 8  | 1.25  | 0.40 |
| 4   | -4 | 8  | 2.77  | 0.48 |
| 4   | -4 | 8  | 2.72  | 0.46 |
| -4  | -4 | -8 | 3.58  | 0.50 |
| 4   | 4  | 8  | 2.77  | 0.52 |
| -4  | 4  | -8 | 3.08  | 0.45 |
| 5   | -4 | 8  | 1.15  | 0.42 |
| 5   | -4 | 8  | 0.21  | 0.40 |
| -5  | -4 | -8 | 0.42  | 0.33 |
| 5   | 4  | 8  | 1.05  | 0.44 |
| -5  | 4  | -8 | 0.48  | 0.37 |
| 6   | -4 | 8  | 1.56  | 0.47 |
| 6   | -4 | 8  | 0.57  | 0.41 |
| -6  | -4 | -8 | -0.19 | 0.34 |
| 6   | 4  | 8  | 0.46  | 0.46 |
| -6  | 4  | -8 | 0.07  | 0.37 |
| 7   | -4 | 8  | 0.85  | 0.43 |
| -7  | -4 | -8 | 0.21  | 0.42 |
| 7   | -4 | 8  | 0.90  | 0.47 |
| -7  | 4  | -8 | 0.58  | 0.43 |
| 7   | 4  | 8  | 0.70  | 0.45 |
| 8   | -4 | 8  | -0.27 | 0.45 |
| 8   | -4 | 8  | 0.73  | 0.54 |
| -8  | -4 | -8 | -0.13 | 0.47 |
| -8  | 4  | -8 | 0.42  | 0.45 |
| 8   | 4  | 8  | 0.20  | 0.50 |
| -8  | 4  | -8 | 0.06  | 0.44 |
| 9   | -4 | 8  | 0.35  | 0.65 |
| 9   | -4 | 8  | 0.36  | 0.57 |
| -9  | 4  | -8 | -0.14 | 0.46 |
| -9  | 4  | -8 | 0.91  | 0.52 |
| 14  | 5  | -8 | -0.06 | 0.50 |
| 13  | -5 | -8 | 1.17  | 0.58 |
| -13 | -5 | 8  | 0.53  | 0.50 |
| 13  | 5  | -8 | 0.46  | 0.43 |
| -13 | 5  | 8  | 0.09  | 0.44 |
| 12  | -5 | -8 | 0.41  | 0.48 |
| -12 | -5 | 8  | 0.90  | 0.52 |

-12 5 8 1.14 0.45  
12 5 -8 1.11 0.50  
-12 5 8 0.44 0.39  
11 -5 -8 1.20 0.49  
-11 -5 8 0.88 0.46  
11 5 -8 0.09 0.37  
-11 5 8 0.62 0.40  
-11 5 8 0.70 0.41  
10 -5 -8 0.17 0.45  
-10 -5 8 0.07 0.41  
-10 5 8 0.21 0.34  
10 5 -8 0.20 0.37  
-10 5 8 0.10 0.30  
9 -5 -8 2.63 0.54  
-9 -5 8 1.86 0.43  
9 5 -8 2.11 0.41  
-9 5 8 2.20 0.39  
-9 5 8 2.35 0.45  
8 -5 -8 0.94 0.45  
-8 -5 8 1.23 0.38  
-8 5 8 0.45 0.29  
-8 5 8 0.27 0.30  
8 5 -8 1.43 0.39  
7 -5 -8 3.46 0.54  
-7 -5 8 4.24 0.50  
-7 5 8 3.97 0.44  
7 5 -8 3.17 0.45  
6 -5 -8 7.13 0.67  
-6 -5 8 5.95 0.42  
-6 -5 8 4.63 0.51  
6 5 -8 5.85 0.50  
-6 5 8 5.62 0.44  
-6 5 8 5.87 0.49  
-5 -5 8 4.61 0.50  
-5 -5 8 5.01 0.41  
5 -5 -8 4.62 0.55  
5 -5 -8 5.19 0.45  
-5 5 8 5.23 0.39  
5 5 -8 5.12 0.47  
-5 5 8 4.70 0.45  
4 -5 -8 0.14 0.27  
4 -5 -8 0.22 0.35  
-4 -5 8 -0.31 0.30  
-4 5 8 0.26 0.20  
-4 5 8 0.15 0.25  
4 5 -8 -0.32 0.25

-3 -5 8 7.73 0.52  
3 -5 -8 6.51 0.61  
3 -5 -8 6.51 0.49  
-3 -5 8 6.21 0.54  
3 5 -8 6.14 0.40  
3 5 -8 7.58 0.51  
3 5 -8 6.84 0.44  
-3 5 8 7.52 0.48  
3 5 -8 6.34 0.48  
-2 -5 8 1.86 0.42  
2 -5 -8 1.99 0.34  
-2 -5 8 1.72 0.33  
-2 -5 8 2.67 0.30  
2 5 -8 2.09 0.29  
2 5 -8 2.10 0.32  
-2 5 8 1.89 0.32  
2 5 -8 2.33 0.33  
-1 -5 8 9.91 0.62  
-1 -5 8 10.60 0.63  
1 -5 -8 9.87 0.55  
-1 -5 8 10.13 0.51  
-1 5 8 10.53 0.56  
1 5 -8 10.46 0.49  
-1 5 8 9.99 0.69  
1 5 -8 9.74 0.56  
1 5 -8 9.18 0.58  
0 -5 8 12.52 0.60  
0 -5 8 12.41 0.70  
0 -5 -8 10.97 0.60  
0 5 -8 11.98 0.68  
0 5 -8 11.56 0.48  
0 5 8 13.49 0.61  
0 5 -8 11.04 0.63  
0 5 8 10.26 0.67  
-1 -5 -8 14.36 0.69  
1 -5 8 13.76 0.70  
1 -5 8 13.99 0.76  
1 -5 8 14.34 0.67  
-1 5 -8 13.35 0.72  
1 5 8 13.38 0.78  
-1 5 -8 13.29 0.69  
1 5 8 16.05 0.62  
-2 -5 -8 1.07 0.33  
2 -5 8 1.46 0.36  
2 -5 8 0.97 0.37  
2 -5 8 1.29 0.38

2 5 8 1.22 0.39  
-2 5 -8 0.71 0.36  
2 5 8 1.28 0.28  
-2 5 -8 1.10 0.34  
3 -5 8 0.14 0.37  
-3 -5 -8 0.71 0.32  
3 5 8 0.44 0.37  
3 5 8 0.34 0.26  
-3 5 -8 0.37 0.32  
4 -5 8 1.12 0.38  
4 -5 8 0.88 0.41  
-4 -5 -8 1.19 0.37  
-4 5 -8 0.97 0.38  
4 5 8 1.29 0.46  
5 -5 8 3.07 0.53  
5 -5 8 3.34 0.52  
-5 -5 -8 2.53 0.46  
-5 5 -8 2.53 0.49  
5 5 8 2.31 0.51  
6 -5 8 1.16 0.46  
-6 -5 -8 0.55 0.42  
6 -5 8 0.48 0.39  
6 5 8 0.21 0.45  
-6 5 -8 0.86 0.38  
-7 -5 -8 0.05 0.45  
7 -5 8 0.74 0.46  
7 -5 8 -0.27 0.44  
-7 5 -8 -0.56 0.37  
7 5 8 0.01 0.47  
-8 -5 -8 -0.39 0.47  
8 -5 8 0.11 0.50  
8 5 8 0.27 0.51  
-8 5 -8 0.12 0.44  
-13 -6 8 0.45 0.52  
13 -6 -8 0.21 0.55  
-13 6 8 0.10 0.46  
13 6 -8 0.41 0.46  
-12 -6 8 0.51 0.50  
12 -6 -8 -0.19 0.50  
-12 6 8 -0.31 0.40  
12 6 -8 0.34 0.42  
11 -6 -8 -0.34 0.45  
-11 -6 8 -0.09 0.37  
-11 6 8 -0.24 0.33  
11 6 -8 -0.30 0.36  
-11 6 8 -0.12 0.36

-10 -6 8 -0.01 0.41  
10 -6 -8 0.37 0.42  
-10 6 8 0.28 0.35  
10 6 -8 -0.05 0.34  
-10 6 8 0.03 0.35  
-9 -6 8 1.00 0.39  
9 -6 -8 1.09 0.46  
-9 6 8 1.31 0.37  
9 6 -8 1.93 0.42  
-9 6 8 2.62 0.43  
-8 -6 8 1.84 0.46  
8 -6 -8 2.50 0.56  
-8 6 8 2.62 0.41  
8 6 -8 1.95 0.40  
7 -6 -8 1.97 0.47  
-7 -6 8 2.04 0.43  
-7 6 8 2.44 0.35  
-7 6 8 2.48 0.39  
7 6 -8 2.05 0.39  
-6 -6 8 6.71 0.62  
6 -6 -8 5.42 0.61  
-6 -6 8 5.90 0.46  
-6 6 8 6.18 0.53  
6 6 -8 6.38 0.55  
-6 6 8 6.15 0.44  
5 -6 -8 0.95 0.40  
-5 -6 8 1.25 0.38  
-5 -6 8 1.18 0.36  
-5 6 8 1.12 0.33  
5 6 -8 1.05 0.33  
-4 -6 8 10.25 0.70  
4 -6 -8 9.20 0.58  
4 -6 -8 8.02 0.68  
-4 -6 8 9.89 0.57  
4 6 -8 10.54 0.62  
-4 6 8 8.73 0.55  
-3 -6 8 2.02 0.43  
3 -6 -8 0.88 0.33  
-3 -6 8 1.41 0.35  
3 -6 -8 2.22 0.49  
-3 6 8 1.90 0.34  
3 6 -8 1.95 0.36  
-2 -6 8 2.07 0.40  
2 -6 -8 2.13 0.36  
-2 -6 8 1.84 0.39  
2 -6 -8 2.17 0.48

|    |    |    |       |      |
|----|----|----|-------|------|
| -2 | 6  | 8  | 1.78  | 0.32 |
| 2  | 6  | -8 | 2.40  | 0.35 |
| 1  | -6 | -8 | 0.86  | 0.30 |
| -1 | -6 | 8  | 1.46  | 0.35 |
| -1 | 6  | 8  | 1.08  | 0.29 |
| -1 | 6  | 8  | 1.24  | 0.39 |
| 1  | 6  | -8 | 1.03  | 0.27 |
| 0  | -6 | -8 | 3.47  | 0.45 |
| 0  | -6 | 8  | 2.93  | 0.42 |
| 0  | 6  | 8  | 3.91  | 0.51 |
| 0  | 6  | -8 | 4.14  | 0.35 |
| 0  | 6  | -8 | 2.93  | 0.44 |
| 0  | 6  | 8  | 2.88  | 0.37 |
| 1  | -6 | 8  | 12.49 | 0.70 |
| -1 | -6 | -8 | 11.52 | 0.67 |
| 1  | -6 | 8  | 14.54 | 0.67 |
| 1  | 6  | 8  | 13.37 | 0.61 |
| -1 | 6  | -8 | 13.27 | 0.74 |
| 1  | 6  | 8  | 13.58 | 0.79 |
| 2  | -6 | 8  | 8.32  | 0.63 |
| 2  | -6 | 8  | 9.98  | 0.61 |
| -2 | -6 | -8 | 9.26  | 0.63 |
| 2  | 6  | 8  | 10.37 | 0.76 |
| -2 | 6  | -8 | 9.97  | 0.69 |
| 2  | 6  | 8  | 8.86  | 0.51 |
| -3 | -6 | -8 | -0.33 | 0.33 |
| 3  | -6 | 8  | 0.04  | 0.32 |
| 3  | -6 | 8  | 0.41  | 0.40 |
| 3  | 6  | 8  | 0.12  | 0.26 |
| 3  | 6  | 8  | 1.12  | 0.44 |
| -3 | 6  | -8 | 0.46  | 0.35 |
| -4 | -6 | -8 | 2.56  | 0.46 |
| 4  | -6 | 8  | 3.47  | 0.54 |
| 4  | 6  | 8  | 3.46  | 0.39 |
| -4 | 6  | -8 | 3.60  | 0.52 |
| 4  | 6  | 8  | 3.06  | 0.53 |
| -5 | -6 | -8 | 1.04  | 0.44 |
| 5  | -6 | 8  | 2.76  | 0.51 |
| 5  | -6 | 8  | 2.41  | 0.50 |
| 5  | 6  | 8  | 0.81  | 0.43 |
| -5 | 6  | -8 | 1.96  | 0.49 |
| 6  | -6 | 8  | 0.69  | 0.42 |
| 6  | -6 | 8  | 0.32  | 0.41 |
| -6 | -6 | -8 | 0.44  | 0.45 |
| 6  | 6  | 8  | 0.44  | 0.47 |
| -6 | 6  | -8 | 0.17  | 0.42 |

7 -6 8 1.75 0.54  
7 -6 8 1.06 0.46  
-7 -6 -8 0.83 0.51  
7 6 8 0.84 0.54  
-7 6 -8 0.56 0.45  
-8 -6 -8 -0.53 0.49  
8 -6 8 -0.18 0.47  
8 -6 8 0.24 0.51  
-8 6 -8 -0.02 0.47  
8 6 8 -0.43 0.50  
13 7 -8 -0.21 0.44  
-13 7 8 0.48 0.48  
-12 -7 8 -0.31 0.41  
12 -7 -8 0.34 0.52  
-12 7 8 -0.29 0.39  
12 7 -8 -0.16 0.40  
11 -7 -8 -0.20 0.48  
-11 -7 8 -0.20 0.47  
11 7 -8 0.06 0.41  
-11 7 8 0.14 0.40  
-11 7 8 -0.08 0.36  
-10 -7 8 1.40 0.45  
10 -7 -8 0.88 0.48  
10 7 -8 0.72 0.41  
-10 7 8 1.54 0.44  
-10 7 8 0.50 0.38  
9 -7 -8 0.57 0.49  
-9 -7 8 0.81 0.43  
-9 7 8 0.78 0.35  
9 7 -8 1.08 0.39  
-9 7 8 1.60 0.38  
8 -7 -8 6.30 0.71  
-8 -7 8 8.76 0.73  
-8 7 8 7.98 0.63  
8 7 -8 5.49 0.56  
7 -7 -8 -0.49 0.43  
-7 -7 8 0.32 0.38  
-7 7 8 -0.25 0.25  
7 7 -8 0.41 0.34  
-7 7 8 -0.18 0.29  
-6 -7 8 4.43 0.44  
6 -7 -8 3.59 0.57  
-6 -7 8 3.29 0.48  
-6 7 8 4.27 0.48  
6 7 -8 4.28 0.48  
5 -7 -8 5.35 0.63



-5 -7 8 5.76 0.56  
-5 7 8 4.95 0.48  
5 7 -8 5.53 0.52  
4 -7 -8 0.74 0.35  
-4 -7 8 0.79 0.33  
-4 -7 8 1.34 0.38  
4 -7 -8 1.71 0.47  
-4 7 8 1.21 0.33  
4 7 -8 1.13 0.35  
3 -7 -8 2.02 0.41  
3 -7 -8 1.93 0.45  
-3 -7 8 3.01 0.45  
-3 -7 8 1.61 0.37  
-3 7 8 2.04 0.36  
3 7 -8 2.25 0.38  
2 -7 -8 2.13 0.40  
-2 -7 8 2.24 0.40  
-2 -7 8 2.16 0.45  
2 -7 -8 2.40 0.50  
2 7 -8 2.98 0.38  
-2 7 8 2.81 0.38  
-1 -7 8 0.32 0.31  
1 -7 -8 0.06 0.28  
1 7 -8 -0.07 0.24  
-1 7 8 0.44 0.40  
1 7 -8 -0.17 0.32  
-1 7 8 0.51 0.30  
0 -7 -8 12.40 0.69  
0 7 -8 12.07 0.56  
0 7 8 12.86 0.73  
0 7 -8 12.96 0.71  
0 7 8 12.13 0.65  
1 -7 8 6.17 0.59  
-1 -7 -8 6.91 0.59  
1 7 8 7.12 0.65  
-1 7 -8 7.19 0.61  
1 7 8 7.22 0.55  
2 -7 8 0.43 0.34  
-2 -7 -8 0.69 0.38  
2 7 8 0.33 0.29  
2 7 8 0.81 0.39  
-2 7 -8 0.65 0.38  
-3 -7 -8 1.57 0.44  
3 -7 8 0.81 0.38  
-3 7 -8 1.53 0.38  
3 7 8 1.04 0.46

3 7 8 1.77 0.35  
4 -7 8 0.57 0.38  
-4 -7 -8 -0.34 0.36  
-4 7 -8 0.37 0.34  
4 7 8 0.32 0.43  
-5 -7 -8 -0.06 0.41  
5 -7 8 -0.11 0.41  
5 7 8 0.96 0.50  
-5 7 -8 0.58 0.38  
-6 -7 -8 0.10 0.41  
6 -7 8 0.05 0.45  
6 7 8 0.01 0.50  
-6 7 -8 -0.12 0.37  
-7 -7 -8 -0.11 0.49  
7 -7 8 0.02 0.49  
-7 7 -8 0.11 0.45  
7 7 8 0.68 0.53  
8 7 8 -0.55 0.87  
-12 -8 8 -0.58 0.48  
12 -8 -8 -0.42 0.52  
-12 8 8 0.29 0.46  
12 8 -8 -0.43 0.49  
11 -8 -8 -0.33 0.50  
-11 -8 8 0.53 0.50  
-11 8 8 0.71 0.47  
11 8 -8 0.07 0.47  
-11 8 8 0.21 0.40  
-10 -8 8 0.14 0.41  
10 -8 -8 -0.20 0.43  
10 8 -8 0.31 0.45  
-10 8 8 0.83 0.43  
-10 8 8 0.02 0.37  
9 -8 -8 0.46 0.51  
-9 -8 8 0.40 0.44  
-9 8 8 0.43 0.41  
9 8 -8 0.87 0.40  
-8 -8 8 -0.17 0.38  
8 -8 -8 -0.29 0.46  
8 8 -8 -0.16 0.33  
-8 8 8 0.04 0.37  
-7 -8 8 3.26 0.54  
-7 -8 8 3.21 0.44  
7 -8 -8 3.31 0.60  
-7 8 8 2.72 0.46  
7 8 -8 2.04 0.42  
6 -8 -8 0.54 0.48

-6 -8 8 0.88 0.42  
-6 8 8 0.58 0.34  
6 8 -8 0.86 0.37  
-5 -8 8 5.09 0.50  
5 -8 -8 5.49 0.65  
-5 -8 8 4.39 0.54  
-5 8 8 5.47 0.54  
5 8 -8 3.63 0.47  
4 -8 -8 4.49 0.52  
-4 -8 8 3.46 0.49  
4 -8 -8 4.00 0.59  
-4 -8 8 3.60 0.46  
-4 8 8 3.34 0.44  
4 8 -8 4.44 0.47  
-3 -8 8 0.39 0.34  
3 -8 -8 0.31 0.40  
-3 -8 8 0.50 0.35  
3 -8 -8 0.34 0.35  
3 8 -8 0.95 0.31  
-3 8 8 0.43 0.29  
2 -8 -8 1.99 0.46  
2 -8 -8 1.33 0.43  
-2 -8 8 0.88 0.34  
-2 -8 8 2.18 0.43  
2 8 -8 1.51 0.32  
-2 8 8 1.68 0.38  
-1 -8 8 0.50 0.37  
1 -8 -8 1.06 0.41  
1 8 -8 0.40 0.34  
1 8 -8 1.18 0.30  
-1 8 8 0.99 0.32  
0 -8 8 0.68 0.35  
0 -8 -8 1.47 0.43  
0 8 8 1.10 0.43  
0 8 -8 0.51 0.36  
0 8 8 1.22 0.32  
1 -8 8 0.93 0.38  
-1 -8 -8 0.95 0.43  
1 8 8 0.45 0.38  
1 8 8 0.76 0.32  
-1 8 -8 0.80 0.35  
2 -8 8 0.51 0.36  
-2 -8 -8 -0.14 0.34  
2 8 8 0.49 0.31  
2 8 8 -0.20 0.36  
-2 8 -8 0.20 0.32

3 -8 8 0.14 0.34  
-3 -8 -8 0.17 0.40  
3 8 8 0.06 0.40  
3 8 8 0.10 0.27  
-3 8 -8 0.13 0.37  
4 -8 8 0.33 0.38  
-4 -8 -8 -0.43 0.34  
4 8 8 -0.15 0.42  
-4 8 -8 0.31 0.40  
4 8 8 0.21 0.28  
5 -8 8 0.87 0.44  
-5 -8 -8 0.84 0.51  
5 8 8 0.80 0.50  
-5 8 -8 0.42 0.44  
6 -8 8 0.92 0.46  
-6 -8 -8 0.16 0.50  
6 8 8 0.16 0.50  
-6 8 -8 0.63 0.44  
7 -8 8 0.25 0.50  
-7 -8 -8 -0.33 0.51  
-7 8 -8 0.05 0.40  
7 8 8 -0.38 0.50  
-12 -9 8 -0.04 0.68  
11 -9 -8 -0.33 0.53  
-11 -9 8 0.33 0.45  
11 9 -8 -0.16 0.44  
-10 -9 8 0.21 0.46  
10 -9 -8 -0.01 0.50  
-10 9 8 0.46 0.45  
10 9 -8 0.83 0.46  
-9 -9 8 0.07 0.44  
9 -9 -8 0.62 0.51  
9 9 -8 -0.33 0.38  
-9 9 8 0.21 0.42  
-8 -9 8 0.06 0.36  
8 -9 -8 -0.66 0.45  
8 9 -8 0.58 0.42  
-8 9 8 -0.32 0.37  
-7 -9 8 1.83 0.44  
7 -9 -8 1.10 0.53  
-7 9 8 1.63 0.42  
7 9 -8 0.31 0.36  
6 -9 -8 3.01 0.60  
-6 -9 8 3.88 0.48  
-6 -9 8 6.04 0.65  
-6 9 8 3.76 0.50

|    |    |    |      |      |
|----|----|----|------|------|
| 6  | 9  | -8 | 4.50 | 0.53 |
| -5 | -9 | 8  | 4.63 | 0.51 |
| 5  | -9 | -8 | 5.05 | 0.69 |
| -5 | -9 | 8  | 4.17 | 0.58 |
| 5  | 9  | -8 | 3.24 | 0.47 |
| -5 | 9  | 8  | 4.07 | 0.52 |
| -4 | -9 | 8  | 1.79 | 0.42 |
| -4 | -9 | 8  | 1.47 | 0.44 |
| 4  | -9 | -8 | 2.18 | 0.53 |
| 4  | -9 | -8 | 1.19 | 0.43 |
| 4  | 9  | -8 | 1.60 | 0.38 |
| -4 | 9  | 8  | 1.78 | 0.43 |
| -3 | -9 | 8  | 2.25 | 0.44 |
| 3  | -9 | -8 | 1.77 | 0.52 |
| -3 | -9 | 8  | 1.33 | 0.40 |
| 3  | -9 | -8 | 1.43 | 0.47 |
| 3  | 9  | -8 | 1.52 | 0.36 |
| -3 | 9  | 8  | 1.73 | 0.40 |
| 2  | -9 | -8 | 1.85 | 0.48 |
| 2  | -9 | -8 | 2.49 | 0.52 |
| -2 | -9 | 8  | 2.13 | 0.46 |
| -2 | 9  | 8  | 2.30 | 0.40 |
| 2  | 9  | -8 | 2.13 | 0.38 |
| 1  | -9 | -8 | 0.86 | 0.42 |
| -1 | -9 | 8  | 1.12 | 0.39 |
| 1  | -9 | -8 | 1.76 | 0.48 |
| 1  | 9  | -8 | 0.48 | 0.36 |
| -1 | 9  | 8  | 0.68 | 0.36 |
| 1  | 9  | -8 | 0.98 | 0.33 |
| 0  | -9 | 8  | 1.23 | 0.43 |
| 0  | -9 | -8 | 1.63 | 0.49 |
| 0  | 9  | -8 | 1.90 | 0.46 |
| 0  | 9  | 8  | 1.11 | 0.45 |
| 0  | 9  | 8  | 1.70 | 0.36 |
| -1 | -9 | -8 | 3.12 | 0.56 |
| 1  | -9 | 8  | 2.79 | 0.48 |
| -1 | 9  | -8 | 2.31 | 0.46 |
| 1  | 9  | 8  | 2.34 | 0.51 |
| 1  | 9  | 8  | 3.97 | 0.49 |
| 2  | -9 | 8  | 0.74 | 0.39 |
| -2 | -9 | -8 | 0.87 | 0.47 |
| 2  | 9  | 8  | 0.99 | 0.45 |
| -2 | 9  | -8 | 0.50 | 0.40 |
| 2  | 9  | 8  | 0.67 | 0.32 |
| -3 | -9 | -8 | 0.19 | 0.44 |
| 3  | -9 | 8  | 0.43 | 0.39 |

-3 9 -8 0.26 0.40  
3 9 8 0.37 0.30  
3 9 8 0.51 0.46  
-4 -9 -8 0.49 0.44  
4 -9 8 1.58 0.47  
4 9 8 1.25 0.40  
-4 9 -8 1.81 0.45  
4 9 8 1.41 0.54  
5 -9 8 0.69 0.44  
-5 -9 -8 0.23 0.45  
5 9 8 0.03 0.49  
-5 9 -8 0.46 0.46  
-6 -9 -8 0.00 0.45  
6 -9 8 0.36 0.46  
-6 9 -8 0.21 0.49  
6 9 8 0.16 0.53  
7 9 8 -0.57 0.52  
11 -10 -8 -0.08 0.56  
-11 -10 8 -0.07 0.45  
10 -10 -8 -0.33 0.50  
-10 -10 8 0.04 0.46  
10 10 -8 0.28 0.46  
-10 10 8 0.28 0.45  
9 -10 -8 0.11 0.51  
-9 -10 8 -0.48 0.41  
-9 10 8 0.36 0.46  
9 10 -8 0.04 0.43  
-8 -10 8 1.12 0.47  
8 -10 -8 -0.17 0.49  
8 10 -8 0.26 0.42  
-8 10 8 1.48 0.44  
-7 -10 8 0.56 0.44  
7 -10 -8 0.04 0.48  
-7 -10 8 0.53 0.39  
-7 10 8 0.18 0.37  
7 10 -8 0.26 0.45  
-6 -10 8 3.01 0.51  
6 -10 -8 3.60 0.65  
-6 -10 8 2.95 0.49  
-6 10 8 3.24 0.51  
6 10 -8 2.73 0.50  
-5 -10 8 -0.49 0.35  
5 -10 -8 0.07 0.47  
-5 -10 8 -0.22 0.29  
5 10 -8 -0.22 0.38  
-5 10 8 0.27 0.36

|    |     |    |       |      |
|----|-----|----|-------|------|
| 4  | -10 | -8 | 0.78  | 0.42 |
| -4 | -10 | 8  | 1.12  | 0.45 |
| -4 | -10 | 8  | 0.98  | 0.41 |
| 4  | -10 | -8 | 1.22  | 0.47 |
| 4  | 10  | -8 | 0.97  | 0.39 |
| -4 | 10  | 8  | 0.87  | 0.38 |
| -3 | -10 | 8  | 2.24  | 0.50 |
| -3 | -10 | 8  | 2.12  | 0.45 |
| 3  | -10 | -8 | 2.32  | 0.52 |
| 3  | -10 | -8 | 2.71  | 0.57 |
| 3  | 10  | -8 | 2.30  | 0.42 |
| -3 | 10  | 8  | 2.72  | 0.49 |
| 2  | -10 | -8 | 0.95  | 0.45 |
| 2  | -10 | -8 | 0.92  | 0.47 |
| -2 | -10 | 8  | 0.89  | 0.42 |
| -2 | 10  | 8  | 1.71  | 0.40 |
| 2  | 10  | -8 | 1.28  | 0.44 |
| 2  | 10  | -8 | 1.45  | 0.39 |
| 1  | -10 | -8 | 1.47  | 0.47 |
| -1 | -10 | 8  | 1.55  | 0.46 |
| 1  | -10 | -8 | 1.55  | 0.52 |
| 1  | 10  | -8 | 1.62  | 0.38 |
| 1  | 10  | -8 | 1.62  | 0.42 |
| -1 | 10  | 8  | 1.45  | 0.38 |
| 0  | -10 | -8 | 3.06  | 0.52 |
| 0  | -10 | -8 | 2.49  | 0.56 |
| 0  | -10 | 8  | 2.54  | 0.52 |
| 0  | 10  | -8 | 2.22  | 0.46 |
| 0  | 10  | 8  | 2.11  | 0.43 |
| 1  | -10 | 8  | 0.56  | 0.38 |
| -1 | -10 | -8 | 0.49  | 0.48 |
| 1  | 10  | 8  | 0.00  | 0.41 |
| 1  | 10  | 8  | 1.12  | 0.35 |
| -1 | 10  | -8 | 0.28  | 0.39 |
| -2 | -10 | -8 | -0.35 | 0.46 |
| 2  | -10 | 8  | 0.41  | 0.39 |
| -2 | 10  | -8 | 0.17  | 0.40 |
| 2  | 10  | 8  | -0.07 | 0.43 |
| 2  | 10  | 8  | 0.29  | 0.36 |
| 3  | -10 | 8  | 0.34  | 0.46 |
| -3 | -10 | -8 | -0.49 | 0.47 |
| 3  | 10  | 8  | 0.26  | 0.32 |
| 3  | 10  | 8  | -0.18 | 0.47 |
| -3 | 10  | -8 | 0.42  | 0.40 |
| -4 | -10 | -8 | 0.23  | 0.54 |
| 4  | -10 | 8  | 0.50  | 0.47 |

-4 10 -8 0.20 0.39  
4 10 8 -0.19 0.47  
4 10 8 0.60 0.40  
-5 -10 -8 0.16 0.55  
5 -10 8 0.28 0.51  
5 10 8 0.40 0.52  
-5 10 -8 0.47 0.43  
6 -10 8 0.83 0.84  
6 10 8 0.00 0.53  
10 -11 -8 0.07 0.53  
-10 -11 8 -0.01 0.46  
9 -11 -8 0.35 0.57  
-9 -11 8 -0.02 0.40  
-9 11 8 -0.42 0.39  
9 11 -8 0.49 0.52  
8 -11 -8 0.07 0.56  
-8 -11 8 -0.14 0.42  
8 11 -8 -0.49 0.39  
-8 11 8 0.60 0.49  
-7 -11 8 -0.12 0.42  
7 -11 -8 0.50 0.55  
-7 -11 8 0.62 0.45  
-7 11 8 0.20 0.46  
7 11 -8 0.17 0.42  
6 -11 -8 1.54 0.60  
-6 -11 8 1.08 0.46  
-6 -11 8 0.49 0.40  
6 11 -8 0.87 0.49  
-6 11 8 1.60 0.46  
-5 -11 8 0.05 0.35  
5 -11 -8 -0.10 0.48  
-5 -11 8 0.50 0.40  
-5 11 8 -0.61 0.40  
5 11 -8 -0.40 0.40  
4 -11 -8 -0.06 0.49  
-4 -11 8 0.90 0.39  
-4 -11 8 0.09 0.41  
4 -11 -8 0.64 0.45  
4 11 -8 0.29 0.36  
-4 11 8 0.82 0.44  
3 -11 -8 -0.62 0.43  
3 -11 -8 -0.06 0.44  
-3 -11 8 0.78 0.43  
3 11 -8 -0.59 0.35  
-3 11 8 0.43 0.38  
2 -11 -8 0.02 0.44



|    |     |    |       |      |
|----|-----|----|-------|------|
| 2  | -11 | -8 | 0.60  | 0.51 |
| -2 | -11 | 8  | 0.67  | 0.38 |
| 2  | 11  | -8 | 0.42  | 0.38 |
| -2 | 11  | 8  | 1.40  | 0.46 |
| 2  | 11  | -8 | 0.59  | 0.42 |
| 1  | -11 | -8 | -0.17 | 0.41 |
| 1  | -11 | -8 | 0.09  | 0.47 |
| -1 | -11 | 8  | 0.28  | 0.42 |
| -1 | 11  | 8  | 0.42  | 0.35 |
| 1  | 11  | -8 | 0.17  | 0.40 |
| 0  | -11 | -8 | 0.29  | 0.52 |
| 0  | -11 | 8  | 0.25  | 0.44 |
| 0  | -11 | -8 | 1.03  | 0.48 |
| 0  | 11  | -8 | 0.15  | 0.41 |
| 0  | 11  | 8  | 0.49  | 0.34 |
| 1  | -11 | 8  | 1.02  | 0.43 |
| -1 | -11 | -8 | 0.66  | 0.50 |
| 1  | 11  | 8  | 0.82  | 0.42 |
| -1 | 11  | -8 | 0.82  | 0.46 |
| 2  | -11 | 8  | 0.05  | 0.45 |
| -2 | -11 | -8 | -0.50 | 0.43 |
| 2  | 11  | 8  | -0.04 | 0.38 |
| -2 | 11  | -8 | -0.08 | 0.42 |
| 2  | 11  | 8  | 0.17  | 0.49 |
| 3  | -11 | 8  | 0.90  | 0.46 |
| -3 | -11 | -8 | 0.01  | 0.50 |
| 3  | 11  | 8  | 1.56  | 0.55 |
| 3  | 11  | 8  | 1.11  | 0.44 |
| -3 | 11  | -8 | 0.82  | 0.48 |
| -4 | -11 | -8 | -0.41 | 0.54 |
| 4  | -11 | 8  | 0.13  | 0.43 |
| 4  | 11  | 8  | -0.24 | 0.49 |
| 4  | 11  | 8  | 0.84  | 0.38 |
| -4 | 11  | -8 | 0.08  | 0.46 |
| 5  | 11  | 8  | 0.07  | 0.56 |
| 9  | -12 | -8 | -0.13 | 0.56 |
| -9 | -12 | 8  | -0.13 | 0.44 |
| -9 | 12  | 8  | 0.26  | 0.52 |
| -8 | -12 | 8  | -0.41 | 0.41 |
| 8  | -12 | -8 | -0.17 | 0.55 |
| 8  | 12  | -8 | -0.12 | 0.51 |
| -8 | 12  | 8  | -0.47 | 0.48 |
| -7 | -12 | 8  | 0.47  | 0.45 |
| -7 | -12 | 8  | 0.10  | 0.42 |
| 7  | -12 | -8 | -0.38 | 0.54 |
| 7  | 12  | -8 | 0.22  | 0.45 |

-7 12 8 -0.25 0.47  
-6 -12 8 -0.18 0.36  
6 -12 -8 0.09 0.53  
-6 -12 8 0.50 0.45  
6 12 -8 -0.12 0.42  
-6 12 8 0.45 0.49  
-5 -12 8 0.48 0.42  
-5 -12 8 0.58 0.46  
5 -12 -8 -0.33 0.53  
-5 12 8 -0.42 0.39  
5 12 -8 -0.29 0.38  
4 -12 -8 1.25 0.57  
-4 -12 8 1.81 0.46  
-4 -12 8 0.83 0.47  
4 12 -8 1.45 0.46  
-4 12 8 2.29 0.57  
3 -12 -8 0.12 0.50  
3 -12 -8 0.00 0.49  
-3 -12 8 0.54 0.46  
-3 12 8 0.06 0.46  
3 12 -8 0.64 0.47  
3 12 -8 0.49 0.40  
2 -12 -8 -0.40 0.49  
-2 -12 8 0.25 0.44  
2 -12 -8 0.01 0.47  
-2 12 8 0.18 0.40  
2 12 -8 -0.51 0.40  
2 12 -8 0.50 0.45  
-1 -12 8 2.10 0.55  
1 -12 -8 1.99 0.58  
1 -12 -8 2.35 0.59  
-1 12 8 2.06 0.53  
1 12 -8 1.99 0.48  
0 -12 8 0.14 0.47  
0 -12 -8 0.29 0.60  
0 -12 -8 0.82 0.52  
0 12 8 0.79 0.43  
0 12 -8 0.79 0.48  
1 -12 8 0.23 0.48  
-1 -12 -8 1.04 0.52  
-1 -12 -8 -0.86 0.50  
-1 12 -8 0.24 0.41  
1 12 8 0.44 0.38  
-2 -12 -8 2.18 0.63  
2 -12 8 0.94 0.52  
-2 12 -8 1.47 0.54

|    |     |    |       |      |
|----|-----|----|-------|------|
| 2  | 12  | 8  | 1.04  | 0.47 |
| -3 | -12 | -8 | -1.27 | 0.45 |
| 3  | -12 | 8  | 0.44  | 0.52 |
| -3 | 12  | -8 | 0.10  | 0.42 |
| 3  | 12  | 8  | 0.42  | 0.39 |
| 4  | 12  | 8  | 0.63  | 0.45 |
| 5  | 12  | 8  | 0.36  | 0.45 |
| 8  | -13 | -8 | -0.24 | 0.59 |
| -8 | -13 | 8  | 0.64  | 0.50 |
| -8 | 13  | 8  | -0.34 | 0.47 |
| 7  | -13 | -8 | -0.91 | 0.58 |
| -7 | -13 | 8  | -0.01 | 0.47 |
| -7 | -13 | 8  | 0.17  | 0.45 |
| 7  | 13  | -8 | -0.32 | 0.51 |
| -7 | 13  | 8  | 0.52  | 0.52 |
| 6  | -13 | -8 | -0.93 | 0.53 |
| -6 | -13 | 8  | 0.61  | 0.50 |
| -6 | -13 | 8  | -0.10 | 0.43 |
| 6  | 13  | -8 | -0.33 | 0.51 |
| -6 | 13  | 8  | 0.03  | 0.43 |
| -5 | -13 | 8  | -0.48 | 0.44 |
| -5 | -13 | 8  | 0.26  | 0.47 |
| 5  | -13 | -8 | -0.81 | 0.51 |
| 5  | 13  | -8 | -0.18 | 0.42 |
| -5 | 13  | 8  | 0.81  | 0.53 |
| -4 | -13 | 8  | 0.46  | 0.49 |
| 4  | -13 | -8 | -0.03 | 0.57 |
| 4  | 13  | -8 | 0.21  | 0.44 |
| -4 | 13  | 8  | 0.25  | 0.47 |
| 4  | 13  | -8 | 0.37  | 0.43 |
| 3  | -13 | -8 | 1.25  | 0.55 |
| 3  | -13 | -8 | 1.50  | 0.63 |
| -3 | -13 | 8  | 0.88  | 0.50 |
| 3  | 13  | -8 | 0.76  | 0.49 |
| -3 | 13  | 8  | 1.00  | 0.53 |
| 3  | 13  | -8 | 0.74  | 0.50 |
| 2  | -13 | -8 | 1.83  | 0.63 |
| 2  | -13 | -8 | 1.75  | 0.80 |
| -2 | -13 | 8  | 1.15  | 0.52 |
| 2  | 13  | -8 | 1.44  | 0.53 |
| 2  | 13  | -8 | 1.80  | 0.54 |
| -2 | 13  | 8  | 1.26  | 0.50 |
| -1 | -13 | 8  | -0.03 | 0.49 |
| 1  | -13 | -8 | -0.39 | 0.55 |
| -1 | 13  | 8  | 0.10  | 0.43 |
| 1  | 13  | -8 | 0.30  | 0.49 |

|     |     |    |       |      |
|-----|-----|----|-------|------|
| 0   | -13 | -8 | -0.73 | 0.56 |
| 0   | -13 | 8  | -0.24 | 0.41 |
| 0   | 13  | -8 | 0.45  | 0.50 |
| 0   | 13  | 8  | 0.22  | 0.42 |
| -1  | -13 | -8 | 0.23  | 0.55 |
| 1   | -13 | 8  | 0.58  | 0.51 |
| -1  | 13  | -8 | 0.44  | 0.49 |
| 1   | 13  | 8  | 1.36  | 0.52 |
| 2   | -13 | 8  | 0.59  | 0.58 |
| -2  | -13 | -8 | -0.69 | 0.53 |
| -2  | 13  | -8 | 0.53  | 0.51 |
| 2   | 13  | 8  | -0.17 | 0.39 |
| -6  | -14 | 8  | 0.89  | 0.54 |
| -6  | -14 | 8  | -0.33 | 0.43 |
| -5  | -14 | 8  | 0.61  | 0.50 |
| 5   | 14  | -8 | 0.31  | 0.44 |
| -5  | 14  | 8  | -0.28 | 0.52 |
| 5   | 14  | -8 | -0.10 | 0.53 |
| -4  | -14 | 8  | 0.17  | 0.49 |
| -4  | 14  | 8  | -0.34 | 0.51 |
| 4   | 14  | -8 | 0.05  | 0.51 |
| 4   | 14  | -8 | -0.39 | 0.43 |
| -3  | -14 | 8  | 0.41  | 0.53 |
| 3   | -14 | -8 | -0.04 | 0.52 |
| -3  | 14  | 8  | 0.10  | 0.46 |
| 3   | 14  | -8 | 0.19  | 0.51 |
| 3   | 14  | -8 | 0.15  | 0.42 |
| -2  | -14 | 8  | 0.79  | 0.52 |
| 2   | -14 | -8 | 0.85  | 0.58 |
| -2  | 14  | 8  | 0.45  | 0.48 |
| 2   | 14  | -8 | 1.12  | 0.49 |
| 1   | -14 | -8 | -0.47 | 0.56 |
| -1  | -14 | 8  | 0.94  | 0.56 |
| 1   | 14  | -8 | 0.15  | 0.50 |
| -1  | 14  | 8  | 0.82  | 0.56 |
| 0   | -14 | -8 | 0.36  | 0.64 |
| 0   | 14  | -8 | -0.17 | 0.52 |
| 3   | 15  | -8 | -0.03 | 0.63 |
| 2   | -15 | -8 | -0.32 | 0.89 |
| 14  | 0   | -9 | 0.36  | 0.51 |
| -14 | 0   | 9  | -0.04 | 0.44 |
| -13 | 0   | 9  | 2.03  | 0.57 |
| 13  | 0   | -9 | 2.14  | 0.47 |
| 13  | 0   | -9 | 2.39  | 0.57 |
| -12 | 0   | 9  | -0.10 | 0.43 |
| 12  | 0   | -9 | -0.50 | 0.43 |

|     |   |    |       |      |
|-----|---|----|-------|------|
| 12  | 0 | -9 | 0.15  | 0.34 |
| 11  | 0 | -9 | 0.40  | 0.33 |
| 11  | 0 | -9 | 0.59  | 0.42 |
| -11 | 0 | 9  | -0.17 | 0.35 |
| -10 | 0 | 9  | -0.18 | 0.35 |
| 10  | 0 | -9 | 0.88  | 0.42 |
| 9   | 0 | -9 | 0.69  | 0.40 |
| -9  | 0 | 9  | 0.03  | 0.31 |
| -9  | 0 | 9  | 0.47  | 0.34 |
| -8  | 0 | 9  | 1.43  | 0.36 |
| -8  | 0 | 9  | 1.54  | 0.41 |
| 8   | 0 | -9 | 1.70  | 0.43 |
| -7  | 0 | 9  | 2.32  | 0.36 |
| -7  | 0 | 9  | 4.05  | 0.47 |
| 7   | 0 | -9 | 3.82  | 0.53 |
| 6   | 0 | -9 | 3.19  | 0.59 |
| -6  | 0 | 9  | 2.20  | 0.35 |
| 6   | 0 | -9 | 2.72  | 0.46 |
| -6  | 0 | 9  | 2.25  | 0.46 |
| -6  | 0 | 9  | 2.48  | 0.41 |
| -5  | 0 | 9  | 14.08 | 0.63 |
| 5   | 0 | -9 | 15.29 | 0.88 |
| -5  | 0 | 9  | 15.17 | 0.69 |
| 5   | 0 | -9 | 16.34 | 0.79 |
| -5  | 0 | 9  | 14.31 | 0.52 |
| -5  | 0 | 9  | 15.65 | 0.84 |
| 5   | 0 | -9 | 15.31 | 0.49 |
| -4  | 0 | 9  | 2.66  | 0.34 |
| -4  | 0 | 9  | 2.42  | 0.42 |
| 4   | 0 | -9 | 2.42  | 0.42 |
| 4   | 0 | -9 | 2.64  | 0.27 |
| -4  | 0 | 9  | 3.22  | 0.34 |
| 4   | 0 | -9 | 2.58  | 0.47 |
| -4  | 0 | 9  | 3.02  | 0.38 |
| -3  | 0 | 9  | 0.18  | 0.26 |
| 3   | 0 | -9 | -0.21 | 0.29 |
| 3   | 0 | -9 | 0.01  | 0.19 |
| 3   | 0 | -9 | -0.04 | 0.30 |
| -2  | 0 | 9  | 0.05  | 0.33 |
| 2   | 0 | -9 | 0.39  | 0.32 |
| 2   | 0 | -9 | -0.25 | 0.29 |
| -2  | 0 | 9  | -0.01 | 0.21 |
| -2  | 0 | 9  | 0.00  | 0.27 |
| 1   | 0 | -9 | 2.81  | 0.47 |
| -1  | 0 | 9  | 3.25  | 0.46 |
| 1   | 0 | -9 | 2.57  | 0.46 |

0 0 9 1.65 0.44  
0 0 9 2.03 0.28  
0 0 -9 1.60 0.42  
0 0 -9 2.11 0.28  
0 0 -9 1.84 0.33  
0 0 9 2.62 0.46  
-1 0 -9 6.11 0.53  
1 0 9 5.33 0.36  
-1 0 -9 4.91 0.40  
1 0 9 4.80 0.51  
1 0 9 6.76 0.59  
-2 0 -9 3.41 0.45  
2 0 9 3.32 0.49  
-2 0 -9 2.75 0.34  
2 0 9 3.09 0.50  
-3 0 -9 1.92 0.38  
3 0 9 1.77 0.46  
3 0 9 1.45 0.47  
-3 0 -9 2.15 0.33  
-4 0 -9 0.24 0.32  
4 0 9 -0.30 0.37  
-4 0 -9 0.03 0.29  
4 0 9 -0.06 0.40  
5 0 9 0.72 0.50  
-5 0 -9 1.06 0.41  
5 0 9 1.08 0.42  
6 0 9 1.33 0.49  
-6 0 -9 0.96 0.43  
-7 0 -9 1.24 0.49  
7 0 9 -0.03 0.47  
-8 0 -9 0.10 0.41  
8 0 9 -0.12 0.47  
-14 -1 9 0.72 0.49  
14 -1 -9 0.90 0.54  
-14 1 9 0.89 0.49  
14 1 -9 0.53 0.52  
14 1 -9 -0.20 0.50  
13 -1 -9 -0.08 0.36  
13 -1 -9 0.05 0.50  
-13 -1 9 -0.31 0.39  
13 1 -9 -0.02 0.43  
-13 1 9 0.31 0.48  
13 1 -9 0.13 0.48  
12 -1 -9 0.66 0.41  
-12 -1 9 -0.01 0.44  
12 -1 -9 0.38 0.47

|     |    |    |       |      |
|-----|----|----|-------|------|
| 12  | 1  | -9 | 0.16  | 0.39 |
| 12  | 1  | -9 | 0.35  | 0.45 |
| -12 | 1  | 9  | 0.14  | 0.43 |
| -11 | -1 | 9  | 1.08  | 0.40 |
| 11  | -1 | -9 | 0.95  | 0.48 |
| -11 | 1  | 9  | 0.98  | 0.44 |
| 11  | 1  | -9 | 1.22  | 0.43 |
| 11  | 1  | -9 | 1.17  | 0.45 |
| -10 | -1 | 9  | 0.69  | 0.42 |
| 10  | -1 | -9 | 1.07  | 0.44 |
| 10  | 1  | -9 | 0.89  | 0.38 |
| -10 | 1  | 9  | 1.03  | 0.41 |
| -10 | 1  | 9  | 1.37  | 0.36 |
| 10  | 1  | -9 | 1.19  | 0.42 |
| -9  | -1 | 9  | 0.38  | 0.37 |
| 9   | -1 | -9 | 0.86  | 0.44 |
| 9   | 1  | -9 | -0.21 | 0.28 |
| -9  | 1  | 9  | 0.28  | 0.37 |
| 9   | 1  | -9 | 0.23  | 0.37 |
| -9  | 1  | 9  | 1.26  | 0.35 |
| -8  | -1 | 9  | 6.83  | 0.59 |
| 8   | -1 | -9 | 6.39  | 0.61 |
| -8  | -1 | 9  | 6.92  | 0.53 |
| 8   | 1  | -9 | 6.22  | 0.59 |
| -8  | 1  | 9  | 6.26  | 0.56 |
| -8  | 1  | 9  | 7.04  | 0.53 |
| -7  | -1 | 9  | 0.27  | 0.38 |
| -7  | -1 | 9  | 0.46  | 0.31 |
| 7   | -1 | -9 | -0.36 | 0.37 |
| -7  | -1 | 9  | 0.39  | 0.29 |
| 7   | 1  | -9 | 0.28  | 0.36 |
| -7  | 1  | 9  | 0.09  | 0.27 |
| -7  | 1  | 9  | 0.46  | 0.31 |
| -6  | -1 | 9  | 24.27 | 1.04 |
| -6  | -1 | 9  | 25.44 | 0.94 |
| 6   | -1 | -9 | 26.20 | 1.04 |
| 6   | 1  | -9 | 24.02 | 0.95 |
| 6   | 1  | -9 | 25.01 | 1.12 |
| -6  | 1  | 9  | 25.00 | 0.89 |
| -6  | 1  | 9  | 25.01 | 0.85 |
| 5   | -1 | -9 | 3.31  | 0.25 |
| -5  | -1 | 9  | 3.37  | 0.42 |
| 5   | -1 | -9 | 2.99  | 0.46 |
| -5  | -1 | 9  | 3.18  | 0.28 |
| -5  | -1 | 9  | 2.94  | 0.36 |
| -5  | -1 | 9  | 3.48  | 0.47 |

-5 1 9 3.06 0.37  
-5 1 9 2.66 0.48  
-5 1 9 2.67 0.52  
5 1 -9 2.40 0.47  
5 1 -9 3.88 0.47  
-4 -1 9 2.39 0.38  
-4 -1 9 2.75 0.34  
4 -1 -9 3.20 0.51  
4 -1 -9 3.73 0.30  
4 -1 -9 3.82 0.50  
-4 -1 9 3.23 0.32  
-4 1 9 3.00 0.35  
-4 1 9 2.80 0.42  
4 1 -9 3.15 0.47  
4 1 -9 3.07 0.44  
-4 1 9 2.57 0.35  
3 -1 -9 4.72 0.52  
3 -1 -9 5.93 0.37  
-3 -1 9 5.68 0.42  
3 -1 -9 5.16 0.59  
-3 -1 9 5.31 0.42  
-3 -1 9 5.69 0.48  
-3 1 9 5.24 0.41  
-3 1 9 5.85 0.42  
3 1 -9 5.20 0.54  
3 1 -9 5.43 0.51  
-2 -1 9 7.14 0.52  
2 -1 -9 6.80 0.61  
-2 -1 9 7.57 0.49  
-2 -1 9 7.00 0.45  
-2 -1 9 8.23 0.57  
2 -1 -9 6.07 0.61  
2 -1 -9 6.74 0.44  
-2 1 9 7.09 0.46  
-2 1 9 6.82 0.42  
2 1 -9 7.58 0.64  
2 1 -9 7.89 0.62  
-2 1 9 7.72 0.59  
1 -1 -9 14.56 0.84  
-1 -1 9 14.26 0.70  
-1 -1 9 13.37 0.66  
1 -1 -9 14.26 0.63  
1 1 -9 13.38 0.78  
-1 1 9 13.93 0.57  
-1 1 9 12.67 0.69  
-1 1 9 13.82 0.74



|    |    |    |       |      |
|----|----|----|-------|------|
| 1  | 1  | -9 | 14.19 | 0.79 |
| 0  | -1 | -9 | 9.43  | 0.46 |
| 0  | -1 | 9  | 9.07  | 0.44 |
| 0  | -1 | -9 | 9.50  | 0.57 |
| 0  | -1 | 9  | 8.89  | 0.57 |
| 0  | -1 | 9  | 9.38  | 0.65 |
| 0  | 1  | -9 | 9.44  | 0.70 |
| 0  | 1  | -9 | 7.91  | 0.49 |
| 0  | 1  | 9  | 9.72  | 0.64 |
| 0  | 1  | 9  | 9.43  | 0.46 |
| 0  | 1  | -9 | 10.04 | 1.08 |
| 0  | 1  | 9  | 9.70  | 0.69 |
| 1  | -1 | 9  | 2.83  | 0.45 |
| -1 | -1 | -9 | 3.39  | 0.32 |
| 1  | -1 | 9  | 2.69  | 0.27 |
| -1 | -1 | -9 | 2.04  | 0.35 |
| 1  | -1 | 9  | 2.52  | 0.44 |
| -1 | 1  | -9 | 1.83  | 0.32 |
| 1  | 1  | 9  | 1.67  | 0.45 |
| 1  | 1  | 9  | 2.85  | 0.30 |
| 1  | 1  | 9  | 3.98  | 0.54 |
| -2 | -1 | -9 | 3.53  | 0.34 |
| 2  | -1 | 9  | 4.40  | 0.52 |
| -2 | -1 | -9 | 3.43  | 0.43 |
| 2  | -1 | 9  | 4.33  | 0.50 |
| -2 | 1  | -9 | 3.81  | 0.40 |
| 2  | 1  | 9  | 3.94  | 0.53 |
| 2  | 1  | 9  | 3.21  | 0.54 |
| 3  | -1 | 9  | 1.43  | 0.45 |
| -3 | -1 | -9 | 0.83  | 0.35 |
| 3  | -1 | 9  | 1.04  | 0.41 |
| -3 | 1  | -9 | 1.25  | 0.34 |
| 3  | 1  | 9  | 1.86  | 0.48 |
| -3 | 1  | -9 | 0.67  | 0.28 |
| 4  | -1 | 9  | 2.04  | 0.53 |
| 4  | -1 | 9  | 1.95  | 0.48 |
| -4 | -1 | -9 | 2.16  | 0.41 |
| -4 | 1  | -9 | 1.95  | 0.36 |
| -4 | 1  | -9 | 2.23  | 0.40 |
| 4  | 1  | 9  | 2.31  | 0.51 |
| -5 | -1 | -9 | 0.09  | 0.35 |
| 5  | -1 | 9  | 1.11  | 0.45 |
| 5  | -1 | 9  | -0.25 | 0.40 |
| -5 | 1  | -9 | 0.28  | 0.32 |
| 5  | 1  | 9  | -0.12 | 0.40 |
| -5 | 1  | -9 | 0.11  | 0.30 |

-6 -1 -9 0.07 0.35  
6 -1 9 1.06 0.50  
6 -1 9 0.43 0.39  
-6 1 -9 0.52 0.40  
6 1 9 0.85 0.46  
-7 -1 -9 0.74 0.45  
7 -1 9 1.44 0.53  
7 1 9 0.62 0.51  
-7 1 -9 0.46 0.40  
8 -1 9 0.55 0.51  
-8 -1 -9 0.72 0.48  
-8 1 -9 0.24 0.48  
8 1 9 0.64 0.55  
-14 -2 9 -0.01 0.74  
14 -2 -9 0.16 0.53  
-14 2 9 0.10 0.50  
14 2 -9 0.83 0.44  
13 -2 -9 -0.04 0.41  
13 -2 -9 0.32 0.51  
-13 -2 9 0.32 0.50  
-13 2 9 0.24 0.46  
13 2 -9 -0.19 0.45  
13 2 -9 -0.28 0.43  
12 -2 -9 0.76 0.51  
-12 -2 9 0.45 0.47  
12 -2 -9 -0.10 0.33  
-12 2 9 0.26 0.43  
12 2 -9 -0.24 0.41  
12 2 -9 0.11 0.41  
11 -2 -9 1.08 0.47  
-11 -2 9 0.67 0.44  
-11 2 9 0.67 0.34  
11 2 -9 0.28 0.34  
11 2 -9 1.24 0.44  
-11 2 9 0.18 0.34  
-10 -2 9 0.17 0.35  
10 -2 -9 0.12 0.43  
-10 2 9 0.67 0.38  
10 2 -9 0.32 0.35  
-10 2 9 0.97 0.38  
10 2 -9 -0.06 0.38  
-9 -2 9 3.39 0.53  
9 -2 -9 3.11 0.55  
9 2 -9 3.55 0.47  
9 2 -9 2.72 0.43  
-9 2 9 2.78 0.41

-9 2 9 3.19 0.47  
8 -2 -9 1.21 0.45  
-8 -2 9 0.86 0.39  
-8 -2 9 0.63 0.48  
-8 2 9 0.66 0.31  
8 2 -9 1.04 0.33  
8 2 -9 0.81 0.39  
-8 2 9 0.83 0.35  
7 -2 -9 4.85 0.55  
-7 -2 9 4.39 0.55  
-7 -2 9 4.48 0.48  
7 2 -9 4.06 0.45  
7 2 -9 4.08 0.56  
7 2 -9 5.32 0.52  
-7 2 9 5.44 0.49  
-7 2 9 4.85 0.47  
-6 -2 9 1.16 0.37  
6 -2 -9 1.59 0.46  
-6 -2 9 1.91 0.42  
-6 2 9 1.30 0.36  
-6 2 9 1.61 0.33  
6 2 -9 1.84 0.40  
6 2 -9 1.38 0.42  
-5 -2 9 11.51 0.71  
5 -2 -9 12.97 0.79  
-5 -2 9 11.34 0.49  
-5 -2 9 10.82 0.57  
-5 -2 9 11.73 0.68  
5 2 -9 10.93 0.75  
-5 2 9 11.81 0.58  
-5 2 9 12.52 0.58  
5 2 -9 12.25 0.64  
4 -2 -9 7.93 0.40  
-4 -2 9 6.51 0.51  
-4 -2 9 8.19 0.46  
-4 -2 9 9.58 0.51  
4 -2 -9 7.44 0.61  
4 2 -9 7.75 0.62  
4 2 -9 7.85 0.60  
-4 2 9 7.51 0.48  
-4 2 9 8.39 0.52  
4 2 -9 8.73 0.57  
-4 2 9 7.10 0.62  
3 -2 -9 11.61 0.72  
3 -2 -9 11.03 0.74  
-3 -2 9 10.93 0.60

3 -2 -9 10.80 0.49  
-3 -2 9 10.99 0.55  
-3 -2 9 11.28 0.63  
-3 2 9 9.88 0.49  
3 2 -9 11.04 0.68  
3 2 -9 10.32 0.70  
-3 2 9 11.33 0.56  
2 -2 -9 3.18 0.49  
-2 -2 9 3.52 0.36  
2 -2 -9 3.86 0.36  
-2 -2 9 3.24 0.38  
-2 -2 9 3.93 0.44  
2 2 -9 3.88 0.48  
-2 2 9 4.12 0.34  
-2 2 9 2.99 0.34  
2 2 -9 3.59 0.45  
-2 2 9 4.35 0.52  
-1 -2 9 8.64 0.60  
1 -2 -9 7.86 0.40  
-1 -2 9 8.12 0.56  
-1 -2 9 8.24 0.44  
-1 -2 9 8.06 0.56  
1 -2 -9 7.30 0.50  
-1 2 9 7.54 0.47  
1 2 -9 7.68 0.60  
1 2 -9 5.84 0.55  
-1 2 9 6.89 0.58  
0 -2 -9 16.00 0.58  
0 -2 9 13.65 0.72  
0 -2 9 15.15 0.73  
0 -2 -9 15.44 0.70  
0 -2 9 13.79 0.53  
0 2 9 14.13 0.73  
0 2 -9 14.98 0.65  
0 2 -9 13.16 0.78  
0 2 -9 13.99 0.79  
1 -2 9 4.69 0.49  
-1 -2 -9 4.86 0.50  
1 -2 9 4.29 0.49  
1 2 9 4.46 0.53  
-1 2 -9 4.84 0.44  
1 2 9 4.67 0.37  
-2 -2 -9 2.02 0.41  
2 -2 9 1.67 0.42  
2 -2 9 2.77 0.46  
-2 2 -9 2.66 0.38

2 2 9 2.52 0.47  
2 2 9 2.01 0.27  
-3 -2 -9 10.25 0.69  
3 -2 9 10.12 0.72  
3 -2 9 10.97 0.73  
3 2 9 11.24 0.77  
-3 2 -9 11.48 0.62  
4 -2 9 2.63 0.50  
-4 -2 -9 1.66 0.38  
4 -2 9 1.91 0.42  
4 2 9 2.91 0.52  
-4 2 -9 2.39 0.41  
-5 -2 -9 0.69 0.34  
5 -2 9 0.55 0.40  
5 -2 9 0.23 0.47  
5 2 9 0.41 0.39  
-5 2 -9 0.38 0.31  
-5 2 -9 0.16 0.32  
6 -2 9 0.03 0.52  
6 -2 9 0.13 0.43  
-6 -2 -9 0.00 0.38  
-6 2 -9 0.08 0.33  
6 2 9 0.22 0.41  
-6 2 -9 -0.01 0.36  
7 -2 9 0.16 0.45  
-7 -2 -9 -0.10 0.41  
7 -2 9 0.62 0.59  
-7 2 -9 -0.19 0.40  
7 2 9 -0.09 0.46  
-8 -2 -9 1.57 0.54  
8 -2 9 1.67 0.56  
8 2 9 0.53 0.52  
-8 2 -9 0.43 0.42  
14 -3 -9 -0.80 0.81  
14 3 -9 -0.29 0.48  
-14 3 9 -0.06 0.53  
13 -3 -9 0.91 0.74  
13 -3 -9 -0.30 0.49  
-13 -3 9 0.34 0.51  
-13 3 9 -0.04 0.45  
13 3 -9 -0.57 0.43  
-12 -3 9 0.62 0.48  
12 -3 -9 0.97 0.52  
-12 3 9 0.44 0.42  
12 3 -9 0.21 0.42  
-12 3 9 0.80 0.45

11 -3 -9 0.58 0.47  
-11 -3 9 0.51 0.40  
-11 3 9 0.42 0.36  
-11 3 9 0.04 0.38  
11 3 -9 0.71 0.36  
-10 -3 9 0.60 0.36  
10 -3 -9 -0.88 0.41  
-10 3 9 0.31 0.36  
10 3 -9 0.25 0.37  
10 3 -9 -0.03 0.34  
-10 3 9 -0.05 0.34  
-9 -3 9 0.82 0.41  
9 -3 -9 0.43 0.45  
-9 3 9 0.28 0.30  
9 3 -9 0.51 0.35  
9 3 -9 0.37 0.35  
-9 3 9 0.12 0.32  
-8 -3 9 2.67 0.47  
8 -3 -9 1.60 0.50  
8 3 -9 3.07 0.43  
8 3 -9 2.28 0.40  
-8 3 9 2.42 0.41  
-8 3 9 2.79 0.40  
-7 -3 9 1.54 0.38  
7 -3 -9 1.70 0.46  
-7 -3 9 1.88 0.47  
7 3 -9 1.96 0.38  
7 3 -9 1.69 0.42  
-7 3 9 2.14 0.36  
-7 3 9 1.64 0.37  
7 3 -9 2.18 0.38  
-6 -3 9 0.64 0.34  
-6 -3 9 1.15 0.40  
6 -3 -9 0.70 0.44  
-6 3 9 0.68 0.34  
-6 3 9 0.41 0.27  
6 3 -9 0.15 0.28  
6 3 -9 0.96 0.33  
6 3 -9 0.15 0.35  
5 -3 -9 1.57 0.42  
-5 -3 9 1.32 0.33  
-5 -3 9 1.53 0.27  
-5 -3 9 1.35 0.36  
5 3 -9 1.43 0.35  
-5 3 9 1.49 0.31  
-5 3 9 1.86 0.30

|    |    |    |       |      |
|----|----|----|-------|------|
| 5  | 3  | -9 | 1.66  | 0.39 |
| 5  | 3  | -9 | 1.00  | 0.31 |
| 4  | -3 | -9 | 9.25  | 0.71 |
| -4 | -3 | 9  | 9.77  | 0.51 |
| 4  | -3 | -9 | 9.59  | 0.46 |
| -4 | -3 | 9  | 9.02  | 0.63 |
| 4  | 3  | -9 | 8.95  | 0.66 |
| 4  | 3  | -9 | 9.06  | 0.53 |
| 4  | 3  | -9 | 8.65  | 0.59 |
| -4 | 3  | 9  | 8.79  | 0.52 |
| 4  | 3  | -9 | 9.93  | 0.59 |
| -4 | 3  | 9  | 8.92  | 0.47 |
| -3 | -3 | 9  | 0.34  | 0.30 |
| 3  | -3 | -9 | -0.38 | 0.35 |
| 3  | -3 | -9 | 0.19  | 0.22 |
| 3  | 3  | -9 | 0.31  | 0.29 |
| 3  | 3  | -9 | 0.53  | 0.28 |
| 3  | 3  | -9 | -0.13 | 0.27 |
| 3  | 3  | -9 | 0.29  | 0.32 |
| -3 | 3  | 9  | 0.37  | 0.23 |
| -3 | 3  | 9  | 0.70  | 0.30 |
| -2 | -3 | 9  | 10.61 | 0.59 |
| -2 | -3 | 9  | 9.90  | 0.58 |
| 2  | -3 | -9 | 10.55 | 0.53 |
| -2 | -3 | 9  | 10.56 | 0.65 |
| 2  | 3  | -9 | 10.64 | 0.67 |
| 2  | 3  | -9 | 10.24 | 0.50 |
| 2  | 3  | -9 | 10.22 | 0.67 |
| -2 | 3  | 9  | 9.56  | 0.70 |
| -2 | 3  | 9  | 10.68 | 0.53 |
| -1 | -3 | 9  | 45.01 | 1.31 |
| 1  | -3 | -9 | 42.55 | 1.23 |
| -1 | -3 | 9  | 44.48 | 1.25 |
| 1  | 3  | -9 | 43.75 | 1.42 |
| -1 | 3  | 9  | 42.84 | 1.36 |
| 1  | 3  | -9 | 42.68 | 1.11 |
| -1 | 3  | 9  | 44.27 | 1.16 |
| 1  | 3  | -9 | 42.55 | 1.38 |
| 0  | -3 | -9 | 7.75  | 0.53 |
| 0  | -3 | 9  | 7.12  | 0.58 |
| 0  | 3  | -9 | 6.13  | 0.39 |
| 0  | 3  | 9  | 7.59  | 0.64 |
| 0  | 3  | -9 | 6.02  | 0.57 |
| 0  | 3  | 9  | 7.24  | 0.47 |
| 0  | 3  | -9 | 6.38  | 0.50 |
| 0  | 3  | -9 | 7.14  | 0.59 |

1 -3 9 -0.63 0.32  
1 -3 9 -0.07 0.30  
-1 -3 -9 0.04 0.26  
1 3 9 -0.04 0.37  
-1 3 -9 -0.22 0.25  
-1 3 -9 0.44 0.33  
2 -3 9 8.19 0.63  
2 -3 9 6.76 0.59  
-2 -3 -9 9.13 0.59  
-2 3 -9 7.88 0.55  
2 3 9 7.15 0.64  
2 3 9 9.10 0.48  
-3 -3 -9 1.56 0.36  
3 -3 9 1.50 0.39  
3 -3 9 2.67 0.48  
3 3 9 1.81 0.48  
-3 3 -9 1.30 0.33  
4 -3 9 2.47 0.46  
4 -3 9 3.15 0.51  
-4 -3 -9 2.66 0.45  
-4 3 -9 2.11 0.39  
4 3 9 2.06 0.46  
5 -3 9 0.08 0.35  
-5 -3 -9 0.16 0.31  
5 -3 9 0.60 0.41  
-5 3 -9 0.36 0.33  
5 3 9 0.22 0.41  
6 -3 9 0.23 0.47  
-6 -3 -9 0.69 0.38  
6 -3 9 0.51 0.44  
-6 3 -9 0.57 0.38  
6 3 9 -0.13 0.45  
-6 3 -9 0.27 0.38  
7 -3 9 1.95 0.54  
-7 -3 -9 1.77 0.53  
7 -3 9 2.33 0.67  
-7 3 -9 1.37 0.47  
7 3 9 2.04 0.59  
-7 3 -9 1.29 0.47  
-8 -3 -9 0.39 0.48  
8 -3 9 0.62 0.50  
8 -3 9 -0.04 0.55  
-8 3 -9 0.78 0.50  
8 3 9 0.98 0.55  
14 4 -9 -0.72 0.47  
-13 -4 9 1.25 0.50



|     |    |    |       |      |
|-----|----|----|-------|------|
| 13  | -4 | -9 | 0.69  | 0.53 |
| -13 | 4  | 9  | 0.57  | 0.48 |
| 13  | 4  | -9 | 0.85  | 0.44 |
| -12 | -4 | 9  | 1.93  | 0.54 |
| 12  | -4 | -9 | 1.08  | 0.54 |
| -12 | 4  | 9  | 1.05  | 0.46 |
| -12 | 4  | 9  | 1.95  | 0.46 |
| 12  | 4  | -9 | 1.59  | 0.47 |
| 11  | -4 | -9 | -0.40 | 0.44 |
| -11 | -4 | 9  | 0.78  | 0.47 |
| -11 | 4  | 9  | 0.43  | 0.39 |
| -11 | 4  | 9  | 0.05  | 0.38 |
| 11  | 4  | -9 | 0.32  | 0.41 |
| 10  | -4 | -9 | 0.62  | 0.45 |
| -10 | -4 | 9  | 0.51  | 0.39 |
| -10 | 4  | 9  | 0.91  | 0.39 |
| 10  | 4  | -9 | 0.19  | 0.39 |
| -10 | 4  | 9  | 0.23  | 0.33 |
| 9   | -4 | -9 | 0.42  | 0.46 |
| -9  | -4 | 9  | 0.97  | 0.43 |
| -9  | 4  | 9  | 0.83  | 0.34 |
| -9  | 4  | 9  | 0.70  | 0.33 |
| 9   | 4  | -9 | 0.66  | 0.35 |
| 8   | -4 | -9 | 1.06  | 0.47 |
| -8  | -4 | 9  | 0.90  | 0.41 |
| 8   | 4  | -9 | 0.72  | 0.33 |
| -8  | 4  | 9  | 1.04  | 0.34 |
| -8  | 4  | 9  | 1.26  | 0.35 |
| -7  | -4 | 9  | 2.12  | 0.42 |
| 7   | -4 | -9 | 2.68  | 0.53 |
| 7   | 4  | -9 | 2.18  | 0.40 |
| -7  | 4  | 9  | 2.58  | 0.39 |
| 6   | -4 | -9 | 2.89  | 0.55 |
| -6  | -4 | 9  | 1.83  | 0.44 |
| -6  | 4  | 9  | 3.13  | 0.36 |
| 6   | 4  | -9 | 2.10  | 0.36 |
| -6  | 4  | 9  | 2.23  | 0.38 |
| 6   | 4  | -9 | 3.13  | 0.42 |
| -5  | -4 | 9  | 6.51  | 0.43 |
| -5  | -4 | 9  | 6.22  | 0.58 |
| 5   | -4 | -9 | 4.90  | 0.56 |
| 5   | 4  | -9 | 6.76  | 0.54 |
| 5   | 4  | -9 | 4.65  | 0.43 |
| 5   | 4  | -9 | 5.70  | 0.70 |
| -5  | 4  | 9  | 6.78  | 0.46 |
| -5  | 4  | 9  | 5.25  | 0.46 |

-4 -4 9 0.67 0.38  
4 -4 -9 0.18 0.38  
4 -4 -9 0.02 0.22  
-4 -4 9 0.55 0.28  
-4 4 9 0.51 0.23  
4 4 -9 0.37 0.31  
4 4 -9 0.35 0.30  
4 4 -9 0.31 0.26  
-4 4 9 0.46 0.27  
4 4 -9 0.40 0.29  
-3 -4 9 22.46 0.82  
3 -4 -9 26.16 1.05  
-3 -4 9 23.42 0.94  
3 -4 -9 23.42 0.80  
3 4 -9 23.00 0.92  
3 4 -9 24.64 0.83  
3 4 -9 23.40 0.88  
3 4 -9 23.94 0.83  
-3 4 9 22.53 0.81  
-2 -4 9 6.14 0.56  
-2 -4 9 5.17 0.47  
2 -4 -9 5.20 0.44  
-2 -4 9 5.68 0.45  
2 4 -9 5.02 0.50  
-2 4 9 4.83 0.42  
2 4 -9 3.97 0.38  
2 4 -9 5.24 0.46  
-2 4 9 5.32 0.54  
-1 -4 9 0.29 0.30  
-1 -4 9 0.51 0.34  
1 -4 -9 1.05 0.30  
-1 4 9 0.46 0.25  
-1 4 9 0.29 0.33  
1 4 -9 0.57 0.23  
1 4 -9 0.47 0.29  
1 4 -9 0.56 0.32  
0 -4 -9 11.32 0.64  
0 -4 9 12.77 0.71  
0 -4 9 12.42 0.65  
0 4 -9 12.45 0.67  
0 4 9 12.53 0.71  
0 4 -9 12.13 0.74  
0 4 9 12.16 0.58  
0 4 -9 13.49 0.52  
0 4 -9 12.10 0.71  
1 -4 9 12.53 0.69

-1 -4 -9 13.58 0.70  
1 4 9 13.66 0.79  
-1 4 -9 11.95 0.76  
1 4 9 13.20 0.60  
-1 4 -9 11.04 0.63  
2 -4 9 5.13 0.53  
2 -4 9 5.98 0.56  
-2 -4 -9 5.68 0.56  
2 4 9 4.14 0.53  
-2 4 -9 3.56 0.44  
2 4 9 4.87 0.41  
3 -4 9 1.79 0.45  
3 -4 9 3.01 0.47  
-3 -4 -9 2.25 0.44  
3 4 9 2.06 0.49  
-3 4 -9 1.46 0.37  
4 -4 9 0.26 0.35  
4 -4 9 0.17 0.36  
-4 -4 -9 0.06 0.35  
-4 4 -9 0.30 0.34  
4 4 9 0.50 0.39  
5 -4 9 0.45 0.41  
-5 -4 -9 -0.03 0.36  
5 -4 9 -0.19 0.34  
5 4 9 -0.11 0.42  
-5 4 -9 0.14 0.35  
6 -4 9 0.06 0.41  
-6 -4 -9 0.28 0.37  
6 -4 9 -0.58 0.42  
-6 4 -9 0.16 0.39  
6 4 9 0.14 0.47  
-7 -4 -9 1.05 0.50  
7 -4 9 1.77 0.55  
7 -4 9 1.29 0.56  
-7 4 -9 1.25 0.50  
7 4 9 1.29 0.54  
-7 4 -9 1.27 0.49  
-8 -4 -9 0.14 0.53  
8 -4 9 0.03 0.47  
8 -4 9 0.88 0.60  
-8 4 -9 0.14 0.45  
-8 4 -9 0.33 0.49  
-13 -5 9 0.35 0.52  
13 -5 -9 0.57 0.58  
-13 5 9 0.51 0.46  
13 5 -9 0.19 0.44

|     |    |    |      |      |
|-----|----|----|------|------|
| 12  | -5 | -9 | 0.67 | 0.53 |
| -12 | -5 | 9  | 0.25 | 0.43 |
| -12 | 5  | 9  | 1.03 | 0.47 |
| -12 | 5  | 9  | 0.31 | 0.38 |
| 12  | 5  | -9 | 1.23 | 0.50 |
| -11 | -5 | 9  | 0.03 | 0.45 |
| 11  | -5 | -9 | 0.84 | 0.51 |
| 11  | 5  | -9 | 0.17 | 0.38 |
| -11 | 5  | 9  | 0.13 | 0.41 |
| -11 | 5  | 9  | 0.59 | 0.40 |
| 10  | -5 | -9 | 1.72 | 0.48 |
| -10 | -5 | 9  | 1.93 | 0.46 |
| -10 | 5  | 9  | 1.75 | 0.42 |
| 10  | 5  | -9 | 1.54 | 0.41 |
| -10 | 5  | 9  | 2.52 | 0.43 |
| 9   | -5 | -9 | 0.67 | 0.50 |
| -9  | -5 | 9  | 1.07 | 0.40 |
| 9   | 5  | -9 | 1.32 | 0.38 |
| -9  | 5  | 9  | 1.06 | 0.37 |
| -9  | 5  | 9  | 1.55 | 0.43 |
| 8   | -5 | -9 | 3.08 | 0.57 |
| -8  | -5 | 9  | 1.97 | 0.44 |
| -8  | 5  | 9  | 2.36 | 0.41 |
| 8   | 5  | -9 | 2.16 | 0.42 |
| 7   | -5 | -9 | 1.49 | 0.47 |
| -7  | -5 | 9  | 1.37 | 0.43 |
| -7  | 5  | 9  | 1.73 | 0.35 |
| 7   | 5  | -9 | 2.32 | 0.39 |
| -7  | 5  | 9  | 1.72 | 0.37 |
| -6  | -5 | 9  | 0.21 | 0.38 |
| -6  | -5 | 9  | 0.81 | 0.26 |
| 6   | -5 | -9 | 0.49 | 0.41 |
| -6  | 5  | 9  | 0.39 | 0.26 |
| -6  | 5  | 9  | 0.77 | 0.31 |
| 6   | 5  | -9 | 0.73 | 0.32 |
| 5   | -5 | -9 | 1.15 | 0.43 |
| -5  | -5 | 9  | 1.49 | 0.29 |
| -5  | -5 | 9  | 1.46 | 0.39 |
| -5  | 5  | 9  | 1.27 | 0.32 |
| 5   | 5  | -9 | 1.28 | 0.35 |
| 4   | -5 | -9 | 2.77 | 0.49 |
| -4  | -5 | 9  | 2.03 | 0.41 |
| 4   | -5 | -9 | 1.70 | 0.32 |
| -4  | 5  | 9  | 2.23 | 0.36 |
| 4   | 5  | -9 | 1.53 | 0.33 |
| 3   | -5 | -9 | 4.53 | 0.42 |

|    |    |    |       |      |
|----|----|----|-------|------|
| 3  | -5 | -9 | 3.64  | 0.52 |
| -3 | -5 | 9  | 3.13  | 0.45 |
| -3 | -5 | 9  | 4.25  | 0.44 |
| 3  | 5  | -9 | 3.45  | 0.39 |
| -3 | 5  | 9  | 4.47  | 0.42 |
| -2 | -5 | 9  | 0.29  | 0.32 |
| -2 | -5 | 9  | 0.48  | 0.32 |
| 2  | -5 | -9 | 0.35  | 0.28 |
| -2 | 5  | 9  | 0.26  | 0.26 |
| -2 | 5  | 9  | 1.15  | 0.41 |
| 2  | 5  | -9 | 0.19  | 0.26 |
| 1  | -5 | -9 | 4.14  | 0.45 |
| -1 | -5 | 9  | 4.44  | 0.42 |
| -1 | -5 | 9  | 3.67  | 0.46 |
| 1  | 5  | -9 | 4.27  | 0.37 |
| -1 | 5  | 9  | 3.94  | 0.40 |
| -1 | 5  | 9  | 3.92  | 0.54 |
| 0  | -5 | -9 | 20.03 | 0.84 |
| 0  | -5 | 9  | 19.16 | 0.82 |
| 0  | -5 | 9  | 19.54 | 0.78 |
| 0  | 5  | 9  | 18.97 | 0.74 |
| 0  | 5  | -9 | 18.63 | 0.84 |
| 0  | 5  | -9 | 18.62 | 0.65 |
| 0  | 5  | 9  | 19.74 | 0.92 |
| -1 | -5 | -9 | 4.06  | 0.49 |
| 1  | -5 | 9  | 4.50  | 0.54 |
| 1  | -5 | 9  | 4.72  | 0.47 |
| 1  | 5  | 9  | 3.52  | 0.52 |
| -1 | 5  | -9 | 4.78  | 0.49 |
| 1  | 5  | 9  | 5.18  | 0.44 |
| -2 | -5 | -9 | 1.41  | 0.41 |
| 2  | -5 | 9  | 2.20  | 0.47 |
| 2  | 5  | 9  | 2.41  | 0.52 |
| -2 | 5  | -9 | 1.08  | 0.35 |
| -3 | -5 | -9 | 0.23  | 0.32 |
| 3  | -5 | 9  | 0.04  | 0.38 |
| 3  | -5 | 9  | 0.79  | 0.38 |
| 3  | 5  | 9  | 0.00  | 0.42 |
| -3 | 5  | -9 | 0.26  | 0.33 |
| 3  | 5  | 9  | 0.35  | 0.25 |
| 4  | -5 | 9  | 0.86  | 0.42 |
| -4 | -5 | -9 | 1.59  | 0.44 |
| 4  | -5 | 9  | 1.04  | 0.42 |
| -4 | 5  | -9 | 1.01  | 0.39 |
| 4  | 5  | 9  | 1.62  | 0.51 |
| -5 | -5 | -9 | 0.51  | 0.42 |

5 -5 9 0.98 0.42  
5 -5 9 0.59 0.43  
5 5 9 1.41 0.46  
-5 5 -9 0.28 0.38  
6 -5 9 0.85 0.48  
6 -5 9 1.10 0.49  
-6 -5 -9 0.20 0.45  
6 5 9 0.64 0.53  
-6 5 -9 -0.07 0.40  
7 -5 9 1.14 0.55  
7 -5 9 0.08 0.48  
-7 -5 -9 0.98 0.47  
-7 5 -9 0.18 0.38  
7 5 9 1.20 0.56  
8 -5 9 0.80 0.51  
-8 5 -9 0.32 0.47  
-13 -6 9 0.27 0.52  
-13 6 9 -0.18 0.42  
13 6 -9 0.21 0.50  
12 -6 -9 -0.11 0.49  
-12 -6 9 0.34 0.51  
12 6 -9 0.94 0.47  
-12 6 9 0.73 0.47  
-12 6 9 0.17 0.41  
11 -6 -9 0.89 0.52  
-11 -6 9 0.14 0.47  
11 6 -9 0.05 0.40  
-11 6 9 0.52 0.44  
-11 6 9 0.64 0.40  
-10 -6 9 -0.15 0.37  
10 -6 -9 0.53 0.51  
-10 6 9 0.54 0.42  
-10 6 9 0.15 0.34  
10 6 -9 0.16 0.38  
-9 -6 9 2.87 0.49  
9 -6 -9 2.83 0.58  
9 6 -9 2.78 0.50  
-9 6 9 2.77 0.49  
-9 6 9 2.48 0.41  
-8 -6 9 0.45 0.36  
8 -6 -9 0.05 0.39  
-8 6 9 0.05 0.32  
-8 6 9 0.31 0.33  
8 6 -9 -0.18 0.34  
-7 -6 9 2.13 0.46  
7 -6 -9 2.66 0.53

|    |    |    |       |      |
|----|----|----|-------|------|
| 7  | 6  | -9 | 2.25  | 0.45 |
| -7 | 6  | 9  | 2.47  | 0.44 |
| -6 | -6 | 9  | -0.09 | 0.31 |
| -6 | -6 | 9  | 0.06  | 0.26 |
| 6  | -6 | -9 | -0.04 | 0.36 |
| -6 | 6  | 9  | -0.15 | 0.28 |
| 6  | 6  | -9 | 0.47  | 0.32 |
| -5 | -6 | 9  | 4.69  | 0.54 |
| 5  | -6 | -9 | 3.56  | 0.52 |
| -5 | -6 | 9  | 4.43  | 0.43 |
| 5  | 6  | -9 | 4.58  | 0.47 |
| -5 | 6  | 9  | 5.39  | 0.50 |
| 4  | -6 | -9 | 3.24  | 0.54 |
| -4 | -6 | 9  | 3.44  | 0.40 |
| -4 | -6 | 9  | 3.43  | 0.51 |
| 4  | -6 | -9 | 3.28  | 0.42 |
| -4 | 6  | 9  | 2.71  | 0.39 |
| 4  | 6  | -9 | 3.74  | 0.43 |
| 3  | -6 | -9 | 0.85  | 0.42 |
| -3 | -6 | 9  | 0.75  | 0.33 |
| -3 | -6 | 9  | 1.03  | 0.37 |
| 3  | -6 | -9 | 0.87  | 0.32 |
| 3  | 6  | -9 | 1.01  | 0.32 |
| -3 | 6  | 9  | 1.04  | 0.33 |
| -2 | -6 | 9  | 26.42 | 1.02 |
| 2  | -6 | -9 | 25.62 | 0.94 |
| 2  | 6  | -9 | 26.86 | 0.87 |
| -2 | 6  | 9  | 26.57 | 0.90 |
| -1 | -6 | 9  | 11.22 | 0.69 |
| 1  | -6 | -9 | 11.51 | 0.66 |
| -1 | 6  | 9  | 10.07 | 0.75 |
| 1  | 6  | -9 | 10.99 | 0.54 |
| 1  | 6  | -9 | 12.37 | 0.72 |
| -1 | 6  | 9  | 11.67 | 0.62 |
| 0  | -6 | -9 | 2.55  | 0.43 |
| 0  | -6 | 9  | 2.52  | 0.45 |
| 0  | 6  | 9  | 2.93  | 0.52 |
| 0  | 6  | -9 | 2.25  | 0.39 |
| 0  | 6  | 9  | 2.65  | 0.37 |
| 1  | -6 | 9  | 12.32 | 0.76 |
| -1 | -6 | -9 | 13.05 | 0.75 |
| 1  | 6  | 9  | 12.62 | 0.61 |
| 1  | 6  | 9  | 12.78 | 0.80 |
| -1 | 6  | -9 | 11.93 | 0.75 |
| -2 | -6 | -9 | 0.60  | 0.38 |
| 2  | -6 | 9  | 1.37  | 0.44 |

|     |    |    |       |      |
|-----|----|----|-------|------|
| 2   | 6  | 9  | 1.45  | 0.33 |
| -2  | 6  | -9 | 1.27  | 0.39 |
| 2   | 6  | 9  | 0.95  | 0.43 |
| 3   | -6 | 9  | 7.30  | 0.73 |
| 3   | -6 | 9  | 5.44  | 0.60 |
| -3  | -6 | -9 | 6.14  | 0.60 |
| 3   | 6  | 9  | 6.43  | 0.69 |
| -3  | 6  | -9 | 6.37  | 0.61 |
| -4  | -6 | -9 | 0.28  | 0.36 |
| 4   | -6 | 9  | 0.59  | 0.39 |
| -4  | 6  | -9 | 0.18  | 0.38 |
| 4   | 6  | 9  | 0.70  | 0.49 |
| 5   | -6 | 9  | 0.05  | 0.44 |
| 5   | -6 | 9  | 0.22  | 0.41 |
| -5  | -6 | -9 | 0.24  | 0.43 |
| 5   | 6  | 9  | 0.40  | 0.49 |
| -5  | 6  | -9 | 0.01  | 0.38 |
| 6   | -6 | 9  | 0.94  | 0.47 |
| 6   | -6 | 9  | 1.22  | 0.52 |
| -6  | -6 | -9 | 0.49  | 0.43 |
| -6  | 6  | -9 | 0.95  | 0.48 |
| 6   | 6  | 9  | 1.86  | 0.60 |
| 7   | -6 | 9  | 0.80  | 0.49 |
| -7  | -6 | -9 | 0.11  | 0.44 |
| 7   | -6 | 9  | 1.75  | 0.54 |
| -7  | 6  | -9 | 1.07  | 0.50 |
| 7   | 6  | 9  | 0.59  | 0.56 |
| 8   | -6 | 9  | 0.34  | 0.52 |
| -13 | 7  | 9  | -0.66 | 0.43 |
| -12 | -7 | 9  | 1.05  | 0.55 |
| 12  | -7 | -9 | 0.17  | 0.49 |
| 12  | 7  | -9 | -0.03 | 0.49 |
| -12 | 7  | 9  | 0.57  | 0.44 |
| -11 | -7 | 9  | 0.03  | 0.50 |
| 11  | -7 | -9 | 0.03  | 0.50 |
| -11 | 7  | 9  | -0.05 | 0.41 |
| 11  | 7  | -9 | -0.29 | 0.45 |
| -11 | 7  | 9  | 0.00  | 0.39 |
| -10 | -7 | 9  | 0.54  | 0.47 |
| 10  | -7 | -9 | 0.68  | 0.47 |
| -10 | 7  | 9  | 0.19  | 0.40 |
| -10 | 7  | 9  | 0.16  | 0.36 |
| 10  | 7  | -9 | -0.03 | 0.39 |
| 9   | -7 | -9 | -0.63 | 0.44 |
| -9  | -7 | 9  | -0.22 | 0.41 |
| 9   | 7  | -9 | -0.24 | 0.34 |



-9 7 9 0.40 0.40  
8 -7 -9 1.51 0.51  
-8 -7 9 0.89 0.43  
-8 7 9 1.04 0.42  
8 7 -9 1.73 0.43  
-7 -7 9 1.02 0.42  
7 -7 -9 0.34 0.46  
7 7 -9 0.17 0.38  
-7 7 9 0.40 0.33  
-6 -7 9 3.65 0.50  
6 -7 -9 2.13 0.55  
-6 -7 9 3.50 0.41  
-6 7 9 3.66 0.51  
6 7 -9 3.20 0.45  
-5 -7 9 1.08 0.43  
5 -7 -9 0.66 0.44  
5 7 -9 0.80 0.33  
-5 7 9 1.09 0.35  
-4 -7 9 1.10 0.34  
4 -7 -9 0.26 0.38  
4 -7 -9 0.78 0.37  
-4 -7 9 0.87 0.38  
4 7 -9 0.70 0.34  
-4 7 9 0.54 0.30  
-3 -7 9 5.65 0.60  
-3 -7 9 3.93 0.46  
3 -7 -9 5.24 0.62  
3 -7 -9 5.07 0.52  
-3 7 9 4.35 0.47  
3 7 -9 4.46 0.44  
2 -7 -9 0.88 0.36  
-2 -7 9 1.28 0.38  
2 -7 -9 0.84 0.43  
-2 -7 9 1.18 0.39  
-2 7 9 1.59 0.36  
2 7 -9 1.12 0.31  
-1 -7 9 2.31 0.44  
1 -7 -9 1.05 0.40  
-1 7 9 2.41 0.48  
-1 7 9 1.73 0.37  
1 7 -9 1.55 0.31  
1 7 -9 1.43 0.40  
0 -7 -9 4.34 0.53  
0 -7 9 3.45 0.51  
0 7 -9 2.90 0.45  
0 7 9 4.63 0.48

0 7 9 3.69 0.53  
1 -7 9 0.24 0.37  
-1 -7 -9 -0.02 0.34  
1 7 9 -0.45 0.39  
-1 7 -9 0.30 0.35  
1 7 9 0.40 0.27  
-2 -7 -9 1.00 0.42  
2 -7 9 0.73 0.37  
2 7 9 0.90 0.46  
-2 7 -9 1.14 0.37  
2 7 9 1.10 0.31  
-3 -7 -9 -0.42 0.32  
3 -7 9 0.35 0.41  
3 7 9 0.06 0.41  
3 7 9 0.01 0.29  
-3 7 -9 -0.53 0.29  
4 -7 9 2.00 0.51  
-4 -7 -9 2.06 0.53  
-4 7 -9 0.93 0.44  
4 7 9 0.78 0.51  
-5 -7 -9 0.17 0.45  
5 -7 9 0.21 0.43  
5 7 9 -0.15 0.49  
-5 7 -9 0.35 0.44  
-6 -7 -9 -0.50 0.45  
6 -7 9 -0.17 0.47  
6 7 9 0.23 0.53  
-6 7 -9 0.03 0.39  
7 7 9 0.94 0.67  
-7 7 -9 1.01 0.54  
-12 -8 9 -0.20 0.45  
12 8 -9 -0.61 0.42  
11 -8 -9 1.78 0.58  
-11 -8 9 1.46 0.50  
-11 8 9 1.80 0.53  
11 8 -9 1.67 0.57  
-10 -8 9 0.95 0.52  
10 -8 -9 -0.08 0.50  
-10 8 9 0.25 0.45  
10 8 -9 0.09 0.41  
9 -8 -9 0.97 0.57  
-9 -8 9 -0.12 0.41  
9 8 -9 0.69 0.42  
-9 8 9 0.20 0.36  
-8 -8 9 0.87 0.45  
8 -8 -9 0.33 0.49

8 8 -9 0.51 0.39  
-8 8 9 1.05 0.45  
7 -8 -9 -0.27 0.47  
-7 -8 9 0.20 0.42  
-7 8 9 0.97 0.39  
7 8 -9 -0.23 0.34  
-6 -8 9 -0.45 0.38  
6 -8 -9 0.36 0.45  
6 8 -9 -0.28 0.31  
-6 8 9 0.61 0.35  
5 -8 -9 2.26 0.49  
-5 -8 9 1.46 0.37  
-5 -8 9 3.02 0.52  
-5 8 9 0.98 0.36  
5 8 -9 2.41 0.46  
-4 -8 9 0.38 0.33  
4 -8 -9 -0.20 0.36  
-4 -8 9 0.20 0.38  
4 -8 -9 -0.07 0.35  
-4 8 9 0.21 0.30  
4 8 -9 0.05 0.34  
3 -8 -9 4.02 0.55  
-3 -8 9 4.46 0.57  
3 -8 -9 3.69 0.52  
-3 -8 9 3.25 0.47  
3 8 -9 3.31 0.42  
-3 8 9 4.52 0.49  
2 -8 -9 8.79 0.69  
2 -8 -9 10.98 0.86  
2 8 -9 9.68 0.59  
-2 8 9 9.33 0.64  
-1 -8 9 1.52 0.43  
1 -8 -9 0.37 0.39  
1 8 -9 1.06 0.31  
1 8 -9 1.11 0.42  
-1 8 9 1.78 0.36  
0 -8 9 3.66 0.53  
0 -8 -9 3.49 0.50  
0 8 -9 3.63 0.51  
0 8 9 3.50 0.52  
0 8 9 3.28 0.43  
-1 -8 -9 1.19 0.46  
1 -8 9 1.80 0.43  
1 8 9 1.64 0.38  
-1 8 -9 1.86 0.43  
1 8 9 1.58 0.45

2 -8 9 0.09 0.36  
-2 -8 -9 0.26 0.40  
-2 8 -9 0.05 0.37  
2 8 9 -0.17 0.40  
2 8 9 0.56 0.32  
3 -8 9 0.14 0.43  
-3 -8 -9 0.60 0.46  
-3 8 -9 0.10 0.35  
3 8 9 0.36 0.32  
3 8 9 1.21 0.49  
-4 -8 -9 0.99 0.49  
4 -8 9 2.74 0.52  
-4 8 -9 2.37 0.49  
4 8 9 2.07 0.54  
-5 -8 -9 0.48 0.44  
5 -8 9 1.45 0.55  
5 8 9 0.86 0.53  
-5 8 -9 0.86 0.48  
-6 -8 -9 0.38 0.53  
6 -8 9 0.26 0.45  
-6 8 -9 0.09 0.42  
6 8 9 0.88 0.57  
11 -9 -9 -0.49 0.52  
-11 -9 9 0.26 0.50  
-11 9 9 -0.27 0.46  
11 9 -9 -0.47 0.43  
10 -9 -9 -0.59 0.51  
-10 -9 9 -0.11 0.39  
10 9 -9 -0.16 0.43  
-10 9 9 -0.02 0.43  
9 -9 -9 0.28 0.54  
-9 -9 9 0.84 0.44  
-9 9 9 0.57 0.48  
9 9 -9 0.07 0.41  
8 -9 -9 0.08 0.53  
-8 -9 9 0.75 0.49  
8 9 -9 0.05 0.38  
-8 9 9 1.16 0.48  
-7 -9 9 0.24 0.43  
7 -9 -9 -0.40 0.42  
-7 9 9 0.40 0.39  
7 9 -9 -0.18 0.36  
-6 -9 9 0.35 0.38  
-6 -9 9 1.00 0.37  
6 -9 -9 0.53 0.49  
-6 9 9 0.12 0.36

|    |    |    |       |      |
|----|----|----|-------|------|
| 6  | 9  | -9 | 0.76  | 0.43 |
| -5 | -9 | 9  | 1.22  | 0.41 |
| 5  | -9 | -9 | 1.13  | 0.52 |
| -5 | -9 | 9  | 0.67  | 0.35 |
| 5  | 9  | -9 | 0.73  | 0.40 |
| -5 | 9  | 9  | 1.52  | 0.40 |
| 4  | -9 | -9 | 2.69  | 0.55 |
| -4 | -9 | 9  | 2.16  | 0.50 |
| 4  | -9 | -9 | 2.62  | 0.51 |
| -4 | -9 | 9  | 1.51  | 0.38 |
| 4  | 9  | -9 | 1.61  | 0.40 |
| -4 | 9  | 9  | 1.88  | 0.41 |
| 3  | -9 | -9 | 0.94  | 0.46 |
| 3  | -9 | -9 | 0.31  | 0.43 |
| -3 | -9 | 9  | 0.71  | 0.34 |
| -3 | -9 | 9  | -0.07 | 0.38 |
| -3 | 9  | 9  | 0.85  | 0.35 |
| 3  | 9  | -9 | 1.01  | 0.34 |
| 2  | -9 | -9 | 0.30  | 0.42 |
| -2 | -9 | 9  | 0.72  | 0.38 |
| 2  | -9 | -9 | 0.67  | 0.42 |
| 2  | 9  | -9 | 0.76  | 0.36 |
| -2 | 9  | 9  | 1.19  | 0.39 |
| 2  | 9  | -9 | 0.57  | 0.36 |
| -1 | -9 | 9  | 4.77  | 0.54 |
| 1  | -9 | -9 | 4.53  | 0.61 |
| 1  | -9 | -9 | 4.36  | 0.57 |
| 1  | 9  | -9 | 4.57  | 0.55 |
| -1 | 9  | 9  | 5.28  | 0.53 |
| 0  | -9 | -9 | 0.31  | 0.41 |
| 0  | -9 | 9  | 0.87  | 0.42 |
| 0  | 9  | 9  | 0.56  | 0.31 |
| 0  | 9  | 9  | 0.35  | 0.43 |
| 0  | 9  | -9 | 0.24  | 0.33 |
| 1  | -9 | 9  | 2.00  | 0.45 |
| -1 | -9 | -9 | 1.74  | 0.47 |
| 1  | 9  | 9  | 1.77  | 0.37 |
| 1  | 9  | 9  | 1.82  | 0.51 |
| -1 | 9  | -9 | 1.34  | 0.42 |
| 2  | -9 | 9  | 0.31  | 0.39 |
| -2 | -9 | -9 | -0.06 | 0.44 |
| 2  | 9  | 9  | 0.73  | 0.46 |
| -2 | 9  | -9 | 0.00  | 0.34 |
| 2  | 9  | 9  | 0.73  | 0.33 |
| -3 | -9 | -9 | 0.35  | 0.48 |
| 3  | -9 | 9  | 0.75  | 0.49 |

3 9 9 0.73 0.36  
3 9 9 1.67 0.55  
-3 9 -9 0.14 0.37  
4 -9 9 0.64 0.44  
-4 -9 -9 0.06 0.44  
4 9 9 0.01 0.50  
-4 9 -9 0.37 0.45  
5 -9 9 2.46 0.61  
-5 -9 -9 1.98 0.64  
5 9 9 2.11 0.60  
-5 9 -9 2.44 0.58  
6 9 9 0.44 0.58  
-10 -10 9 0.55 0.52  
10 -10 -9 -0.04 0.52  
10 10 -9 -0.30 0.45  
-10 10 9 -0.43 0.47  
9 -10 -9 1.92 0.65  
-9 -10 9 1.26 0.52  
-9 10 9 1.71 0.55  
9 10 -9 1.25 0.52  
-8 -10 9 -0.17 0.40  
8 -10 -9 -0.23 0.53  
8 10 -9 1.02 0.48  
-8 10 9 -0.22 0.44  
-7 -10 9 -0.65 0.41  
7 -10 -9 -0.07 0.49  
7 10 -9 -0.08 0.39  
-7 10 9 0.46 0.43  
-6 -10 9 0.96 0.39  
6 -10 -9 0.96 0.56  
-6 -10 9 -0.08 0.36  
-6 10 9 0.82 0.42  
6 10 -9 0.60 0.47  
-5 -10 9 0.70 0.41  
-5 -10 9 0.90 0.41  
5 -10 -9 0.86 0.54  
5 10 -9 1.01 0.45  
-5 10 9 1.26 0.42  
4 -10 -9 1.05 0.51  
-4 -10 9 0.58 0.39  
-4 -10 9 0.72 0.39  
-4 10 9 0.40 0.40  
4 10 -9 0.52 0.37  
3 -10 -9 0.70 0.48  
-3 -10 9 0.52 0.40  
-3 -10 9 0.99 0.46

|     |     |    |       |      |
|-----|-----|----|-------|------|
| 3   | -10 | -9 | 1.01  | 0.48 |
| -3  | 10  | 9  | 0.57  | 0.40 |
| 3   | 10  | -9 | 1.22  | 0.37 |
| 2   | -10 | -9 | 0.55  | 0.45 |
| -2  | -10 | 9  | 0.87  | 0.42 |
| 2   | -10 | -9 | 0.00  | 0.44 |
| 2   | 10  | -9 | 0.27  | 0.40 |
| 2   | 10  | -9 | 0.57  | 0.36 |
| -2  | 10  | 9  | 0.42  | 0.39 |
| -1  | -10 | 9  | -0.07 | 0.34 |
| 1   | -10 | -9 | -0.54 | 0.43 |
| 1   | -10 | -9 | -0.03 | 0.41 |
| 1   | 10  | -9 | -0.14 | 0.39 |
| -1  | 10  | 9  | 0.48  | 0.34 |
| 0   | -10 | -9 | 3.58  | 0.59 |
| 0   | -10 | -9 | 3.02  | 0.55 |
| 0   | -10 | 9  | 2.38  | 0.52 |
| 0   | 10  | -9 | 2.93  | 0.52 |
| 0   | 10  | 9  | 3.28  | 0.51 |
| 1   | -10 | 9  | 0.83  | 0.47 |
| -1  | -10 | -9 | -0.47 | 0.44 |
| -1  | 10  | -9 | 0.72  | 0.45 |
| 1   | 10  | 9  | 0.46  | 0.37 |
| 1   | 10  | 9  | 0.27  | 0.48 |
| -2  | -10 | -9 | 0.66  | 0.52 |
| 2   | -10 | 9  | 0.72  | 0.44 |
| 2   | 10  | 9  | 0.43  | 0.48 |
| 2   | 10  | 9  | 1.10  | 0.40 |
| -2  | 10  | -9 | 0.91  | 0.42 |
| -3  | -10 | -9 | -0.62 | 0.43 |
| 3   | -10 | 9  | 0.37  | 0.46 |
| 3   | 10  | 9  | 0.42  | 0.51 |
| 3   | 10  | 9  | 0.17  | 0.36 |
| -3  | 10  | -9 | 0.10  | 0.44 |
| -4  | -10 | -9 | 1.13  | 0.62 |
| 4   | -10 | 9  | 1.05  | 0.54 |
| -4  | 10  | -9 | 0.88  | 0.52 |
| 4   | 10  | 9  | 2.18  | 0.45 |
| 4   | 10  | 9  | 1.14  | 0.57 |
| 5   | 10  | 9  | 1.83  | 0.61 |
| -10 | 11  | 9  | -0.16 | 0.42 |
| -9  | -11 | 9  | 0.56  | 0.51 |
| 9   | -11 | -9 | -0.53 | 0.57 |
| -9  | 11  | 9  | 0.47  | 0.51 |
| 9   | 11  | -9 | -0.04 | 0.45 |
| -8  | -11 | 9  | 0.09  | 0.40 |

|    |     |    |       |      |
|----|-----|----|-------|------|
| 8  | -11 | -9 | 0.24  | 0.59 |
| -8 | 11  | 9  | 0.94  | 0.46 |
| 8  | 11  | -9 | 0.39  | 0.52 |
| 7  | -11 | -9 | -1.11 | 0.50 |
| -7 | -11 | 9  | 0.53  | 0.48 |
| 7  | 11  | -9 | -0.17 | 0.47 |
| -7 | 11  | 9  | -0.57 | 0.46 |
| -6 | -11 | 9  | -0.05 | 0.37 |
| -6 | -11 | 9  | 0.16  | 0.45 |
| 6  | -11 | -9 | -0.32 | 0.51 |
| -6 | 11  | 9  | -0.13 | 0.39 |
| 6  | 11  | -9 | -0.12 | 0.46 |
| 5  | -11 | -9 | 0.55  | 0.53 |
| -5 | -11 | 9  | 0.61  | 0.46 |
| -5 | -11 | 9  | 1.17  | 0.47 |
| -5 | 11  | 9  | 1.18  | 0.46 |
| 5  | 11  | -9 | 1.63  | 0.51 |
| -4 | -11 | 9  | -0.40 | 0.41 |
| -4 | -11 | 9  | 0.57  | 0.42 |
| 4  | -11 | -9 | -0.32 | 0.49 |
| -4 | 11  | 9  | -0.11 | 0.43 |
| 4  | 11  | -9 | 0.23  | 0.43 |
| -3 | -11 | 9  | 0.39  | 0.42 |
| 3  | -11 | -9 | 0.31  | 0.49 |
| 3  | -11 | -9 | -0.52 | 0.45 |
| -3 | 11  | 9  | 0.05  | 0.38 |
| 3  | 11  | -9 | 0.80  | 0.47 |
| 3  | 11  | -9 | 0.70  | 0.43 |
| -2 | -11 | 9  | 1.71  | 0.50 |
| 2  | -11 | -9 | 0.94  | 0.51 |
| 2  | -11 | -9 | 0.29  | 0.51 |
| -2 | 11  | 9  | 1.30  | 0.43 |
| 2  | 11  | -9 | 0.54  | 0.40 |
| 2  | 11  | -9 | 0.65  | 0.40 |
| 1  | -11 | -9 | 1.11  | 0.54 |
| -1 | -11 | 9  | 0.85  | 0.43 |
| 1  | -11 | -9 | 0.98  | 0.51 |
| -1 | 11  | 9  | 1.22  | 0.41 |
| 1  | 11  | -9 | 1.72  | 0.51 |
| 0  | -11 | -9 | -0.73 | 0.49 |
| 0  | -11 | 9  | 0.23  | 0.46 |
| 0  | -11 | -9 | 0.36  | 0.46 |
| 0  | 11  | 9  | -0.11 | 0.34 |
| 0  | 11  | -9 | 0.49  | 0.45 |
| -1 | -11 | -9 | 0.70  | 0.56 |
| 1  | -11 | 9  | 1.09  | 0.52 |



-1 11 -9 1.06 0.48  
1 11 9 0.56 0.41  
2 -11 9 0.70 0.51  
-2 -11 -9 -0.54 0.45  
2 11 9 -0.48 0.37  
-2 11 -9 -0.60 0.39  
2 11 9 -0.58 0.48  
-3 -11 -9 0.61 0.60  
3 -11 9 0.37 0.51  
3 11 9 0.56 0.42  
-3 11 -9 0.56 0.43  
3 11 9 1.35 0.57  
4 11 9 0.22 0.57  
4 11 9 0.81 0.42  
-9 12 9 0.44 0.54  
8 -12 -9 0.16 0.61  
-8 -12 9 0.57 0.51  
8 12 -9 0.80 0.55  
-8 12 9 0.60 0.49  
-7 -12 9 0.43 0.48  
7 -12 -9 -0.36 0.55  
-7 12 9 -0.28 0.42  
7 12 -9 -0.09 0.52  
-6 -12 9 0.65 0.44  
6 -12 -9 1.30 0.64  
-6 -12 9 1.42 0.49  
-6 12 9 0.51 0.50  
6 12 -9 0.61 0.48  
-5 -12 9 -0.25 0.46  
-5 -12 9 0.54 0.45  
5 -12 -9 -0.94 0.52  
5 12 -9 -0.40 0.39  
-5 12 9 0.15 0.50  
-4 -12 9 0.55 0.44  
4 -12 -9 -0.73 0.51  
4 12 -9 -0.20 0.44  
-4 12 9 -0.09 0.48  
-3 -12 9 1.77 0.48  
3 -12 -9 1.74 0.63  
3 -12 -9 2.15 0.63  
-3 12 9 1.77 0.52  
3 12 -9 1.97 0.52  
3 12 -9 1.75 0.49  
-2 -12 9 0.16 0.45  
2 -12 -9 -0.18 0.49  
2 -12 -9 -1.09 0.48

|    |     |    |       |      |
|----|-----|----|-------|------|
| 2  | 12  | -9 | -0.02 | 0.45 |
| -2 | 12  | 9  | 0.01  | 0.40 |
| 1  | -12 | -9 | -0.48 | 0.52 |
| 1  | -12 | -9 | 0.68  | 0.53 |
| -1 | -12 | 9  | 0.80  | 0.50 |
| 1  | 12  | -9 | 0.65  | 0.47 |
| -1 | 12  | 9  | 1.23  | 0.45 |
| 0  | -12 | -9 | -0.21 | 0.54 |
| 0  | -12 | -9 | 0.38  | 0.50 |
| 0  | -12 | 9  | 0.24  | 0.43 |
| 0  | 12  | 9  | 0.12  | 0.38 |
| 0  | 12  | -9 | -0.25 | 0.38 |
| 1  | -12 | 9  | 0.48  | 0.51 |
| -1 | -12 | -9 | -0.58 | 0.47 |
| -1 | -12 | -9 | 0.87  | 0.53 |
| 1  | 12  | 9  | 0.11  | 0.41 |
| -1 | 12  | -9 | -0.40 | 0.46 |
| -2 | -12 | -9 | 1.89  | 0.70 |
| 2  | -12 | 9  | 1.91  | 0.61 |
| 2  | 12  | 9  | 1.72  | 0.51 |
| -2 | 12  | -9 | 2.79  | 0.61 |
| 3  | 12  | 9  | -0.51 | 0.56 |
| 3  | 12  | 9  | 0.77  | 0.45 |
| 7  | -13 | -9 | -0.66 | 0.57 |
| -7 | -13 | 9  | 0.14  | 0.49 |
| -7 | 13  | 9  | -0.27 | 0.43 |
| -6 | -13 | 9  | -0.01 | 0.48 |
| 6  | -13 | -9 | -0.34 | 0.61 |
| -6 | -13 | 9  | 0.42  | 0.50 |
| 6  | 13  | -9 | -0.61 | 0.43 |
| -6 | 13  | 9  | -0.28 | 0.50 |
| 5  | -13 | -9 | 0.32  | 0.61 |
| -5 | -13 | 9  | 0.94  | 0.51 |
| -5 | -13 | 9  | 0.62  | 0.52 |
| -5 | 13  | 9  | 0.84  | 0.50 |
| 5  | 13  | -9 | 0.30  | 0.51 |
| 4  | -13 | -9 | -0.81 | 0.52 |
| -4 | -13 | 9  | 0.10  | 0.44 |
| 4  | 13  | -9 | -0.06 | 0.50 |
| 4  | 13  | -9 | 0.55  | 0.51 |
| -4 | 13  | 9  | 0.52  | 0.47 |
| -3 | -13 | 9  | 0.83  | 0.51 |
| 3  | -13 | -9 | 0.31  | 0.59 |
| 3  | 13  | -9 | 1.51  | 0.54 |
| -3 | 13  | 9  | 0.30  | 0.45 |
| 3  | 13  | -9 | -0.04 | 0.48 |

|     |     |     |       |      |
|-----|-----|-----|-------|------|
| 2   | -13 | -9  | 2.17  | 0.65 |
| 2   | -13 | -9  | 1.80  | 0.65 |
| -2  | -13 | 9   | 1.85  | 0.57 |
| 2   | 13  | -9  | 2.01  | 0.58 |
| -2  | 13  | 9   | 1.45  | 0.52 |
| 1   | -13 | -9  | -0.36 | 0.62 |
| -1  | -13 | 9   | 0.02  | 0.43 |
| 1   | -13 | -9  | -0.24 | 0.59 |
| 1   | 13  | -9  | -0.22 | 0.42 |
| -1  | 13  | 9   | -0.11 | 0.44 |
| 0   | -13 | -9  | -0.27 | 0.58 |
| 0   | -13 | 9   | 0.08  | 0.49 |
| 0   | 13  | 9   | 0.31  | 0.45 |
| 0   | 13  | -9  | -0.44 | 0.40 |
| -1  | -13 | -9  | 0.46  | 0.58 |
| 1   | 13  | 9   | 0.84  | 0.55 |
| -6  | -14 | 9   | -0.21 | 0.75 |
| -5  | -14 | 9   | 0.06  | 0.50 |
| -4  | -14 | 9   | 0.60  | 0.53 |
| 4   | 14  | -9  | 0.02  | 0.54 |
| 2   | -14 | -9  | -0.27 | 0.55 |
| 1   | -14 | -9  | -0.02 | 0.57 |
| 14  | 0   | -10 | 0.36  | 0.53 |
| 14  | 0   | -10 | -0.59 | 0.44 |
| 13  | 0   | -10 | -0.57 | 0.43 |
| -13 | 0   | 10  | 0.25  | 0.47 |
| 13  | 0   | -10 | -0.18 | 0.49 |
| 12  | 0   | -10 | -0.14 | 0.46 |
| -12 | 0   | 10  | -0.34 | 0.42 |
| 12  | 0   | -10 | 0.33  | 0.39 |
| 11  | 0   | -10 | 0.35  | 0.38 |
| -11 | 0   | 10  | -0.24 | 0.33 |
| 11  | 0   | -10 | -0.10 | 0.43 |
| -10 | 0   | 10  | 5.55  | 0.60 |
| 10  | 0   | -10 | 6.18  | 0.64 |
| -9  | 0   | 10  | 1.29  | 0.37 |
| -9  | 0   | 10  | 2.22  | 0.47 |
| 9   | 0   | -10 | 2.77  | 0.52 |
| -8  | 0   | 10  | 0.65  | 0.36 |
| -8  | 0   | 10  | 1.64  | 0.37 |
| 8   | 0   | -10 | 0.92  | 0.43 |
| 7   | 0   | -10 | 4.69  | 0.57 |
| -7  | 0   | 10  | 3.55  | 0.43 |
| -7  | 0   | 10  | 4.08  | 0.44 |
| 6   | 0   | -10 | 17.41 | 0.87 |
| -6  | 0   | 10  | 16.98 | 0.72 |

|    |   |     |       |      |
|----|---|-----|-------|------|
| -6 | 0 | 10  | 19.21 | 0.80 |
| -5 | 0 | 10  | 6.58  | 0.76 |
| -5 | 0 | 10  | 7.56  | 0.56 |
| 5  | 0 | -10 | 9.70  | 0.72 |
| -5 | 0 | 10  | 7.79  | 0.55 |
| 4  | 0 | -10 | 9.12  | 0.47 |
| 4  | 0 | -10 | 9.16  | 0.70 |
| 4  | 0 | -10 | 9.77  | 0.67 |
| -4 | 0 | 10  | 9.09  | 0.54 |
| -4 | 0 | 10  | 10.26 | 0.54 |
| -3 | 0 | 10  | 1.01  | 0.32 |
| -3 | 0 | 10  | 0.76  | 0.33 |
| -3 | 0 | 10  | 1.52  | 0.34 |
| 3  | 0 | -10 | 0.88  | 0.38 |
| 3  | 0 | -10 | 1.24  | 0.27 |
| 2  | 0 | -10 | 0.46  | 0.26 |
| -2 | 0 | 10  | 0.44  | 0.27 |
| -2 | 0 | 10  | 0.45  | 0.35 |
| -2 | 0 | 10  | 1.34  | 0.32 |
| -2 | 0 | 10  | 0.98  | 0.40 |
| -1 | 0 | 10  | 93.65 | 2.23 |
| 1  | 0 | -10 | 90.86 | 2.13 |
| -1 | 0 | 10  | 93.37 | 2.31 |
| 1  | 0 | -10 | 90.34 | 2.23 |
| 0  | 0 | 10  | 26.84 | 0.80 |
| 0  | 0 | -10 | 27.39 | 0.87 |
| 0  | 0 | 10  | 25.90 | 1.04 |
| 0  | 0 | 10  | 26.58 | 1.00 |
| 0  | 0 | -10 | 27.09 | 0.97 |
| 1  | 0 | 10  | 1.57  | 0.46 |
| -1 | 0 | -10 | 2.18  | 0.39 |
| 1  | 0 | 10  | 2.66  | 0.49 |
| -1 | 0 | -10 | 1.43  | 0.29 |
| 2  | 0 | 10  | 23.76 | 1.05 |
| -2 | 0 | -10 | 26.47 | 0.94 |
| 2  | 0 | 10  | 25.78 | 1.07 |
| -2 | 0 | -10 | 26.31 | 1.02 |
| 3  | 0 | 10  | 2.86  | 0.58 |
| -3 | 0 | -10 | 3.60  | 0.47 |
| 3  | 0 | 10  | 4.44  | 0.58 |
| 4  | 0 | 10  | 0.67  | 0.39 |
| 4  | 0 | 10  | 0.49  | 0.46 |
| -4 | 0 | -10 | 0.46  | 0.37 |
| -5 | 0 | -10 | 0.02  | 0.34 |
| 5  | 0 | 10  | 0.20  | 0.44 |
| -6 | 0 | -10 | 0.84  | 0.47 |

|     |    |     |       |      |
|-----|----|-----|-------|------|
| 6   | 0  | 10  | 0.67  | 0.52 |
| 7   | 0  | 10  | 0.23  | 0.50 |
| -7  | 0  | -10 | -0.05 | 0.45 |
| 14  | -1 | -10 | 0.04  | 0.49 |
| 14  | -1 | -10 | 0.97  | 0.45 |
| -14 | 1  | 10  | -0.28 | 0.76 |
| 14  | 1  | -10 | 0.56  | 0.45 |
| 14  | 1  | -10 | 0.86  | 0.52 |
| 13  | -1 | -10 | 0.36  | 0.46 |
| -13 | -1 | 10  | 0.11  | 0.49 |
| 13  | -1 | -10 | -0.02 | 0.49 |
| 13  | 1  | -10 | -0.19 | 0.47 |
| -13 | 1  | 10  | 0.01  | 0.47 |
| 13  | 1  | -10 | 0.09  | 0.45 |
| -12 | -1 | 10  | 0.11  | 0.46 |
| 12  | -1 | -10 | -0.23 | 0.44 |
| 12  | -1 | -10 | -0.21 | 0.40 |
| 12  | 1  | -10 | -0.19 | 0.40 |
| -12 | 1  | 10  | 0.31  | 0.40 |
| 12  | 1  | -10 | 0.42  | 0.48 |
| 11  | -1 | -10 | 2.03  | 0.55 |
| -11 | -1 | 10  | 1.54  | 0.50 |
| 11  | 1  | -10 | 2.19  | 0.52 |
| 11  | 1  | -10 | 3.14  | 0.53 |
| -11 | 1  | 10  | 2.56  | 0.51 |
| 10  | -1 | -10 | 3.07  | 0.55 |
| -10 | -1 | 10  | 1.50  | 0.42 |
| 10  | 1  | -10 | 2.30  | 0.42 |
| -10 | 1  | 10  | 1.95  | 0.41 |
| 10  | 1  | -10 | 2.53  | 0.51 |
| -10 | 1  | 10  | 2.14  | 0.47 |
| -9  | -1 | 10  | 1.07  | 0.42 |
| 9   | -1 | -10 | 0.88  | 0.45 |
| 9   | 1  | -10 | 1.61  | 0.45 |
| -9  | 1  | 10  | 0.63  | 0.34 |
| 9   | 1  | -10 | 0.64  | 0.33 |
| -9  | 1  | 10  | 0.86  | 0.37 |
| -8  | -1 | 10  | 10.51 | 0.67 |
| -8  | -1 | 10  | 11.14 | 0.63 |
| 8   | -1 | -10 | 10.33 | 0.77 |
| 8   | 1  | -10 | 11.18 | 0.76 |
| -8  | 1  | 10  | 11.08 | 0.69 |
| -8  | 1  | 10  | 10.82 | 0.62 |
| 7   | -1 | -10 | 0.26  | 0.40 |
| -7  | -1 | 10  | -0.49 | 0.30 |
| -7  | -1 | 10  | 0.03  | 0.27 |

|    |    |     |       |      |
|----|----|-----|-------|------|
| 7  | 1  | -10 | 0.29  | 0.35 |
| -7 | 1  | 10  | -0.16 | 0.26 |
| -7 | 1  | 10  | 0.22  | 0.30 |
| -6 | -1 | 10  | 18.44 | 0.79 |
| -6 | -1 | 10  | 18.55 | 0.83 |
| 6  | -1 | -10 | 18.88 | 0.92 |
| -6 | -1 | 10  | 19.95 | 0.99 |
| -6 | 1  | 10  | 19.46 | 0.79 |
| -6 | 1  | 10  | 18.11 | 0.75 |
| 6  | 1  | -10 | 19.50 | 0.88 |
| 5  | -1 | -10 | 33.29 | 1.20 |
| -5 | -1 | 10  | 31.08 | 1.05 |
| -5 | -1 | 10  | 31.85 | 1.00 |
| -5 | -1 | 10  | 31.17 | 1.21 |
| 5  | 1  | -10 | 31.67 | 1.27 |
| -5 | 1  | 10  | 30.53 | 0.99 |
| 5  | 1  | -10 | 33.08 | 1.13 |
| 4  | -1 | -10 | 10.32 | 0.49 |
| 4  | -1 | -10 | 10.51 | 0.70 |
| -4 | -1 | 10  | 11.50 | 0.64 |
| -4 | -1 | 10  | 10.16 | 0.53 |
| -4 | -1 | 10  | 10.52 | 0.55 |
| 4  | 1  | -10 | 9.88  | 0.76 |
| 4  | 1  | -10 | 11.15 | 0.66 |
| -4 | 1  | 10  | 11.67 | 0.60 |
| -4 | 1  | 10  | 10.28 | 0.56 |
| 4  | 1  | -10 | 11.24 | 0.72 |
| -3 | -1 | 10  | 1.25  | 0.35 |
| 3  | -1 | -10 | 1.14  | 0.27 |
| -3 | -1 | 10  | 1.27  | 0.29 |
| -3 | -1 | 10  | 0.88  | 0.31 |
| -3 | 1  | 10  | 1.04  | 0.29 |
| 3  | 1  | -10 | 0.61  | 0.38 |
| -3 | 1  | 10  | 1.23  | 0.30 |
| 3  | 1  | -10 | 1.06  | 0.37 |
| -2 | -1 | 10  | 32.59 | 1.09 |
| -2 | -1 | 10  | 30.34 | 0.93 |
| -2 | -1 | 10  | 31.52 | 1.03 |
| 2  | -1 | -10 | 30.67 | 0.98 |
| -2 | 1  | 10  | 32.87 | 0.96 |
| 2  | 1  | -10 | 32.64 | 1.21 |
| -2 | 1  | 10  | 32.17 | 1.13 |
| -2 | 1  | 10  | 30.56 | 0.93 |
| -1 | -1 | 10  | 5.36  | 0.54 |
| 1  | -1 | -10 | 5.42  | 0.39 |
| -1 | -1 | 10  | 4.91  | 0.40 |

|    |    |     |       |      |
|----|----|-----|-------|------|
| -1 | -1 | 10  | 4.58  | 0.48 |
| 1  | -1 | -10 | 4.64  | 0.45 |
| -1 | 1  | 10  | 4.35  | 0.55 |
| -1 | 1  | 10  | 4.94  | 0.56 |
| -1 | 1  | 10  | 5.33  | 0.42 |
| 1  | 1  | -10 | 5.65  | 0.46 |
| 0  | -1 | 10  | 15.09 | 0.58 |
| 0  | -1 | 10  | 16.03 | 0.77 |
| 0  | -1 | -10 | 14.98 | 0.72 |
| 0  | -1 | -10 | 14.58 | 0.59 |
| 0  | -1 | 10  | 17.14 | 0.83 |
| 0  | 1  | 10  | 15.91 | 0.83 |
| 0  | 1  | 10  | 15.79 | 0.82 |
| 0  | 1  | -10 | 13.60 | 0.63 |
| 0  | 1  | 10  | 14.99 | 0.59 |
| 1  | -1 | 10  | 3.75  | 0.53 |
| -1 | -1 | -10 | 3.81  | 0.44 |
| 1  | 1  | 10  | 3.40  | 0.52 |
| 1  | 1  | 10  | 3.54  | 0.33 |
| -1 | 1  | -10 | 2.71  | 0.37 |
| 1  | 1  | 10  | 2.55  | 0.54 |
| 2  | -1 | 10  | 1.36  | 0.42 |
| -2 | -1 | -10 | -0.09 | 0.27 |
| 2  | -1 | 10  | 0.31  | 0.41 |
| -2 | 1  | -10 | 0.74  | 0.35 |
| 2  | 1  | 10  | 0.29  | 0.44 |
| -2 | 1  | -10 | 0.57  | 0.27 |
| 3  | -1 | 10  | 0.56  | 0.41 |
| 3  | -1 | 10  | 0.72  | 0.42 |
| -3 | -1 | -10 | 0.54  | 0.35 |
| -3 | 1  | -10 | 0.85  | 0.35 |
| 3  | 1  | 10  | 0.43  | 0.42 |
| -3 | 1  | -10 | 0.42  | 0.29 |
| 4  | -1 | 10  | 0.07  | 0.49 |
| 4  | -1 | 10  | 0.56  | 0.39 |
| -4 | -1 | -10 | 0.51  | 0.38 |
| -4 | 1  | -10 | 0.55  | 0.32 |
| 4  | 1  | 10  | 0.47  | 0.43 |
| -5 | -1 | -10 | 0.09  | 0.38 |
| 5  | -1 | 10  | 0.27  | 0.45 |
| 5  | -1 | 10  | 0.20  | 0.51 |
| 5  | 1  | 10  | 0.33  | 0.46 |
| -5 | 1  | -10 | 0.29  | 0.37 |
| 6  | -1 | 10  | 0.58  | 0.59 |
| -6 | -1 | -10 | -0.06 | 0.39 |
| 6  | -1 | 10  | 0.30  | 0.47 |

|     |    |     |       |      |
|-----|----|-----|-------|------|
| 6   | 1  | 10  | 0.48  | 0.48 |
| -6  | 1  | -10 | 0.27  | 0.38 |
| -7  | -1 | -10 | -0.28 | 0.43 |
| 7   | -1 | 10  | 0.14  | 0.49 |
| -7  | 1  | -10 | 0.18  | 0.44 |
| 7   | 1  | 10  | 0.50  | 0.52 |
| 14  | -2 | -10 | 0.10  | 0.55 |
| 14  | 2  | -10 | 0.10  | 0.50 |
| 13  | -2 | -10 | -0.05 | 0.50 |
| -13 | -2 | 10  | -0.21 | 0.41 |
| 13  | -2 | -10 | 0.10  | 0.44 |
| -13 | 2  | 10  | -0.34 | 0.38 |
| 13  | 2  | -10 | 0.05  | 0.46 |
| 12  | -2 | -10 | -0.35 | 0.50 |
| -12 | -2 | 10  | 0.29  | 0.47 |
| 12  | 2  | -10 | -0.06 | 0.47 |
| 12  | 2  | -10 | 0.39  | 0.39 |
| -12 | 2  | 10  | 0.56  | 0.46 |
| 11  | -2 | -10 | -0.80 | 0.41 |
| -11 | -2 | 10  | -0.53 | 0.40 |
| 11  | 2  | -10 | -0.25 | 0.33 |
| -11 | 2  | 10  | -0.07 | 0.34 |
| -11 | 2  | 10  | 0.12  | 0.39 |
| 11  | 2  | -10 | 0.15  | 0.41 |
| 10  | -2 | -10 | 2.90  | 0.57 |
| -10 | -2 | 10  | 2.66  | 0.47 |
| 10  | 2  | -10 | 2.84  | 0.47 |
| -10 | 2  | 10  | 2.12  | 0.46 |
| 10  | 2  | -10 | 2.49  | 0.47 |
| -10 | 2  | 10  | 2.86  | 0.46 |
| 9   | -2 | -10 | 7.42  | 0.70 |
| -9  | -2 | 10  | 7.28  | 0.64 |
| 9   | 2  | -10 | 8.17  | 0.65 |
| -9  | 2  | 10  | 7.44  | 0.62 |
| -9  | 2  | 10  | 7.41  | 0.62 |
| 9   | 2  | -10 | 7.15  | 0.61 |
| -8  | -2 | 10  | 1.08  | 0.42 |
| 8   | -2 | -10 | 0.11  | 0.41 |
| -8  | 2  | 10  | 1.13  | 0.36 |
| 8   | 2  | -10 | 0.82  | 0.33 |
| -8  | 2  | 10  | 1.15  | 0.35 |
| 8   | 2  | -10 | 0.93  | 0.40 |
| -7  | -2 | 10  | 7.10  | 0.67 |
| -7  | -2 | 10  | 7.35  | 0.63 |
| 7   | -2 | -10 | 6.04  | 0.62 |
| 7   | 2  | -10 | 6.35  | 0.54 |



|    |    |     |       |      |
|----|----|-----|-------|------|
| 7  | 2  | -10 | 5.94  | 0.56 |
| -7 | 2  | 10  | 6.92  | 0.54 |
| -7 | 2  | 10  | 6.61  | 0.52 |
| 6  | -2 | -10 | 0.87  | 0.43 |
| -6 | -2 | 10  | 0.29  | 0.33 |
| -6 | -2 | 10  | 0.56  | 0.29 |
| -6 | -2 | 10  | 1.41  | 0.40 |
| 6  | 2  | -10 | 0.31  | 0.42 |
| -6 | 2  | 10  | 1.26  | 0.32 |
| 6  | 2  | -10 | 0.51  | 0.37 |
| -5 | -2 | 10  | 7.25  | 0.60 |
| -5 | -2 | 10  | 7.06  | 0.54 |
| -5 | -2 | 10  | 7.67  | 0.43 |
| 5  | -2 | -10 | 6.40  | 0.63 |
| 5  | 2  | -10 | 7.44  | 0.60 |
| -5 | 2  | 10  | 7.04  | 0.52 |
| 5  | 2  | -10 | 7.31  | 0.67 |
| -5 | 2  | 10  | 7.99  | 0.52 |
| 4  | -2 | -10 | 5.63  | 0.39 |
| 4  | -2 | -10 | 6.13  | 0.60 |
| -4 | -2 | 10  | 5.76  | 0.43 |
| -4 | -2 | 10  | 6.03  | 0.55 |
| -4 | -2 | 10  | 5.55  | 0.45 |
| 4  | 2  | -10 | 6.34  | 0.62 |
| -4 | 2  | 10  | 5.41  | 0.45 |
| 4  | 2  | -10 | 5.49  | 0.54 |
| 4  | 2  | -10 | 5.36  | 0.52 |
| -4 | 2  | 10  | 5.41  | 0.42 |
| -3 | -2 | 10  | 50.57 | 1.29 |
| 3  | -2 | -10 | 50.93 | 1.32 |
| -3 | -2 | 10  | 50.38 | 1.43 |
| -3 | 2  | 10  | 50.08 | 1.31 |
| -3 | 2  | 10  | 49.38 | 1.28 |
| 3  | 2  | -10 | 50.43 | 1.64 |
| 3  | 2  | -10 | 52.32 | 1.59 |
| 2  | -2 | -10 | 8.83  | 0.52 |
| -2 | -2 | 10  | 8.92  | 0.58 |
| -2 | -2 | 10  | 8.08  | 0.49 |
| -2 | -2 | 10  | 10.21 | 0.62 |
| -2 | 2  | 10  | 9.67  | 0.51 |
| 2  | 2  | -10 | 9.90  | 0.75 |
| -2 | 2  | 10  | 9.35  | 0.69 |
| 2  | 2  | -10 | 7.53  | 0.63 |
| -1 | -2 | 10  | 55.40 | 1.35 |
| 1  | -2 | -10 | 56.54 | 1.53 |
| -1 | -2 | 10  | 55.70 | 1.54 |

|    |    |     |       |      |
|----|----|-----|-------|------|
| -1 | -2 | 10  | 58.19 | 1.58 |
| 1  | 2  | -10 | 57.02 | 1.53 |
| 1  | 2  | -10 | 54.66 | 1.71 |
| -1 | 2  | 10  | 57.75 | 1.65 |
| -1 | 2  | 10  | 53.56 | 1.39 |
| 0  | -2 | 10  | 6.92  | 0.57 |
| 0  | -2 | -10 | 7.55  | 0.58 |
| 0  | -2 | 10  | 7.76  | 0.42 |
| 0  | -2 | 10  | 8.46  | 0.63 |
| 0  | 2  | -10 | 5.89  | 0.48 |
| 0  | 2  | 10  | 8.94  | 0.68 |
| 1  | -2 | 10  | 10.52 | 0.70 |
| -1 | -2 | -10 | 7.88  | 0.64 |
| 1  | -2 | 10  | 9.62  | 0.68 |
| -1 | 2  | -10 | 8.81  | 0.56 |
| 1  | 2  | 10  | 10.73 | 0.79 |
| 1  | 2  | 10  | 9.30  | 0.49 |
| -2 | -2 | -10 | 9.49  | 0.67 |
| 2  | -2 | 10  | 7.54  | 0.64 |
| 2  | -2 | 10  | 9.84  | 0.73 |
| 2  | 2  | 10  | 8.36  | 0.74 |
| -2 | 2  | -10 | 8.77  | 0.57 |
| 3  | -2 | 10  | -0.05 | 0.38 |
| -3 | -2 | -10 | -0.18 | 0.33 |
| 3  | -2 | 10  | 0.50  | 0.40 |
| -3 | 2  | -10 | 0.29  | 0.30 |
| 3  | 2  | 10  | 0.09  | 0.45 |
| -4 | -2 | -10 | 0.94  | 0.36 |
| 4  | -2 | 10  | 1.24  | 0.46 |
| 4  | -2 | 10  | 0.40  | 0.48 |
| -4 | 2  | -10 | 0.77  | 0.36 |
| -4 | 2  | -10 | 0.56  | 0.36 |
| 4  | 2  | 10  | 1.54  | 0.50 |
| 5  | -2 | 10  | -0.20 | 0.41 |
| -5 | -2 | -10 | 0.50  | 0.36 |
| 5  | -2 | 10  | 0.15  | 0.45 |
| -5 | 2  | -10 | 0.83  | 0.37 |
| 5  | 2  | 10  | -0.03 | 0.47 |
| -5 | 2  | -10 | 0.50  | 0.38 |
| 6  | -2 | 10  | 0.35  | 0.51 |
| 6  | -2 | 10  | 0.61  | 0.48 |
| -6 | -2 | -10 | -0.39 | 0.39 |
| -6 | 2  | -10 | 0.06  | 0.41 |
| 6  | 2  | 10  | 0.16  | 0.50 |
| -7 | -2 | -10 | -0.06 | 0.43 |
| 7  | -2 | 10  | -0.30 | 0.53 |

|     |    |     |       |      |
|-----|----|-----|-------|------|
| 7   | -2 | 10  | -0.30 | 0.45 |
| -7  | 2  | -10 | -0.13 | 0.44 |
| 7   | 2  | 10  | 0.66  | 0.54 |
| 14  | 3  | -10 | -0.19 | 0.50 |
| 13  | -3 | -10 | 0.84  | 0.56 |
| -13 | -3 | 10  | 1.54  | 0.58 |
| -13 | 3  | 10  | 0.55  | 0.48 |
| 13  | 3  | -10 | 0.92  | 0.50 |
| 12  | -3 | -10 | 0.47  | 0.52 |
| -12 | -3 | 10  | 0.02  | 0.41 |
| -12 | 3  | 10  | 0.29  | 0.38 |
| 12  | 3  | -10 | 0.26  | 0.45 |
| -12 | 3  | 10  | 0.26  | 0.44 |
| -11 | -3 | 10  | 0.90  | 0.48 |
| 11  | -3 | -10 | 1.54  | 0.55 |
| -11 | 3  | 10  | 1.60  | 0.43 |
| -11 | 3  | 10  | 0.97  | 0.42 |
| 11  | 3  | -10 | 1.63  | 0.43 |
| 10  | -3 | -10 | 1.39  | 0.52 |
| -10 | -3 | 10  | 1.02  | 0.46 |
| 10  | 3  | -10 | 0.68  | 0.38 |
| -10 | 3  | 10  | 1.03  | 0.41 |
| -10 | 3  | 10  | 1.56  | 0.44 |
| -9  | -3 | 10  | 0.57  | 0.42 |
| 9   | -3 | -10 | 0.44  | 0.45 |
| -9  | 3  | 10  | 0.79  | 0.37 |
| 9   | 3  | -10 | 0.63  | 0.34 |
| 9   | 3  | -10 | 0.43  | 0.40 |
| -9  | 3  | 10  | 0.80  | 0.38 |
| 8   | -3 | -10 | 6.20  | 0.70 |
| -8  | -3 | 10  | 4.30  | 0.52 |
| 8   | 3  | -10 | 3.78  | 0.50 |
| 8   | 3  | -10 | 4.58  | 0.51 |
| -8  | 3  | 10  | 4.03  | 0.47 |
| -8  | 3  | 10  | 4.85  | 0.48 |
| -7  | -3 | 10  | 2.05  | 0.46 |
| 7   | -3 | -10 | 2.26  | 0.49 |
| -7  | 3  | 10  | 1.36  | 0.38 |
| 7   | 3  | -10 | 1.68  | 0.39 |
| 7   | 3  | -10 | 2.36  | 0.43 |
| 6   | -3 | -10 | 0.32  | 0.40 |
| -6  | -3 | 10  | 0.39  | 0.37 |
| -6  | 3  | 10  | 0.40  | 0.28 |
| -6  | 3  | 10  | 0.26  | 0.28 |
| 6   | 3  | -10 | 0.33  | 0.29 |
| 6   | 3  | -10 | -0.24 | 0.56 |

|    |    |     |       |      |
|----|----|-----|-------|------|
| 6  | 3  | -10 | -0.24 | 0.32 |
| -5 | -3 | 10  | 0.97  | 0.26 |
| -5 | -3 | 10  | 0.55  | 0.34 |
| 5  | -3 | -10 | 1.23  | 0.46 |
| 5  | 3  | -10 | 0.53  | 0.34 |
| 5  | 3  | -10 | 0.99  | 0.32 |
| -5 | 3  | 10  | 1.09  | 0.30 |
| 5  | 3  | -10 | 0.70  | 0.32 |
| -5 | 3  | 10  | 0.81  | 0.28 |
| 5  | 3  | -10 | 0.87  | 0.39 |
| 4  | -3 | -10 | 30.19 | 1.17 |
| 4  | -3 | -10 | 30.41 | 0.90 |
| -4 | -3 | 10  | 30.39 | 0.93 |
| -4 | -3 | 10  | 29.77 | 1.05 |
| 4  | 3  | -10 | 31.46 | 0.98 |
| -4 | 3  | 10  | 30.10 | 0.96 |
| -4 | 3  | 10  | 30.57 | 0.91 |
| 4  | 3  | -10 | 32.28 | 1.03 |
| 4  | 3  | -10 | 29.14 | 1.09 |
| 4  | 3  | -10 | 30.76 | 1.19 |
| -3 | -3 | 10  | 11.23 | 0.69 |
| 3  | -3 | -10 | 12.48 | 0.74 |
| 3  | -3 | -10 | 11.55 | 0.54 |
| -3 | 3  | 10  | 12.78 | 0.60 |
| 3  | 3  | -10 | 12.78 | 0.62 |
| 3  | 3  | -10 | 10.55 | 0.71 |
| 3  | 3  | -10 | 10.65 | 0.76 |
| -2 | -3 | 10  | 32.09 | 1.08 |
| -2 | -3 | 10  | 29.91 | 1.02 |
| -2 | -3 | 10  | 30.86 | 1.01 |
| 2  | -3 | -10 | 31.72 | 0.99 |
| -2 | 3  | 10  | 31.27 | 0.95 |
| 2  | 3  | -10 | 30.03 | 1.18 |
| 2  | 3  | -10 | 31.06 | 1.13 |
| 2  | 3  | -10 | 29.71 | 0.91 |
| -2 | 3  | 10  | 32.40 | 1.17 |
| 1  | -3 | -10 | 1.80  | 0.33 |
| -1 | -3 | 10  | 1.54  | 0.38 |
| 1  | 3  | -10 | 1.17  | 0.37 |
| -1 | 3  | 10  | 1.61  | 0.31 |
| 1  | 3  | -10 | 1.94  | 0.38 |
| 1  | 3  | -10 | 1.08  | 0.39 |
| -1 | 3  | 10  | 1.27  | 0.41 |
| 1  | 3  | -10 | 2.01  | 0.30 |
| 0  | -3 | 10  | 2.02  | 0.38 |
| 0  | -3 | -10 | 2.19  | 0.36 |

|     |    |     |       |      |
|-----|----|-----|-------|------|
| 0   | 3  | -10 | 2.40  | 0.37 |
| 0   | 3  | 10  | 1.47  | 0.42 |
| 0   | 3  | -10 | 1.48  | 0.27 |
| 0   | 3  | 10  | 2.28  | 0.33 |
| -1  | -3 | -10 | 1.81  | 0.36 |
| 1   | -3 | 10  | 1.34  | 0.42 |
| 1   | -3 | 10  | 1.97  | 0.40 |
| 1   | 3  | 10  | 3.00  | 0.55 |
| -1  | 3  | -10 | 1.87  | 0.36 |
| 1   | 3  | 10  | 2.03  | 0.32 |
| 2   | -3 | 10  | 2.17  | 0.43 |
| -2  | -3 | -10 | 2.13  | 0.39 |
| 2   | -3 | 10  | 3.46  | 0.50 |
| -2  | 3  | -10 | 2.02  | 0.39 |
| 2   | 3  | 10  | 2.55  | 0.56 |
| 3   | -3 | 10  | 0.18  | 0.39 |
| -3  | -3 | -10 | -0.54 | 0.27 |
| 3   | -3 | 10  | 0.64  | 0.41 |
| 3   | 3  | 10  | 0.44  | 0.41 |
| -3  | 3  | -10 | 0.36  | 0.31 |
| -4  | -3 | -10 | 1.89  | 0.42 |
| 4   | -3 | 10  | 0.82  | 0.41 |
| 4   | -3 | 10  | 2.17  | 0.49 |
| 4   | 3  | 10  | 1.77  | 0.51 |
| -4  | 3  | -10 | 1.80  | 0.40 |
| -5  | -3 | -10 | 0.23  | 0.39 |
| 5   | -3 | 10  | 0.47  | 0.44 |
| -5  | 3  | -10 | -0.07 | 0.35 |
| 5   | 3  | 10  | -0.22 | 0.45 |
| -6  | -3 | -10 | 0.54  | 0.45 |
| 6   | -3 | 10  | 0.48  | 0.48 |
| 6   | -3 | 10  | 0.27  | 0.57 |
| -6  | 3  | -10 | 0.43  | 0.41 |
| -6  | 3  | -10 | 0.09  | 0.40 |
| 6   | 3  | 10  | 0.15  | 0.50 |
| -7  | -3 | -10 | 0.39  | 0.44 |
| 7   | -3 | 10  | 0.69  | 0.65 |
| 7   | -3 | 10  | 0.14  | 0.49 |
| -7  | 3  | -10 | 0.73  | 0.44 |
| 7   | 3  | 10  | 0.17  | 0.51 |
| 13  | -4 | -10 | -0.42 | 0.52 |
| -13 | -4 | 10  | 0.16  | 0.51 |
| -13 | 4  | 10  | 0.22  | 0.44 |
| 13  | 4  | -10 | 0.42  | 0.45 |
| -13 | 4  | 10  | 0.40  | 0.44 |
| 12  | -4 | -10 | -0.43 | 0.49 |

-12 -4 10 0.60 0.50  
-12 4 10 0.48 0.41  
12 4 -10 0.20 0.47  
-12 4 10 -0.25 0.38  
-11 -4 10 0.30 0.41  
11 -4 -10 -0.06 0.46  
-11 4 10 0.18 0.37  
11 4 -10 -0.30 0.36  
-11 4 10 0.54 0.38  
-10 -4 10 0.52 0.40  
10 -4 -10 0.31 0.47  
10 4 -10 0.23 0.36  
-10 4 10 0.39 0.41  
-10 4 10 1.03 0.38  
9 -4 -10 2.74 0.58  
-9 -4 10 3.12 0.50  
-9 4 10 3.30 0.47  
9 4 -10 3.30 0.47  
-9 4 10 2.77 0.45  
-8 -4 10 2.13 0.48  
8 -4 -10 2.97 0.54  
8 4 -10 2.05 0.40  
-8 4 10 2.20 0.41  
-7 -4 10 9.89 0.69  
7 -4 -10 10.16 0.77  
-7 4 10 11.18 0.63  
-7 4 10 11.02 0.64  
7 4 -10 9.18 0.61  
-6 -4 10 3.66 0.52  
6 -4 -10 3.95 0.58  
6 4 -10 3.74 0.47  
-6 4 10 3.82 0.46  
-6 4 10 5.10 0.43  
5 -4 -10 4.52 0.57  
-5 -4 10 4.53 0.54  
-5 -4 10 4.10 0.39  
5 4 -10 5.19 0.48  
-5 4 10 5.20 0.46  
4 -4 -10 1.98 0.47  
-4 -4 10 1.84 0.33  
-4 -4 10 1.94 0.40  
4 -4 -10 2.37 0.32  
4 4 -10 1.46 0.35  
4 4 -10 1.34 0.32  
-4 4 10 1.67 0.36  
-3 -4 10 19.17 0.77

|    |    |     |       |      |
|----|----|-----|-------|------|
| 3  | -4 | -10 | 18.05 | 0.73 |
| 3  | -4 | -10 | 19.08 | 0.95 |
| -3 | -4 | 10  | 19.67 | 0.88 |
| -3 | 4  | 10  | 20.41 | 0.76 |
| 3  | 4  | -10 | 18.83 | 0.76 |
| 3  | 4  | -10 | 21.11 | 0.80 |
| -2 | -4 | 10  | 3.51  | 0.46 |
| -2 | -4 | 10  | 3.42  | 0.41 |
| 2  | -4 | -10 | 2.87  | 0.37 |
| -2 | -4 | 10  | 3.59  | 0.44 |
| -2 | 4  | 10  | 3.52  | 0.51 |
| 2  | 4  | -10 | 3.63  | 0.38 |
| -2 | 4  | 10  | 3.68  | 0.39 |
| 2  | 4  | -10 | 3.15  | 0.61 |
| 1  | -4 | -10 | -0.10 | 0.26 |
| -1 | -4 | 10  | 0.12  | 0.31 |
| -1 | -4 | 10  | 0.18  | 0.32 |
| 1  | 4  | -10 | 0.25  | 0.30 |
| 1  | 4  | -10 | -0.08 | 0.32 |
| 1  | 4  | -10 | 0.23  | 0.22 |
| -1 | 4  | 10  | 0.11  | 0.33 |
| 1  | 4  | -10 | -0.16 | 0.36 |
| -1 | 4  | 10  | 0.40  | 0.25 |
| 0  | -4 | -10 | 5.49  | 0.50 |
| 0  | -4 | 10  | 5.09  | 0.54 |
| 0  | -4 | 10  | 6.45  | 0.55 |
| 0  | 4  | 10  | 5.77  | 0.46 |
| 0  | 4  | -10 | 5.70  | 0.59 |
| 0  | 4  | 10  | 5.41  | 0.60 |
| 0  | 4  | -10 | 3.60  | 0.43 |
| 1  | -4 | 10  | 5.00  | 0.56 |
| -1 | -4 | -10 | 4.87  | 0.52 |
| 1  | 4  | 10  | 3.89  | 0.52 |
| -1 | 4  | -10 | 5.51  | 0.55 |
| -2 | -4 | -10 | 0.79  | 0.37 |
| 2  | -4 | 10  | 1.97  | 0.43 |
| 2  | -4 | 10  | 1.36  | 0.39 |
| -2 | 4  | -10 | 1.01  | 0.33 |
| 2  | 4  | 10  | 1.75  | 0.51 |
| 2  | 4  | 10  | 1.55  | 0.34 |
| 3  | -4 | 10  | 0.29  | 0.38 |
| -3 | -4 | -10 | 0.36  | 0.32 |
| 3  | -4 | 10  | 0.18  | 0.34 |
| -3 | 4  | -10 | 0.51  | 0.34 |
| 3  | 4  | 10  | 0.38  | 0.44 |
| 4  | -4 | 10  | 0.20  | 0.37 |

|     |    |     |       |      |
|-----|----|-----|-------|------|
| 4   | -4 | 10  | 0.06  | 0.41 |
| -4  | -4 | -10 | -0.16 | 0.34 |
| 4   | 4  | 10  | -0.28 | 0.47 |
| -4  | 4  | -10 | 0.00  | 0.34 |
| 5   | -4 | 10  | 0.33  | 0.43 |
| -5  | -4 | -10 | 0.62  | 0.42 |
| 5   | -4 | 10  | 0.18  | 0.40 |
| 5   | 4  | 10  | 0.28  | 0.53 |
| -5  | 4  | -10 | 0.17  | 0.39 |
| 6   | -4 | 10  | 0.18  | 0.48 |
| -6  | -4 | -10 | -0.33 | 0.40 |
| -6  | 4  | -10 | -0.28 | 0.38 |
| 6   | 4  | 10  | 0.78  | 0.54 |
| 7   | -4 | 10  | 0.87  | 0.66 |
| 7   | -4 | 10  | 0.39  | 0.50 |
| -7  | -4 | -10 | 0.07  | 0.51 |
| 7   | 4  | 10  | 0.30  | 0.60 |
| -7  | 4  | -10 | 0.22  | 0.45 |
| -7  | 4  | -10 | 1.27  | 0.49 |
| -13 | -5 | 10  | -0.21 | 0.50 |
| 13  | -5 | -10 | 0.19  | 0.55 |
| -13 | 5  | 10  | -0.02 | 0.45 |
| -13 | 5  | 10  | 0.05  | 0.48 |
| 13  | 5  | -10 | 0.04  | 0.44 |
| -12 | -5 | 10  | 1.99  | 0.59 |
| 12  | -5 | -10 | 2.09  | 0.61 |
| -12 | 5  | 10  | 2.00  | 0.51 |
| 12  | 5  | -10 | 1.18  | 0.48 |
| -12 | 5  | 10  | 1.12  | 0.44 |
| -11 | -5 | 10  | 0.45  | 0.49 |
| 11  | -5 | -10 | -0.30 | 0.43 |
| -11 | 5  | 10  | 0.14  | 0.39 |
| -11 | 5  | 10  | -0.26 | 0.42 |
| 11  | 5  | -10 | 0.74  | 0.42 |
| 10  | -5 | -10 | -0.15 | 0.46 |
| -10 | -5 | 10  | 1.64  | 0.50 |
| -10 | 5  | 10  | 0.17  | 0.35 |
| -10 | 5  | 10  | 0.14  | 0.35 |
| 10  | 5  | -10 | 0.37  | 0.37 |
| -9  | -5 | 10  | 1.66  | 0.49 |
| 9   | -5 | -10 | 1.58  | 0.55 |
| 9   | 5  | -10 | 1.12  | 0.39 |
| -9  | 5  | 10  | 1.16  | 0.43 |
| -9  | 5  | 10  | 0.84  | 0.35 |
| 8   | -5 | -10 | 0.31  | 0.41 |
| -8  | -5 | 10  | 0.83  | 0.40 |



|    |    |     |       |      |
|----|----|-----|-------|------|
| -8 | 5  | 10  | 0.36  | 0.34 |
| -8 | 5  | 10  | 0.42  | 0.32 |
| 8  | 5  | -10 | 0.19  | 0.34 |
| 7  | -5 | -10 | 0.71  | 0.46 |
| -7 | -5 | 10  | 0.65  | 0.41 |
| 7  | 5  | -10 | 0.55  | 0.38 |
| -7 | 5  | 10  | 0.27  | 0.34 |
| 6  | -5 | -10 | 23.30 | 1.10 |
| -6 | -5 | 10  | 22.75 | 1.01 |
| 6  | 5  | -10 | 22.52 | 0.89 |
| -6 | 5  | 10  | 22.27 | 0.88 |
| 5  | -5 | -10 | 0.26  | 0.40 |
| -5 | -5 | 10  | -0.17 | 0.31 |
| -5 | -5 | 10  | 0.04  | 0.26 |
| 5  | 5  | -10 | 0.27  | 0.29 |
| -5 | 5  | 10  | 0.11  | 0.28 |
| -4 | -5 | 10  | 10.70 | 0.73 |
| 4  | -5 | -10 | 8.53  | 0.54 |
| 4  | -5 | -10 | 10.57 | 0.77 |
| -4 | 5  | 10  | 9.61  | 0.58 |
| 4  | 5  | -10 | 9.74  | 0.57 |
| 3  | -5 | -10 | 4.46  | 0.44 |
| -3 | -5 | 10  | 5.04  | 0.56 |
| 3  | -5 | -10 | 4.33  | 0.54 |
| -3 | -5 | 10  | 5.00  | 0.47 |
| -3 | 5  | 10  | 5.75  | 0.48 |
| 3  | 5  | -10 | 4.99  | 0.46 |
| -2 | -5 | 10  | -0.02 | 0.30 |
| -2 | -5 | 10  | 0.61  | 0.38 |
| 2  | -5 | -10 | -0.12 | 0.26 |
| -2 | 5  | 10  | 0.11  | 0.25 |
| -2 | 5  | 10  | 0.24  | 0.39 |
| 2  | 5  | -10 | -0.34 | 0.24 |
| 1  | -5 | -10 | 4.36  | 0.47 |
| -1 | -5 | 10  | 4.12  | 0.49 |
| 1  | 5  | -10 | 4.15  | 0.37 |
| -1 | 5  | 10  | 3.94  | 0.41 |
| -1 | 5  | 10  | 4.17  | 0.55 |
| 1  | 5  | -10 | 5.40  | 0.54 |
| 0  | -5 | 10  | 1.61  | 0.43 |
| 0  | -5 | -10 | 1.05  | 0.33 |
| 0  | 5  | 10  | 0.74  | 0.39 |
| 0  | 5  | 10  | 1.21  | 0.31 |
| 0  | 5  | -10 | 1.34  | 0.38 |
| 1  | -5 | 10  | -0.23 | 0.37 |
| -1 | -5 | -10 | -0.52 | 0.29 |

|     |    |     |       |      |
|-----|----|-----|-------|------|
| 1   | -5 | 10  | -0.31 | 0.34 |
| 1   | 5  | 10  | -0.19 | 0.23 |
| 1   | 5  | 10  | -0.19 | 0.35 |
| -1  | 5  | -10 | 0.35  | 0.33 |
| 2   | -5 | 10  | 0.35  | 0.40 |
| -2  | -5 | -10 | -0.29 | 0.32 |
| -2  | 5  | -10 | 0.36  | 0.33 |
| 2   | 5  | 10  | 0.92  | 0.45 |
| -3  | -5 | -10 | 0.21  | 0.33 |
| 3   | -5 | 10  | 0.36  | 0.38 |
| 3   | -5 | 10  | 0.18  | 0.35 |
| -3  | 5  | -10 | 0.19  | 0.35 |
| 3   | 5  | 10  | 0.69  | 0.47 |
| 4   | -5 | 10  | 0.44  | 0.44 |
| 4   | -5 | 10  | -0.39 | 0.40 |
| -4  | -5 | -10 | -0.27 | 0.38 |
| -4  | 5  | -10 | 0.20  | 0.32 |
| 4   | 5  | 10  | -0.15 | 0.47 |
| 5   | -5 | 10  | 0.52  | 0.44 |
| -5  | -5 | -10 | 1.24  | 0.44 |
| 5   | -5 | 10  | 0.66  | 0.44 |
| -5  | 5  | -10 | 2.32  | 0.52 |
| 5   | 5  | 10  | 0.67  | 0.56 |
| -6  | -5 | -10 | 0.03  | 0.40 |
| 6   | -5 | 10  | -0.21 | 0.48 |
| 6   | -5 | 10  | 0.16  | 0.48 |
| 6   | 5  | 10  | 0.25  | 0.56 |
| -6  | 5  | -10 | 0.07  | 0.43 |
| 7   | -5 | 10  | 0.70  | 0.51 |
| -7  | 5  | -10 | -0.05 | 0.45 |
| -13 | 6  | 10  | -0.52 | 0.43 |
| -12 | -6 | 10  | 0.44  | 0.48 |
| 12  | -6 | -10 | 0.58  | 0.56 |
| -12 | 6  | 10  | 0.26  | 0.46 |
| 12  | 6  | -10 | -0.62 | 0.47 |
| -12 | 6  | 10  | -0.44 | 0.41 |
| -11 | -6 | 10  | 1.14  | 0.51 |
| 11  | -6 | -10 | 0.63  | 0.55 |
| -11 | 6  | 10  | 0.21  | 0.40 |
| 11  | 6  | -10 | -0.15 | 0.41 |
| -11 | 6  | 10  | 0.54  | 0.42 |
| 10  | -6 | -10 | 0.08  | 0.49 |
| -10 | -6 | 10  | 0.31  | 0.41 |
| 10  | 6  | -10 | 0.80  | 0.46 |
| -10 | 6  | 10  | 0.30  | 0.37 |
| -10 | 6  | 10  | 0.13  | 0.37 |

|    |    |     |       |      |
|----|----|-----|-------|------|
| 9  | -6 | -10 | 2.16  | 0.57 |
| -9 | -6 | 10  | 2.41  | 0.52 |
| 9  | 6  | -10 | 2.00  | 0.44 |
| -9 | 6  | 10  | 2.64  | 0.50 |
| -8 | -6 | 10  | 2.04  | 0.50 |
| 8  | -6 | -10 | 2.46  | 0.57 |
| 8  | 6  | -10 | 3.06  | 0.45 |
| -8 | 6  | 10  | 2.28  | 0.43 |
| -7 | -6 | 10  | 3.79  | 0.52 |
| 7  | -6 | -10 | 3.27  | 0.61 |
| 7  | 6  | -10 | 2.48  | 0.44 |
| -7 | 6  | 10  | 3.68  | 0.49 |
| 6  | -6 | -10 | 0.93  | 0.48 |
| -6 | -6 | 10  | 1.53  | 0.45 |
| -6 | 6  | 10  | 0.97  | 0.35 |
| 6  | 6  | -10 | 2.21  | 0.43 |
| 5  | -6 | -10 | 8.64  | 0.74 |
| -5 | -6 | 10  | 9.36  | 0.74 |
| -5 | -6 | 10  | 9.20  | 0.58 |
| 5  | 6  | -10 | 8.79  | 0.64 |
| -5 | 6  | 10  | 8.74  | 0.60 |
| -4 | -6 | 10  | 2.13  | 0.38 |
| 4  | -6 | -10 | 3.58  | 0.58 |
| -4 | -6 | 10  | 2.95  | 0.49 |
| 4  | -6 | -10 | 2.95  | 0.41 |
| 4  | 6  | -10 | 2.64  | 0.41 |
| -4 | 6  | 10  | 2.63  | 0.43 |
| 3  | -6 | -10 | 3.41  | 0.44 |
| -3 | -6 | 10  | 3.15  | 0.51 |
| 3  | -6 | -10 | 3.88  | 0.58 |
| -3 | -6 | 10  | 2.21  | 0.39 |
| 3  | 6  | -10 | 4.67  | 0.46 |
| -3 | 6  | 10  | 3.05  | 0.41 |
| -2 | -6 | 10  | 2.85  | 0.46 |
| -2 | -6 | 10  | 3.17  | 0.45 |
| 2  | -6 | -10 | 2.97  | 0.43 |
| 2  | 6  | -10 | 2.26  | 0.36 |
| -2 | 6  | 10  | 2.39  | 0.36 |
| 1  | -6 | -10 | 2.01  | 0.40 |
| -1 | -6 | 10  | 1.79  | 0.43 |
| -1 | 6  | 10  | 1.96  | 0.49 |
| 1  | 6  | -10 | 2.10  | 0.44 |
| 1  | 6  | -10 | 1.31  | 0.30 |
| -1 | 6  | 10  | 1.67  | 0.35 |
| 0  | -6 | 10  | -0.33 | 0.35 |
| 0  | -6 | -10 | 0.11  | 0.34 |

|     |    |     |       |      |
|-----|----|-----|-------|------|
| 0   | 6  | 10  | -0.62 | 0.33 |
| 0   | 6  | -10 | 0.04  | 0.32 |
| 0   | 6  | 10  | 0.09  | 0.25 |
| 1   | -6 | 10  | 1.29  | 0.39 |
| -1  | -6 | -10 | 0.92  | 0.39 |
| 1   | 6  | 10  | 0.80  | 0.40 |
| 1   | 6  | 10  | 0.84  | 0.31 |
| -1  | 6  | -10 | 0.11  | 0.34 |
| 2   | -6 | 10  | 0.38  | 0.40 |
| -2  | -6 | -10 | 0.05  | 0.37 |
| -2  | 6  | -10 | 0.17  | 0.34 |
| 2   | 6  | 10  | 0.14  | 0.24 |
| 2   | 6  | 10  | 0.32  | 0.44 |
| -3  | -6 | -10 | -0.29 | 0.38 |
| 3   | -6 | 10  | -0.14 | 0.35 |
| -3  | 6  | -10 | -0.01 | 0.35 |
| 3   | 6  | 10  | 0.43  | 0.42 |
| -4  | -6 | -10 | 1.40  | 0.49 |
| 4   | -6 | 10  | 1.02  | 0.49 |
| -4  | 6  | -10 | 1.78  | 0.48 |
| 4   | 6  | 10  | 2.23  | 0.60 |
| 5   | -6 | 10  | 0.27  | 0.47 |
| -5  | -6 | -10 | -0.56 | 0.42 |
| -5  | 6  | -10 | -0.25 | 0.41 |
| 5   | 6  | 10  | 0.48  | 0.55 |
| 6   | -6 | 10  | 0.62  | 0.47 |
| -6  | -6 | -10 | 0.27  | 0.48 |
| -6  | 6  | -10 | 1.07  | 0.52 |
| 6   | 6  | 10  | 0.99  | 0.61 |
| -13 | 7  | 10  | -0.05 | 0.75 |
| -12 | -7 | 10  | 0.14  | 0.50 |
| 12  | -7 | -10 | -0.62 | 0.52 |
| 12  | 7  | -10 | 0.42  | 0.49 |
| -12 | 7  | 10  | 0.65  | 0.51 |
| 11  | -7 | -10 | 0.11  | 0.52 |
| -11 | -7 | 10  | -0.05 | 0.43 |
| 11  | 7  | -10 | 0.46  | 0.46 |
| -11 | 7  | 10  | 0.16  | 0.40 |
| -10 | -7 | 10  | 0.20  | 0.43 |
| 10  | -7 | -10 | -0.49 | 0.50 |
| -10 | 7  | 10  | 0.37  | 0.47 |
| 10  | 7  | -10 | -0.62 | 0.36 |
| -9  | -7 | 10  | 0.92  | 0.43 |
| 9   | -7 | -10 | -0.35 | 0.48 |
| -9  | 7  | 10  | 0.37  | 0.39 |
| 9   | 7  | -10 | 0.19  | 0.39 |

|    |    |     |       |      |
|----|----|-----|-------|------|
| -8 | -7 | 10  | 0.79  | 0.39 |
| 8  | -7 | -10 | 0.18  | 0.47 |
| 8  | 7  | -10 | 0.66  | 0.39 |
| -8 | 7  | 10  | 0.40  | 0.41 |
| 7  | -7 | -10 | -0.18 | 0.45 |
| -7 | -7 | 10  | 0.09  | 0.41 |
| 7  | 7  | -10 | -0.05 | 0.33 |
| -7 | 7  | 10  | -0.31 | 0.32 |
| -6 | -7 | 10  | 3.14  | 0.55 |
| 6  | -7 | -10 | 3.23  | 0.60 |
| -6 | 7  | 10  | 2.86  | 0.48 |
| 6  | 7  | -10 | 3.09  | 0.46 |
| 5  | -7 | -10 | 2.17  | 0.52 |
| -5 | -7 | 10  | 1.47  | 0.42 |
| 5  | 7  | -10 | 1.00  | 0.39 |
| -5 | 7  | 10  | 1.46  | 0.41 |
| -4 | -7 | 10  | 3.21  | 0.42 |
| 4  | -7 | -10 | 4.03  | 0.57 |
| -4 | -7 | 10  | 4.12  | 0.57 |
| 4  | 7  | -10 | 3.93  | 0.46 |
| -4 | 7  | 10  | 2.92  | 0.44 |
| -3 | -7 | 10  | 1.39  | 0.37 |
| 3  | -7 | -10 | 1.23  | 0.48 |
| 3  | -7 | -10 | 0.99  | 0.38 |
| -3 | -7 | 10  | 1.67  | 0.45 |
| -3 | 7  | 10  | 0.80  | 0.33 |
| 3  | 7  | -10 | 0.70  | 0.30 |
| -2 | -7 | 10  | 0.71  | 0.38 |
| 2  | -7 | -10 | -0.18 | 0.33 |
| 2  | -7 | -10 | 0.88  | 0.43 |
| -2 | 7  | 10  | 1.03  | 0.34 |
| 2  | 7  | -10 | 1.13  | 0.33 |
| -1 | -7 | 10  | -0.09 | 0.35 |
| 1  | -7 | -10 | -0.22 | 0.33 |
| -1 | 7  | 10  | -0.26 | 0.39 |
| 1  | 7  | -10 | 0.15  | 0.34 |
| -1 | 7  | 10  | -0.16 | 0.29 |
| 0  | -7 | -10 | 0.65  | 0.36 |
| 0  | -7 | 10  | 0.18  | 0.39 |
| 0  | 7  | 10  | 0.03  | 0.38 |
| 0  | 7  | -10 | 0.22  | 0.35 |
| 0  | 7  | 10  | 0.26  | 0.27 |
| 1  | -7 | 10  | 2.65  | 0.47 |
| -1 | -7 | -10 | 2.37  | 0.48 |
| -1 | 7  | -10 | 2.77  | 0.51 |
| 1  | 7  | 10  | 2.61  | 0.56 |

|     |    |     |       |      |
|-----|----|-----|-------|------|
| 1   | 7  | 10  | 2.95  | 0.42 |
| -2  | -7 | -10 | 0.11  | 0.38 |
| 2   | -7 | 10  | 1.18  | 0.46 |
| -2  | 7  | -10 | 0.32  | 0.38 |
| 2   | 7  | 10  | 0.75  | 0.32 |
| 2   | 7  | 10  | 0.28  | 0.39 |
| -3  | -7 | -10 | 0.36  | 0.38 |
| 3   | -7 | 10  | 0.28  | 0.45 |
| 3   | 7  | 10  | 0.35  | 0.48 |
| -3  | 7  | -10 | 0.25  | 0.36 |
| 4   | -7 | 10  | 0.46  | 0.48 |
| -4  | -7 | -10 | -0.43 | 0.43 |
| 4   | 7  | 10  | -0.66 | 0.48 |
| -4  | 7  | -10 | 0.50  | 0.43 |
| -5  | -7 | -10 | 0.23  | 0.43 |
| 5   | -7 | 10  | 0.83  | 0.51 |
| -5  | 7  | -10 | 1.02  | 0.49 |
| 5   | 7  | 10  | 0.68  | 0.55 |
| 6   | 7  | 10  | -0.62 | 0.59 |
| -6  | 7  | -10 | -0.45 | 0.43 |
| -12 | 8  | 10  | -0.14 | 0.44 |
| -11 | -8 | 10  | 0.34  | 0.53 |
| 11  | -8 | -10 | -0.08 | 0.54 |
| -11 | 8  | 10  | 0.26  | 0.48 |
| 11  | 8  | -10 | 0.68  | 0.48 |
| 10  | -8 | -10 | -0.83 | 0.52 |
| -10 | -8 | 10  | -0.05 | 0.48 |
| -10 | 8  | 10  | -0.69 | 0.38 |
| 10  | 8  | -10 | 0.17  | 0.43 |
| -9  | -8 | 10  | 0.65  | 0.47 |
| 9   | -8 | -10 | -0.01 | 0.52 |
| -9  | 8  | 10  | 1.27  | 0.50 |
| 9   | 8  | -10 | 0.59  | 0.42 |
| 8   | -8 | -10 | 0.35  | 0.55 |
| -8  | -8 | 10  | 0.83  | 0.47 |
| 8   | 8  | -10 | 0.57  | 0.41 |
| -8  | 8  | 10  | 0.64  | 0.42 |
| 7   | -8 | -10 | 0.60  | 0.52 |
| -7  | -8 | 10  | 0.23  | 0.38 |
| -7  | 8  | 10  | 0.75  | 0.39 |
| 7   | 8  | -10 | 0.52  | 0.39 |
| 6   | -8 | -10 | 0.35  | 0.49 |
| -6  | -8 | 10  | 0.55  | 0.38 |
| -6  | 8  | 10  | 0.51  | 0.36 |
| 6   | 8  | -10 | 0.17  | 0.36 |
| -5  | -8 | 10  | 2.46  | 0.51 |

|    |    |     |       |      |
|----|----|-----|-------|------|
| -5 | -8 | 10  | 1.89  | 0.40 |
| 5  | -8 | -10 | 2.08  | 0.52 |
| 5  | 8  | -10 | 2.70  | 0.44 |
| -5 | 8  | 10  | 3.54  | 0.48 |
| 4  | -8 | -10 | 1.61  | 0.50 |
| -4 | -8 | 10  | 1.56  | 0.48 |
| -4 | -8 | 10  | 1.49  | 0.38 |
| -4 | 8  | 10  | 1.66  | 0.38 |
| 4  | 8  | -10 | 2.09  | 0.40 |
| -3 | -8 | 10  | 0.50  | 0.36 |
| 3  | -8 | -10 | -0.28 | 0.39 |
| -3 | -8 | 10  | -0.23 | 0.32 |
| 3  | -8 | -10 | 0.47  | 0.38 |
| 3  | 8  | -10 | 0.07  | 0.34 |
| -3 | 8  | 10  | 0.25  | 0.33 |
| -2 | -8 | 10  | 0.05  | 0.36 |
| 2  | -8 | -10 | 0.77  | 0.42 |
| 2  | -8 | -10 | -0.24 | 0.34 |
| 2  | 8  | -10 | 0.19  | 0.30 |
| -2 | 8  | 10  | 0.43  | 0.34 |
| 2  | 8  | -10 | 0.24  | 0.32 |
| 1  | -8 | -10 | 2.71  | 0.50 |
| -1 | -8 | 10  | 2.29  | 0.48 |
| -1 | 8  | 10  | 2.52  | 0.43 |
| 1  | 8  | -10 | 2.37  | 0.45 |
| 0  | -8 | -10 | 1.93  | 0.50 |
| 0  | -8 | 10  | 2.23  | 0.50 |
| 0  | 8  | 10  | 1.57  | 0.50 |
| 0  | 8  | -10 | 2.64  | 0.49 |
| 0  | 8  | 10  | 1.58  | 0.35 |
| -1 | -8 | -10 | -0.34 | 0.39 |
| 1  | -8 | 10  | 0.09  | 0.41 |
| -1 | 8  | -10 | 0.31  | 0.34 |
| 1  | 8  | 10  | 0.59  | 0.45 |
| 1  | 8  | 10  | 0.23  | 0.31 |
| 2  | -8 | 10  | 0.50  | 0.41 |
| -2 | -8 | -10 | 0.70  | 0.47 |
| 2  | 8  | 10  | -0.17 | 0.45 |
| 2  | 8  | 10  | 0.32  | 0.30 |
| -2 | 8  | -10 | 0.25  | 0.39 |
| -3 | -8 | -10 | -0.09 | 0.39 |
| 3  | -8 | 10  | 0.15  | 0.40 |
| 3  | 8  | 10  | 0.19  | 0.53 |
| 3  | 8  | 10  | -0.47 | 0.45 |
| -3 | 8  | -10 | -0.51 | 0.39 |
| -4 | -8 | -10 | 0.82  | 0.52 |

|     |    |     |       |      |
|-----|----|-----|-------|------|
| 4   | -8 | 10  | 0.21  | 0.49 |
| 4   | 8  | 10  | 0.36  | 0.53 |
| -4  | 8  | -10 | 0.25  | 0.39 |
| 5   | -8 | 10  | -0.14 | 0.44 |
| -5  | -8 | -10 | -0.58 | 0.47 |
| -5  | 8  | -10 | 0.59  | 0.50 |
| 5   | 8  | 10  | 0.09  | 0.55 |
| -11 | -9 | 10  | 0.00  | 0.55 |
| -11 | 9  | 10  | 0.27  | 0.50 |
| 10  | -9 | -10 | -0.10 | 0.55 |
| -10 | -9 | 10  | 0.55  | 0.51 |
| 10  | 9  | -10 | -0.03 | 0.45 |
| -10 | 9  | 10  | 0.43  | 0.48 |
| -9  | -9 | 10  | -0.04 | 0.49 |
| 9   | -9 | -10 | -0.09 | 0.49 |
| -9  | 9  | 10  | -0.35 | 0.46 |
| 9   | 9  | -10 | 0.83  | 0.45 |
| 8   | -9 | -10 | 0.29  | 0.56 |
| -8  | -9 | 10  | 0.81  | 0.48 |
| 8   | 9  | -10 | 0.38  | 0.43 |
| -8  | 9  | 10  | -0.20 | 0.40 |
| -7  | -9 | 10  | 0.58  | 0.47 |
| 7   | -9 | -10 | -0.02 | 0.51 |
| 7   | 9  | -10 | -0.22 | 0.42 |
| -7  | 9  | 10  | -0.21 | 0.42 |
| -6  | -9 | 10  | 1.09  | 0.43 |
| 6   | -9 | -10 | 1.32  | 0.58 |
| 6   | 9  | -10 | 1.41  | 0.43 |
| -6  | 9  | 10  | 1.61  | 0.44 |
| 5   | -9 | -10 | 0.26  | 0.46 |
| -5  | -9 | 10  | 0.16  | 0.40 |
| -5  | 9  | 10  | 0.17  | 0.35 |
| -5  | 9  | 10  | 0.05  | 0.38 |
| 5   | 9  | -10 | 0.41  | 0.37 |
| -4  | -9 | 10  | 1.73  | 0.48 |
| -4  | -9 | 10  | 1.55  | 0.42 |
| 4   | -9 | -10 | 1.51  | 0.52 |
| -4  | 9  | 10  | 0.98  | 0.39 |
| 4   | 9  | -10 | 2.26  | 0.47 |
| -3  | -9 | 10  | 0.38  | 0.36 |
| 3   | -9 | -10 | 0.49  | 0.46 |
| 3   | -9 | -10 | -0.30 | 0.39 |
| -3  | -9 | 10  | -0.63 | 0.37 |
| 3   | 9  | -10 | -0.37 | 0.33 |
| -3  | 9  | 10  | 0.25  | 0.33 |
| -2  | -9 | 10  | 2.02  | 0.46 |



|     |     |     |       |      |
|-----|-----|-----|-------|------|
| 2   | -9  | -10 | 2.68  | 0.56 |
| 2   | -9  | -10 | 0.85  | 0.46 |
| 2   | 9   | -10 | 1.40  | 0.49 |
| -2  | 9   | 10  | 2.72  | 0.47 |
| 2   | 9   | -10 | 2.03  | 0.41 |
| 1   | -9  | -10 | 0.29  | 0.43 |
| 1   | -9  | -10 | 0.80  | 0.47 |
| -1  | -9  | 10  | -0.04 | 0.39 |
| 1   | 9   | -10 | 0.51  | 0.40 |
| -1  | 9   | 10  | 0.57  | 0.36 |
| 0   | -9  | -10 | -0.34 | 0.36 |
| 0   | -9  | 10  | 0.45  | 0.42 |
| 0   | 9   | -10 | -0.21 | 0.32 |
| 0   | 9   | 10  | 0.12  | 0.30 |
| 0   | 9   | 10  | -0.19 | 0.45 |
| 1   | -9  | 10  | 0.86  | 0.47 |
| -1  | -9  | -10 | 0.89  | 0.49 |
| -1  | 9   | -10 | 0.62  | 0.44 |
| 1   | 9   | 10  | 0.58  | 0.37 |
| 1   | 9   | 10  | 1.03  | 0.50 |
| -2  | -9  | -10 | 0.04  | 0.47 |
| 2   | -9  | 10  | 0.90  | 0.45 |
| 2   | 9   | 10  | 0.30  | 0.51 |
| -2  | 9   | -10 | 0.49  | 0.44 |
| 2   | 9   | 10  | 1.03  | 0.35 |
| 3   | -9  | 10  | 0.65  | 0.45 |
| -3  | -9  | -10 | -0.07 | 0.43 |
| 3   | 9   | 10  | 0.97  | 0.39 |
| -3  | 9   | -10 | 1.57  | 0.48 |
| 3   | 9   | 10  | 1.89  | 0.59 |
| 4   | -9  | 10  | -0.28 | 0.41 |
| -4  | -9  | -10 | -0.34 | 0.45 |
| -4  | 9   | -10 | 0.57  | 0.48 |
| 4   | 9   | 10  | 0.29  | 0.53 |
| 5   | 9   | 10  | 0.22  | 0.59 |
| -11 | 10  | 10  | 0.26  | 0.49 |
| -10 | -10 | 10  | 0.20  | 0.52 |
| 10  | -10 | -10 | -0.01 | 0.58 |
| -10 | 10  | 10  | 0.04  | 0.44 |
| -9  | -10 | 10  | 0.71  | 0.53 |
| 9   | -10 | -10 | -0.68 | 0.56 |
| 9   | 10  | -10 | 0.00  | 0.45 |
| -9  | 10  | 10  | 0.05  | 0.44 |
| 8   | -10 | -10 | 0.25  | 0.59 |
| -8  | -10 | 10  | 0.58  | 0.44 |
| 8   | 10  | -10 | 0.38  | 0.49 |

|    |     |     |       |      |
|----|-----|-----|-------|------|
| -8 | 10  | 10  | 0.57  | 0.44 |
| 7  | -10 | -10 | 0.36  | 0.58 |
| -7 | -10 | 10  | 0.73  | 0.50 |
| -7 | 10  | 10  | 0.46  | 0.49 |
| 7  | 10  | -10 | 0.13  | 0.43 |
| -6 | -10 | 10  | 0.47  | 0.39 |
| -6 | -10 | 10  | -0.14 | 0.38 |
| 6  | -10 | -10 | -0.81 | 0.47 |
| -6 | 10  | 10  | -0.17 | 0.38 |
| 6  | 10  | -10 | 0.11  | 0.40 |
| -5 | -10 | 10  | 0.06  | 0.38 |
| -5 | -10 | 10  | 0.34  | 0.39 |
| 5  | -10 | -10 | -0.20 | 0.50 |
| 5  | 10  | -10 | 0.14  | 0.38 |
| -5 | 10  | 10  | 0.22  | 0.38 |
| 4  | -10 | -10 | 0.47  | 0.52 |
| -4 | -10 | 10  | 0.63  | 0.40 |
| -4 | -10 | 10  | 0.42  | 0.45 |
| 4  | 10  | -10 | -0.48 | 0.40 |
| -4 | 10  | 10  | 0.36  | 0.38 |
| 3  | -10 | -10 | 1.04  | 0.51 |
| 3  | -10 | -10 | 1.35  | 0.54 |
| -3 | -10 | 10  | 1.18  | 0.45 |
| -3 | 10  | 10  | 1.09  | 0.45 |
| 3  | 10  | -10 | 1.05  | 0.39 |
| -2 | -10 | 10  | 0.37  | 0.41 |
| 2  | -10 | -10 | 0.22  | 0.48 |
| 2  | -10 | -10 | -0.24 | 0.45 |
| -2 | 10  | 10  | 0.45  | 0.36 |
| 2  | 10  | -10 | 0.21  | 0.42 |
| -1 | -10 | 10  | 0.04  | 0.41 |
| 1  | -10 | -10 | -0.07 | 0.43 |
| 1  | -10 | -10 | 0.05  | 0.47 |
| -1 | 10  | 10  | 0.27  | 0.35 |
| 1  | 10  | -10 | 0.56  | 0.44 |
| 0  | -10 | -10 | 2.19  | 0.54 |
| 0  | -10 | 10  | 1.04  | 0.49 |
| 0  | -10 | -10 | 1.04  | 0.48 |
| 0  | 10  | -10 | 0.87  | 0.47 |
| 0  | 10  | 10  | 1.37  | 0.39 |
| 1  | -10 | 10  | 0.90  | 0.46 |
| -1 | -10 | -10 | 0.29  | 0.51 |
| 1  | 10  | 10  | 0.57  | 0.38 |
| -1 | 10  | -10 | 0.34  | 0.40 |
| 1  | 10  | 10  | -0.80 | 0.49 |
| 2  | -10 | 10  | 1.01  | 0.52 |

-2 -10 -10 0.18 0.54  
-2 10 -10 0.79 0.43  
2 10 10 0.23 0.51  
2 10 10 0.41 0.34  
-3 -10 -10 0.29 0.57  
3 -10 10 0.21 0.52  
-3 10 -10 0.16 0.42  
3 10 10 -0.36 0.49  
3 10 10 -0.38 0.36  
4 10 10 -0.31 0.54  
-9 -11 10 -0.39 0.49  
9 -11 -10 -0.10 0.61  
-9 11 10 0.37 0.54  
-8 -11 10 0.36 0.52  
8 -11 -10 0.96 0.65  
-8 11 10 1.47 0.59  
8 11 -10 0.48 0.55  
-7 -11 10 0.24 0.43  
7 -11 -10 -0.18 0.59  
-7 11 10 0.43 0.46  
7 11 -10 -1.09 0.41  
6 -11 -10 -0.21 0.55  
-6 -11 10 0.28 0.41  
-6 -11 10 -0.31 0.38  
-6 11 10 -0.05 0.43  
6 11 -10 -0.67 0.40  
5 -11 -10 1.41 0.61  
-5 -11 10 0.26 0.41  
-5 -11 10 0.95 0.53  
5 11 -10 0.45 0.43  
-5 11 10 1.65 0.49  
-4 -11 10 0.18 0.41  
-4 -11 10 0.82 0.46  
4 -11 -10 0.21 0.55  
-4 11 10 0.10 0.42  
4 11 -10 0.42 0.45  
-3 -11 10 0.77 0.46  
3 -11 -10 0.84 0.57  
3 11 -10 0.85 0.47  
3 11 -10 1.07 0.50  
-3 11 10 1.05 0.46  
-2 -11 10 0.45 0.43  
2 -11 -10 0.40 0.52  
2 -11 -10 0.43 0.54  
-2 11 10 -0.21 0.41  
2 11 -10 -0.01 0.39

-1 -11 10 0.13 0.42  
1 -11 -10 0.51 0.52  
1 -11 -10 -0.87 0.49  
-1 11 10 -0.14 0.35  
1 11 -10 0.18 0.42  
0 -11 -10 -0.15 0.53  
0 -11 -10 1.21 0.54  
0 -11 10 0.26 0.46  
0 11 10 -0.08 0.37  
0 11 -10 0.24 0.40  
-1 -11 -10 -0.60 0.53  
1 -11 10 0.35 0.50  
1 11 10 0.58 0.42  
-1 11 -10 0.93 0.51  
-2 -11 -10 -0.61 0.46  
2 -11 10 0.57 0.50  
2 11 10 -0.31 0.55  
-2 11 -10 -0.19 0.41  
2 11 10 0.12 0.35  
3 11 10 0.52 0.60  
3 11 10 1.15 0.46  
8 -12 -10 -0.15 0.61  
-8 12 10 0.55 0.62  
7 -12 -10 0.65 0.65  
-7 -12 10 1.53 0.57  
7 12 -10 0.98 0.52  
-7 12 10 1.11 0.55  
6 -12 -10 -0.19 0.60  
-6 -12 10 -0.21 0.46  
-6 -12 10 0.21 0.45  
6 12 -10 0.57 0.54  
-6 12 10 -0.29 0.49  
5 -12 -10 -0.77 0.56  
-5 -12 10 0.50 0.49  
-5 -12 10 0.21 0.45  
-5 12 10 0.10 0.47  
5 12 -10 -0.11 0.41  
4 -12 -10 -0.34 0.54  
-4 -12 10 0.15 0.45  
-4 12 10 0.17 0.45  
4 12 -10 0.32 0.49  
4 12 -10 0.64 0.50  
3 -12 -10 0.84 0.57  
-3 -12 10 0.92 0.50  
3 12 -10 0.99 0.53  
-3 12 10 0.94 0.45

|     |     |     |       |      |
|-----|-----|-----|-------|------|
| 2   | -12 | -10 | -0.11 | 0.57 |
| 2   | -12 | -10 | -0.06 | 0.58 |
| -2  | -12 | 10  | 0.42  | 0.46 |
| 2   | 12  | -10 | -0.11 | 0.45 |
| -2  | 12  | 10  | -0.06 | 0.47 |
| 1   | -12 | -10 | -0.53 | 0.56 |
| -1  | -12 | 10  | 0.48  | 0.49 |
| 1   | -12 | -10 | 0.81  | 0.53 |
| 1   | 12  | -10 | -0.03 | 0.42 |
| -1  | 12  | 10  | 0.88  | 0.44 |
| 0   | -12 | 10  | 0.00  | 0.49 |
| 0   | -12 | -10 | -0.47 | 0.48 |
| 0   | -12 | -10 | 0.31  | 0.52 |
| 0   | 12  | 10  | 0.26  | 0.40 |
| 0   | 12  | -10 | -0.26 | 0.45 |
| -1  | -12 | -10 | 1.09  | 0.59 |
| 1   | -12 | 10  | 1.04  | 0.80 |
| -1  | -12 | -10 | -1.35 | 0.54 |
| 1   | 12  | 10  | -0.09 | 0.38 |
| 2   | 12  | 10  | 0.34  | 0.47 |
| 6   | -13 | -10 | -1.12 | 0.56 |
| 6   | 13  | -10 | 0.42  | 0.63 |
| -5  | -13 | 10  | -0.06 | 0.44 |
| 5   | -13 | -10 | -0.99 | 0.55 |
| 5   | 13  | -10 | 0.07  | 0.51 |
| 4   | -13 | -10 | -0.13 | 0.60 |
| -4  | -13 | 10  | 0.81  | 0.49 |
| 4   | 13  | -10 | -0.38 | 0.42 |
| 4   | 13  | -10 | 0.97  | 0.55 |
| 3   | -13 | -10 | 0.15  | 0.58 |
| -3  | -13 | 10  | 0.23  | 0.47 |
| 3   | 13  | -10 | -0.23 | 0.49 |
| 2   | -13 | -10 | -0.16 | 0.57 |
| 2   | -13 | -10 | 1.66  | 0.66 |
| -2  | -13 | 10  | 1.18  | 0.49 |
| 2   | 13  | -10 | 1.27  | 0.81 |
| 1   | -13 | -10 | -0.36 | 0.62 |
| 1   | -13 | -10 | 0.54  | 0.61 |
| 0   | -13 | -10 | -0.32 | 0.66 |
| 0   | -13 | -10 | 0.88  | 1.04 |
| 14  | 0   | -11 | 0.50  | 0.53 |
| 14  | 0   | -11 | 0.34  | 0.43 |
| 13  | 0   | -11 | -0.15 | 0.49 |
| 13  | 0   | -11 | 0.58  | 0.47 |
| -13 | 0   | 11  | -0.51 | 0.43 |
| 12  | 0   | -11 | 0.98  | 0.53 |

|     |   |     |       |      |
|-----|---|-----|-------|------|
| -12 | 0 | 11  | 0.60  | 0.45 |
| 12  | 0 | -11 | 0.93  | 0.48 |
| 11  | 0 | -11 | 0.95  | 0.43 |
| -11 | 0 | 11  | 0.45  | 0.44 |
| 11  | 0 | -11 | 0.94  | 0.50 |
| -10 | 0 | 11  | 0.72  | 0.42 |
| 10  | 0 | -11 | 0.41  | 0.45 |
| -10 | 0 | 11  | 0.13  | 0.34 |
| -9  | 0 | 11  | -0.03 | 0.37 |
| -9  | 0 | 11  | 0.40  | 0.34 |
| 9   | 0 | -11 | 0.12  | 0.41 |
| -8  | 0 | 11  | 0.19  | 0.34 |
| 8   | 0 | -11 | 0.23  | 0.42 |
| -8  | 0 | 11  | 0.59  | 0.37 |
| -7  | 0 | 11  | -0.32 | 0.30 |
| 7   | 0 | -11 | -0.40 | 0.38 |
| -7  | 0 | 11  | -0.11 | 0.28 |
| -6  | 0 | 11  | 3.58  | 0.44 |
| 6   | 0 | -11 | 3.85  | 0.54 |
| -6  | 0 | 11  | 4.68  | 0.48 |
| 5   | 0 | -11 | 0.76  | 0.37 |
| -5  | 0 | 11  | 0.13  | 0.30 |
| -5  | 0 | 11  | 0.06  | 0.27 |
| 4   | 0 | -11 | 1.65  | 0.28 |
| 4   | 0 | -11 | 1.94  | 0.45 |
| -4  | 0 | 11  | 0.90  | 0.34 |
| -4  | 0 | 11  | 1.08  | 0.34 |
| -3  | 0 | 11  | 6.89  | 0.52 |
| -3  | 0 | 11  | 6.82  | 0.57 |
| -3  | 0 | 11  | 6.63  | 0.50 |
| 3   | 0 | -11 | 7.09  | 0.47 |
| -2  | 0 | 11  | 0.59  | 0.28 |
| -2  | 0 | 11  | 1.41  | 0.41 |
| -2  | 0 | 11  | 1.09  | 0.33 |
| -2  | 0 | 11  | 1.11  | 0.41 |
| 2   | 0 | -11 | 1.46  | 0.30 |
| 1   | 0 | -11 | 7.06  | 0.46 |
| -1  | 0 | 11  | 6.14  | 0.59 |
| -1  | 0 | 11  | 9.05  | 0.68 |
| 1   | 0 | -11 | 6.44  | 0.54 |
| 0   | 0 | 11  | 0.57  | 0.39 |
| 0   | 0 | 11  | 0.61  | 0.42 |
| 0   | 0 | -11 | 1.00  | 0.29 |
| 0   | 0 | -11 | 1.35  | 0.35 |
| 0   | 0 | 11  | 1.30  | 0.28 |
| -1  | 0 | -11 | 3.20  | 0.47 |

|     |    |     |       |      |
|-----|----|-----|-------|------|
| 1   | 0  | 11  | 3.43  | 0.55 |
| 1   | 0  | 11  | 4.57  | 0.60 |
| 2   | 0  | 11  | 0.13  | 0.44 |
| -2  | 0  | -11 | 0.55  | 0.35 |
| 2   | 0  | 11  | 0.52  | 0.44 |
| 3   | 0  | 11  | 1.02  | 0.46 |
| 3   | 0  | 11  | 1.41  | 0.51 |
| -3  | 0  | -11 | 1.33  | 0.42 |
| -4  | 0  | -11 | 0.20  | 0.34 |
| 4   | 0  | 11  | -0.06 | 0.42 |
| -5  | 0  | -11 | -0.24 | 0.38 |
| 5   | 0  | 11  | 0.09  | 0.47 |
| 6   | 0  | 11  | 0.89  | 0.55 |
| -6  | 0  | -11 | 1.04  | 0.53 |
| 14  | -1 | -11 | 0.21  | 0.48 |
| 14  | -1 | -11 | 0.56  | 0.59 |
| 14  | 1  | -11 | -0.34 | 0.46 |
| -13 | -1 | 11  | -0.10 | 0.49 |
| 13  | -1 | -11 | 0.29  | 0.42 |
| 13  | -1 | -11 | -0.50 | 0.49 |
| 13  | 1  | -11 | -0.05 | 0.45 |
| -13 | 1  | 11  | 0.20  | 0.48 |
| 13  | 1  | -11 | 0.23  | 0.52 |
| -12 | -1 | 11  | 0.45  | 0.44 |
| 12  | -1 | -11 | 0.32  | 0.44 |
| 12  | -1 | -11 | -0.61 | 0.47 |
| 12  | 1  | -11 | 0.11  | 0.49 |
| 12  | 1  | -11 | -0.25 | 0.37 |
| -12 | 1  | 11  | 0.05  | 0.40 |
| -11 | -1 | 11  | 0.14  | 0.43 |
| 11  | -1 | -11 | 0.67  | 0.50 |
| 11  | 1  | -11 | 0.35  | 0.46 |
| -11 | 1  | 11  | 0.27  | 0.38 |
| -11 | 1  | 11  | -0.50 | 0.39 |
| 11  | 1  | -11 | 0.43  | 0.41 |
| 10  | -1 | -11 | 1.19  | 0.50 |
| -10 | -1 | 11  | 1.01  | 0.44 |
| 10  | 1  | -11 | 0.41  | 0.42 |
| -10 | 1  | 11  | 0.63  | 0.37 |
| -10 | 1  | 11  | 0.75  | 0.37 |
| 10  | 1  | -11 | 0.86  | 0.41 |
| 9   | -1 | -11 | -0.13 | 0.40 |
| -9  | -1 | 11  | 0.22  | 0.33 |
| -9  | 1  | 11  | -0.15 | 0.34 |
| -9  | 1  | 11  | 0.40  | 0.32 |
| 9   | 1  | -11 | 0.02  | 0.39 |

|    |    |     |       |      |
|----|----|-----|-------|------|
| -8 | -1 | 11  | 0.28  | 0.39 |
| 8  | -1 | -11 | -0.03 | 0.41 |
| -8 | -1 | 11  | -0.14 | 0.29 |
| 8  | 1  | -11 | -0.03 | 0.38 |
| -8 | 1  | 11  | 0.25  | 0.31 |
| -8 | 1  | 11  | 0.69  | 0.35 |
| -7 | -1 | 11  | 1.42  | 0.41 |
| -7 | -1 | 11  | 1.00  | 0.33 |
| 7  | -1 | -11 | 0.93  | 0.45 |
| -7 | 1  | 11  | 0.60  | 0.31 |
| -7 | 1  | 11  | 1.01  | 0.37 |
| 7  | 1  | -11 | 0.86  | 0.42 |
| 6  | -1 | -11 | 0.99  | 0.41 |
| -6 | -1 | 11  | 0.18  | 0.29 |
| -6 | -1 | 11  | 1.09  | 0.34 |
| -6 | 1  | 11  | 0.67  | 0.35 |
| 6  | 1  | -11 | 0.34  | 0.36 |
| -5 | -1 | 11  | 19.12 | 0.83 |
| 5  | -1 | -11 | 18.96 | 0.93 |
| -5 | -1 | 11  | 18.21 | 0.76 |
| -5 | 1  | 11  | 18.65 | 0.76 |
| 5  | 1  | -11 | 17.64 | 0.87 |
| -5 | 1  | 11  | 19.21 | 0.78 |
| 4  | -1 | -11 | 1.18  | 0.42 |
| -4 | -1 | 11  | 1.84  | 0.36 |
| 4  | -1 | -11 | 1.49  | 0.28 |
| -4 | -1 | 11  | 0.68  | 0.34 |
| 4  | 1  | -11 | 0.97  | 0.38 |
| -4 | 1  | 11  | 0.82  | 0.33 |
| -4 | 1  | 11  | 1.15  | 0.32 |
| -3 | -1 | 11  | 5.47  | 0.46 |
| 3  | -1 | -11 | 5.96  | 0.45 |
| -3 | 1  | 11  | 4.41  | 0.42 |
| -3 | 1  | 11  | 5.06  | 0.44 |
| -2 | -1 | 11  | 8.33  | 0.57 |
| 2  | -1 | -11 | 8.46  | 0.53 |
| -2 | -1 | 11  | 8.17  | 0.65 |
| -2 | -1 | 11  | 8.31  | 0.52 |
| -2 | 1  | 11  | 10.51 | 0.75 |
| -2 | 1  | 11  | 9.03  | 0.52 |
| -1 | -1 | 11  | 3.05  | 0.34 |
| 1  | -1 | -11 | 3.18  | 0.42 |
| -1 | -1 | 11  | 3.34  | 0.50 |
| 1  | 1  | -11 | 2.92  | 0.38 |
| -1 | 1  | 11  | 2.99  | 0.53 |
| 0  | -1 | 11  | 0.74  | 0.44 |



|     |    |     |       |      |
|-----|----|-----|-------|------|
| 0   | -1 | -11 | 1.12  | 0.32 |
| 0   | 1  | -11 | 0.96  | 0.31 |
| 0   | 1  | 11  | 0.72  | 0.26 |
| 0   | 1  | 11  | 0.76  | 0.44 |
| 1   | -1 | 11  | 1.70  | 0.46 |
| 1   | -1 | 11  | 2.67  | 0.53 |
| -1  | -1 | -11 | 2.35  | 0.40 |
| 1   | 1  | 11  | 3.08  | 0.57 |
| -1  | 1  | -11 | 2.32  | 0.41 |
| -1  | 1  | -11 | 1.87  | 0.36 |
| -2  | -1 | -11 | 0.31  | 0.32 |
| 2   | -1 | 11  | 1.16  | 0.50 |
| 2   | -1 | 11  | 0.40  | 0.46 |
| 2   | 1  | 11  | 0.51  | 0.45 |
| -2  | 1  | -11 | 0.55  | 0.31 |
| -3  | -1 | -11 | 0.39  | 0.38 |
| 3   | -1 | 11  | 0.82  | 0.54 |
| 3   | -1 | 11  | 0.83  | 0.44 |
| -3  | 1  | -11 | 0.73  | 0.35 |
| 3   | 1  | 11  | 1.22  | 0.52 |
| -4  | -1 | -11 | 0.07  | 0.40 |
| 4   | -1 | 11  | 0.62  | 0.45 |
| 4   | -1 | 11  | 0.21  | 0.48 |
| 4   | 1  | 11  | 0.22  | 0.42 |
| -4  | 1  | -11 | 0.57  | 0.36 |
| -5  | -1 | -11 | 1.04  | 0.43 |
| 5   | -1 | 11  | 2.41  | 0.58 |
| 5   | -1 | 11  | 1.08  | 0.56 |
| -5  | 1  | -11 | 1.27  | 0.47 |
| 5   | 1  | 11  | 1.39  | 0.56 |
| -6  | -1 | -11 | 0.56  | 0.42 |
| 6   | -1 | 11  | 3.04  | 0.64 |
| -6  | 1  | -11 | 1.17  | 0.51 |
| 6   | 1  | 11  | 2.25  | 0.60 |
| 14  | -2 | -11 | 1.06  | 0.52 |
| -13 | -2 | 11  | 0.03  | 0.50 |
| 13  | -2 | -11 | -0.45 | 0.53 |
| 13  | -2 | -11 | 0.09  | 0.46 |
| 13  | 2  | -11 | -0.29 | 0.47 |
| -13 | 2  | 11  | 0.08  | 0.47 |
| 12  | -2 | -11 | 0.35  | 0.51 |
| -12 | -2 | 11  | -0.14 | 0.45 |
| -12 | 2  | 11  | 0.50  | 0.46 |
| -12 | 2  | 11  | 0.45  | 0.46 |
| 12  | 2  | -11 | 0.09  | 0.39 |
| -11 | -2 | 11  | 0.08  | 0.40 |

|     |    |     |       |      |
|-----|----|-----|-------|------|
| 11  | -2 | -11 | -0.09 | 0.48 |
| -11 | 2  | 11  | 0.84  | 0.43 |
| 11  | 2  | -11 | 0.09  | 0.41 |
| -11 | 2  | 11  | -0.16 | 0.36 |
| -10 | -2 | 11  | 1.23  | 0.45 |
| 10  | -2 | -11 | 0.64  | 0.48 |
| 10  | 2  | -11 | 1.75  | 0.43 |
| -10 | 2  | 11  | 1.12  | 0.41 |
| 10  | 2  | -11 | 0.96  | 0.43 |
| -10 | 2  | 11  | 1.03  | 0.43 |
| -9  | -2 | 11  | -0.34 | 0.38 |
| 9   | -2 | -11 | 0.13  | 0.44 |
| -9  | 2  | 11  | 0.11  | 0.35 |
| 9   | 2  | -11 | 0.54  | 0.41 |
| 9   | 2  | -11 | 0.30  | 0.32 |
| -9  | 2  | 11  | 0.36  | 0.35 |
| -8  | -2 | 11  | 0.40  | 0.39 |
| 8   | -2 | -11 | -0.13 | 0.43 |
| 8   | 2  | -11 | -0.43 | 0.35 |
| -8  | 2  | 11  | 0.22  | 0.32 |
| -8  | 2  | 11  | -0.04 | 0.32 |
| 8   | 2  | -11 | 0.36  | 0.32 |
| -7  | -2 | 11  | 1.05  | 0.40 |
| 7   | -2 | -11 | 0.74  | 0.45 |
| -7  | 2  | 11  | 0.52  | 0.31 |
| 7   | 2  | -11 | 0.79  | 0.40 |
| -6  | -2 | 11  | 3.26  | 0.45 |
| 6   | -2 | -11 | 4.28  | 0.59 |
| -6  | -2 | 11  | 2.77  | 0.40 |
| 6   | 2  | -11 | 3.26  | 0.51 |
| -6  | 2  | 11  | 3.53  | 0.42 |
| -6  | 2  | 11  | 2.89  | 0.41 |
| -5  | -2 | 11  | 0.41  | 0.32 |
| 5   | -2 | -11 | 0.40  | 0.36 |
| -5  | -2 | 11  | 0.62  | 0.30 |
| 5   | 2  | -11 | 0.01  | 0.34 |
| -5  | 2  | 11  | 0.46  | 0.29 |
| 5   | 2  | -11 | 0.16  | 0.33 |
| -5  | 2  | 11  | 0.06  | 0.29 |
| 4   | -2 | -11 | 21.02 | 0.73 |
| -4  | -2 | 11  | 22.14 | 0.89 |
| 4   | -2 | -11 | 20.68 | 0.95 |
| -4  | -2 | 11  | 22.05 | 0.77 |
| -4  | 2  | 11  | 21.39 | 0.79 |
| 4   | 2  | -11 | 21.68 | 0.91 |
| 4   | 2  | -11 | 20.46 | 0.98 |

|    |    |     |       |      |
|----|----|-----|-------|------|
| -4 | 2  | 11  | 21.65 | 0.81 |
| 3  | -2 | -11 | 4.95  | 0.42 |
| -3 | -2 | 11  | 3.94  | 0.42 |
| -3 | -2 | 11  | 4.84  | 0.50 |
| 3  | 2  | -11 | 3.74  | 0.61 |
| -3 | 2  | 11  | 4.59  | 0.43 |
| 2  | -2 | -11 | 6.73  | 0.51 |
| -2 | -2 | 11  | 6.07  | 0.53 |
| -2 | -2 | 11  | 7.36  | 0.61 |
| -2 | -2 | 11  | 6.93  | 0.56 |
| -2 | 2  | 11  | 6.50  | 0.49 |
| -2 | 2  | 11  | 7.35  | 0.67 |
| -1 | -2 | 11  | -0.03 | 0.33 |
| 1  | -2 | -11 | 0.26  | 0.29 |
| -1 | -2 | 11  | 0.32  | 0.25 |
| -1 | -2 | 11  | 0.03  | 0.34 |
| 1  | 2  | -11 | 0.19  | 0.27 |
| -1 | 2  | 11  | -0.23 | 0.35 |
| -1 | 2  | 11  | 0.21  | 0.25 |
| 0  | -2 | 11  | 9.74  | 0.68 |
| 0  | -2 | 11  | 9.59  | 0.71 |
| 0  | -2 | -11 | 8.48  | 0.62 |
| 0  | 2  | -11 | 9.36  | 0.59 |
| 0  | 2  | 11  | 9.41  | 0.60 |
| 0  | 2  | 11  | 8.89  | 0.75 |
| -1 | -2 | -11 | 1.46  | 0.40 |
| 1  | -2 | 11  | 2.03  | 0.50 |
| 1  | -2 | 11  | 0.73  | 0.40 |
| 1  | 2  | 11  | 0.90  | 0.48 |
| -1 | 2  | -11 | 1.65  | 0.37 |
| -2 | -2 | -11 | 0.57  | 0.36 |
| 2  | -2 | 11  | 0.70  | 0.47 |
| 2  | 2  | 11  | 0.77  | 0.50 |
| -2 | 2  | -11 | 0.91  | 0.34 |
| 3  | -2 | 11  | 0.52  | 0.44 |
| 3  | -2 | 11  | 0.83  | 0.51 |
| -3 | -2 | -11 | 0.16  | 0.36 |
| 3  | 2  | 11  | 1.09  | 0.53 |
| -3 | 2  | -11 | 0.52  | 0.34 |
| -3 | 2  | -11 | 1.04  | 0.40 |
| 4  | -2 | 11  | 0.69  | 0.47 |
| 4  | -2 | 11  | 1.01  | 0.51 |
| -4 | -2 | -11 | 0.14  | 0.34 |
| 4  | 2  | 11  | 0.29  | 0.54 |
| -4 | 2  | -11 | 0.62  | 0.41 |
| -5 | -2 | -11 | 1.21  | 0.43 |

|     |    |     |       |      |
|-----|----|-----|-------|------|
| 5   | -2 | 11  | 0.77  | 0.55 |
| 5   | -2 | 11  | 1.29  | 0.53 |
| -5  | 2  | -11 | 0.97  | 0.46 |
| 5   | 2  | 11  | 1.13  | 0.54 |
| -6  | -2 | -11 | 0.28  | 0.47 |
| 6   | -2 | 11  | 0.91  | 0.66 |
| 6   | -2 | 11  | 0.70  | 0.54 |
| 6   | 2  | 11  | 0.78  | 0.55 |
| -6  | 2  | -11 | 0.69  | 0.49 |
| 14  | -3 | -11 | 0.62  | 0.49 |
| 13  | -3 | -11 | 0.50  | 0.55 |
| -13 | -3 | 11  | -0.16 | 0.50 |
| 13  | 3  | -11 | -0.34 | 0.48 |
| -13 | 3  | 11  | 0.41  | 0.49 |
| -12 | -3 | 11  | -0.30 | 0.40 |
| 12  | -3 | -11 | -0.52 | 0.46 |
| -12 | 3  | 11  | 0.31  | 0.46 |
| -12 | 3  | 11  | -0.32 | 0.38 |
| 12  | 3  | -11 | 0.19  | 0.41 |
| 11  | -3 | -11 | 0.95  | 0.54 |
| -11 | -3 | 11  | 0.97  | 0.45 |
| -11 | 3  | 11  | 1.68  | 0.48 |
| -11 | 3  | 11  | 1.28  | 0.44 |
| 11  | 3  | -11 | 0.03  | 0.42 |
| -10 | -3 | 11  | -0.44 | 0.35 |
| 10  | -3 | -11 | -0.46 | 0.43 |
| -10 | 3  | 11  | -0.14 | 0.34 |
| 10  | 3  | -11 | 0.26  | 0.39 |
| -10 | 3  | 11  | 0.26  | 0.36 |
| -9  | -3 | 11  | 1.12  | 0.46 |
| 9   | -3 | -11 | 1.25  | 0.49 |
| 9   | 3  | -11 | 0.58  | 0.36 |
| -9  | 3  | 11  | 0.97  | 0.38 |
| -9  | 3  | 11  | 1.37  | 0.40 |
| 8   | -3 | -11 | 1.79  | 0.53 |
| -8  | -3 | 11  | 1.68  | 0.43 |
| -8  | 3  | 11  | 0.83  | 0.46 |
| 8   | 3  | -11 | 1.82  | 0.42 |
| -8  | 3  | 11  | 1.96  | 0.40 |
| -7  | -3 | 11  | 5.07  | 0.58 |
| 7   | -3 | -11 | 4.15  | 0.62 |
| 7   | 3  | -11 | 4.09  | 0.50 |
| 7   | 3  | -11 | 4.46  | 0.53 |
| -7  | 3  | 11  | 5.41  | 0.51 |
| -7  | 3  | 11  | 5.94  | 0.56 |
| -6  | -3 | 11  | 1.46  | 0.39 |

|    |    |     |       |      |
|----|----|-----|-------|------|
| 6  | -3 | -11 | 1.88  | 0.50 |
| 6  | 3  | -11 | 1.28  | 0.39 |
| -6 | 3  | 11  | 1.69  | 0.36 |
| -6 | 3  | 11  | 1.84  | 0.40 |
| 6  | 3  | -11 | 1.09  | 0.39 |
| 5  | -3 | -11 | 3.35  | 0.55 |
| -5 | -3 | 11  | 3.44  | 0.51 |
| -5 | 3  | 11  | 1.76  | 0.35 |
| 5  | 3  | -11 | 4.27  | 0.47 |
| 5  | 3  | -11 | 3.55  | 0.47 |
| -4 | -3 | 11  | 1.77  | 0.34 |
| 4  | -3 | -11 | 1.31  | 0.29 |
| 4  | -3 | -11 | 1.52  | 0.45 |
| -4 | -3 | 11  | 1.07  | 0.39 |
| -4 | 3  | 11  | 1.89  | 0.33 |
| 4  | 3  | -11 | 1.29  | 0.35 |
| 4  | 3  | -11 | 0.71  | 0.29 |
| -3 | -3 | 11  | 3.02  | 0.59 |
| 3  | -3 | -11 | 3.49  | 0.39 |
| -3 | -3 | 11  | 4.12  | 0.50 |
| 3  | -3 | -11 | 3.41  | 0.54 |
| 3  | 3  | -11 | 3.06  | 0.60 |
| -3 | 3  | 11  | 3.18  | 0.42 |
| 3  | 3  | -11 | 2.64  | 0.36 |
| -2 | -3 | 11  | -0.06 | 0.31 |
| 2  | -3 | -11 | 0.27  | 0.26 |
| -2 | -3 | 11  | 0.30  | 0.34 |
| -2 | -3 | 11  | 0.11  | 0.34 |
| 2  | 3  | -11 | 0.07  | 0.24 |
| -2 | 3  | 11  | 0.71  | 0.31 |
| -2 | 3  | 11  | 0.56  | 0.42 |
| 2  | 3  | -11 | 0.49  | 0.35 |
| 1  | -3 | -11 | 2.48  | 0.39 |
| -1 | -3 | 11  | 2.37  | 0.40 |
| -1 | 3  | 11  | 3.11  | 0.39 |
| 1  | 3  | -11 | 2.19  | 0.33 |
| -1 | 3  | 11  | 2.57  | 0.47 |
| 1  | 3  | -11 | 2.45  | 0.40 |
| 0  | -3 | 11  | 4.83  | 0.56 |
| 0  | -3 | -11 | 3.74  | 0.44 |
| 0  | -3 | 11  | 4.83  | 0.51 |
| 0  | 3  | 11  | 4.98  | 0.60 |
| 0  | 3  | -11 | 5.46  | 0.51 |
| 1  | -3 | 11  | 2.65  | 0.50 |
| -1 | -3 | -11 | 1.33  | 0.39 |
| 1  | -3 | 11  | 1.98  | 0.46 |

-1 3 -11 2.06 0.39  
1 3 11 2.45 0.39  
1 3 11 2.18 0.53  
-2 -3 -11 1.05 0.39  
2 -3 11 1.17 0.44  
2 -3 11 1.12 0.41  
-2 3 -11 1.09 0.34  
2 3 11 1.86 0.54  
3 -3 11 0.37 0.38  
3 -3 11 -0.30 0.38  
-3 -3 -11 0.59 0.35  
-3 3 -11 0.93 0.37  
3 3 11 0.45 0.51  
-4 -3 -11 0.40 0.37  
4 -3 11 0.72 0.48  
-4 3 -11 0.48 0.37  
4 3 11 0.24 0.53  
-5 -3 -11 0.26 0.42  
5 -3 11 -0.34 0.47  
5 -3 11 0.29 0.46  
5 3 11 -0.16 0.56  
-5 3 -11 -0.04 0.39  
6 -3 11 2.23 0.59  
6 -3 11 2.13 0.66  
-6 -3 -11 1.89 0.55  
-6 3 -11 2.26 0.54  
6 3 11 1.31 0.57  
-13 -4 11 0.44 0.60  
13 -4 -11 -0.81 0.52  
13 4 -11 -0.36 0.48  
-13 4 11 0.44 0.46  
-13 4 11 0.39 0.48  
12 -4 -11 0.42 0.54  
-12 -4 11 0.66 0.54  
12 4 -11 0.05 0.48  
-12 4 11 0.10 0.47  
-12 4 11 0.01 0.41  
-11 -4 11 0.11 0.47  
11 -4 -11 0.21 0.51  
-11 4 11 0.39 0.44  
-11 4 11 0.36 0.41  
11 4 -11 0.23 0.45  
-10 -4 11 1.20 0.45  
10 -4 -11 -0.20 0.48  
-10 4 11 1.16 0.46  
-10 4 11 0.52 0.38

|    |    |     |       |      |
|----|----|-----|-------|------|
| 10 | 4  | -11 | -0.26 | 0.33 |
| 9  | -4 | -11 | 0.48  | 0.46 |
| -9 | -4 | 11  | 0.15  | 0.41 |
| -9 | 4  | 11  | 0.30  | 0.35 |
| -9 | 4  | 11  | 0.31  | 0.35 |
| 9  | 4  | -11 | -0.02 | 0.34 |
| -8 | -4 | 11  | 0.78  | 0.39 |
| 8  | -4 | -11 | 0.99  | 0.49 |
| 8  | 4  | -11 | 0.53  | 0.37 |
| -8 | 4  | 11  | 0.52  | 0.35 |
| -8 | 4  | 11  | 0.24  | 0.51 |
| -7 | -4 | 11  | 1.55  | 0.42 |
| 7  | -4 | -11 | 1.95  | 0.55 |
| -7 | 4  | 11  | 1.27  | 0.36 |
| 7  | 4  | -11 | 1.47  | 0.38 |
| 6  | -4 | -11 | 6.75  | 0.70 |
| -6 | -4 | 11  | 8.52  | 0.70 |
| 6  | 4  | -11 | 9.19  | 0.67 |
| -6 | 4  | 11  | 8.32  | 0.57 |
| -5 | -4 | 11  | 0.33  | 0.34 |
| 5  | -4 | -11 | 0.51  | 0.39 |
| -5 | -4 | 11  | -0.63 | 0.33 |
| 5  | 4  | -11 | 0.32  | 0.30 |
| -5 | 4  | 11  | -0.18 | 0.25 |
| 4  | -4 | -11 | 2.60  | 0.51 |
| -4 | -4 | 11  | 1.49  | 0.36 |
| -4 | -4 | 11  | 1.79  | 0.44 |
| -4 | 4  | 11  | 2.19  | 0.38 |
| 4  | 4  | -11 | 2.12  | 0.40 |
| -3 | -4 | 11  | 2.64  | 0.39 |
| -3 | -4 | 11  | 2.58  | 0.47 |
| 3  | -4 | -11 | 1.63  | 0.42 |
| 3  | -4 | -11 | 3.28  | 0.40 |
| 3  | 4  | -11 | 3.14  | 0.46 |
| 3  | 4  | -11 | 2.55  | 0.39 |
| -3 | 4  | 11  | 2.41  | 0.37 |
| 2  | -4 | -11 | 2.44  | 0.38 |
| -2 | -4 | 11  | 2.39  | 0.45 |
| -2 | -4 | 11  | 2.06  | 0.41 |
| -2 | -4 | 11  | 3.09  | 0.48 |
| 2  | 4  | -11 | 1.82  | 0.34 |
| -2 | 4  | 11  | 2.56  | 0.53 |
| -2 | 4  | 11  | 2.47  | 0.38 |
| 1  | -4 | -11 | 1.31  | 0.34 |
| -1 | -4 | 11  | 1.92  | 0.42 |
| -1 | -4 | 11  | 2.14  | 0.43 |

|     |    |     |       |      |
|-----|----|-----|-------|------|
| -1  | 4  | 11  | 1.78  | 0.35 |
| 1   | 4  | -11 | 1.33  | 0.37 |
| 1   | 4  | -11 | 1.74  | 0.32 |
| -1  | 4  | 11  | 0.86  | 0.46 |
| 0   | -4 | -11 | 0.84  | 0.35 |
| 0   | -4 | 11  | 0.63  | 0.40 |
| 0   | -4 | 11  | 0.58  | 0.40 |
| 0   | 4  | -11 | 0.48  | 0.33 |
| 0   | 4  | 11  | 0.87  | 0.40 |
| 0   | 4  | 11  | 0.51  | 0.29 |
| -1  | -4 | -11 | 0.02  | 0.28 |
| 1   | -4 | 11  | 0.44  | 0.39 |
| 1   | 4  | 11  | 0.86  | 0.49 |
| -1  | 4  | -11 | 1.04  | 0.36 |
| 2   | -4 | 11  | 1.21  | 0.45 |
| -2  | -4 | -11 | 1.72  | 0.43 |
| 2   | -4 | 11  | 2.26  | 0.49 |
| 2   | 4  | 11  | 2.47  | 0.57 |
| -2  | 4  | -11 | 1.61  | 0.40 |
| -3  | -4 | -11 | 0.78  | 0.40 |
| 3   | -4 | 11  | 0.87  | 0.44 |
| 3   | -4 | 11  | 0.86  | 0.42 |
| -3  | 4  | -11 | 0.62  | 0.37 |
| 3   | 4  | 11  | 0.43  | 0.49 |
| 4   | -4 | 11  | -0.03 | 0.43 |
| -4  | -4 | -11 | 0.22  | 0.41 |
| 4   | -4 | 11  | 0.12  | 0.46 |
| -4  | 4  | -11 | -0.06 | 0.36 |
| 4   | 4  | 11  | 0.18  | 0.56 |
| -5  | -4 | -11 | 1.85  | 0.53 |
| 5   | -4 | 11  | 2.24  | 0.56 |
| 5   | 4  | 11  | 1.32  | 0.58 |
| -5  | 4  | -11 | 1.58  | 0.48 |
| -6  | -4 | -11 | 0.22  | 0.49 |
| 6   | -4 | 11  | 0.96  | 0.52 |
| 6   | -4 | 11  | -0.33 | 0.55 |
| 6   | 4  | 11  | -0.06 | 0.71 |
| -6  | 4  | -11 | 0.59  | 0.46 |
| -13 | 5  | 11  | 0.50  | 0.44 |
| -13 | 5  | 11  | -0.47 | 0.49 |
| 12  | -5 | -11 | -0.25 | 0.50 |
| -12 | -5 | 11  | 0.23  | 0.52 |
| -12 | 5  | 11  | 0.20  | 0.45 |
| 12  | 5  | -11 | 0.35  | 0.45 |
| -12 | 5  | 11  | -0.04 | 0.40 |
| 11  | -5 | -11 | -0.18 | 0.52 |



|     |    |     |       |      |
|-----|----|-----|-------|------|
| -11 | -5 | 11  | 0.08  | 0.44 |
| -11 | 5  | 11  | 0.63  | 0.42 |
| 11  | 5  | -11 | -0.42 | 0.43 |
| -11 | 5  | 11  | 1.36  | 0.50 |
| -10 | -5 | 11  | 0.67  | 0.43 |
| 10  | -5 | -11 | 0.09  | 0.50 |
| 10  | 5  | -11 | 0.24  | 0.43 |
| -10 | 5  | 11  | 0.17  | 0.42 |
| -10 | 5  | 11  | 0.22  | 0.39 |
| -9  | -5 | 11  | -0.14 | 0.42 |
| 9   | -5 | -11 | -0.39 | 0.45 |
| 9   | 5  | -11 | -0.13 | 0.34 |
| -9  | 5  | 11  | 0.07  | 0.40 |
| 8   | -5 | -11 | -0.77 | 0.43 |
| -8  | -5 | 11  | -0.19 | 0.34 |
| -8  | 5  | 11  | -0.68 | 0.30 |
| 8   | 5  | -11 | 0.22  | 0.35 |
| -7  | -5 | 11  | 1.69  | 0.48 |
| 7   | -5 | -11 | 1.21  | 0.53 |
| 7   | 5  | -11 | 1.34  | 0.38 |
| -7  | 5  | 11  | 1.59  | 0.38 |
| -6  | -5 | 11  | 0.96  | 0.43 |
| 6   | -5 | -11 | 0.68  | 0.46 |
| 6   | 5  | -11 | 0.71  | 0.37 |
| -6  | 5  | 11  | 0.26  | 0.30 |
| -5  | -5 | 11  | 2.92  | 0.47 |
| -5  | -5 | 11  | 3.37  | 0.40 |
| 5   | -5 | -11 | 2.80  | 0.53 |
| 5   | 5  | -11 | 3.29  | 0.46 |
| -5  | 5  | 11  | 3.50  | 0.44 |
| -4  | -5 | 11  | 0.12  | 0.38 |
| 4   | -5 | -11 | 0.18  | 0.41 |
| -4  | 5  | 11  | 0.28  | 0.28 |
| 4   | 5  | -11 | 0.09  | 0.28 |
| -3  | -5 | 11  | 2.05  | 0.48 |
| 3   | -5 | -11 | 2.70  | 0.41 |
| -3  | -5 | 11  | 2.48  | 0.42 |
| 3   | -5 | -11 | 2.76  | 0.51 |
| -3  | 5  | 11  | 2.54  | 0.41 |
| 3   | 5  | -11 | 2.80  | 0.39 |
| 2   | -5 | -11 | 1.51  | 0.36 |
| -2  | -5 | 11  | 1.56  | 0.39 |
| -2  | 5  | 11  | 2.13  | 0.35 |
| 2   | 5  | -11 | 1.60  | 0.33 |
| -2  | 5  | 11  | 1.98  | 0.51 |
| -1  | -5 | 11  | 3.66  | 0.50 |

|     |    |     |       |      |
|-----|----|-----|-------|------|
| 1   | -5 | -11 | 3.60  | 0.44 |
| -1  | 5  | 11  | 3.70  | 0.42 |
| -1  | 5  | 11  | 4.88  | 0.62 |
| 1   | 5  | -11 | 3.51  | 0.50 |
| 0   | -5 | 11  | 2.14  | 0.47 |
| 0   | -5 | -11 | 0.90  | 0.37 |
| 0   | 5  | 11  | 1.50  | 0.34 |
| 0   | 5  | -11 | 1.58  | 0.37 |
| 0   | 5  | 11  | 1.62  | 0.50 |
| -1  | -5 | -11 | 3.13  | 0.49 |
| 1   | -5 | 11  | 2.48  | 0.47 |
| 1   | 5  | 11  | 2.22  | 0.48 |
| -1  | 5  | -11 | 2.32  | 0.44 |
| 1   | 5  | 11  | 2.94  | 0.40 |
| -2  | -5 | -11 | 0.07  | 0.37 |
| 2   | -5 | 11  | 0.01  | 0.41 |
| -2  | 5  | -11 | -0.30 | 0.32 |
| 2   | 5  | 11  | -0.62 | 0.38 |
| 3   | -5 | 11  | 0.36  | 0.44 |
| -3  | -5 | -11 | -0.01 | 0.40 |
| -3  | 5  | -11 | 0.21  | 0.36 |
| 3   | 5  | 11  | 0.46  | 0.46 |
| -4  | -5 | -11 | -0.16 | 0.42 |
| 4   | -5 | 11  | -0.28 | 0.52 |
| 4   | -5 | 11  | -0.06 | 0.45 |
| -4  | 5  | -11 | -0.16 | 0.38 |
| 4   | 5  | 11  | 0.36  | 0.54 |
| 5   | -5 | 11  | 0.49  | 0.52 |
| 5   | -5 | 11  | 0.01  | 0.50 |
| -5  | -5 | -11 | 0.10  | 0.40 |
| -5  | 5  | -11 | 0.71  | 0.46 |
| 5   | 5  | 11  | 0.65  | 0.60 |
| 6   | -5 | 11  | 0.52  | 0.54 |
| -6  | 5  | -11 | 1.57  | 0.51 |
| -13 | 6  | 11  | -0.26 | 0.51 |
| 12  | -6 | -11 | -0.30 | 0.54 |
| -12 | -6 | 11  | 0.93  | 0.56 |
| 12  | 6  | -11 | 0.79  | 0.54 |
| -12 | 6  | 11  | 0.33  | 0.50 |
| -11 | -6 | 11  | 0.17  | 0.45 |
| 11  | -6 | -11 | -0.12 | 0.54 |
| 11  | 6  | -11 | 0.16  | 0.49 |
| -11 | 6  | 11  | -0.10 | 0.42 |
| 10  | -6 | -11 | 0.44  | 0.55 |
| -10 | -6 | 11  | 0.11  | 0.48 |
| 10  | 6  | -11 | 0.74  | 0.44 |

|     |    |     |       |      |
|-----|----|-----|-------|------|
| -10 | 6  | 11  | -0.03 | 0.39 |
| -9  | -6 | 11  | -0.38 | 0.43 |
| 9   | -6 | -11 | 0.16  | 0.51 |
| 9   | 6  | -11 | 0.02  | 0.37 |
| -9  | 6  | 11  | 0.22  | 0.38 |
| -8  | -6 | 11  | 1.00  | 0.42 |
| 8   | -6 | -11 | 0.89  | 0.51 |
| 8   | 6  | -11 | 0.75  | 0.42 |
| -8  | 6  | 11  | 0.54  | 0.42 |
| -7  | -6 | 11  | 0.12  | 0.42 |
| 7   | -6 | -11 | 0.62  | 0.49 |
| 7   | 6  | -11 | 0.47  | 0.36 |
| -7  | 6  | 11  | 0.82  | 0.37 |
| -6  | -6 | 11  | 1.66  | 0.44 |
| 6   | -6 | -11 | 0.25  | 0.41 |
| -6  | 6  | 11  | 2.02  | 0.41 |
| 6   | 6  | -11 | 0.86  | 0.37 |
| -5  | -6 | 11  | 2.77  | 0.40 |
| 5   | -6 | -11 | 2.68  | 0.55 |
| -5  | -6 | 11  | 1.92  | 0.45 |
| 5   | 6  | -11 | 2.11  | 0.41 |
| -5  | 6  | 11  | 2.06  | 0.44 |
| 4   | -6 | -11 | 0.00  | 0.39 |
| -4  | -6 | 11  | -0.20 | 0.37 |
| -4  | -6 | 11  | 0.19  | 0.31 |
| -4  | 6  | 11  | -0.31 | 0.27 |
| 4   | 6  | -11 | -0.10 | 0.28 |
| 3   | -6 | -11 | 3.51  | 0.58 |
| 3   | -6 | -11 | 1.66  | 0.40 |
| -3  | -6 | 11  | 2.24  | 0.46 |
| -3  | -6 | 11  | 2.59  | 0.43 |
| 3   | 6  | -11 | 2.70  | 0.41 |
| -3  | 6  | 11  | 2.61  | 0.39 |
| -2  | -6 | 11  | 0.61  | 0.37 |
| 2   | -6 | -11 | 0.88  | 0.35 |
| -2  | 6  | 11  | 0.44  | 0.29 |
| 2   | 6  | -11 | 0.53  | 0.31 |
| 1   | -6 | -11 | 0.03  | 0.33 |
| -1  | -6 | 11  | 0.77  | 0.39 |
| 1   | 6  | -11 | 0.21  | 0.34 |
| -1  | 6  | 11  | 0.12  | 0.43 |
| -1  | 6  | 11  | 0.09  | 0.30 |
| 0   | -6 | 11  | 2.14  | 0.44 |
| 0   | -6 | -11 | 2.59  | 0.48 |
| 0   | 6  | 11  | 2.45  | 0.39 |
| 0   | 6  | 11  | 2.10  | 0.53 |

|     |    |     |       |      |
|-----|----|-----|-------|------|
| 0   | 6  | -11 | 2.42  | 0.46 |
| -1  | -6 | -11 | 0.06  | 0.37 |
| 1   | -6 | 11  | 0.09  | 0.41 |
| 1   | 6  | 11  | 0.31  | 0.48 |
| -1  | 6  | -11 | -0.03 | 0.34 |
| 1   | 6  | 11  | 0.16  | 0.25 |
| -2  | -6 | -11 | 0.31  | 0.40 |
| 2   | -6 | 11  | 1.03  | 0.48 |
| -2  | 6  | -11 | 0.91  | 0.41 |
| 2   | 6  | 11  | 0.71  | 0.49 |
| -3  | -6 | -11 | 3.14  | 0.59 |
| 3   | -6 | 11  | 2.75  | 0.58 |
| -3  | 6  | -11 | 2.25  | 0.50 |
| 3   | 6  | 11  | 2.95  | 0.61 |
| 4   | -6 | 11  | 0.35  | 0.49 |
| -4  | -6 | -11 | 0.65  | 0.43 |
| -4  | 6  | -11 | 0.96  | 0.43 |
| 4   | 6  | 11  | 1.13  | 0.60 |
| 5   | -6 | 11  | 0.65  | 0.47 |
| -5  | -6 | -11 | 0.61  | 0.50 |
| -5  | 6  | -11 | 0.45  | 0.45 |
| 5   | 6  | 11  | 1.12  | 0.63 |
| -6  | 6  | -11 | -0.70 | 0.44 |
| -12 | 7  | 11  | -0.40 | 0.43 |
| 11  | -7 | -11 | -0.04 | 0.53 |
| -11 | -7 | 11  | 0.05  | 0.52 |
| 11  | 7  | -11 | -0.02 | 0.45 |
| -11 | 7  | 11  | 0.64  | 0.45 |
| 10  | -7 | -11 | 0.35  | 0.55 |
| -10 | -7 | 11  | -0.42 | 0.46 |
| 10  | 7  | -11 | 0.74  | 0.45 |
| -10 | 7  | 11  | 0.25  | 0.43 |
| 9   | -7 | -11 | 0.13  | 0.53 |
| -9  | -7 | 11  | 0.74  | 0.45 |
| 9   | 7  | -11 | 1.28  | 0.51 |
| -9  | 7  | 11  | 1.35  | 0.44 |
| 8   | -7 | -11 | -0.34 | 0.51 |
| -8  | -7 | 11  | 0.37  | 0.40 |
| 8   | 7  | -11 | -0.01 | 0.36 |
| -8  | 7  | 11  | 0.10  | 0.37 |
| 7   | -7 | -11 | 0.43  | 0.49 |
| -7  | -7 | 11  | 0.16  | 0.42 |
| 7   | 7  | -11 | -0.44 | 0.38 |
| -7  | 7  | 11  | 0.33  | 0.37 |
| 6   | -7 | -11 | 1.97  | 0.55 |
| -6  | -7 | 11  | 2.01  | 0.52 |

|    |    |     |       |      |
|----|----|-----|-------|------|
| 6  | 7  | -11 | 0.74  | 0.39 |
| -6 | 7  | 11  | 2.26  | 0.48 |
| 5  | -7 | -11 | 0.32  | 0.41 |
| -5 | -7 | 11  | 0.29  | 0.37 |
| 5  | 7  | -11 | -0.38 | 0.29 |
| -5 | 7  | 11  | 1.27  | 0.40 |
| 4  | -7 | -11 | 3.03  | 0.55 |
| -4 | -7 | 11  | 3.89  | 0.48 |
| -4 | -7 | 11  | 3.34  | 0.51 |
| 4  | 7  | -11 | 3.34  | 0.49 |
| -4 | 7  | 11  | 3.55  | 0.47 |
| 3  | -7 | -11 | 0.84  | 0.38 |
| 3  | -7 | -11 | 0.76  | 0.45 |
| -3 | -7 | 11  | 1.91  | 0.42 |
| -3 | -7 | 11  | 0.98  | 0.45 |
| 3  | 7  | -11 | 0.87  | 0.37 |
| -3 | 7  | 11  | 1.00  | 0.34 |
| 2  | -7 | -11 | 1.47  | 0.42 |
| 2  | -7 | -11 | 1.52  | 0.46 |
| -2 | -7 | 11  | 1.01  | 0.40 |
| 2  | 7  | -11 | 1.52  | 0.41 |
| 2  | 7  | -11 | 1.46  | 0.37 |
| -2 | 7  | 11  | 1.70  | 0.36 |
| 1  | -7 | -11 | 1.43  | 0.41 |
| -1 | -7 | 11  | 1.32  | 0.44 |
| 1  | 7  | -11 | 1.46  | 0.43 |
| -1 | 7  | 11  | 0.97  | 0.31 |
| -1 | 7  | 11  | 1.38  | 0.50 |
| 0  | -7 | -11 | -0.26 | 0.35 |
| 0  | -7 | 11  | -0.09 | 0.37 |
| 0  | 7  | -11 | 0.23  | 0.36 |
| 0  | 7  | 11  | 0.17  | 0.45 |
| 0  | 7  | 11  | -0.41 | 0.29 |
| -1 | -7 | -11 | 1.60  | 0.48 |
| 1  | -7 | 11  | 1.76  | 0.45 |
| 1  | 7  | 11  | 2.29  | 0.56 |
| 1  | 7  | 11  | 1.08  | 0.37 |
| -1 | 7  | -11 | 1.76  | 0.44 |
| 2  | -7 | 11  | 0.99  | 0.44 |
| -2 | -7 | -11 | 2.94  | 0.57 |
| -2 | 7  | -11 | 0.86  | 0.44 |
| 2  | 7  | 11  | 2.48  | 0.58 |
| 2  | 7  | 11  | 2.05  | 0.46 |
| -3 | -7 | -11 | -0.34 | 0.43 |
| 3  | -7 | 11  | 0.33  | 0.47 |
| -3 | 7  | -11 | -0.23 | 0.40 |

|     |    |     |       |      |
|-----|----|-----|-------|------|
| 3   | 7  | 11  | -0.08 | 0.50 |
| 4   | -7 | 11  | 2.34  | 0.61 |
| -4  | -7 | -11 | 1.35  | 0.57 |
| 4   | 7  | 11  | 1.70  | 0.63 |
| -4  | 7  | -11 | 1.02  | 0.47 |
| -5  | 7  | -11 | -0.38 | 0.43 |
| -12 | 8  | 11  | -0.17 | 0.57 |
| 11  | -8 | -11 | -0.45 | 0.59 |
| -11 | -8 | 11  | 0.04  | 0.52 |
| 11  | 8  | -11 | 0.66  | 0.50 |
| -11 | 8  | 11  | -0.15 | 0.42 |
| -10 | -8 | 11  | 1.32  | 0.51 |
| 10  | -8 | -11 | 2.86  | 0.72 |
| -10 | 8  | 11  | 2.21  | 0.58 |
| 10  | 8  | -11 | 1.74  | 0.54 |
| 9   | -8 | -11 | -0.08 | 0.55 |
| -9  | -8 | 11  | 0.51  | 0.44 |
| -9  | 8  | 11  | -0.04 | 0.46 |
| 9   | 8  | -11 | 0.22  | 0.43 |
| 8   | -8 | -11 | -0.25 | 0.52 |
| -8  | -8 | 11  | 0.50  | 0.46 |
| -8  | 8  | 11  | -0.05 | 0.39 |
| 8   | 8  | -11 | 0.82  | 0.44 |
| 7   | -8 | -11 | 0.30  | 0.54 |
| -7  | -8 | 11  | -0.08 | 0.43 |
| 7   | 8  | -11 | -0.42 | 0.36 |
| -7  | 8  | 11  | 0.02  | 0.37 |
| 6   | -8 | -11 | 0.57  | 0.50 |
| -6  | -8 | 11  | 0.33  | 0.39 |
| 6   | 8  | -11 | -0.04 | 0.35 |
| -6  | 8  | 11  | 0.40  | 0.38 |
| -5  | -8 | 11  | 0.74  | 0.36 |
| -5  | -8 | 11  | 0.14  | 0.37 |
| 5   | -8 | -11 | 0.64  | 0.49 |
| -5  | 8  | 11  | 0.66  | 0.37 |
| 5   | 8  | -11 | 0.07  | 0.37 |
| -4  | -8 | 11  | 0.42  | 0.42 |
| -4  | -8 | 11  | -0.08 | 0.32 |
| 4   | -8 | -11 | 0.15  | 0.47 |
| 4   | 8  | -11 | -0.14 | 0.36 |
| -4  | 8  | 11  | -0.23 | 0.34 |
| 3   | -8 | -11 | 2.22  | 0.50 |
| -3  | -8 | 11  | 3.56  | 0.61 |
| 3   | -8 | -11 | 3.17  | 0.60 |
| -3  | -8 | 11  | 2.51  | 0.45 |
| -3  | 8  | 11  | 3.76  | 0.48 |

|     |    |     |       |      |
|-----|----|-----|-------|------|
| 3   | 8  | -11 | 3.06  | 0.46 |
| -2  | -8 | 11  | 1.06  | 0.40 |
| 2   | -8 | -11 | -0.33 | 0.38 |
| 2   | -8 | -11 | 0.32  | 0.45 |
| -2  | 8  | 11  | 0.57  | 0.35 |
| 2   | 8  | -11 | 0.03  | 0.33 |
| -1  | -8 | 11  | -0.16 | 0.38 |
| 1   | -8 | -11 | -0.05 | 0.38 |
| 1   | 8  | -11 | 0.09  | 0.33 |
| -1  | 8  | 11  | 0.21  | 0.29 |
| 0   | -8 | -11 | 0.05  | 0.41 |
| 0   | -8 | 11  | -0.25 | 0.40 |
| 0   | 8  | 11  | 0.35  | 0.34 |
| 0   | 8  | -11 | -0.12 | 0.33 |
| 0   | 8  | 11  | -0.40 | 0.45 |
| -1  | -8 | -11 | 1.20  | 0.45 |
| 1   | -8 | 11  | 1.74  | 0.52 |
| 1   | 8  | 11  | 0.94  | 0.37 |
| -1  | 8  | -11 | 0.85  | 0.41 |
| 1   | 8  | 11  | 0.58  | 0.48 |
| 2   | -8 | 11  | 0.32  | 0.47 |
| -2  | -8 | -11 | 0.57  | 0.47 |
| -2  | 8  | -11 | 0.00  | 0.37 |
| 2   | 8  | 11  | 0.00  | 0.53 |
| 2   | 8  | 11  | 0.83  | 0.38 |
| -3  | -8 | -11 | 0.95  | 0.51 |
| 3   | -8 | 11  | 0.72  | 0.47 |
| 3   | 8  | 11  | 1.19  | 0.58 |
| -3  | 8  | -11 | 1.49  | 0.50 |
| -4  | -8 | -11 | -0.58 | 0.40 |
| 4   | -8 | 11  | -0.07 | 0.50 |
| 4   | 8  | 11  | -0.76 | 0.51 |
| -4  | 8  | -11 | -0.49 | 0.43 |
| -11 | 9  | 11  | 0.41  | 0.53 |
| 10  | -9 | -11 | 0.50  | 0.65 |
| -10 | -9 | 11  | 0.85  | 0.57 |
| 10  | 9  | -11 | 0.29  | 0.49 |
| -10 | 9  | 11  | 1.17  | 0.56 |
| 9   | -9 | -11 | 0.86  | 0.64 |
| -9  | -9 | 11  | 0.98  | 0.55 |
| -9  | 9  | 11  | 0.37  | 0.50 |
| 9   | 9  | -11 | 0.58  | 0.53 |
| 8   | -9 | -11 | -0.38 | 0.57 |
| -8  | -9 | 11  | -0.12 | 0.47 |
| -8  | 9  | 11  | -0.05 | 0.42 |
| 8   | 9  | -11 | -0.48 | 0.46 |

|    |    |     |       |      |
|----|----|-----|-------|------|
| 7  | -9 | -11 | 0.46  | 0.60 |
| -7 | -9 | 11  | 0.38  | 0.43 |
| 7  | 9  | -11 | 0.84  | 0.45 |
| -7 | 9  | 11  | 0.75  | 0.46 |
| -6 | -9 | 11  | 0.47  | 0.48 |
| 6  | -9 | -11 | -0.07 | 0.48 |
| -6 | 9  | 11  | 0.60  | 0.47 |
| 6  | 9  | -11 | 0.57  | 0.41 |
| -5 | -9 | 11  | 0.80  | 0.39 |
| 5  | -9 | -11 | -0.20 | 0.49 |
| -5 | -9 | 11  | -0.09 | 0.37 |
| 5  | 9  | -11 | 0.62  | 0.44 |
| -5 | 9  | 11  | -0.21 | 0.40 |
| -4 | -9 | 11  | 0.39  | 0.36 |
| 4  | -9 | -11 | 0.68  | 0.52 |
| -4 | -9 | 11  | 0.26  | 0.40 |
| -4 | 9  | 11  | 0.47  | 0.38 |
| 4  | 9  | -11 | 0.94  | 0.41 |
| -3 | -9 | 11  | 0.91  | 0.41 |
| 3  | -9 | -11 | 0.92  | 0.50 |
| 3  | 9  | -11 | 0.29  | 0.38 |
| -3 | 9  | 11  | 0.27  | 0.37 |
| 2  | -9 | -11 | 0.34  | 0.46 |
| 2  | -9 | 11  | -0.58 | 0.41 |
| -2 | -9 | 11  | 0.34  | 0.36 |
| 2  | 9  | -11 | 0.42  | 0.43 |
| -2 | 9  | 11  | -0.28 | 0.30 |
| -1 | -9 | 11  | 1.04  | 0.48 |
| 1  | -9 | -11 | -0.09 | 0.43 |
| 1  | -9 | 11  | 0.70  | 0.48 |
| -1 | 9  | 11  | 0.15  | 0.31 |
| 1  | 9  | -11 | 1.02  | 0.46 |
| 0  | -9 | -11 | 1.28  | 0.51 |
| 0  | -9 | 11  | 2.48  | 0.55 |
| 0  | 9  | -11 | 2.03  | 0.52 |
| 0  | 9  | 11  | 1.93  | 0.40 |
| 0  | 9  | 11  | 1.16  | 0.55 |
| 1  | -9 | 11  | 0.48  | 0.49 |
| -1 | -9 | -11 | -0.05 | 0.46 |
| 1  | 9  | 11  | 0.13  | 0.52 |
| -1 | 9  | -11 | -0.36 | 0.42 |
| 1  | 9  | 11  | 0.61  | 0.38 |
| 2  | -9 | 11  | -0.13 | 0.47 |
| -2 | -9 | -11 | -0.31 | 0.49 |
| 2  | 9  | 11  | 0.46  | 0.37 |
| 2  | 9  | 11  | 0.28  | 0.50 |



-2 9 -11 -0.11 0.39  
3 -9 11 0.54 0.47  
-3 -9 -11 0.24 0.49  
3 9 11 0.11 0.58  
-3 9 -11 0.50 0.47  
-10 10 11 0.82 0.62  
-9 -10 11 0.48 0.48  
9 -10 -11 -0.61 0.57  
9 10 -11 0.63 0.50  
-9 10 11 0.29 0.52  
-8 -10 11 2.00 0.60  
8 -10 -11 0.92 0.64  
8 10 -11 -0.11 0.45  
-8 10 11 1.18 0.52  
7 -10 -11 0.01 0.60  
-7 -10 11 0.36 0.43  
-7 10 11 0.53 0.44  
7 10 -11 -0.07 0.43  
-6 -10 11 1.24 0.53  
6 -10 -11 0.23 0.59  
-6 10 11 1.64 0.55  
6 10 -11 0.60 0.43  
-5 -10 11 0.12 0.46  
5 -10 -11 1.11 0.60  
-5 -10 11 0.85 0.43  
-5 10 11 -0.03 0.39  
5 10 -11 -0.28 0.38  
-4 -10 11 0.27 0.47  
-4 -10 11 0.99 0.42  
4 -10 -11 0.34 0.53  
-4 10 11 0.74 0.45  
4 10 -11 0.60 0.44  
-3 -10 11 1.77 0.49  
3 -10 -11 1.94 0.62  
3 10 -11 1.37 0.46  
-3 10 11 1.71 0.46  
2 -10 -11 0.16 0.50  
-2 -10 11 0.72 0.46  
2 -10 -11 0.10 0.50  
2 10 -11 0.58 0.43  
-2 10 11 0.98 0.40  
1 -10 -11 1.27 0.55  
1 -10 -11 1.51 0.56  
-1 -10 11 0.69 0.48  
1 10 -11 0.74 0.40  
-1 10 11 1.27 0.45

|          |       |      |
|----------|-------|------|
| 0-10-11  | 0.06  | 0.49 |
| 0-10-11  | 1.45  | 0.53 |
| 0-10-11  | 1.50  | 0.48 |
| 0-10-11  | 0.83  | 0.38 |
| 0-10-11  | 1.36  | 0.53 |
| 1-10-11  | 1.05  | 0.47 |
| -1-10-11 | 0.56  | 0.47 |
| 1-10-11  | 0.64  | 0.58 |
| -1-10-11 | 0.40  | 0.49 |
| 1-10-11  | 0.38  | 0.35 |
| 2-10-11  | 0.62  | 0.53 |
| -2-10-11 | 0.04  | 0.55 |
| 2-10-11  | 0.70  | 0.58 |
| -2-10-11 | 0.76  | 0.51 |
| 2-10-11  | 1.07  | 0.43 |
| 3-10-11  | 0.09  | 0.93 |
| 8-11-11  | 0.54  | 0.64 |
| -8-11-11 | 0.96  | 0.57 |
| -8-11-11 | 1.08  | 0.59 |
| 8-11-11  | -0.30 | 0.54 |
| -7-11-11 | 0.43  | 0.46 |
| 7-11-11  | 1.53  | 0.69 |
| 7-11-11  | 0.61  | 0.48 |
| -7-11-11 | 1.01  | 0.58 |
| -6-11-11 | 0.09  | 0.43 |
| 6-11-11  | -0.66 | 0.57 |
| -6-11-11 | 0.28  | 0.49 |
| 6-11-11  | 0.18  | 0.45 |
| -5-11-11 | 0.61  | 0.44 |
| -5-11-11 | 0.36  | 0.49 |
| 5-11-11  | 0.31  | 0.60 |
| -5-11-11 | 0.57  | 0.52 |
| 5-11-11  | 1.07  | 0.52 |
| 4-11-11  | 0.41  | 0.61 |
| -4-11-11 | 1.51  | 0.51 |
| 4-11-11  | 1.34  | 0.53 |
| -4-11-11 | 1.23  | 0.52 |
| -3-11-11 | 0.76  | 0.48 |
| 3-11-11  | -0.05 | 0.55 |
| -3-11-11 | 0.48  | 0.43 |
| 3-11-11  | 0.62  | 0.49 |
| 2-11-11  | 0.40  | 0.55 |
| 2-11-11  | -0.37 | 0.51 |
| -2-11-11 | 0.55  | 0.47 |
| 2-11-11  | 0.31  | 0.41 |
| -2-11-11 | -0.06 | 0.37 |

|    |     |     |       |      |
|----|-----|-----|-------|------|
| 1  | -11 | -11 | 0.02  | 0.52 |
| -1 | -11 | 11  | 0.76  | 0.49 |
| 1  | -11 | -11 | 0.06  | 0.56 |
| 1  | 11  | -11 | -0.14 | 0.43 |
| -1 | 11  | 11  | 0.46  | 0.40 |
| 0  | -11 | -11 | 2.00  | 0.67 |
| 0  | -11 | -11 | 1.85  | 0.61 |
| 0  | -11 | 11  | 1.85  | 0.58 |
| 0  | 11  | 11  | 1.20  | 0.43 |
| 0  | 11  | -11 | 1.41  | 0.55 |
| 1  | -11 | 11  | 0.96  | 0.62 |
| -1 | -11 | -11 | -0.50 | 0.56 |
| 1  | 11  | 11  | 0.26  | 0.41 |
| 2  | 11  | 11  | 0.08  | 0.41 |
| 6  | -12 | -11 | -0.49 | 0.62 |
| 6  | 12  | -11 | -0.22 | 0.52 |
| 5  | -12 | -11 | 0.78  | 0.66 |
| -5 | -12 | 11  | 0.66  | 0.51 |
| -5 | -12 | 11  | 1.30  | 0.49 |
| -5 | 12  | 11  | 1.16  | 0.52 |
| 5  | 12  | -11 | -0.26 | 0.48 |
| 4  | -12 | -11 | -0.28 | 0.54 |
| -4 | -12 | 11  | 0.26  | 0.44 |
| 4  | 12  | -11 | 0.15  | 0.51 |
| 4  | 12  | -11 | 0.29  | 0.57 |
| -4 | 12  | 11  | 0.57  | 0.47 |
| 3  | -12 | -11 | 0.20  | 0.58 |
| -3 | -12 | 11  | 0.59  | 0.49 |
| -3 | 12  | 11  | 0.68  | 0.54 |
| 3  | 12  | -11 | 0.33  | 0.51 |
| 2  | -12 | -11 | 0.19  | 0.58 |
| -2 | -12 | 11  | 0.35  | 0.51 |
| 2  | 12  | -11 | -0.27 | 0.48 |
| -2 | 12  | 11  | 0.26  | 0.46 |
| -1 | -12 | 11  | 0.18  | 0.45 |
| 1  | -12 | -11 | 0.29  | 0.54 |
| 1  | -12 | -11 | 0.12  | 0.58 |
| -1 | 12  | 11  | 0.58  | 0.53 |
| 0  | -12 | -11 | -0.81 | 0.56 |
| 0  | -12 | -11 | -0.05 | 0.54 |
| -5 | -13 | 11  | 0.64  | 0.52 |
| 5  | 13  | -11 | 0.40  | 0.63 |
| 4  | -13 | -11 | 0.21  | 1.01 |
| 3  | -13 | -11 | -0.44 | 0.67 |
| 2  | -13 | -11 | -0.45 | 0.91 |
| 14 | 0   | -12 | -0.28 | 0.61 |

|     |       |       |      |
|-----|-------|-------|------|
| 13  | 0 -12 | -0.36 | 0.48 |
| -13 | 0 12  | 0.46  | 0.52 |
| 13  | 0 -12 | 0.74  | 0.51 |
| 12  | 0 -12 | 0.91  | 0.45 |
| 12  | 0 -12 | -0.15 | 0.52 |
| -12 | 0 12  | 0.40  | 0.47 |
| 11  | 0 -12 | 0.78  | 0.45 |
| -11 | 0 12  | 0.06  | 0.37 |
| 11  | 0 -12 | -0.16 | 0.46 |
| 10  | 0 -12 | 0.09  | 0.44 |
| -10 | 0 12  | 0.12  | 0.40 |
| -10 | 0 12  | -0.18 | 0.39 |
| -9  | 0 12  | 3.09  | 0.51 |
| 9   | 0 -12 | 2.13  | 0.54 |
| -9  | 0 12  | 2.31  | 0.43 |
| -8  | 0 12  | 6.75  | 0.64 |
| 8   | 0 -12 | 7.63  | 0.74 |
| -8  | 0 12  | 6.53  | 0.58 |
| -7  | 0 12  | 22.14 | 0.93 |
| 7   | 0 -12 | 22.10 | 1.04 |
| -7  | 0 12  | 19.46 | 0.86 |
| -6  | 0 12  | -0.01 | 0.30 |
| 6   | 0 -12 | 0.80  | 0.44 |
| -6  | 0 12  | 0.19  | 0.33 |
| -5  | 0 12  | 6.04  | 0.54 |
| 5   | 0 -12 | 4.90  | 0.60 |
| 4   | 0 -12 | 18.93 | 0.93 |
| -4  | 0 12  | 17.49 | 0.78 |
| 4   | 0 -12 | 19.23 | 0.75 |
| -4  | 0 12  | 19.03 | 0.81 |
| -3  | 0 12  | -0.33 | 0.30 |
| 3   | 0 -12 | -0.06 | 0.24 |
| -3  | 0 12  | -0.30 | 0.29 |
| -3  | 0 12  | -0.56 | 0.35 |
| -2  | 0 12  | 16.54 | 0.83 |
| -2  | 0 12  | 15.60 | 0.87 |
| 2   | 0 -12 | 15.30 | 0.72 |
| -2  | 0 12  | 14.58 | 0.69 |
| -1  | 0 12  | 4.06  | 0.59 |
| 1   | 0 -12 | 3.50  | 0.45 |
| -1  | 0 12  | 4.58  | 0.61 |
| -1  | 0 12  | 3.49  | 0.40 |
| 0   | 0 -12 | 0.02  | 0.27 |
| 0   | 0 12  | -0.06 | 0.44 |
| 0   | 0 12  | 0.65  | 0.48 |
| 1   | 0 12  | 0.22  | 0.48 |

-1 0 -12 0.19 0.32  
1 0 12 0.72 0.47  
-2 0 -12 1.09 0.40  
2 0 12 1.18 0.54  
2 0 12 0.91 0.49  
3 0 12 0.18 0.51  
-3 0 -12 -0.09 0.39  
4 0 12 0.08 0.56  
-4 0 -12 -0.39 0.34  
-5 0 -12 0.09 0.45  
5 0 12 -0.37 0.49  
13 -1 -12 0.12 0.53  
-13 -1 12 0.08 0.50  
13 -1 -12 0.41 0.44  
-13 1 12 0.54 0.51  
13 1 -12 0.55 0.49  
12 -1 -12 -0.38 0.50  
-12 -1 12 0.11 0.47  
12 -1 -12 0.15 0.41  
12 1 -12 0.06 0.66  
12 1 -12 -0.33 0.38  
-12 1 12 -0.45 0.43  
-11 -1 12 0.95 0.49  
11 -1 -12 0.99 0.55  
-11 1 12 1.03 0.48  
11 1 -12 1.34 0.46  
11 1 -12 0.33 0.49  
-11 1 12 0.72 0.43  
-10 -1 12 0.17 0.41  
10 -1 -12 0.26 0.49  
10 1 -12 -0.47 0.44  
-10 1 12 0.39 0.38  
-10 1 12 0.71 0.42  
10 1 -12 0.71 0.42  
9 -1 -12 0.62 0.47  
-9 -1 12 0.88 0.39  
-9 1 12 1.00 0.39  
9 1 -12 0.83 0.46  
-9 1 12 0.70 0.40  
8 -1 -12 6.63 0.72  
-8 -1 12 5.87 0.61  
-8 -1 12 5.88 0.55  
-8 1 12 5.18 0.55  
-8 1 12 6.22 0.59  
8 1 -12 5.29 0.63  
-7 -1 12 9.37 0.64

|    |    |     |       |      |
|----|----|-----|-------|------|
| 7  | -1 | -12 | 11.37 | 0.88 |
| -7 | -1 | 12  | 10.61 | 0.74 |
| -7 | 1  | 12  | 10.62 | 0.68 |
| -7 | 1  | 12  | 9.27  | 0.63 |
| 7  | 1  | -12 | 9.38  | 0.76 |
| -6 | -1 | 12  | 6.83  | 0.60 |
| 6  | -1 | -12 | 6.46  | 0.67 |
| -6 | -1 | 12  | 5.91  | 0.53 |
| -6 | 1  | 12  | 6.70  | 0.56 |
| 6  | 1  | -12 | 5.90  | 0.64 |
| -5 | -1 | 12  | 5.08  | 0.53 |
| -5 | -1 | 12  | 3.82  | 0.45 |
| 5  | -1 | -12 | 3.63  | 0.54 |
| -5 | 1  | 12  | 4.27  | 0.50 |
| 5  | 1  | -12 | 4.82  | 0.60 |
| -5 | 1  | 12  | 4.86  | 0.49 |
| -4 | -1 | 12  | 8.32  | 0.57 |
| -4 | -1 | 12  | 8.07  | 0.62 |
| -4 | -1 | 12  | 10.00 | 0.80 |
| 4  | -1 | -12 | 9.37  | 0.77 |
| 4  | 1  | -12 | 9.74  | 0.54 |
| -4 | 1  | 12  | 9.01  | 0.57 |
| -4 | 1  | 12  | 10.18 | 0.93 |
| 4  | 1  | -12 | 9.31  | 0.73 |
| -3 | -1 | 12  | 19.82 | 0.80 |
| 3  | -1 | -12 | 19.74 | 0.78 |
| 3  | 1  | -12 | 18.84 | 0.78 |
| -3 | 1  | 12  | 21.14 | 0.83 |
| -2 | -1 | 12  | 4.03  | 0.56 |
| 2  | -1 | -12 | 3.45  | 0.42 |
| -2 | -1 | 12  | 3.71  | 0.56 |
| -2 | 1  | 12  | 4.51  | 0.59 |
| 2  | 1  | -12 | 3.82  | 0.43 |
| -2 | 1  | 12  | 3.62  | 0.44 |
| -1 | -1 | 12  | 0.42  | 0.43 |
| -1 | -1 | 12  | 0.15  | 0.28 |
| -1 | -1 | 12  | 0.02  | 0.41 |
| 1  | -1 | -12 | 0.05  | 0.28 |
| 1  | 1  | -12 | 0.60  | 0.27 |
| -1 | 1  | 12  | -0.32 | 0.43 |
| 1  | 1  | -12 | -0.11 | 0.26 |
| 0  | -1 | 12  | 4.78  | 0.63 |
| 0  | -1 | -12 | 3.13  | 0.46 |
| 0  | -1 | 12  | 4.04  | 0.58 |
| 0  | 1  | 12  | 3.42  | 0.60 |
| 0  | 1  | -12 | 3.22  | 0.43 |

|     |    |     |       |      |
|-----|----|-----|-------|------|
| 1   | -1 | 12  | -0.90 | 0.42 |
| 1   | -1 | 12  | 0.24  | 0.42 |
| -1  | -1 | -12 | 1.01  | 0.39 |
| 1   | 1  | 12  | 0.22  | 0.49 |
| -1  | 1  | -12 | 0.43  | 0.34 |
| 2   | -1 | 12  | 4.63  | 0.68 |
| 2   | -1 | 12  | 2.70  | 0.62 |
| -2  | -1 | -12 | 3.32  | 0.55 |
| 2   | 1  | 12  | 4.00  | 0.66 |
| -2  | 1  | -12 | 3.40  | 0.53 |
| 3   | -1 | 12  | 2.16  | 0.61 |
| -3  | -1 | -12 | 2.10  | 0.51 |
| 3   | -1 | 12  | 2.26  | 0.60 |
| 3   | 1  | 12  | 2.71  | 0.65 |
| -3  | 1  | -12 | 2.09  | 0.49 |
| -4  | -1 | -12 | -0.31 | 0.41 |
| 4   | -1 | 12  | -0.27 | 0.45 |
| 4   | -1 | 12  | -0.03 | 0.53 |
| -4  | 1  | -12 | 0.94  | 0.44 |
| 4   | 1  | 12  | 0.11  | 0.58 |
| -5  | -1 | -12 | -0.14 | 0.37 |
| 5   | -1 | 12  | 0.86  | 0.53 |
| -5  | 1  | -12 | 0.08  | 0.46 |
| 5   | 1  | 12  | 0.00  | 0.58 |
| -13 | -2 | 12  | -0.12 | 0.47 |
| 13  | -2 | -12 | -0.38 | 0.53 |
| 13  | -2 | -12 | 0.19  | 0.41 |
| 13  | 2  | -12 | 0.01  | 0.44 |
| -13 | 2  | 12  | 0.08  | 0.48 |
| -12 | -2 | 12  | 0.17  | 0.50 |
| 12  | -2 | -12 | -0.42 | 0.51 |
| -12 | 2  | 12  | -0.17 | 0.45 |
| 12  | 2  | -12 | 0.16  | 0.45 |
| -12 | 2  | 12  | 0.15  | 0.44 |
| 11  | -2 | -12 | -0.40 | 0.50 |
| -11 | -2 | 12  | -0.24 | 0.40 |
| -11 | 2  | 12  | 0.07  | 0.44 |
| -11 | 2  | 12  | 0.09  | 0.40 |
| 11  | 2  | -12 | 0.04  | 0.39 |
| 10  | -2 | -12 | 0.77  | 0.52 |
| -10 | -2 | 12  | 0.77  | 0.47 |
| -10 | 2  | 12  | 1.16  | 0.47 |
| -10 | 2  | 12  | 0.46  | 0.41 |
| 10  | 2  | -12 | 0.83  | 0.41 |
| -9  | -2 | 12  | -0.06 | 0.39 |
| 9   | -2 | -12 | 0.13  | 0.45 |

|    |    |     |       |      |
|----|----|-----|-------|------|
| -9 | 2  | 12  | 0.19  | 0.35 |
| 9  | 2  | -12 | -0.30 | 0.31 |
| -9 | 2  | 12  | 0.51  | 0.35 |
| 9  | 2  | -12 | -0.42 | 0.40 |
| -8 | -2 | 12  | 1.64  | 0.47 |
| 8  | -2 | -12 | 2.01  | 0.56 |
| 8  | 2  | -12 | 2.30  | 0.49 |
| -8 | 2  | 12  | 2.65  | 0.48 |
| -8 | 2  | 12  | 2.01  | 0.42 |
| 8  | 2  | -12 | 1.86  | 0.42 |
| -7 | -2 | 12  | 5.49  | 0.57 |
| 7  | -2 | -12 | 5.77  | 0.70 |
| 7  | 2  | -12 | 4.70  | 0.59 |
| -7 | 2  | 12  | 4.37  | 0.50 |
| -6 | -2 | 12  | 9.75  | 0.71 |
| -6 | -2 | 12  | 8.66  | 0.60 |
| 6  | -2 | -12 | 8.32  | 0.78 |
| -6 | 2  | 12  | 8.99  | 0.61 |
| -6 | 2  | 12  | 9.78  | 0.61 |
| 6  | 2  | -12 | 9.63  | 0.74 |
| -5 | -2 | 12  | 14.20 | 0.71 |
| 5  | -2 | -12 | 15.02 | 0.86 |
| -5 | -2 | 12  | 15.78 | 0.82 |
| -5 | 2  | 12  | 15.65 | 0.73 |
| 5  | 2  | -12 | 15.09 | 0.85 |
| -4 | -2 | 12  | 1.38  | 0.35 |
| -4 | -2 | 12  | 1.05  | 0.36 |
| 4  | -2 | -12 | 1.78  | 0.46 |
| -4 | -2 | 12  | 1.19  | 0.40 |
| 4  | 2  | -12 | 1.02  | 0.39 |
| -4 | 2  | 12  | 1.39  | 0.38 |
| -3 | -2 | 12  | -0.05 | 0.29 |
| 3  | -2 | -12 | 0.36  | 0.27 |
| -3 | -2 | 12  | -0.25 | 0.33 |
| -3 | 2  | 12  | 0.30  | 0.28 |
| -2 | -2 | 12  | 2.21  | 0.43 |
| 2  | -2 | -12 | 1.99  | 0.38 |
| -2 | -2 | 12  | 2.58  | 0.49 |
| -2 | 2  | 12  | 2.61  | 0.53 |
| -2 | 2  | 12  | 2.21  | 0.37 |
| -1 | -2 | 12  | 5.74  | 0.58 |
| 1  | -2 | -12 | 5.18  | 0.53 |
| -1 | -2 | 12  | 5.80  | 0.61 |
| -1 | 2  | 12  | 6.69  | 0.71 |
| -1 | 2  | 12  | 5.21  | 0.44 |
| 1  | 2  | -12 | 5.42  | 0.50 |



|     |    |     |       |      |
|-----|----|-----|-------|------|
| 0   | -2 | 12  | 1.07  | 0.45 |
| 0   | -2 | 12  | 1.05  | 0.42 |
| 0   | -2 | -12 | 1.43  | 0.35 |
| 0   | 2  | -12 | 1.33  | 0.37 |
| 0   | 2  | 12  | 1.26  | 0.50 |
| -1  | -2 | -12 | 1.44  | 0.41 |
| 1   | -2 | 12  | 1.02  | 0.48 |
| -1  | 2  | -12 | 1.62  | 0.38 |
| 1   | 2  | 12  | 1.67  | 0.56 |
| 2   | -2 | 12  | 0.05  | 0.51 |
| 2   | -2 | 12  | -0.14 | 0.45 |
| -2  | -2 | -12 | -0.11 | 0.35 |
| -2  | 2  | -12 | 0.04  | 0.34 |
| 2   | 2  | 12  | -0.10 | 0.51 |
| 3   | -2 | 12  | -0.64 | 0.52 |
| 3   | -2 | 12  | 0.18  | 0.54 |
| -3  | -2 | -12 | 0.41  | 0.40 |
| 3   | 2  | 12  | 0.16  | 0.52 |
| -3  | 2  | -12 | 0.38  | 0.39 |
| 4   | -2 | 12  | 0.58  | 0.54 |
| 4   | -2 | 12  | 0.39  | 0.49 |
| -4  | -2 | -12 | 1.21  | 0.48 |
| -4  | 2  | -12 | 0.76  | 0.41 |
| 4   | 2  | 12  | 1.73  | 0.64 |
| 5   | -2 | 12  | 0.62  | 0.64 |
| 5   | -2 | 12  | 0.12  | 0.51 |
| -5  | -2 | -12 | 0.21  | 0.44 |
| -5  | 2  | -12 | -0.03 | 0.42 |
| 5   | 2  | 12  | 0.14  | 0.58 |
| 13  | -3 | -12 | -0.26 | 0.58 |
| -13 | 3  | 12  | 0.35  | 0.52 |
| -13 | 3  | 12  | 0.04  | 0.44 |
| 13  | 3  | -12 | 0.07  | 0.50 |
| -12 | -3 | 12  | 0.54  | 0.52 |
| 12  | -3 | -12 | 0.35  | 0.55 |
| -12 | 3  | 12  | 0.61  | 0.45 |
| 12  | 3  | -12 | 0.94  | 0.50 |
| -12 | 3  | 12  | 1.05  | 0.49 |
| 11  | -3 | -12 | 0.56  | 0.56 |
| -11 | -3 | 12  | 0.03  | 0.45 |
| -11 | 3  | 12  | 0.52  | 0.43 |
| -11 | 3  | 12  | 0.76  | 0.44 |
| 11  | 3  | -12 | 0.81  | 0.49 |
| 10  | -3 | -12 | -0.60 | 0.46 |
| -10 | -3 | 12  | 0.28  | 0.47 |
| -10 | 3  | 12  | 0.21  | 0.38 |

|     |    |     |       |      |
|-----|----|-----|-------|------|
| -10 | 3  | 12  | 0.35  | 0.40 |
| 10  | 3  | -12 | 0.33  | 0.39 |
| -9  | -3 | 12  | 0.19  | 0.43 |
| 9   | -3 | -12 | -0.01 | 0.49 |
| -9  | 3  | 12  | 0.40  | 0.36 |
| 9   | 3  | -12 | 0.16  | 0.36 |
| -9  | 3  | 12  | -0.21 | 0.35 |
| -8  | -3 | 12  | 0.32  | 0.42 |
| 8   | -3 | -12 | 0.08  | 0.47 |
| -8  | 3  | 12  | 0.20  | 0.33 |
| 8   | 3  | -12 | 0.14  | 0.35 |
| 7   | -3 | -12 | 2.23  | 0.52 |
| -7  | -3 | 12  | 1.50  | 0.43 |
| -7  | 3  | 12  | 1.62  | 0.39 |
| 7   | 3  | -12 | 2.23  | 0.42 |
| -6  | -3 | 12  | 0.32  | 0.39 |
| 6   | -3 | -12 | 0.30  | 0.45 |
| -6  | 3  | 12  | 0.51  | 0.33 |
| 6   | 3  | -12 | 1.22  | 0.36 |
| -5  | -3 | 12  | 9.45  | 0.66 |
| 5   | -3 | -12 | 10.93 | 0.85 |
| -5  | 3  | 12  | 9.77  | 0.61 |
| 5   | 3  | -12 | 9.54  | 0.69 |
| 5   | 3  | -12 | 9.56  | 0.62 |
| -4  | -3 | 12  | 7.56  | 0.55 |
| -4  | -3 | 12  | 8.38  | 0.67 |
| 4   | -3 | -12 | 6.44  | 0.71 |
| 4   | 3  | -12 | 8.19  | 0.66 |
| -4  | 3  | 12  | 7.28  | 0.57 |
| 3   | -3 | -12 | 1.16  | 0.45 |
| -3  | -3 | 12  | 1.10  | 0.36 |
| -3  | -3 | 12  | 0.35  | 0.34 |
| 3   | -3 | -12 | 0.68  | 0.29 |
| -3  | 3  | 12  | 0.77  | 0.29 |
| 3   | 3  | -12 | 1.22  | 0.34 |
| 2   | -3 | -12 | 2.33  | 0.38 |
| -2  | -3 | 12  | 2.32  | 0.44 |
| -2  | 3  | 12  | 3.24  | 0.58 |
| -2  | 3  | 12  | 2.72  | 0.37 |
| 2   | 3  | -12 | 2.32  | 0.37 |
| 1   | -3 | -12 | 5.20  | 0.52 |
| -1  | -3 | 12  | 4.84  | 0.55 |
| 1   | 3  | -12 | 4.42  | 0.49 |
| -1  | 3  | 12  | 4.15  | 0.44 |
| -1  | 3  | 12  | 4.83  | 0.65 |
| 0   | -3 | 12  | 2.12  | 0.48 |

|     |    |     |       |      |
|-----|----|-----|-------|------|
| 0   | -3 | 12  | 2.70  | 0.53 |
| 0   | -3 | -12 | 1.87  | 0.42 |
| 0   | 3  | 12  | 2.89  | 0.57 |
| 0   | 3  | -12 | 2.47  | 0.44 |
| 1   | -3 | 12  | 0.69  | 0.42 |
| -1  | -3 | -12 | 0.21  | 0.34 |
| 1   | -3 | 12  | -0.54 | 0.40 |
| -1  | 3  | -12 | 0.19  | 0.32 |
| 1   | 3  | 12  | 0.25  | 0.50 |
| -2  | -3 | -12 | 2.25  | 0.48 |
| 2   | -3 | 12  | 1.95  | 0.49 |
| 2   | -3 | 12  | 2.44  | 0.59 |
| -2  | 3  | -12 | 2.47  | 0.45 |
| 2   | 3  | 12  | 3.03  | 0.62 |
| 3   | -3 | 12  | 0.65  | 0.52 |
| -3  | -3 | -12 | -0.08 | 0.33 |
| 3   | 3  | 12  | -0.44 | 0.53 |
| 4   | -3 | 12  | -0.18 | 0.47 |
| -4  | -3 | -12 | 0.20  | 0.39 |
| 4   | -3 | 12  | -0.44 | 0.47 |
| 4   | 3  | 12  | 0.22  | 0.55 |
| -4  | 3  | -12 | 0.33  | 0.41 |
| -5  | -3 | -12 | 0.71  | 0.49 |
| 5   | -3 | 12  | 1.33  | 0.55 |
| 5   | -3 | 12  | 1.08  | 0.61 |
| -5  | 3  | -12 | 0.89  | 0.49 |
| 5   | 3  | 12  | 1.80  | 0.67 |
| -13 | 4  | 12  | -0.01 | 0.46 |
| -13 | 4  | 12  | 0.21  | 0.47 |
| 12  | -4 | -12 | -0.75 | 0.54 |
| -12 | -4 | 12  | 0.00  | 0.46 |
| -12 | 4  | 12  | -0.22 | 0.41 |
| 12  | 4  | -12 | 0.25  | 0.45 |
| -12 | 4  | 12  | -0.04 | 0.44 |
| 11  | -4 | -12 | 0.33  | 0.54 |
| -11 | -4 | 12  | 0.28  | 0.53 |
| -11 | 4  | 12  | 0.93  | 0.50 |
| 11  | 4  | -12 | 0.34  | 0.49 |
| -11 | 4  | 12  | 0.34  | 0.43 |
| -10 | -4 | 12  | -0.23 | 0.42 |
| 10  | -4 | -12 | 0.75  | 0.53 |
| -10 | 4  | 12  | 1.24  | 0.48 |
| -10 | 4  | 12  | 0.13  | 0.61 |
| 10  | 4  | -12 | 0.24  | 0.39 |
| -9  | -4 | 12  | 1.79  | 0.49 |
| 9   | -4 | -12 | 1.33  | 0.54 |

|    |    |     |       |      |
|----|----|-----|-------|------|
| -9 | 4  | 12  | 1.95  | 0.48 |
| 9  | 4  | -12 | 2.05  | 0.45 |
| 8  | -4 | -12 | -0.47 | 0.44 |
| -8 | -4 | 12  | 0.45  | 0.43 |
| 8  | 4  | -12 | 0.62  | 0.40 |
| -8 | 4  | 12  | 0.90  | 0.38 |
| 7  | -4 | -12 | 1.52  | 0.55 |
| -7 | -4 | 12  | 1.70  | 0.45 |
| -7 | 4  | 12  | 2.77  | 0.45 |
| 7  | 4  | -12 | 1.47  | 0.41 |
| 6  | -4 | -12 | 5.70  | 0.71 |
| -6 | -4 | 12  | 5.04  | 0.61 |
| 6  | 4  | -12 | 5.28  | 0.53 |
| -6 | 4  | 12  | 4.31  | 0.48 |
| -5 | -4 | 12  | 2.78  | 0.49 |
| 5  | -4 | -12 | 2.13  | 0.53 |
| -5 | 4  | 12  | 1.96  | 0.37 |
| 5  | 4  | -12 | 1.83  | 0.39 |
| 4  | -4 | -12 | 2.22  | 0.53 |
| -4 | -4 | 12  | 1.39  | 0.45 |
| 4  | 4  | -12 | 2.04  | 0.38 |
| -4 | 4  | 12  | 1.88  | 0.39 |
| 3  | -4 | -12 | 10.56 | 0.62 |
| -3 | -4 | 12  | 10.52 | 0.68 |
| -3 | 4  | 12  | 12.65 | 0.77 |
| 3  | -4 | -12 | 10.21 | 0.76 |
| -3 | 4  | 12  | 11.02 | 0.66 |
| 3  | 4  | -12 | 9.93  | 0.62 |
| 2  | -4 | -12 | 3.47  | 0.47 |
| -2 | -4 | 12  | 3.11  | 0.46 |
| -2 | 4  | 12  | 4.81  | 0.65 |
| -2 | 4  | 12  | 4.98  | 0.49 |
| 2  | 4  | -12 | 2.98  | 0.40 |
| 2  | 4  | -12 | 4.07  | 0.51 |
| 1  | -4 | -12 | 0.35  | 0.33 |
| -1 | -4 | 12  | 0.68  | 0.39 |
| -1 | 4  | 12  | 0.53  | 0.46 |
| -1 | 4  | 12  | -0.01 | 0.26 |
| 1  | 4  | -12 | 0.25  | 0.29 |
| 0  | -4 | 12  | 2.94  | 0.53 |
| 0  | -4 | -12 | 3.24  | 0.48 |
| 0  | 4  | 12  | 2.71  | 0.40 |
| 0  | 4  | 12  | 3.64  | 0.61 |
| 0  | 4  | -12 | 3.09  | 0.48 |
| -1 | -4 | -12 | 0.11  | 0.36 |
| 1  | -4 | 12  | 0.88  | 0.41 |

|     |    |     |       |      |
|-----|----|-----|-------|------|
| 1   | 4  | 12  | 0.06  | 0.48 |
| -1  | 4  | -12 | 0.37  | 0.36 |
| -2  | -4 | -12 | 0.29  | 0.38 |
| 2   | -4 | 12  | 0.34  | 0.44 |
| 2   | -4 | 12  | 0.96  | 0.50 |
| 2   | 4  | 12  | 0.70  | 0.54 |
| -2  | 4  | -12 | 0.75  | 0.39 |
| 3   | -4 | 12  | 0.34  | 0.49 |
| -3  | -4 | -12 | 0.29  | 0.36 |
| 3   | -4 | 12  | -0.23 | 0.54 |
| 3   | 4  | 12  | 0.11  | 0.57 |
| -3  | 4  | -12 | -0.50 | 0.33 |
| 4   | -4 | 12  | -0.10 | 0.47 |
| -4  | -4 | -12 | -0.13 | 0.40 |
| 4   | 4  | 12  | 0.46  | 0.58 |
| -4  | 4  | -12 | 0.27  | 0.43 |
| 5   | -4 | 12  | 0.71  | 0.51 |
| -12 | -5 | 12  | 1.11  | 0.56 |
| 12  | -5 | -12 | 1.16  | 0.63 |
| 12  | 5  | -12 | 0.47  | 0.53 |
| -12 | 5  | 12  | 1.37  | 0.56 |
| 11  | -5 | -12 | 0.03  | 0.57 |
| -11 | -5 | 12  | -0.22 | 0.49 |
| 11  | 5  | -12 | 0.63  | 0.48 |
| -11 | 5  | 12  | 0.12  | 0.42 |
| -10 | -5 | 12  | 0.17  | 0.49 |
| 10  | -5 | -12 | 0.02  | 0.55 |
| -10 | 5  | 12  | -0.07 | 0.44 |
| 10  | 5  | -12 | 0.04  | 0.44 |
| -9  | -5 | 12  | 0.11  | 0.44 |
| 9   | -5 | -12 | 0.14  | 0.52 |
| 9   | 5  | -12 | 0.64  | 0.44 |
| -9  | 5  | 12  | 0.56  | 0.45 |
| -8  | -5 | 12  | 1.59  | 0.46 |
| 8   | -5 | -12 | 3.55  | 0.67 |
| 8   | 5  | -12 | 2.65  | 0.48 |
| -8  | 5  | 12  | 3.13  | 0.50 |
| -7  | -5 | 12  | 0.44  | 0.37 |
| 7   | -5 | -12 | -0.30 | 0.42 |
| 7   | 5  | -12 | 0.01  | 0.33 |
| -7  | 5  | 12  | -0.05 | 0.35 |
| 6   | -5 | -12 | 2.21  | 0.58 |
| -6  | -5 | 12  | 1.89  | 0.46 |
| 6   | 5  | -12 | 2.17  | 0.46 |
| -6  | 5  | 12  | 1.75  | 0.42 |
| 5   | -5 | -12 | 3.10  | 0.55 |

|    |    |     |       |      |
|----|----|-----|-------|------|
| -5 | -5 | 12  | 3.15  | 0.50 |
| 5  | 5  | -12 | 3.53  | 0.48 |
| -5 | 5  | 12  | 3.20  | 0.47 |
| -4 | -5 | 12  | 2.66  | 0.49 |
| 4  | -5 | -12 | 4.46  | 0.64 |
| -4 | 5  | 12  | 4.25  | 0.50 |
| 4  | 5  | -12 | 3.59  | 0.45 |
| 3  | -5 | -12 | 0.72  | 0.42 |
| -3 | -5 | 12  | 0.89  | 0.34 |
| -3 | -5 | 12  | 0.51  | 0.40 |
| 3  | -5 | -12 | -0.15 | 0.30 |
| 3  | 5  | -12 | 0.08  | 0.27 |
| -3 | 5  | 12  | -0.38 | 0.28 |
| -2 | -5 | 12  | 5.23  | 0.55 |
| 2  | -5 | -12 | 6.83  | 0.60 |
| 2  | 5  | -12 | 6.07  | 0.59 |
| 2  | 5  | -12 | 5.02  | 0.56 |
| -2 | 5  | 12  | 6.56  | 0.75 |
| -2 | 5  | 12  | 5.68  | 0.51 |
| 1  | -5 | -12 | 2.24  | 0.44 |
| -1 | -5 | 12  | 2.61  | 0.45 |
| -1 | 5  | 12  | 2.02  | 0.39 |
| -1 | 5  | 12  | 1.85  | 0.53 |
| 1  | 5  | -12 | 1.63  | 0.40 |
| 0  | -5 | -12 | 1.16  | 0.41 |
| 0  | -5 | 12  | 2.31  | 0.50 |
| 0  | 5  | 12  | 2.18  | 0.59 |
| 0  | 5  | -12 | 2.54  | 0.49 |
| 0  | 5  | 12  | 2.90  | 0.44 |
| -1 | -5 | -12 | 0.88  | 0.40 |
| 1  | -5 | 12  | 0.91  | 0.46 |
| -1 | 5  | -12 | 0.78  | 0.40 |
| 1  | 5  | 12  | 1.28  | 0.55 |
| -2 | -5 | -12 | 0.16  | 0.43 |
| 2  | -5 | 12  | 0.23  | 0.46 |
| 2  | 5  | 12  | 0.51  | 0.56 |
| -2 | 5  | -12 | 0.58  | 0.40 |
| 3  | -5 | 12  | 0.04  | 0.48 |
| -3 | -5 | -12 | 0.09  | 0.43 |
| 3  | 5  | 12  | 0.94  | 0.60 |
| -3 | 5  | -12 | 0.14  | 0.40 |
| 4  | -5 | 12  | 0.03  | 0.44 |
| -4 | -5 | -12 | -0.22 | 0.45 |
| -4 | 5  | -12 | 0.41  | 0.44 |
| 4  | 5  | 12  | 0.50  | 0.53 |
| -5 | 5  | -12 | -0.47 | 0.41 |

|     |    |     |       |      |
|-----|----|-----|-------|------|
| -12 | 6  | 12  | 0.54  | 0.51 |
| 11  | -6 | -12 | 0.45  | 0.60 |
| -11 | -6 | 12  | 1.03  | 0.53 |
| 11  | 6  | -12 | 0.44  | 0.46 |
| -11 | 6  | 12  | 0.84  | 0.54 |
| -10 | -6 | 12  | -0.60 | 0.46 |
| 10  | -6 | -12 | -0.75 | 0.50 |
| -10 | 6  | 12  | -0.20 | 0.42 |
| 10  | 6  | -12 | 0.03  | 0.41 |
| 9   | -6 | -12 | -0.41 | 0.52 |
| -9  | -6 | 12  | -0.18 | 0.40 |
| 9   | 6  | -12 | 0.39  | 0.40 |
| -9  | 6  | 12  | -0.32 | 0.38 |
| -8  | -6 | 12  | 1.89  | 0.54 |
| 8   | -6 | -12 | 1.85  | 0.61 |
| 8   | 6  | -12 | 1.05  | 0.43 |
| -8  | 6  | 12  | 1.19  | 0.45 |
| 7   | -6 | -12 | 0.63  | 0.53 |
| -7  | -6 | 12  | 0.29  | 0.41 |
| 7   | 6  | -12 | 0.40  | 0.43 |
| -7  | 6  | 12  | 0.42  | 0.36 |
| 6   | -6 | -12 | 1.60  | 0.55 |
| -6  | -6 | 12  | 0.78  | 0.45 |
| 6   | 6  | -12 | 1.15  | 0.39 |
| -6  | 6  | 12  | 1.05  | 0.37 |
| -5  | -6 | 12  | -0.02 | 0.39 |
| 5   | -6 | -12 | -0.71 | 0.41 |
| 5   | 6  | -12 | 0.02  | 0.34 |
| -5  | 6  | 12  | -0.38 | 0.31 |
| -4  | -6 | 12  | 1.89  | 0.50 |
| 4   | -6 | -12 | 2.13  | 0.53 |
| -4  | -6 | 12  | 1.60  | 0.39 |
| 4   | 6  | -12 | 2.36  | 0.45 |
| -4  | 6  | 12  | 2.86  | 0.47 |
| -3  | -6 | 12  | 8.57  | 0.76 |
| 3   | -6 | -12 | 7.00  | 0.72 |
| 3   | -6 | -12 | 7.75  | 0.65 |
| -3  | -6 | 12  | 7.78  | 0.65 |
| -3  | 6  | 12  | 7.77  | 0.63 |
| 3   | 6  | -12 | 7.40  | 0.59 |
| 2   | -6 | -12 | 2.23  | 0.45 |
| -2  | -6 | 12  | 2.21  | 0.46 |
| 2   | 6  | -12 | 1.40  | 0.43 |
| -2  | 6  | 12  | 2.43  | 0.40 |
| -1  | -6 | 12  | 0.37  | 0.39 |
| 1   | -6 | -12 | -0.10 | 0.36 |

-1 6 12 0.33 0.47  
-1 6 12 1.03 0.33  
1 6 -12 0.46 0.36  
0 -6 -12 0.11 0.33  
0 -6 12 0.16 0.37  
0 6 12 0.22 0.49  
0 6 12 0.44 0.33  
0 6 -12 0.27 0.37  
1 -6 12 -0.11 0.38  
-1 -6 -12 0.27 0.39  
1 6 12 -0.18 0.51  
1 6 12 0.16 0.49  
-1 6 -12 0.04 0.37  
-2 -6 -12 0.84 0.46  
2 -6 12 0.61 0.48  
2 6 12 -0.08 0.52  
-2 6 -12 0.24 0.35  
3 -6 12 0.87 0.47  
-3 -6 -12 1.00 0.51  
-3 6 -12 0.04 0.38  
3 6 12 0.38 0.55  
4 -6 12 -0.06 0.46  
-4 -6 -12 -0.66 0.37  
4 6 12 0.67 0.62  
-4 6 -12 -0.09 0.41  
-5 6 -12 0.09 0.47  
-11 -7 12 0.21 0.49  
11 -7 -12 -0.46 0.57  
11 7 -12 -0.12 0.45  
-11 7 12 0.69 0.47  
10 -7 -12 1.15 0.65  
-10 -7 12 1.55 0.57  
10 7 -12 1.20 0.50  
-10 7 12 1.54 0.53  
9 -7 -12 -0.42 0.54  
-9 -7 12 0.29 0.48  
-9 7 12 -0.57 0.40  
9 7 -12 -0.14 0.40  
8 -7 -12 0.07 0.51  
-8 -7 12 0.62 0.45  
8 7 -12 -0.83 0.36  
-8 7 12 0.27 0.40  
7 -7 -12 0.22 0.51  
-7 -7 12 0.51 0.48  
7 7 -12 -0.06 0.38  
-7 7 12 0.30 0.37



|    |    |     |       |      |
|----|----|-----|-------|------|
| 6  | -7 | -12 | 0.84  | 0.54 |
| -6 | -7 | 12  | 1.20  | 0.50 |
| -6 | 7  | 12  | 1.43  | 0.41 |
| 6  | 7  | -12 | 0.28  | 0.38 |
| 5  | -7 | -12 | 2.21  | 0.55 |
| -5 | -7 | 12  | 3.70  | 0.60 |
| -5 | 7  | 12  | 3.19  | 0.51 |
| 5  | 7  | -12 | 2.39  | 0.45 |
| -4 | -7 | 12  | 1.00  | 0.38 |
| 4  | -7 | -12 | 0.90  | 0.50 |
| -4 | -7 | 12  | 1.27  | 0.50 |
| -4 | 7  | 12  | 0.69  | 0.39 |
| 4  | 7  | -12 | 1.60  | 0.38 |
| 3  | -7 | -12 | 0.06  | 0.43 |
| -3 | -7 | 12  | -0.27 | 0.37 |
| -3 | -7 | 12  | 0.13  | 0.34 |
| -3 | 7  | 12  | -0.08 | 0.29 |
| 3  | 7  | -12 | -0.41 | 0.32 |
| 2  | -7 | -12 | 2.46  | 0.50 |
| 2  | -7 | -12 | 3.22  | 0.61 |
| -2 | -7 | 12  | 2.62  | 0.50 |
| -2 | 7  | 12  | 2.59  | 0.41 |
| 2  | 7  | -12 | 2.45  | 0.52 |
| -1 | -7 | 12  | 0.38  | 0.42 |
| 1  | -7 | -12 | -0.49 | 0.35 |
| 1  | 7  | -12 | 0.47  | 0.35 |
| -1 | 7  | 12  | 0.57  | 0.51 |
| -1 | 7  | 12  | 0.33  | 0.30 |
| 0  | -7 | -12 | 0.25  | 0.40 |
| 0  | -7 | 12  | -0.37 | 0.40 |
| 0  | 7  | 12  | 0.45  | 0.33 |
| 0  | 7  | -12 | 0.00  | 0.40 |
| 0  | 7  | 12  | -0.18 | 0.50 |
| -1 | -7 | -12 | 0.14  | 0.43 |
| 1  | -7 | 12  | 0.25  | 0.46 |
| 1  | 7  | 12  | 0.22  | 0.53 |
| 1  | 7  | 12  | 0.60  | 0.36 |
| -1 | 7  | -12 | 0.49  | 0.44 |
| -2 | -7 | -12 | 0.49  | 0.48 |
| 2  | -7 | 12  | 0.14  | 0.48 |
| -2 | 7  | -12 | -0.04 | 0.41 |
| 2  | 7  | 12  | 0.18  | 0.55 |
| -3 | -7 | -12 | -0.19 | 0.41 |
| 3  | -7 | 12  | 0.05  | 0.44 |
| 3  | 7  | 12  | 0.46  | 0.57 |
| -3 | 7  | -12 | 0.44  | 0.42 |

-4 7 -12 0.42 0.47  
-11 8 12 0.07 0.51  
10 -8 -12 -0.61 0.58  
-10 -8 12 0.42 0.53  
10 8 -12 0.34 0.47  
-10 8 12 0.94 0.50  
-9 -8 12 0.93 0.54  
9 -8 -12 -0.28 0.57  
-9 8 12 0.93 0.47  
9 8 -12 0.43 0.51  
-8 -8 12 0.71 0.51  
8 -8 -12 0.10 0.56  
8 8 -12 -0.94 0.38  
-8 8 12 0.30 0.41  
-7 -8 12 -0.02 0.48  
7 -8 -12 0.03 0.55  
-7 8 12 0.07 0.45  
7 8 -12 0.28 0.47  
6 -8 -12 0.02 0.52  
-6 -8 12 0.66 0.48  
6 8 -12 -0.15 0.37  
-6 8 12 -0.24 0.41  
-5 -8 12 0.77 0.48  
5 -8 -12 0.63 0.47  
-5 8 12 1.28 0.43  
5 8 -12 1.09 0.44  
4 -8 -12 -0.12 0.47  
-4 -8 12 -0.12 0.44  
-4 -8 12 -0.21 0.36  
4 8 -12 -0.21 0.37  
-4 8 12 0.21 0.35  
-3 -8 12 0.43 0.40  
3 -8 -12 0.86 0.54  
-3 8 12 0.97 0.38  
-2 -8 12 0.40 0.43  
2 -8 -12 1.34 0.55  
2 -8 -12 0.23 0.43  
2 8 -12 0.56 0.45  
-2 8 12 0.24 0.36  
-1 -8 12 0.38 0.45  
1 -8 -12 -1.00 0.39  
1 8 -12 0.01 0.36  
-1 8 12 -0.14 0.32  
0 -8 12 0.20 0.46  
0 -8 -12 -0.20 0.45  
0 8 12 0.67 0.38

|     |    |     |       |      |
|-----|----|-----|-------|------|
| 0   | 8  | -12 | 0.27  | 0.43 |
| 0   | 8  | 12  | -0.27 | 0.49 |
| -1  | -8 | -12 | -0.02 | 0.48 |
| 1   | -8 | 12  | 0.32  | 0.43 |
| 1   | 8  | 12  | 0.52  | 0.56 |
| -1  | 8  | -12 | 0.61  | 0.46 |
| 1   | 8  | 12  | 1.50  | 0.42 |
| -2  | -8 | -12 | 0.06  | 0.50 |
| 2   | -8 | 12  | 0.07  | 0.46 |
| -2  | 8  | -12 | 0.32  | 0.46 |
| 2   | 8  | 12  | 0.48  | 0.55 |
| -3  | -8 | -12 | -0.57 | 0.53 |
| 3   | 8  | 12  | 0.10  | 0.94 |
| -3  | 8  | -12 | 0.75  | 0.47 |
| -10 | 9  | 12  | 0.29  | 0.71 |
| -9  | -9 | 12  | 0.81  | 0.56 |
| 9   | -9 | -12 | -0.26 | 0.58 |
| -9  | 9  | 12  | 0.42  | 0.48 |
| 9   | 9  | -12 | 0.64  | 0.49 |
| -8  | -9 | 12  | 0.56  | 0.53 |
| 8   | -9 | -12 | 0.30  | 0.55 |
| -8  | 9  | 12  | 0.72  | 0.47 |
| 8   | 9  | -12 | -0.03 | 0.44 |
| -7  | -9 | 12  | -0.44 | 0.45 |
| 7   | -9 | -12 | -0.11 | 0.57 |
| 7   | 9  | -12 | -0.34 | 0.38 |
| -7  | 9  | 12  | 0.06  | 0.43 |
| -6  | -9 | 12  | -0.01 | 0.48 |
| 6   | -9 | -12 | -0.42 | 0.54 |
| -6  | 9  | 12  | -0.07 | 0.38 |
| 6   | 9  | -12 | -0.22 | 0.45 |
| -5  | -9 | 12  | 0.31  | 0.43 |
| 5   | -9 | -12 | -0.16 | 0.54 |
| -5  | 9  | 12  | -0.11 | 0.44 |
| 5   | 9  | -12 | -0.03 | 0.42 |
| -4  | -9 | 12  | 0.21  | 0.40 |
| 4   | -9 | -12 | -0.07 | 0.49 |
| -4  | 9  | 12  | 0.32  | 0.49 |
| -4  | 9  | 12  | 0.06  | 0.38 |
| 4   | 9  | -12 | 0.44  | 0.43 |
| -3  | -9 | 12  | 0.56  | 0.43 |
| 3   | -9 | -12 | 0.10  | 0.49 |
| 3   | 9  | -12 | 0.20  | 0.39 |
| -3  | 9  | 12  | 0.47  | 0.42 |
| 2   | -9 | -12 | 0.15  | 0.45 |
| -2  | -9 | 12  | 0.35  | 0.44 |

|    |     |     |       |      |
|----|-----|-----|-------|------|
| 2  | -9  | -12 | -0.68 | 0.45 |
| -2 | 9   | 12  | 0.16  | 0.34 |
| 2  | 9   | -12 | -0.04 | 0.43 |
| 1  | -9  | -12 | 0.23  | 0.48 |
| -1 | -9  | 12  | 0.55  | 0.47 |
| 1  | -9  | -12 | -0.50 | 0.44 |
| -1 | 9   | 12  | 0.06  | 0.35 |
| 1  | 9   | -12 | 0.07  | 0.43 |
| 0  | -9  | -12 | 0.15  | 0.49 |
| 0  | -9  | 12  | 0.90  | 0.52 |
| 0  | 9   | 12  | 0.28  | 0.33 |
| 0  | 9   | -12 | 0.35  | 0.47 |
| -1 | -9  | -12 | -0.20 | 0.50 |
| 1  | -9  | 12  | 0.47  | 0.50 |
| 1  | 9   | 12  | 0.54  | 0.40 |
| 1  | 9   | 12  | -0.14 | 0.56 |
| -1 | 9   | -12 | 0.66  | 0.43 |
| -2 | -9  | -12 | 0.23  | 0.51 |
| 2  | 9   | 12  | -0.12 | 0.57 |
| -2 | 9   | -12 | 0.28  | 0.46 |
| 8  | -10 | -12 | 0.01  | 0.62 |
| -8 | -10 | 12  | 0.02  | 0.53 |
| -8 | 10  | 12  | -0.18 | 0.50 |
| 8  | 10  | -12 | -0.41 | 0.52 |
| -7 | -10 | 12  | 0.99  | 0.53 |
| 7  | -10 | -12 | -0.15 | 0.60 |
| -7 | 10  | 12  | 0.43  | 0.46 |
| 7  | 10  | -12 | 0.18  | 0.51 |
| -6 | -10 | 12  | 0.04  | 0.43 |
| 6  | -10 | -12 | -0.02 | 0.59 |
| 6  | 10  | -12 | -0.34 | 0.39 |
| -6 | 10  | 12  | -0.42 | 0.43 |
| -5 | -10 | 12  | 0.36  | 0.52 |
| 5  | -10 | -12 | 0.36  | 0.58 |
| 5  | 10  | -12 | 0.49  | 0.43 |
| -5 | 10  | 12  | 0.58  | 0.46 |
| -4 | -10 | 12  | 0.47  | 0.43 |
| 4  | -10 | -12 | 0.15  | 0.54 |
| -4 | 10  | 12  | 0.27  | 0.42 |
| 4  | 10  | -12 | 0.46  | 0.48 |
| -3 | -10 | 12  | 0.96  | 0.48 |
| 3  | -10 | -12 | 1.84  | 0.63 |
| 3  | 10  | -12 | 1.00  | 0.49 |
| -3 | 10  | 12  | 0.19  | 0.39 |
| 2  | -10 | -12 | 0.47  | 0.53 |
| -2 | -10 | 12  | 1.14  | 0.49 |

|     |     |     |       |      |
|-----|-----|-----|-------|------|
| 2   | 10  | -12 | 0.87  | 0.45 |
| -2  | 10  | 12  | 0.65  | 0.44 |
| -1  | -10 | 12  | 1.17  | 0.48 |
| 1   | -10 | -12 | -0.26 | 0.50 |
| 1   | -10 | -12 | 1.31  | 0.56 |
| 1   | 10  | -12 | 0.47  | 0.51 |
| -1  | 10  | 12  | 1.47  | 0.46 |
| 0   | -10 | 12  | -0.14 | 0.48 |
| 0   | -10 | -12 | 0.81  | 0.52 |
| 0   | -10 | -12 | -0.52 | 0.51 |
| 0   | 10  | -12 | -0.15 | 0.40 |
| 0   | 10  | 12  | 0.09  | 0.40 |
| -1  | -10 | -12 | -0.63 | 0.44 |
| 1   | 10  | 12  | -0.47 | 0.60 |
| 1   | 10  | 12  | 0.19  | 0.39 |
| 7   | 11  | -12 | 0.39  | 0.56 |
| -6  | -11 | 12  | -0.02 | 0.49 |
| 6   | -11 | -12 | -0.08 | 0.63 |
| 6   | 11  | -12 | 0.24  | 0.53 |
| -6  | 11  | 12  | 0.68  | 0.65 |
| 5   | -11 | -12 | 1.18  | 0.68 |
| -5  | -11 | 12  | -0.04 | 0.51 |
| -5  | 11  | 12  | 0.76  | 0.57 |
| 5   | 11  | -12 | -0.13 | 0.50 |
| -4  | -11 | 12  | 0.24  | 0.45 |
| 4   | -11 | -12 | 1.09  | 0.64 |
| -4  | 11  | 12  | 0.42  | 0.45 |
| 4   | 11  | -12 | 0.95  | 0.53 |
| -3  | -11 | 12  | 0.50  | 0.49 |
| 3   | -11 | -12 | -0.09 | 0.56 |
| -3  | 11  | 12  | 0.05  | 0.42 |
| 3   | 11  | -12 | 0.05  | 0.41 |
| -2  | -11 | 12  | 1.41  | 0.54 |
| 2   | -11 | -12 | 1.56  | 0.63 |
| -2  | 11  | 12  | 0.68  | 0.47 |
| 2   | 11  | -12 | 0.17  | 0.53 |
| 1   | -11 | -12 | 0.09  | 0.59 |
| 1   | -11 | -12 | 1.62  | 0.63 |
| -1  | -11 | 12  | 0.95  | 0.55 |
| -1  | 11  | 12  | 0.83  | 0.42 |
| 0   | -11 | -12 | -0.43 | 0.52 |
| 0   | 11  | 12  | -0.31 | 0.41 |
| 5   | 12  | -12 | 0.16  | 0.51 |
| -4  | -12 | 12  | 1.58  | 0.55 |
| -3  | -12 | 12  | 0.34  | 0.53 |
| -13 | 0   | 13  | 0.49  | 0.55 |

|     |        |       |      |
|-----|--------|-------|------|
| 12  | 0 -13  | 0.86  | 0.46 |
| 12  | 0 -13  | -1.09 | 0.46 |
| -12 | 0 13   | 0.40  | 0.44 |
| 11  | 0 -13  | 0.64  | 0.43 |
| -11 | 0 13   | -0.09 | 0.45 |
| 11  | 0 -13  | -0.16 | 0.52 |
| -10 | 0 13   | 0.45  | 0.45 |
| -10 | 0 13   | 0.65  | 0.40 |
| 10  | 0 -13  | 0.29  | 0.48 |
| -9  | 0 13   | -0.41 | 0.38 |
| 9   | 0 -13  | -0.11 | 0.43 |
| -9  | 0 13   | 0.38  | 0.40 |
| 8   | 0 -13  | 1.55  | 0.52 |
| -8  | 0 13   | 1.12  | 0.43 |
| -8  | 0 13   | 1.23  | 0.40 |
| 7   | 0 -13  | 0.30  | 0.45 |
| -7  | 0 13   | 1.45  | 0.39 |
| -7  | 0 13   | 0.53  | 0.38 |
| -6  | 0 13   | -0.03 | 0.57 |
| -6  | 0 13   | 0.29  | 0.31 |
| 6   | 0 -13  | 0.20  | 0.44 |
| -5  | 0 13   | -0.02 | 0.34 |
| 5   | 0 -13  | 0.20  | 0.38 |
| -4  | 0 13   | 0.17  | 0.30 |
| 4   | 0 -13  | -0.24 | 0.36 |
| 3   | 0 -13  | 0.74  | 0.30 |
| -3  | 0 13   | 1.16  | 0.36 |
| -2  | 0 13   | 0.61  | 0.38 |
| -2  | 0 13   | 0.17  | 0.42 |
| 2   | 0 -13  | 0.10  | 0.29 |
| -2  | 0 13   | -0.57 | 0.43 |
| 1   | 0 -13  | 0.52  | 0.34 |
| -1  | 0 13   | 0.38  | 0.46 |
| -1  | 0 13   | 0.15  | 0.40 |
| 0   | 0 13   | -0.06 | 0.44 |
| 0   | 0 -13  | 0.33  | 0.35 |
| 0   | 0 13   | 0.30  | 0.48 |
| 1   | 0 13   | -0.48 | 0.51 |
| -1  | 0 -13  | -0.32 | 0.32 |
| -2  | 0 -13  | 1.05  | 0.47 |
| 2   | 0 13   | 2.58  | 0.67 |
| 3   | 0 13   | 0.88  | 0.61 |
| -3  | 0 -13  | 0.35  | 0.45 |
| 4   | 0 13   | 0.07  | 0.65 |
| -4  | 0 -13  | 0.39  | 0.47 |
| 13  | -1 -13 | -0.55 | 0.54 |

|     |    |     |       |      |
|-----|----|-----|-------|------|
| -13 | 1  | 13  | 0.39  | 0.50 |
| 12  | -1 | -13 | 0.85  | 0.51 |
| -12 | -1 | 13  | -0.27 | 0.48 |
| 12  | -1 | -13 | 0.02  | 0.52 |
| 12  | 1  | -13 | 0.28  | 0.44 |
| -12 | 1  | 13  | -0.42 | 0.44 |
| 11  | -1 | -13 | -0.51 | 0.51 |
| -11 | -1 | 13  | 0.44  | 0.43 |
| -11 | 1  | 13  | 0.15  | 0.42 |
| -11 | 1  | 13  | -0.18 | 0.44 |
| 11  | 1  | -13 | 0.43  | 0.46 |
| 10  | -1 | -13 | -0.23 | 0.49 |
| -10 | -1 | 13  | 0.34  | 0.41 |
| 10  | 1  | -13 | -0.27 | 0.47 |
| 10  | 1  | -13 | 0.68  | 0.45 |
| -10 | 1  | 13  | -0.01 | 0.43 |
| -10 | 1  | 13  | 0.11  | 0.44 |
| -9  | -1 | 13  | 0.46  | 0.43 |
| 9   | -1 | -13 | -0.05 | 0.49 |
| 9   | 1  | -13 | -0.04 | 0.44 |
| -9  | 1  | 13  | 0.36  | 0.38 |
| -9  | 1  | 13  | 0.31  | 0.39 |
| -8  | -1 | 13  | 0.92  | 0.43 |
| 8   | -1 | -13 | 1.46  | 0.55 |
| -8  | -1 | 13  | 1.07  | 0.42 |
| -8  | 1  | 13  | 1.30  | 0.40 |
| -8  | 1  | 13  | 0.90  | 0.40 |
| 8   | 1  | -13 | 1.80  | 0.52 |
| 7   | -1 | -13 | 0.38  | 0.45 |
| -7  | -1 | 13  | 0.64  | 0.40 |
| -7  | -1 | 13  | 0.35  | 0.35 |
| 7   | 1  | -13 | -0.14 | 0.42 |
| -7  | 1  | 13  | 0.21  | 0.38 |
| -6  | -1 | 13  | 0.07  | 0.32 |
| 6   | -1 | -13 | 0.40  | 0.44 |
| -6  | -1 | 13  | 0.34  | 0.36 |
| 6   | 1  | -13 | -0.37 | 0.41 |
| -6  | 1  | 13  | 0.49  | 0.38 |
| 5   | -1 | -13 | 0.79  | 0.42 |
| -5  | -1 | 13  | -0.49 | 0.34 |
| -5  | -1 | 13  | -0.13 | 0.33 |
| 5   | 1  | -13 | -0.27 | 0.39 |
| -5  | 1  | 13  | -0.48 | 0.29 |
| -4  | -1 | 13  | 0.21  | 0.34 |
| 4   | -1 | -13 | 0.96  | 0.44 |
| 4   | 1  | -13 | 0.38  | 0.39 |

-4 1 13 0.31 0.32  
3 -1 -13 -0.11 0.28  
-3 -1 13 0.12 0.31  
-3 1 13 -0.01 0.29  
3 1 -13 0.27 0.28  
-2 -1 13 -0.46 0.40  
-2 -1 13 0.03 0.42  
2 -1 -13 -0.20 0.28  
-2 1 13 0.39 0.31  
2 1 -13 0.32 0.30  
-2 1 13 -0.14 0.46  
1 -1 -13 2.41 0.44  
-1 -1 13 2.59 0.51  
-1 -1 13 2.22 0.56  
1 1 -13 2.68 0.45  
-1 1 13 3.39 0.63  
0 -1 13 1.13 0.48  
0 -1 -13 0.82 0.35  
0 -1 13 1.06 0.53  
0 1 -13 0.73 0.36  
0 1 13 1.38 0.55  
1 -1 13 4.01 0.67  
-1 -1 -13 2.84 0.50  
1 -1 13 2.55 0.58  
-1 1 -13 3.94 0.55  
1 1 13 3.72 0.67  
2 -1 13 0.74 0.54  
2 -1 13 0.70 0.57  
-2 -1 -13 0.02 0.37  
2 1 13 -0.16 0.54  
-2 1 -13 0.13 0.40  
-3 -1 -13 0.34 0.44  
3 -1 13 0.65 0.60  
3 -1 13 -0.12 0.61  
-3 1 -13 0.49 0.43  
3 1 13 0.40 0.60  
4 -1 13 0.18 0.64  
-4 -1 -13 0.10 0.41  
-4 1 -13 0.36 0.46  
4 1 13 0.91 0.64  
13 -2 -13 0.51 0.63  
-13 2 13 0.01 0.48  
12 -2 -13 -0.08 0.57  
-12 -2 13 0.63 0.47  
12 2 -13 -0.22 0.41  
-12 2 13 -0.14 0.44



-12 2 13 -0.02 0.43  
11 -2 -13 0.20 0.53  
-11 -2 13 0.41 0.51  
-11 2 13 0.06 0.45  
11 2 -13 -0.08 0.40  
-11 2 13 0.54 0.46  
10 -2 -13 0.77 0.53  
-10 -2 13 1.20 0.52  
-10 2 13 1.16 0.46  
-10 2 13 0.95 0.45  
10 2 -13 0.31 0.42  
9 -2 -13 1.39 0.56  
-9 -2 13 0.42 0.46  
9 2 -13 1.10 0.42  
-9 2 13 1.42 0.47  
-9 2 13 1.72 0.47  
8 -2 -13 0.04 0.49  
-8 -2 13 0.38 0.41  
8 2 -13 0.29 0.36  
-8 2 13 0.63 0.37  
7 -2 -13 0.30 0.47  
-7 -2 13 0.19 0.38  
7 2 -13 0.31 0.43  
7 2 -13 0.62 0.36  
-7 2 13 -0.02 0.31  
-6 -2 13 0.14 0.39  
6 -2 -13 0.89 0.47  
-6 2 13 0.74 0.35  
6 2 -13 0.45 0.44  
-5 -2 13 0.34 0.39  
-5 -2 13 -0.20 0.33  
5 -2 -13 -0.34 0.38  
5 2 -13 0.15 0.42  
-5 2 13 0.48 0.33  
-4 -2 13 0.75 0.39  
4 -2 -13 0.18 0.40  
-4 -2 13 -0.05 0.33  
4 2 -13 0.91 0.40  
-4 2 13 0.65 0.32  
-3 -2 13 0.31 0.33  
3 -2 -13 0.38 0.29  
-3 -2 13 0.47 0.37  
-3 2 13 0.37 0.34  
2 -2 -13 1.09 0.34  
-2 -2 13 1.73 0.51  
2 2 -13 0.73 0.35

|     |    |     |       |      |
|-----|----|-----|-------|------|
| -2  | 2  | 13  | 0.84  | 0.51 |
| -2  | 2  | 13  | 1.62  | 0.39 |
| -1  | -2 | 13  | 6.13  | 0.67 |
| 1   | -2 | -13 | 4.76  | 0.54 |
| -1  | 2  | 13  | 5.72  | 0.73 |
| 1   | 2  | -13 | 4.88  | 0.50 |
| 0   | -2 | 13  | 2.61  | 0.56 |
| 0   | -2 | -13 | 1.56  | 0.42 |
| 0   | -2 | 13  | 3.08  | 0.60 |
| 0   | 2  | 13  | 2.45  | 0.60 |
| 0   | 2  | -13 | 3.11  | 0.48 |
| 1   | -2 | 13  | 2.44  | 0.60 |
| -1  | -2 | -13 | 2.18  | 0.49 |
| 1   | -2 | 13  | 1.62  | 0.54 |
| -1  | 2  | -13 | 2.74  | 0.49 |
| 1   | 2  | 13  | 2.70  | 0.65 |
| -2  | -2 | -13 | 2.18  | 0.52 |
| 2   | -2 | 13  | 3.32  | 0.71 |
| 2   | -2 | 13  | 3.24  | 0.66 |
| -2  | 2  | -13 | 2.65  | 0.51 |
| 2   | 2  | 13  | 2.19  | 0.66 |
| 3   | -2 | 13  | 0.82  | 0.60 |
| -3  | -2 | -13 | 0.41  | 0.42 |
| 3   | -2 | 13  | 0.65  | 0.63 |
| -3  | 2  | -13 | 0.96  | 0.46 |
| 3   | 2  | 13  | 0.27  | 0.62 |
| 4   | -2 | 13  | 0.03  | 0.64 |
| -4  | -2 | -13 | 0.78  | 0.48 |
| 4   | -2 | 13  | 1.08  | 0.65 |
| 4   | 2  | 13  | 1.08  | 0.66 |
| -4  | 2  | -13 | 1.05  | 0.48 |
| -13 | 3  | 13  | -0.44 | 0.45 |
| -12 | -3 | 13  | 0.53  | 0.55 |
| 12  | -3 | -13 | -0.98 | 0.56 |
| -12 | 3  | 13  | 0.60  | 0.49 |
| -12 | 3  | 13  | -0.14 | 0.43 |
| 12  | 3  | -13 | -0.30 | 0.42 |
| 11  | -3 | -13 | -0.28 | 0.54 |
| -11 | -3 | 13  | 0.37  | 0.52 |
| -11 | 3  | 13  | 0.08  | 0.43 |
| 11  | 3  | -13 | 0.05  | 0.45 |
| -11 | 3  | 13  | 0.46  | 0.44 |
| 10  | -3 | -13 | 0.59  | 0.54 |
| -10 | -3 | 13  | -0.21 | 0.48 |
| -10 | 3  | 13  | 0.10  | 0.40 |
| 10  | 3  | -13 | -0.41 | 0.37 |

|    |    |     |       |      |
|----|----|-----|-------|------|
| -9 | -3 | 13  | 1.31  | 0.51 |
| 9  | -3 | -13 | 0.70  | 0.53 |
| 9  | 3  | -13 | 1.39  | 0.48 |
| -9 | 3  | 13  | 2.40  | 0.49 |
| -8 | -3 | 13  | 1.12  | 0.48 |
| 8  | -3 | -13 | 0.95  | 0.52 |
| 8  | 3  | -13 | 0.64  | 0.40 |
| -8 | 3  | 13  | 1.19  | 0.42 |
| 7  | -3 | -13 | 1.47  | 0.54 |
| -7 | -3 | 13  | 1.22  | 0.46 |
| -7 | 3  | 13  | 1.59  | 0.40 |
| 7  | 3  | -13 | 1.34  | 0.44 |
| 6  | -3 | -13 | 0.35  | 0.48 |
| -6 | -3 | 13  | 0.63  | 0.41 |
| 6  | 3  | -13 | 0.23  | 0.37 |
| -6 | 3  | 13  | 0.66  | 0.35 |
| -5 | -3 | 13  | 0.73  | 0.40 |
| 5  | -3 | -13 | 0.37  | 0.42 |
| -5 | 3  | 13  | 0.68  | 0.34 |
| 5  | 3  | -13 | 0.06  | 0.30 |
| 4  | -3 | -13 | 1.06  | 0.46 |
| -4 | -3 | 13  | 0.59  | 0.40 |
| 4  | 3  | -13 | 1.24  | 0.34 |
| -4 | 3  | 13  | 0.78  | 0.35 |
| 3  | -3 | -13 | 3.53  | 0.59 |
| -3 | -3 | 13  | 2.47  | 0.44 |
| -3 | -3 | 13  | 2.86  | 0.50 |
| 3  | -3 | -13 | 1.57  | 0.38 |
| -3 | 3  | 13  | 2.00  | 0.40 |
| 3  | 3  | -13 | 3.48  | 0.45 |
| -2 | -3 | 13  | -0.69 | 0.31 |
| 2  | -3 | -13 | 0.07  | 0.29 |
| -2 | 3  | 13  | 0.15  | 0.48 |
| -2 | 3  | 13  | 0.11  | 0.31 |
| 2  | 3  | -13 | 0.25  | 0.33 |
| -1 | -3 | 13  | 0.56  | 0.41 |
| 1  | -3 | -13 | 0.13  | 0.32 |
| 1  | 3  | -13 | 0.56  | 0.35 |
| -1 | 3  | 13  | 1.53  | 0.33 |
| -1 | 3  | 13  | 1.09  | 0.52 |
| 0  | -3 | -13 | 2.40  | 0.46 |
| 0  | -3 | 13  | 4.07  | 0.62 |
| 0  | -3 | 13  | 2.78  | 0.53 |
| 0  | 3  | 13  | 3.61  | 0.66 |
| 0  | 3  | -13 | 2.97  | 0.48 |
| 1  | -3 | 13  | 2.95  | 0.59 |

|     |    |     |       |      |
|-----|----|-----|-------|------|
| -1  | -3 | -13 | 1.98  | 0.48 |
| 1   | -3 | 13  | 3.30  | 0.59 |
| -1  | 3  | -13 | 2.06  | 0.67 |
| 1   | 3  | 13  | 2.50  | 0.64 |
| -2  | -3 | -13 | 1.62  | 0.49 |
| 2   | -3 | 13  | 3.66  | 0.67 |
| 2   | 3  | 13  | 1.39  | 0.63 |
| 3   | -3 | 13  | 0.78  | 0.63 |
| 3   | -3 | 13  | -0.17 | 0.58 |
| -3  | -3 | -13 | 0.30  | 0.43 |
| 3   | 3  | 13  | -0.04 | 0.61 |
| -3  | 3  | -13 | 0.34  | 0.39 |
| 4   | -3 | 13  | 0.08  | 0.63 |
| 4   | -3 | 13  | 0.25  | 0.61 |
| -4  | -3 | -13 | -0.17 | 0.48 |
| 4   | 3  | 13  | 0.39  | 0.94 |
| -4  | 3  | -13 | -0.19 | 0.62 |
| 12  | -4 | -13 | 0.14  | 0.60 |
| -12 | -4 | 13  | 0.29  | 0.57 |
| -12 | 4  | 13  | 0.13  | 0.50 |
| 11  | -4 | -13 | -0.92 | 0.52 |
| -11 | -4 | 13  | 0.74  | 0.55 |
| -11 | 4  | 13  | 0.01  | 0.42 |
| 11  | 4  | -13 | 0.09  | 0.43 |
| 10  | -4 | -13 | 0.62  | 0.59 |
| -10 | -4 | 13  | 0.39  | 0.51 |
| 10  | 4  | -13 | 0.94  | 0.47 |
| -10 | 4  | 13  | 0.44  | 0.49 |
| 9   | -4 | -13 | -0.85 | 0.50 |
| -9  | -4 | 13  | -0.46 | 0.44 |
| -9  | 4  | 13  | 0.32  | 0.41 |
| 9   | 4  | -13 | -0.43 | 0.36 |
| 8   | -4 | -13 | -0.15 | 0.49 |
| -8  | -4 | 13  | 0.04  | 0.46 |
| -8  | 4  | 13  | 0.29  | 0.43 |
| 8   | 4  | -13 | -0.23 | 0.35 |
| 7   | -4 | -13 | 1.05  | 0.54 |
| -7  | -4 | 13  | 1.58  | 0.49 |
| -7  | 4  | 13  | 1.65  | 0.43 |
| 7   | 4  | -13 | 1.85  | 0.44 |
| -6  | -4 | 13  | 0.17  | 0.35 |
| 6   | -4 | -13 | 0.18  | 0.47 |
| -6  | 4  | 13  | 0.82  | 0.37 |
| 6   | 4  | -13 | 1.06  | 0.42 |
| 5   | -4 | -13 | 0.23  | 0.40 |
| -5  | -4 | 13  | -0.14 | 0.39 |

-5 4 13 0.21 0.33  
5 4 -13 0.23 0.32  
4 -4 -13 2.54 0.53  
-4 -4 13 2.16 0.49  
4 4 -13 2.25 0.43  
-4 4 13 2.42 0.40  
-3 -4 13 3.28 0.49  
-3 -4 13 2.81 0.50  
3 -4 -13 4.60 0.67  
-3 4 13 3.31 0.45  
3 4 -13 4.37 0.49  
2 -4 -13 0.51 0.33  
-2 -4 13 0.32 0.36  
-2 4 13 0.64 0.52  
-2 4 13 0.30 0.29  
2 4 -13 0.86 0.38  
-1 -4 13 0.39 0.38  
1 -4 -13 0.34 0.34  
1 4 -13 0.15 0.33  
-1 4 13 0.27 0.33  
-1 4 13 1.17 0.49  
0 -4 13 0.54 0.44  
0 -4 -13 0.38 0.36  
0 4 -13 0.10 0.37  
0 4 13 1.12 0.51  
1 -4 13 -0.03 0.43  
-1 -4 -13 -0.23 0.31  
1 4 13 -0.60 0.47  
-1 4 -13 0.11 0.37  
2 -4 13 0.28 0.45  
-2 -4 -13 0.24 0.37  
2 4 13 1.29 0.61  
-2 4 -13 0.56 0.40  
-3 -4 -13 0.20 0.39  
3 4 13 0.70 0.62  
-11 -5 13 0.27 0.53  
11 -5 -13 -0.33 0.59  
11 5 -13 -0.20 0.42  
-11 5 13 0.55 0.47  
-10 -5 13 0.33 0.50  
10 -5 -13 0.19 0.56  
-10 5 13 1.63 0.50  
10 5 -13 0.17 0.46  
-9 -5 13 0.99 0.51  
9 -5 -13 0.08 0.58  
9 5 -13 0.21 0.46

|    |    |     |       |      |
|----|----|-----|-------|------|
| -9 | 5  | 13  | 0.97  | 0.50 |
| 8  | -5 | -13 | 0.78  | 0.58 |
| -8 | -5 | 13  | -0.05 | 0.45 |
| 8  | 5  | -13 | 1.12  | 0.46 |
| -8 | 5  | 13  | 1.56  | 0.50 |
| 7  | -5 | -13 | 0.20  | 0.51 |
| -7 | -5 | 13  | 0.69  | 0.43 |
| 7  | 5  | -13 | -0.12 | 0.40 |
| -7 | 5  | 13  | 0.17  | 0.36 |
| 6  | -5 | -13 | 0.45  | 0.51 |
| -6 | -5 | 13  | 0.18  | 0.39 |
| 6  | 5  | -13 | 0.40  | 0.35 |
| -6 | 5  | 13  | -0.10 | 0.31 |
| 5  | -5 | -13 | 0.56  | 0.46 |
| -5 | -5 | 13  | 1.72  | 0.47 |
| 5  | 5  | -13 | 0.52  | 0.39 |
| -5 | 5  | 13  | 0.79  | 0.34 |
| -4 | -5 | 13  | 1.44  | 0.46 |
| 4  | -5 | -13 | 0.33  | 0.46 |
| -4 | 5  | 13  | 0.52  | 0.32 |
| 4  | 5  | -13 | 1.04  | 0.39 |
| 3  | -5 | -13 | 5.33  | 0.71 |
| -3 | -5 | 13  | 3.05  | 0.48 |
| 3  | 5  | -13 | 3.38  | 0.46 |
| -3 | 5  | 13  | 3.23  | 0.46 |
| -2 | -5 | 13  | 0.99  | 0.42 |
| 2  | -5 | -13 | 0.08  | 0.34 |
| 2  | 5  | -13 | 0.33  | 0.33 |
| -2 | 5  | 13  | 0.89  | 0.33 |
| -1 | -5 | 13  | 0.53  | 0.42 |
| 1  | -5 | -13 | -0.04 | 0.35 |
| 1  | 5  | -13 | -0.01 | 0.33 |
| -1 | 5  | 13  | 0.45  | 0.30 |
| -1 | 5  | 13  | 0.08  | 0.53 |
| 0  | -5 | 13  | 1.15  | 0.48 |
| 0  | -5 | -13 | 0.73  | 0.42 |
| 0  | 5  | 13  | 0.71  | 0.57 |
| 0  | 5  | -13 | 1.11  | 0.45 |
| -1 | -5 | -13 | 0.10  | 0.41 |
| 1  | -5 | 13  | -0.05 | 0.43 |
| -1 | 5  | -13 | 0.01  | 0.37 |
| 1  | 5  | 13  | 0.55  | 0.60 |
| -2 | -5 | -13 | 0.11  | 0.38 |
| 2  | -5 | 13  | 0.11  | 0.47 |
| -2 | 5  | -13 | 0.50  | 0.43 |
| 2  | 5  | 13  | 0.63  | 0.58 |

|     |    |     |       |      |
|-----|----|-----|-------|------|
| 3   | -5 | 13  | 0.07  | 0.51 |
| -3  | -5 | -13 | 0.11  | 0.48 |
| 3   | 5  | 13  | 0.63  | 0.62 |
| -3  | 5  | -13 | 1.03  | 0.47 |
| 11  | -6 | -13 | 1.43  | 1.09 |
| -11 | -6 | 13  | 0.70  | 0.79 |
| -11 | 6  | 13  | 1.10  | 0.50 |
| 10  | -6 | -13 | 1.12  | 0.66 |
| -10 | -6 | 13  | 0.70  | 0.49 |
| 10  | 6  | -13 | 0.87  | 0.53 |
| -10 | 6  | 13  | 0.39  | 0.44 |
| 9   | -6 | -13 | -0.08 | 0.56 |
| -9  | -6 | 13  | -0.06 | 0.49 |
| 9   | 6  | -13 | 0.17  | 0.42 |
| -9  | 6  | 13  | 0.30  | 0.45 |
| -8  | -6 | 13  | 0.65  | 0.50 |
| 8   | -6 | -13 | -0.12 | 0.56 |
| -8  | 6  | 13  | 0.24  | 0.41 |
| 8   | 6  | -13 | -0.75 | 0.42 |
| 7   | -6 | -13 | 2.41  | 0.61 |
| -7  | -6 | 13  | 2.92  | 0.60 |
| -7  | 6  | 13  | 2.68  | 0.54 |
| 7   | 6  | -13 | 1.98  | 0.47 |
| 6   | -6 | -13 | 0.04  | 0.50 |
| -6  | -6 | 13  | 0.43  | 0.47 |
| 6   | 6  | -13 | 0.93  | 0.40 |
| -6  | 6  | 13  | 0.35  | 0.35 |
| -5  | -6 | 13  | 0.37  | 0.47 |
| 5   | -6 | -13 | 0.58  | 0.46 |
| -5  | 6  | 13  | 0.55  | 0.38 |
| 5   | 6  | -13 | 0.94  | 0.42 |
| 4   | -6 | -13 | 2.11  | 0.53 |
| -4  | -6 | 13  | 2.19  | 0.44 |
| -4  | -6 | 13  | 3.55  | 0.59 |
| 4   | 6  | -13 | 3.37  | 0.46 |
| -4  | 6  | 13  | 2.19  | 0.42 |
| 3   | -6 | -13 | 0.26  | 0.46 |
| -3  | -6 | 13  | 0.31  | 0.38 |
| -3  | 6  | 13  | -0.23 | 0.29 |
| -2  | -6 | 13  | 0.72  | 0.43 |
| 2   | -6 | -13 | 1.37  | 0.48 |
| 2   | -6 | -13 | 0.34  | 0.40 |
| 2   | 6  | -13 | 0.32  | 0.39 |
| -2  | 6  | 13  | 0.57  | 0.32 |
| -1  | -6 | 13  | 0.78  | 0.46 |
| 1   | -6 | -13 | 1.35  | 0.47 |

|     |    |     |       |      |
|-----|----|-----|-------|------|
| -1  | 6  | 13  | 1.80  | 0.42 |
| 1   | 6  | -13 | 1.32  | 0.43 |
| -1  | 6  | 13  | 2.24  | 0.60 |
| 0   | -6 | -13 | 0.33  | 0.44 |
| 0   | -6 | 13  | 0.27  | 0.46 |
| 0   | 6  | -13 | 0.12  | 0.39 |
| 0   | 6  | 13  | 0.54  | 0.36 |
| 0   | 6  | 13  | 0.36  | 0.57 |
| -1  | -6 | -13 | 0.29  | 0.46 |
| 1   | -6 | 13  | -0.49 | 0.45 |
| 1   | 6  | 13  | -0.06 | 0.58 |
| -1  | 6  | -13 | 0.39  | 0.42 |
| 2   | -6 | 13  | 1.05  | 0.54 |
| -2  | -6 | -13 | 1.02  | 0.52 |
| 2   | 6  | 13  | 0.43  | 0.54 |
| -2  | 6  | -13 | 1.27  | 0.49 |
| -3  | -6 | -13 | 1.62  | 0.90 |
| -3  | 6  | -13 | 0.37  | 0.46 |
| -10 | -7 | 13  | 0.45  | 0.56 |
| 10  | -7 | -13 | -0.19 | 0.59 |
| -10 | 7  | 13  | 0.43  | 0.51 |
| 10  | 7  | -13 | 0.02  | 0.42 |
| -9  | -7 | 13  | 0.55  | 0.48 |
| 9   | -7 | -13 | 0.08  | 0.58 |
| 9   | 7  | -13 | 0.65  | 0.45 |
| -9  | 7  | 13  | 0.65  | 0.52 |
| 8   | -7 | -13 | -0.01 | 0.51 |
| -8  | -7 | 13  | -0.14 | 0.47 |
| 8   | 7  | -13 | 0.12  | 0.46 |
| -8  | 7  | 13  | 0.06  | 0.47 |
| 7   | -7 | -13 | 0.40  | 0.55 |
| -7  | -7 | 13  | 0.04  | 0.49 |
| 7   | 7  | -13 | 0.09  | 0.46 |
| -7  | 7  | 13  | -0.11 | 0.45 |
| 6   | -7 | -13 | 0.08  | 0.52 |
| -6  | -7 | 13  | 0.04  | 0.48 |
| 6   | 7  | -13 | 0.68  | 0.47 |
| -6  | 7  | 13  | 0.43  | 0.40 |
| -5  | -7 | 13  | 1.18  | 0.53 |
| 5   | -7 | -13 | 0.98  | 0.55 |
| -5  | 7  | 13  | 1.18  | 0.45 |
| 5   | 7  | -13 | 0.87  | 0.47 |
| -4  | -7 | 13  | 0.41  | 0.39 |
| 4   | -7 | -13 | 0.30  | 0.44 |
| -4  | -7 | 13  | -0.19 | 0.43 |
| 4   | 7  | -13 | 0.46  | 0.39 |



|    |    |     |       |      |
|----|----|-----|-------|------|
| -4 | 7  | 13  | 0.06  | 0.33 |
| -3 | -7 | 13  | 2.02  | 0.48 |
| 3  | -7 | -13 | 3.15  | 0.63 |
| 3  | 7  | -13 | 1.74  | 0.50 |
| -3 | 7  | 13  | 2.42  | 0.47 |
| 2  | -7 | -13 | -0.14 | 0.41 |
| 2  | -7 | -13 | 0.36  | 0.43 |
| -2 | -7 | 13  | -0.08 | 0.40 |
| 2  | 7  | -13 | 0.57  | 0.41 |
| -2 | 7  | 13  | 0.08  | 0.36 |
| -1 | -7 | 13  | 0.14  | 0.45 |
| 1  | -7 | -13 | 0.37  | 0.44 |
| -1 | 7  | 13  | 0.22  | 0.56 |
| -1 | 7  | 13  | 0.50  | 0.39 |
| 1  | 7  | -13 | 0.59  | 0.44 |
| 0  | -7 | -13 | -0.28 | 0.40 |
| 0  | -7 | 13  | 0.24  | 0.47 |
| 0  | 7  | 13  | 0.63  | 0.57 |
| 0  | 7  | 13  | 0.37  | 0.36 |
| 0  | 7  | -13 | -0.18 | 0.42 |
| -1 | -7 | -13 | 0.65  | 0.50 |
| 1  | -7 | 13  | 0.67  | 0.48 |
| 1  | 7  | 13  | 0.74  | 0.59 |
| -1 | 7  | -13 | 0.29  | 0.44 |
| 2  | -7 | 13  | 0.03  | 0.52 |
| -2 | -7 | -13 | -0.05 | 0.48 |
| 2  | 7  | 13  | -0.43 | 0.64 |
| -2 | 7  | -13 | 0.31  | 0.46 |
| -3 | 7  | -13 | 0.65  | 0.71 |
| 9  | -8 | -13 | 1.47  | 0.70 |
| -9 | -8 | 13  | 2.86  | 0.66 |
| 9  | 8  | -13 | 2.66  | 0.59 |
| -9 | 8  | 13  | 2.53  | 0.63 |
| 8  | -8 | -13 | 1.41  | 0.64 |
| -8 | -8 | 13  | 1.36  | 0.57 |
| 8  | 8  | -13 | 1.45  | 0.51 |
| -8 | 8  | 13  | 1.75  | 0.53 |
| 7  | -8 | -13 | 0.53  | 0.59 |
| -7 | -8 | 13  | 0.93  | 0.53 |
| -7 | 8  | 13  | 0.31  | 0.47 |
| 7  | 8  | -13 | 0.04  | 0.42 |
| -6 | -8 | 13  | 1.14  | 0.52 |
| 6  | -8 | -13 | 0.40  | 0.56 |
| -6 | 8  | 13  | 0.33  | 0.43 |
| 6  | 8  | -13 | 0.29  | 0.47 |
| 5  | -8 | -13 | 0.18  | 0.54 |

-5 -8 13 0.37 0.49  
-5 8 13 0.24 0.40  
5 8 -13 0.57 0.41  
4 -8 -13 -0.03 0.52  
-4 -8 13 0.56 0.44  
-4 -8 13 1.96 0.58  
4 8 -13 0.82 0.47  
-4 8 13 0.91 0.41  
-3 -8 13 1.15 0.47  
3 -8 -13 1.28 0.59  
-3 8 13 0.58 0.43  
3 8 -13 0.39 0.44  
2 -8 -13 -0.03 0.47  
-2 -8 13 0.66 0.45  
-2 8 13 0.63 0.41  
2 8 -13 0.45 0.44  
1 -8 -13 0.60 0.48  
1 -8 -13 -0.71 0.42  
-1 -8 13 -0.06 0.43  
1 8 -13 0.20 0.44  
-1 8 13 0.07 0.37  
0 -8 13 0.48 0.50  
0 -8 -13 -0.11 0.47  
0 8 -13 0.23 0.41  
0 8 13 -0.30 0.56  
0 8 13 1.08 0.42  
-1 -8 -13 -0.02 0.50  
1 -8 13 0.33 0.51  
1 8 13 0.95 0.63  
-1 8 -13 0.19 0.45  
-8 -9 13 1.05 0.60  
8 -9 -13 0.75 0.69  
8 9 -13 0.26 0.47  
-8 9 13 1.33 0.52  
-7 -9 13 0.01 0.51  
7 -9 -13 -0.02 0.58  
-7 9 13 -0.16 0.44  
7 9 -13 0.15 0.43  
-6 -9 13 0.41 0.51  
6 -9 -13 -0.01 0.57  
-6 9 13 -0.04 0.49  
6 9 -13 0.31 0.44  
-5 -9 13 0.51 0.47  
5 -9 -13 0.36 0.57  
5 9 -13 0.65 0.45  
-5 9 13 0.73 0.44

-4 -9 13 0.30 0.42  
4 -9 -13 -0.04 0.53  
-4 9 13 0.22 0.45  
3 -9 -13 0.55 0.56  
-3 -9 13 0.68 0.45  
-3 9 13 0.44 0.39  
3 9 -13 0.92 0.49  
-2 -9 13 0.36 0.47  
2 -9 -13 0.55 0.54  
2 9 -13 0.63 0.42  
-2 9 13 0.28 0.36  
-1 -9 13 0.45 0.50  
1 -9 -13 1.10 0.55  
1 -9 -13 -0.76 0.48  
1 9 -13 -0.31 0.44  
-1 9 13 0.29 0.40  
0 -9 -13 -1.03 0.47  
0 -9 13 -0.41 0.46  
0 9 13 0.41 0.40  
0 9 -13 0.22 0.48  
-1 -9 -13 -0.23 0.75  
7 10 -13 0.71 0.56  
6 -10 -13 0.70 0.72  
-6 -10 13 1.72 0.86  
6 10 -13 0.52 0.50  
-5 -10 13 -0.08 0.52  
5 -10 -13 -0.14 0.58  
5 10 -13 -0.79 0.45  
-5 10 13 -0.04 0.45  
4 -10 -13 0.61 0.62  
-4 -10 13 0.81 0.47  
-4 10 13 0.12 0.43  
4 10 -13 0.57 0.51  
3 -10 -13 0.19 0.55  
-3 -10 13 0.31 0.48  
-3 10 13 0.05 0.39  
3 10 -13 0.68 0.45  
-2 -10 13 0.24 0.48  
2 -10 -13 0.44 0.58  
-2 10 13 -0.13 0.41  
1 -10 -13 -0.93 0.50  
-1 -10 13 0.67 0.52  
-1 10 13 0.46 0.38  
0 -10 -13 -0.22 0.61  
0 10 13 1.25 0.50  
6 11 -13 0.79 0.60

-4 -11 13 0.35 0.46  
-3 -11 13 0.49 0.51  
-12 0 14 0.35 0.53  
11 0 -14 0.30 0.59  
11 0 -14 0.32 0.48  
-11 0 14 0.44 0.51  
10 0 -14 -0.65 0.48  
-10 0 14 0.67 0.46  
-10 0 14 -0.41 0.40  
9 0 -14 -0.17 0.50  
-9 0 14 0.19 0.46  
-9 0 14 -0.35 0.38  
8 0 -14 -0.84 0.45  
-8 0 14 0.06 0.42  
-8 0 14 0.65 0.45  
-7 0 14 1.50 0.47  
7 0 -14 1.98 0.56  
-7 0 14 1.48 0.42  
6 0 -14 -0.30 0.43  
-6 0 14 -0.07 0.33  
5 0 -14 -0.29 0.40  
-5 0 14 -0.38 0.36  
4 0 -14 0.62 0.44  
-4 0 14 0.47 0.33  
3 0 -14 0.40 0.45  
-3 0 14 0.30 0.32  
-2 0 14 4.00 0.69  
2 0 -14 2.92 0.45  
-1 0 14 0.47 0.53  
1 0 -14 -0.12 0.32  
0 0 14 2.18 0.65  
0 0 -14 1.35 0.40  
-1 0 -14 0.19 0.40  
1 0 14 0.99 0.62  
2 0 14 1.85 0.67  
-2 0 -14 1.08 0.48  
-3 0 -14 -0.64 0.43  
3 0 14 -0.74 0.59  
12 -1 -14 -0.73 0.57  
-12 -1 14 -0.21 0.51  
-12 1 14 -0.19 0.47  
-11 -1 14 0.48 0.52  
11 -1 -14 -1.39 0.50  
11 1 -14 -0.13 0.46  
-11 1 14 0.16 0.49  
-11 1 14 0.30 0.50

|     |    |     |       |      |
|-----|----|-----|-------|------|
| 10  | -1 | -14 | -0.09 | 0.52 |
| -10 | -1 | 14  | 0.48  | 0.50 |
| 10  | 1  | -14 | 0.45  | 0.42 |
| -10 | 1  | 14  | 0.30  | 0.44 |
| -10 | 1  | 14  | 0.21  | 0.48 |
| -9  | -1 | 14  | 0.42  | 0.48 |
| 9   | -1 | -14 | -0.17 | 0.51 |
| -9  | 1  | 14  | 0.48  | 0.45 |
| -9  | 1  | 14  | -0.20 | 0.38 |
| -8  | -1 | 14  | 0.00  | 0.43 |
| 8   | -1 | -14 | 0.33  | 0.50 |
| -8  | -1 | 14  | 0.03  | 0.37 |
| -8  | 1  | 14  | -0.66 | 0.35 |
| 8   | 1  | -14 | -0.65 | 0.46 |
| -7  | -1 | 14  | 0.32  | 0.41 |
| 7   | -1 | -14 | -0.33 | 0.46 |
| -7  | -1 | 14  | -0.06 | 0.41 |
| -7  | 1  | 14  | 0.41  | 0.38 |
| 7   | 1  | -14 | -0.84 | 0.42 |
| 6   | -1 | -14 | -0.30 | 0.44 |
| -6  | -1 | 14  | 0.57  | 0.40 |
| -6  | -1 | 14  | 0.36  | 0.35 |
| -6  | 1  | 14  | 0.66  | 0.43 |
| 6   | 1  | -14 | 0.76  | 0.48 |
| -5  | -1 | 14  | -0.03 | 0.32 |
| 5   | -1 | -14 | 0.47  | 0.44 |
| 5   | 1  | -14 | 0.04  | 0.41 |
| -5  | 1  | 14  | 0.28  | 0.38 |
| 4   | -1 | -14 | 0.36  | 0.43 |
| -4  | -1 | 14  | -0.31 | 0.30 |
| 4   | 1  | -14 | -0.06 | 0.37 |
| -4  | 1  | 14  | -0.13 | 0.36 |
| -3  | -1 | 14  | 0.12  | 0.35 |
| 3   | -1 | -14 | 0.46  | 0.39 |
| -3  | 1  | 14  | 0.31  | 0.33 |
| 3   | 1  | -14 | 0.14  | 0.30 |
| 2   | -1 | -14 | 0.95  | 0.38 |
| -2  | -1 | 14  | 0.89  | 0.53 |
| -2  | -1 | 14  | 0.04  | 0.48 |
| -2  | 1  | 14  | 0.13  | 0.55 |
| 2   | 1  | -14 | 1.11  | 0.37 |
| -2  | 1  | 14  | 1.26  | 0.41 |
| -1  | -1 | 14  | 2.89  | 0.64 |
| -1  | -1 | 14  | 3.86  | 0.65 |
| 1   | -1 | -14 | 3.34  | 0.52 |
| -1  | 1  | 14  | 2.43  | 0.64 |

|     |    |     |       |      |
|-----|----|-----|-------|------|
| 1   | 1  | -14 | 3.78  | 0.53 |
| 0   | -1 | 14  | 0.16  | 0.49 |
| 0   | -1 | -14 | 0.12  | 0.38 |
| 0   | -1 | 14  | 0.89  | 0.57 |
| 0   | 1  | -14 | 0.21  | 0.37 |
| 0   | 1  | 14  | 0.50  | 0.58 |
| 1   | -1 | 14  | 2.72  | 0.68 |
| -1  | -1 | -14 | 2.23  | 0.48 |
| 1   | -1 | 14  | 2.36  | 0.65 |
| 1   | 1  | 14  | 2.69  | 0.71 |
| -1  | 1  | -14 | 2.37  | 0.53 |
| -2  | -1 | -14 | -0.42 | 0.40 |
| 2   | -1 | 14  | -0.76 | 0.51 |
| 2   | -1 | 14  | 0.32  | 0.61 |
| 2   | 1  | 14  | -0.43 | 0.58 |
| -2  | 1  | -14 | 0.35  | 0.43 |
| -3  | -1 | -14 | 0.26  | 0.41 |
| 3   | -1 | 14  | 1.88  | 0.70 |
| 3   | 1  | 14  | 1.01  | 0.68 |
| -3  | 1  | -14 | 0.01  | 0.49 |
| -12 | -2 | 14  | 0.73  | 0.58 |
| 12  | -2 | -14 | -0.07 | 0.59 |
| -12 | 2  | 14  | 0.66  | 0.49 |
| -11 | -2 | 14  | 1.83  | 0.60 |
| 11  | -2 | -14 | 0.04  | 0.58 |
| 11  | 2  | -14 | 0.51  | 0.54 |
| -11 | 2  | 14  | 0.82  | 0.49 |
| 10  | -2 | -14 | 0.61  | 0.59 |
| -10 | -2 | 14  | 0.34  | 0.45 |
| 10  | 2  | -14 | 0.21  | 0.44 |
| -10 | 2  | 14  | 0.72  | 0.52 |
| 9   | -2 | -14 | 1.55  | 0.61 |
| -9  | -2 | 14  | 1.88  | 0.56 |
| -9  | 2  | 14  | 1.18  | 0.44 |
| 9   | 2  | -14 | 2.06  | 0.54 |
| -8  | -2 | 14  | 1.16  | 0.48 |
| 8   | -2 | -14 | 1.11  | 0.58 |
| 8   | 2  | -14 | 1.54  | 0.45 |
| -8  | 2  | 14  | 2.21  | 0.52 |
| -7  | -2 | 14  | 0.62  | 0.44 |
| 7   | -2 | -14 | -0.02 | 0.45 |
| 7   | 2  | -14 | 0.35  | 0.41 |
| -7  | 2  | 14  | 0.45  | 0.39 |
| -6  | -2 | 14  | 0.02  | 0.39 |
| 6   | -2 | -14 | -0.03 | 0.46 |
| -6  | 2  | 14  | -0.34 | 0.39 |

|     |    |     |       |      |
|-----|----|-----|-------|------|
| -5  | -2 | 14  | 3.59  | 0.52 |
| 5   | -2 | -14 | 3.66  | 0.63 |
| -5  | 2  | 14  | 3.44  | 0.49 |
| 5   | 2  | -14 | 3.23  | 0.57 |
| -4  | -2 | 14  | 0.60  | 0.38 |
| 4   | -2 | -14 | 0.54  | 0.46 |
| -4  | 2  | 14  | -0.17 | 0.36 |
| 4   | 2  | -14 | 0.82  | 0.42 |
| 3   | -2 | -14 | 1.04  | 0.46 |
| -3  | 2  | 14  | 0.08  | 0.35 |
| 3   | 2  | -14 | 0.09  | 0.30 |
| 3   | 2  | -14 | 0.50  | 0.39 |
| 2   | -2 | -14 | 0.22  | 0.32 |
| -2  | -2 | 14  | 1.20  | 0.55 |
| -2  | -2 | 14  | 0.93  | 0.49 |
| -2  | 2  | 14  | 1.39  | 0.60 |
| -2  | 2  | 14  | 1.49  | 0.40 |
| 2   | 2  | -14 | 1.32  | 0.38 |
| -1  | -2 | 14  | 0.49  | 0.51 |
| 1   | -2 | -14 | -0.32 | 0.33 |
| -1  | -2 | 14  | -0.48 | 0.48 |
| -1  | 2  | 14  | 0.42  | 0.55 |
| 1   | 2  | -14 | 0.41  | 0.30 |
| 0   | -2 | 14  | 1.06  | 0.55 |
| 0   | -2 | 14  | 0.38  | 0.54 |
| 0   | -2 | -14 | 0.08  | 0.36 |
| 0   | 2  | -14 | 0.91  | 0.40 |
| 0   | 2  | 14  | -0.19 | 0.56 |
| 1   | -2 | 14  | 1.02  | 0.63 |
| 1   | -2 | 14  | 1.95  | 0.66 |
| -1  | -2 | -14 | 0.64  | 0.43 |
| -1  | 2  | -14 | 1.24  | 0.45 |
| 1   | 2  | 14  | 1.59  | 0.65 |
| 2   | -2 | 14  | 0.08  | 0.62 |
| 2   | -2 | 14  | 0.62  | 0.61 |
| -2  | -2 | -14 | -0.07 | 0.41 |
| 2   | 2  | 14  | -0.25 | 0.59 |
| -2  | 2  | -14 | 0.34  | 0.40 |
| 3   | -2 | 14  | 0.27  | 0.96 |
| 3   | -2 | 14  | 0.22  | 0.62 |
| -3  | -2 | -14 | 0.40  | 0.52 |
| 3   | 2  | 14  | -0.77 | 0.92 |
| 12  | -3 | -14 | -0.59 | 0.92 |
| 11  | -3 | -14 | 0.61  | 0.58 |
| -11 | -3 | 14  | 0.84  | 0.54 |
| -11 | 3  | 14  | 0.22  | 0.46 |

|     |    |     |       |      |
|-----|----|-----|-------|------|
| 11  | 3  | -14 | 0.57  | 0.45 |
| 10  | -3 | -14 | 0.00  | 0.53 |
| -10 | -3 | 14  | 0.05  | 0.50 |
| 10  | 3  | -14 | 0.36  | 0.43 |
| -10 | 3  | 14  | 0.34  | 0.42 |
| 9   | -3 | -14 | -0.07 | 0.55 |
| -9  | -3 | 14  | -0.06 | 0.48 |
| -9  | 3  | 14  | 0.93  | 0.45 |
| 9   | 3  | -14 | 0.39  | 0.48 |
| 8   | -3 | -14 | 1.22  | 0.56 |
| -8  | -3 | 14  | 1.69  | 0.49 |
| 8   | 3  | -14 | 1.07  | 0.44 |
| -8  | 3  | 14  | 1.33  | 0.50 |
| 7   | -3 | -14 | 0.74  | 0.55 |
| -7  | -3 | 14  | 0.57  | 0.48 |
| 7   | 3  | -14 | 1.13  | 0.48 |
| -7  | 3  | 14  | 0.20  | 0.38 |
| 6   | -3 | -14 | 2.88  | 0.64 |
| -6  | -3 | 14  | 3.31  | 0.56 |
| 6   | 3  | -14 | 2.53  | 0.47 |
| -6  | 3  | 14  | 3.29  | 0.50 |
| -5  | -3 | 14  | -0.29 | 0.40 |
| 5   | -3 | -14 | -0.09 | 0.45 |
| 5   | 3  | -14 | -0.36 | 0.30 |
| -5  | 3  | 14  | 0.09  | 0.38 |
| -4  | -3 | 14  | 1.09  | 0.45 |
| 4   | -3 | -14 | 1.69  | 0.51 |
| -4  | 3  | 14  | 0.73  | 0.41 |
| 4   | 3  | -14 | 0.37  | 0.35 |
| 3   | -3 | -14 | 1.06  | 0.48 |
| -3  | -3 | 14  | 0.64  | 0.41 |
| 3   | 3  | -14 | 0.86  | 0.38 |
| -3  | 3  | 14  | 1.35  | 0.44 |
| -2  | -3 | 14  | -0.14 | 0.40 |
| 2   | -3 | -14 | 0.06  | 0.32 |
| -2  | 3  | 14  | 0.80  | 0.38 |
| -2  | 3  | 14  | -0.85 | 0.52 |
| 2   | 3  | -14 | 0.61  | 0.35 |
| -1  | -3 | 14  | 0.75  | 0.44 |
| 1   | -3 | -14 | 0.83  | 0.40 |
| 1   | 3  | -14 | 1.07  | 0.57 |
| -1  | 3  | 14  | 0.71  | 0.58 |
| 0   | -3 | -14 | 2.97  | 0.53 |
| 0   | 3  | 14  | 3.17  | 0.74 |
| 1   | -3 | 14  | 0.02  | 0.57 |
| -1  | -3 | -14 | -0.17 | 0.40 |



|     |    |     |       |      |
|-----|----|-----|-------|------|
| 1   | 3  | 14  | -0.43 | 0.55 |
| -1  | 3  | -14 | 0.10  | 0.37 |
| 2   | -3 | 14  | 0.15  | 0.51 |
| -2  | -3 | -14 | -0.22 | 0.36 |
| 2   | 3  | 14  | 0.33  | 0.63 |
| -2  | 3  | -14 | 0.40  | 0.41 |
| 3   | -3 | 14  | 1.75  | 1.08 |
| 11  | -4 | -14 | -0.29 | 0.56 |
| -11 | -4 | 14  | -0.41 | 0.52 |
| 11  | 4  | -14 | -1.06 | 0.58 |
| -11 | 4  | 14  | 0.34  | 0.51 |
| 10  | -4 | -14 | 0.14  | 0.58 |
| -10 | -4 | 14  | 0.82  | 0.52 |
| -10 | 4  | 14  | 0.42  | 0.50 |
| 10  | 4  | -14 | 0.31  | 0.42 |
| -9  | -4 | 14  | 1.76  | 0.53 |
| 9   | -4 | -14 | 1.31  | 0.65 |
| 9   | 4  | -14 | 1.09  | 0.45 |
| -9  | 4  | 14  | 2.07  | 0.57 |
| -8  | -4 | 14  | 0.91  | 0.50 |
| 8   | -4 | -14 | 0.59  | 0.56 |
| 8   | 4  | -14 | 0.95  | 0.49 |
| -8  | 4  | 14  | 1.97  | 0.53 |
| -7  | -4 | 14  | -0.09 | 0.44 |
| 7   | -4 | -14 | 0.12  | 0.49 |
| -7  | 4  | 14  | -0.13 | 0.42 |
| 7   | 4  | -14 | 0.34  | 0.36 |
| 6   | -4 | -14 | 0.21  | 0.49 |
| -6  | -4 | 14  | -0.40 | 0.44 |
| 6   | 4  | -14 | 0.68  | 0.43 |
| -6  | 4  | 14  | -0.10 | 0.35 |
| 5   | -4 | -14 | 0.88  | 0.53 |
| -5  | -4 | 14  | 0.68  | 0.41 |
| 5   | 4  | -14 | -0.02 | 0.38 |
| -5  | 4  | 14  | 0.89  | 0.44 |
| 4   | -4 | -14 | 0.36  | 0.48 |
| -4  | -4 | 14  | 0.46  | 0.43 |
| -4  | 4  | 14  | 0.69  | 0.34 |
| 4   | 4  | -14 | 0.57  | 0.37 |
| 3   | -4 | -14 | 2.30  | 0.55 |
| -3  | -4 | 14  | 1.04  | 0.42 |
| -3  | 4  | 14  | 1.08  | 0.40 |
| 3   | 4  | -14 | 1.57  | 0.45 |
| 2   | -4 | -14 | 1.93  | 0.46 |
| -2  | -4 | 14  | 2.33  | 0.50 |
| -2  | 4  | 14  | 3.03  | 0.68 |

|     |    |     |      |      |
|-----|----|-----|------|------|
| 2   | 4  | -14 | 1.66 | 0.41 |
| -2  | 4  | 14  | 2.82 | 0.43 |
| -1  | -4 | 14  | 1.41 | 0.48 |
| 1   | -4 | -14 | 0.84 | 0.43 |
| -1  | 4  | 14  | 1.59 | 0.65 |
| 1   | 4  | -14 | 1.46 | 0.45 |
| 0   | -4 | 14  | 1.16 | 0.51 |
| 0   | -4 | -14 | 0.44 | 0.41 |
| 0   | 4  | -14 | 1.15 | 0.45 |
| 0   | 4  | 14  | 1.49 | 0.66 |
| -1  | -4 | -14 | 0.66 | 0.44 |
| 1   | -4 | 14  | 1.08 | 0.49 |
| 1   | 4  | 14  | 0.47 | 0.56 |
| -2  | -4 | -14 | 0.33 | 0.47 |
| 2   | 4  | 14  | 0.39 | 0.64 |
| -10 | -5 | 14  | 0.02 | 0.53 |
| 10  | -5 | -14 | 0.59 | 0.61 |
| -10 | 5  | 14  | 0.31 | 0.47 |
| 10  | 5  | -14 | 0.49 | 0.45 |
| -9  | -5 | 14  | 0.65 | 0.54 |
| 9   | -5 | -14 | 0.05 | 0.57 |
| -9  | 5  | 14  | 0.03 | 0.43 |
| 9   | 5  | -14 | 0.05 | 0.47 |
| -8  | -5 | 14  | 2.07 | 0.60 |
| 8   | -5 | -14 | 2.06 | 0.67 |
| 8   | 5  | -14 | 1.55 | 0.51 |
| -8  | 5  | 14  | 2.51 | 0.57 |
| -7  | -5 | 14  | 1.42 | 0.55 |
| 7   | -5 | -14 | 1.04 | 0.57 |
| -7  | 5  | 14  | 1.44 | 0.51 |
| 7   | 5  | -14 | 1.85 | 0.47 |
| -6  | -5 | 14  | 0.40 | 0.46 |
| 6   | -5 | -14 | 0.97 | 0.56 |
| 6   | 5  | -14 | 0.88 | 0.45 |
| -6  | 5  | 14  | 1.04 | 0.40 |
| 5   | -5 | -14 | 1.93 | 0.62 |
| -5  | -5 | 14  | 2.65 | 0.57 |
| -5  | 5  | 14  | 2.13 | 0.43 |
| 5   | 5  | -14 | 2.65 | 0.52 |
| -4  | -5 | 14  | 1.70 | 0.53 |
| 4   | -5 | -14 | 1.97 | 0.59 |
| 4   | 5  | -14 | 0.92 | 0.40 |
| -4  | 5  | 14  | 2.03 | 0.45 |
| -3  | -5 | 14  | 0.99 | 0.45 |
| 3   | -5 | -14 | 0.31 | 0.49 |
| -3  | 5  | 14  | 0.93 | 0.36 |

|     |    |     |       |      |
|-----|----|-----|-------|------|
| 3   | 5  | -14 | 0.30  | 0.40 |
| -2  | -5 | 14  | 0.56  | 0.44 |
| 2   | 5  | -14 | 0.72  | 0.39 |
| -2  | 5  | 14  | 0.11  | 0.31 |
| 1   | -5 | -14 | 0.91  | 0.45 |
| -1  | -5 | 14  | 1.83  | 0.53 |
| -1  | 5  | 14  | 1.95  | 0.66 |
| -1  | 5  | 14  | 0.77  | 0.38 |
| 1   | 5  | -14 | 0.61  | 0.42 |
| 0   | -5 | -14 | -0.06 | 0.41 |
| 0   | -5 | 14  | 0.44  | 0.46 |
| 0   | 5  | 14  | -0.36 | 0.57 |
| 0   | 5  | -14 | 0.00  | 0.39 |
| 1   | -5 | 14  | 0.14  | 0.48 |
| -1  | -5 | -14 | -0.26 | 0.36 |
| -1  | 5  | -14 | 0.15  | 0.42 |
| 1   | 5  | 14  | -0.42 | 0.60 |
| -2  | -5 | -14 | -0.21 | 0.45 |
| 2   | -5 | 14  | 0.25  | 0.75 |
| 10  | -6 | -14 | -0.43 | 0.93 |
| -10 | -6 | 14  | 0.83  | 0.59 |
| -10 | 6  | 14  | -0.07 | 0.50 |
| -9  | -6 | 14  | 0.99  | 0.56 |
| 9   | -6 | -14 | -0.49 | 0.59 |
| -9  | 6  | 14  | 0.46  | 0.47 |
| 9   | 6  | -14 | 0.30  | 0.44 |
| -8  | -6 | 14  | 0.88  | 0.50 |
| 8   | -6 | -14 | 0.56  | 0.60 |
| 8   | 6  | -14 | 0.54  | 0.44 |
| -8  | 6  | 14  | -0.17 | 0.46 |
| 7   | -6 | -14 | 0.83  | 0.60 |
| -7  | -6 | 14  | 1.04  | 0.54 |
| -7  | 6  | 14  | 0.97  | 0.45 |
| 7   | 6  | -14 | 0.83  | 0.49 |
| 6   | -6 | -14 | 2.51  | 0.67 |
| -6  | -6 | 14  | 1.49  | 0.50 |
| 6   | 6  | -14 | 1.47  | 0.50 |
| -6  | 6  | 14  | 1.30  | 0.47 |
| -5  | -6 | 14  | 0.04  | 0.44 |
| 5   | -6 | -14 | 0.06  | 0.52 |
| 5   | 6  | -14 | -0.24 | 0.37 |
| -5  | 6  | 14  | 0.33  | 0.39 |
| 4   | -6 | -14 | 3.21  | 0.65 |
| -4  | -6 | 14  | 2.79  | 0.56 |
| 4   | 6  | -14 | 2.26  | 0.55 |
| -4  | 6  | 14  | 1.97  | 0.44 |

|    |    |     |       |      |
|----|----|-----|-------|------|
| 3  | -6 | -14 | 0.53  | 0.50 |
| -3 | -6 | 14  | 0.61  | 0.43 |
| 3  | 6  | -14 | 0.44  | 0.44 |
| -3 | 6  | 14  | 0.24  | 0.34 |
| 2  | -6 | -14 | 1.35  | 0.51 |
| -2 | -6 | 14  | 0.02  | 0.44 |
| -2 | 6  | 14  | 0.15  | 0.33 |
| 2  | 6  | -14 | 0.43  | 0.40 |
| -1 | -6 | 14  | 1.00  | 0.49 |
| 1  | -6 | -14 | -0.29 | 0.40 |
| -1 | 6  | 14  | 0.29  | 0.38 |
| -1 | 6  | 14  | 0.87  | 0.62 |
| 1  | 6  | -14 | 0.01  | 0.41 |
| 0  | -6 | 14  | -0.01 | 0.42 |
| 0  | -6 | -14 | -0.25 | 0.44 |
| 0  | 6  | 14  | -0.04 | 0.61 |
| 0  | 6  | -14 | -0.03 | 0.41 |
| -1 | -6 | -14 | 0.23  | 0.48 |
| 1  | -6 | 14  | 0.00  | 0.50 |
| 1  | 6  | 14  | 0.17  | 0.75 |
| -1 | 6  | -14 | 0.77  | 0.44 |
| -2 | 6  | -14 | -0.05 | 0.42 |
| 9  | -7 | -14 | -0.67 | 1.02 |
| -9 | -7 | 14  | -0.14 | 0.46 |
| 9  | 7  | -14 | -0.49 | 0.44 |
| -9 | 7  | 14  | 0.13  | 0.57 |
| -8 | -7 | 14  | 0.27  | 0.55 |
| 8  | -7 | -14 | 2.09  | 0.71 |
| 8  | 7  | -14 | 0.92  | 0.48 |
| -8 | 7  | 14  | 1.11  | 0.51 |
| 7  | -7 | -14 | 0.25  | 0.59 |
| -7 | -7 | 14  | -0.16 | 0.49 |
| -7 | 7  | 14  | -0.19 | 0.46 |
| 7  | 7  | -14 | -0.29 | 0.45 |
| 6  | -7 | -14 | 0.86  | 0.62 |
| -6 | -7 | 14  | 0.53  | 0.52 |
| -6 | 7  | 14  | 1.04  | 0.44 |
| 6  | 7  | -14 | 1.57  | 0.48 |
| 5  | -7 | -14 | 1.91  | 0.62 |
| -5 | -7 | 14  | 2.39  | 0.62 |
| -5 | 7  | 14  | 2.20  | 0.48 |
| 5  | 7  | -14 | 2.88  | 0.56 |
| 4  | -7 | -14 | 0.20  | 0.45 |
| -4 | 7  | 14  | 0.20  | 0.35 |
| 3  | -7 | -14 | 0.10  | 0.49 |
| -3 | -7 | 14  | 0.39  | 0.44 |

-3 7 14 0.62 0.37  
3 7 -14 0.67 0.46  
2 -7 -14 0.35 0.49  
-2 -7 14 0.43 0.46  
2 7 -14 0.19 0.37  
-2 7 14 0.37 0.39  
1 -7 -14 0.27 0.47  
-1 -7 14 0.41 0.49  
-1 7 14 -0.01 0.37  
1 7 -14 0.19 0.45  
0 -7 -14 0.28 0.49  
0 -7 14 1.78 0.55  
0 7 -14 1.60 0.53  
0 7 14 0.85 0.67  
-1 -7 -14 0.04 0.51  
-1 7 -14 -0.13 0.42  
-8 -8 14 -0.30 0.70  
8 8 -14 -0.21 0.52  
-7 -8 14 0.47 0.52  
7 -8 -14 0.16 0.61  
-7 8 14 1.06 0.56  
7 8 -14 0.04 0.51  
6 -8 -14 0.72 0.59  
-6 -8 14 0.04 0.45  
-6 8 14 0.29 0.43  
6 8 -14 -0.34 0.46  
-5 -8 14 1.04 0.55  
5 -8 -14 0.89 0.55  
-5 8 14 1.48 0.52  
5 8 -14 1.84 0.53  
4 -8 -14 0.48 0.55  
4 8 -14 0.28 0.42  
-4 8 14 0.02 0.37  
3 -8 -14 0.53 0.52  
-3 -8 14 0.39 0.44  
-3 8 14 0.07 0.36  
3 8 -14 -0.41 0.42  
-2 -8 14 1.31 0.51  
2 -8 -14 0.74 0.55  
2 8 -14 0.73 0.46  
-2 8 14 0.83 0.44  
1 -8 -14 1.81 0.96  
1 -8 -14 -0.71 0.47  
-1 -8 14 0.23 0.48  
1 8 -14 -0.23 0.44  
-1 8 14 0.13 0.40

|     |     |     |       |      |
|-----|-----|-----|-------|------|
| 0   | -8  | -14 | -0.27 | 0.50 |
| 7   | 9   | -14 | 0.87  | 0.56 |
| 6   | 9   | -14 | 0.41  | 0.47 |
| -5  | -9  | 14  | -0.07 | 0.47 |
| -5  | 9   | 14  | -0.14 | 0.47 |
| 4   | -9  | -14 | 0.74  | 1.03 |
| 4   | 9   | -14 | 0.88  | 0.59 |
| -4  | 9   | 14  | 0.52  | 0.48 |
| -3  | -9  | 14  | 0.72  | 0.49 |
| -3  | 9   | 14  | 0.88  | 0.46 |
| 3   | 9   | -14 | 0.50  | 0.69 |
| -2  | -9  | 14  | 0.47  | 0.48 |
| -2  | 9   | 14  | -0.23 | 0.35 |
| -1  | 9   | 14  | 0.50  | 0.44 |
| 6   | 10  | -14 | 0.86  | 0.56 |
| -3  | -10 | 14  | -0.04 | 0.51 |
| -12 | 0   | 15  | -0.19 | 0.77 |
| -11 | 0   | 15  | -0.56 | 0.48 |
| -10 | 0   | 15  | 1.06  | 0.54 |
| 10  | 0   | -15 | 0.76  | 0.75 |
| 9   | 0   | -15 | 0.70  | 0.60 |
| -9  | 0   | 15  | 1.43  | 0.54 |
| -8  | 0   | 15  | 0.22  | 0.40 |
| 8   | 0   | -15 | -0.76 | 0.50 |
| 7   | 0   | -15 | 0.39  | 0.53 |
| -7  | 0   | 15  | -0.38 | 0.42 |
| 6   | 0   | -15 | 0.38  | 0.53 |
| -6  | 0   | 15  | 0.38  | 0.39 |
| -5  | 0   | 15  | 0.46  | 0.38 |
| 5   | 0   | -15 | -0.28 | 0.44 |
| 4   | 0   | -15 | 0.08  | 0.44 |
| -4  | 0   | 15  | 0.42  | 0.37 |
| 3   | 0   | -15 | 1.27  | 0.48 |
| 2   | 0   | -15 | -0.26 | 0.35 |
| -2  | 0   | 15  | 0.70  | 0.59 |
| 1   | 0   | -15 | 0.78  | 0.41 |
| -1  | 0   | 15  | 1.74  | 0.65 |
| 0   | 0   | 15  | 0.45  | 0.67 |
| 0   | 0   | -15 | -0.19 | 0.39 |
| -1  | 0   | -15 | 0.19  | 0.42 |
| 1   | 0   | 15  | 0.27  | 0.64 |
| 2   | 0   | 15  | 1.06  | 0.75 |
| 12  | -1  | -15 | -0.52 | 0.66 |
| 11  | -1  | -15 | -0.78 | 0.59 |
| -11 | -1  | 15  | 0.05  | 0.55 |
| 10  | -1  | -15 | 0.00  | 0.58 |

|     |    |     |       |      |
|-----|----|-----|-------|------|
| -10 | -1 | 15  | 1.16  | 0.56 |
| 10  | 1  | -15 | 0.69  | 0.49 |
| -10 | 1  | 15  | 0.01  | 0.49 |
| 9   | -1 | -15 | -0.45 | 0.51 |
| -9  | -1 | 15  | 0.13  | 0.48 |
| 9   | 1  | -15 | 0.62  | 0.41 |
| -9  | 1  | 15  | 0.21  | 0.42 |
| -8  | -1 | 15  | -0.54 | 0.45 |
| 8   | -1 | -15 | -0.53 | 0.53 |
| -8  | 1  | 15  | 0.27  | 0.42 |
| -7  | -1 | 15  | 0.70  | 0.42 |
| 7   | -1 | -15 | 0.17  | 0.54 |
| -7  | 1  | 15  | 0.63  | 0.42 |
| -6  | -1 | 15  | 0.17  | 0.44 |
| 6   | -1 | -15 | -0.17 | 0.51 |
| -6  | 1  | 15  | 0.23  | 0.39 |
| 6   | 1  | -15 | -0.17 | 0.50 |
| -5  | -1 | 15  | 0.15  | 0.41 |
| 5   | -1 | -15 | 0.33  | 0.48 |
| 5   | 1  | -15 | -0.13 | 0.44 |
| -5  | 1  | 15  | 0.42  | 0.43 |
| 4   | -1 | -15 | 0.55  | 0.47 |
| -4  | -1 | 15  | -0.07 | 0.38 |
| -4  | 1  | 15  | 0.34  | 0.37 |
| 4   | 1  | -15 | -0.06 | 0.44 |
| 3   | -1 | -15 | 0.96  | 0.48 |
| -3  | 1  | 15  | -0.61 | 0.36 |
| 3   | 1  | -15 | 0.74  | 0.47 |
| -2  | -1 | 15  | -0.26 | 0.59 |
| 2   | -1 | -15 | -0.41 | 0.36 |
| -2  | -1 | 15  | -0.18 | 0.53 |
| 2   | 1  | -15 | 0.05  | 0.35 |
| -2  | 1  | 15  | 0.08  | 0.62 |
| -1  | -1 | 15  | 0.70  | 0.58 |
| 1   | -1 | -15 | 0.28  | 0.40 |
| -1  | -1 | 15  | 0.97  | 0.64 |
| -1  | 1  | 15  | 0.09  | 0.59 |
| 1   | 1  | -15 | 0.69  | 0.39 |
| 0   | -1 | -15 | 1.85  | 0.47 |
| 0   | -1 | 15  | 2.82  | 0.74 |
| 0   | 1  | -15 | 2.25  | 0.51 |
| 0   | 1  | 15  | 2.77  | 0.74 |
| -1  | -1 | -15 | -0.11 | 0.36 |
| 1   | -1 | 15  | 0.69  | 0.65 |
| -1  | 1  | -15 | 0.74  | 0.48 |
| 1   | 1  | 15  | -0.21 | 0.59 |

2 -1 15 -0.67 0.63  
-11 -2 15 -0.05 0.51  
11 -2 -15 -0.53 0.54  
-10 -2 15 0.54 0.53  
10 -2 -15 -0.73 0.55  
10 2 -15 0.74 0.47  
-10 2 15 -0.01 0.45  
9 -2 -15 -0.59 0.54  
-9 -2 15 1.14 0.51  
-9 2 15 0.13 0.49  
9 2 -15 0.93 0.50  
-8 -2 15 1.03 0.53  
8 -2 -15 2.18 0.63  
-8 2 15 1.90 0.50  
8 2 -15 2.21 0.55  
-7 -2 15 0.35 0.45  
7 -2 -15 0.50 0.54  
7 2 -15 0.23 0.39  
-7 2 15 0.49 0.46  
-6 -2 15 -0.14 0.45  
6 -2 -15 0.16 0.51  
6 2 -15 0.30 0.43  
-6 2 15 -0.24 0.37  
5 -2 -15 0.29 0.50  
-5 2 15 0.26 0.43  
5 2 -15 0.84 0.44  
4 -2 -15 0.38 0.48  
-4 2 15 0.30 0.44  
4 2 -15 0.81 0.42  
3 -2 -15 0.77 0.50  
-3 2 15 0.39 0.42  
-2 -2 15 0.10 0.53  
-2 2 15 -0.72 0.58  
2 2 -15 0.45 0.39  
1 -2 -15 0.24 0.40  
-1 -2 15 0.94 0.59  
1 2 -15 0.05 0.37  
-1 2 15 1.13 0.66  
0 -2 15 0.78 0.64  
0 -2 -15 0.87 0.45  
0 -2 15 0.14 0.63  
0 2 -15 0.65 0.44  
0 2 15 1.30 0.68  
-1 -2 -15 -0.18 0.39  
1 -2 15 0.22 0.58  
1 -2 15 0.03 0.60



-1 2 -15 0.19 0.42  
1 2 15 -0.68 0.59  
2 -2 15 -0.21 0.62  
-11 -3 15 -0.18 0.58  
11 -3 -15 -0.61 0.69  
10 -3 -15 -0.58 0.55  
-10 -3 15 0.34 0.53  
-10 3 15 0.09 0.44  
10 3 -15 -0.32 0.47  
9 -3 -15 -0.51 0.57  
-9 -3 15 0.85 0.54  
9 3 -15 0.80 0.50  
-9 3 15 0.44 0.46  
-8 -3 15 1.49 0.55  
8 -3 -15 0.97 0.61  
8 3 -15 0.96 0.46  
-8 3 15 0.87 0.51  
-7 -3 15 0.42 0.49  
7 -3 -15 0.54 0.56  
7 3 -15 0.51 0.43  
-7 3 15 0.71 0.50  
-6 -3 15 1.06 0.50  
6 -3 -15 2.10 0.62  
6 3 -15 1.20 0.44  
-6 3 15 0.98 0.44  
-5 -3 15 -0.31 0.42  
5 -3 -15 0.41 0.50  
5 3 -15 0.03 0.42  
-5 3 15 0.07 0.38  
4 -3 -15 0.26 0.46  
-4 -3 15 -0.29 0.42  
4 3 -15 0.59 0.37  
-4 3 15 -0.37 0.39  
3 -3 -15 0.72 0.51  
-3 3 15 0.01 0.41  
-2 -3 15 1.25 0.55  
2 3 -15 1.28 0.41  
1 -3 -15 0.11 0.40  
-1 -3 15 1.01 0.53  
1 3 -15 -0.03 0.34  
-1 3 15 0.15 0.62  
0 -3 15 1.09 0.62  
0 -3 -15 0.57 0.43  
0 3 15 1.54 0.70  
0 3 -15 0.86 0.44  
1 -3 15 0.51 0.61

|     |    |     |       |      |
|-----|----|-----|-------|------|
| -1  | -3 | -15 | 0.15  | 0.44 |
| 1   | 3  | 15  | 0.94  | 0.99 |
| -1  | 3  | -15 | 1.03  | 0.47 |
| 10  | -4 | -15 | -0.83 | 0.58 |
| -10 | -4 | 15  | 0.37  | 0.54 |
| 9   | -4 | -15 | -0.23 | 0.58 |
| -9  | -4 | 15  | 0.61  | 0.55 |
| 9   | 4  | -15 | -0.19 | 0.45 |
| -9  | 4  | 15  | 0.33  | 0.47 |
| 8   | -4 | -15 | 0.65  | 0.62 |
| -8  | -4 | 15  | 2.01  | 0.59 |
| 8   | 4  | -15 | 0.08  | 0.45 |
| -8  | 4  | 15  | 1.02  | 0.52 |
| 7   | -4 | -15 | -0.42 | 0.49 |
| -7  | -4 | 15  | -0.38 | 0.45 |
| 7   | 4  | -15 | 0.43  | 0.42 |
| -7  | 4  | 15  | -0.53 | 0.37 |
| -6  | -4 | 15  | 1.57  | 0.54 |
| 6   | -4 | -15 | 0.53  | 0.56 |
| 6   | 4  | -15 | 0.95  | 0.47 |
| -6  | 4  | 15  | 0.61  | 0.47 |
| 5   | -4 | -15 | 0.86  | 0.53 |
| -5  | -4 | 15  | 0.96  | 0.50 |
| 5   | 4  | -15 | 1.10  | 0.45 |
| -5  | 4  | 15  | 0.29  | 0.45 |
| 4   | -4 | -15 | 0.65  | 0.54 |
| -4  | 4  | 15  | -0.13 | 0.42 |
| 3   | -4 | -15 | 1.37  | 0.56 |
| -3  | 4  | 15  | 0.34  | 0.42 |
| 3   | 4  | -15 | 0.99  | 0.44 |
| -2  | -4 | 15  | -0.06 | 0.44 |
| -2  | 4  | 15  | 0.83  | 0.45 |
| 2   | 4  | -15 | 0.59  | 0.40 |
| -1  | -4 | 15  | -0.01 | 0.46 |
| 1   | -4 | -15 | -0.09 | 0.41 |
| -1  | 4  | 15  | -0.52 | 0.60 |
| 0   | -4 | -15 | -1.03 | 0.38 |
| 0   | 4  | 15  | 0.32  | 0.67 |
| -1  | -4 | -15 | 1.02  | 0.51 |
| 1   | -4 | 15  | 0.51  | 0.63 |
| 9   | -5 | -15 | -0.94 | 0.54 |
| -9  | -5 | 15  | -0.30 | 0.54 |
| -9  | 5  | 15  | -0.51 | 0.43 |
| 9   | 5  | -15 | 0.87  | 0.56 |
| 8   | -5 | -15 | 0.44  | 0.61 |
| -8  | -5 | 15  | 1.68  | 0.59 |

|    |    |     |       |      |
|----|----|-----|-------|------|
| -8 | 5  | 15  | 0.68  | 0.46 |
| 8  | 5  | -15 | 1.01  | 0.48 |
| 7  | -5 | -15 | 2.87  | 0.71 |
| -7 | -5 | 15  | 1.59  | 0.58 |
| -7 | 5  | 15  | 2.30  | 0.56 |
| 7  | 5  | -15 | 2.02  | 0.51 |
| 6  | -5 | -15 | 0.48  | 0.54 |
| -6 | -5 | 15  | 0.38  | 0.51 |
| -6 | 5  | 15  | 0.66  | 0.48 |
| 6  | 5  | -15 | -0.12 | 0.45 |
| 5  | -5 | -15 | 0.42  | 0.56 |
| -5 | -5 | 15  | 0.78  | 0.51 |
| 5  | 5  | -15 | 0.00  | 0.43 |
| -5 | 5  | 15  | 0.64  | 0.39 |
| 4  | -5 | -15 | 0.79  | 0.55 |
| -4 | 5  | 15  | 0.32  | 0.41 |
| 3  | -5 | -15 | 1.38  | 0.57 |
| -3 | 5  | 15  | 1.01  | 0.44 |
| 3  | 5  | -15 | 1.15  | 0.44 |
| -2 | -5 | 15  | 0.47  | 0.46 |
| 2  | -5 | -15 | 0.92  | 0.51 |
| 2  | 5  | -15 | 0.28  | 0.39 |
| -2 | 5  | 15  | 0.25  | 0.33 |
| 1  | -5 | -15 | 0.67  | 0.46 |
| -1 | -5 | 15  | 0.64  | 0.51 |
| -1 | 5  | 15  | 1.51  | 0.70 |
| 1  | 5  | -15 | 0.78  | 0.46 |
| 0  | -5 | -15 | 0.00  | 0.44 |
| 0  | -5 | 15  | 0.50  | 0.53 |
| -8 | -6 | 15  | -0.06 | 0.54 |
| 8  | -6 | -15 | -0.60 | 0.55 |
| 8  | 6  | -15 | 0.53  | 0.53 |
| -8 | 6  | 15  | 0.36  | 0.46 |
| -7 | -6 | 15  | -0.12 | 0.50 |
| 7  | -6 | -15 | 0.10  | 0.60 |
| 7  | 6  | -15 | -0.05 | 0.42 |
| -7 | 6  | 15  | -0.09 | 0.48 |
| -6 | -6 | 15  | 0.37  | 0.54 |
| 6  | -6 | -15 | 1.27  | 0.61 |
| -6 | 6  | 15  | 0.75  | 0.48 |
| 6  | 6  | -15 | 1.39  | 0.49 |
| 5  | -6 | -15 | -0.18 | 0.52 |
| -5 | -6 | 15  | 0.65  | 0.54 |
| 5  | 6  | -15 | -0.10 | 0.44 |
| -5 | 6  | 15  | 0.18  | 0.37 |
| 4  | -6 | -15 | 1.10  | 0.55 |

|    |    |     |       |      |
|----|----|-----|-------|------|
| -4 | 6  | 15  | 0.13  | 0.36 |
| 4  | 6  | -15 | 0.50  | 0.45 |
| 3  | -6 | -15 | 0.67  | 0.54 |
| -3 | 6  | 15  | 1.21  | 0.45 |
| 3  | 6  | -15 | 0.57  | 0.45 |
| -2 | -6 | 15  | 2.05  | 0.56 |
| 2  | -6 | -15 | 1.71  | 0.59 |
| -2 | 6  | 15  | 1.21  | 0.40 |
| 2  | 6  | -15 | 1.23  | 0.46 |
| -1 | -6 | 15  | 0.20  | 0.49 |
| 1  | 6  | -15 | -0.50 | 0.41 |
| 0  | -6 | -15 | -0.45 | 0.44 |
| 0  | 6  | -15 | -0.10 | 0.44 |
| 8  | 7  | -15 | -0.02 | 0.65 |
| -7 | -7 | 15  | -0.05 | 0.47 |
| 7  | 7  | -15 | -0.35 | 0.41 |
| -6 | -7 | 15  | 0.85  | 0.51 |
| 6  | -7 | -15 | -0.15 | 0.60 |
| -6 | 7  | 15  | 0.12  | 0.42 |
| 6  | 7  | -15 | 1.39  | 0.54 |
| -5 | -7 | 15  | 0.20  | 0.54 |
| 5  | -7 | -15 | -0.24 | 0.53 |
| -5 | 7  | 15  | 0.22  | 0.39 |
| 4  | -7 | -15 | 1.27  | 0.59 |
| 4  | 7  | -15 | -0.09 | 0.44 |
| -4 | 7  | 15  | 0.23  | 0.37 |
| 3  | -7 | -15 | 0.58  | 0.93 |
| 3  | 7  | -15 | 1.02  | 0.48 |
| -3 | 7  | 15  | 0.52  | 0.43 |
| -2 | -7 | 15  | 0.31  | 0.46 |
| 2  | 7  | -15 | 0.55  | 0.46 |
| -2 | 7  | 15  | 0.05  | 0.36 |
| -1 | -7 | 15  | 0.04  | 0.51 |
| 1  | 7  | -15 | -0.21 | 0.47 |
| 7  | 8  | -15 | -0.06 | 0.50 |
| 6  | 8  | -15 | 0.35  | 0.50 |
| -3 | 8  | 15  | 0.38  | 0.66 |
| -2 | -8 | 15  | 0.17  | 0.52 |
| -9 | 0  | 16  | -0.01 | 0.50 |
| 8  | 0  | -16 | -0.14 | 0.68 |
| -8 | 0  | 16  | 0.21  | 0.44 |
| 7  | 0  | -16 | -0.32 | 0.52 |
| -7 | 0  | 16  | 0.09  | 0.47 |
| 6  | 0  | -16 | 0.92  | 0.58 |
| -6 | 0  | 16  | 0.04  | 0.46 |
| 5  | 0  | -16 | -0.22 | 0.50 |

-5 0 16 0.34 0.40  
-4 0 16 0.52 0.51  
4 0 -16 0.85 0.54  
3 0 -16 0.46 0.50  
-2 0 16 -0.45 0.62  
-1 0 16 -0.83 0.61  
1 0 -16 0.25 0.44  
0 0 16 -0.09 0.66  
0 0 -16 0.55 0.45  
-11 -1 16 -0.13 0.79  
10 -1 -16 0.16 0.62  
9 -1 -16 0.43 0.65  
9 1 -16 1.80 0.58  
-9 1 16 2.12 0.60  
8 -1 -16 0.19 0.60  
-8 1 16 0.99 0.49  
7 -1 -16 0.57 0.60  
-7 1 16 0.91 0.46  
6 -1 -16 0.48 0.55  
-6 -1 16 0.36 0.46  
-6 1 16 0.58 0.48  
5 -1 -16 1.05 0.58  
-5 -1 16 0.63 0.41  
-5 1 16 0.21 0.40  
4 -1 -16 0.72 0.52  
4 1 -16 0.11 0.54  
-4 1 16 0.98 0.45  
3 -1 -16 0.74 0.51  
3 1 -16 0.36 0.51  
-2 -1 16 0.21 0.64  
-1 -1 16 0.70 0.71  
1 -1 -16 1.10 0.45  
-1 1 16 0.92 0.70  
1 1 -16 1.63 0.49  
0 -1 -16 0.25 0.45  
0 -1 16 0.48 0.72  
0 1 -16 0.26 0.42  
0 1 16 0.25 0.72  
10 -2 -16 -0.75 0.58  
-10 -2 16 0.16 0.53  
9 -2 -16 -0.57 0.58  
-9 -2 16 0.17 0.53  
-9 2 16 0.90 0.57  
9 2 -16 0.40 0.46  
8 -2 -16 0.30 0.58  
-8 2 16 1.10 0.48

|     |    |     |       |      |
|-----|----|-----|-------|------|
| 8   | 2  | -16 | 0.61  | 0.50 |
| 7   | -2 | -16 | 1.08  | 0.62 |
| 7   | 2  | -16 | 1.40  | 0.52 |
| -7  | 2  | 16  | 0.94  | 0.46 |
| 6   | -2 | -16 | 1.10  | 0.63 |
| -6  | 2  | 16  | 0.38  | 0.44 |
| 6   | 2  | -16 | 0.64  | 0.47 |
| 5   | -2 | -16 | 0.82  | 0.56 |
| -5  | 2  | 16  | 0.34  | 0.41 |
| 5   | 2  | -16 | 0.36  | 0.45 |
| 4   | -2 | -16 | 0.90  | 0.54 |
| -4  | 2  | 16  | 0.53  | 0.48 |
| 3   | -2 | -16 | 0.57  | 0.53 |
| 1   | -2 | -16 | -0.71 | 0.39 |
| -1  | -2 | 16  | -1.32 | 0.58 |
| 1   | 2  | -16 | 0.69  | 0.42 |
| -1  | 2  | 16  | -0.36 | 0.68 |
| 0   | -2 | 16  | 0.76  | 0.68 |
| 0   | -2 | -16 | 0.10  | 0.44 |
| 0   | 2  | -16 | 0.81  | 0.50 |
| -10 | -3 | 16  | 1.59  | 0.82 |
| 9   | -3 | -16 | -0.41 | 0.59 |
| -9  | -3 | 16  | 0.43  | 0.55 |
| 8   | -3 | -16 | 2.49  | 0.72 |
| -8  | -3 | 16  | 1.92  | 0.61 |
| -8  | 3  | 16  | 1.89  | 0.54 |
| 8   | 3  | -16 | 2.59  | 0.60 |
| 7   | -3 | -16 | 0.22  | 0.56 |
| -7  | -3 | 16  | 0.49  | 0.52 |
| -7  | 3  | 16  | 1.04  | 0.54 |
| 7   | 3  | -16 | 0.42  | 0.43 |
| 6   | -3 | -16 | -0.07 | 0.54 |
| -6  | 3  | 16  | 0.00  | 0.48 |
| 6   | 3  | -16 | -0.30 | 0.43 |
| 5   | -3 | -16 | 1.09  | 0.59 |
| 5   | 3  | -16 | 0.89  | 0.47 |
| -5  | 3  | 16  | 1.36  | 0.47 |
| 4   | -3 | -16 | 0.32  | 0.54 |
| -4  | 3  | 16  | 0.11  | 0.47 |
| 3   | -3 | -16 | 1.58  | 0.58 |
| -1  | -3 | 16  | 0.95  | 0.64 |
| 1   | 3  | -16 | 1.99  | 0.52 |
| -1  | 3  | 16  | 2.64  | 1.19 |
| 0   | -3 | -16 | -0.32 | 0.45 |
| -9  | -4 | 16  | 0.50  | 0.55 |
| -8  | -4 | 16  | 0.25  | 0.55 |

|    |    |     |       |      |
|----|----|-----|-------|------|
| 8  | -4 | -16 | 0.00  | 0.60 |
| 8  | 4  | -16 | -0.21 | 0.40 |
| -7 | -4 | 16  | 0.32  | 0.51 |
| 7  | -4 | -16 | -0.84 | 0.55 |
| -7 | 4  | 16  | 0.01  | 0.50 |
| 7  | 4  | -16 | -0.11 | 0.47 |
| -6 | -4 | 16  | -0.08 | 0.47 |
| 6  | -4 | -16 | -0.32 | 0.53 |
| -6 | 4  | 16  | -0.04 | 0.41 |
| 6  | 4  | -16 | -0.07 | 0.44 |
| 5  | -4 | -16 | 0.62  | 0.58 |
| -5 | -4 | 16  | 0.77  | 0.52 |
| 5  | 4  | -16 | 0.64  | 0.59 |
| -5 | 4  | 16  | 1.17  | 0.51 |
| 4  | -4 | -16 | 0.90  | 0.57 |
| -4 | 4  | 16  | 0.74  | 0.49 |
| 4  | 4  | -16 | 0.98  | 0.53 |
| 3  | -4 | -16 | 1.66  | 0.63 |
| -3 | 4  | 16  | 1.05  | 0.49 |
| -1 | -4 | 16  | 1.19  | 0.64 |
| 1  | 4  | -16 | 0.58  | 0.41 |
| -8 | -5 | 16  | 0.25  | 0.48 |
| -7 | -5 | 16  | 0.47  | 0.55 |
| 7  | 5  | -16 | 0.53  | 0.50 |
| -6 | -5 | 16  | 0.68  | 0.54 |
| 6  | -5 | -16 | 0.81  | 0.65 |
| 6  | 5  | -16 | 0.74  | 0.50 |
| -6 | 5  | 16  | 1.41  | 0.55 |
| 5  | -5 | -16 | 1.01  | 0.62 |
| -5 | -5 | 16  | 0.00  | 0.50 |
| -5 | 5  | 16  | 0.93  | 0.52 |
| 4  | -5 | -16 | 1.28  | 0.66 |
| -4 | 5  | 16  | 1.03  | 0.50 |
| 4  | 5  | -16 | 0.63  | 0.46 |
| 3  | 5  | -16 | 1.11  | 0.47 |
| -3 | 5  | 16  | 0.74  | 0.47 |
| -1 | -5 | 16  | 0.39  | 0.82 |
| 7  | 6  | -16 | 0.47  | 0.51 |
| -6 | -6 | 16  | 0.19  | 0.55 |
| 6  | 6  | -16 | 0.16  | 0.43 |
| -5 | 6  | 16  | 0.52  | 0.72 |
| -4 | 6  | 16  | 0.44  | 0.41 |
| 4  | 6  | -16 | 0.34  | 0.44 |
| 3  | 6  | -16 | 0.29  | 0.43 |
| -3 | 6  | 16  | -0.23 | 0.41 |
| 2  | 6  | -16 | 0.74  | 0.67 |

|    |    |     |       |      |
|----|----|-----|-------|------|
| -7 | 0  | 17  | -0.36 | 0.42 |
| -6 | 0  | 17  | -0.69 | 0.45 |
| -5 | 0  | 17  | 0.11  | 0.50 |
| 5  | 0  | -17 | 0.13  | 0.59 |
| 4  | 0  | -17 | -0.07 | 0.52 |
| 3  | 0  | -17 | 0.04  | 0.52 |
| 8  | -1 | -17 | 0.16  | 0.61 |
| 7  | -1 | -17 | -0.61 | 0.56 |
| -7 | 1  | 17  | -0.51 | 0.48 |
| 7  | 1  | -17 | -0.34 | 0.46 |
| 6  | -1 | -17 | 0.23  | 0.61 |
| -6 | 1  | 17  | -0.16 | 0.48 |
| 5  | -1 | -17 | -0.21 | 0.55 |
| -5 | 1  | 17  | -0.05 | 0.49 |
| 4  | -1 | -17 | 0.94  | 0.58 |
| 3  | -1 | -17 | 0.89  | 0.57 |
| 8  | -2 | -17 | 0.32  | 1.04 |
| 7  | -2 | -17 | 0.73  | 0.63 |
| 7  | 2  | -17 | 0.77  | 0.51 |
| 6  | -2 | -17 | -0.43 | 0.55 |
| 6  | 2  | -17 | -0.42 | 0.45 |
| -6 | 2  | 17  | 0.22  | 0.50 |
| 5  | -2 | -17 | 0.15  | 0.59 |
| -5 | 2  | 17  | 0.09  | 0.43 |
| 4  | -2 | -17 | 0.34  | 0.57 |
| -6 | 3  | 17  | 0.32  | 0.52 |
| 6  | 3  | -17 | 0.37  | 0.47 |
| -5 | 3  | 17  | 0.30  | 0.45 |
| 6  | 4  | -17 | -0.02 | 0.53 |
| -4 | 4  | 17  | 0.07  | 0.50 |
| 0  | 0  | 0   | 0.00  | 0.00 |

;

\_shelx\_hkl\_checksum 63801
